# Supplementary material for: Comparison of Large Language Models in Answering Immuno-Oncology Questions: A Cross-Sectional Study
Source: PubMed Central journal article supplement — medRxiv. 2023 Oct 31:2023.10.31.23297825. Preprint. [Version 1] doi: 10.1101/2023.10.31.23297825 (PMC10705618; doi:10.1101/2023.10.31.23297825), 2023-10-31
Supplement: media-2.pdf [file media-2.pdf]

## **Supplementary Material B**

- List of responses by ChatGPT-3.5, ChatGPT-4, and Google Bard.

ChatGPT-3.5 - MECHANISMS

|           |                                                                                                                                                                                                                                                                                                                                                                                                                                                                                                                                                                                                                                                                                                                                                                                                                                                                                                                                                                                                                                                                                                                                                                                                                                                                                                                                                                                  |                                                                                                                                                                                                                                                                                                                                                                                                                                                                                                                                                                                                                                                                                                                                                                                                                                                                                                                                                                                                                                                                                                                                                                                                                                                                                                                                                                                                                                                                                                                                                                                                                                                                                                                      |                                                                                                                                                                                                                                                                                                                                                                                                                                                                                                                                                                                                                                                                                                                                                                                                                                                                                                                                                                                                                                                                                                                                                                                                                                                                                                                                                                                                                                                                                                                                                                                                                                                                             |
|-----------|----------------------------------------------------------------------------------------------------------------------------------------------------------------------------------------------------------------------------------------------------------------------------------------------------------------------------------------------------------------------------------------------------------------------------------------------------------------------------------------------------------------------------------------------------------------------------------------------------------------------------------------------------------------------------------------------------------------------------------------------------------------------------------------------------------------------------------------------------------------------------------------------------------------------------------------------------------------------------------------------------------------------------------------------------------------------------------------------------------------------------------------------------------------------------------------------------------------------------------------------------------------------------------------------------------------------------------------------------------------------------------|----------------------------------------------------------------------------------------------------------------------------------------------------------------------------------------------------------------------------------------------------------------------------------------------------------------------------------------------------------------------------------------------------------------------------------------------------------------------------------------------------------------------------------------------------------------------------------------------------------------------------------------------------------------------------------------------------------------------------------------------------------------------------------------------------------------------------------------------------------------------------------------------------------------------------------------------------------------------------------------------------------------------------------------------------------------------------------------------------------------------------------------------------------------------------------------------------------------------------------------------------------------------------------------------------------------------------------------------------------------------------------------------------------------------------------------------------------------------------------------------------------------------------------------------------------------------------------------------------------------------------------------------------------------------------------------------------------------------|-----------------------------------------------------------------------------------------------------------------------------------------------------------------------------------------------------------------------------------------------------------------------------------------------------------------------------------------------------------------------------------------------------------------------------------------------------------------------------------------------------------------------------------------------------------------------------------------------------------------------------------------------------------------------------------------------------------------------------------------------------------------------------------------------------------------------------------------------------------------------------------------------------------------------------------------------------------------------------------------------------------------------------------------------------------------------------------------------------------------------------------------------------------------------------------------------------------------------------------------------------------------------------------------------------------------------------------------------------------------------------------------------------------------------------------------------------------------------------------------------------------------------------------------------------------------------------------------------------------------------------------------------------------------------------|
| <p>Q1</p> | <p>Immunotherapy drugs work differently from traditional cancer treatments such as chemotherapy or radiation therapy. Instead of directly killing cancer cells, immunotherapy drugs stimulate the body's immune system to recognize and attack cancer cells more effectively.</p> <p>There are different types of immunotherapy drugs, but one common approach is the use of immune checkpoint inhibitors. These drugs block certain proteins on immune cells or cancer cells, allowing the immune system to recognize and attack cancer cells. For example, drugs targeting the programmed cell death protein 1 (PD-1) or its ligand (PD-L1) can prevent cancer cells from evading the immune system's response.</p> <p>Other types of immunotherapy drugs, such as CAR-T cell therapy, involve modifying a patient's own immune cells (T cells) in a laboratory to express specific receptors that recognize cancer cells. These modified T cells are then infused back into the patient's body to target and kill cancer cells.</p> <p>It's important to note that while immunotherapy drugs can be highly effective in some cases, they don't work for all types of cancer or all patients. The response to immunotherapy can vary depending on factors such as the type and stage of cancer, the individual's immune system, and specific characteristics of the tumor.</p> | <p>Apologies for the confusion in my previous response. While immunotherapy drugs do not directly kill cancer cells in the same way that chemotherapy or radiation therapy does, there are certain types of immunotherapy that can directly target and destroy cancer cells.</p> <p>One example of such immunotherapy is called monoclonal antibody therapy. Monoclonal antibodies are designed to bind to specific proteins or markers found on cancer cells. By attaching to these proteins, the antibodies can either stimulate the immune system to attack the cancer cells or directly interfere with the cancer cell's growth and survival mechanisms. This can result in the destruction of cancer cells.</p> <p>Additionally, there are certain immunotherapy approaches, such as antibody-drug conjugates, where an antibody is linked to a cytotoxic drug. The antibody selectively targets cancer cells and delivers the attached drug specifically to those cells, leading to their destruction.</p> <p>However, it's important to note that not all immunotherapy drugs directly kill cancer cells. Some immunotherapies, such as immune checkpoint inhibitors, work by blocking proteins that inhibit the immune system's response against cancer cells. These drugs enhance the immune system's ability to recognize and attack cancer cells, rather than directly killing the cells themselves.</p> <p>Overall, the specific mechanism of action of immunotherapy drugs can vary depending on the type of immunotherapy and the specific drug being used. Some immunotherapies directly target and kill cancer cells, while others work by boosting the immune system's response against cancer.</p> | <p>Immunotherapy drugs typically do not directly kill cancer cells in the same way that traditional chemotherapy drugs do. The primary goal of immunotherapy is to stimulate the body's immune system to recognize and attack cancer cells more effectively.</p> <p>Immunotherapy can work through various mechanisms. For instance, immune checkpoint inhibitors block proteins on immune cells or cancer cells, such as PD-1 or PD-L1, allowing the immune system to mount a stronger response against cancer cells. This helps the immune system to recognize and eliminate cancer cells.</p> <p>Another type of immunotherapy, CAR-T cell therapy, involves modifying a patient's own immune cells to express receptors called chimeric antigen receptors (CARs). These CARs enable the modified T cells to recognize specific proteins on the surface of cancer cells and directly kill them.</p> <p>There are also some antibody-based immunotherapies, such as monoclonal antibodies, that can directly target cancer cells. These antibodies are designed to bind to specific proteins on cancer cells, which can trigger the immune system's response against the cancer or interfere with the cancer cells' growth and survival.</p> <p>While these examples show instances where immunotherapy drugs can directly impact cancer cells, it's important to note that not all immunotherapies have this direct cytotoxic effect. Immunotherapy primarily focuses on enhancing the immune system's ability to recognize and eliminate cancer cells. The specific mechanism of action may vary depending on the type of immunotherapy and the specific drug used.</p> |
|-----------|----------------------------------------------------------------------------------------------------------------------------------------------------------------------------------------------------------------------------------------------------------------------------------------------------------------------------------------------------------------------------------------------------------------------------------------------------------------------------------------------------------------------------------------------------------------------------------------------------------------------------------------------------------------------------------------------------------------------------------------------------------------------------------------------------------------------------------------------------------------------------------------------------------------------------------------------------------------------------------------------------------------------------------------------------------------------------------------------------------------------------------------------------------------------------------------------------------------------------------------------------------------------------------------------------------------------------------------------------------------------------------|----------------------------------------------------------------------------------------------------------------------------------------------------------------------------------------------------------------------------------------------------------------------------------------------------------------------------------------------------------------------------------------------------------------------------------------------------------------------------------------------------------------------------------------------------------------------------------------------------------------------------------------------------------------------------------------------------------------------------------------------------------------------------------------------------------------------------------------------------------------------------------------------------------------------------------------------------------------------------------------------------------------------------------------------------------------------------------------------------------------------------------------------------------------------------------------------------------------------------------------------------------------------------------------------------------------------------------------------------------------------------------------------------------------------------------------------------------------------------------------------------------------------------------------------------------------------------------------------------------------------------------------------------------------------------------------------------------------------|-----------------------------------------------------------------------------------------------------------------------------------------------------------------------------------------------------------------------------------------------------------------------------------------------------------------------------------------------------------------------------------------------------------------------------------------------------------------------------------------------------------------------------------------------------------------------------------------------------------------------------------------------------------------------------------------------------------------------------------------------------------------------------------------------------------------------------------------------------------------------------------------------------------------------------------------------------------------------------------------------------------------------------------------------------------------------------------------------------------------------------------------------------------------------------------------------------------------------------------------------------------------------------------------------------------------------------------------------------------------------------------------------------------------------------------------------------------------------------------------------------------------------------------------------------------------------------------------------------------------------------------------------------------------------------|

|           |                                                                                                                                                                                                                                                                                                                                                                                                                                                                                                                                                                                                                                                                                                                                                                                                                                                                                                                                                                                                                                                                                                                                                                                                                                                                                                                                                                                                                                                                                                                                                                                                                                                                                                                                                                                                                                                                                                                    |                                                                                                                                                                                                                                                                                                                                                                                                                                                                                                                                                                                                                                                                                                                                                                                                                                                                                                                                                                                                                                                                                                                                                                                                                                                                                                                                                                                                                                                                                                                                                                                                                                                                                                                                                                                                                                                                                                                                                                                                                                                                                                                                                                            |                                                                                                                                                                                                                                                                                                                                                                                                                                                                                                                                                                                                                                                                                                                                                                                                                                                                                                                                                                                                                                                                                                                                                                                                                                                                                                                                                                                                                                                                                                                                                                                                                                                                                                                                                                                                                                                                                                                                                                                                                                                                                                                                                                                                                                                                          |
|-----------|--------------------------------------------------------------------------------------------------------------------------------------------------------------------------------------------------------------------------------------------------------------------------------------------------------------------------------------------------------------------------------------------------------------------------------------------------------------------------------------------------------------------------------------------------------------------------------------------------------------------------------------------------------------------------------------------------------------------------------------------------------------------------------------------------------------------------------------------------------------------------------------------------------------------------------------------------------------------------------------------------------------------------------------------------------------------------------------------------------------------------------------------------------------------------------------------------------------------------------------------------------------------------------------------------------------------------------------------------------------------------------------------------------------------------------------------------------------------------------------------------------------------------------------------------------------------------------------------------------------------------------------------------------------------------------------------------------------------------------------------------------------------------------------------------------------------------------------------------------------------------------------------------------------------|----------------------------------------------------------------------------------------------------------------------------------------------------------------------------------------------------------------------------------------------------------------------------------------------------------------------------------------------------------------------------------------------------------------------------------------------------------------------------------------------------------------------------------------------------------------------------------------------------------------------------------------------------------------------------------------------------------------------------------------------------------------------------------------------------------------------------------------------------------------------------------------------------------------------------------------------------------------------------------------------------------------------------------------------------------------------------------------------------------------------------------------------------------------------------------------------------------------------------------------------------------------------------------------------------------------------------------------------------------------------------------------------------------------------------------------------------------------------------------------------------------------------------------------------------------------------------------------------------------------------------------------------------------------------------------------------------------------------------------------------------------------------------------------------------------------------------------------------------------------------------------------------------------------------------------------------------------------------------------------------------------------------------------------------------------------------------------------------------------------------------------------------------------------------------|--------------------------------------------------------------------------------------------------------------------------------------------------------------------------------------------------------------------------------------------------------------------------------------------------------------------------------------------------------------------------------------------------------------------------------------------------------------------------------------------------------------------------------------------------------------------------------------------------------------------------------------------------------------------------------------------------------------------------------------------------------------------------------------------------------------------------------------------------------------------------------------------------------------------------------------------------------------------------------------------------------------------------------------------------------------------------------------------------------------------------------------------------------------------------------------------------------------------------------------------------------------------------------------------------------------------------------------------------------------------------------------------------------------------------------------------------------------------------------------------------------------------------------------------------------------------------------------------------------------------------------------------------------------------------------------------------------------------------------------------------------------------------------------------------------------------------------------------------------------------------------------------------------------------------------------------------------------------------------------------------------------------------------------------------------------------------------------------------------------------------------------------------------------------------------------------------------------------------------------------------------------------------|
| <p>Q2</p> | <p>An immune checkpoint is a regulatory mechanism in the immune system that helps maintain a balance between immune responses and the prevention of excessive or inappropriate immune reactions. Immune checkpoints play a crucial role in preventing immune system overactivation and protecting normal tissues from damage.</p> <p>In cancer, immune checkpoints can be exploited by tumor cells to evade immune attacks. Tumors can express certain proteins on their surface or release signaling molecules that interact with receptors on immune cells, thereby inhibiting the immune response against the tumor. This inhibition allows cancer cells to escape recognition and destruction by the immune system.</p> <p>One well-known immune checkpoint pathway involves the interaction between programmed cell death protein 1 (PD-1), which is found on the surface of immune cells, and programmed death-ligand 1 (PD-L1), which can be expressed by both cancer cells and normal cells in the body. When PD-1 on immune cells binds to PD-L1 on cancer cells, it sends an inhibitory signal that weakens the immune response against the tumor.</p> <p>Other immune checkpoints and associated proteins include cytotoxic T-lymphocyte-associated protein 4 (CTLA-4), lymphocyte-activation gene 3 (LAG-3), and T-cell immunoglobulin and mucin domain-containing protein 3 (TIM-3), among others. Each of these checkpoints has its own specific ligands or binding partners that regulate immune responses.</p> <p>The development of immune checkpoint inhibitors, such as anti-PD-1 or anti-CTLA-4 antibodies, has revolutionized cancer treatment. These drugs block the interaction between immune checkpoints and their ligands, allowing the immune system to mount a more effective response against cancer cells by unleashing the immune cells' ability to recognize and destroy them.</p> | <p>An immune checkpoint refers to a regulatory mechanism in the immune system that helps maintain a balance in immune responses. These checkpoints act as control points or pathways that regulate the activation or inhibition of immune cells, ensuring appropriate immune responses and preventing excessive immune reactions that can damage healthy tissues.</p> <p>Immune checkpoints play a crucial role in regulating the duration and intensity of immune responses, avoiding chronic inflammation, and protecting normal cells from immune-mediated damage. They act as "brakes" in the immune system, preventing uncontrolled immune activation and maintaining immune homeostasis.</p> <p>One of the well-known immune checkpoint pathways involves the interaction between certain proteins on immune cells and their ligands on target cells. For example, the interaction between programmed cell death protein 1 (PD-1) on immune cells and programmed death-ligand 1 (PD-L1) on target cells is an important immune checkpoint pathway. When PD-1 binds to PD-L1, it transmits an inhibitory signal that dampens immune responses, preventing immune cells from attacking normal cells.</p> <p>In cancer, tumors can exploit these immune checkpoints to evade the immune system. They can express checkpoint ligands, such as PD-L1, which interact with checkpoint receptors on immune cells, leading to immune suppression and allowing the tumor cells to escape immune surveillance.</p> <p>Immunotherapy drugs known as immune checkpoint inhibitors are designed to block these interactions. They target and inhibit the checkpoint receptors or ligands, such as PD-1 or PD-L1, unleashing the immune system's ability to recognize and attack cancer cells effectively.</p> <p>By blocking immune checkpoints, these inhibitors release the "brakes" on the immune system, enhancing the anti-tumor immune response and improving the immune system's ability to target and kill cancer cells. Immune checkpoint inhibitors have shown remarkable success in treating certain types of cancer and have revolutionized cancer immunotherapy.</p> | <p>An immune checkpoint refers to a molecular pathway or interaction between immune cells and target cells that regulates the immune response. Immune checkpoints play a crucial role in maintaining a balance between immune activation and immune regulation, ensuring effective immune responses while preventing excessive immune reactions that can harm normal tissues.</p> <p>The immune system employs checkpoints as a means of self-regulation to avoid overactivation and to prevent immune responses from causing damage to healthy cells and tissues. These checkpoints act as "checks and balances" to modulate the intensity, duration, and specificity of immune responses.</p> <p>One well-known immune checkpoint pathway involves the interaction between receptors and ligands on immune cells and target cells. For example, the interaction between programmed cell death protein 1 (PD-1), a receptor on immune cells, and programmed death-ligand 1 (PD-L1), a ligand on target cells, is a critical immune checkpoint pathway. When PD-1 binds to PD-L1, it transmits an inhibitory signal that dampens immune responses, preventing immune cells from attacking normal cells.</p> <p>In the context of cancer, tumors can exploit immune checkpoints to evade the immune system's surveillance and attack. Cancer cells can upregulate the expression of checkpoint ligands like PD-L1, effectively "turning off" immune responses and allowing the tumor to evade immune destruction.</p> <p>Immunotherapy drugs known as immune checkpoint inhibitors are designed to block the interactions between immune checkpoints and their ligands. These inhibitors can target and inhibit immune checkpoint receptors or ligands, such as PD-1 or PD-L1, releasing the inhibition on the immune response. By blocking immune checkpoints, these drugs help restore and enhance the immune system's ability to recognize and eliminate cancer cells.</p> <p>Immune checkpoint inhibitors have shown significant success in the treatment of various cancers and have become a transformative approach in cancer immunotherapy. They work by unleashing the immune system's potential to mount a potent and specific attack against cancer cells.</p> |
|-----------|--------------------------------------------------------------------------------------------------------------------------------------------------------------------------------------------------------------------------------------------------------------------------------------------------------------------------------------------------------------------------------------------------------------------------------------------------------------------------------------------------------------------------------------------------------------------------------------------------------------------------------------------------------------------------------------------------------------------------------------------------------------------------------------------------------------------------------------------------------------------------------------------------------------------------------------------------------------------------------------------------------------------------------------------------------------------------------------------------------------------------------------------------------------------------------------------------------------------------------------------------------------------------------------------------------------------------------------------------------------------------------------------------------------------------------------------------------------------------------------------------------------------------------------------------------------------------------------------------------------------------------------------------------------------------------------------------------------------------------------------------------------------------------------------------------------------------------------------------------------------------------------------------------------------|----------------------------------------------------------------------------------------------------------------------------------------------------------------------------------------------------------------------------------------------------------------------------------------------------------------------------------------------------------------------------------------------------------------------------------------------------------------------------------------------------------------------------------------------------------------------------------------------------------------------------------------------------------------------------------------------------------------------------------------------------------------------------------------------------------------------------------------------------------------------------------------------------------------------------------------------------------------------------------------------------------------------------------------------------------------------------------------------------------------------------------------------------------------------------------------------------------------------------------------------------------------------------------------------------------------------------------------------------------------------------------------------------------------------------------------------------------------------------------------------------------------------------------------------------------------------------------------------------------------------------------------------------------------------------------------------------------------------------------------------------------------------------------------------------------------------------------------------------------------------------------------------------------------------------------------------------------------------------------------------------------------------------------------------------------------------------------------------------------------------------------------------------------------------------|--------------------------------------------------------------------------------------------------------------------------------------------------------------------------------------------------------------------------------------------------------------------------------------------------------------------------------------------------------------------------------------------------------------------------------------------------------------------------------------------------------------------------------------------------------------------------------------------------------------------------------------------------------------------------------------------------------------------------------------------------------------------------------------------------------------------------------------------------------------------------------------------------------------------------------------------------------------------------------------------------------------------------------------------------------------------------------------------------------------------------------------------------------------------------------------------------------------------------------------------------------------------------------------------------------------------------------------------------------------------------------------------------------------------------------------------------------------------------------------------------------------------------------------------------------------------------------------------------------------------------------------------------------------------------------------------------------------------------------------------------------------------------------------------------------------------------------------------------------------------------------------------------------------------------------------------------------------------------------------------------------------------------------------------------------------------------------------------------------------------------------------------------------------------------------------------------------------------------------------------------------------------------|

|           |                                                                                                                                                                                                                                                                                                                                                                                                                                                                                                                                                                                                                                                                                                                                                                                                                                                                                                                                                                                                                                                                                                                                                                                                                                                                                                                                                                                                                                                                                                                                                                |                                                                                                                                                                                                                                                                                                                                                                                                                                                                                                                                                                                                                                                                                                                                                                                                                                                                                                                                                                                                                                                                                                                                                                                                                                                                                                                                                                                                                                                                                                                                                                                                                                                                                                                                                                                               |                                                                                                                                                                                                                                                                                                                                                                                                                                                                                                                                                                                                                                                                                                                                                                                                                                                                                                                                                                                                                                                                                                                                                                                                                                                                                                                                                                                                                                                                                                                                                                                                                                                                                                                                                                       |
|-----------|----------------------------------------------------------------------------------------------------------------------------------------------------------------------------------------------------------------------------------------------------------------------------------------------------------------------------------------------------------------------------------------------------------------------------------------------------------------------------------------------------------------------------------------------------------------------------------------------------------------------------------------------------------------------------------------------------------------------------------------------------------------------------------------------------------------------------------------------------------------------------------------------------------------------------------------------------------------------------------------------------------------------------------------------------------------------------------------------------------------------------------------------------------------------------------------------------------------------------------------------------------------------------------------------------------------------------------------------------------------------------------------------------------------------------------------------------------------------------------------------------------------------------------------------------------------|-----------------------------------------------------------------------------------------------------------------------------------------------------------------------------------------------------------------------------------------------------------------------------------------------------------------------------------------------------------------------------------------------------------------------------------------------------------------------------------------------------------------------------------------------------------------------------------------------------------------------------------------------------------------------------------------------------------------------------------------------------------------------------------------------------------------------------------------------------------------------------------------------------------------------------------------------------------------------------------------------------------------------------------------------------------------------------------------------------------------------------------------------------------------------------------------------------------------------------------------------------------------------------------------------------------------------------------------------------------------------------------------------------------------------------------------------------------------------------------------------------------------------------------------------------------------------------------------------------------------------------------------------------------------------------------------------------------------------------------------------------------------------------------------------|-----------------------------------------------------------------------------------------------------------------------------------------------------------------------------------------------------------------------------------------------------------------------------------------------------------------------------------------------------------------------------------------------------------------------------------------------------------------------------------------------------------------------------------------------------------------------------------------------------------------------------------------------------------------------------------------------------------------------------------------------------------------------------------------------------------------------------------------------------------------------------------------------------------------------------------------------------------------------------------------------------------------------------------------------------------------------------------------------------------------------------------------------------------------------------------------------------------------------------------------------------------------------------------------------------------------------------------------------------------------------------------------------------------------------------------------------------------------------------------------------------------------------------------------------------------------------------------------------------------------------------------------------------------------------------------------------------------------------------------------------------------------------|
| <p>Q3</p> | <p>Nivolumab and pembrolizumab are both immune checkpoint inhibitors, specifically targeting the programmed cell death protein 1 (PD-1) receptor. These drugs are used in cancer treatment and belong to a class of medications known as monoclonal antibodies.</p> <p>Nivolumab is marketed under the brand name Opdivo, while pembrolizumab is marketed as Keytruda. Both drugs work by blocking the interaction between PD-1, which is found on immune cells, and its ligands (PD-L1 and PD-L2) that are often expressed on cancer cells and some normal cells. By inhibiting this interaction, nivolumab and pembrolizumab unleash the immune system's ability to recognize and attack cancer cells more effectively.</p> <p>These drugs have been approved for the treatment of various cancers, including melanoma, non-small cell lung cancer, renal cell carcinoma, head and neck squamous cell carcinoma, Hodgkin lymphoma, and others. They have demonstrated significant clinical benefits and have revolutionized cancer treatment as they can lead to durable responses and improved survival rates in some patients.</p> <p>It's important to note that nivolumab and pembrolizumab are prescribed and administered under the supervision of healthcare professionals, and their use depends on the specific type and stage of cancer being treated. The decision to use these medications is made on an individual basis, taking into account various factors, including the patient's overall health and the characteristics of the tumor.</p> | <p>Nivolumab and pembrolizumab are two immune checkpoint inhibitors that are used in cancer treatment. They are both monoclonal antibodies that target the programmed cell death protein 1 (PD-1) receptor.</p> <p>Nivolumab, marketed under the brand name Opdivo, and pembrolizumab, marketed as Keytruda, work by blocking the interaction between PD-1 and its ligands, PD-L1 and PD-L2. PD-1 is a receptor found on certain immune cells, while PD-L1 and PD-L2 are proteins often expressed on cancer cells and some normal cells. When PD-1 binds to these ligands, it transmits signals that inhibit the immune response against the cells expressing PD-L1 or PD-L2.</p> <p>By blocking the PD-1/PD-L1 interaction, nivolumab and pembrolizumab help unleash the immune system's ability to recognize and attack cancer cells. These drugs essentially remove the "brakes" on the immune response, allowing immune cells to mount a more effective attack against the tumor.</p> <p>Nivolumab and pembrolizumab have been approved by regulatory authorities for the treatment of various cancers, including melanoma, non-small cell lung cancer, renal cell carcinoma, bladder cancer, head and neck squamous cell carcinoma, and others. They have shown significant clinical benefits, including increased overall survival and durable responses in some patients.</p> <p>It's important to note that the use of nivolumab and pembrolizumab is determined on an individual basis, considering factors such as the specific type and stage of cancer, the patient's overall health, and other treatment options. These medications are administered under the supervision of healthcare professionals and may have potential side effects that should be closely monitored.</p> | <p>Nivolumab and pembrolizumab are immune checkpoint inhibitors that belong to a class of drugs known as monoclonal antibodies. They are used in the treatment of cancer.</p> <p>Nivolumab is marketed under the brand name Opdivo, and pembrolizumab is marketed as Keytruda. Both drugs target the programmed cell death protein 1 (PD-1), which is a receptor found on certain immune cells.</p> <p>PD-1 is responsible for regulating the immune system's response to prevent excessive immune activation and maintain self-tolerance. However, cancer cells can exploit the PD-1 pathway by expressing proteins called PD-L1 or PD-L2, which interact with PD-1 and inhibit immune responses against the tumor.</p> <p>Nivolumab and pembrolizumab work by blocking the PD-1/PD-L1 or PD-1/PD-L2 interaction, thereby releasing the brakes on the immune system. This allows immune cells to recognize and attack cancer cells more effectively.</p> <p>These drugs have demonstrated significant clinical benefits in the treatment of various cancers, including melanoma, non-small cell lung cancer, renal cell carcinoma, bladder cancer, head and neck squamous cell carcinoma, and others. They have shown improved overall survival rates, durable responses, and prolonged progression-free survival in some patients.</p> <p>It's important to note that nivolumab and pembrolizumab are prescription medications that are administered under the supervision of healthcare professionals. The use of these drugs depends on various factors, including the specific type and stage of cancer, the patient's overall health, and other treatment options. Potential side effects should also be considered and closely monitored during treatment.</p> |
|-----------|----------------------------------------------------------------------------------------------------------------------------------------------------------------------------------------------------------------------------------------------------------------------------------------------------------------------------------------------------------------------------------------------------------------------------------------------------------------------------------------------------------------------------------------------------------------------------------------------------------------------------------------------------------------------------------------------------------------------------------------------------------------------------------------------------------------------------------------------------------------------------------------------------------------------------------------------------------------------------------------------------------------------------------------------------------------------------------------------------------------------------------------------------------------------------------------------------------------------------------------------------------------------------------------------------------------------------------------------------------------------------------------------------------------------------------------------------------------------------------------------------------------------------------------------------------------|-----------------------------------------------------------------------------------------------------------------------------------------------------------------------------------------------------------------------------------------------------------------------------------------------------------------------------------------------------------------------------------------------------------------------------------------------------------------------------------------------------------------------------------------------------------------------------------------------------------------------------------------------------------------------------------------------------------------------------------------------------------------------------------------------------------------------------------------------------------------------------------------------------------------------------------------------------------------------------------------------------------------------------------------------------------------------------------------------------------------------------------------------------------------------------------------------------------------------------------------------------------------------------------------------------------------------------------------------------------------------------------------------------------------------------------------------------------------------------------------------------------------------------------------------------------------------------------------------------------------------------------------------------------------------------------------------------------------------------------------------------------------------------------------------|-----------------------------------------------------------------------------------------------------------------------------------------------------------------------------------------------------------------------------------------------------------------------------------------------------------------------------------------------------------------------------------------------------------------------------------------------------------------------------------------------------------------------------------------------------------------------------------------------------------------------------------------------------------------------------------------------------------------------------------------------------------------------------------------------------------------------------------------------------------------------------------------------------------------------------------------------------------------------------------------------------------------------------------------------------------------------------------------------------------------------------------------------------------------------------------------------------------------------------------------------------------------------------------------------------------------------------------------------------------------------------------------------------------------------------------------------------------------------------------------------------------------------------------------------------------------------------------------------------------------------------------------------------------------------------------------------------------------------------------------------------------------------|

|                  |                                                                                                                                                                                                                                                                                                                                                                                                                                                                                                                                                                                                                                                                                                                                                                                                                                                                                                                                                                                                                                                                                                                                                                                                                                                                                                                                                                                                                                                                                                                                                                                                                                             |                                                                                                                                                                                                                                                                                                                                                                                                                                                                                          |                                                                                                                                                                                                                                                                                                                                                                                                                                                                                                                                                                                                                                                                                                                                                                                                                                                                                                                                                                                                                                                                                                                                                                                                                                                                                                                            |
|------------------|---------------------------------------------------------------------------------------------------------------------------------------------------------------------------------------------------------------------------------------------------------------------------------------------------------------------------------------------------------------------------------------------------------------------------------------------------------------------------------------------------------------------------------------------------------------------------------------------------------------------------------------------------------------------------------------------------------------------------------------------------------------------------------------------------------------------------------------------------------------------------------------------------------------------------------------------------------------------------------------------------------------------------------------------------------------------------------------------------------------------------------------------------------------------------------------------------------------------------------------------------------------------------------------------------------------------------------------------------------------------------------------------------------------------------------------------------------------------------------------------------------------------------------------------------------------------------------------------------------------------------------------------|------------------------------------------------------------------------------------------------------------------------------------------------------------------------------------------------------------------------------------------------------------------------------------------------------------------------------------------------------------------------------------------------------------------------------------------------------------------------------------------|----------------------------------------------------------------------------------------------------------------------------------------------------------------------------------------------------------------------------------------------------------------------------------------------------------------------------------------------------------------------------------------------------------------------------------------------------------------------------------------------------------------------------------------------------------------------------------------------------------------------------------------------------------------------------------------------------------------------------------------------------------------------------------------------------------------------------------------------------------------------------------------------------------------------------------------------------------------------------------------------------------------------------------------------------------------------------------------------------------------------------------------------------------------------------------------------------------------------------------------------------------------------------------------------------------------------------|
| <p><b>Q4</b></p> | <p>Relatlimab is an immune checkpoint inhibitor that targets the protein LAG-3 (lymphocyte-activation gene 3). It is an investigational drug currently being studied in clinical trials for the treatment of various types of cancer.</p> <p>LAG-3 is a protein found on the surface of immune cells, including T cells. It plays a role in regulating immune responses and maintaining immune tolerance. In cancer, LAG-3 can be upregulated on immune cells and tumor-infiltrating lymphocytes, leading to immune suppression and allowing cancer cells to evade immune surveillance.</p> <p>Relatlimab works by blocking the interaction between LAG-3 and its ligands, such as MHC class II molecules, which are often expressed on antigen-presenting cells and some tumor cells. By inhibiting the LAG-3 pathway, relatlimab aims to enhance the anti-tumor immune response and unleash the immune system's ability to recognize and attack cancer cells.</p> <p>Relatlimab is being evaluated in clinical trials as a monotherapy and in combination with other immunotherapies, such as nivolumab (an anti-PD-1 antibody), to assess its safety and efficacy in various cancer types, including melanoma, lung cancer, and other solid tumors.</p> <p>It's important to note that as of my knowledge cutoff in September 2021, relatlimab was still under investigation, and its regulatory approval and availability may vary based on ongoing clinical trials and regulatory processes. For the most up-to-date and accurate information, it is recommended to consult healthcare professionals or refer to reliable sources.</p> | <p>I apologize for the incorrect information in my previous response. As of my knowledge cutoff in September 2021, there was no approved drug called Relatlimab. It is possible that new drugs or developments have occurred since then. To obtain the most accurate and up-to-date information on Relatlimab, I recommend consulting healthcare professionals or referring to reliable sources such as the U.S. Food and Drug Administration (FDA) or other regulatory authorities.</p> | <p>As of my knowledge cutoff in September 2021, Relatlimab (also known as BMS-986016) is an investigational drug in the class of immune checkpoint inhibitors. It is being developed by Bristol Myers Squibb for the treatment of cancer.</p> <p>Relatlimab specifically targets lymphocyte-activation gene 3 (LAG-3), a protein found on immune cells. LAG-3 plays a role in regulating immune responses and can be upregulated in certain tumor-infiltrating lymphocytes. By blocking LAG-3, Relatlimab aims to enhance the anti-tumor immune response and potentially overcome immune suppression in the tumor microenvironment.</p> <p>Clinical trials for Relatlimab have been conducted to evaluate its safety and efficacy in various types of cancer, including melanoma, non-small cell lung cancer, and other solid tumors. The trials have explored both Relatlimab as a monotherapy and in combination with other immunotherapies.</p> <p>However, it's important to note that clinical trial data and the status of drug development may have progressed since my last knowledge update. For the most accurate and up-to-date information on Relatlimab, I recommend consulting healthcare professionals or referring to reliable sources, including clinical trial databases and regulatory authorities.</p> |
|------------------|---------------------------------------------------------------------------------------------------------------------------------------------------------------------------------------------------------------------------------------------------------------------------------------------------------------------------------------------------------------------------------------------------------------------------------------------------------------------------------------------------------------------------------------------------------------------------------------------------------------------------------------------------------------------------------------------------------------------------------------------------------------------------------------------------------------------------------------------------------------------------------------------------------------------------------------------------------------------------------------------------------------------------------------------------------------------------------------------------------------------------------------------------------------------------------------------------------------------------------------------------------------------------------------------------------------------------------------------------------------------------------------------------------------------------------------------------------------------------------------------------------------------------------------------------------------------------------------------------------------------------------------------|------------------------------------------------------------------------------------------------------------------------------------------------------------------------------------------------------------------------------------------------------------------------------------------------------------------------------------------------------------------------------------------------------------------------------------------------------------------------------------------|----------------------------------------------------------------------------------------------------------------------------------------------------------------------------------------------------------------------------------------------------------------------------------------------------------------------------------------------------------------------------------------------------------------------------------------------------------------------------------------------------------------------------------------------------------------------------------------------------------------------------------------------------------------------------------------------------------------------------------------------------------------------------------------------------------------------------------------------------------------------------------------------------------------------------------------------------------------------------------------------------------------------------------------------------------------------------------------------------------------------------------------------------------------------------------------------------------------------------------------------------------------------------------------------------------------------------|

|                  |                                                                                                                                                                                                                                                                                                                                                                                                                                                                                                                                                                                                                                                                                                                                                                                                                                                                                                                                                                                                                                                                                                                                                                                                                                                                                                                                                                                                                |                                                                                                                                                                                                                                                                                                                                                                                                                                                                                                                                                                                                                                                                                                                                                                                                                                                                                                                                                                                                                                                                                                                                                                                                                                                                                                                                                                                                                                                                                                                                                                                                                                            |                                                                                                                                                                                                                                                                                                                                                                                                                                                                                                                                                                                                                                                                                                                                                                                                                                                                                                                                                                                                                                                                                                                                                                                                                                                                                                                                                                                                                                                                                            |
|------------------|----------------------------------------------------------------------------------------------------------------------------------------------------------------------------------------------------------------------------------------------------------------------------------------------------------------------------------------------------------------------------------------------------------------------------------------------------------------------------------------------------------------------------------------------------------------------------------------------------------------------------------------------------------------------------------------------------------------------------------------------------------------------------------------------------------------------------------------------------------------------------------------------------------------------------------------------------------------------------------------------------------------------------------------------------------------------------------------------------------------------------------------------------------------------------------------------------------------------------------------------------------------------------------------------------------------------------------------------------------------------------------------------------------------|--------------------------------------------------------------------------------------------------------------------------------------------------------------------------------------------------------------------------------------------------------------------------------------------------------------------------------------------------------------------------------------------------------------------------------------------------------------------------------------------------------------------------------------------------------------------------------------------------------------------------------------------------------------------------------------------------------------------------------------------------------------------------------------------------------------------------------------------------------------------------------------------------------------------------------------------------------------------------------------------------------------------------------------------------------------------------------------------------------------------------------------------------------------------------------------------------------------------------------------------------------------------------------------------------------------------------------------------------------------------------------------------------------------------------------------------------------------------------------------------------------------------------------------------------------------------------------------------------------------------------------------------|--------------------------------------------------------------------------------------------------------------------------------------------------------------------------------------------------------------------------------------------------------------------------------------------------------------------------------------------------------------------------------------------------------------------------------------------------------------------------------------------------------------------------------------------------------------------------------------------------------------------------------------------------------------------------------------------------------------------------------------------------------------------------------------------------------------------------------------------------------------------------------------------------------------------------------------------------------------------------------------------------------------------------------------------------------------------------------------------------------------------------------------------------------------------------------------------------------------------------------------------------------------------------------------------------------------------------------------------------------------------------------------------------------------------------------------------------------------------------------------------|
| <p><b>Q5</b></p> | <p>Gardasil is a vaccine used to prevent infections caused by certain strains of the human papillomavirus (HPV). The target of Gardasil is to provide protection against HPV types 16, 18, 6, and 11.</p> <p>HPV is a common sexually transmitted infection that can cause various health problems, including genital warts and certain types of cancers, such as cervical, vaginal, vulvar, anal, penile, and oropharyngeal cancers.</p> <p>Gardasil contains virus-like particles (VLPs) that resemble specific components of the HPV virus. These VLPs trigger the immune system to produce an immune response, including the production of antibodies. The antibodies generated in response to the vaccine can then recognize and neutralize the actual HPV virus if a person is exposed to it in the future.</p> <p>The vaccine is most commonly administered in a series of two or three doses, depending on the age of the individual at the time of vaccination. It is recommended for both males and females and is typically given before potential exposure to HPV through sexual activity.</p> <p>It's important to note that Gardasil provides protection against specific HPV strains but does not protect against all HPV types. Therefore, routine cervical cancer screening is still recommended for vaccinated individuals to detect any potential HPV-related abnormalities or cancers.</p> | <p>Gardasil is a vaccine that targets certain strains of the human papillomavirus (HPV), specifically HPV types 16, 18, 6, and 11.</p> <p>HPV is a common sexually transmitted infection that can cause various health issues, including genital warts and certain types of cancer, such as cervical, vaginal, vulvar, anal, penile, and oropharyngeal cancers.</p> <p>Gardasil contains virus-like particles (VLPs) that resemble specific components of the HPV virus. These VLPs trigger an immune response in the body, leading to the production of antibodies. The antibodies generated by the vaccine help protect against infection by the targeted HPV types.</p> <p>More specifically, Gardasil targets HPV types 16 and 18, which are responsible for the majority of HPV-related cancers, particularly cervical cancer. Additionally, it targets HPV types 6 and 11, which are associated with genital warts and some cases of respiratory papillomatosis (a rare condition where benign tumors develop in the airway).</p> <p>The vaccine is typically administered in a series of two or three doses, depending on the age at which a person receives the vaccine. It is recommended for both males and females and is most effective when given before potential exposure to HPV through sexual activity.</p> <p>It's important to note that while Gardasil provides protection against the targeted HPV types, it does not protect against all HPV strains. Therefore, routine cervical cancer screening is still recommended for vaccinated individuals to detect any potential HPV-related abnormalities or cancers.</p> | <p>Gardasil is a vaccine that targets specific strains of the human papillomavirus (HPV). The primary targets of Gardasil are HPV types 16 and 18, which are known to cause the majority of cervical cancers, as well as various other HPV-related cancers. These high-risk HPV types are specifically targeted by the vaccine.</p> <p>In addition to targeting HPV types 16 and 18, Gardasil also provides protection against HPV types 6 and 11, which are considered low-risk types. HPV 6 and 11 are responsible for causing the majority of genital warts cases.</p> <p>By targeting these specific HPV strains, Gardasil aims to prevent HPV infection and reduce the risk of associated conditions, including cervical, vaginal, vulvar, anal, penile, and oropharyngeal cancers, as well as genital warts.</p> <p>It's worth noting that there are multiple formulations of the Gardasil vaccine, and the specific strains targeted may vary. For example, Gardasil 9 is an updated version of the vaccine that provides protection against additional high-risk HPV types, including types 31, 33, 45, 52, and 58, in addition to types 16 and 18.</p> <p>The use of Gardasil or Gardasil 9 is typically recommended for both males and females and is often administered during adolescence or early adulthood. It is important to consult healthcare professionals for specific recommendations regarding the appropriate age and dosage schedule for Gardasil vaccination.</p> |
|------------------|----------------------------------------------------------------------------------------------------------------------------------------------------------------------------------------------------------------------------------------------------------------------------------------------------------------------------------------------------------------------------------------------------------------------------------------------------------------------------------------------------------------------------------------------------------------------------------------------------------------------------------------------------------------------------------------------------------------------------------------------------------------------------------------------------------------------------------------------------------------------------------------------------------------------------------------------------------------------------------------------------------------------------------------------------------------------------------------------------------------------------------------------------------------------------------------------------------------------------------------------------------------------------------------------------------------------------------------------------------------------------------------------------------------|--------------------------------------------------------------------------------------------------------------------------------------------------------------------------------------------------------------------------------------------------------------------------------------------------------------------------------------------------------------------------------------------------------------------------------------------------------------------------------------------------------------------------------------------------------------------------------------------------------------------------------------------------------------------------------------------------------------------------------------------------------------------------------------------------------------------------------------------------------------------------------------------------------------------------------------------------------------------------------------------------------------------------------------------------------------------------------------------------------------------------------------------------------------------------------------------------------------------------------------------------------------------------------------------------------------------------------------------------------------------------------------------------------------------------------------------------------------------------------------------------------------------------------------------------------------------------------------------------------------------------------------------|--------------------------------------------------------------------------------------------------------------------------------------------------------------------------------------------------------------------------------------------------------------------------------------------------------------------------------------------------------------------------------------------------------------------------------------------------------------------------------------------------------------------------------------------------------------------------------------------------------------------------------------------------------------------------------------------------------------------------------------------------------------------------------------------------------------------------------------------------------------------------------------------------------------------------------------------------------------------------------------------------------------------------------------------------------------------------------------------------------------------------------------------------------------------------------------------------------------------------------------------------------------------------------------------------------------------------------------------------------------------------------------------------------------------------------------------------------------------------------------------|

|           |                                                                                                                                                                                                                                                                                                                                                                                                                                                                                                                                                                                                                                                                                                                                                                                                                                                                                                                                                                                                                                                                                                                                                                                                                                                                                                                                                                                                                                                                                                                                                                                                                                                                                                                                                                                                                                                                                                                                                                                                                                                                                                                                                                                                                                                                                                                                |                                                                                                                                                                                                                                                                                                                                                                                                                                                                                                                                                                                                                                                                                                                                                                                                                                                                                                                                                                                                                                                                                                                                                                                                                                                                                                                                                                                                                                                                                                                                                                                                                                                                                                                                                                                                                                                                                                                                                                                                                                                                                                                                                                                                                                                                                                                                                                                                                                                                                                                                          |                                                                                                                                                                                                                                                                                                                                                                                                                                                                                                                                                                                                                                                                                                                                                                                                                                                                                                                                                                                                                                                                                                                                                                                                                                                                                                                                                                                                                                                                                                                                                                                                                                                                                                                                                                                                                                                                                                                                                                                                                                                                                                                                                                                                                                 |
|-----------|--------------------------------------------------------------------------------------------------------------------------------------------------------------------------------------------------------------------------------------------------------------------------------------------------------------------------------------------------------------------------------------------------------------------------------------------------------------------------------------------------------------------------------------------------------------------------------------------------------------------------------------------------------------------------------------------------------------------------------------------------------------------------------------------------------------------------------------------------------------------------------------------------------------------------------------------------------------------------------------------------------------------------------------------------------------------------------------------------------------------------------------------------------------------------------------------------------------------------------------------------------------------------------------------------------------------------------------------------------------------------------------------------------------------------------------------------------------------------------------------------------------------------------------------------------------------------------------------------------------------------------------------------------------------------------------------------------------------------------------------------------------------------------------------------------------------------------------------------------------------------------------------------------------------------------------------------------------------------------------------------------------------------------------------------------------------------------------------------------------------------------------------------------------------------------------------------------------------------------------------------------------------------------------------------------------------------------|------------------------------------------------------------------------------------------------------------------------------------------------------------------------------------------------------------------------------------------------------------------------------------------------------------------------------------------------------------------------------------------------------------------------------------------------------------------------------------------------------------------------------------------------------------------------------------------------------------------------------------------------------------------------------------------------------------------------------------------------------------------------------------------------------------------------------------------------------------------------------------------------------------------------------------------------------------------------------------------------------------------------------------------------------------------------------------------------------------------------------------------------------------------------------------------------------------------------------------------------------------------------------------------------------------------------------------------------------------------------------------------------------------------------------------------------------------------------------------------------------------------------------------------------------------------------------------------------------------------------------------------------------------------------------------------------------------------------------------------------------------------------------------------------------------------------------------------------------------------------------------------------------------------------------------------------------------------------------------------------------------------------------------------------------------------------------------------------------------------------------------------------------------------------------------------------------------------------------------------------------------------------------------------------------------------------------------------------------------------------------------------------------------------------------------------------------------------------------------------------------------------------------------------|---------------------------------------------------------------------------------------------------------------------------------------------------------------------------------------------------------------------------------------------------------------------------------------------------------------------------------------------------------------------------------------------------------------------------------------------------------------------------------------------------------------------------------------------------------------------------------------------------------------------------------------------------------------------------------------------------------------------------------------------------------------------------------------------------------------------------------------------------------------------------------------------------------------------------------------------------------------------------------------------------------------------------------------------------------------------------------------------------------------------------------------------------------------------------------------------------------------------------------------------------------------------------------------------------------------------------------------------------------------------------------------------------------------------------------------------------------------------------------------------------------------------------------------------------------------------------------------------------------------------------------------------------------------------------------------------------------------------------------------------------------------------------------------------------------------------------------------------------------------------------------------------------------------------------------------------------------------------------------------------------------------------------------------------------------------------------------------------------------------------------------------------------------------------------------------------------------------------------------|
| <p>Q6</p> | <p>Yes, cancer can damage the immune system in various ways. The relationship between cancer and the immune system is complex and multifaceted. While the immune system plays a crucial role in recognizing and eliminating cancer cells, cancer can develop mechanisms to evade or suppress the immune response, leading to immune dysfunction.</p> <p>Here are some ways in which cancer can impact the immune system:</p> <ol style="list-style-type: none"> <li>1. Immune suppression: Some cancer types can produce immunosuppressive substances or alter the local tumor microenvironment, creating an immunosuppressive environment. This can weaken the immune response against the cancer cells.</li> <li>2. Tumor-induced immune tolerance: Cancer cells can express molecules or antigens that resemble normal cells, making it difficult for the immune system to distinguish them from healthy cells. This immune tolerance allows cancer cells to evade immune recognition and destruction.</li> <li>3. Exhaustion of immune cells: Prolonged exposure to cancer cells can lead to the functional exhaustion of immune cells, particularly T cells. Exhausted T cells become less effective in recognizing and attacking cancer cells.</li> <li>4. Suppression of immune checkpoints: Cancer cells can upregulate the expression of immune checkpoint molecules, such as PD-L1, which interact with immune checkpoint receptors like PD-1 on T cells. This interaction can inhibit T cell activity and dampen the immune response against the tumor.</li> <li>5. Bone marrow suppression: Some cancers can affect the bone marrow, where immune cells are produced, leading to a decrease in the production and functionality of immune cells.</li> </ol> <p>It's important to note that cancer-related immune dysfunction can vary depending on the type and stage of cancer, as well as individual variations. Additionally, the immune system's response to cancer is complex and can involve both pro-tumor and anti-tumor immune responses.</p> <p>Understanding and modulating the interactions between cancer and the immune system is an active area of research in developing effective immunotherapies and combination treatments that can harness and enhance the immune response against cancer.</p> | <p>Yes, cancer can damage the immune system in various ways. The relationship between cancer and the immune system is complex and can involve both the direct impact of the tumor on immune cells and indirect effects related to systemic inflammation and immune suppression.</p> <p>Here are some ways in which cancer can damage the immune system:</p> <ol style="list-style-type: none"> <li>1. Immune Suppression: Cancer cells can produce factors that suppress or inhibit immune responses. These factors may impair the functioning of immune cells, including T cells, natural killer (NK) cells, and antigen-presenting cells (APCs), weakening the immune system's ability to recognize and eliminate cancer cells.</li> <li>2. Tumor-Induced Immune Tolerance: Cancer cells can develop mechanisms to evade the immune system by expressing molecules or antigens that resemble normal cells, making it difficult for immune cells to recognize them as foreign. This immune tolerance allows cancer cells to escape immune surveillance and continue to grow.</li> <li>3. Immune Checkpoint Activation: Some cancers can exploit the immune checkpoint pathways, such as PD-1/PD-L1 or CTLA-4, to inhibit immune responses. Cancer cells may upregulate immune checkpoint ligands, which interact with receptors on immune cells, leading to immune suppression and allowing the tumor to evade immune attack.</li> <li>4. Systemic Inflammation: Cancer can trigger chronic inflammation, which can lead to immune dysfunction. Inflammatory signals produced by the tumor microenvironment can alter immune cell functions and impair their ability to mount effective immune responses.</li> <li>5. Bone Marrow Suppression: Certain cancers, such as leukemia or metastatic bone cancer, can invade or damage the bone marrow, where immune cells are produced. This can lead to a decrease in the production and functionality of immune cells, weakening the immune system.</li> </ol> <p>It's important to note that the extent of immune system damage can vary depending on the type and stage of cancer, as well as individual factors. Additionally, cancer treatment modalities, such as chemotherapy or radiation therapy, can also impact the immune system to some degree.</p> <p>Understanding the interplay between cancer and the immune system is crucial for developing effective cancer treatments, such as immunotherapies, that can restore or enhance immune responses against cancer cells.</p> | <p>Cancer can indeed have detrimental effects on the immune system. The impact can vary depending on the type and stage of cancer, as well as individual factors. Here are some ways in which cancer can damage the immune system:</p> <ol style="list-style-type: none"> <li>1. Immune Suppression: Some cancer types release substances that suppress the immune system. These substances can inhibit the function and response of immune cells, such as T cells, B cells, and natural killer (NK) cells, compromising the body's ability to recognize and attack cancer cells effectively.</li> <li>2. Tumor-Induced Immune Tolerance: Cancer cells can develop mechanisms to evade the immune system by expressing molecules or antigens that resemble normal cells. This can confuse or deceive the immune system, preventing it from recognizing cancer cells as foreign or dangerous. As a result, cancer cells can evade immune surveillance and continue to grow.</li> <li>3. Immune Checkpoint Activation: Cancer cells may upregulate certain proteins or ligands that interact with immune checkpoint receptors, such as PD-1 or CTLA-4, leading to immune suppression. This can prevent immune cells from mounting an effective response against the tumor.</li> <li>4. Bone Marrow Suppression: Some cancers can invade or affect the bone marrow, where immune cells are produced. This can disrupt the normal production of immune cells, leading to a decrease in the number and functionality of immune cells in the body.</li> <li>5. Systemic Effects: Advanced or metastatic cancer can produce systemic effects that impact the immune system. For example, cancer-related inflammation or the release of tumor-derived factors can contribute to immune dysfunction and suppression.</li> </ol> <p>These immune system alterations caused by cancer can weaken the body's ability to control and eliminate cancer cells, allowing tumors to grow and spread more easily. Understanding these interactions between cancer and the immune system is crucial for developing effective cancer treatments, such as immunotherapies, that aim to restore or enhance immune responses against cancer cells.</p> |
|-----------|--------------------------------------------------------------------------------------------------------------------------------------------------------------------------------------------------------------------------------------------------------------------------------------------------------------------------------------------------------------------------------------------------------------------------------------------------------------------------------------------------------------------------------------------------------------------------------------------------------------------------------------------------------------------------------------------------------------------------------------------------------------------------------------------------------------------------------------------------------------------------------------------------------------------------------------------------------------------------------------------------------------------------------------------------------------------------------------------------------------------------------------------------------------------------------------------------------------------------------------------------------------------------------------------------------------------------------------------------------------------------------------------------------------------------------------------------------------------------------------------------------------------------------------------------------------------------------------------------------------------------------------------------------------------------------------------------------------------------------------------------------------------------------------------------------------------------------------------------------------------------------------------------------------------------------------------------------------------------------------------------------------------------------------------------------------------------------------------------------------------------------------------------------------------------------------------------------------------------------------------------------------------------------------------------------------------------------|------------------------------------------------------------------------------------------------------------------------------------------------------------------------------------------------------------------------------------------------------------------------------------------------------------------------------------------------------------------------------------------------------------------------------------------------------------------------------------------------------------------------------------------------------------------------------------------------------------------------------------------------------------------------------------------------------------------------------------------------------------------------------------------------------------------------------------------------------------------------------------------------------------------------------------------------------------------------------------------------------------------------------------------------------------------------------------------------------------------------------------------------------------------------------------------------------------------------------------------------------------------------------------------------------------------------------------------------------------------------------------------------------------------------------------------------------------------------------------------------------------------------------------------------------------------------------------------------------------------------------------------------------------------------------------------------------------------------------------------------------------------------------------------------------------------------------------------------------------------------------------------------------------------------------------------------------------------------------------------------------------------------------------------------------------------------------------------------------------------------------------------------------------------------------------------------------------------------------------------------------------------------------------------------------------------------------------------------------------------------------------------------------------------------------------------------------------------------------------------------------------------------------------------|---------------------------------------------------------------------------------------------------------------------------------------------------------------------------------------------------------------------------------------------------------------------------------------------------------------------------------------------------------------------------------------------------------------------------------------------------------------------------------------------------------------------------------------------------------------------------------------------------------------------------------------------------------------------------------------------------------------------------------------------------------------------------------------------------------------------------------------------------------------------------------------------------------------------------------------------------------------------------------------------------------------------------------------------------------------------------------------------------------------------------------------------------------------------------------------------------------------------------------------------------------------------------------------------------------------------------------------------------------------------------------------------------------------------------------------------------------------------------------------------------------------------------------------------------------------------------------------------------------------------------------------------------------------------------------------------------------------------------------------------------------------------------------------------------------------------------------------------------------------------------------------------------------------------------------------------------------------------------------------------------------------------------------------------------------------------------------------------------------------------------------------------------------------------------------------------------------------------------------|

|           |                                                                                                                                                                                                                                                                                                                                                                                                                                                                                                                                                                                                                                                                                                                                                                                                                                                                                                                                                                                                                                                                                                                                                                                                                                                                                                                                                                                                                                                                                                                                                                                                                                                                                                                                                                                                                                                                                                                                                                                                                                             |                                                                                                                                                                                                                                                                                                                                                                                                                                                                                                                                                                                                                                                                                                                                                                                                                                                                                                                                                                                                                                                                                                                                                                                                                                                                                                                                                                                                                                                                                                                                                                                                                                                                                                                                                                                                                                                                                                 |                                                                                                                                                                                                                                                                                                                                                                                                                                                                                                                                                                                                                                                                                                                                                                                                                                                                                                                                                                                                                                                                                                                                                                                                                                                                                                                                                                                                                                                                                                                                                                                                                                                                                                                                                                                                                                                                      |
|-----------|---------------------------------------------------------------------------------------------------------------------------------------------------------------------------------------------------------------------------------------------------------------------------------------------------------------------------------------------------------------------------------------------------------------------------------------------------------------------------------------------------------------------------------------------------------------------------------------------------------------------------------------------------------------------------------------------------------------------------------------------------------------------------------------------------------------------------------------------------------------------------------------------------------------------------------------------------------------------------------------------------------------------------------------------------------------------------------------------------------------------------------------------------------------------------------------------------------------------------------------------------------------------------------------------------------------------------------------------------------------------------------------------------------------------------------------------------------------------------------------------------------------------------------------------------------------------------------------------------------------------------------------------------------------------------------------------------------------------------------------------------------------------------------------------------------------------------------------------------------------------------------------------------------------------------------------------------------------------------------------------------------------------------------------------|-------------------------------------------------------------------------------------------------------------------------------------------------------------------------------------------------------------------------------------------------------------------------------------------------------------------------------------------------------------------------------------------------------------------------------------------------------------------------------------------------------------------------------------------------------------------------------------------------------------------------------------------------------------------------------------------------------------------------------------------------------------------------------------------------------------------------------------------------------------------------------------------------------------------------------------------------------------------------------------------------------------------------------------------------------------------------------------------------------------------------------------------------------------------------------------------------------------------------------------------------------------------------------------------------------------------------------------------------------------------------------------------------------------------------------------------------------------------------------------------------------------------------------------------------------------------------------------------------------------------------------------------------------------------------------------------------------------------------------------------------------------------------------------------------------------------------------------------------------------------------------------------------|----------------------------------------------------------------------------------------------------------------------------------------------------------------------------------------------------------------------------------------------------------------------------------------------------------------------------------------------------------------------------------------------------------------------------------------------------------------------------------------------------------------------------------------------------------------------------------------------------------------------------------------------------------------------------------------------------------------------------------------------------------------------------------------------------------------------------------------------------------------------------------------------------------------------------------------------------------------------------------------------------------------------------------------------------------------------------------------------------------------------------------------------------------------------------------------------------------------------------------------------------------------------------------------------------------------------------------------------------------------------------------------------------------------------------------------------------------------------------------------------------------------------------------------------------------------------------------------------------------------------------------------------------------------------------------------------------------------------------------------------------------------------------------------------------------------------------------------------------------------------|
| <p>Q7</p> | <p>Anti-PD-1 and anti-PD-L1 treatments are both types of immunotherapy that target the programmed cell death protein 1 (PD-1) pathway, but they differ in their mechanism of action and the specific molecule they target.</p> <p>Anti-PD-1 treatment: Anti-PD-1 drugs, such as pembrolizumab (Keytruda) and nivolumab (Opdivo), target and block the PD-1 receptor on immune cells, particularly T cells. By blocking PD-1, these drugs prevent the interaction between PD-1 and its ligands (PD-L1 and PD-L2), which are often expressed on cancer cells and other cells in the tumor microenvironment. This blockade releases the "brakes" on the immune system, allowing activated T cells to recognize and attack cancer cells more effectively.</p> <p>Anti-PD-L1 treatment: Anti-PD-L1 drugs, such as atezolizumab (Tecentriq) and durvalumab (Imfinzi), target and block the PD-L1 ligand found on both cancer cells and certain immune cells. By blocking PD-L1, these drugs prevent the interaction between PD-L1 and its receptors, including PD-1, on T cells. This blockade also helps to restore and enhance the immune response against cancer cells.</p> <p>The key difference between anti-PD-1 and anti-PD-L1 treatments lies in the specific molecule being targeted. Anti-PD-1 drugs target the receptor on immune cells, while anti-PD-L1 drugs target the ligand expressed on cancer cells and immune cells. However, both treatments aim to achieve a similar outcome by inhibiting the interaction between PD-1 and PD-L1, thereby enhancing the anti-tumor immune response.</p> <p>It's important to note that the choice between anti-PD-1 and anti-PD-L1 treatments depends on several factors, including the type of cancer, the specific drug approved for that indication, and individual patient characteristics. Each treatment may have its own efficacy, safety profile, and approved indications, which should be evaluated by healthcare professionals in the context of an individual's situation.</p> | <p>The difference between anti-PD-1 and anti-PD-L1 treatments lies in the specific target of the drugs within the programmed cell death protein 1 (PD-1) pathway.</p> <p>Anti-PD-1 treatment: Anti-PD-1 drugs, such as pembrolizumab (Keytruda) and nivolumab (Opdivo), directly target and block the PD-1 receptor on immune cells, particularly T cells. PD-1 is a checkpoint molecule that downregulates the immune response when it interacts with its ligands, PD-L1 and PD-L2, which are often expressed on cancer cells and other cells in the tumor microenvironment. By blocking PD-1, anti-PD-1 drugs prevent this interaction and enable immune cells to mount a stronger anti-tumor immune response.</p> <p>Anti-PD-L1 treatment: Anti-PD-L1 drugs, such as atezolizumab (Tecentriq) and durvalumab (Imfinzi), target and block the PD-L1 ligand. PD-L1 is expressed on both cancer cells and certain immune cells. When PD-L1 binds to PD-1 on T cells, it inhibits the immune response. By blocking PD-L1, anti-PD-L1 drugs prevent the immune checkpoint interaction and help restore the immune system's ability to recognize and attack cancer cells.</p> <p>In summary, anti-PD-1 drugs target and block the receptor PD-1 on immune cells, while anti-PD-L1 drugs target and block the ligand PD-L1 found on cancer cells and some immune cells. Both types of treatments aim to release the brakes on the immune system, allowing for a more effective immune response against cancer cells.</p> <p>It's important to note that the choice between anti-PD-1 and anti-PD-L1 treatments depends on various factors, including the specific cancer type, the approved indications for each drug, and individual patient characteristics. The selection of the most suitable treatment is made by healthcare professionals based on these factors and clinical guidelines.</p> | <p>Anti-PD-1 and anti-PD-L1 treatments are both types of immunotherapies that target the programmed cell death protein 1 (PD-1) pathway, but they differ in their specific targets within this pathway.</p> <p>Anti-PD-1 treatment: Anti-PD-1 drugs, such as pembrolizumab (Keytruda) and nivolumab (Opdivo), directly target and block the PD-1 receptor on immune cells, particularly T cells. By blocking PD-1, these drugs prevent the interaction between PD-1 and its ligands (PD-L1 and PD-L2), which are often expressed on cancer cells and other cells in the tumor microenvironment. This blockade helps to restore and enhance the immune response against cancer cells.</p> <p>Anti-PD-L1 treatment: Anti-PD-L1 drugs, such as atezolizumab (Tecentriq) and durvalumab (Imfinzi), directly target and block the PD-L1 ligand expressed on cancer cells and certain immune cells. When PD-L1 binds to PD-1 on T cells, it inhibits the immune response and allows cancer cells to evade immune detection. By blocking PD-L1, these drugs disrupt the interaction between PD-L1 and PD-1, enabling the immune system to mount a stronger anti-tumor response.</p> <p>In summary, anti-PD-1 treatments focus on blocking the PD-1 receptor on immune cells, while anti-PD-L1 treatments aim to block the PD-L1 ligand expressed on cancer cells and immune cells. Both types of treatment aim to release the brakes on the immune system and enhance the immune response against cancer cells.</p> <p>It's important to note that the choice between anti-PD-1 and anti-PD-L1 treatments depends on several factors, including the specific cancer type, the approved indications for each drug, and individual patient characteristics. Healthcare professionals consider these factors to determine the most appropriate treatment for each patient.</p> |
|-----------|---------------------------------------------------------------------------------------------------------------------------------------------------------------------------------------------------------------------------------------------------------------------------------------------------------------------------------------------------------------------------------------------------------------------------------------------------------------------------------------------------------------------------------------------------------------------------------------------------------------------------------------------------------------------------------------------------------------------------------------------------------------------------------------------------------------------------------------------------------------------------------------------------------------------------------------------------------------------------------------------------------------------------------------------------------------------------------------------------------------------------------------------------------------------------------------------------------------------------------------------------------------------------------------------------------------------------------------------------------------------------------------------------------------------------------------------------------------------------------------------------------------------------------------------------------------------------------------------------------------------------------------------------------------------------------------------------------------------------------------------------------------------------------------------------------------------------------------------------------------------------------------------------------------------------------------------------------------------------------------------------------------------------------------------|-------------------------------------------------------------------------------------------------------------------------------------------------------------------------------------------------------------------------------------------------------------------------------------------------------------------------------------------------------------------------------------------------------------------------------------------------------------------------------------------------------------------------------------------------------------------------------------------------------------------------------------------------------------------------------------------------------------------------------------------------------------------------------------------------------------------------------------------------------------------------------------------------------------------------------------------------------------------------------------------------------------------------------------------------------------------------------------------------------------------------------------------------------------------------------------------------------------------------------------------------------------------------------------------------------------------------------------------------------------------------------------------------------------------------------------------------------------------------------------------------------------------------------------------------------------------------------------------------------------------------------------------------------------------------------------------------------------------------------------------------------------------------------------------------------------------------------------------------------------------------------------------------|----------------------------------------------------------------------------------------------------------------------------------------------------------------------------------------------------------------------------------------------------------------------------------------------------------------------------------------------------------------------------------------------------------------------------------------------------------------------------------------------------------------------------------------------------------------------------------------------------------------------------------------------------------------------------------------------------------------------------------------------------------------------------------------------------------------------------------------------------------------------------------------------------------------------------------------------------------------------------------------------------------------------------------------------------------------------------------------------------------------------------------------------------------------------------------------------------------------------------------------------------------------------------------------------------------------------------------------------------------------------------------------------------------------------------------------------------------------------------------------------------------------------------------------------------------------------------------------------------------------------------------------------------------------------------------------------------------------------------------------------------------------------------------------------------------------------------------------------------------------------|



|           |                                                                                                                                                                                                                                                                                                                                                                                                                                                                                                                                                                                                                                                                                                                                                                                                                                                                                                                                                                                                                                                                                                                                                                                                                                                                                                                                                                                                                                                                                                                                                                                                                                                                                                                                                                                                                                                                                                                                                                                                                                                                                                                                                                                                                                                                                                                                                                                                             |                                                                                                                                                                                                                                                                                                                                                                                                                                                                                                                                                                                                                                                                                                                                                                                                                                                                                                                                                                                                                                                                                                                                                                                                                                                                                                                                                                                                                                                                                                                                                                                                                                                                                                                                                                                                                                                                                                                                                                                                                                                                                                                                                                                                                                                                                                                                                                                                                                                                                                                                                                                                                                                                                                                                                   |                                                                                                                                                                                                                                                                                                                                                                                                                                                                                                                                                                                                                                                                                                                                                                                                                                                                                                                                                                                                                                                                                                                                                                                                                                                                                                                                                                                                                                                                                                                                                                                                                                                                                                                                                                                                                                                                                                                                                                                                                                                                                                                                                                                                                                                                                                                                                                                                                                                                                                                                                                           |
|-----------|-------------------------------------------------------------------------------------------------------------------------------------------------------------------------------------------------------------------------------------------------------------------------------------------------------------------------------------------------------------------------------------------------------------------------------------------------------------------------------------------------------------------------------------------------------------------------------------------------------------------------------------------------------------------------------------------------------------------------------------------------------------------------------------------------------------------------------------------------------------------------------------------------------------------------------------------------------------------------------------------------------------------------------------------------------------------------------------------------------------------------------------------------------------------------------------------------------------------------------------------------------------------------------------------------------------------------------------------------------------------------------------------------------------------------------------------------------------------------------------------------------------------------------------------------------------------------------------------------------------------------------------------------------------------------------------------------------------------------------------------------------------------------------------------------------------------------------------------------------------------------------------------------------------------------------------------------------------------------------------------------------------------------------------------------------------------------------------------------------------------------------------------------------------------------------------------------------------------------------------------------------------------------------------------------------------------------------------------------------------------------------------------------------------|---------------------------------------------------------------------------------------------------------------------------------------------------------------------------------------------------------------------------------------------------------------------------------------------------------------------------------------------------------------------------------------------------------------------------------------------------------------------------------------------------------------------------------------------------------------------------------------------------------------------------------------------------------------------------------------------------------------------------------------------------------------------------------------------------------------------------------------------------------------------------------------------------------------------------------------------------------------------------------------------------------------------------------------------------------------------------------------------------------------------------------------------------------------------------------------------------------------------------------------------------------------------------------------------------------------------------------------------------------------------------------------------------------------------------------------------------------------------------------------------------------------------------------------------------------------------------------------------------------------------------------------------------------------------------------------------------------------------------------------------------------------------------------------------------------------------------------------------------------------------------------------------------------------------------------------------------------------------------------------------------------------------------------------------------------------------------------------------------------------------------------------------------------------------------------------------------------------------------------------------------------------------------------------------------------------------------------------------------------------------------------------------------------------------------------------------------------------------------------------------------------------------------------------------------------------------------------------------------------------------------------------------------------------------------------------------------------------------------------------------------|---------------------------------------------------------------------------------------------------------------------------------------------------------------------------------------------------------------------------------------------------------------------------------------------------------------------------------------------------------------------------------------------------------------------------------------------------------------------------------------------------------------------------------------------------------------------------------------------------------------------------------------------------------------------------------------------------------------------------------------------------------------------------------------------------------------------------------------------------------------------------------------------------------------------------------------------------------------------------------------------------------------------------------------------------------------------------------------------------------------------------------------------------------------------------------------------------------------------------------------------------------------------------------------------------------------------------------------------------------------------------------------------------------------------------------------------------------------------------------------------------------------------------------------------------------------------------------------------------------------------------------------------------------------------------------------------------------------------------------------------------------------------------------------------------------------------------------------------------------------------------------------------------------------------------------------------------------------------------------------------------------------------------------------------------------------------------------------------------------------------------------------------------------------------------------------------------------------------------------------------------------------------------------------------------------------------------------------------------------------------------------------------------------------------------------------------------------------------------------------------------------------------------------------------------------------------------|
| <p>Q8</p> | <p>The immune system has mechanisms in place to recognize and respond to cancer cells. Here are some ways the immune system recognizes cancer:</p> <ol style="list-style-type: none"> <li>1. Antigen Presentation: Cancer cells can display abnormal proteins or antigens on their surface that can be recognized as foreign by immune cells. Antigen-presenting cells (APCs) such as dendritic cells engulf cancer cell debris, process it, and present cancer cell antigens on their surface. This alerts other immune cells, especially T cells, to recognize and respond to the cancer cells.</li> <li>2. Tumor-Infiltrating Lymphocytes (TILs): T cells, B cells, and natural killer (NK) cells can infiltrate tumors and recognize cancer cells through their surface antigens. Tumor-infiltrating lymphocytes (TILs) play a role in recognizing and targeting cancer cells for destruction.</li> <li>3. T Cell Receptors: T cells have receptors on their surface called T cell receptors (TCRs), which can recognize specific antigens presented by cancer cells. When a TCR recognizes a cancer cell antigen, it triggers an immune response against the cancer cells.</li> <li>4. Natural Killer Cells: Natural killer (NK) cells are a type of immune cell that can recognize and kill cancer cells directly, even without prior sensitization. NK cells can identify cancer cells by detecting changes in surface molecules or loss of normal self-markers on the cancer cells.</li> <li>5. Immune Checkpoints: Immune checkpoints are regulatory pathways that prevent excessive immune responses and maintain self-tolerance. However, some cancer cells can exploit these checkpoints to evade immune recognition and destruction. Immune checkpoint inhibitors, such as anti-PD-1 or anti-PD-L1 drugs, help restore the immune response against cancer by blocking the inhibitory signals and enhancing immune recognition.</li> </ol> <p>It's important to note that cancer cells can develop mechanisms to evade immune detection, such as downregulating tumor antigens, suppressing immune responses, or creating an immunosuppressive microenvironment. However, the immune system has evolved intricate mechanisms to recognize and respond to cancer cells. Harnessing and enhancing these immune responses are the basis for many immunotherapy approaches in cancer treatment.</p> | <p>The immune system recognizes cancer through a process called immune surveillance, which involves various mechanisms to detect and respond to abnormal cells, including cancer cells. Here are some key ways the immune system recognizes cancer:</p> <ol style="list-style-type: none"> <li>1. Antigen Presentation: Cancer cells can display specific proteins or antigens on their surface that are different from normal cells. Antigen-presenting cells (APCs), such as dendritic cells, engulf cancer cell fragments and present cancer cell antigens on their surface. This alerts other immune cells, especially T cells, to recognize and respond to the cancer cells.</li> <li>2. Tumor-Specific Antigens: Some cancer cells produce unique proteins or mutated versions of normal proteins, known as tumor-specific antigens (TSAs). These TSAs can be recognized as foreign by the immune system. T cells, especially cytotoxic T lymphocytes (CTLs), can recognize these antigens and target cancer cells for destruction.</li> <li>3. T Cell Receptors: T cells have receptors on their surface called T cell receptors (TCRs). These receptors can recognize specific antigens presented by cancer cells through major histocompatibility complex (MHC) molecules. When TCRs bind to cancer cell antigens, they trigger an immune response, leading to the destruction of the cancer cells.</li> <li>4. Natural Killer (NK) Cells: NK cells are a type of immune cell that can recognize and directly kill cancer cells. NK cells detect changes in the expression of surface molecules on cancer cells, such as the downregulation of MHC molecules or the upregulation of stress-induced ligands. These changes can activate NK cells to destroy the cancer cells.</li> <li>5. Immune Checkpoints: Immune checkpoints are regulatory pathways that prevent excessive immune responses and maintain self-tolerance. However, some cancer cells can exploit these checkpoints by expressing immune checkpoint proteins, such as PD-L1, which interact with immune checkpoint receptors on T cells, leading to immune suppression. Immune checkpoint inhibitors, such as anti-PD-1 or anti-PD-L1 drugs, help to block these inhibitory signals and enhance the immune response against cancer cells.</li> </ol> <p>It's important to note that the immune system's recognition of cancer cells can be influenced by various factors, including the type and stage of cancer, the specific antigens expressed by the cancer cells, and the overall immune status of the individual. Immunotherapy approaches aim to enhance the immune system's ability to recognize and destroy cancer cells and restore immune surveillance.</p> | <p>The immune system has several mechanisms to recognize and respond to cancer cells. Here are the key ways the immune system recognizes cancer:</p> <ol style="list-style-type: none"> <li>1. Antigen Recognition: Cancer cells can display unique proteins or antigens on their surface that are different from normal cells. These cancer-associated antigens can be recognized as foreign by immune cells. Antigen-presenting cells (APCs), such as dendritic cells, engulf cancer cell fragments and present cancer-specific antigens to T cells, triggering an immune response.</li> <li>2. T Cell Recognition: T cells, particularly cytotoxic T cells (CD8+ T cells), can recognize cancer cells through specific receptors called T cell receptors (TCRs). TCRs can bind to cancer cell antigens presented on major histocompatibility complex (MHC) molecules. This recognition activates T cells to mount an immune response against the cancer cells.</li> <li>3. Natural Killer (NK) Cell Recognition: Natural killer (NK) cells can recognize and kill cancer cells directly, even without prior sensitization. NK cells detect changes in the expression of surface molecules on cancer cells, such as decreased MHC class I molecules or upregulation of stress-induced ligands. These changes signal NK cells to attack and destroy the cancer cells.</li> <li>4. Immune Checkpoints: Immune checkpoint molecules, such as programmed cell death protein 1 (PD-1) and cytotoxic T-lymphocyte-associated protein 4 (CTLA-4), regulate immune responses. Cancer cells can hijack these checkpoints by expressing ligands like PD-L1, which interact with checkpoint receptors on immune cells, inhibiting the immune response. Immune checkpoint inhibitors, such as anti-PD-1 or anti-PD-L1 antibodies, help unleash the immune response against cancer by blocking these inhibitory signals.</li> <li>5. Tumor-Infiltrating Lymphocytes (TILs): Immune cells, including T cells and B cells, can infiltrate tumors. These tumor-infiltrating lymphocytes (TILs) can recognize cancer cells through their specific antigen receptors and mount an immune response against the tumor.</li> </ol> <p>It's important to note that cancer cells can develop mechanisms to evade immune recognition, such as downregulating tumor antigens or creating an immunosuppressive microenvironment. However, the immune system is continuously surveilling for abnormal cells, and enhancing immune responses against cancer is a focus of cancer immunotherapy.</p> |
|-----------|-------------------------------------------------------------------------------------------------------------------------------------------------------------------------------------------------------------------------------------------------------------------------------------------------------------------------------------------------------------------------------------------------------------------------------------------------------------------------------------------------------------------------------------------------------------------------------------------------------------------------------------------------------------------------------------------------------------------------------------------------------------------------------------------------------------------------------------------------------------------------------------------------------------------------------------------------------------------------------------------------------------------------------------------------------------------------------------------------------------------------------------------------------------------------------------------------------------------------------------------------------------------------------------------------------------------------------------------------------------------------------------------------------------------------------------------------------------------------------------------------------------------------------------------------------------------------------------------------------------------------------------------------------------------------------------------------------------------------------------------------------------------------------------------------------------------------------------------------------------------------------------------------------------------------------------------------------------------------------------------------------------------------------------------------------------------------------------------------------------------------------------------------------------------------------------------------------------------------------------------------------------------------------------------------------------------------------------------------------------------------------------------------------------|---------------------------------------------------------------------------------------------------------------------------------------------------------------------------------------------------------------------------------------------------------------------------------------------------------------------------------------------------------------------------------------------------------------------------------------------------------------------------------------------------------------------------------------------------------------------------------------------------------------------------------------------------------------------------------------------------------------------------------------------------------------------------------------------------------------------------------------------------------------------------------------------------------------------------------------------------------------------------------------------------------------------------------------------------------------------------------------------------------------------------------------------------------------------------------------------------------------------------------------------------------------------------------------------------------------------------------------------------------------------------------------------------------------------------------------------------------------------------------------------------------------------------------------------------------------------------------------------------------------------------------------------------------------------------------------------------------------------------------------------------------------------------------------------------------------------------------------------------------------------------------------------------------------------------------------------------------------------------------------------------------------------------------------------------------------------------------------------------------------------------------------------------------------------------------------------------------------------------------------------------------------------------------------------------------------------------------------------------------------------------------------------------------------------------------------------------------------------------------------------------------------------------------------------------------------------------------------------------------------------------------------------------------------------------------------------------------------------------------------------------|---------------------------------------------------------------------------------------------------------------------------------------------------------------------------------------------------------------------------------------------------------------------------------------------------------------------------------------------------------------------------------------------------------------------------------------------------------------------------------------------------------------------------------------------------------------------------------------------------------------------------------------------------------------------------------------------------------------------------------------------------------------------------------------------------------------------------------------------------------------------------------------------------------------------------------------------------------------------------------------------------------------------------------------------------------------------------------------------------------------------------------------------------------------------------------------------------------------------------------------------------------------------------------------------------------------------------------------------------------------------------------------------------------------------------------------------------------------------------------------------------------------------------------------------------------------------------------------------------------------------------------------------------------------------------------------------------------------------------------------------------------------------------------------------------------------------------------------------------------------------------------------------------------------------------------------------------------------------------------------------------------------------------------------------------------------------------------------------------------------------------------------------------------------------------------------------------------------------------------------------------------------------------------------------------------------------------------------------------------------------------------------------------------------------------------------------------------------------------------------------------------------------------------------------------------------------------|

|           |                                                                                                                                                                                                                                                                                                                                                                                                                                                                                                                                                                                                                                                                                                                                                                                                                                                                                                                                                                                                                                                                                                                                                                                                                                                                                                                                                                                                                                                                                                                                                                                                                                                                                                                                                                                                                                                                                                                                                                            |                                                                                                                                                                                                                                                                                                                                                                                                                                                                                                                                                                                                                                                                                                                                                                                                                                                                                                                                                                                                                                                                                                                                                                                                                                                                                                                                                                                                                                                                                                                                                                                                                                                                                                                                                                                                                                                                                                                                                                                                                                    |                                                                                                                                                                                                                                                                                                                                                                                                                                                                                                                                                                                                                                                                                                                                                                                                                                                                                                                                                                                                                                                                                                                                                                                                                                                                                                                                                                                                                                                                                                                                                                                                                                                                                                                                            |
|-----------|----------------------------------------------------------------------------------------------------------------------------------------------------------------------------------------------------------------------------------------------------------------------------------------------------------------------------------------------------------------------------------------------------------------------------------------------------------------------------------------------------------------------------------------------------------------------------------------------------------------------------------------------------------------------------------------------------------------------------------------------------------------------------------------------------------------------------------------------------------------------------------------------------------------------------------------------------------------------------------------------------------------------------------------------------------------------------------------------------------------------------------------------------------------------------------------------------------------------------------------------------------------------------------------------------------------------------------------------------------------------------------------------------------------------------------------------------------------------------------------------------------------------------------------------------------------------------------------------------------------------------------------------------------------------------------------------------------------------------------------------------------------------------------------------------------------------------------------------------------------------------------------------------------------------------------------------------------------------------|------------------------------------------------------------------------------------------------------------------------------------------------------------------------------------------------------------------------------------------------------------------------------------------------------------------------------------------------------------------------------------------------------------------------------------------------------------------------------------------------------------------------------------------------------------------------------------------------------------------------------------------------------------------------------------------------------------------------------------------------------------------------------------------------------------------------------------------------------------------------------------------------------------------------------------------------------------------------------------------------------------------------------------------------------------------------------------------------------------------------------------------------------------------------------------------------------------------------------------------------------------------------------------------------------------------------------------------------------------------------------------------------------------------------------------------------------------------------------------------------------------------------------------------------------------------------------------------------------------------------------------------------------------------------------------------------------------------------------------------------------------------------------------------------------------------------------------------------------------------------------------------------------------------------------------------------------------------------------------------------------------------------------------|--------------------------------------------------------------------------------------------------------------------------------------------------------------------------------------------------------------------------------------------------------------------------------------------------------------------------------------------------------------------------------------------------------------------------------------------------------------------------------------------------------------------------------------------------------------------------------------------------------------------------------------------------------------------------------------------------------------------------------------------------------------------------------------------------------------------------------------------------------------------------------------------------------------------------------------------------------------------------------------------------------------------------------------------------------------------------------------------------------------------------------------------------------------------------------------------------------------------------------------------------------------------------------------------------------------------------------------------------------------------------------------------------------------------------------------------------------------------------------------------------------------------------------------------------------------------------------------------------------------------------------------------------------------------------------------------------------------------------------------------|
| <p>Q9</p> | <p>Tremelimumab and durvalumab are both immune checkpoint inhibitors used in cancer treatment, but they target different molecules within the immune system.</p> <p>Tremelimumab: Tremelimumab is an antibody that targets cytotoxic T-lymphocyte-associated protein 4 (CTLA-4), an immune checkpoint receptor expressed on T cells. By binding to CTLA-4, tremelimumab blocks its inhibitory signals, allowing T cells to mount a stronger immune response against cancer cells. Tremelimumab is being investigated for its potential anti-tumor effects and is currently being studied in clinical trials for various types of cancer.</p> <p>Durvalumab: Durvalumab is an antibody that targets programmed cell death ligand 1 (PD-L1), a protein expressed on the surface of cancer cells and certain immune cells. PD-L1 binds to PD-1 receptors on T cells, delivering inhibitory signals that dampen the immune response. Durvalumab binds to PD-L1 and blocks this interaction, releasing the brakes on the immune system and allowing for a stronger immune response against cancer cells. Durvalumab has been approved for the treatment of certain types of lung cancer, bladder cancer, and other malignancies.</p> <p>It's worth noting that while tremelimumab and durvalumab are distinct drugs targeting different immune checkpoint pathways, they have been investigated in combination therapy in some clinical trials. The combination of anti-CTLA-4 and anti-PD-L1 therapies aims to enhance the anti-tumor immune response by targeting multiple immune checkpoints simultaneously.</p> <p>As with any cancer treatment, the use of tremelimumab, durvalumab, or combination therapies depends on several factors, including the specific cancer type, stage, and individual patient characteristics. The decision to use these medications is made by healthcare professionals based on clinical guidelines and the latest available evidence.</p> | <p>Tremelimumab and durvalumab are both immune checkpoint inhibitors used in cancer treatment, but they target different immune checkpoint molecules and have different approved indications.</p> <p>Tremelimumab: Tremelimumab is a monoclonal antibody that specifically targets cytotoxic T-lymphocyte-associated protein 4 (CTLA-4). CTLA-4 is a checkpoint receptor expressed on T cells that plays a role in regulating immune responses. By blocking CTLA-4, tremelimumab helps to unleash the immune system, allowing T cells to mount a more robust anti-tumor response. Tremelimumab has been studied in clinical trials for various types of cancer, including melanoma, mesothelioma, and lung cancer.</p> <p>Durvalumab: Durvalumab is a monoclonal antibody that targets programmed cell death ligand 1 (PD-L1), a protein expressed on cancer cells and certain immune cells. PD-L1 binds to PD-1 receptors on T cells, transmitting inhibitory signals and dampening the immune response against cancer cells. By blocking the PD-L1/PD-1 interaction, durvalumab helps to restore and enhance the immune response, leading to increased anti-tumor activity. Durvalumab has been approved for the treatment of certain types of lung cancer, bladder cancer, and other malignancies.</p> <p>While both tremelimumab and durvalumab are immune checkpoint inhibitors, they target different immune checkpoint pathways (CTLA-4 and PD-L1, respectively). However, it's worth noting that these drugs have been studied in combination therapy in certain clinical trials, aiming to further enhance the immune response by targeting multiple immune checkpoints simultaneously.</p> <p>The use of tremelimumab, durvalumab, or combination therapies depends on several factors, including the specific cancer type, stage, and individual patient characteristics. The decision to use these medications is made by healthcare professionals based on clinical guidelines and the latest available evidence.</p> | <p>Tremelimumab and durvalumab are both immune checkpoint inhibitors, but they target different immune checkpoints and have distinct approved indications.</p> <p>Tremelimumab: Tremelimumab is an antibody that targets cytotoxic T-lymphocyte-associated protein 4 (CTLA-4), a checkpoint receptor on T cells. By blocking CTLA-4, tremelimumab enhances the activity of T cells and promotes an immune response against cancer cells. It has been investigated in clinical trials for various types of cancer, including melanoma, lung cancer, and mesothelioma.</p> <p>Durvalumab: Durvalumab is an antibody that targets programmed cell death ligand 1 (PD-L1), a protein expressed on cancer cells and some immune cells. PD-L1 interacts with the PD-1 receptor on T cells, inhibiting their activity and allowing cancer cells to evade immune detection. By blocking the PD-L1/PD-1 interaction, durvalumab restores the immune response against cancer cells. It has been approved for the treatment of certain types of lung cancer, bladder cancer, and other malignancies.</p> <p>In summary, tremelimumab targets CTLA-4, while durvalumab targets PD-L1. They both aim to enhance the anti-tumor immune response but do so through different immune checkpoints. Additionally, durvalumab has received regulatory approval for specific cancer indications, while tremelimumab is still being studied in clinical trials.</p> <p>The choice between tremelimumab and durvalumab, or their combination, depends on factors such as the specific cancer type, stage, and individual patient characteristics. Healthcare professionals make treatment decisions based on clinical guidelines and the available evidence.</p> |
|-----------|----------------------------------------------------------------------------------------------------------------------------------------------------------------------------------------------------------------------------------------------------------------------------------------------------------------------------------------------------------------------------------------------------------------------------------------------------------------------------------------------------------------------------------------------------------------------------------------------------------------------------------------------------------------------------------------------------------------------------------------------------------------------------------------------------------------------------------------------------------------------------------------------------------------------------------------------------------------------------------------------------------------------------------------------------------------------------------------------------------------------------------------------------------------------------------------------------------------------------------------------------------------------------------------------------------------------------------------------------------------------------------------------------------------------------------------------------------------------------------------------------------------------------------------------------------------------------------------------------------------------------------------------------------------------------------------------------------------------------------------------------------------------------------------------------------------------------------------------------------------------------------------------------------------------------------------------------------------------------|------------------------------------------------------------------------------------------------------------------------------------------------------------------------------------------------------------------------------------------------------------------------------------------------------------------------------------------------------------------------------------------------------------------------------------------------------------------------------------------------------------------------------------------------------------------------------------------------------------------------------------------------------------------------------------------------------------------------------------------------------------------------------------------------------------------------------------------------------------------------------------------------------------------------------------------------------------------------------------------------------------------------------------------------------------------------------------------------------------------------------------------------------------------------------------------------------------------------------------------------------------------------------------------------------------------------------------------------------------------------------------------------------------------------------------------------------------------------------------------------------------------------------------------------------------------------------------------------------------------------------------------------------------------------------------------------------------------------------------------------------------------------------------------------------------------------------------------------------------------------------------------------------------------------------------------------------------------------------------------------------------------------------------|--------------------------------------------------------------------------------------------------------------------------------------------------------------------------------------------------------------------------------------------------------------------------------------------------------------------------------------------------------------------------------------------------------------------------------------------------------------------------------------------------------------------------------------------------------------------------------------------------------------------------------------------------------------------------------------------------------------------------------------------------------------------------------------------------------------------------------------------------------------------------------------------------------------------------------------------------------------------------------------------------------------------------------------------------------------------------------------------------------------------------------------------------------------------------------------------------------------------------------------------------------------------------------------------------------------------------------------------------------------------------------------------------------------------------------------------------------------------------------------------------------------------------------------------------------------------------------------------------------------------------------------------------------------------------------------------------------------------------------------------|

|                   |                                                                                                                                                                                                                                                                                                                                                                                                                                                                                                                                                                                                                                                                                                                                                                                                                                                                                                                                                                                                                                                                                                                                                                                                                                                                                                                                                                                                                                                                                                                                                                                                                                                                                                                                                                                                                                                                                                                                                                                                                                                                                                                                                                                                                                                 |                                                                                                                                                                                                                                                                                                                                                                                                                                                                                                                                                                                                                                                                                                                                                                                                                                                                                                                                                                                                                                                                                                                                                                                                                                                                                                                                                                                                                                                                                                                                                                                                                                                                                                                                                                                                                                                                                                                                                                                                                                                                                                                                                                                                                                                                                                                                                                                                                                                                                                                                                                               |                                                                                                                                                                                                                                                                                                                                                                                                                                                                                                                                                                                                                                                                                                                                                                                                                                                                                                                                                                                                                                                                                                                                                                                                                                                                                                                                                                                                                                                                                                                                                                                                                                                                                                                                                                                                                                                                                                                                                                                                                                                                                                                                                                                                                                                                                                                                                                                                                                                                    |
|-------------------|-------------------------------------------------------------------------------------------------------------------------------------------------------------------------------------------------------------------------------------------------------------------------------------------------------------------------------------------------------------------------------------------------------------------------------------------------------------------------------------------------------------------------------------------------------------------------------------------------------------------------------------------------------------------------------------------------------------------------------------------------------------------------------------------------------------------------------------------------------------------------------------------------------------------------------------------------------------------------------------------------------------------------------------------------------------------------------------------------------------------------------------------------------------------------------------------------------------------------------------------------------------------------------------------------------------------------------------------------------------------------------------------------------------------------------------------------------------------------------------------------------------------------------------------------------------------------------------------------------------------------------------------------------------------------------------------------------------------------------------------------------------------------------------------------------------------------------------------------------------------------------------------------------------------------------------------------------------------------------------------------------------------------------------------------------------------------------------------------------------------------------------------------------------------------------------------------------------------------------------------------|-------------------------------------------------------------------------------------------------------------------------------------------------------------------------------------------------------------------------------------------------------------------------------------------------------------------------------------------------------------------------------------------------------------------------------------------------------------------------------------------------------------------------------------------------------------------------------------------------------------------------------------------------------------------------------------------------------------------------------------------------------------------------------------------------------------------------------------------------------------------------------------------------------------------------------------------------------------------------------------------------------------------------------------------------------------------------------------------------------------------------------------------------------------------------------------------------------------------------------------------------------------------------------------------------------------------------------------------------------------------------------------------------------------------------------------------------------------------------------------------------------------------------------------------------------------------------------------------------------------------------------------------------------------------------------------------------------------------------------------------------------------------------------------------------------------------------------------------------------------------------------------------------------------------------------------------------------------------------------------------------------------------------------------------------------------------------------------------------------------------------------------------------------------------------------------------------------------------------------------------------------------------------------------------------------------------------------------------------------------------------------------------------------------------------------------------------------------------------------------------------------------------------------------------------------------------------------|--------------------------------------------------------------------------------------------------------------------------------------------------------------------------------------------------------------------------------------------------------------------------------------------------------------------------------------------------------------------------------------------------------------------------------------------------------------------------------------------------------------------------------------------------------------------------------------------------------------------------------------------------------------------------------------------------------------------------------------------------------------------------------------------------------------------------------------------------------------------------------------------------------------------------------------------------------------------------------------------------------------------------------------------------------------------------------------------------------------------------------------------------------------------------------------------------------------------------------------------------------------------------------------------------------------------------------------------------------------------------------------------------------------------------------------------------------------------------------------------------------------------------------------------------------------------------------------------------------------------------------------------------------------------------------------------------------------------------------------------------------------------------------------------------------------------------------------------------------------------------------------------------------------------------------------------------------------------------------------------------------------------------------------------------------------------------------------------------------------------------------------------------------------------------------------------------------------------------------------------------------------------------------------------------------------------------------------------------------------------------------------------------------------------------------------------------------------------|
| <p><b>Q10</b></p> | <p>Tumor-infiltrating lymphocyte (TIL) therapy is a form of immunotherapy that involves the extraction, expansion, and infusion of immune cells called T lymphocytes from a patient's own tumor tissue. TIL therapy aims to enhance the anti-tumor immune response by using the patient's own immune cells that have already infiltrated the tumor.</p> <p>The process of TIL therapy typically involves the following steps:</p> <ol style="list-style-type: none"> <li>1. Tumor Tissue Extraction: A sample of the patient's tumor tissue is surgically removed.</li> <li>2. TIL Isolation: The tumor tissue is processed in the laboratory to separate out the T lymphocytes that have infiltrated the tumor. These TILs are isolated and prepared for further processing.</li> <li>3. TIL Expansion: The isolated TILs are cultured and expanded in the laboratory to increase their numbers. This involves providing the TILs with growth factors and activating signals to stimulate their proliferation.</li> <li>4. Conditioning Regimen: Prior to TIL infusion, the patient may undergo a conditioning regimen, which may include chemotherapy or lymphodepleting treatments. This is done to reduce the population of existing immune cells and create a more favorable environment for the infused TILs to expand and function.</li> <li>5. TIL Infusion: The expanded TILs are then infused back into the patient's body, often along with an interleukin-2 (IL-2) cytokine treatment to further support their activation and survival.</li> </ol> <p>Once infused, the TILs travel to the tumor site and aim to recognize and attack cancer cells, contributing to an immune response against the cancer. TIL therapy is most commonly used for certain types of advanced or metastatic melanoma, but it is also being investigated in clinical trials for other solid tumor types.</p> <p>It's important to note that TIL therapy is a specialized and personalized treatment approach that requires expertise and specific laboratory capabilities. The use of TIL therapy is determined on a case-by-case basis, considering factors such as the patient's medical condition, tumor characteristics, and treatment options.</p> | <p>Tumor-infiltrating lymphocyte (TIL) therapy is a form of cancer immunotherapy that involves the isolation, expansion, and reinfusion of immune cells called T lymphocytes from a patient's own tumor tissue. The goal of TIL therapy is to harness the power of the patient's own immune system to recognize and attack cancer cells more effectively.</p> <p>Here are the general steps involved in TIL therapy:</p> <ol style="list-style-type: none"> <li>1. Tumor Tissue Extraction: A surgical procedure is performed to remove a piece of the patient's tumor tissue. This tissue contains immune cells, including T lymphocytes, that have infiltrated the tumor.</li> <li>2. TIL Isolation: The tumor tissue is processed in the laboratory to separate out the T lymphocytes. This is typically done by mechanically or enzymatically dissociating the tumor tissue into single cells.</li> <li>3. TIL Expansion: The isolated T lymphocytes are then cultured in the laboratory under specific conditions that promote their growth and activation. This involves providing the cells with growth factors, interleukins, and other stimulatory signals. The aim is to expand the number of TILs to generate a larger population of tumor-reactive immune cells.</li> <li>4. Conditioning Regimen: Prior to TIL infusion, some patients may undergo a conditioning regimen, which may involve chemotherapy or lymphodepleting treatments. This conditioning regimen aims to reduce the number of existing immune cells in the body and create a more favorable environment for the infused TILs to proliferate and exert their anti-tumor activity.</li> <li>5. TIL Infusion: The expanded TILs are then reinfused back into the patient's body. The TILs, which have been primed to recognize and target cancer cells, can migrate to the tumor site and mount an immune response against the cancer cells.</li> </ol> <p>TIL therapy is primarily used in the treatment of certain types of advanced or metastatic melanoma, but it is also being explored in clinical trials for other solid tumor types. It is considered a personalized therapy as it relies on the extraction and expansion of a patient's own immune cells.</p> <p>It's important to note that TIL therapy is a specialized treatment approach that requires specialized laboratory facilities and expertise. The use of TIL therapy is determined on a case-by-case basis, considering factors such as the patient's medical condition, tumor characteristics, and treatment options.</p> | <p>Tumor-infiltrating lymphocyte (TIL) therapy is a form of cancer treatment that involves the use of a patient's own immune cells, specifically T lymphocytes, to target and attack cancer cells. TIL therapy is a type of adoptive cell transfer therapy, where immune cells are harvested from the patient, expanded or modified in the laboratory, and then reinfused back into the patient.</p> <p>Here is an overview of the TIL therapy process:</p> <ol style="list-style-type: none"> <li>1. Tumor Tissue Extraction: A small portion of the patient's tumor is surgically removed.</li> <li>2. TIL Isolation: The tumor tissue is processed to extract immune cells, particularly T lymphocytes, that have infiltrated the tumor. These TILs are the immune cells that have demonstrated an ability to recognize and respond to the cancer cells.</li> <li>3. TIL Expansion: The isolated TILs are then grown and expanded in the laboratory over a period of several weeks. This is typically achieved by providing the TILs with the necessary nutrients, growth factors, and cytokines to stimulate their proliferation.</li> <li>4. Conditioning Regimen: Prior to TIL infusion, some patients may undergo a conditioning regimen, which can involve chemotherapy or radiation therapy. This conditioning helps to create space within the immune system for the infused TILs to expand and function more effectively.</li> <li>5. TIL Infusion: The expanded TILs are then reintroduced into the patient's body through intravenous infusion. These TILs, armed with the ability to recognize and attack cancer cells, travel to the tumor site and mount an immune response against the cancer.</li> </ol> <p>TIL therapy is primarily used in the treatment of certain types of advanced or metastatic melanoma. It has shown promising results in some patients, leading to tumor regression and improved outcomes. However, TIL therapy is still considered an experimental treatment and is typically offered within the context of clinical trials.</p> <p>It's important to note that TIL therapy is a personalized treatment approach that requires specialized laboratory facilities and expertise. The selection of patients and the administration of TIL therapy is done under the guidance of healthcare professionals who consider factors such as the patient's medical condition, tumor characteristics, and treatment options.</p> |
|-------------------|-------------------------------------------------------------------------------------------------------------------------------------------------------------------------------------------------------------------------------------------------------------------------------------------------------------------------------------------------------------------------------------------------------------------------------------------------------------------------------------------------------------------------------------------------------------------------------------------------------------------------------------------------------------------------------------------------------------------------------------------------------------------------------------------------------------------------------------------------------------------------------------------------------------------------------------------------------------------------------------------------------------------------------------------------------------------------------------------------------------------------------------------------------------------------------------------------------------------------------------------------------------------------------------------------------------------------------------------------------------------------------------------------------------------------------------------------------------------------------------------------------------------------------------------------------------------------------------------------------------------------------------------------------------------------------------------------------------------------------------------------------------------------------------------------------------------------------------------------------------------------------------------------------------------------------------------------------------------------------------------------------------------------------------------------------------------------------------------------------------------------------------------------------------------------------------------------------------------------------------------------|-------------------------------------------------------------------------------------------------------------------------------------------------------------------------------------------------------------------------------------------------------------------------------------------------------------------------------------------------------------------------------------------------------------------------------------------------------------------------------------------------------------------------------------------------------------------------------------------------------------------------------------------------------------------------------------------------------------------------------------------------------------------------------------------------------------------------------------------------------------------------------------------------------------------------------------------------------------------------------------------------------------------------------------------------------------------------------------------------------------------------------------------------------------------------------------------------------------------------------------------------------------------------------------------------------------------------------------------------------------------------------------------------------------------------------------------------------------------------------------------------------------------------------------------------------------------------------------------------------------------------------------------------------------------------------------------------------------------------------------------------------------------------------------------------------------------------------------------------------------------------------------------------------------------------------------------------------------------------------------------------------------------------------------------------------------------------------------------------------------------------------------------------------------------------------------------------------------------------------------------------------------------------------------------------------------------------------------------------------------------------------------------------------------------------------------------------------------------------------------------------------------------------------------------------------------------------------|--------------------------------------------------------------------------------------------------------------------------------------------------------------------------------------------------------------------------------------------------------------------------------------------------------------------------------------------------------------------------------------------------------------------------------------------------------------------------------------------------------------------------------------------------------------------------------------------------------------------------------------------------------------------------------------------------------------------------------------------------------------------------------------------------------------------------------------------------------------------------------------------------------------------------------------------------------------------------------------------------------------------------------------------------------------------------------------------------------------------------------------------------------------------------------------------------------------------------------------------------------------------------------------------------------------------------------------------------------------------------------------------------------------------------------------------------------------------------------------------------------------------------------------------------------------------------------------------------------------------------------------------------------------------------------------------------------------------------------------------------------------------------------------------------------------------------------------------------------------------------------------------------------------------------------------------------------------------------------------------------------------------------------------------------------------------------------------------------------------------------------------------------------------------------------------------------------------------------------------------------------------------------------------------------------------------------------------------------------------------------------------------------------------------------------------------------------------------|

|            |                                                                                                                                                                                                                                                                                                                                                                                                                                                                                                                                                                                                                                                                                                                                                                                                                                                                                                                                                                                                                                                                                                                                                                                                                                                                                                                                                                                                                                                                                                                                                                                                                                                                                                                                                                                                                                                                                                                                                             |                                                                                                                                                                                                                                                                                                                                                                                                                                                                                                                                                                                                                                                                                                                                                                                                                                                                                                                                                                                                                                                                                                                                                                                                                                                                                                                                                                                                                                                                                                                                                                                                                                                                                                                                                                                                                                                                                                                                                                                                                                                                                                                                                                                                                                                                                                                                                                                                                                                                                                                                                                                                                                                                                                                      |                                                                                                                                                                                                                                                                                                                                                                                                                                                                                                                                                                                                                                                                                                                                                                                                                                                                                                                                                                                                                                                                                                                                                                                                                                                                                                                                                                                                                                                                                                                                                                                                                                                                                                                                                                                                                                                                             |
|------------|-------------------------------------------------------------------------------------------------------------------------------------------------------------------------------------------------------------------------------------------------------------------------------------------------------------------------------------------------------------------------------------------------------------------------------------------------------------------------------------------------------------------------------------------------------------------------------------------------------------------------------------------------------------------------------------------------------------------------------------------------------------------------------------------------------------------------------------------------------------------------------------------------------------------------------------------------------------------------------------------------------------------------------------------------------------------------------------------------------------------------------------------------------------------------------------------------------------------------------------------------------------------------------------------------------------------------------------------------------------------------------------------------------------------------------------------------------------------------------------------------------------------------------------------------------------------------------------------------------------------------------------------------------------------------------------------------------------------------------------------------------------------------------------------------------------------------------------------------------------------------------------------------------------------------------------------------------------|----------------------------------------------------------------------------------------------------------------------------------------------------------------------------------------------------------------------------------------------------------------------------------------------------------------------------------------------------------------------------------------------------------------------------------------------------------------------------------------------------------------------------------------------------------------------------------------------------------------------------------------------------------------------------------------------------------------------------------------------------------------------------------------------------------------------------------------------------------------------------------------------------------------------------------------------------------------------------------------------------------------------------------------------------------------------------------------------------------------------------------------------------------------------------------------------------------------------------------------------------------------------------------------------------------------------------------------------------------------------------------------------------------------------------------------------------------------------------------------------------------------------------------------------------------------------------------------------------------------------------------------------------------------------------------------------------------------------------------------------------------------------------------------------------------------------------------------------------------------------------------------------------------------------------------------------------------------------------------------------------------------------------------------------------------------------------------------------------------------------------------------------------------------------------------------------------------------------------------------------------------------------------------------------------------------------------------------------------------------------------------------------------------------------------------------------------------------------------------------------------------------------------------------------------------------------------------------------------------------------------------------------------------------------------------------------------------------------|-----------------------------------------------------------------------------------------------------------------------------------------------------------------------------------------------------------------------------------------------------------------------------------------------------------------------------------------------------------------------------------------------------------------------------------------------------------------------------------------------------------------------------------------------------------------------------------------------------------------------------------------------------------------------------------------------------------------------------------------------------------------------------------------------------------------------------------------------------------------------------------------------------------------------------------------------------------------------------------------------------------------------------------------------------------------------------------------------------------------------------------------------------------------------------------------------------------------------------------------------------------------------------------------------------------------------------------------------------------------------------------------------------------------------------------------------------------------------------------------------------------------------------------------------------------------------------------------------------------------------------------------------------------------------------------------------------------------------------------------------------------------------------------------------------------------------------------------------------------------------------|
| <p>Q11</p> | <p>The immune system has the ability to reach and interact with cells and tissues throughout the body, but there are certain anatomical and physiological factors that can impact immune cell access to different parts of the body.</p> <p>The immune system is composed of various components, including immune cells, lymphoid organs (such as the thymus, bone marrow, lymph nodes, and spleen), and a network of vessels called the lymphatic system. Immune cells, such as lymphocytes (T cells, B cells, and natural killer cells), travel through the bloodstream and lymphatic vessels to reach different tissues and organs.</p> <p>While immune cells can circulate throughout the body, their distribution and activity can vary. Some immune cells, such as T cells, can migrate to various tissues and organs through the bloodstream, including secondary lymphoid organs and peripheral tissues. They can also move across blood vessel walls and enter tissues at sites of infection or inflammation.</p> <p>However, there are anatomical barriers and specialized microenvironments within certain tissues that can restrict immune cell access. For example, the blood-brain barrier separates the brain from the circulating immune cells, providing protection to the central nervous system. Similarly, the immune privilege of certain tissues, such as the eye or testes, can limit immune cell infiltration to maintain tissue integrity.</p> <p>Moreover, cancer cells can develop strategies to evade immune surveillance or create an immunosuppressive microenvironment, which may further impact immune cell access and function within tumors.</p> <p>Overall, while the immune system can reach most parts of the body, the distribution and effectiveness of immune cells in specific tissues can be influenced by anatomical barriers, tissue-specific characteristics, and the presence of pathological conditions.</p> | <p>The immune system has the ability to reach and interact with cells and tissues throughout the body, but there are certain limitations and variations in immune cell distribution and accessibility.</p> <p>The immune system consists of immune cells, organs, and tissues that work together to defend against pathogens and abnormal cells. Immune cells, such as lymphocytes (T cells, B cells, and natural killer cells), circulate through the bloodstream and lymphatic system, allowing them to reach most parts of the body.</p> <p>However, it's important to note that immune cell distribution and activity can vary in different tissues and organs. Some factors that can impact immune cell access include:</p> <ol style="list-style-type: none"> <li><b>1. Lymphoid Organs:</b> Lymphoid organs, such as lymph nodes, spleen, and tonsils, serve as sites where immune cells encounter antigens and initiate immune responses. These organs have specialized structures and high concentrations of immune cells.</li> <li><b>2. Lymphatic System:</b> The lymphatic system is a network of vessels that carries lymph fluid and immune cells throughout the body. Immune cells can travel through lymphatic vessels and enter lymph nodes, where they can encounter antigens and mount immune responses.</li> <li><b>3. Anatomical Barriers:</b> Certain anatomical barriers can limit immune cell access to certain sites. For example, the blood-brain barrier restricts the entry of immune cells into the central nervous system. Similarly, the placenta provides a barrier between the maternal and fetal immune systems.</li> <li><b>4. Tissue Microenvironments:</b> Different tissues and organs have unique microenvironments that can influence immune cell activity. For example, immune cells may have limited access to certain tissues due to specialized structural features, such as the unique microarchitecture of the lungs or the protective mucosal surfaces of the gastrointestinal tract.</li> <li><b>5. Tumor Microenvironment:</b> In the context of cancer, tumors can create an immunosuppressive microenvironment that restricts immune cell infiltration and function within the tumor. This can hinder the immune system's ability to effectively recognize and eliminate cancer cells.</li> </ol> <p>While the immune system has the capacity to reach most parts of the body, the distribution and effectiveness of immune cells in specific tissues can be influenced by various factors. However, immune responses can still occur in different tissues, and the immune system continuously surveys and responds to potential threats throughout the body.</p> | <p>Yes, the immune system has the ability to reach and interact with cells and tissues throughout the body. The immune system is comprised of various components, including immune cells, lymphoid organs, and lymphatic vessels, that work together to defend the body against pathogens and abnormal cells.</p> <p>Immune cells, such as lymphocytes (T cells, B cells, and natural killer cells), circulate throughout the body via the bloodstream and lymphatic system. These immune cells can travel to various tissues and organs, allowing them to survey and respond to potential threats.</p> <p>The lymphatic system plays a crucial role in immune cell circulation. Lymphatic vessels carry lymph fluid, which contains immune cells, throughout the body. Lymph nodes, which are distributed along the lymphatic vessels, serve as filtering stations where immune cells encounter foreign substances and mount immune responses.</p> <p>While the immune system can reach most parts of the body, it's important to note that certain factors can impact immune cell access to specific sites. Anatomical barriers, such as the blood-brain barrier, can restrict immune cell entry into certain compartments like the central nervous system. Additionally, certain tissues or organs may have specialized microenvironments that influence immune cell activity.</p> <p>Furthermore, immune responses can be influenced by various factors, including the presence of infections, inflammation, or cancer. In such cases, immune cells can be recruited to specific sites of infection or inflammation to mount a targeted immune response.</p> <p>Overall, the immune system has a remarkable ability to reach and interact with cells and tissues throughout the body, allowing it to provide protection and surveillance against potential threats.</p> |
|------------|-------------------------------------------------------------------------------------------------------------------------------------------------------------------------------------------------------------------------------------------------------------------------------------------------------------------------------------------------------------------------------------------------------------------------------------------------------------------------------------------------------------------------------------------------------------------------------------------------------------------------------------------------------------------------------------------------------------------------------------------------------------------------------------------------------------------------------------------------------------------------------------------------------------------------------------------------------------------------------------------------------------------------------------------------------------------------------------------------------------------------------------------------------------------------------------------------------------------------------------------------------------------------------------------------------------------------------------------------------------------------------------------------------------------------------------------------------------------------------------------------------------------------------------------------------------------------------------------------------------------------------------------------------------------------------------------------------------------------------------------------------------------------------------------------------------------------------------------------------------------------------------------------------------------------------------------------------------|----------------------------------------------------------------------------------------------------------------------------------------------------------------------------------------------------------------------------------------------------------------------------------------------------------------------------------------------------------------------------------------------------------------------------------------------------------------------------------------------------------------------------------------------------------------------------------------------------------------------------------------------------------------------------------------------------------------------------------------------------------------------------------------------------------------------------------------------------------------------------------------------------------------------------------------------------------------------------------------------------------------------------------------------------------------------------------------------------------------------------------------------------------------------------------------------------------------------------------------------------------------------------------------------------------------------------------------------------------------------------------------------------------------------------------------------------------------------------------------------------------------------------------------------------------------------------------------------------------------------------------------------------------------------------------------------------------------------------------------------------------------------------------------------------------------------------------------------------------------------------------------------------------------------------------------------------------------------------------------------------------------------------------------------------------------------------------------------------------------------------------------------------------------------------------------------------------------------------------------------------------------------------------------------------------------------------------------------------------------------------------------------------------------------------------------------------------------------------------------------------------------------------------------------------------------------------------------------------------------------------------------------------------------------------------------------------------------------|-----------------------------------------------------------------------------------------------------------------------------------------------------------------------------------------------------------------------------------------------------------------------------------------------------------------------------------------------------------------------------------------------------------------------------------------------------------------------------------------------------------------------------------------------------------------------------------------------------------------------------------------------------------------------------------------------------------------------------------------------------------------------------------------------------------------------------------------------------------------------------------------------------------------------------------------------------------------------------------------------------------------------------------------------------------------------------------------------------------------------------------------------------------------------------------------------------------------------------------------------------------------------------------------------------------------------------------------------------------------------------------------------------------------------------------------------------------------------------------------------------------------------------------------------------------------------------------------------------------------------------------------------------------------------------------------------------------------------------------------------------------------------------------------------------------------------------------------------------------------------------|

|            |                                                                                                                                                                                                                                                                                                                                                                                                                                                                                                                                                                                                                                                                                                                                                                                                                                                                                                                                                                                                                                                                                                                                                                                                                                                                                                                                                                                                                                                                                                                                                                                                                                                                                                                                                                                                                                                                                                                                                                                                                                                                                                                                                                                                                                                                                                                                                                                                                   |                                                                                                                                                                                                                                                                                                                                                                                                                                                                                                                                                                                                                                                                                                                                                                                                                                                                                                                                                                                                                                                                                                                                                                                                                                                                                                                                                                                                                                                                                                                                                                                                                                                                                                                                                                                                                                                                                                                                                                                                                                                                                                                                                                                                                                                                                                                                                                                                                                                                                                                                                                                                                                                                       |                                                                                                                                                                                                                                                                                                                                                                                                                                                                                                                                                                                                                                                                                                                                                                                                                                                                                                                                                                                                                                                                                                                                                                                                                                                                                                                                                                                                                                                                                                                                                                                                                                                                                                                                                                                                                                                                                                                                                                                                                                                                                                                                                                                                                                                                                                                                                                                                                                                                                                                                                                                                                                                                                                                                 |
|------------|-------------------------------------------------------------------------------------------------------------------------------------------------------------------------------------------------------------------------------------------------------------------------------------------------------------------------------------------------------------------------------------------------------------------------------------------------------------------------------------------------------------------------------------------------------------------------------------------------------------------------------------------------------------------------------------------------------------------------------------------------------------------------------------------------------------------------------------------------------------------------------------------------------------------------------------------------------------------------------------------------------------------------------------------------------------------------------------------------------------------------------------------------------------------------------------------------------------------------------------------------------------------------------------------------------------------------------------------------------------------------------------------------------------------------------------------------------------------------------------------------------------------------------------------------------------------------------------------------------------------------------------------------------------------------------------------------------------------------------------------------------------------------------------------------------------------------------------------------------------------------------------------------------------------------------------------------------------------------------------------------------------------------------------------------------------------------------------------------------------------------------------------------------------------------------------------------------------------------------------------------------------------------------------------------------------------------------------------------------------------------------------------------------------------|-----------------------------------------------------------------------------------------------------------------------------------------------------------------------------------------------------------------------------------------------------------------------------------------------------------------------------------------------------------------------------------------------------------------------------------------------------------------------------------------------------------------------------------------------------------------------------------------------------------------------------------------------------------------------------------------------------------------------------------------------------------------------------------------------------------------------------------------------------------------------------------------------------------------------------------------------------------------------------------------------------------------------------------------------------------------------------------------------------------------------------------------------------------------------------------------------------------------------------------------------------------------------------------------------------------------------------------------------------------------------------------------------------------------------------------------------------------------------------------------------------------------------------------------------------------------------------------------------------------------------------------------------------------------------------------------------------------------------------------------------------------------------------------------------------------------------------------------------------------------------------------------------------------------------------------------------------------------------------------------------------------------------------------------------------------------------------------------------------------------------------------------------------------------------------------------------------------------------------------------------------------------------------------------------------------------------------------------------------------------------------------------------------------------------------------------------------------------------------------------------------------------------------------------------------------------------------------------------------------------------------------------------------------------------|---------------------------------------------------------------------------------------------------------------------------------------------------------------------------------------------------------------------------------------------------------------------------------------------------------------------------------------------------------------------------------------------------------------------------------------------------------------------------------------------------------------------------------------------------------------------------------------------------------------------------------------------------------------------------------------------------------------------------------------------------------------------------------------------------------------------------------------------------------------------------------------------------------------------------------------------------------------------------------------------------------------------------------------------------------------------------------------------------------------------------------------------------------------------------------------------------------------------------------------------------------------------------------------------------------------------------------------------------------------------------------------------------------------------------------------------------------------------------------------------------------------------------------------------------------------------------------------------------------------------------------------------------------------------------------------------------------------------------------------------------------------------------------------------------------------------------------------------------------------------------------------------------------------------------------------------------------------------------------------------------------------------------------------------------------------------------------------------------------------------------------------------------------------------------------------------------------------------------------------------------------------------------------------------------------------------------------------------------------------------------------------------------------------------------------------------------------------------------------------------------------------------------------------------------------------------------------------------------------------------------------------------------------------------------------------------------------------------------------|
| <p>Q12</p> | <p>Combining immunotherapy with chemotherapy or radiotherapy is often done to enhance treatment outcomes and improve patient responses. There are several reasons why these treatment modalities are combined:</p> <ol style="list-style-type: none"> <li>1. Synergistic Effects: Chemotherapy and radiotherapy can have direct cytotoxic effects on cancer cells, causing tumor cell death. This cell death releases antigens and other signals that can help activate the immune system and enhance the effectiveness of immunotherapy. The combination of immunotherapy with chemotherapy or radiotherapy can lead to a synergistic effect, where the treatments work together to enhance anti-tumor immune responses and improve overall outcomes.</li> <li>2. Immune Modulation: Chemotherapy and radiotherapy can influence the tumor microenvironment and modulate the immune response. They can cause immunogenic cell death, which stimulates the release of tumor-associated antigens and danger signals that activate immune cells. Additionally, these treatments can alter the immunosuppressive tumor microenvironment, making it more favorable for immune cells to recognize and attack cancer cells.</li> <li>3. Reduction of Tumor Burden: Chemotherapy and radiotherapy can reduce the size of tumors and the overall tumor burden. By reducing tumor mass, these treatments can help alleviate immune suppression caused by the presence of a large tumor. This reduction in tumor burden can create a more favorable environment for immune cells and immunotherapy to exert their effects.</li> <li>4. Broad Spectrum Treatment: Chemotherapy and radiotherapy have the ability to target cancer cells throughout the body, including metastatic lesions that may not be accessible to immunotherapy. By using these treatments in combination, it is possible to target both primary tumors and distant metastases, providing a more comprehensive and systemic approach to cancer treatment.</li> </ol> <p>It's important to note that the specific combination and sequencing of these treatments depend on the individual patient's cancer type, stage, and overall health. The decision to combine immunotherapy with chemotherapy or radiotherapy is made by healthcare professionals based on clinical evidence, treatment guidelines, and the patient's specific circumstances.</p> | <p>Combining immunotherapy with chemotherapy or radiotherapy can have several benefits in the treatment of cancer. Here are some reasons why these treatment modalities are often used in combination:</p> <ol style="list-style-type: none"> <li>1. Complementary Mechanisms of Action: Immunotherapy, chemotherapy, and radiotherapy have different mechanisms of action and can target cancer cells through different pathways. Combining these treatments can provide a more comprehensive and synergistic approach to attacking cancer. While immunotherapy aims to enhance the immune response against cancer cells, chemotherapy and radiotherapy directly kill cancer cells or inhibit their growth. By using these treatments together, there is a potential for enhanced tumor cell killing and improved treatment outcomes.</li> <li>2. Sensitization of Tumor Cells: Chemotherapy and radiotherapy can sensitize tumor cells to the effects of immunotherapy. They can induce immunogenic cell death, which leads to the release of tumor antigens and danger signals, stimulating the immune system to recognize and attack cancer cells more effectively. Additionally, these treatments can alter the tumor microenvironment, making it more receptive to immunotherapy and enhancing immune cell infiltration.</li> <li>3. Reduction of Tumor Burden: Chemotherapy and radiotherapy can shrink tumors and reduce the overall tumor burden. By reducing the number of cancer cells, it may be easier for the immune system and immunotherapy to target and eliminate the remaining cancer cells. Additionally, the reduction in tumor burden can alleviate immunosuppressive factors produced by the tumor, allowing the immune system to mount a more effective response.</li> <li>4. Management of Metastatic Disease: Chemotherapy and radiotherapy can be particularly beneficial in the treatment of metastatic cancer. They can target cancer cells in distant sites where the immune system may have limited access. By combining these treatments with immunotherapy, there is an opportunity to both control the systemic spread of cancer and enhance the immune response against metastatic lesions.</li> </ol> <p>It's important to note that the specific combination and sequencing of these treatments depend on factors such as the type of cancer, stage of the disease, individual patient characteristics, and treatment goals. The decision to combine immunotherapy with chemotherapy or radiotherapy is made by healthcare professionals based on clinical evidence, treatment guidelines, and personalized treatment plans.</p> | <p>Combining immunotherapy with chemotherapy or radiotherapy is done for several reasons:</p> <ol style="list-style-type: none"> <li>1. Enhanced Response: Immunotherapy, chemotherapy, and radiotherapy work through different mechanisms to target cancer cells. Combining these treatments can increase the likelihood of a stronger and more comprehensive response. Chemotherapy and radiotherapy can directly kill cancer cells or damage their DNA, causing tumor shrinkage. This can release tumor antigens and promote an immune response. Immunotherapy, on the other hand, can help activate the immune system and enhance its ability to recognize and attack cancer cells. By combining these approaches, there is a potential for improved treatment outcomes.</li> <li>2. Synergistic Effects: The combination of immunotherapy with chemotherapy or radiotherapy can have synergistic effects. Chemotherapy and radiotherapy can create an environment that is more conducive to the immune system's response. They can stimulate the release of tumor antigens and promote inflammation, making cancer cells more visible to the immune system. Immunotherapy can then enhance and direct the immune response towards these targets. Together, these treatments can work synergistically to improve the anti-tumor effects.</li> <li>3. Addressing Resistance: Cancer cells can develop resistance to single treatment modalities, such as immunotherapy. By combining treatments with different mechanisms of action, there is a higher chance of overcoming resistance mechanisms. Chemotherapy and radiotherapy can target cancer cells in different ways, making it harder for cancer cells to evade treatment. Combining these treatments with immunotherapy can help overcome resistance and increase the effectiveness of the overall treatment approach.</li> <li>4. Broad Spectrum Treatment: Chemotherapy and radiotherapy have the advantage of being able to target cancer cells throughout the body, including metastatic sites. Immunotherapy may have limitations in reaching certain tumor locations or may be less effective against metastases. By combining treatments, both primary tumors and metastases can be targeted, leading to a more comprehensive treatment approach.</li> </ol> <p>It's important to note that the specific combination and sequencing of these treatments depend on factors such as the type and stage of cancer, individual patient characteristics, and treatment goals. The decision to combine immunotherapy with chemotherapy or radiotherapy is made by healthcare professionals based on the specific circumstances and the best available evidence.</p> |
|------------|-------------------------------------------------------------------------------------------------------------------------------------------------------------------------------------------------------------------------------------------------------------------------------------------------------------------------------------------------------------------------------------------------------------------------------------------------------------------------------------------------------------------------------------------------------------------------------------------------------------------------------------------------------------------------------------------------------------------------------------------------------------------------------------------------------------------------------------------------------------------------------------------------------------------------------------------------------------------------------------------------------------------------------------------------------------------------------------------------------------------------------------------------------------------------------------------------------------------------------------------------------------------------------------------------------------------------------------------------------------------------------------------------------------------------------------------------------------------------------------------------------------------------------------------------------------------------------------------------------------------------------------------------------------------------------------------------------------------------------------------------------------------------------------------------------------------------------------------------------------------------------------------------------------------------------------------------------------------------------------------------------------------------------------------------------------------------------------------------------------------------------------------------------------------------------------------------------------------------------------------------------------------------------------------------------------------------------------------------------------------------------------------------------------------|-----------------------------------------------------------------------------------------------------------------------------------------------------------------------------------------------------------------------------------------------------------------------------------------------------------------------------------------------------------------------------------------------------------------------------------------------------------------------------------------------------------------------------------------------------------------------------------------------------------------------------------------------------------------------------------------------------------------------------------------------------------------------------------------------------------------------------------------------------------------------------------------------------------------------------------------------------------------------------------------------------------------------------------------------------------------------------------------------------------------------------------------------------------------------------------------------------------------------------------------------------------------------------------------------------------------------------------------------------------------------------------------------------------------------------------------------------------------------------------------------------------------------------------------------------------------------------------------------------------------------------------------------------------------------------------------------------------------------------------------------------------------------------------------------------------------------------------------------------------------------------------------------------------------------------------------------------------------------------------------------------------------------------------------------------------------------------------------------------------------------------------------------------------------------------------------------------------------------------------------------------------------------------------------------------------------------------------------------------------------------------------------------------------------------------------------------------------------------------------------------------------------------------------------------------------------------------------------------------------------------------------------------------------------------|---------------------------------------------------------------------------------------------------------------------------------------------------------------------------------------------------------------------------------------------------------------------------------------------------------------------------------------------------------------------------------------------------------------------------------------------------------------------------------------------------------------------------------------------------------------------------------------------------------------------------------------------------------------------------------------------------------------------------------------------------------------------------------------------------------------------------------------------------------------------------------------------------------------------------------------------------------------------------------------------------------------------------------------------------------------------------------------------------------------------------------------------------------------------------------------------------------------------------------------------------------------------------------------------------------------------------------------------------------------------------------------------------------------------------------------------------------------------------------------------------------------------------------------------------------------------------------------------------------------------------------------------------------------------------------------------------------------------------------------------------------------------------------------------------------------------------------------------------------------------------------------------------------------------------------------------------------------------------------------------------------------------------------------------------------------------------------------------------------------------------------------------------------------------------------------------------------------------------------------------------------------------------------------------------------------------------------------------------------------------------------------------------------------------------------------------------------------------------------------------------------------------------------------------------------------------------------------------------------------------------------------------------------------------------------------------------------------------------------|

|                   |                                                                                                                                                                                                                                                                                                                                                                                                                                                                                                                                                                                                                                                                                                                                                                                                                                                                                                                                                                                                                                                                                                                                                                                                                                                                                                                                                                                                                                                                                                                                                                                                                                                                                                                                                                                                                                                                                                                                                                                                                                                                                                                                                                                                                                                                                                                                                                                                                                                                                                                                                                                                                                                                                                                                                                                                                 |                                                                                                                                                                                                                                                                                                                                                                                                                                                                                                                                                                                                                                                                                                                                                                                                                                                                                                                                                                                                                                                                                                                                                                                                                                                                                                                                                                                                                                                                                                                                                                                                                                                                                                                                                                                                                                                                                                                                                                                                                                                                                                                                                                                                                                                                                                                                                                                                                                                                                                                                                                                                                                                                       |                                                                                                                                                                                                                                                                                                                                                                                                                                                                                                                                                                                                                                                                                                                                                                                                                                                                                                                                                                                                                                                                                                                                                                                                                                                                                                                                                                                                                                                                                                                                                                                                                                                                                                                                                                                                                                                                                                                                                                                                                                                                                                                                                                                                                                                                                                                                                                                                                                                                                                                                                                                                                                                                                                                                                                                                                                                                                                                                                    |
|-------------------|-----------------------------------------------------------------------------------------------------------------------------------------------------------------------------------------------------------------------------------------------------------------------------------------------------------------------------------------------------------------------------------------------------------------------------------------------------------------------------------------------------------------------------------------------------------------------------------------------------------------------------------------------------------------------------------------------------------------------------------------------------------------------------------------------------------------------------------------------------------------------------------------------------------------------------------------------------------------------------------------------------------------------------------------------------------------------------------------------------------------------------------------------------------------------------------------------------------------------------------------------------------------------------------------------------------------------------------------------------------------------------------------------------------------------------------------------------------------------------------------------------------------------------------------------------------------------------------------------------------------------------------------------------------------------------------------------------------------------------------------------------------------------------------------------------------------------------------------------------------------------------------------------------------------------------------------------------------------------------------------------------------------------------------------------------------------------------------------------------------------------------------------------------------------------------------------------------------------------------------------------------------------------------------------------------------------------------------------------------------------------------------------------------------------------------------------------------------------------------------------------------------------------------------------------------------------------------------------------------------------------------------------------------------------------------------------------------------------------------------------------------------------------------------------------------------------|-----------------------------------------------------------------------------------------------------------------------------------------------------------------------------------------------------------------------------------------------------------------------------------------------------------------------------------------------------------------------------------------------------------------------------------------------------------------------------------------------------------------------------------------------------------------------------------------------------------------------------------------------------------------------------------------------------------------------------------------------------------------------------------------------------------------------------------------------------------------------------------------------------------------------------------------------------------------------------------------------------------------------------------------------------------------------------------------------------------------------------------------------------------------------------------------------------------------------------------------------------------------------------------------------------------------------------------------------------------------------------------------------------------------------------------------------------------------------------------------------------------------------------------------------------------------------------------------------------------------------------------------------------------------------------------------------------------------------------------------------------------------------------------------------------------------------------------------------------------------------------------------------------------------------------------------------------------------------------------------------------------------------------------------------------------------------------------------------------------------------------------------------------------------------------------------------------------------------------------------------------------------------------------------------------------------------------------------------------------------------------------------------------------------------------------------------------------------------------------------------------------------------------------------------------------------------------------------------------------------------------------------------------------------------|----------------------------------------------------------------------------------------------------------------------------------------------------------------------------------------------------------------------------------------------------------------------------------------------------------------------------------------------------------------------------------------------------------------------------------------------------------------------------------------------------------------------------------------------------------------------------------------------------------------------------------------------------------------------------------------------------------------------------------------------------------------------------------------------------------------------------------------------------------------------------------------------------------------------------------------------------------------------------------------------------------------------------------------------------------------------------------------------------------------------------------------------------------------------------------------------------------------------------------------------------------------------------------------------------------------------------------------------------------------------------------------------------------------------------------------------------------------------------------------------------------------------------------------------------------------------------------------------------------------------------------------------------------------------------------------------------------------------------------------------------------------------------------------------------------------------------------------------------------------------------------------------------------------------------------------------------------------------------------------------------------------------------------------------------------------------------------------------------------------------------------------------------------------------------------------------------------------------------------------------------------------------------------------------------------------------------------------------------------------------------------------------------------------------------------------------------------------------------------------------------------------------------------------------------------------------------------------------------------------------------------------------------------------------------------------------------------------------------------------------------------------------------------------------------------------------------------------------------------------------------------------------------------------------------------------------------|
| <p><b>Q13</b></p> | <p>The response to immunotherapy and the time it takes to control cancer can vary widely among individuals and cancer types. While some patients may experience rapid and significant responses, others may require more time to see the effects of immunotherapy. Here are a few factors that can influence the timing of response:</p> <ol style="list-style-type: none"> <li><b>1. Cancer Type:</b> The response to immunotherapy can vary depending on the type of cancer. Some cancer types, such as melanoma and certain types of lung cancer, have shown higher response rates to immunotherapy compared to others. The specific biology and characteristics of the cancer can influence how quickly the immune system can recognize and attack the cancer cells.</li> <li><b>2. Treatment Schedule:</b> Immunotherapy is typically administered in cycles over a period of weeks or months. The treatment schedule varies depending on the specific immunotherapy drug and the treatment plan prescribed by the healthcare professional. It can take several cycles for the immune system to mount a robust response and for the effects of immunotherapy to become evident.</li> <li><b>3. Individual Response:</b> Every individual's immune system is unique, and the response to immunotherapy can vary. Some patients may experience a rapid and dramatic response, with tumor shrinkage occurring within a few weeks or months. In contrast, for other patients, the response may be more gradual, with tumor stabilization or shrinkage occurring over a longer period of time.</li> <li><b>4. Tumor Burden and Location:</b> The size and location of the tumor can also influence the response to immunotherapy. Larger tumor burdens or tumors in critical organs may require more time to show a significant response. Additionally, immunotherapy may have variable penetration into certain tumor sites, which can affect the timing and extent of response.</li> <li><b>5. Combination Therapies:</b> Immunotherapy is often combined with other treatment modalities such as chemotherapy or targeted therapy. Combination treatments can lead to more rapid and effective tumor control compared to immunotherapy alone. The specific combination and sequencing of treatments can impact the timing of response.</li> </ol> <p>It's essential to note that immunotherapy is a dynamic and evolving field, and responses to treatment can be influenced by various factors. Monitoring the patient's response through regular imaging and clinical assessments is crucial in determining the effectiveness and timing of immunotherapy in controlling cancer. Healthcare professionals closely monitor patients and adjust treatment plans as needed based on individual responses.</p> | <p>The response to immunotherapy and the time it takes to control cancer can vary from person to person and depends on several factors. While some individuals may experience rapid and significant responses, others may require more time to see the effects of immunotherapy. Here are some key points to consider:</p> <ol style="list-style-type: none"> <li><b>1. Treatment Duration:</b> Immunotherapy is typically administered over a course of weeks or months, with multiple treatment cycles. The duration of treatment varies depending on the specific immunotherapy drug, cancer type, and individual treatment plan. It can take time for the immune system to mount an effective response and for the immunotherapy to have its desired effects.</li> <li><b>2. Cancer Type and Stage:</b> The type and stage of cancer play a role in the response to immunotherapy. Certain cancer types, such as melanoma and certain types of lung cancer, have shown higher response rates to immunotherapy. Additionally, earlier stages of cancer may respond more readily to treatment compared to advanced or metastatic stages.</li> <li><b>3. Individual Variations:</b> Every individual's immune system is unique, and the response to immunotherapy can vary. Some patients may experience a rapid and significant response, with tumor shrinkage occurring within weeks or a few months. Others may have a more gradual response, with tumor stabilization or shrinkage taking place over a longer period of time. It's important to have realistic expectations and understand that individual responses can differ.</li> <li><b>4. Tumor Characteristics:</b> The characteristics of the tumor, such as its size, location, and genetic makeup, can influence the response to immunotherapy. Larger tumors or tumors in critical organs may require more time to show a significant response. Additionally, certain genetic features of the tumor may affect its susceptibility to immunotherapy.</li> <li><b>5. Combination Therapies:</b> Immunotherapy is often used in combination with other treatment modalities, such as chemotherapy or targeted therapy. Combination therapies can have synergistic effects and may lead to more rapid and effective tumor control compared to immunotherapy alone.</li> </ol> <p>It's crucial to have regular follow-up visits and imaging scans to monitor the response to immunotherapy and assess the control of cancer. The healthcare team closely monitors patients' progress, evaluates tumor size, and considers any changes in symptoms to make adjustments to the treatment plan as needed.</p> | <p>The response to immunotherapy in controlling cancer can vary widely among individuals and cancer types. For some patients, immunotherapy can lead to rapid and significant tumor control, while for others, it may take more time or not result in complete tumor control. The timing of response depends on various factors, including:</p> <ol style="list-style-type: none"> <li><b>1. Cancer Type:</b> Different types of cancer have different response rates to immunotherapy. Some cancer types, such as melanoma, non-small cell lung cancer, and Hodgkin's lymphoma, have shown higher response rates to immunotherapy compared to others. The specific biology and characteristics of the cancer can influence the speed of response.</li> <li><b>2. Individual Variations:</b> Every individual's immune system is unique, and the response to immunotherapy can vary. Some patients may experience a rapid and dramatic response, with tumor shrinkage occurring within a few weeks or months of starting treatment. Others may have a more gradual response, with tumor stabilization or shrinkage occurring over a longer period of time. Additionally, factors such as overall health, immune system function, and genetic makeup can impact the response to treatment.</li> <li><b>3. Treatment Schedule:</b> Immunotherapy is typically administered in cycles over a period of weeks or months. The treatment schedule varies depending on the specific immunotherapy drug and the treatment plan prescribed by the healthcare professional. It may take several treatment cycles for the immune system to mount a robust response and for the effects of immunotherapy to become evident.</li> <li><b>4. Tumor Burden:</b> The size and extent of the tumor burden can influence the timing of response to immunotherapy. Larger tumor burdens or tumors in critical organs may require more time to show a significant response. In some cases, initial tumor growth or stability may occur before subsequent tumor shrinkage is observed.</li> <li><b>5. Combination Therapies:</b> Immunotherapy is often used in combination with other treatments, such as chemotherapy or targeted therapy. Combination therapies can have synergistic effects, with different treatments working together to enhance tumor control. The timing and sequence of combination therapies can impact the speed and effectiveness of response. It's important to remember that each person's response to immunotherapy is unique, and predicting the exact timing of response is challenging. Regular monitoring through imaging scans and clinical assessments is conducted to evaluate tumor response and make necessary treatment adjustments. Patients should work closely with their healthcare team to understand the potential benefits and expected timelines of immunotherapy for their specific cancer type and stage.</li> </ol> |
|-------------------|-----------------------------------------------------------------------------------------------------------------------------------------------------------------------------------------------------------------------------------------------------------------------------------------------------------------------------------------------------------------------------------------------------------------------------------------------------------------------------------------------------------------------------------------------------------------------------------------------------------------------------------------------------------------------------------------------------------------------------------------------------------------------------------------------------------------------------------------------------------------------------------------------------------------------------------------------------------------------------------------------------------------------------------------------------------------------------------------------------------------------------------------------------------------------------------------------------------------------------------------------------------------------------------------------------------------------------------------------------------------------------------------------------------------------------------------------------------------------------------------------------------------------------------------------------------------------------------------------------------------------------------------------------------------------------------------------------------------------------------------------------------------------------------------------------------------------------------------------------------------------------------------------------------------------------------------------------------------------------------------------------------------------------------------------------------------------------------------------------------------------------------------------------------------------------------------------------------------------------------------------------------------------------------------------------------------------------------------------------------------------------------------------------------------------------------------------------------------------------------------------------------------------------------------------------------------------------------------------------------------------------------------------------------------------------------------------------------------------------------------------------------------------------------------------------------------|-----------------------------------------------------------------------------------------------------------------------------------------------------------------------------------------------------------------------------------------------------------------------------------------------------------------------------------------------------------------------------------------------------------------------------------------------------------------------------------------------------------------------------------------------------------------------------------------------------------------------------------------------------------------------------------------------------------------------------------------------------------------------------------------------------------------------------------------------------------------------------------------------------------------------------------------------------------------------------------------------------------------------------------------------------------------------------------------------------------------------------------------------------------------------------------------------------------------------------------------------------------------------------------------------------------------------------------------------------------------------------------------------------------------------------------------------------------------------------------------------------------------------------------------------------------------------------------------------------------------------------------------------------------------------------------------------------------------------------------------------------------------------------------------------------------------------------------------------------------------------------------------------------------------------------------------------------------------------------------------------------------------------------------------------------------------------------------------------------------------------------------------------------------------------------------------------------------------------------------------------------------------------------------------------------------------------------------------------------------------------------------------------------------------------------------------------------------------------------------------------------------------------------------------------------------------------------------------------------------------------------------------------------------------------|----------------------------------------------------------------------------------------------------------------------------------------------------------------------------------------------------------------------------------------------------------------------------------------------------------------------------------------------------------------------------------------------------------------------------------------------------------------------------------------------------------------------------------------------------------------------------------------------------------------------------------------------------------------------------------------------------------------------------------------------------------------------------------------------------------------------------------------------------------------------------------------------------------------------------------------------------------------------------------------------------------------------------------------------------------------------------------------------------------------------------------------------------------------------------------------------------------------------------------------------------------------------------------------------------------------------------------------------------------------------------------------------------------------------------------------------------------------------------------------------------------------------------------------------------------------------------------------------------------------------------------------------------------------------------------------------------------------------------------------------------------------------------------------------------------------------------------------------------------------------------------------------------------------------------------------------------------------------------------------------------------------------------------------------------------------------------------------------------------------------------------------------------------------------------------------------------------------------------------------------------------------------------------------------------------------------------------------------------------------------------------------------------------------------------------------------------------------------------------------------------------------------------------------------------------------------------------------------------------------------------------------------------------------------------------------------------------------------------------------------------------------------------------------------------------------------------------------------------------------------------------------------------------------------------------------------------|

|                   |                                                                                                                                                                                                                                                                                                                                                                                                                                                                                                                                                                                                                                                                                                                                                                                                                                                                                                                                                                                                                                                                                                                                                                                                                                                                                                                                                                                                                                                                                                                                                                                                                                                                                                                                                                                                               |                                                                                                                                                                                                                                                                                                                                                                                                                                                                                                                                                                                                                                                                                                                                                                                                                                                                                                                                                                                                                                                                                                                                                                                                                                                                                                                                                                                                                                                                                                                                                                                                                                                                                                                                                                                                                                                         |                                                                                                                                                                                                                                                                                                                                                                                                                                                                                                                                                                                                                                                                                                                                                                                                                                                                                                                                                                                                                                                                                                                                                                                                                                                                                                                                                                                                                                                                                                                                                                                                                                                                                                                                                          |
|-------------------|---------------------------------------------------------------------------------------------------------------------------------------------------------------------------------------------------------------------------------------------------------------------------------------------------------------------------------------------------------------------------------------------------------------------------------------------------------------------------------------------------------------------------------------------------------------------------------------------------------------------------------------------------------------------------------------------------------------------------------------------------------------------------------------------------------------------------------------------------------------------------------------------------------------------------------------------------------------------------------------------------------------------------------------------------------------------------------------------------------------------------------------------------------------------------------------------------------------------------------------------------------------------------------------------------------------------------------------------------------------------------------------------------------------------------------------------------------------------------------------------------------------------------------------------------------------------------------------------------------------------------------------------------------------------------------------------------------------------------------------------------------------------------------------------------------------|---------------------------------------------------------------------------------------------------------------------------------------------------------------------------------------------------------------------------------------------------------------------------------------------------------------------------------------------------------------------------------------------------------------------------------------------------------------------------------------------------------------------------------------------------------------------------------------------------------------------------------------------------------------------------------------------------------------------------------------------------------------------------------------------------------------------------------------------------------------------------------------------------------------------------------------------------------------------------------------------------------------------------------------------------------------------------------------------------------------------------------------------------------------------------------------------------------------------------------------------------------------------------------------------------------------------------------------------------------------------------------------------------------------------------------------------------------------------------------------------------------------------------------------------------------------------------------------------------------------------------------------------------------------------------------------------------------------------------------------------------------------------------------------------------------------------------------------------------------|----------------------------------------------------------------------------------------------------------------------------------------------------------------------------------------------------------------------------------------------------------------------------------------------------------------------------------------------------------------------------------------------------------------------------------------------------------------------------------------------------------------------------------------------------------------------------------------------------------------------------------------------------------------------------------------------------------------------------------------------------------------------------------------------------------------------------------------------------------------------------------------------------------------------------------------------------------------------------------------------------------------------------------------------------------------------------------------------------------------------------------------------------------------------------------------------------------------------------------------------------------------------------------------------------------------------------------------------------------------------------------------------------------------------------------------------------------------------------------------------------------------------------------------------------------------------------------------------------------------------------------------------------------------------------------------------------------------------------------------------------------|
| <p><b>Q14</b></p> | <p>Yes, combination immunotherapy with ipilimumab and nivolumab has demonstrated improved efficacy compared to single-agent immunotherapy in the treatment of kidney cancer, specifically advanced renal cell carcinoma (RCC).</p> <p>Ipilimumab is an immune checkpoint inhibitor that targets cytotoxic T-lymphocyte-associated protein 4 (CTLA-4), while nivolumab targets programmed cell death protein 1 (PD-1). By combining these two drugs, the goal is to enhance the immune response against cancer cells by blocking two different immune checkpoints simultaneously.</p> <p>Clinical trials, such as the CheckMate 214 trial, have evaluated the efficacy of combination immunotherapy with ipilimumab and nivolumab compared to single-agent immunotherapy or targeted therapy in advanced RCC patients. The results have shown improved outcomes with the combination therapy.</p> <p>In CheckMate 214, the combination of ipilimumab and nivolumab demonstrated superior overall survival and objective response rates compared to sunitinib, a targeted therapy commonly used in RCC. The combination therapy resulted in a higher response rate, longer progression-free survival, and improved overall survival in intermediate- and poor-risk patients with previously untreated advanced RCC.</p> <p>Based on these positive results, the combination of ipilimumab and nivolumab received regulatory approval for the treatment of intermediate- and poor-risk advanced RCC. However, treatment decisions are made on an individual basis, considering factors such as the patient's specific characteristics, overall health, and treatment goals. It's important to consult with a healthcare professional to determine the most appropriate treatment approach for kidney cancer.</p> | <p>Yes, combination immunotherapy with ipilimumab and nivolumab has shown improved efficacy compared to single-agent immunotherapy in the treatment of advanced renal cell carcinoma (RCC), a type of kidney cancer.</p> <p>Ipilimumab is an immune checkpoint inhibitor that targets cytotoxic T-lymphocyte-associated protein 4 (CTLA-4), while nivolumab targets programmed cell death protein 1 (PD-1). By combining these two drugs, the aim is to enhance the immune response against cancer cells by blocking two different immune checkpoints simultaneously.</p> <p>Clinical trials have evaluated the efficacy of combination immunotherapy with ipilimumab and nivolumab compared to single-agent immunotherapy or targeted therapy in advanced RCC patients. One notable trial is the CheckMate 214 study, which compared the combination therapy with the targeted therapy sunitinib.</p> <p>Results from the CheckMate 214 trial demonstrated that the combination of ipilimumab and nivolumab was associated with significantly improved overall survival, progression-free survival, and objective response rates compared to sunitinib in intermediate- and poor-risk patients with previously untreated advanced RCC. The combination therapy showed superior efficacy outcomes in terms of tumor response and survival.</p> <p>Based on these positive findings, the combination of ipilimumab and nivolumab received regulatory approval as a first-line treatment option for intermediate- and poor-risk advanced RCC. However, treatment decisions are made on an individual basis, considering factors such as the patient's specific characteristics, overall health, and treatment goals. It's important to consult with a healthcare professional to determine the most appropriate treatment approach for kidney cancer.</p> | <p>Yes, combination immunotherapy with ipilimumab and nivolumab has demonstrated improved efficacy compared to single-agent immunotherapy for the treatment of kidney cancer, specifically advanced renal cell carcinoma (RCC).</p> <p>Ipilimumab is an immune checkpoint inhibitor that targets cytotoxic T-lymphocyte-associated protein 4 (CTLA-4), while nivolumab targets programmed cell death protein 1 (PD-1). By combining these two drugs, the goal is to enhance the immune response against cancer cells by blocking two different immune checkpoints simultaneously.</p> <p>Clinical trials, such as the CheckMate 214 trial, have evaluated the efficacy of combination immunotherapy with ipilimumab and nivolumab compared to single-agent immunotherapy or targeted therapy in advanced RCC patients. The results have consistently shown improved outcomes with the combination therapy.</p> <p>In the CheckMate 214 trial, the combination of ipilimumab and nivolumab demonstrated superior overall survival, progression-free survival, and objective response rates compared to sunitinib, a targeted therapy commonly used in RCC. The combination therapy showed better tumor response rates and longer-lasting responses.</p> <p>Based on these positive results, combination immunotherapy with ipilimumab and nivolumab has received regulatory approval as a first-line treatment option for advanced RCC. However, treatment decisions should be made on an individual basis, considering factors such as the patient's specific characteristics, overall health, and treatment goals. It's important to consult with a healthcare professional to determine the most appropriate treatment approach for kidney cancer.</p> |
| <p><b>Q15</b></p> | <p>Resistance to chimeric antigen receptor (CAR-T) therapy can occur due to various mechanisms, limiting the effectiveness of treatment. Here are some known mechanisms of resistance:</p> <ol style="list-style-type: none"> <li>1. Antigen Loss: CAR-T cells are designed to target specific antigens expressed on cancer cells. One mechanism of resistance is the loss or downregulation of the target antigen by cancer cells. When the targeted antigen is no longer present or significantly reduced, CAR-T cells may lose their ability to recognize and eliminate cancer cells.</li> </ol>                                                                                                                                                                                                                                                                                                                                                                                                                                                                                                                                                                                                                                                                                                                                                                                                                                                                                                                                                                                                                                                                                                                                                                                                           | <p>Resistance to chimeric antigen receptor (CAR-T) therapy can occur through several mechanisms, which can limit the effectiveness of treatment. Here are some known mechanisms of resistance:</p> <ol style="list-style-type: none"> <li>1. Antigen Loss: CAR-T cells are engineered to recognize and target specific antigens on cancer cells. One mechanism of resistance is the loss or downregulation of the target antigen on cancer cells. This can occur through genetic mutations, immune selection pressure, or other mechanisms. When the target</li> </ol>                                                                                                                                                                                                                                                                                                                                                                                                                                                                                                                                                                                                                                                                                                                                                                                                                                                                                                                                                                                                                                                                                                                                                                                                                                                                                  | <p>Resistance to chimeric antigen receptor (CAR-T) therapy can occur through several mechanisms, hindering the effectiveness of treatment. Here are some of the known mechanisms of resistance:</p> <ol style="list-style-type: none"> <li>1. Antigen Loss: One mechanism of resistance is the loss or downregulation of the target antigen on cancer cells. CAR-T cells are designed to recognize specific antigens on cancer cells, but if the target antigen is no longer present or reduced, CAR-T cells may not be able to effectively recognize and eliminate the cancer</li> </ol>                                                                                                                                                                                                                                                                                                                                                                                                                                                                                                                                                                                                                                                                                                                                                                                                                                                                                                                                                                                                                                                                                                                                                                |

|                                                                                                                                                                                                                                                                                                                                                                                                                                                                                                                                                                                                                                                                                                                                                                                                                                                                                                                                                                                                                                                                                                                                                                                                                                                                                                                                                                                                                                                                                                                                                                                                                                                                                                                                                                                                                                                                                                                                                                                                                                                                                                                                                                                                                                                                                                                                                                                        |                                                                                                                                                                                                                                                                                                                                                                                                                                                                                                                                                                                                                                                                                                                                                                                                                                                                                                                                                                                                                                                                                                                                                                                                                                                                                                                                                                                                                                                                                                                                                                                                                                                                                                                                                                                                                                                                                                                                                                                                                                                                                                                                                                                                                                                                                                                                                                                                                                                                                                                                                  |                                                                                                                                                                                                                                                                                                                                                                                                                                                                                                                                                                                                                                                                                                                                                                                                                                                                                                                                                                                                                                                                                                                                                                                                                                                                                                                                                                                                                                                                                                                                                                                                                                                                                                                                                                                                                                                                                                                                                                                                                                                                                                                                                                                                                           |
|----------------------------------------------------------------------------------------------------------------------------------------------------------------------------------------------------------------------------------------------------------------------------------------------------------------------------------------------------------------------------------------------------------------------------------------------------------------------------------------------------------------------------------------------------------------------------------------------------------------------------------------------------------------------------------------------------------------------------------------------------------------------------------------------------------------------------------------------------------------------------------------------------------------------------------------------------------------------------------------------------------------------------------------------------------------------------------------------------------------------------------------------------------------------------------------------------------------------------------------------------------------------------------------------------------------------------------------------------------------------------------------------------------------------------------------------------------------------------------------------------------------------------------------------------------------------------------------------------------------------------------------------------------------------------------------------------------------------------------------------------------------------------------------------------------------------------------------------------------------------------------------------------------------------------------------------------------------------------------------------------------------------------------------------------------------------------------------------------------------------------------------------------------------------------------------------------------------------------------------------------------------------------------------------------------------------------------------------------------------------------------------|--------------------------------------------------------------------------------------------------------------------------------------------------------------------------------------------------------------------------------------------------------------------------------------------------------------------------------------------------------------------------------------------------------------------------------------------------------------------------------------------------------------------------------------------------------------------------------------------------------------------------------------------------------------------------------------------------------------------------------------------------------------------------------------------------------------------------------------------------------------------------------------------------------------------------------------------------------------------------------------------------------------------------------------------------------------------------------------------------------------------------------------------------------------------------------------------------------------------------------------------------------------------------------------------------------------------------------------------------------------------------------------------------------------------------------------------------------------------------------------------------------------------------------------------------------------------------------------------------------------------------------------------------------------------------------------------------------------------------------------------------------------------------------------------------------------------------------------------------------------------------------------------------------------------------------------------------------------------------------------------------------------------------------------------------------------------------------------------------------------------------------------------------------------------------------------------------------------------------------------------------------------------------------------------------------------------------------------------------------------------------------------------------------------------------------------------------------------------------------------------------------------------------------------------------|---------------------------------------------------------------------------------------------------------------------------------------------------------------------------------------------------------------------------------------------------------------------------------------------------------------------------------------------------------------------------------------------------------------------------------------------------------------------------------------------------------------------------------------------------------------------------------------------------------------------------------------------------------------------------------------------------------------------------------------------------------------------------------------------------------------------------------------------------------------------------------------------------------------------------------------------------------------------------------------------------------------------------------------------------------------------------------------------------------------------------------------------------------------------------------------------------------------------------------------------------------------------------------------------------------------------------------------------------------------------------------------------------------------------------------------------------------------------------------------------------------------------------------------------------------------------------------------------------------------------------------------------------------------------------------------------------------------------------------------------------------------------------------------------------------------------------------------------------------------------------------------------------------------------------------------------------------------------------------------------------------------------------------------------------------------------------------------------------------------------------------------------------------------------------------------------------------------------------|
| <p>2. Tumor Heterogeneity: Tumors can consist of a heterogeneous population of cells, with different subsets having varying antigen expression. While CAR-T cells may effectively target one subset of cancer cells, they may not recognize or eliminate other subsets that lack the target antigen. This heterogeneity can lead to incomplete tumor eradication and subsequent disease relapse.</p> <p>3. Immunosuppressive Microenvironment: Tumors often create an immunosuppressive microenvironment that can hinder the activity and persistence of CAR-T cells. Factors such as inhibitory checkpoints (e.g., PD-1, CTLA-4), immunosuppressive cells (e.g., regulatory T cells, myeloid-derived suppressor cells), and cytokines (e.g., TGF-<math>\beta</math>, IL-10) can dampen the immune response and impair CAR-T cell function.</p> <p>4. Tumor Immune Evasion Mechanisms: Cancer cells can employ various immune evasion strategies to evade CAR-T cell recognition and attack. These mechanisms include alterations in antigen processing and presentation, production of inhibitory molecules (e.g., PD-L1), and induction of immunosuppressive pathways. These strategies can weaken the effectiveness of CAR-T cells and allow cancer cells to evade immune surveillance.</p> <p>5. CAR-T Cell Exhaustion: Prolonged activation and exposure to the tumor microenvironment can lead to exhaustion of CAR-T cells. Exhausted CAR-T cells become less functional and lose their ability to effectively target and eliminate cancer cells. This exhaustion can be driven by persistent antigen stimulation, inhibitory signals, and metabolic factors.</p> <p>6. Genetic Alterations: Genetic alterations or mutations within cancer cells can confer resistance to CAR-T cell therapy. These alterations can affect signaling pathways involved in CAR-T cell function or create genetic changes that bypass CAR-T cell recognition.</p> <p>Efforts are ongoing to overcome these mechanisms of resistance through various strategies, such as developing dual-targeting CAR-T cells, using combination therapies, incorporating gene-editing techniques, and utilizing immune-modulating agents to overcome immunosuppression in the tumor microenvironment. Research in this area is crucial to improving the durability and effectiveness of CAR-T cell therapy.</p> | <p>antigen is no longer present or reduced, CAR-T cells may not be able to recognize and eliminate cancer cells effectively.</p> <p>2. Immunosuppressive Microenvironment: Tumors can create an immunosuppressive microenvironment that inhibits the activity of CAR-T cells. Factors such as inhibitory immune checkpoints (e.g., PD-1, CTLA-4), immunosuppressive cells (e.g., regulatory T cells, myeloid-derived suppressor cells), and soluble factors (e.g., cytokines, chemokines) can dampen the immune response and limit the function of CAR-T cells.</p> <p>3. Tumor Heterogeneity: Tumors often consist of heterogeneous populations of cancer cells with different antigen expression patterns. While CAR-T cells may effectively target one subset of cancer cells, they may not recognize or eliminate other subsets that lack the target antigen. This heterogeneity can contribute to incomplete tumor eradication and subsequent disease relapse.</p> <p>4. CAR-T Cell Exhaustion: Prolonged activation and exposure to the tumor microenvironment can lead to functional exhaustion of CAR-T cells. Exhausted CAR-T cells exhibit reduced effector functions and persistence, limiting their ability to effectively target and kill cancer cells.</p> <p>5. Immune Checkpoint Activation: Cancer cells can upregulate immune checkpoint molecules, such as PD-L1, which can interact with inhibitory receptors on CAR-T cells and inhibit their activity. This interaction can suppress CAR-T cell function and allow cancer cells to evade immune surveillance.</p> <p>6. Suppression by Soluble Factors: Tumors can release soluble factors, such as immunosuppressive cytokines (e.g., TGF-<math>\beta</math>, IL-10) or metabolic byproducts, which can impair the function of CAR-T cells and create an immunosuppressive microenvironment.</p> <p>7. Genetic Alterations: Genetic alterations or mutations within cancer cells can confer resistance to CAR-T cell therapy. These alterations can affect signaling pathways involved in CAR-T cell recognition or effector function, allowing cancer cells to escape CAR-T cell targeting.</p> <p>Overcoming resistance to CAR-T therapy is an active area of research, and various strategies are being explored, including the development of next-generation CAR-T cells with enhanced functionality, combination therapies targeting multiple pathways, and strategies to modulate the tumor microenvironment to make it more receptive to CAR-T cell activity.</p> | <p>cells.</p> <p>2. Tumor Microenvironment: The tumor microenvironment can contribute to resistance by creating an immunosuppressive and hostile environment for CAR-T cells. Factors such as inhibitory immune checkpoints, immunosuppressive cells (e.g., regulatory T cells, myeloid-derived suppressor cells), and soluble factors (e.g., cytokines, chemokines) can inhibit CAR-T cell function and limit their activity against cancer cells.</p> <p>3. CAR-T Cell Exhaustion: Prolonged activation and exposure to the tumor microenvironment can lead to CAR-T cell exhaustion. Exhausted CAR-T cells exhibit reduced effector functions, decreased persistence, and impaired ability to eliminate cancer cells.</p> <p>4. Immune Evasion Mechanisms: Cancer cells can employ various immune evasion mechanisms to resist CAR-T cell recognition and attack. These mechanisms include alterations in antigen presentation, production of inhibitory molecules (e.g., PD-L1), upregulation of immunosuppressive pathways, and acquisition of resistance mutations.</p> <p>5. Tumor Heterogeneity: Tumors can consist of heterogeneous populations of cancer cells with varying antigen expression profiles. While CAR-T cells may effectively target one subset of cancer cells, they may not recognize or eliminate other subsets that lack the targeted antigen. Tumor heterogeneity can contribute to incomplete tumor eradication and disease relapse.</p> <p>6. CAR-T Cell Persistence: Insufficient persistence of CAR-T cells in the body can limit their long-term efficacy. Factors such as antigen-dependent T cell exhaustion, loss of co-stimulatory signaling, and inadequate expansion and survival of CAR-T cells can impact their persistence and effectiveness.</p> <p>Overcoming resistance to CAR-T therapy is an active area of research. Strategies being explored include the development of next-generation CAR-T cells with improved persistence, resistance to immunosuppression, and enhanced functionality. Combination therapies with other immunomodulatory agents, such as checkpoint inhibitors, are also being investigated to overcome resistance and improve response rates.</p> |
|----------------------------------------------------------------------------------------------------------------------------------------------------------------------------------------------------------------------------------------------------------------------------------------------------------------------------------------------------------------------------------------------------------------------------------------------------------------------------------------------------------------------------------------------------------------------------------------------------------------------------------------------------------------------------------------------------------------------------------------------------------------------------------------------------------------------------------------------------------------------------------------------------------------------------------------------------------------------------------------------------------------------------------------------------------------------------------------------------------------------------------------------------------------------------------------------------------------------------------------------------------------------------------------------------------------------------------------------------------------------------------------------------------------------------------------------------------------------------------------------------------------------------------------------------------------------------------------------------------------------------------------------------------------------------------------------------------------------------------------------------------------------------------------------------------------------------------------------------------------------------------------------------------------------------------------------------------------------------------------------------------------------------------------------------------------------------------------------------------------------------------------------------------------------------------------------------------------------------------------------------------------------------------------------------------------------------------------------------------------------------------------|--------------------------------------------------------------------------------------------------------------------------------------------------------------------------------------------------------------------------------------------------------------------------------------------------------------------------------------------------------------------------------------------------------------------------------------------------------------------------------------------------------------------------------------------------------------------------------------------------------------------------------------------------------------------------------------------------------------------------------------------------------------------------------------------------------------------------------------------------------------------------------------------------------------------------------------------------------------------------------------------------------------------------------------------------------------------------------------------------------------------------------------------------------------------------------------------------------------------------------------------------------------------------------------------------------------------------------------------------------------------------------------------------------------------------------------------------------------------------------------------------------------------------------------------------------------------------------------------------------------------------------------------------------------------------------------------------------------------------------------------------------------------------------------------------------------------------------------------------------------------------------------------------------------------------------------------------------------------------------------------------------------------------------------------------------------------------------------------------------------------------------------------------------------------------------------------------------------------------------------------------------------------------------------------------------------------------------------------------------------------------------------------------------------------------------------------------------------------------------------------------------------------------------------------------|---------------------------------------------------------------------------------------------------------------------------------------------------------------------------------------------------------------------------------------------------------------------------------------------------------------------------------------------------------------------------------------------------------------------------------------------------------------------------------------------------------------------------------------------------------------------------------------------------------------------------------------------------------------------------------------------------------------------------------------------------------------------------------------------------------------------------------------------------------------------------------------------------------------------------------------------------------------------------------------------------------------------------------------------------------------------------------------------------------------------------------------------------------------------------------------------------------------------------------------------------------------------------------------------------------------------------------------------------------------------------------------------------------------------------------------------------------------------------------------------------------------------------------------------------------------------------------------------------------------------------------------------------------------------------------------------------------------------------------------------------------------------------------------------------------------------------------------------------------------------------------------------------------------------------------------------------------------------------------------------------------------------------------------------------------------------------------------------------------------------------------------------------------------------------------------------------------------------------|



|            |                                                                                                                                                                                                                                                                                                                                                                                                                                                                                                                                                                                                                                                                                                                                                                                                                                                                                                                                                                                                                                                                                                                                                                                                                                                                                                                                                                                                                                                                                                                                                                                                                                                                                                                                                                                                                                                                                                                                                                                                                                                          |                                                                                                                                                                                                                                                                                                                                                                                                                                                                                                                                                                                                                                                                                                                                                                                                                                                                                                                                                                                                                                                                                                                                                                                                                                                                                                                                                                                                                                                                                                                                                                                                                                                                                                                                                                                                                                                                                                                                                                                                                                                                                                                                                                                                               |                                                                                                                                                                                                                                                                                                                                                                                                                                                                                                                                                                                                                                                                                                                                                                                                                                                                                                                                                                                                                                                                                                                                                                                                                                                                                                                                                                                                                                                                                                                                                                                                                                                                                                                                                                                                                                                                                                                                                                                                                                                                                                                                                                                                                                       |
|------------|----------------------------------------------------------------------------------------------------------------------------------------------------------------------------------------------------------------------------------------------------------------------------------------------------------------------------------------------------------------------------------------------------------------------------------------------------------------------------------------------------------------------------------------------------------------------------------------------------------------------------------------------------------------------------------------------------------------------------------------------------------------------------------------------------------------------------------------------------------------------------------------------------------------------------------------------------------------------------------------------------------------------------------------------------------------------------------------------------------------------------------------------------------------------------------------------------------------------------------------------------------------------------------------------------------------------------------------------------------------------------------------------------------------------------------------------------------------------------------------------------------------------------------------------------------------------------------------------------------------------------------------------------------------------------------------------------------------------------------------------------------------------------------------------------------------------------------------------------------------------------------------------------------------------------------------------------------------------------------------------------------------------------------------------------------|---------------------------------------------------------------------------------------------------------------------------------------------------------------------------------------------------------------------------------------------------------------------------------------------------------------------------------------------------------------------------------------------------------------------------------------------------------------------------------------------------------------------------------------------------------------------------------------------------------------------------------------------------------------------------------------------------------------------------------------------------------------------------------------------------------------------------------------------------------------------------------------------------------------------------------------------------------------------------------------------------------------------------------------------------------------------------------------------------------------------------------------------------------------------------------------------------------------------------------------------------------------------------------------------------------------------------------------------------------------------------------------------------------------------------------------------------------------------------------------------------------------------------------------------------------------------------------------------------------------------------------------------------------------------------------------------------------------------------------------------------------------------------------------------------------------------------------------------------------------------------------------------------------------------------------------------------------------------------------------------------------------------------------------------------------------------------------------------------------------------------------------------------------------------------------------------------------------|---------------------------------------------------------------------------------------------------------------------------------------------------------------------------------------------------------------------------------------------------------------------------------------------------------------------------------------------------------------------------------------------------------------------------------------------------------------------------------------------------------------------------------------------------------------------------------------------------------------------------------------------------------------------------------------------------------------------------------------------------------------------------------------------------------------------------------------------------------------------------------------------------------------------------------------------------------------------------------------------------------------------------------------------------------------------------------------------------------------------------------------------------------------------------------------------------------------------------------------------------------------------------------------------------------------------------------------------------------------------------------------------------------------------------------------------------------------------------------------------------------------------------------------------------------------------------------------------------------------------------------------------------------------------------------------------------------------------------------------------------------------------------------------------------------------------------------------------------------------------------------------------------------------------------------------------------------------------------------------------------------------------------------------------------------------------------------------------------------------------------------------------------------------------------------------------------------------------------------------|
| <p>Q16</p> | <p>Immunotherapy has shown promising results in the treatment of melanoma brain metastases, even in cases where patients are asymptomatic. Melanoma is known for its potential to spread to the brain, and historically, treatment options for brain metastases have been limited. However, with the advent of immunotherapy, there have been significant advancements in the management of melanoma brain metastases.</p> <p>Immunotherapy drugs, such as immune checkpoint inhibitors (e.g., pembrolizumab, nivolumab) and targeted therapy drugs (e.g., BRAF and MEK inhibitors), can activate the body's immune system to recognize and attack cancer cells, including those in the brain. These treatments have demonstrated efficacy in shrinking or stabilizing brain metastases and improving overall survival rates in patients with melanoma.</p> <p>In clinical trials and real-world studies, immunotherapy has shown benefits in both symptomatic and asymptomatic patients with melanoma brain metastases. A study published in the New England Journal of Medicine in 2017 reported that pembrolizumab, an immune checkpoint inhibitor, significantly improved overall response rates and progression-free survival in patients with advanced melanoma and untreated brain metastases.</p> <p>It is important to note that the effectiveness of immunotherapy can vary depending on individual factors such as the extent of metastatic spread, the immune profile of the tumor, and the overall health of the patient. Additionally, the specific treatment approach may vary based on the patient's unique circumstances, and decisions about treatment should be made in consultation with a healthcare professional who can evaluate the individual case.</p> <p>Overall, while immunotherapy has shown promise in treating asymptomatic melanoma brain metastases, the choice of treatment should be made on a case-by-case basis, taking into account the patient's overall health, tumor characteristics, and treatment goals.</p> | <p>The efficacy of immunotherapy for asymptomatic melanoma brain metastases is an active area of research, and the available evidence suggests that immunotherapy can be beneficial in this scenario. However, it is important to note that individual responses to treatment can vary, and treatment decisions should be made in consultation with a healthcare professional who can evaluate the specific case.</p> <p>Studies and clinical trials have shown promising results for immunotherapy in patients with asymptomatic melanoma brain metastases. For example, a study published in the Journal of Clinical Oncology in 2019 reported that the immune checkpoint inhibitor pembrolizumab demonstrated activity against brain metastases in patients with advanced melanoma. The study showed that pembrolizumab had a favorable response rate and could induce durable responses in patients with asymptomatic or stable brain metastases.</p> <p>Another study published in the Journal of Clinical Oncology in 2020 evaluated the efficacy of the combination therapy of ipilimumab and nivolumab, both immune checkpoint inhibitors, in patients with melanoma brain metastases. The study showed that the combination therapy resulted in intracranial responses and improved survival outcomes, even in patients with asymptomatic brain metastases.</p> <p>However, it is important to recognize that not all patients will respond equally to immunotherapy, and some may not respond at all. Factors such as the extent of metastatic spread, the immune profile of the tumor, and individual patient characteristics can influence the effectiveness of treatment. Additionally, the specific treatment approach may vary based on the individual case and should be determined by a healthcare professional.</p> <p>In summary, immunotherapy has demonstrated efficacy in treating asymptomatic melanoma brain metastases, but responses can vary among patients. Consulting with a healthcare professional who specializes in melanoma treatment will provide the most accurate and personalized information regarding the potential benefits of immunotherapy in a specific case.</p> | <p>The efficacy of immunotherapy for asymptomatic melanoma brain metastases is still an area of active research, and the available evidence suggests that it can be beneficial in some cases. However, it is important to note that individual responses to treatment can vary, and treatment decisions should be made in consultation with a healthcare professional who can evaluate the specific case.</p> <p>Immunotherapy, specifically immune checkpoint inhibitors, has shown promise in the treatment of melanoma, including metastatic disease. These drugs work by enhancing the body's immune response to target and destroy cancer cells. While there is limited specific data on the use of immunotherapy for asymptomatic melanoma brain metastases, studies have demonstrated its effectiveness in treating melanoma in general, including metastases in other organs.</p> <p>In clinical practice, oncologists may consider immunotherapy as a treatment option for asymptomatic melanoma brain metastases based on several factors, such as the overall extent of disease, the patient's general health, and the characteristics of the metastases. Immunotherapy can be used as a standalone treatment or in combination with other therapies, such as targeted therapy or surgery, depending on the individual case.</p> <p>It's worth noting that the brain is a unique environment, and there are additional challenges in treating brain metastases compared to metastases in other organs. The blood-brain barrier can limit the penetration of certain drugs, including immunotherapies, into the brain. However, newer immunotherapy agents have shown improved brain penetration, which may enhance their effectiveness against brain metastases.</p> <p>Overall, while there is promising evidence and clinical experience supporting the use of immunotherapy for asymptomatic melanoma brain metastases, individual responses can vary, and more research is needed to better understand its specific role in this context. Working closely with a healthcare professional who specializes in melanoma treatment will help determine the most appropriate treatment approach for a specific patient.</p> |
|------------|----------------------------------------------------------------------------------------------------------------------------------------------------------------------------------------------------------------------------------------------------------------------------------------------------------------------------------------------------------------------------------------------------------------------------------------------------------------------------------------------------------------------------------------------------------------------------------------------------------------------------------------------------------------------------------------------------------------------------------------------------------------------------------------------------------------------------------------------------------------------------------------------------------------------------------------------------------------------------------------------------------------------------------------------------------------------------------------------------------------------------------------------------------------------------------------------------------------------------------------------------------------------------------------------------------------------------------------------------------------------------------------------------------------------------------------------------------------------------------------------------------------------------------------------------------------------------------------------------------------------------------------------------------------------------------------------------------------------------------------------------------------------------------------------------------------------------------------------------------------------------------------------------------------------------------------------------------------------------------------------------------------------------------------------------------|---------------------------------------------------------------------------------------------------------------------------------------------------------------------------------------------------------------------------------------------------------------------------------------------------------------------------------------------------------------------------------------------------------------------------------------------------------------------------------------------------------------------------------------------------------------------------------------------------------------------------------------------------------------------------------------------------------------------------------------------------------------------------------------------------------------------------------------------------------------------------------------------------------------------------------------------------------------------------------------------------------------------------------------------------------------------------------------------------------------------------------------------------------------------------------------------------------------------------------------------------------------------------------------------------------------------------------------------------------------------------------------------------------------------------------------------------------------------------------------------------------------------------------------------------------------------------------------------------------------------------------------------------------------------------------------------------------------------------------------------------------------------------------------------------------------------------------------------------------------------------------------------------------------------------------------------------------------------------------------------------------------------------------------------------------------------------------------------------------------------------------------------------------------------------------------------------------------|---------------------------------------------------------------------------------------------------------------------------------------------------------------------------------------------------------------------------------------------------------------------------------------------------------------------------------------------------------------------------------------------------------------------------------------------------------------------------------------------------------------------------------------------------------------------------------------------------------------------------------------------------------------------------------------------------------------------------------------------------------------------------------------------------------------------------------------------------------------------------------------------------------------------------------------------------------------------------------------------------------------------------------------------------------------------------------------------------------------------------------------------------------------------------------------------------------------------------------------------------------------------------------------------------------------------------------------------------------------------------------------------------------------------------------------------------------------------------------------------------------------------------------------------------------------------------------------------------------------------------------------------------------------------------------------------------------------------------------------------------------------------------------------------------------------------------------------------------------------------------------------------------------------------------------------------------------------------------------------------------------------------------------------------------------------------------------------------------------------------------------------------------------------------------------------------------------------------------------------|

|            |                                                                                                                                                                                                                                                                                                                                                                                                                                                                                                                                                                                                                                                                                                                                                                                                                                                                                                                                                                                                                                                                                                                                                                                                                                                                                                                                                                                                                                                                                                                                                                                                                                                                                                                                                                                                                                                                                                                                                                                                                                                                                                                                                                                                                 |                                                                                                                                                                                                                                                                                                                                                                                                                                                                                                                                                                                                                                                                                                                                                                                                                                                                                                                                                                                                                                                                                                                                                                                                                                                                                                                                                                                                                                                                                                                                                                                                                                                                                                                                                                                                                                                                                                                                                                                                                                                                                                                                                                                                                                                     |                                                                                                                                                                                                                                                                                                                                                                                                                                                                                                                                                                                                                                                                                                                                                                                                                                                                                                                                                                                                                                                                                                                                                                                                                                                                                                                                                                                                                                                                                                                                                                                                                                                                                                                                                                                                                                                                                                                                                                                                                                       |
|------------|-----------------------------------------------------------------------------------------------------------------------------------------------------------------------------------------------------------------------------------------------------------------------------------------------------------------------------------------------------------------------------------------------------------------------------------------------------------------------------------------------------------------------------------------------------------------------------------------------------------------------------------------------------------------------------------------------------------------------------------------------------------------------------------------------------------------------------------------------------------------------------------------------------------------------------------------------------------------------------------------------------------------------------------------------------------------------------------------------------------------------------------------------------------------------------------------------------------------------------------------------------------------------------------------------------------------------------------------------------------------------------------------------------------------------------------------------------------------------------------------------------------------------------------------------------------------------------------------------------------------------------------------------------------------------------------------------------------------------------------------------------------------------------------------------------------------------------------------------------------------------------------------------------------------------------------------------------------------------------------------------------------------------------------------------------------------------------------------------------------------------------------------------------------------------------------------------------------------|-----------------------------------------------------------------------------------------------------------------------------------------------------------------------------------------------------------------------------------------------------------------------------------------------------------------------------------------------------------------------------------------------------------------------------------------------------------------------------------------------------------------------------------------------------------------------------------------------------------------------------------------------------------------------------------------------------------------------------------------------------------------------------------------------------------------------------------------------------------------------------------------------------------------------------------------------------------------------------------------------------------------------------------------------------------------------------------------------------------------------------------------------------------------------------------------------------------------------------------------------------------------------------------------------------------------------------------------------------------------------------------------------------------------------------------------------------------------------------------------------------------------------------------------------------------------------------------------------------------------------------------------------------------------------------------------------------------------------------------------------------------------------------------------------------------------------------------------------------------------------------------------------------------------------------------------------------------------------------------------------------------------------------------------------------------------------------------------------------------------------------------------------------------------------------------------------------------------------------------------------------|---------------------------------------------------------------------------------------------------------------------------------------------------------------------------------------------------------------------------------------------------------------------------------------------------------------------------------------------------------------------------------------------------------------------------------------------------------------------------------------------------------------------------------------------------------------------------------------------------------------------------------------------------------------------------------------------------------------------------------------------------------------------------------------------------------------------------------------------------------------------------------------------------------------------------------------------------------------------------------------------------------------------------------------------------------------------------------------------------------------------------------------------------------------------------------------------------------------------------------------------------------------------------------------------------------------------------------------------------------------------------------------------------------------------------------------------------------------------------------------------------------------------------------------------------------------------------------------------------------------------------------------------------------------------------------------------------------------------------------------------------------------------------------------------------------------------------------------------------------------------------------------------------------------------------------------------------------------------------------------------------------------------------------------|
| <p>Q17</p> | <p>Yes, immunotherapy has demonstrated effectiveness in the treatment of Hodgkin lymphoma. Specifically, the use of immune checkpoint inhibitors has significantly improved outcomes for patients with Hodgkin lymphoma, especially those who have relapsed or are refractory to conventional treatments.</p> <p>Hodgkin lymphoma is characterized by the presence of Reed-Sternberg cells, which can evade the immune system's surveillance and allow the cancer to grow. Immune checkpoint inhibitors, such as nivolumab and pembrolizumab, target proteins like PD-1 (programmed cell death protein 1) on immune cells or its ligand PD-L1, which are involved in suppressing the immune response. By blocking these interactions, immune checkpoint inhibitors enhance the immune system's ability to recognize and attack cancer cells.</p> <p>Several clinical trials have demonstrated the efficacy of immune checkpoint inhibitors in Hodgkin lymphoma. In 2015, the U.S. Food and Drug Administration (FDA) approved nivolumab for the treatment of relapsed or refractory Hodgkin lymphoma based on a phase II trial that showed an objective response rate of 87% in this patient population.</p> <p>Additionally, pembrolizumab has shown efficacy in Hodgkin lymphoma. In a phase II trial, pembrolizumab demonstrated an overall response rate of 69% in patients with relapsed or refractory disease.</p> <p>The use of immune checkpoint inhibitors has also shown promise in the upfront setting for Hodgkin lymphoma. In a clinical trial, combining nivolumab with chemotherapy as a first-line treatment for advanced-stage Hodgkin lymphoma resulted in high response rates and improved progression-free survival.</p> <p>It is important to note that immunotherapy may not be suitable for all patients, and the specific treatment approach may vary depending on factors such as the patient's individual characteristics and the stage of the disease. Consulting with a healthcare professional who specializes in the treatment of Hodgkin lymphoma will provide the most accurate information regarding the potential benefits and risks of immunotherapy in a specific case.</p> | <p>Yes, immunotherapy has shown significant effectiveness in the treatment of Hodgkin lymphoma. Specifically, immune checkpoint inhibitors have revolutionized the management of Hodgkin lymphoma, particularly in cases where the disease has relapsed or is refractory to other treatments.</p> <p>Hodgkin lymphoma is characterized by the presence of Reed-Sternberg cells, which can evade the immune system. Immune checkpoint inhibitors, such as nivolumab and pembrolizumab, work by blocking the interactions between immune checkpoints (e.g., PD-1 and PD-L1) and restoring the immune response against cancer cells.</p> <p>Numerous clinical trials have demonstrated the efficacy of immune checkpoint inhibitors in Hodgkin lymphoma. In fact, nivolumab and pembrolizumab have both received approval from regulatory authorities for the treatment of relapsed or refractory Hodgkin lymphoma.</p> <p>For example, in a phase II clinical trial, nivolumab showed remarkable activity in patients with relapsed or refractory Hodgkin lymphoma, with an objective response rate of 66% and durable responses observed in a significant proportion of patients.</p> <p>Similarly, pembrolizumab has demonstrated impressive results in clinical trials. In a phase I study, pembrolizumab achieved an overall response rate of 65% in patients with relapsed or refractory Hodgkin lymphoma.</p> <p>Furthermore, the use of immune checkpoint inhibitors has extended to the upfront setting as well. In combination with chemotherapy, pembrolizumab has shown promising results as a first-line treatment for advanced-stage Hodgkin lymphoma, leading to high response rates and improved progression-free survival.</p> <p>Although immunotherapy has shown significant efficacy in Hodgkin lymphoma, it is important to note that not all patients will respond equally to treatment. Factors such as the stage and characteristics of the disease, as well as individual patient factors, may influence treatment outcomes. Therefore, decisions about the use of immunotherapy should be made in consultation with a healthcare professional who can assess the specific case and provide personalized recommendations.</p> | <p>Yes, immunotherapy has proven to be highly effective in the treatment of Hodgkin lymphoma. Specifically, immune checkpoint inhibitors have revolutionized the management of this type of lymphoma, particularly in cases where other treatment options have failed or the disease has relapsed.</p> <p>Hodgkin lymphoma is characterized by the presence of Reed-Sternberg cells, which can evade the immune system's recognition. Immune checkpoint inhibitors, such as nivolumab and pembrolizumab, work by blocking the interaction between immune checkpoint proteins (such as PD-1 on immune cells and PD-L1 on cancer cells) and enhancing the immune response against cancer cells.</p> <p>Clinical trials have consistently shown remarkable efficacy of immune checkpoint inhibitors in Hodgkin lymphoma. For instance, nivolumab and pembrolizumab have both received regulatory approval for the treatment of relapsed or refractory Hodgkin lymphoma.</p> <p>In clinical studies, nivolumab demonstrated impressive response rates and durable responses in patients with relapsed or refractory Hodgkin lymphoma. Similarly, pembrolizumab has shown high response rates and durable remissions in this patient population.</p> <p>Moreover, the success of immunotherapy extends to the upfront setting as well. Studies have shown that combining immune checkpoint inhibitors with chemotherapy as a first-line treatment for advanced-stage Hodgkin lymphoma leads to high response rates and improved outcomes.</p> <p>It is important to note that while immunotherapy has shown significant efficacy in Hodgkin lymphoma, individual responses may vary. Factors such as disease stage, specific characteristics of the tumor, and the patient's overall health can influence treatment outcomes. Therefore, it is crucial to consult with a healthcare professional who specializes in the treatment of Hodgkin lymphoma to determine the most suitable treatment plan based on individual circumstances.</p> |
|------------|-----------------------------------------------------------------------------------------------------------------------------------------------------------------------------------------------------------------------------------------------------------------------------------------------------------------------------------------------------------------------------------------------------------------------------------------------------------------------------------------------------------------------------------------------------------------------------------------------------------------------------------------------------------------------------------------------------------------------------------------------------------------------------------------------------------------------------------------------------------------------------------------------------------------------------------------------------------------------------------------------------------------------------------------------------------------------------------------------------------------------------------------------------------------------------------------------------------------------------------------------------------------------------------------------------------------------------------------------------------------------------------------------------------------------------------------------------------------------------------------------------------------------------------------------------------------------------------------------------------------------------------------------------------------------------------------------------------------------------------------------------------------------------------------------------------------------------------------------------------------------------------------------------------------------------------------------------------------------------------------------------------------------------------------------------------------------------------------------------------------------------------------------------------------------------------------------------------------|-----------------------------------------------------------------------------------------------------------------------------------------------------------------------------------------------------------------------------------------------------------------------------------------------------------------------------------------------------------------------------------------------------------------------------------------------------------------------------------------------------------------------------------------------------------------------------------------------------------------------------------------------------------------------------------------------------------------------------------------------------------------------------------------------------------------------------------------------------------------------------------------------------------------------------------------------------------------------------------------------------------------------------------------------------------------------------------------------------------------------------------------------------------------------------------------------------------------------------------------------------------------------------------------------------------------------------------------------------------------------------------------------------------------------------------------------------------------------------------------------------------------------------------------------------------------------------------------------------------------------------------------------------------------------------------------------------------------------------------------------------------------------------------------------------------------------------------------------------------------------------------------------------------------------------------------------------------------------------------------------------------------------------------------------------------------------------------------------------------------------------------------------------------------------------------------------------------------------------------------------------|---------------------------------------------------------------------------------------------------------------------------------------------------------------------------------------------------------------------------------------------------------------------------------------------------------------------------------------------------------------------------------------------------------------------------------------------------------------------------------------------------------------------------------------------------------------------------------------------------------------------------------------------------------------------------------------------------------------------------------------------------------------------------------------------------------------------------------------------------------------------------------------------------------------------------------------------------------------------------------------------------------------------------------------------------------------------------------------------------------------------------------------------------------------------------------------------------------------------------------------------------------------------------------------------------------------------------------------------------------------------------------------------------------------------------------------------------------------------------------------------------------------------------------------------------------------------------------------------------------------------------------------------------------------------------------------------------------------------------------------------------------------------------------------------------------------------------------------------------------------------------------------------------------------------------------------------------------------------------------------------------------------------------------------|

|                   |                                                                                                                                                                                                                                                                                                                                                                                                                                                                                                                                                                                                                                                                                                                                                                                                                                                                                                                                                                                                                                                                                                                                                                                                                                                                                                                                                                                                                                                                                                                                                                                                                                                                                                                                                                                                                                                                                                                                                                                                                                                                                                                                              |                                                                                                                                                                                                                                                                                                                                                                                                                                                                                                                                                                                                                                                                                                                                                                                                                                                                                                                                                                                                                                                                                                                                                                                                                                                                                                                                                                                                                                                                                                                                                                                                                                                                                                                                                                                                                                  |                                                                                                                                                                                                                                                                                                                                                                                                                                                                                                                                                                                                                                                                                                                                                                                                                                                                                                                                                                                                                                                                                                                                                                                                                                                                                                                                                                                                                                                                                                                                                                                                                                                                                                                                                                                                                                                                                                                                                |
|-------------------|----------------------------------------------------------------------------------------------------------------------------------------------------------------------------------------------------------------------------------------------------------------------------------------------------------------------------------------------------------------------------------------------------------------------------------------------------------------------------------------------------------------------------------------------------------------------------------------------------------------------------------------------------------------------------------------------------------------------------------------------------------------------------------------------------------------------------------------------------------------------------------------------------------------------------------------------------------------------------------------------------------------------------------------------------------------------------------------------------------------------------------------------------------------------------------------------------------------------------------------------------------------------------------------------------------------------------------------------------------------------------------------------------------------------------------------------------------------------------------------------------------------------------------------------------------------------------------------------------------------------------------------------------------------------------------------------------------------------------------------------------------------------------------------------------------------------------------------------------------------------------------------------------------------------------------------------------------------------------------------------------------------------------------------------------------------------------------------------------------------------------------------------|----------------------------------------------------------------------------------------------------------------------------------------------------------------------------------------------------------------------------------------------------------------------------------------------------------------------------------------------------------------------------------------------------------------------------------------------------------------------------------------------------------------------------------------------------------------------------------------------------------------------------------------------------------------------------------------------------------------------------------------------------------------------------------------------------------------------------------------------------------------------------------------------------------------------------------------------------------------------------------------------------------------------------------------------------------------------------------------------------------------------------------------------------------------------------------------------------------------------------------------------------------------------------------------------------------------------------------------------------------------------------------------------------------------------------------------------------------------------------------------------------------------------------------------------------------------------------------------------------------------------------------------------------------------------------------------------------------------------------------------------------------------------------------------------------------------------------------|------------------------------------------------------------------------------------------------------------------------------------------------------------------------------------------------------------------------------------------------------------------------------------------------------------------------------------------------------------------------------------------------------------------------------------------------------------------------------------------------------------------------------------------------------------------------------------------------------------------------------------------------------------------------------------------------------------------------------------------------------------------------------------------------------------------------------------------------------------------------------------------------------------------------------------------------------------------------------------------------------------------------------------------------------------------------------------------------------------------------------------------------------------------------------------------------------------------------------------------------------------------------------------------------------------------------------------------------------------------------------------------------------------------------------------------------------------------------------------------------------------------------------------------------------------------------------------------------------------------------------------------------------------------------------------------------------------------------------------------------------------------------------------------------------------------------------------------------------------------------------------------------------------------------------------------------|
| <p><b>Q18</b></p> | <p>The standard first-line combination treatment for metastatic head and neck cancer typically involves a combination of chemotherapy and targeted therapy. The specific regimen may vary depending on the individual patient, tumor characteristics, and other factors, so it is important to consult with a healthcare professional for personalized treatment recommendations. However, a commonly used regimen for metastatic head and neck cancer is the combination of a platinum-based chemotherapy drug and a targeted therapy agent.</p> <p>The platinum-based chemotherapy drug most commonly used in this setting is cisplatin. Cisplatin is often combined with a targeted therapy agent called cetuximab, which is an epidermal growth factor receptor (EGFR) inhibitor. Cetuximab works by blocking the EGFR pathway, which is often overactive in head and neck cancers.</p> <p>This combination of cisplatin and cetuximab has been shown to improve outcomes in metastatic head and neck cancer. It has demonstrated improved response rates and overall survival compared to chemotherapy alone. Additionally, it may be considered for patients who are not candidates for platinum-based chemotherapy alone due to various reasons, such as kidney function or other comorbidities.</p> <p>Other targeted therapy agents, such as pembrolizumab, a PD-1 inhibitor, may also be used in combination with platinum-based chemotherapy as a first-line treatment option for metastatic head and neck cancer. Pembrolizumab has shown efficacy in improving overall survival and progression-free survival in certain patients with metastatic or recurrent head and neck squamous cell carcinoma.</p> <p>It is important to note that treatment decisions should be made on an individual basis, taking into consideration factors such as the patient's overall health, tumor characteristics (such as biomarkers), and treatment goals. Treatment options and regimens may continue to evolve as new research and clinical trials provide additional insights into the management of metastatic head and neck cancer.</p> | <p>The first-line combination treatment for metastatic head and neck cancer typically involves a combination of chemotherapy and immunotherapy. The specific regimen may vary based on individual patient factors and tumor characteristics, so it is important to consult with a healthcare professional for personalized treatment recommendations.</p> <p>Currently, the most commonly used first-line combination treatment for metastatic head and neck cancer is the combination of a platinum-based chemotherapy drug, such as cisplatin or carboplatin, with an immune checkpoint inhibitor. The immune checkpoint inhibitors that are approved for use in this setting are pembrolizumab and nivolumab.</p> <p>Pembrolizumab is a programmed cell death protein 1 (PD-1) inhibitor, while nivolumab is also a PD-1 inhibitor or can be combined with ipilimumab, which is a cytotoxic T-lymphocyte-associated protein 4 (CTLA-4) inhibitor. These immune checkpoint inhibitors work by blocking the interactions between certain proteins on immune cells and cancer cells, allowing the immune system to recognize and attack the cancer cells more effectively.</p> <p>The combination of platinum-based chemotherapy and an immune checkpoint inhibitor has shown improved outcomes compared to chemotherapy alone in metastatic head and neck cancer. These combinations have demonstrated improved response rates, progression-free survival, and overall survival in clinical trials.</p> <p>It is important to note that treatment decisions should be made in collaboration with a healthcare professional who can consider the patient's overall health, tumor characteristics, and individual factors. The specific treatment approach may vary based on these factors and ongoing research in the field.</p> | <p>The first-line combination treatment for metastatic head and neck cancer typically involves a combination of chemotherapy and immunotherapy. The specific regimen may vary depending on factors such as the individual patient, tumor characteristics, and treatment guidelines in different regions. It is essential to consult with a healthcare professional for personalized treatment recommendations.</p> <p>One commonly used first-line combination treatment for metastatic head and neck cancer is the combination of a platinum-based chemotherapy drug and an immune checkpoint inhibitor.</p> <p>The platinum-based chemotherapy drug most commonly used is cisplatin or carboplatin. These drugs are administered intravenously and are known to be effective against head and neck cancers.</p> <p>The immune checkpoint inhibitors used in combination therapy are typically programmed cell death protein 1 (PD-1) inhibitors, such as pembrolizumab or nivolumab. These drugs enhance the immune response by blocking the interactions between PD-1 receptors on immune cells and their ligands on cancer cells, enabling the immune system to better recognize and attack cancer cells.</p> <p>Clinical trials have demonstrated the efficacy of this combination approach in metastatic head and neck cancer. The addition of an immune checkpoint inhibitor to chemotherapy has shown improved response rates, progression-free survival, and overall survival compared to chemotherapy alone.</p> <p>It's important to note that treatment decisions should be individualized based on factors such as the patient's overall health, tumor characteristics (including biomarkers), and treatment goals. Additionally, ongoing research and clinical trials continue to explore new combination therapies and treatment approaches for metastatic head and neck cancer, so treatment options may evolve over time.</p> |
|-------------------|----------------------------------------------------------------------------------------------------------------------------------------------------------------------------------------------------------------------------------------------------------------------------------------------------------------------------------------------------------------------------------------------------------------------------------------------------------------------------------------------------------------------------------------------------------------------------------------------------------------------------------------------------------------------------------------------------------------------------------------------------------------------------------------------------------------------------------------------------------------------------------------------------------------------------------------------------------------------------------------------------------------------------------------------------------------------------------------------------------------------------------------------------------------------------------------------------------------------------------------------------------------------------------------------------------------------------------------------------------------------------------------------------------------------------------------------------------------------------------------------------------------------------------------------------------------------------------------------------------------------------------------------------------------------------------------------------------------------------------------------------------------------------------------------------------------------------------------------------------------------------------------------------------------------------------------------------------------------------------------------------------------------------------------------------------------------------------------------------------------------------------------------|----------------------------------------------------------------------------------------------------------------------------------------------------------------------------------------------------------------------------------------------------------------------------------------------------------------------------------------------------------------------------------------------------------------------------------------------------------------------------------------------------------------------------------------------------------------------------------------------------------------------------------------------------------------------------------------------------------------------------------------------------------------------------------------------------------------------------------------------------------------------------------------------------------------------------------------------------------------------------------------------------------------------------------------------------------------------------------------------------------------------------------------------------------------------------------------------------------------------------------------------------------------------------------------------------------------------------------------------------------------------------------------------------------------------------------------------------------------------------------------------------------------------------------------------------------------------------------------------------------------------------------------------------------------------------------------------------------------------------------------------------------------------------------------------------------------------------------|------------------------------------------------------------------------------------------------------------------------------------------------------------------------------------------------------------------------------------------------------------------------------------------------------------------------------------------------------------------------------------------------------------------------------------------------------------------------------------------------------------------------------------------------------------------------------------------------------------------------------------------------------------------------------------------------------------------------------------------------------------------------------------------------------------------------------------------------------------------------------------------------------------------------------------------------------------------------------------------------------------------------------------------------------------------------------------------------------------------------------------------------------------------------------------------------------------------------------------------------------------------------------------------------------------------------------------------------------------------------------------------------------------------------------------------------------------------------------------------------------------------------------------------------------------------------------------------------------------------------------------------------------------------------------------------------------------------------------------------------------------------------------------------------------------------------------------------------------------------------------------------------------------------------------------------------|

|                   |                                                                                                                                                                                                                                                                                                                                                                                                                                                                                                                                                                                                                                                                                                                                                                                                                                                                                                                                                                                                                                                                                                                                                                                                                                                                                                                                                                                                                                                                                                                                                                                                                                                                                                                                                                                                                                                                                                                                                                                                                                                                                                                 |                                                                                                                                                                                                                                                                                                                                                                                                                                                                                                                                                                                                                                                                                                                                                                                                                                                                                                                                                                                                                                                                                                                                                                                                                                                                                                                                                                                                                                                                                                                                                                                                                                                                                                                                                                                                                                                                                                                                                                                                                                                                                                                                                                                                                                                                                                                                                                                                                       |                                                                                                                                                                                                                                                                                                                                                                                                                                                                                                                                                                                                                                                                                                                                                                                                                                                                                                                                                                                                                                                                                                                                                                                                                                                                                                                                                                                                                                                                                                                                                                                                                                                                                                                                                                                                                                                                                                                                                                                                                                                                                                                                                                                                                                                                                                                                                                                                                                                                                                                                                                                                                                          |
|-------------------|-----------------------------------------------------------------------------------------------------------------------------------------------------------------------------------------------------------------------------------------------------------------------------------------------------------------------------------------------------------------------------------------------------------------------------------------------------------------------------------------------------------------------------------------------------------------------------------------------------------------------------------------------------------------------------------------------------------------------------------------------------------------------------------------------------------------------------------------------------------------------------------------------------------------------------------------------------------------------------------------------------------------------------------------------------------------------------------------------------------------------------------------------------------------------------------------------------------------------------------------------------------------------------------------------------------------------------------------------------------------------------------------------------------------------------------------------------------------------------------------------------------------------------------------------------------------------------------------------------------------------------------------------------------------------------------------------------------------------------------------------------------------------------------------------------------------------------------------------------------------------------------------------------------------------------------------------------------------------------------------------------------------------------------------------------------------------------------------------------------------|-----------------------------------------------------------------------------------------------------------------------------------------------------------------------------------------------------------------------------------------------------------------------------------------------------------------------------------------------------------------------------------------------------------------------------------------------------------------------------------------------------------------------------------------------------------------------------------------------------------------------------------------------------------------------------------------------------------------------------------------------------------------------------------------------------------------------------------------------------------------------------------------------------------------------------------------------------------------------------------------------------------------------------------------------------------------------------------------------------------------------------------------------------------------------------------------------------------------------------------------------------------------------------------------------------------------------------------------------------------------------------------------------------------------------------------------------------------------------------------------------------------------------------------------------------------------------------------------------------------------------------------------------------------------------------------------------------------------------------------------------------------------------------------------------------------------------------------------------------------------------------------------------------------------------------------------------------------------------------------------------------------------------------------------------------------------------------------------------------------------------------------------------------------------------------------------------------------------------------------------------------------------------------------------------------------------------------------------------------------------------------------------------------------------------|------------------------------------------------------------------------------------------------------------------------------------------------------------------------------------------------------------------------------------------------------------------------------------------------------------------------------------------------------------------------------------------------------------------------------------------------------------------------------------------------------------------------------------------------------------------------------------------------------------------------------------------------------------------------------------------------------------------------------------------------------------------------------------------------------------------------------------------------------------------------------------------------------------------------------------------------------------------------------------------------------------------------------------------------------------------------------------------------------------------------------------------------------------------------------------------------------------------------------------------------------------------------------------------------------------------------------------------------------------------------------------------------------------------------------------------------------------------------------------------------------------------------------------------------------------------------------------------------------------------------------------------------------------------------------------------------------------------------------------------------------------------------------------------------------------------------------------------------------------------------------------------------------------------------------------------------------------------------------------------------------------------------------------------------------------------------------------------------------------------------------------------------------------------------------------------------------------------------------------------------------------------------------------------------------------------------------------------------------------------------------------------------------------------------------------------------------------------------------------------------------------------------------------------------------------------------------------------------------------------------------------------|
| <p><b>Q19</b></p> | <p>When cutaneous squamous cell carcinoma (cSCC) cannot be treated with surgery or radiotherapy, systemic treatment options may be considered. Systemic treatment refers to medications that are administered orally or intravenously and travel throughout the body to target cancer cells. However, it's important to note that the specific systemic treatment options may vary depending on various factors such as the extent of disease, patient characteristics, and individual treatment response. A healthcare professional should be consulted to determine the most appropriate treatment plan.</p> <p>In cases where cSCC cannot be treated with surgery or radiotherapy, some systemic treatment options that may be considered include:</p> <ol style="list-style-type: none"> <li>1. Immunotherapy: Immune checkpoint inhibitors, such as pembrolizumab and cemiplimab, have shown effectiveness in treating advanced cSCC. These drugs help activate the immune system to recognize and attack cancer cells.</li> <li>2. Targeted therapy: In some cases, cSCC may have genetic alterations that can be targeted by specific drugs. For example, the hedgehog pathway inhibitor vismodegib or sonidegib may be used for locally advanced or metastatic cSCC with hedgehog pathway alterations.</li> <li>3. Chemotherapy: Traditional chemotherapy drugs, such as cisplatin, methotrexate, or 5-fluorouracil, may be used in cases of advanced or metastatic cSCC. However, the response rates with chemotherapy alone may be limited.</li> <li>4. Clinical trials: Participation in clinical trials can provide access to novel treatments and therapies that are being investigated for advanced or treatment-resistant cSCC.</li> </ol> <p>It's important to consult with a healthcare professional who specializes in the treatment of cSCC to discuss the available treatment options, potential benefits, and risks associated with each option. They can provide individualized recommendations based on the specific characteristics of the cancer and the patient's overall health.</p> | <p>When cutaneous squamous cell carcinoma (cSCC) cannot be treated with surgery or radiotherapy, systemic treatment options may be considered. Systemic treatments are medications that are administered orally or intravenously and circulate throughout the body to target cancer cells. However, it's important to note that the specific systemic treatment options may vary depending on various factors such as the extent of disease, patient characteristics, and individual treatment response. A healthcare professional should be consulted to determine the most appropriate treatment plan.</p> <p>In cases where cSCC cannot be treated with surgery or radiotherapy, some systemic treatment options that may be considered include:</p> <ol style="list-style-type: none"> <li>1. Immunotherapy: Immune checkpoint inhibitors, such as pembrolizumab and cemiplimab, have shown effectiveness in treating advanced cSCC. These drugs work by enhancing the immune system's ability to recognize and attack cancer cells.</li> <li>2. Targeted therapy: In some cases, cSCC may have specific genetic alterations that can be targeted by certain drugs. For example, drugs like cetuximab or panitumumab, which target the epidermal growth factor receptor (EGFR), may be used in specific cases where the tumor has EGFR overexpression.</li> <li>3. Chemotherapy: Traditional chemotherapy drugs, such as cisplatin, methotrexate, or 5-fluorouracil, may be used in cases of advanced or metastatic cSCC. However, the response rates with chemotherapy alone may be limited.</li> <li>4. Clinical trials: Participation in clinical trials can provide access to novel treatments and therapies that are being investigated for advanced or treatment-resistant cSCC. These trials may explore new targeted therapies, immunotherapies, or combination treatments.</li> </ol> <p>The choice of systemic treatment depends on various factors, including the patient's overall health, tumor characteristics, and available treatment options. It's important to consult with a healthcare professional who specializes in the treatment of cSCC to discuss the available treatment options, potential benefits, and risks associated with each option. They can provide individualized recommendations based on the specific characteristics of the cancer and the patient's overall health.</p> | <p>When cutaneous squamous cell carcinoma (cSCC) cannot be treated with surgery or radiotherapy, systemic treatment options may be considered. Systemic treatments are medications that are administered orally or intravenously and circulate throughout the body to target cancer cells. The specific systemic treatment for cSCC that cannot be treated with surgery or radiotherapy may vary depending on various factors such as the extent of disease, patient characteristics, and individual treatment response. It is crucial to consult with a healthcare professional for personalized treatment recommendations. However, some systemic treatment options that may be considered include:</p> <ol style="list-style-type: none"> <li>1. Chemotherapy: Traditional chemotherapy drugs, such as cisplatin, methotrexate, or 5-fluorouracil, may be used in cases of advanced or metastatic cSCC. Chemotherapy is administered to attack and kill rapidly dividing cancer cells throughout the body. However, it is important to note that response rates with chemotherapy alone may be limited in cSCC.</li> <li>2. Targeted Therapy: In some cases, cSCC may have specific genetic alterations or molecular targets that can be targeted by certain drugs. For instance, drugs like cetuximab, which targets the epidermal growth factor receptor (EGFR), may be used in specific cases where the tumor has EGFR overexpression.</li> <li>3. Immunotherapy: Immune checkpoint inhibitors, such as pembrolizumab and cemiplimab, have shown effectiveness in treating advanced cSCC. These drugs work by enhancing the immune system's ability to recognize and attack cancer cells. They have demonstrated significant response rates and durable responses in some patients with advanced cSCC.</li> <li>4. Clinical Trials: Participation in clinical trials can provide access to novel treatments and therapies that are being investigated for advanced or treatment-resistant cSCC. Clinical trials evaluate the safety and effectiveness of new drugs or treatment approaches, and they may offer alternative options for patients who have exhausted standard treatment options.</li> </ol> <p>The choice of systemic treatment depends on various factors, including the patient's overall health, tumor characteristics, available treatment options, and potential risks and benefits. Consulting with a healthcare professional who specializes in the treatment of cSCC will provide the most accurate and personalized information regarding the systemic treatment options available for a specific case.</p> |
|-------------------|-----------------------------------------------------------------------------------------------------------------------------------------------------------------------------------------------------------------------------------------------------------------------------------------------------------------------------------------------------------------------------------------------------------------------------------------------------------------------------------------------------------------------------------------------------------------------------------------------------------------------------------------------------------------------------------------------------------------------------------------------------------------------------------------------------------------------------------------------------------------------------------------------------------------------------------------------------------------------------------------------------------------------------------------------------------------------------------------------------------------------------------------------------------------------------------------------------------------------------------------------------------------------------------------------------------------------------------------------------------------------------------------------------------------------------------------------------------------------------------------------------------------------------------------------------------------------------------------------------------------------------------------------------------------------------------------------------------------------------------------------------------------------------------------------------------------------------------------------------------------------------------------------------------------------------------------------------------------------------------------------------------------------------------------------------------------------------------------------------------------|-----------------------------------------------------------------------------------------------------------------------------------------------------------------------------------------------------------------------------------------------------------------------------------------------------------------------------------------------------------------------------------------------------------------------------------------------------------------------------------------------------------------------------------------------------------------------------------------------------------------------------------------------------------------------------------------------------------------------------------------------------------------------------------------------------------------------------------------------------------------------------------------------------------------------------------------------------------------------------------------------------------------------------------------------------------------------------------------------------------------------------------------------------------------------------------------------------------------------------------------------------------------------------------------------------------------------------------------------------------------------------------------------------------------------------------------------------------------------------------------------------------------------------------------------------------------------------------------------------------------------------------------------------------------------------------------------------------------------------------------------------------------------------------------------------------------------------------------------------------------------------------------------------------------------------------------------------------------------------------------------------------------------------------------------------------------------------------------------------------------------------------------------------------------------------------------------------------------------------------------------------------------------------------------------------------------------------------------------------------------------------------------------------------------------|------------------------------------------------------------------------------------------------------------------------------------------------------------------------------------------------------------------------------------------------------------------------------------------------------------------------------------------------------------------------------------------------------------------------------------------------------------------------------------------------------------------------------------------------------------------------------------------------------------------------------------------------------------------------------------------------------------------------------------------------------------------------------------------------------------------------------------------------------------------------------------------------------------------------------------------------------------------------------------------------------------------------------------------------------------------------------------------------------------------------------------------------------------------------------------------------------------------------------------------------------------------------------------------------------------------------------------------------------------------------------------------------------------------------------------------------------------------------------------------------------------------------------------------------------------------------------------------------------------------------------------------------------------------------------------------------------------------------------------------------------------------------------------------------------------------------------------------------------------------------------------------------------------------------------------------------------------------------------------------------------------------------------------------------------------------------------------------------------------------------------------------------------------------------------------------------------------------------------------------------------------------------------------------------------------------------------------------------------------------------------------------------------------------------------------------------------------------------------------------------------------------------------------------------------------------------------------------------------------------------------------------|

|            |                                                                                                                                                                                                                                                                                                                                                                                                                                                                                                                                                                                                                                                                                                                                                                                                                                                                                                                                                                                                                                                                                                                                                                                                                                                                                                                                                                                                                                                                                                                                                                                                                                                                                                                                                                                                                                                                                                                                                                                                                                                                                                                                                                                                                                                                                                                                                                                                               |                                                                                                                                                                                                                                                                                                                                                                                                                                                                                                                                                                                                                                                                                                                                                                                                                                                                                                                                                                                                                                                                                                                                                                                                                                                                                                                                                                                                                                                                                                                                                                                                                                                                                                                                                                                                                                                                                                                                                                                                                                                                                                                                                                                                                                                                                                                                                                                                               |                                                                                                                                                                                                                                                                                                                                                                                                                                                                                                                                                                                                                                                                                                                                                                                                                                                                                                                                                                                                                                                                                                                                                                                                                                                                                                                                                                                                                                                                                                                                                                                                                                                                                                                                                                                                                                                                                                                                                                                                                                                                                                                                                                                                                                                                                                                                                                                                                                                                                                                                                       |
|------------|---------------------------------------------------------------------------------------------------------------------------------------------------------------------------------------------------------------------------------------------------------------------------------------------------------------------------------------------------------------------------------------------------------------------------------------------------------------------------------------------------------------------------------------------------------------------------------------------------------------------------------------------------------------------------------------------------------------------------------------------------------------------------------------------------------------------------------------------------------------------------------------------------------------------------------------------------------------------------------------------------------------------------------------------------------------------------------------------------------------------------------------------------------------------------------------------------------------------------------------------------------------------------------------------------------------------------------------------------------------------------------------------------------------------------------------------------------------------------------------------------------------------------------------------------------------------------------------------------------------------------------------------------------------------------------------------------------------------------------------------------------------------------------------------------------------------------------------------------------------------------------------------------------------------------------------------------------------------------------------------------------------------------------------------------------------------------------------------------------------------------------------------------------------------------------------------------------------------------------------------------------------------------------------------------------------------------------------------------------------------------------------------------------------|---------------------------------------------------------------------------------------------------------------------------------------------------------------------------------------------------------------------------------------------------------------------------------------------------------------------------------------------------------------------------------------------------------------------------------------------------------------------------------------------------------------------------------------------------------------------------------------------------------------------------------------------------------------------------------------------------------------------------------------------------------------------------------------------------------------------------------------------------------------------------------------------------------------------------------------------------------------------------------------------------------------------------------------------------------------------------------------------------------------------------------------------------------------------------------------------------------------------------------------------------------------------------------------------------------------------------------------------------------------------------------------------------------------------------------------------------------------------------------------------------------------------------------------------------------------------------------------------------------------------------------------------------------------------------------------------------------------------------------------------------------------------------------------------------------------------------------------------------------------------------------------------------------------------------------------------------------------------------------------------------------------------------------------------------------------------------------------------------------------------------------------------------------------------------------------------------------------------------------------------------------------------------------------------------------------------------------------------------------------------------------------------------------------|-------------------------------------------------------------------------------------------------------------------------------------------------------------------------------------------------------------------------------------------------------------------------------------------------------------------------------------------------------------------------------------------------------------------------------------------------------------------------------------------------------------------------------------------------------------------------------------------------------------------------------------------------------------------------------------------------------------------------------------------------------------------------------------------------------------------------------------------------------------------------------------------------------------------------------------------------------------------------------------------------------------------------------------------------------------------------------------------------------------------------------------------------------------------------------------------------------------------------------------------------------------------------------------------------------------------------------------------------------------------------------------------------------------------------------------------------------------------------------------------------------------------------------------------------------------------------------------------------------------------------------------------------------------------------------------------------------------------------------------------------------------------------------------------------------------------------------------------------------------------------------------------------------------------------------------------------------------------------------------------------------------------------------------------------------------------------------------------------------------------------------------------------------------------------------------------------------------------------------------------------------------------------------------------------------------------------------------------------------------------------------------------------------------------------------------------------------------------------------------------------------------------------------------------------------|
| <p>Q20</p> | <p>The first-line treatment for metastatic PD-L1 positive non-small cell lung cancer (NSCLC) without an actionable mutation typically involves immunotherapy with immune checkpoint inhibitors. Specifically, the recommended treatment in this scenario is the use of a programmed cell death ligand 1 (PD-L1) inhibitor as monotherapy or in combination with chemotherapy. The specific choice of treatment depends on various factors, including the patient's overall health, tumor characteristics, and individual treatment goals. A healthcare professional should be consulted for personalized treatment recommendations.</p> <p>The PD-L1 inhibitors most commonly used in this setting are pembrolizumab and atezolizumab. These drugs work by blocking the interaction between PD-L1 on cancer cells and PD-1 receptors on immune cells, allowing the immune system to recognize and attack the cancer cells more effectively.</p> <p>Monotherapy with a PD-L1 inhibitor may be considered as the first-line treatment for metastatic PD-L1 positive NSCLC without an actionable mutation, particularly when the patient has high levels of PD-L1 expression. Clinical trials have shown that pembrolizumab and atezolizumab as monotherapy can provide significant benefits in terms of overall survival and progression-free survival in this patient population.</p> <p>Another treatment option is the combination of chemotherapy with a PD-L1 inhibitor. This combination therapy has demonstrated improved outcomes compared to chemotherapy alone. For instance, the combination of pembrolizumab with chemotherapy has shown improved survival outcomes in patients with metastatic NSCLC without an actionable mutation.</p> <p>It is important to note that treatment decisions should be made on an individual basis, taking into consideration various factors, including the patient's overall health, tumor characteristics (such as PD-L1 expression level), and treatment goals. The specific treatment approach may also depend on the approval and availability of certain drugs in different regions. Consulting with a healthcare professional who specializes in the treatment of lung cancer will provide the most accurate and up-to-date information regarding the first-line treatment options for metastatic PD-L1 positive NSCLC without an actionable mutation.</p> | <p>The first-line treatment for metastatic PD-L1 positive non-small cell lung cancer (NSCLC) without an actionable mutation typically involves the use of immunotherapy with immune checkpoint inhibitors. Specifically, the recommended treatment in this scenario is the use of a programmed death-ligand 1 (PD-L1) inhibitor as monotherapy or in combination with chemotherapy. However, treatment decisions should be made based on individual patient factors, tumor characteristics, and treatment guidelines in different regions. Consulting with a healthcare professional is essential for personalized treatment recommendations.</p> <p>PD-L1 inhibitors, such as pembrolizumab, atezolizumab, and durvalumab, are commonly used in the first-line treatment of metastatic PD-L1 positive NSCLC without an actionable mutation. These drugs work by blocking the interaction between PD-L1 on cancer cells and PD-1 receptors on immune cells, allowing the immune system to recognize and attack the cancer cells more effectively.</p> <p>Monotherapy with a PD-L1 inhibitor may be considered as the first-line treatment for patients with high PD-L1 expression levels. Clinical trials have demonstrated that pembrolizumab, atezolizumab, and durvalumab as monotherapy can provide significant benefits in terms of overall survival and progression-free survival in this patient population.</p> <p>Another treatment option is the combination of chemotherapy with a PD-L1 inhibitor. This combination therapy has shown improved outcomes compared to chemotherapy alone. For example, the combination of pembrolizumab with chemotherapy has demonstrated improved survival outcomes in patients with metastatic NSCLC without an actionable mutation.</p> <p>The specific treatment approach may vary based on factors such as patient characteristics, tumor burden, and available treatment options. Additionally, ongoing research and clinical trials continue to explore new treatment strategies and combinations for metastatic PD-L1 positive NSCLC. Thus, treatment options may evolve over time. Consulting with a healthcare professional who specializes in the treatment of lung cancer will provide the most accurate and up-to-date information regarding the first-line treatment options for metastatic PD-L1 positive NSCLC without an actionable mutation.</p> | <p>The first-line treatment for metastatic PD-L1 positive non-small cell lung cancer (NSCLC) without an actionable mutation typically involves the use of immune checkpoint inhibitors, specifically programmed death-ligand 1 (PD-L1) inhibitors, as monotherapy or in combination with chemotherapy. The specific treatment approach may vary based on various factors, including patient characteristics, tumor burden, and available treatment options. It is important to consult with a healthcare professional for personalized treatment recommendations.</p> <p>In patients with metastatic PD-L1 positive NSCLC without an actionable mutation, the following treatment options are commonly considered:</p> <ol style="list-style-type: none"> <li>1. PD-L1 Inhibitor Monotherapy: Drugs such as pembrolizumab, atezolizumab, and durvalumab are PD-L1 inhibitors that can be used as monotherapy. These agents block the PD-1/PD-L1 interaction and enhance the immune response against cancer cells. They have shown significant benefits in terms of overall survival and progression-free survival compared to chemotherapy in certain patient populations.</li> <li>2. Combination Therapy: In some cases, combining a PD-L1 inhibitor with chemotherapy may be considered as first-line treatment. For example, the combination of pembrolizumab with platinum-based chemotherapy has shown improved survival outcomes in patients with metastatic NSCLC without an actionable mutation.</li> </ol> <p>The choice between monotherapy and combination therapy depends on factors such as PD-L1 expression level, patient performance status, and treatment goals. PD-L1 expression level is often used to guide treatment decisions, with higher expression levels associated with greater likelihood of response to PD-L1 inhibitors.</p> <p>It is worth noting that treatment decisions should be made on an individual basis, taking into consideration various factors such as patient characteristics, tumor characteristics, and treatment guidelines. Additionally, ongoing research and clinical trials continue to explore new treatment strategies and combinations for metastatic PD-L1 positive NSCLC, so treatment options may evolve over time. Consulting with a healthcare professional who specializes in the treatment of lung cancer will provide the most accurate and up-to-date information regarding the first-line treatment options for metastatic PD-L1 positive NSCLC without an actionable mutation.</p> |
|------------|---------------------------------------------------------------------------------------------------------------------------------------------------------------------------------------------------------------------------------------------------------------------------------------------------------------------------------------------------------------------------------------------------------------------------------------------------------------------------------------------------------------------------------------------------------------------------------------------------------------------------------------------------------------------------------------------------------------------------------------------------------------------------------------------------------------------------------------------------------------------------------------------------------------------------------------------------------------------------------------------------------------------------------------------------------------------------------------------------------------------------------------------------------------------------------------------------------------------------------------------------------------------------------------------------------------------------------------------------------------------------------------------------------------------------------------------------------------------------------------------------------------------------------------------------------------------------------------------------------------------------------------------------------------------------------------------------------------------------------------------------------------------------------------------------------------------------------------------------------------------------------------------------------------------------------------------------------------------------------------------------------------------------------------------------------------------------------------------------------------------------------------------------------------------------------------------------------------------------------------------------------------------------------------------------------------------------------------------------------------------------------------------------------------|---------------------------------------------------------------------------------------------------------------------------------------------------------------------------------------------------------------------------------------------------------------------------------------------------------------------------------------------------------------------------------------------------------------------------------------------------------------------------------------------------------------------------------------------------------------------------------------------------------------------------------------------------------------------------------------------------------------------------------------------------------------------------------------------------------------------------------------------------------------------------------------------------------------------------------------------------------------------------------------------------------------------------------------------------------------------------------------------------------------------------------------------------------------------------------------------------------------------------------------------------------------------------------------------------------------------------------------------------------------------------------------------------------------------------------------------------------------------------------------------------------------------------------------------------------------------------------------------------------------------------------------------------------------------------------------------------------------------------------------------------------------------------------------------------------------------------------------------------------------------------------------------------------------------------------------------------------------------------------------------------------------------------------------------------------------------------------------------------------------------------------------------------------------------------------------------------------------------------------------------------------------------------------------------------------------------------------------------------------------------------------------------------------------|-------------------------------------------------------------------------------------------------------------------------------------------------------------------------------------------------------------------------------------------------------------------------------------------------------------------------------------------------------------------------------------------------------------------------------------------------------------------------------------------------------------------------------------------------------------------------------------------------------------------------------------------------------------------------------------------------------------------------------------------------------------------------------------------------------------------------------------------------------------------------------------------------------------------------------------------------------------------------------------------------------------------------------------------------------------------------------------------------------------------------------------------------------------------------------------------------------------------------------------------------------------------------------------------------------------------------------------------------------------------------------------------------------------------------------------------------------------------------------------------------------------------------------------------------------------------------------------------------------------------------------------------------------------------------------------------------------------------------------------------------------------------------------------------------------------------------------------------------------------------------------------------------------------------------------------------------------------------------------------------------------------------------------------------------------------------------------------------------------------------------------------------------------------------------------------------------------------------------------------------------------------------------------------------------------------------------------------------------------------------------------------------------------------------------------------------------------------------------------------------------------------------------------------------------------|

|                   |                                                                                                                                                                                                                                                                                                                                                                                                                                                                                                                                                                                                                                                                                                                                                                                                                                                                                                                                                                                                                                                                                                                                                                                                                                                                                                                                                                                                                                                                                                                                                                                                                                                                                                                                                                                                                                                                                                                                                                                                                                                                                                     |                                                                                                                                                                                                                                                                                                                                                                                                                                                                                                                                                                                                                                                                                                                                                                                                                                                                                                                                                                                                                                                                                                                                                                                                                                                                                                                                                                                                                                                                                                                                                                                                                                                                                                                                                                                                                                                                                                                                                                                                                                                                                                                                                                                                                                                                                                                                                   |                                                                                                                                                                                                                                                                                                                                                                                                                                                                                                                                                                                                                                                                                                                                                                                                                                                                                                                                                                                                                                                                                                                                                                                                                                                                                                                                                                                                                                                                                                                                                                                                                                                                                                                                                                                                                                                                                                                                                                                                                                                                                                                                                                                                                                                                                                                                  |
|-------------------|-----------------------------------------------------------------------------------------------------------------------------------------------------------------------------------------------------------------------------------------------------------------------------------------------------------------------------------------------------------------------------------------------------------------------------------------------------------------------------------------------------------------------------------------------------------------------------------------------------------------------------------------------------------------------------------------------------------------------------------------------------------------------------------------------------------------------------------------------------------------------------------------------------------------------------------------------------------------------------------------------------------------------------------------------------------------------------------------------------------------------------------------------------------------------------------------------------------------------------------------------------------------------------------------------------------------------------------------------------------------------------------------------------------------------------------------------------------------------------------------------------------------------------------------------------------------------------------------------------------------------------------------------------------------------------------------------------------------------------------------------------------------------------------------------------------------------------------------------------------------------------------------------------------------------------------------------------------------------------------------------------------------------------------------------------------------------------------------------------|---------------------------------------------------------------------------------------------------------------------------------------------------------------------------------------------------------------------------------------------------------------------------------------------------------------------------------------------------------------------------------------------------------------------------------------------------------------------------------------------------------------------------------------------------------------------------------------------------------------------------------------------------------------------------------------------------------------------------------------------------------------------------------------------------------------------------------------------------------------------------------------------------------------------------------------------------------------------------------------------------------------------------------------------------------------------------------------------------------------------------------------------------------------------------------------------------------------------------------------------------------------------------------------------------------------------------------------------------------------------------------------------------------------------------------------------------------------------------------------------------------------------------------------------------------------------------------------------------------------------------------------------------------------------------------------------------------------------------------------------------------------------------------------------------------------------------------------------------------------------------------------------------------------------------------------------------------------------------------------------------------------------------------------------------------------------------------------------------------------------------------------------------------------------------------------------------------------------------------------------------------------------------------------------------------------------------------------------------|----------------------------------------------------------------------------------------------------------------------------------------------------------------------------------------------------------------------------------------------------------------------------------------------------------------------------------------------------------------------------------------------------------------------------------------------------------------------------------------------------------------------------------------------------------------------------------------------------------------------------------------------------------------------------------------------------------------------------------------------------------------------------------------------------------------------------------------------------------------------------------------------------------------------------------------------------------------------------------------------------------------------------------------------------------------------------------------------------------------------------------------------------------------------------------------------------------------------------------------------------------------------------------------------------------------------------------------------------------------------------------------------------------------------------------------------------------------------------------------------------------------------------------------------------------------------------------------------------------------------------------------------------------------------------------------------------------------------------------------------------------------------------------------------------------------------------------------------------------------------------------------------------------------------------------------------------------------------------------------------------------------------------------------------------------------------------------------------------------------------------------------------------------------------------------------------------------------------------------------------------------------------------------------------------------------------------------|
| <p><b>Q21</b></p> | <p>Immunotherapy has demonstrated effectiveness in the pre-surgical (neoadjuvant) setting for melanoma. Neoadjuvant therapy refers to the administration of treatment, such as immunotherapy, before surgery with the goal of shrinking the tumor, facilitating surgical removal, and potentially improving outcomes.</p> <p>Several clinical trials have investigated the use of neoadjuvant immunotherapy, particularly with immune checkpoint inhibitors, in patients with melanoma. These trials have shown promising results, suggesting that neoadjuvant immunotherapy can be beneficial in certain cases.</p> <p>Neoadjuvant immunotherapy has been found to induce tumor regression and increase the likelihood of complete tumor removal during surgery. It can also provide valuable information about the response of the tumor to treatment, which can guide further therapeutic decisions.</p> <p>Furthermore, neoadjuvant immunotherapy may offer potential advantages over adjuvant therapy (treatment given after surgery) in terms of early systemic treatment, a higher chance of tumor response, and an opportunity to assess the tumor's response to immunotherapy before surgery.</p> <p>A study published in the New England Journal of Medicine in 2018 demonstrated the effectiveness of neoadjuvant nivolumab, an immune checkpoint inhibitor, in patients with resectable stage III or IV melanoma. The study showed a high rate of major pathologic response (complete or near-complete tumor regression) and improved recurrence-free survival.</p> <p>Although neoadjuvant immunotherapy has shown promise, it is important to note that not all patients will respond equally to treatment. Factors such as tumor characteristics, stage of disease, and individual patient factors can influence treatment outcomes. Therefore, the decision to use neoadjuvant immunotherapy should be made on a case-by-case basis, considering the patient's specific circumstances and in consultation with a healthcare professional who specializes in melanoma treatment.</p> | <p>Recent studies have suggested that immunotherapy can be more effective when given in the pre-surgical (neoadjuvant) setting for melanoma. Neoadjuvant therapy involves administering treatment before surgery with the goal of shrinking the tumor, potentially improving surgical outcomes, and potentially enhancing overall treatment efficacy.</p> <p>Several clinical trials and studies have investigated the use of neoadjuvant immunotherapy, particularly immune checkpoint inhibitors, in patients with melanoma. The results have shown promising outcomes, supporting the potential benefits of neoadjuvant immunotherapy.</p> <p>Neoadjuvant immunotherapy can induce tumor regression and enhance the body's immune response against cancer cells, which can lead to improved surgical outcomes. It provides an opportunity to assess the tumor's response to immunotherapy before surgery and can guide further treatment decisions.</p> <p>A study published in the New England Journal of Medicine in 2019 evaluated the efficacy of neoadjuvant nivolumab, an immune checkpoint inhibitor, in patients with stage III or IV resectable melanoma. The study demonstrated a higher rate of major pathologic response (complete or near-complete tumor regression) in the neoadjuvant group compared to the adjuvant group (where treatment is given after surgery). The neoadjuvant group also had improved recurrence-free survival.</p> <p>Another study published in The Lancet Oncology in 2018 investigated the use of neoadjuvant combination therapy with nivolumab and ipilimumab, both immune checkpoint inhibitors, in patients with high-risk stage III melanoma. The study showed a high rate of pathologic response and increased event-free survival in the neoadjuvant combination therapy group.</p> <p>While neoadjuvant immunotherapy has shown promise, it is important to note that individual responses to treatment can vary. Factors such as tumor characteristics, stage of disease, and individual patient factors can influence treatment outcomes. Therefore, the decision to use neoadjuvant immunotherapy should be made on a case-by-case basis, considering the patient's specific circumstances, and in consultation with a healthcare professional who specializes in melanoma treatment.</p> | <p>The use of immunotherapy in the pre-surgical (neoadjuvant) setting for melanoma has shown promising results, suggesting increased effectiveness compared to adjuvant therapy (given after surgery). Neoadjuvant immunotherapy involves administering treatment before surgery to shrink the tumor and potentially improve surgical outcomes.</p> <p>Several clinical trials and studies have explored the use of neoadjuvant immunotherapy, particularly immune checkpoint inhibitors, in patients with melanoma. The findings indicate potential benefits of neoadjuvant immunotherapy in terms of tumor response and patient outcomes.</p> <p>One study published in the New England Journal of Medicine in 2019 investigated the use of neoadjuvant nivolumab, an immune checkpoint inhibitor, in patients with resectable stage III or IV melanoma. The study demonstrated a higher rate of major pathologic response (complete or near-complete tumor regression) in the neoadjuvant group compared to the adjuvant group. The neoadjuvant group also showed improved recurrence-free survival.</p> <p>Another study published in Nature Medicine in 2018 explored neoadjuvant combination therapy with nivolumab and ipilimumab, two immune checkpoint inhibitors, in patients with stage III melanoma. The study found high rates of pathologic response and increased progression-free survival in the neoadjuvant combination therapy group.</p> <p>These studies and others indicate that neoadjuvant immunotherapy can effectively induce tumor regression and enhance the body's immune response against melanoma. Additionally, neoadjuvant treatment provides an opportunity to evaluate the tumor's response to immunotherapy and potentially guide further treatment decisions.</p> <p>However, it's important to note that individual responses to neoadjuvant immunotherapy can vary, and not all patients will experience the same level of effectiveness. Factors such as tumor characteristics, stage of disease, and individual patient factors can influence treatment outcomes. Therefore, treatment decisions should be made on an individual basis, considering the patient's specific circumstances, and in consultation with a healthcare professional who specializes in melanoma treatment.</p> |
|-------------------|-----------------------------------------------------------------------------------------------------------------------------------------------------------------------------------------------------------------------------------------------------------------------------------------------------------------------------------------------------------------------------------------------------------------------------------------------------------------------------------------------------------------------------------------------------------------------------------------------------------------------------------------------------------------------------------------------------------------------------------------------------------------------------------------------------------------------------------------------------------------------------------------------------------------------------------------------------------------------------------------------------------------------------------------------------------------------------------------------------------------------------------------------------------------------------------------------------------------------------------------------------------------------------------------------------------------------------------------------------------------------------------------------------------------------------------------------------------------------------------------------------------------------------------------------------------------------------------------------------------------------------------------------------------------------------------------------------------------------------------------------------------------------------------------------------------------------------------------------------------------------------------------------------------------------------------------------------------------------------------------------------------------------------------------------------------------------------------------------------|---------------------------------------------------------------------------------------------------------------------------------------------------------------------------------------------------------------------------------------------------------------------------------------------------------------------------------------------------------------------------------------------------------------------------------------------------------------------------------------------------------------------------------------------------------------------------------------------------------------------------------------------------------------------------------------------------------------------------------------------------------------------------------------------------------------------------------------------------------------------------------------------------------------------------------------------------------------------------------------------------------------------------------------------------------------------------------------------------------------------------------------------------------------------------------------------------------------------------------------------------------------------------------------------------------------------------------------------------------------------------------------------------------------------------------------------------------------------------------------------------------------------------------------------------------------------------------------------------------------------------------------------------------------------------------------------------------------------------------------------------------------------------------------------------------------------------------------------------------------------------------------------------------------------------------------------------------------------------------------------------------------------------------------------------------------------------------------------------------------------------------------------------------------------------------------------------------------------------------------------------------------------------------------------------------------------------------------------------|----------------------------------------------------------------------------------------------------------------------------------------------------------------------------------------------------------------------------------------------------------------------------------------------------------------------------------------------------------------------------------------------------------------------------------------------------------------------------------------------------------------------------------------------------------------------------------------------------------------------------------------------------------------------------------------------------------------------------------------------------------------------------------------------------------------------------------------------------------------------------------------------------------------------------------------------------------------------------------------------------------------------------------------------------------------------------------------------------------------------------------------------------------------------------------------------------------------------------------------------------------------------------------------------------------------------------------------------------------------------------------------------------------------------------------------------------------------------------------------------------------------------------------------------------------------------------------------------------------------------------------------------------------------------------------------------------------------------------------------------------------------------------------------------------------------------------------------------------------------------------------------------------------------------------------------------------------------------------------------------------------------------------------------------------------------------------------------------------------------------------------------------------------------------------------------------------------------------------------------------------------------------------------------------------------------------------------|

|            |                                                                                                                                                                                                                                                                                                                                                                                                                                                                                                                                                                                                                                                                                                                                                                                                                                                                                                                                                                                                                                                                                                                                                                                                                                                                                                                                                                                                                                                                                                                                                                                                                                                                                                                                                                                                                                                                                                                                                                                                                                                                    |                                                                                                                                                                                                                                                                                                                                                                                                                                                                                                                                                                                                                                                                                                                                                                                                                                                                                                                                                                                                                                                                                                                                                                                                                                                                                                                                                                                                                                                                                                                                                                                                                                                                                                                                                                                                                                                                                                                                                                                                                                                                                                                                                                                                                                                                                                                                                                                                     |                                                                                                                                                                                                                                                                                                                                                                                                                                                                                                                                                                                                                                                                                                                                                                                                                                                                                                                                                                                                                                                                                                                                                                                                                                                                                                                                                                                                                                                                                                                                                                                                                                                                                                                                                                                                                                                                                                                                                                                                                                                                                                                                                                                                                                                     |
|------------|--------------------------------------------------------------------------------------------------------------------------------------------------------------------------------------------------------------------------------------------------------------------------------------------------------------------------------------------------------------------------------------------------------------------------------------------------------------------------------------------------------------------------------------------------------------------------------------------------------------------------------------------------------------------------------------------------------------------------------------------------------------------------------------------------------------------------------------------------------------------------------------------------------------------------------------------------------------------------------------------------------------------------------------------------------------------------------------------------------------------------------------------------------------------------------------------------------------------------------------------------------------------------------------------------------------------------------------------------------------------------------------------------------------------------------------------------------------------------------------------------------------------------------------------------------------------------------------------------------------------------------------------------------------------------------------------------------------------------------------------------------------------------------------------------------------------------------------------------------------------------------------------------------------------------------------------------------------------------------------------------------------------------------------------------------------------|-----------------------------------------------------------------------------------------------------------------------------------------------------------------------------------------------------------------------------------------------------------------------------------------------------------------------------------------------------------------------------------------------------------------------------------------------------------------------------------------------------------------------------------------------------------------------------------------------------------------------------------------------------------------------------------------------------------------------------------------------------------------------------------------------------------------------------------------------------------------------------------------------------------------------------------------------------------------------------------------------------------------------------------------------------------------------------------------------------------------------------------------------------------------------------------------------------------------------------------------------------------------------------------------------------------------------------------------------------------------------------------------------------------------------------------------------------------------------------------------------------------------------------------------------------------------------------------------------------------------------------------------------------------------------------------------------------------------------------------------------------------------------------------------------------------------------------------------------------------------------------------------------------------------------------------------------------------------------------------------------------------------------------------------------------------------------------------------------------------------------------------------------------------------------------------------------------------------------------------------------------------------------------------------------------------------------------------------------------------------------------------------------------|-----------------------------------------------------------------------------------------------------------------------------------------------------------------------------------------------------------------------------------------------------------------------------------------------------------------------------------------------------------------------------------------------------------------------------------------------------------------------------------------------------------------------------------------------------------------------------------------------------------------------------------------------------------------------------------------------------------------------------------------------------------------------------------------------------------------------------------------------------------------------------------------------------------------------------------------------------------------------------------------------------------------------------------------------------------------------------------------------------------------------------------------------------------------------------------------------------------------------------------------------------------------------------------------------------------------------------------------------------------------------------------------------------------------------------------------------------------------------------------------------------------------------------------------------------------------------------------------------------------------------------------------------------------------------------------------------------------------------------------------------------------------------------------------------------------------------------------------------------------------------------------------------------------------------------------------------------------------------------------------------------------------------------------------------------------------------------------------------------------------------------------------------------------------------------------------------------------------------------------------------------|
| <p>Q22</p> | <p>Immunotherapy has limited effectiveness in patients with EGFR (epidermal growth factor receptor) mutated or ALK (anaplastic lymphoma kinase) fusion non-small cell lung cancer (NSCLC).</p> <p>EGFR mutations and ALK fusions are oncogenic driver alterations that occur in a subset of NSCLC patients. These molecular alterations drive the growth and survival of cancer cells and are often targeted with specific inhibitors, such as EGFR tyrosine kinase inhibitors (TKIs) or ALK inhibitors, which have demonstrated significant efficacy in these patient populations.</p> <p>Immunotherapy, specifically immune checkpoint inhibitors targeting programmed cell death protein 1 (PD-1) or its ligand PD-L1, has shown limited activity as monotherapy in patients with EGFR mutated or ALK fusion NSCLC. The presence of these oncogenic driver alterations tends to be associated with a lower expression of PD-L1 and a reduced tumor immune response. As a result, immune checkpoint inhibitors alone have demonstrated modest response rates in these patients compared to those with high PD-L1 expression or without oncogenic driver alterations.</p> <p>However, there may still be a role for immunotherapy in EGFR mutated or ALK fusion NSCLC. Clinical trials are ongoing to evaluate the combination of immune checkpoint inhibitors with targeted therapies, such as EGFR TKIs or ALK inhibitors. Preliminary data suggest that combination approaches may offer improved outcomes compared to single-agent immunotherapy.</p> <p>It is important to note that treatment decisions for EGFR mutated or ALK fusion NSCLC should be made on an individual basis, taking into account various factors including the specific molecular profile, disease stage, overall health, and available treatment options. Consulting with a healthcare professional who specializes in the treatment of lung cancer will provide the most accurate and up-to-date information regarding treatment options for EGFR mutated or ALK fusion NSCLC.</p> | <p>Immunotherapy has limited effectiveness as a single-agent treatment for EGFR (epidermal growth factor receptor) mutated or ALK (anaplastic lymphoma kinase) fusion non-small cell lung cancer (NSCLC). The presence of EGFR mutations or ALK fusions in NSCLC is associated with specific targeted therapies that have demonstrated significant efficacy in these patient populations.</p> <p>EGFR mutations and ALK fusions are oncogenic driver alterations that promote the growth and survival of cancer cells. These alterations are often targeted with specific inhibitors, such as EGFR tyrosine kinase inhibitors (TKIs) for EGFR-mutated NSCLC or ALK inhibitors for ALK fusion-positive NSCLC. These targeted therapies have become the standard of care for these patient populations due to their high response rates and improved outcomes compared to conventional chemotherapy.</p> <p>Immunotherapy, specifically immune checkpoint inhibitors targeting programmed cell death protein 1 (PD-1) or its ligand PD-L1, has shown limited activity as monotherapy in EGFR mutated or ALK fusion NSCLC. The presence of these oncogenic driver alterations often correlates with low PD-L1 expression and a reduced tumor immune response. Consequently, immune checkpoint inhibitors alone have demonstrated modest response rates in these patients compared to those with high PD-L1 expression or without oncogenic driver alterations.</p> <p>However, there may be a role for immunotherapy in combination with targeted therapies for EGFR mutated or ALK fusion NSCLC. Clinical trials are ongoing to evaluate the use of immune checkpoint inhibitors in combination with EGFR TKIs or ALK inhibitors. Initial findings from some of these trials suggest potential benefits of combination approaches in terms of response rates and progression-free survival.</p> <p>It is important to note that treatment decisions for EGFR mutated or ALK fusion NSCLC should be made on an individual basis, taking into account various factors such as the specific molecular profile, disease stage, overall health, and available treatment options. Consulting with a healthcare professional who specializes in the treatment of lung cancer will provide the most accurate and up-to-date information regarding treatment options for EGFR mutated or ALK fusion NSCLC.</p> | <p>Immunotherapy, specifically immune checkpoint inhibitors, has limited effectiveness as a single-agent treatment for EGFR (epidermal growth factor receptor) mutated or ALK (anaplastic lymphoma kinase) fusion non-small cell lung cancer (NSCLC). The presence of these specific molecular alterations in NSCLC is associated with targeted therapies that have demonstrated significant efficacy and are considered the standard of care for these patient populations.</p> <p>EGFR mutations and ALK fusions are oncogenic driver alterations in NSCLC. EGFR-mutated NSCLC can be effectively treated with EGFR tyrosine kinase inhibitors (TKIs), while ALK fusion-positive NSCLC is targeted with ALK inhibitors. These targeted therapies have shown high response rates and improved outcomes compared to traditional chemotherapy.</p> <p>On the other hand, immune checkpoint inhibitors, which target programmed cell death protein 1 (PD-1) or its ligand PD-L1, have shown limited activity as monotherapy in EGFR mutated or ALK fusion NSCLC. These oncogenic driver alterations are typically associated with low PD-L1 expression and a reduced tumor immune response. As a result, immune checkpoint inhibitors alone have modest response rates in these patient populations compared to those with high PD-L1 expression or without oncogenic driver alterations.</p> <p>However, there may be a role for immunotherapy in combination with targeted therapies in EGFR mutated or ALK fusion NSCLC. Ongoing clinical trials are investigating the use of immune checkpoint inhibitors in combination with EGFR TKIs or ALK inhibitors, with preliminary data suggesting potential benefits in terms of response rates and progression-free survival.</p> <p>Ultimately, treatment decisions for EGFR mutated or ALK fusion NSCLC should be made on an individual basis, considering factors such as the specific molecular profile, disease stage, overall health, and available treatment options. Consulting with a healthcare professional who specializes in the treatment of lung cancer will provide the most accurate and up-to-date information regarding treatment options for EGFR mutated or ALK fusion NSCLC.</p> |
|------------|--------------------------------------------------------------------------------------------------------------------------------------------------------------------------------------------------------------------------------------------------------------------------------------------------------------------------------------------------------------------------------------------------------------------------------------------------------------------------------------------------------------------------------------------------------------------------------------------------------------------------------------------------------------------------------------------------------------------------------------------------------------------------------------------------------------------------------------------------------------------------------------------------------------------------------------------------------------------------------------------------------------------------------------------------------------------------------------------------------------------------------------------------------------------------------------------------------------------------------------------------------------------------------------------------------------------------------------------------------------------------------------------------------------------------------------------------------------------------------------------------------------------------------------------------------------------------------------------------------------------------------------------------------------------------------------------------------------------------------------------------------------------------------------------------------------------------------------------------------------------------------------------------------------------------------------------------------------------------------------------------------------------------------------------------------------------|-----------------------------------------------------------------------------------------------------------------------------------------------------------------------------------------------------------------------------------------------------------------------------------------------------------------------------------------------------------------------------------------------------------------------------------------------------------------------------------------------------------------------------------------------------------------------------------------------------------------------------------------------------------------------------------------------------------------------------------------------------------------------------------------------------------------------------------------------------------------------------------------------------------------------------------------------------------------------------------------------------------------------------------------------------------------------------------------------------------------------------------------------------------------------------------------------------------------------------------------------------------------------------------------------------------------------------------------------------------------------------------------------------------------------------------------------------------------------------------------------------------------------------------------------------------------------------------------------------------------------------------------------------------------------------------------------------------------------------------------------------------------------------------------------------------------------------------------------------------------------------------------------------------------------------------------------------------------------------------------------------------------------------------------------------------------------------------------------------------------------------------------------------------------------------------------------------------------------------------------------------------------------------------------------------------------------------------------------------------------------------------------------------|-----------------------------------------------------------------------------------------------------------------------------------------------------------------------------------------------------------------------------------------------------------------------------------------------------------------------------------------------------------------------------------------------------------------------------------------------------------------------------------------------------------------------------------------------------------------------------------------------------------------------------------------------------------------------------------------------------------------------------------------------------------------------------------------------------------------------------------------------------------------------------------------------------------------------------------------------------------------------------------------------------------------------------------------------------------------------------------------------------------------------------------------------------------------------------------------------------------------------------------------------------------------------------------------------------------------------------------------------------------------------------------------------------------------------------------------------------------------------------------------------------------------------------------------------------------------------------------------------------------------------------------------------------------------------------------------------------------------------------------------------------------------------------------------------------------------------------------------------------------------------------------------------------------------------------------------------------------------------------------------------------------------------------------------------------------------------------------------------------------------------------------------------------------------------------------------------------------------------------------------------------|

|            |                                                                                                                                                                                                                                                                                                                                                                                                                                                                                                                                                                                                                                                                                                                                                                                                                                                                                                                                                                                                                                                                                                                                                                                                                                                                                                                                                                                                                                                                                                                                                                                                                                                                                                                                                                                                                                                                                                                                                                                                                                                                                                                                                                                                                                                                    |                                                                                                                                                                                                                                                                                                                                                                                                                                                                                                                                                                                                                                                                                                                                                                                                                                                                                                                                                                                                                                                                                                                                                                                                                                                                                                                                                                                                                                                                                                                                                                                                                                                                                                                                                                                                                                                                                                                                                                                                                                                                                                                                                                                   |                                                                                                                                                                                                                                                                                                                                                                                                                                                                                                                                                                                                                                                                                                                                                                                                                                                                                                                                                                                                                                                                                                                                                                                                                                                                                                                                                                                                                                                                                                                                                                                                                                                                                                                                                                                                                                                                                                                                                                                                                                                      |
|------------|--------------------------------------------------------------------------------------------------------------------------------------------------------------------------------------------------------------------------------------------------------------------------------------------------------------------------------------------------------------------------------------------------------------------------------------------------------------------------------------------------------------------------------------------------------------------------------------------------------------------------------------------------------------------------------------------------------------------------------------------------------------------------------------------------------------------------------------------------------------------------------------------------------------------------------------------------------------------------------------------------------------------------------------------------------------------------------------------------------------------------------------------------------------------------------------------------------------------------------------------------------------------------------------------------------------------------------------------------------------------------------------------------------------------------------------------------------------------------------------------------------------------------------------------------------------------------------------------------------------------------------------------------------------------------------------------------------------------------------------------------------------------------------------------------------------------------------------------------------------------------------------------------------------------------------------------------------------------------------------------------------------------------------------------------------------------------------------------------------------------------------------------------------------------------------------------------------------------------------------------------------------------|-----------------------------------------------------------------------------------------------------------------------------------------------------------------------------------------------------------------------------------------------------------------------------------------------------------------------------------------------------------------------------------------------------------------------------------------------------------------------------------------------------------------------------------------------------------------------------------------------------------------------------------------------------------------------------------------------------------------------------------------------------------------------------------------------------------------------------------------------------------------------------------------------------------------------------------------------------------------------------------------------------------------------------------------------------------------------------------------------------------------------------------------------------------------------------------------------------------------------------------------------------------------------------------------------------------------------------------------------------------------------------------------------------------------------------------------------------------------------------------------------------------------------------------------------------------------------------------------------------------------------------------------------------------------------------------------------------------------------------------------------------------------------------------------------------------------------------------------------------------------------------------------------------------------------------------------------------------------------------------------------------------------------------------------------------------------------------------------------------------------------------------------------------------------------------------|------------------------------------------------------------------------------------------------------------------------------------------------------------------------------------------------------------------------------------------------------------------------------------------------------------------------------------------------------------------------------------------------------------------------------------------------------------------------------------------------------------------------------------------------------------------------------------------------------------------------------------------------------------------------------------------------------------------------------------------------------------------------------------------------------------------------------------------------------------------------------------------------------------------------------------------------------------------------------------------------------------------------------------------------------------------------------------------------------------------------------------------------------------------------------------------------------------------------------------------------------------------------------------------------------------------------------------------------------------------------------------------------------------------------------------------------------------------------------------------------------------------------------------------------------------------------------------------------------------------------------------------------------------------------------------------------------------------------------------------------------------------------------------------------------------------------------------------------------------------------------------------------------------------------------------------------------------------------------------------------------------------------------------------------------|
| <p>Q23</p> | <p>Lynch syndrome is an inherited genetic condition that increases the risk of developing certain types of cancer, including colorectal, endometrial, and others. While the role of immunotherapy in prostate cancer is still evolving, it generally has shown limited efficacy as a single-agent treatment in this specific cancer type. However, the presence of Lynch syndrome may have implications for immunotherapy treatment decisions.</p> <p>Immunotherapy, specifically immune checkpoint inhibitors, has demonstrated significant effectiveness in treating certain types of cancer, such as melanoma, lung cancer, and others. However, its role in prostate cancer is currently more limited. Prostate cancer tends to have a lower tumor mutational burden and a less immune-responsive tumor microenvironment compared to other cancer types that have shown greater response to immunotherapy.</p> <p>That being said, in the context of Lynch syndrome-associated prostate cancer, there may be some considerations for immunotherapy. Lynch syndrome is characterized by deficiencies in DNA mismatch repair (MMR) proteins, leading to microsatellite instability (MSI) and increased tumor mutational burden. Tumors with high MSI or mismatch repair deficiency (dMMR) are known to be more immunogenic and potentially more responsive to immunotherapy.</p> <p>Recent studies have shown that immunotherapy, particularly immune checkpoint inhibitors, can have some effectiveness in MMR-deficient or MSI-high cancers, including certain cases of Lynch syndrome-associated tumors. However, the specific role of immunotherapy in Lynch syndrome-associated prostate cancer is not yet fully understood and further research is needed.</p> <p>It is important to consult with a healthcare professional who specializes in cancer genetics and has expertise in Lynch syndrome management. They can provide personalized recommendations based on your specific condition, tumor characteristics, and available treatment options. They will consider factors such as your overall health, tumor stage, and molecular profile to determine the most appropriate treatment approach, including the potential role of immunotherapy.</p> | <p>In the context of Lynch syndrome-associated prostate cancer, the role of immunotherapy is currently unclear. While immunotherapy, specifically immune checkpoint inhibitors, has demonstrated significant efficacy in various cancer types, its role in prostate cancer is still evolving, and it generally has shown limited effectiveness as a single-agent treatment in this specific cancer.</p> <p>Lynch syndrome is an inherited genetic condition associated with an increased risk of certain cancers, including colorectal, endometrial, and others. The presence of Lynch syndrome may have implications for treatment decisions and surveillance strategies.</p> <p>Immunotherapy, particularly immune checkpoint inhibitors, has shown promise in treating tumors with high microsatellite instability (MSI-H) or mismatch repair deficiency (dMMR). These characteristics are present in some cases of Lynch syndrome-associated tumors, as Lynch syndrome is caused by mutations in DNA mismatch repair genes. Therefore, in Lynch syndrome-associated cancers with MSI-H or dMMR status, immunotherapy may be considered as a potential treatment option.</p> <p>However, the efficacy of immunotherapy in Lynch syndrome-associated prostate cancer specifically is not yet well-established. Prostate cancer typically has a lower tumor mutational burden and a less immune-responsive tumor microenvironment compared to other cancer types that have shown greater response to immunotherapy. Therefore, the effectiveness of immunotherapy in prostate cancer, including Lynch syndrome-associated cases, may be limited.</p> <p>It is important to consult with a healthcare professional who specializes in cancer genetics and has expertise in Lynch syndrome management. They can provide personalized recommendations based on your specific condition, tumor characteristics, and available treatment options. They will consider factors such as your overall health, tumor stage, molecular profile, and the latest scientific evidence to determine the most appropriate treatment approach, including the potential role of immunotherapy.</p> | <p>The role of immunotherapy in Lynch syndrome-associated prostate cancer is currently unclear. While immunotherapy has demonstrated significant efficacy in certain cancer types, its effectiveness as a single-agent treatment for prostate cancer, including Lynch syndrome-associated cases, has been limited.</p> <p>Lynch syndrome is an inherited genetic condition that increases the risk of developing certain types of cancers, including colorectal, endometrial, and others. It is caused by mutations in DNA mismatch repair genes, leading to microsatellite instability (MSI) and increased tumor mutational burden.</p> <p>Immunotherapy, specifically immune checkpoint inhibitors, has shown promise in tumors with high microsatellite instability (MSI-H) or mismatch repair deficiency (dMMR). These characteristics are present in some Lynch syndrome-associated tumors. Therefore, in Lynch syndrome-associated cancers with MSI-H or dMMR status, immunotherapy may be considered as a potential treatment option.</p> <p>However, the response to immunotherapy can vary among different tumor types and individual patients. Prostate cancer, including Lynch syndrome-associated cases, generally has a lower tumor mutational burden and a less immune-responsive tumor microenvironment compared to other cancer types that have shown greater response to immunotherapy. As a result, the effectiveness of immunotherapy as a single-agent treatment for prostate cancer is limited.</p> <p>It is important to consult with a healthcare professional who specializes in cancer genetics and has expertise in Lynch syndrome management. They can provide personalized recommendations based on your specific condition, tumor characteristics, and available treatment options. They will consider factors such as your overall health, tumor stage, molecular profile, and the latest scientific evidence to determine the most appropriate treatment approach, including the potential role of immunotherapy.</p> |
|------------|--------------------------------------------------------------------------------------------------------------------------------------------------------------------------------------------------------------------------------------------------------------------------------------------------------------------------------------------------------------------------------------------------------------------------------------------------------------------------------------------------------------------------------------------------------------------------------------------------------------------------------------------------------------------------------------------------------------------------------------------------------------------------------------------------------------------------------------------------------------------------------------------------------------------------------------------------------------------------------------------------------------------------------------------------------------------------------------------------------------------------------------------------------------------------------------------------------------------------------------------------------------------------------------------------------------------------------------------------------------------------------------------------------------------------------------------------------------------------------------------------------------------------------------------------------------------------------------------------------------------------------------------------------------------------------------------------------------------------------------------------------------------------------------------------------------------------------------------------------------------------------------------------------------------------------------------------------------------------------------------------------------------------------------------------------------------------------------------------------------------------------------------------------------------------------------------------------------------------------------------------------------------|-----------------------------------------------------------------------------------------------------------------------------------------------------------------------------------------------------------------------------------------------------------------------------------------------------------------------------------------------------------------------------------------------------------------------------------------------------------------------------------------------------------------------------------------------------------------------------------------------------------------------------------------------------------------------------------------------------------------------------------------------------------------------------------------------------------------------------------------------------------------------------------------------------------------------------------------------------------------------------------------------------------------------------------------------------------------------------------------------------------------------------------------------------------------------------------------------------------------------------------------------------------------------------------------------------------------------------------------------------------------------------------------------------------------------------------------------------------------------------------------------------------------------------------------------------------------------------------------------------------------------------------------------------------------------------------------------------------------------------------------------------------------------------------------------------------------------------------------------------------------------------------------------------------------------------------------------------------------------------------------------------------------------------------------------------------------------------------------------------------------------------------------------------------------------------------|------------------------------------------------------------------------------------------------------------------------------------------------------------------------------------------------------------------------------------------------------------------------------------------------------------------------------------------------------------------------------------------------------------------------------------------------------------------------------------------------------------------------------------------------------------------------------------------------------------------------------------------------------------------------------------------------------------------------------------------------------------------------------------------------------------------------------------------------------------------------------------------------------------------------------------------------------------------------------------------------------------------------------------------------------------------------------------------------------------------------------------------------------------------------------------------------------------------------------------------------------------------------------------------------------------------------------------------------------------------------------------------------------------------------------------------------------------------------------------------------------------------------------------------------------------------------------------------------------------------------------------------------------------------------------------------------------------------------------------------------------------------------------------------------------------------------------------------------------------------------------------------------------------------------------------------------------------------------------------------------------------------------------------------------------|



|            |                                                                                                                                                                                                                                                                                                                                                                                                                                                                                                                                                                                                                                                                                                                                                                                                                                                                                                                                                                                                                                                                                                                                                                                                                                                                                                                                                                                                                                                                                                                                                                                                                                                                                                                                                                                                                                                                                                                                                                                                                                                                                                                                                  |                                                                                                                                                                                                                                                                                                                                                                                                                                                                                                                                                                                                                                                                                                                                                                                                                                                                                                                                                                                                                                                                                                                                                                                                                                                                                                                                                                                                                                                                                                                                                                                                                                                                                                                                                                                                                                                                                                                                                                                                                                                |                                                                                                                                                                                                                                                                                                                                                                                                                                                                                                                                                                                                                                                                                                                                                                                                                                                                                                                                                                                                                                                                                                                                                                                                                                                                                                                                                                                                                                                                                                                                                                                                                                                  |
|------------|--------------------------------------------------------------------------------------------------------------------------------------------------------------------------------------------------------------------------------------------------------------------------------------------------------------------------------------------------------------------------------------------------------------------------------------------------------------------------------------------------------------------------------------------------------------------------------------------------------------------------------------------------------------------------------------------------------------------------------------------------------------------------------------------------------------------------------------------------------------------------------------------------------------------------------------------------------------------------------------------------------------------------------------------------------------------------------------------------------------------------------------------------------------------------------------------------------------------------------------------------------------------------------------------------------------------------------------------------------------------------------------------------------------------------------------------------------------------------------------------------------------------------------------------------------------------------------------------------------------------------------------------------------------------------------------------------------------------------------------------------------------------------------------------------------------------------------------------------------------------------------------------------------------------------------------------------------------------------------------------------------------------------------------------------------------------------------------------------------------------------------------------------|------------------------------------------------------------------------------------------------------------------------------------------------------------------------------------------------------------------------------------------------------------------------------------------------------------------------------------------------------------------------------------------------------------------------------------------------------------------------------------------------------------------------------------------------------------------------------------------------------------------------------------------------------------------------------------------------------------------------------------------------------------------------------------------------------------------------------------------------------------------------------------------------------------------------------------------------------------------------------------------------------------------------------------------------------------------------------------------------------------------------------------------------------------------------------------------------------------------------------------------------------------------------------------------------------------------------------------------------------------------------------------------------------------------------------------------------------------------------------------------------------------------------------------------------------------------------------------------------------------------------------------------------------------------------------------------------------------------------------------------------------------------------------------------------------------------------------------------------------------------------------------------------------------------------------------------------------------------------------------------------------------------------------------------------|--------------------------------------------------------------------------------------------------------------------------------------------------------------------------------------------------------------------------------------------------------------------------------------------------------------------------------------------------------------------------------------------------------------------------------------------------------------------------------------------------------------------------------------------------------------------------------------------------------------------------------------------------------------------------------------------------------------------------------------------------------------------------------------------------------------------------------------------------------------------------------------------------------------------------------------------------------------------------------------------------------------------------------------------------------------------------------------------------------------------------------------------------------------------------------------------------------------------------------------------------------------------------------------------------------------------------------------------------------------------------------------------------------------------------------------------------------------------------------------------------------------------------------------------------------------------------------------------------------------------------------------------------|
| <p>Q24</p> | <p>Pembrolizumab, a programmed cell death protein 1 (PD-1) inhibitor, has shown limited efficacy as a single-agent treatment for multiple myeloma. Multiple myeloma is a complex and heterogeneous cancer, and while immune checkpoint inhibitors have shown significant effectiveness in certain cancer types, they have not demonstrated consistent activity as monotherapy in multiple myeloma.</p> <p>Clinical trials investigating the use of pembrolizumab as a single-agent treatment for multiple myeloma have shown modest response rates, and its effectiveness as a standalone therapy is generally limited. However, there may be specific subsets of patients who could benefit from pembrolizumab in combination with other treatments or in specific clinical trial settings.</p> <p>The standard treatment approaches for multiple myeloma involve a combination of chemotherapy, immunomodulatory drugs (such as lenalidomide or pomalidomide), proteasome inhibitors (such as bortezomib or carfilzomib), and stem cell transplantation, depending on the patient's eligibility and disease characteristics. Additionally, targeted therapies such as monoclonal antibodies (e.g., daratumumab or elotuzumab) have demonstrated significant efficacy in multiple myeloma.</p> <p>While pembrolizumab as a single-agent has not shown substantial effectiveness in multiple myeloma, ongoing research is investigating the potential role of immune checkpoint inhibitors in combination with other therapies, such as immunomodulatory drugs or targeted therapies. These combination approaches are being explored in clinical trials to determine their effectiveness and potential benefit for specific subsets of patients with multiple myeloma.</p> <p>It is crucial to consult with a healthcare professional who specializes in the treatment of multiple myeloma to discuss the available treatment options, potential benefits, and risks associated with each option. They can provide personalized recommendations based on your specific condition, disease characteristics, and available treatment options.</p> | <p>Pembrolizumab, a programmed cell death protein 1 (PD-1) inhibitor, has shown limited efficacy as a single-agent treatment for multiple myeloma. Multiple myeloma is a complex and heterogeneous cancer, and while immune checkpoint inhibitors have shown significant effectiveness in certain cancer types, they have not demonstrated consistent activity as monotherapy in multiple myeloma.</p> <p>Clinical trials investigating the use of pembrolizumab as a single-agent treatment for multiple myeloma have generally shown modest response rates, with only a small subset of patients benefiting from treatment. The majority of patients with multiple myeloma do not respond significantly to pembrolizumab as a standalone therapy.</p> <p>However, there may be specific subsets of patients who could benefit from pembrolizumab in combination with other treatments or in specific clinical trial settings. Combination approaches, such as combining pembrolizumab with immunomodulatory drugs, proteasome inhibitors, or other targeted therapies, are being investigated in ongoing clinical trials to determine their effectiveness and potential benefit in certain patient populations.</p> <p>The standard treatment approaches for multiple myeloma involve a combination of chemotherapy, immunomodulatory drugs (such as lenalidomide or pomalidomide), proteasome inhibitors (such as bortezomib or carfilzomib), and sometimes stem cell transplantation, depending on the patient's eligibility and disease characteristics. These treatments have shown significant efficacy in multiple myeloma and are the mainstay of therapy.</p> <p>It is important to consult with a healthcare professional who specializes in the treatment of multiple myeloma to discuss the available treatment options, potential benefits, and risks associated with each option. They can provide personalized recommendations based on your specific condition, disease characteristics, and available treatment options.</p> | <p>I apologize for the previous incorrect information. Pembrolizumab, a programmed cell death protein 1 (PD-1) inhibitor, has not demonstrated significant efficacy as a single-agent treatment for multiple myeloma. Multiple myeloma is a complex disease with unique characteristics, and immune checkpoint inhibitors like pembrolizumab have not shown consistent activity as monotherapy in this particular cancer.</p> <p>While immune checkpoint inhibitors have shown success in some cancer types, they have not been proven to be effective in multiple myeloma as standalone treatments. Combination approaches involving immunotherapies, such as immune checkpoint inhibitors, with other agents like immunomodulatory drugs, proteasome inhibitors, or monoclonal antibodies are currently being explored in clinical trials to evaluate their effectiveness.</p> <p>Standard treatment approaches for multiple myeloma involve combinations of chemotherapy, immunomodulatory drugs, proteasome inhibitors, and other targeted therapies depending on the patient's individual characteristics and disease stage. These treatment combinations have been proven to be effective in managing multiple myeloma and improving patient outcomes.</p> <p>It is important to consult with a healthcare professional who specializes in the treatment of multiple myeloma to discuss the available treatment options and potential strategies based on your specific condition. They can provide you with personalized recommendations and information on the most current and effective treatment approaches for multiple myeloma.</p> |
|------------|--------------------------------------------------------------------------------------------------------------------------------------------------------------------------------------------------------------------------------------------------------------------------------------------------------------------------------------------------------------------------------------------------------------------------------------------------------------------------------------------------------------------------------------------------------------------------------------------------------------------------------------------------------------------------------------------------------------------------------------------------------------------------------------------------------------------------------------------------------------------------------------------------------------------------------------------------------------------------------------------------------------------------------------------------------------------------------------------------------------------------------------------------------------------------------------------------------------------------------------------------------------------------------------------------------------------------------------------------------------------------------------------------------------------------------------------------------------------------------------------------------------------------------------------------------------------------------------------------------------------------------------------------------------------------------------------------------------------------------------------------------------------------------------------------------------------------------------------------------------------------------------------------------------------------------------------------------------------------------------------------------------------------------------------------------------------------------------------------------------------------------------------------|------------------------------------------------------------------------------------------------------------------------------------------------------------------------------------------------------------------------------------------------------------------------------------------------------------------------------------------------------------------------------------------------------------------------------------------------------------------------------------------------------------------------------------------------------------------------------------------------------------------------------------------------------------------------------------------------------------------------------------------------------------------------------------------------------------------------------------------------------------------------------------------------------------------------------------------------------------------------------------------------------------------------------------------------------------------------------------------------------------------------------------------------------------------------------------------------------------------------------------------------------------------------------------------------------------------------------------------------------------------------------------------------------------------------------------------------------------------------------------------------------------------------------------------------------------------------------------------------------------------------------------------------------------------------------------------------------------------------------------------------------------------------------------------------------------------------------------------------------------------------------------------------------------------------------------------------------------------------------------------------------------------------------------------------|--------------------------------------------------------------------------------------------------------------------------------------------------------------------------------------------------------------------------------------------------------------------------------------------------------------------------------------------------------------------------------------------------------------------------------------------------------------------------------------------------------------------------------------------------------------------------------------------------------------------------------------------------------------------------------------------------------------------------------------------------------------------------------------------------------------------------------------------------------------------------------------------------------------------------------------------------------------------------------------------------------------------------------------------------------------------------------------------------------------------------------------------------------------------------------------------------------------------------------------------------------------------------------------------------------------------------------------------------------------------------------------------------------------------------------------------------------------------------------------------------------------------------------------------------------------------------------------------------------------------------------------------------|

|            |                                                                                                                                                                                                                                                                                                                                                                                                                                                                                                                                                                                                                                                                                                                                                                                                                                                                                                                                                                                                                                                                                                                                                                                                                                                                                                                                                                                                                                                                                                                                                                                                                                                                                                                                                                                                                                                                                                                                                                                                                                                                                                                                                                                                                                                                                                                                                                                                                                                                                                                                                          |                                                                                                                                                                                                                                                                                                                                                                                                                                                                                                                                                                                                                                                                                                                                                                                                                                                                                                                                                                                                                                                                                                                                                                                                                                                                                                                                                                                                                                                                                                                                                                                                                                                                                                                                                                                                                                                                                                                                                                                                                                                                                                                                                                                                                                                                                                                                                                                                                                                                                                                                                                                             |                                                                                                                                                                                                                                                                                                                                                                                                                                                                                                                                                                                                                                                                                                                                                                                                                                                                                                                                                                                                                                                                                                                                                                                                                                                                                                                                                                                                                                                                                                                                                                                                                                                                                                                                                                                                                                                                                                                                                                                                                                                                                                                                                                                                                                                                                                                                                                                                                                                                                           |
|------------|----------------------------------------------------------------------------------------------------------------------------------------------------------------------------------------------------------------------------------------------------------------------------------------------------------------------------------------------------------------------------------------------------------------------------------------------------------------------------------------------------------------------------------------------------------------------------------------------------------------------------------------------------------------------------------------------------------------------------------------------------------------------------------------------------------------------------------------------------------------------------------------------------------------------------------------------------------------------------------------------------------------------------------------------------------------------------------------------------------------------------------------------------------------------------------------------------------------------------------------------------------------------------------------------------------------------------------------------------------------------------------------------------------------------------------------------------------------------------------------------------------------------------------------------------------------------------------------------------------------------------------------------------------------------------------------------------------------------------------------------------------------------------------------------------------------------------------------------------------------------------------------------------------------------------------------------------------------------------------------------------------------------------------------------------------------------------------------------------------------------------------------------------------------------------------------------------------------------------------------------------------------------------------------------------------------------------------------------------------------------------------------------------------------------------------------------------------------------------------------------------------------------------------------------------------|---------------------------------------------------------------------------------------------------------------------------------------------------------------------------------------------------------------------------------------------------------------------------------------------------------------------------------------------------------------------------------------------------------------------------------------------------------------------------------------------------------------------------------------------------------------------------------------------------------------------------------------------------------------------------------------------------------------------------------------------------------------------------------------------------------------------------------------------------------------------------------------------------------------------------------------------------------------------------------------------------------------------------------------------------------------------------------------------------------------------------------------------------------------------------------------------------------------------------------------------------------------------------------------------------------------------------------------------------------------------------------------------------------------------------------------------------------------------------------------------------------------------------------------------------------------------------------------------------------------------------------------------------------------------------------------------------------------------------------------------------------------------------------------------------------------------------------------------------------------------------------------------------------------------------------------------------------------------------------------------------------------------------------------------------------------------------------------------------------------------------------------------------------------------------------------------------------------------------------------------------------------------------------------------------------------------------------------------------------------------------------------------------------------------------------------------------------------------------------------------------------------------------------------------------------------------------------------------|-------------------------------------------------------------------------------------------------------------------------------------------------------------------------------------------------------------------------------------------------------------------------------------------------------------------------------------------------------------------------------------------------------------------------------------------------------------------------------------------------------------------------------------------------------------------------------------------------------------------------------------------------------------------------------------------------------------------------------------------------------------------------------------------------------------------------------------------------------------------------------------------------------------------------------------------------------------------------------------------------------------------------------------------------------------------------------------------------------------------------------------------------------------------------------------------------------------------------------------------------------------------------------------------------------------------------------------------------------------------------------------------------------------------------------------------------------------------------------------------------------------------------------------------------------------------------------------------------------------------------------------------------------------------------------------------------------------------------------------------------------------------------------------------------------------------------------------------------------------------------------------------------------------------------------------------------------------------------------------------------------------------------------------------------------------------------------------------------------------------------------------------------------------------------------------------------------------------------------------------------------------------------------------------------------------------------------------------------------------------------------------------------------------------------------------------------------------------------------------------|
| <p>Q25</p> | <p>Metastatic uveal melanoma, which is melanoma that has spread beyond the eye, presents significant challenges in terms of treatment. Unlike cutaneous melanoma, systemic treatment options for metastatic uveal melanoma are limited, and there is no standard of care established. However, several systemic treatment approaches may be considered, including:</p> <ol style="list-style-type: none"> <li>1. Immunotherapy: Immune checkpoint inhibitors, such as pembrolizumab and nivolumab, have shown limited activity in metastatic uveal melanoma. While responses are generally less frequent compared to cutaneous melanoma, a subset of patients may experience tumor shrinkage and disease stabilization. Combination approaches with other immunotherapies or targeted agents are being explored in ongoing clinical trials.</li> <li>2. Targeted Therapy: Approximately 50% of uveal melanomas have activating mutations in the GNAQ or GNA11 genes. These mutations can be targeted with specific inhibitors, such as selumetinib, a MEK inhibitor. However, targeted therapies have shown limited efficacy as single agents and are more commonly used in combination approaches or in the context of clinical trials.</li> <li>3. Chemotherapy: Traditional chemotherapy agents, such as dacarbazine or temozolomide, have limited effectiveness in uveal melanoma and are typically reserved for cases where other treatment options have been exhausted.</li> <li>4. Liver-Directed Therapies: In cases where metastatic uveal melanoma is primarily localized to the liver, locoregional therapies like chemoembolization or radioembolization may be considered. These treatments deliver high doses of chemotherapy or radiation directly to the liver tumors.</li> </ol> <p>It is important to note that the response to systemic treatments in uveal melanoma can be variable, and individual patient factors, tumor characteristics, and treatment availability may influence treatment decisions. Participating in clinical trials, when available, can provide access to novel therapies and potential advancements in treatment options.</p> <p>Consulting with a healthcare professional who specializes in melanoma or uveal melanoma treatment is essential for personalized treatment recommendations based on your specific condition and available treatment options. They can provide you with the most up-to-date information and guidance regarding systemic treatment options for metastatic uveal melanoma.</p> | <p>Metastatic uveal melanoma, which is melanoma that has spread beyond the eye, poses significant challenges in terms of treatment options. Unlike cutaneous melanoma, there is no widely established standard of care for systemic treatment of metastatic uveal melanoma. However, several treatment approaches may be considered:</p> <ol style="list-style-type: none"> <li>1. Immunotherapy: Immune checkpoint inhibitors, such as pembrolizumab and nivolumab, have shown limited activity in metastatic uveal melanoma. While responses are generally less frequent compared to cutaneous melanoma, a subset of patients may experience tumor shrinkage and disease stabilization. Combination approaches with other immunotherapies or targeted agents are being explored in ongoing clinical trials.</li> <li>2. Targeted Therapy: Approximately 50% of uveal melanomas have activating mutations in the GNAQ or GNA11 genes. These mutations can be targeted with specific inhibitors, such as selumetinib, a MEK inhibitor. However, targeted therapies have shown limited efficacy as single agents and are more commonly used in combination approaches or in the context of clinical trials.</li> <li>3. Chemotherapy: Traditional chemotherapy agents, such as dacarbazine or temozolomide, have limited effectiveness in uveal melanoma and are typically reserved for cases where other treatment options have been exhausted.</li> <li>4. Liver-Directed Therapies: In cases where metastatic uveal melanoma is primarily localized to the liver, locoregional therapies like chemoembolization or radioembolization may be considered. These treatments deliver high doses of chemotherapy or radiation directly to the liver tumors.</li> <li>5. Clinical Trials: Participating in clinical trials offers access to novel therapies and potential advancements in treatment options for metastatic uveal melanoma. Experimental treatments may include targeted therapies, immunotherapies, or combination approaches.</li> </ol> <p>The choice of treatment depends on various factors, including the individual patient's overall health, tumor characteristics, and treatment goals. It is crucial to consult with a healthcare professional who specializes in the treatment of uveal melanoma to discuss available treatment options and to develop a personalized treatment plan based on your specific condition. They can provide you with the most up-to-date information and guidance regarding systemic treatment options for metastatic uveal melanoma.</p> | <p>Metastatic uveal melanoma, which is melanoma that has spread beyond the eye, is a challenging condition to treat. Unfortunately, there are limited systemic treatment options that have demonstrated significant effectiveness for metastatic uveal melanoma. However, there are some approaches that may be considered:</p> <ol style="list-style-type: none"> <li>1. Immunotherapy: Immune checkpoint inhibitors, such as pembrolizumab and nivolumab, have shown limited activity in metastatic uveal melanoma. While the response rates are generally lower compared to cutaneous melanoma, a subset of patients may experience some tumor shrinkage or disease stabilization. Combination approaches with other immunotherapies or targeted agents are being explored in ongoing clinical trials to improve treatment outcomes.</li> <li>2. Targeted Therapy: Approximately 50% of uveal melanomas have activating mutations in the GNAQ or GNA11 genes. These mutations can be targeted with specific inhibitors, such as selumetinib, a MEK inhibitor. However, targeted therapies have shown limited efficacy as single agents and are often used in combination with other treatments or in the context of clinical trials.</li> <li>3. Chemotherapy: Traditional chemotherapy agents, such as dacarbazine or temozolomide, have shown limited effectiveness in uveal melanoma and are typically reserved for cases where other treatment options have been exhausted.</li> <li>4. Liver-Directed Therapies: In cases where metastatic uveal melanoma is primarily localized in the liver, locoregional therapies like chemoembolization or radioembolization may be considered. These treatments deliver high doses of chemotherapy or radiation directly to the liver tumors.</li> <li>5. Clinical Trials: Participation in clinical trials can provide access to novel treatments and investigational approaches that are being evaluated for metastatic uveal melanoma. Experimental therapies may include targeted therapies, immunotherapies, or combination treatments.</li> </ol> <p>It is crucial to consult with a healthcare professional who specializes in the treatment of uveal melanoma to discuss the available treatment options, potential benefits, and risks associated with each option. They can provide personalized recommendations based on your specific condition, tumor characteristics, and available clinical trials or treatment options.</p> |
|------------|----------------------------------------------------------------------------------------------------------------------------------------------------------------------------------------------------------------------------------------------------------------------------------------------------------------------------------------------------------------------------------------------------------------------------------------------------------------------------------------------------------------------------------------------------------------------------------------------------------------------------------------------------------------------------------------------------------------------------------------------------------------------------------------------------------------------------------------------------------------------------------------------------------------------------------------------------------------------------------------------------------------------------------------------------------------------------------------------------------------------------------------------------------------------------------------------------------------------------------------------------------------------------------------------------------------------------------------------------------------------------------------------------------------------------------------------------------------------------------------------------------------------------------------------------------------------------------------------------------------------------------------------------------------------------------------------------------------------------------------------------------------------------------------------------------------------------------------------------------------------------------------------------------------------------------------------------------------------------------------------------------------------------------------------------------------------------------------------------------------------------------------------------------------------------------------------------------------------------------------------------------------------------------------------------------------------------------------------------------------------------------------------------------------------------------------------------------------------------------------------------------------------------------------------------------|---------------------------------------------------------------------------------------------------------------------------------------------------------------------------------------------------------------------------------------------------------------------------------------------------------------------------------------------------------------------------------------------------------------------------------------------------------------------------------------------------------------------------------------------------------------------------------------------------------------------------------------------------------------------------------------------------------------------------------------------------------------------------------------------------------------------------------------------------------------------------------------------------------------------------------------------------------------------------------------------------------------------------------------------------------------------------------------------------------------------------------------------------------------------------------------------------------------------------------------------------------------------------------------------------------------------------------------------------------------------------------------------------------------------------------------------------------------------------------------------------------------------------------------------------------------------------------------------------------------------------------------------------------------------------------------------------------------------------------------------------------------------------------------------------------------------------------------------------------------------------------------------------------------------------------------------------------------------------------------------------------------------------------------------------------------------------------------------------------------------------------------------------------------------------------------------------------------------------------------------------------------------------------------------------------------------------------------------------------------------------------------------------------------------------------------------------------------------------------------------------------------------------------------------------------------------------------------------|-------------------------------------------------------------------------------------------------------------------------------------------------------------------------------------------------------------------------------------------------------------------------------------------------------------------------------------------------------------------------------------------------------------------------------------------------------------------------------------------------------------------------------------------------------------------------------------------------------------------------------------------------------------------------------------------------------------------------------------------------------------------------------------------------------------------------------------------------------------------------------------------------------------------------------------------------------------------------------------------------------------------------------------------------------------------------------------------------------------------------------------------------------------------------------------------------------------------------------------------------------------------------------------------------------------------------------------------------------------------------------------------------------------------------------------------------------------------------------------------------------------------------------------------------------------------------------------------------------------------------------------------------------------------------------------------------------------------------------------------------------------------------------------------------------------------------------------------------------------------------------------------------------------------------------------------------------------------------------------------------------------------------------------------------------------------------------------------------------------------------------------------------------------------------------------------------------------------------------------------------------------------------------------------------------------------------------------------------------------------------------------------------------------------------------------------------------------------------------------------|

|            |                                                                                                                                                                                                                                                                                                                                                                                                                                                                                                                                                                                                                                                                                                                                                                                                                                                                                                                                                                                                                                                                                                                                                                                                                                                                                                                                                                                                                                                                                                                                                                                                                    |                                                                                                                                                                                                                                                                                                                                                                                                                                                                                                                                                                                                                                                                                                                                                                                                                                                                                                                                                                                                                                                                                                                                                                                                                                                                                                                                                                                                                                                                                                                                                                                                                                                                                                                                                                                                                                                                                                                  |                                                                                                                                                                                                                                                                                                                                                                                                                                                                                                                                                                                                                                                                                                                                                                                                                                                                                                                                                                                                                                                                                                                                                                                                                                                                                                                                                                                                                                                                                                                                                                                                                                         |
|------------|--------------------------------------------------------------------------------------------------------------------------------------------------------------------------------------------------------------------------------------------------------------------------------------------------------------------------------------------------------------------------------------------------------------------------------------------------------------------------------------------------------------------------------------------------------------------------------------------------------------------------------------------------------------------------------------------------------------------------------------------------------------------------------------------------------------------------------------------------------------------------------------------------------------------------------------------------------------------------------------------------------------------------------------------------------------------------------------------------------------------------------------------------------------------------------------------------------------------------------------------------------------------------------------------------------------------------------------------------------------------------------------------------------------------------------------------------------------------------------------------------------------------------------------------------------------------------------------------------------------------|------------------------------------------------------------------------------------------------------------------------------------------------------------------------------------------------------------------------------------------------------------------------------------------------------------------------------------------------------------------------------------------------------------------------------------------------------------------------------------------------------------------------------------------------------------------------------------------------------------------------------------------------------------------------------------------------------------------------------------------------------------------------------------------------------------------------------------------------------------------------------------------------------------------------------------------------------------------------------------------------------------------------------------------------------------------------------------------------------------------------------------------------------------------------------------------------------------------------------------------------------------------------------------------------------------------------------------------------------------------------------------------------------------------------------------------------------------------------------------------------------------------------------------------------------------------------------------------------------------------------------------------------------------------------------------------------------------------------------------------------------------------------------------------------------------------------------------------------------------------------------------------------------------------|-----------------------------------------------------------------------------------------------------------------------------------------------------------------------------------------------------------------------------------------------------------------------------------------------------------------------------------------------------------------------------------------------------------------------------------------------------------------------------------------------------------------------------------------------------------------------------------------------------------------------------------------------------------------------------------------------------------------------------------------------------------------------------------------------------------------------------------------------------------------------------------------------------------------------------------------------------------------------------------------------------------------------------------------------------------------------------------------------------------------------------------------------------------------------------------------------------------------------------------------------------------------------------------------------------------------------------------------------------------------------------------------------------------------------------------------------------------------------------------------------------------------------------------------------------------------------------------------------------------------------------------------|
| <p>Q26</p> | <p>Immunotherapy has shown limited effectiveness as a standalone treatment after surgery for colon or rectal cancers. Surgery is the primary treatment for localized colon or rectal cancers, with the goal of removing the tumor and surrounding tissues. After surgery, additional treatments may be recommended based on the specific characteristics of the tumor and the risk of recurrence.</p> <p>While immunotherapy has demonstrated significant efficacy in certain cancer types, such as melanoma and lung cancer, its role in colon and rectal cancers is still being explored. The use of immunotherapy after surgery, known as adjuvant immunotherapy, has not been established as a standard treatment approach for these cancers.</p> <p>However, there are ongoing clinical trials investigating the use of immune checkpoint inhibitors in the adjuvant setting for colon and rectal cancers. These trials are evaluating the potential benefits of adjuvant immunotherapy to improve outcomes and reduce the risk of recurrence. The results from these trials will help determine the efficacy of immunotherapy in this setting.</p> <p>It is important to consult with a healthcare professional who specializes in the treatment of colon and rectal cancers to discuss the available treatment options, including immunotherapy, and to develop a personalized treatment plan based on your specific condition and risk factors. They can provide you with the most up-to-date information and guidance regarding adjuvant treatment options after surgery for colon or rectal cancers.</p> | <p>The effectiveness of immunotherapy after surgery for colon or rectal cancers, known as adjuvant immunotherapy, is currently being investigated in clinical trials. The use of immunotherapy as a standalone treatment in the adjuvant setting has not yet been established as a standard approach for these cancers.</p> <p>Surgery is the primary treatment for localized colon or rectal cancers, with the aim of removing the tumor and nearby tissues. After surgery, additional treatments such as chemotherapy or radiation therapy may be recommended based on the stage and risk factors of the cancer.</p> <p>Immunotherapy, specifically immune checkpoint inhibitors, has demonstrated significant efficacy in certain cancer types by enhancing the body's immune response against cancer cells. However, the role of immunotherapy in colon and rectal cancers, particularly in the adjuvant setting, is still being investigated.</p> <p>Clinical trials are currently evaluating the potential benefits of adjuvant immunotherapy in colon and rectal cancers. These trials aim to determine whether adding immunotherapy after surgery can improve outcomes and reduce the risk of cancer recurrence. It is important to note that the results of these trials are not yet available, and the use of immunotherapy in the adjuvant setting for colon or rectal cancers should be discussed with a healthcare professional who specializes in the treatment of these cancers.</p> <p>Consulting with an oncologist or healthcare provider who is knowledgeable about the latest research and treatment options can provide you with personalized recommendations based on your specific condition, stage of cancer, and risk factors. They can provide you with the most up-to-date information and guidance regarding the use of immunotherapy after surgery for colon or rectal cancers.</p> | <p>The effectiveness of immunotherapy after surgery for colon or rectal cancers, known as adjuvant immunotherapy, is still being investigated. Adjuvant treatment aims to eliminate any remaining cancer cells after surgery to reduce the risk of recurrence and improve overall outcomes. While immunotherapy has shown significant efficacy in certain cancer types, its role in colon and rectal cancers in the adjuvant setting is not yet well-established.</p> <p>Surgery is the primary treatment for localized colon or rectal cancers, and additional treatments such as chemotherapy or radiation therapy may be recommended based on the stage and other factors. The use of immunotherapy in the adjuvant setting is currently being studied in clinical trials to evaluate its potential benefits.</p> <p>Preliminary results from some ongoing clinical trials exploring adjuvant immunotherapy in colon and rectal cancers have shown promising findings. However, it is important to note that the final results from these trials are not yet available, and the use of immunotherapy as adjuvant therapy for colon or rectal cancers is not currently considered a standard of care.</p> <p>It is crucial to consult with an oncologist or healthcare professional who specializes in the treatment of colon or rectal cancers to discuss the available treatment options, including adjuvant immunotherapy. They can provide personalized recommendations based on your specific condition, stage of cancer, and individual factors, taking into account the latest research and clinical trial data available.</p> |
|------------|--------------------------------------------------------------------------------------------------------------------------------------------------------------------------------------------------------------------------------------------------------------------------------------------------------------------------------------------------------------------------------------------------------------------------------------------------------------------------------------------------------------------------------------------------------------------------------------------------------------------------------------------------------------------------------------------------------------------------------------------------------------------------------------------------------------------------------------------------------------------------------------------------------------------------------------------------------------------------------------------------------------------------------------------------------------------------------------------------------------------------------------------------------------------------------------------------------------------------------------------------------------------------------------------------------------------------------------------------------------------------------------------------------------------------------------------------------------------------------------------------------------------------------------------------------------------------------------------------------------------|------------------------------------------------------------------------------------------------------------------------------------------------------------------------------------------------------------------------------------------------------------------------------------------------------------------------------------------------------------------------------------------------------------------------------------------------------------------------------------------------------------------------------------------------------------------------------------------------------------------------------------------------------------------------------------------------------------------------------------------------------------------------------------------------------------------------------------------------------------------------------------------------------------------------------------------------------------------------------------------------------------------------------------------------------------------------------------------------------------------------------------------------------------------------------------------------------------------------------------------------------------------------------------------------------------------------------------------------------------------------------------------------------------------------------------------------------------------------------------------------------------------------------------------------------------------------------------------------------------------------------------------------------------------------------------------------------------------------------------------------------------------------------------------------------------------------------------------------------------------------------------------------------------------|-----------------------------------------------------------------------------------------------------------------------------------------------------------------------------------------------------------------------------------------------------------------------------------------------------------------------------------------------------------------------------------------------------------------------------------------------------------------------------------------------------------------------------------------------------------------------------------------------------------------------------------------------------------------------------------------------------------------------------------------------------------------------------------------------------------------------------------------------------------------------------------------------------------------------------------------------------------------------------------------------------------------------------------------------------------------------------------------------------------------------------------------------------------------------------------------------------------------------------------------------------------------------------------------------------------------------------------------------------------------------------------------------------------------------------------------------------------------------------------------------------------------------------------------------------------------------------------------------------------------------------------------|

|            |                                                                                                                                                                                                                                                                                                                                                                                                                                                                                                                                                                                                                                                                                                                                                                                                                                                                                                                                                                                                                                                                                                                                                                                                                                                                                                                                                                                                                                                                                                                                                                                                                                                                                                                                                                                                                                                                                                                                                                                                                                                                                                                                                                                                                                                                                |                                                                                                                                                                                                                                                                                                                                                                                                                                                                                                                                                                                                                                                                                                                                                                                                                                                                                                                                                                                                                                                                                                                                                                                                                                                                                                                                                                                                                                                                                                                                                                                                                                                                                                                                                                                                                                                                                                                                                                                                                                                                                                                                                                                                                                                                                                                                                                                                                                                                                                                                                                     |                                                                                                                                                                                                                                                                                                                                                                                                                                                                                                                                                                                                                                                                                                                                                                                                                                                                                                                                                                                                                                                                                                                                                                                                                                                                                                                                                                                                                                                                                                                                                                                                                                                                                                                                                                                                                                                                                       |
|------------|--------------------------------------------------------------------------------------------------------------------------------------------------------------------------------------------------------------------------------------------------------------------------------------------------------------------------------------------------------------------------------------------------------------------------------------------------------------------------------------------------------------------------------------------------------------------------------------------------------------------------------------------------------------------------------------------------------------------------------------------------------------------------------------------------------------------------------------------------------------------------------------------------------------------------------------------------------------------------------------------------------------------------------------------------------------------------------------------------------------------------------------------------------------------------------------------------------------------------------------------------------------------------------------------------------------------------------------------------------------------------------------------------------------------------------------------------------------------------------------------------------------------------------------------------------------------------------------------------------------------------------------------------------------------------------------------------------------------------------------------------------------------------------------------------------------------------------------------------------------------------------------------------------------------------------------------------------------------------------------------------------------------------------------------------------------------------------------------------------------------------------------------------------------------------------------------------------------------------------------------------------------------------------|---------------------------------------------------------------------------------------------------------------------------------------------------------------------------------------------------------------------------------------------------------------------------------------------------------------------------------------------------------------------------------------------------------------------------------------------------------------------------------------------------------------------------------------------------------------------------------------------------------------------------------------------------------------------------------------------------------------------------------------------------------------------------------------------------------------------------------------------------------------------------------------------------------------------------------------------------------------------------------------------------------------------------------------------------------------------------------------------------------------------------------------------------------------------------------------------------------------------------------------------------------------------------------------------------------------------------------------------------------------------------------------------------------------------------------------------------------------------------------------------------------------------------------------------------------------------------------------------------------------------------------------------------------------------------------------------------------------------------------------------------------------------------------------------------------------------------------------------------------------------------------------------------------------------------------------------------------------------------------------------------------------------------------------------------------------------------------------------------------------------------------------------------------------------------------------------------------------------------------------------------------------------------------------------------------------------------------------------------------------------------------------------------------------------------------------------------------------------------------------------------------------------------------------------------------------------|---------------------------------------------------------------------------------------------------------------------------------------------------------------------------------------------------------------------------------------------------------------------------------------------------------------------------------------------------------------------------------------------------------------------------------------------------------------------------------------------------------------------------------------------------------------------------------------------------------------------------------------------------------------------------------------------------------------------------------------------------------------------------------------------------------------------------------------------------------------------------------------------------------------------------------------------------------------------------------------------------------------------------------------------------------------------------------------------------------------------------------------------------------------------------------------------------------------------------------------------------------------------------------------------------------------------------------------------------------------------------------------------------------------------------------------------------------------------------------------------------------------------------------------------------------------------------------------------------------------------------------------------------------------------------------------------------------------------------------------------------------------------------------------------------------------------------------------------------------------------------------------|
| <p>Q27</p> | <p>Immunotherapy has shown some promise in the treatment of primary brain tumors, including glioblastoma multiforme (GBM). GBM is a highly aggressive and difficult-to-treat form of brain cancer, and treatment options have historically been limited.</p> <p>Immune checkpoint inhibitors, a type of immunotherapy that targets proteins involved in suppressing the immune response, have been investigated in GBM. Clinical trials have evaluated the use of immune checkpoint inhibitors, such as pembrolizumab and nivolumab, either as monotherapy or in combination with other treatments. However, the results have been mixed, with only a subset of patients experiencing significant clinical benefit.</p> <p>GBM tumors create a challenging microenvironment that limits the immune response, including the presence of an immunosuppressive tumor microenvironment and the blood-brain barrier. These factors can reduce the effectiveness of immunotherapy in GBM.</p> <p>To overcome these challenges, ongoing research is exploring various strategies to enhance the efficacy of immunotherapy in GBM. These strategies include combining immune checkpoint inhibitors with other immunotherapies, such as vaccines or adoptive cell therapies, as well as targeting specific immune-related pathways involved in GBM progression.</p> <p>Additionally, personalized approaches that consider the unique molecular characteristics of each patient's tumor are being investigated to identify potential biomarkers that can predict response to immunotherapy and guide treatment decisions.</p> <p>While the role of immunotherapy in GBM is still evolving, it is important to note that standard treatment options for GBM typically involve surgery, radiation therapy, and chemotherapy. Immunotherapy may be considered in specific cases as part of a clinical trial or in combination with other treatments, but its effectiveness as a standalone therapy for GBM is still being studied.</p> <p>Consulting with a healthcare professional who specializes in brain cancer or oncology will provide you with the most accurate and up-to-date information regarding treatment options for GBM, including the potential role of immunotherapy.</p> | <p>Immunotherapy has shown limited efficacy as a standalone treatment for glioblastoma multiforme (GBM), which is a highly aggressive and difficult-to-treat primary brain tumor. While immunotherapy has been successful in treating various cancer types, the unique characteristics of GBM present challenges to its effectiveness.</p> <p>GBM tumors have an immunosuppressive microenvironment and the presence of the blood-brain barrier, which can limit the immune response and hinder the delivery of immunotherapeutic agents to the tumor site. Additionally, GBM tumors are highly heterogeneous and can evolve rapidly, making them resistant to immune attacks.</p> <p>Despite these challenges, ongoing research and clinical trials are exploring different immunotherapy approaches for GBM. Some strategies being investigated include:</p> <ol style="list-style-type: none"> <li>1. Immune checkpoint inhibitors: Clinical trials have evaluated immune checkpoint inhibitors, such as pembrolizumab and nivolumab, either as monotherapy or in combination with other treatments. While some patients have shown partial responses or disease stabilization, the overall response rates have been modest.</li> <li>2. Personalized neoantigen vaccines: Vaccines targeting specific neoantigens, which are unique to each patient's tumor, are being developed. These vaccines aim to stimulate the immune system to recognize and attack the tumor cells more effectively.</li> <li>3. Adoptive cell therapies: Approaches like chimeric antigen receptor (CAR) T-cell therapy are being explored in GBM. CAR T-cell therapy involves modifying a patient's own immune cells to recognize and attack cancer cells.</li> <li>4. Combination therapies: Combinations of immunotherapies with other treatment modalities, such as radiation therapy, chemotherapy, or targeted therapies, are being investigated to enhance the immune response and improve outcomes.</li> </ol> <p>While the effectiveness of immunotherapy as a standalone treatment for GBM is limited, these emerging approaches hold promise and are actively being researched in clinical trials. It is important to consult with a healthcare professional who specializes in the treatment of GBM to discuss available treatment options, including immunotherapy, and to determine the most appropriate approach based on your specific condition. They can provide you with the most up-to-date information and guidance regarding immunotherapy options for GBM.</p> | <p>Immunotherapy has shown limited effectiveness as a standalone treatment for glioblastoma multiforme (GBM), which is a highly aggressive primary brain tumor. GBM poses unique challenges for immunotherapy due to its location within the brain, the blood-brain barrier, and the immunosuppressive tumor microenvironment.</p> <p>While immunotherapy has demonstrated significant success in other cancer types, such as melanoma and lung cancer, its efficacy in GBM has been modest. Immune checkpoint inhibitors, which are a type of immunotherapy that targets proteins involved in suppressing the immune response, have been studied in GBM. However, clinical trials evaluating immune checkpoint inhibitors as monotherapy in GBM have not shown significant improvement in overall survival.</p> <p>Nonetheless, research and clinical trials continue to explore immunotherapy approaches in GBM. Combination treatments, such as combining immune checkpoint inhibitors with other immunotherapies, chemotherapy, targeted therapies, or radiation therapy, are being investigated to enhance the immune response and improve outcomes. Additionally, personalized vaccines targeting specific mutations in the tumor (neoantigen vaccines) and adoptive cell therapies, such as CAR-T cell therapy, are being explored in clinical trials for GBM.</p> <p>It's important to note that treatment decisions for GBM should be made on an individual basis, considering factors such as the specific tumor characteristics, overall health, and available treatment options. Consulting with a healthcare professional who specializes in the treatment of brain tumors will provide the most accurate and up-to-date information regarding immunotherapy options for GBM and help determine the most appropriate treatment approach for your specific situation.</p> |
|------------|--------------------------------------------------------------------------------------------------------------------------------------------------------------------------------------------------------------------------------------------------------------------------------------------------------------------------------------------------------------------------------------------------------------------------------------------------------------------------------------------------------------------------------------------------------------------------------------------------------------------------------------------------------------------------------------------------------------------------------------------------------------------------------------------------------------------------------------------------------------------------------------------------------------------------------------------------------------------------------------------------------------------------------------------------------------------------------------------------------------------------------------------------------------------------------------------------------------------------------------------------------------------------------------------------------------------------------------------------------------------------------------------------------------------------------------------------------------------------------------------------------------------------------------------------------------------------------------------------------------------------------------------------------------------------------------------------------------------------------------------------------------------------------------------------------------------------------------------------------------------------------------------------------------------------------------------------------------------------------------------------------------------------------------------------------------------------------------------------------------------------------------------------------------------------------------------------------------------------------------------------------------------------------|---------------------------------------------------------------------------------------------------------------------------------------------------------------------------------------------------------------------------------------------------------------------------------------------------------------------------------------------------------------------------------------------------------------------------------------------------------------------------------------------------------------------------------------------------------------------------------------------------------------------------------------------------------------------------------------------------------------------------------------------------------------------------------------------------------------------------------------------------------------------------------------------------------------------------------------------------------------------------------------------------------------------------------------------------------------------------------------------------------------------------------------------------------------------------------------------------------------------------------------------------------------------------------------------------------------------------------------------------------------------------------------------------------------------------------------------------------------------------------------------------------------------------------------------------------------------------------------------------------------------------------------------------------------------------------------------------------------------------------------------------------------------------------------------------------------------------------------------------------------------------------------------------------------------------------------------------------------------------------------------------------------------------------------------------------------------------------------------------------------------------------------------------------------------------------------------------------------------------------------------------------------------------------------------------------------------------------------------------------------------------------------------------------------------------------------------------------------------------------------------------------------------------------------------------------------------|---------------------------------------------------------------------------------------------------------------------------------------------------------------------------------------------------------------------------------------------------------------------------------------------------------------------------------------------------------------------------------------------------------------------------------------------------------------------------------------------------------------------------------------------------------------------------------------------------------------------------------------------------------------------------------------------------------------------------------------------------------------------------------------------------------------------------------------------------------------------------------------------------------------------------------------------------------------------------------------------------------------------------------------------------------------------------------------------------------------------------------------------------------------------------------------------------------------------------------------------------------------------------------------------------------------------------------------------------------------------------------------------------------------------------------------------------------------------------------------------------------------------------------------------------------------------------------------------------------------------------------------------------------------------------------------------------------------------------------------------------------------------------------------------------------------------------------------------------------------------------------------|

|                   |                                                                                                                                                                                                                                                                                                                                                                                                                                                                                                                                                                                                                                                                                                                                                                                                                                                                                                                                                                                                                                                                                                                                                                                                                                                                                                                                                                                                                                                                                                                                                                     |                                                                                                                                                                                                                                                                                                                                                                                                                                                                                                                                                                                                                                                                                                                                                                                                                                                                                                                                                                                                                                                                                                                                                                                                                                                                                                                                                                                                                                                                                                                                                                                                                                                                         |                                                                                                                                                                                                                                                                                                                                                                                                                                                                                                                                                                                                                                                                                                                                                                                                                                                                                                                                                                                                                                                                                                                                                                                                                                                                                                                                                                                                                                                                                                                                                                                                         |
|-------------------|---------------------------------------------------------------------------------------------------------------------------------------------------------------------------------------------------------------------------------------------------------------------------------------------------------------------------------------------------------------------------------------------------------------------------------------------------------------------------------------------------------------------------------------------------------------------------------------------------------------------------------------------------------------------------------------------------------------------------------------------------------------------------------------------------------------------------------------------------------------------------------------------------------------------------------------------------------------------------------------------------------------------------------------------------------------------------------------------------------------------------------------------------------------------------------------------------------------------------------------------------------------------------------------------------------------------------------------------------------------------------------------------------------------------------------------------------------------------------------------------------------------------------------------------------------------------|-------------------------------------------------------------------------------------------------------------------------------------------------------------------------------------------------------------------------------------------------------------------------------------------------------------------------------------------------------------------------------------------------------------------------------------------------------------------------------------------------------------------------------------------------------------------------------------------------------------------------------------------------------------------------------------------------------------------------------------------------------------------------------------------------------------------------------------------------------------------------------------------------------------------------------------------------------------------------------------------------------------------------------------------------------------------------------------------------------------------------------------------------------------------------------------------------------------------------------------------------------------------------------------------------------------------------------------------------------------------------------------------------------------------------------------------------------------------------------------------------------------------------------------------------------------------------------------------------------------------------------------------------------------------------|---------------------------------------------------------------------------------------------------------------------------------------------------------------------------------------------------------------------------------------------------------------------------------------------------------------------------------------------------------------------------------------------------------------------------------------------------------------------------------------------------------------------------------------------------------------------------------------------------------------------------------------------------------------------------------------------------------------------------------------------------------------------------------------------------------------------------------------------------------------------------------------------------------------------------------------------------------------------------------------------------------------------------------------------------------------------------------------------------------------------------------------------------------------------------------------------------------------------------------------------------------------------------------------------------------------------------------------------------------------------------------------------------------------------------------------------------------------------------------------------------------------------------------------------------------------------------------------------------------|
| <p><b>Q28</b></p> | <p>As an AI language model, I cannot provide personalized medical advice. The decision to receive immunotherapy for kidney cancer, even with a good prognosis and a low IMDC risk score, should be made in consultation with a healthcare professional who specializes in the treatment of kidney cancer. They will consider various factors, including your specific tumor characteristics, overall health, treatment goals, and the latest clinical guidelines.</p> <p>Immunotherapy has become an important treatment option for advanced kidney cancer, particularly with the use of immune checkpoint inhibitors. These medications can activate the immune system to recognize and attack cancer cells. However, the selection of treatment depends on several factors, including the risk assessment and individual patient characteristics.</p> <p>While a low IMDC risk score suggests a favorable prognosis, it does not necessarily dictate the need for or benefit from immunotherapy. Additional factors, such as the presence of specific molecular or genetic markers in the tumor, may also influence treatment decisions.</p> <p>It is crucial to consult with a healthcare professional who specializes in kidney cancer to discuss the available treatment options, including immunotherapy, and to weigh the potential benefits and risks in your specific case. They will consider your individual circumstances and provide you with the most accurate and personalized advice regarding the use of immunotherapy for your kidney cancer.</p> | <p>A good prognosis kidney cancer with an IMDC risk score of zero suggests a lower risk of disease progression and a favorable outlook. In such cases, the use of immunotherapy as a primary treatment may not be the standard approach. However, treatment decisions should always be made in consultation with a healthcare professional who specializes in kidney cancer and has access to your complete medical history.</p> <p>Immunotherapy, specifically immune checkpoint inhibitors, has become an important treatment option for advanced kidney cancer. While it has demonstrated significant effectiveness in improving outcomes for many patients, its use is typically recommended for cases with specific clinical indications, such as intermediate or poor-risk disease, or cases where targeted therapies are not suitable or have not been effective.</p> <p>In the case of a good prognosis with a low IMDC risk score, the primary treatment approach may involve active surveillance, surgery, or targeted therapies, depending on the specific characteristics of the tumor and individual patient factors. The decision to use immunotherapy would depend on several factors, including the presence of specific molecular or genetic markers in the tumor and consideration of potential benefits and risks.</p> <p>It is important to have a detailed discussion with your healthcare professional to evaluate your specific case and consider the available treatment options. They will be able to provide personalized recommendations based on your unique circumstances and the most current guidelines for kidney cancer treatment.</p> | <p>In cases of good prognosis kidney cancer with an IMDC risk score of zero, the need for immunotherapy as a primary treatment may be less established. The IMDC risk score is a tool used to assess the risk of disease progression and overall prognosis in metastatic renal cell carcinoma (RCC) patients.</p> <p>Immunotherapy, particularly immune checkpoint inhibitors, has shown significant effectiveness in treating advanced kidney cancer. However, its use is typically recommended for cases with intermediate or poor-risk disease or when targeted therapies have not been effective.</p> <p>For patients with a good prognosis and low-risk disease, the primary treatment approach may involve active surveillance, surgery, or targeted therapies depending on the specific characteristics of the tumor and individual patient factors.</p> <p>It is important to have a thorough discussion with your healthcare professional who specializes in kidney cancer treatment. They will consider factors such as the specific characteristics of your tumor, your overall health, and available treatment options to determine the most appropriate treatment approach for your specific case.</p> <p>Based on the current information, immunotherapy may not be the standard first-line treatment for your particular situation. However, your healthcare professional will provide personalized recommendations based on your unique circumstances and the latest clinical guidelines to ensure you receive the most appropriate and effective treatment for your kidney cancer.</p> |
|-------------------|---------------------------------------------------------------------------------------------------------------------------------------------------------------------------------------------------------------------------------------------------------------------------------------------------------------------------------------------------------------------------------------------------------------------------------------------------------------------------------------------------------------------------------------------------------------------------------------------------------------------------------------------------------------------------------------------------------------------------------------------------------------------------------------------------------------------------------------------------------------------------------------------------------------------------------------------------------------------------------------------------------------------------------------------------------------------------------------------------------------------------------------------------------------------------------------------------------------------------------------------------------------------------------------------------------------------------------------------------------------------------------------------------------------------------------------------------------------------------------------------------------------------------------------------------------------------|-------------------------------------------------------------------------------------------------------------------------------------------------------------------------------------------------------------------------------------------------------------------------------------------------------------------------------------------------------------------------------------------------------------------------------------------------------------------------------------------------------------------------------------------------------------------------------------------------------------------------------------------------------------------------------------------------------------------------------------------------------------------------------------------------------------------------------------------------------------------------------------------------------------------------------------------------------------------------------------------------------------------------------------------------------------------------------------------------------------------------------------------------------------------------------------------------------------------------------------------------------------------------------------------------------------------------------------------------------------------------------------------------------------------------------------------------------------------------------------------------------------------------------------------------------------------------------------------------------------------------------------------------------------------------|---------------------------------------------------------------------------------------------------------------------------------------------------------------------------------------------------------------------------------------------------------------------------------------------------------------------------------------------------------------------------------------------------------------------------------------------------------------------------------------------------------------------------------------------------------------------------------------------------------------------------------------------------------------------------------------------------------------------------------------------------------------------------------------------------------------------------------------------------------------------------------------------------------------------------------------------------------------------------------------------------------------------------------------------------------------------------------------------------------------------------------------------------------------------------------------------------------------------------------------------------------------------------------------------------------------------------------------------------------------------------------------------------------------------------------------------------------------------------------------------------------------------------------------------------------------------------------------------------------|

|            |                                                                                                                                                                                                                                                                                                                                                                                                                                                                                                                                                                                                                                                                                                                                                                                                                                                                                                                                                                                                                                                                                                                                                                                                                                                                                                                                                                                                                                                                                                                                                                                                                                                                                                                                                                                                                     |                                                                                                                                                                                                                                                                                                                                                                                                                                                                                                                                                                                                                                                                                                                                                                                                                                                                                                                                                                                                                                                                                                                                                                                                                                                                                                                                                                                                                                                                                                                                                                                                                                                                                                                                                                                                                |                                                                                                                                                                                                                                                                                                                                                                                                                                                                                                                                                                                                                                                                                                                                                                                                                                                                                                                                                                                                                                                                                                                                                                                                                                                                                                                                                                                                                                                                                                                                                                                                                                                                                                                                                                                                              |
|------------|---------------------------------------------------------------------------------------------------------------------------------------------------------------------------------------------------------------------------------------------------------------------------------------------------------------------------------------------------------------------------------------------------------------------------------------------------------------------------------------------------------------------------------------------------------------------------------------------------------------------------------------------------------------------------------------------------------------------------------------------------------------------------------------------------------------------------------------------------------------------------------------------------------------------------------------------------------------------------------------------------------------------------------------------------------------------------------------------------------------------------------------------------------------------------------------------------------------------------------------------------------------------------------------------------------------------------------------------------------------------------------------------------------------------------------------------------------------------------------------------------------------------------------------------------------------------------------------------------------------------------------------------------------------------------------------------------------------------------------------------------------------------------------------------------------------------|----------------------------------------------------------------------------------------------------------------------------------------------------------------------------------------------------------------------------------------------------------------------------------------------------------------------------------------------------------------------------------------------------------------------------------------------------------------------------------------------------------------------------------------------------------------------------------------------------------------------------------------------------------------------------------------------------------------------------------------------------------------------------------------------------------------------------------------------------------------------------------------------------------------------------------------------------------------------------------------------------------------------------------------------------------------------------------------------------------------------------------------------------------------------------------------------------------------------------------------------------------------------------------------------------------------------------------------------------------------------------------------------------------------------------------------------------------------------------------------------------------------------------------------------------------------------------------------------------------------------------------------------------------------------------------------------------------------------------------------------------------------------------------------------------------------|--------------------------------------------------------------------------------------------------------------------------------------------------------------------------------------------------------------------------------------------------------------------------------------------------------------------------------------------------------------------------------------------------------------------------------------------------------------------------------------------------------------------------------------------------------------------------------------------------------------------------------------------------------------------------------------------------------------------------------------------------------------------------------------------------------------------------------------------------------------------------------------------------------------------------------------------------------------------------------------------------------------------------------------------------------------------------------------------------------------------------------------------------------------------------------------------------------------------------------------------------------------------------------------------------------------------------------------------------------------------------------------------------------------------------------------------------------------------------------------------------------------------------------------------------------------------------------------------------------------------------------------------------------------------------------------------------------------------------------------------------------------------------------------------------------------|
| <p>Q29</p> | <p>Ovarian cancer with a POLE (DNA polymerase epsilon) mutation is relatively rare but has been associated with specific characteristics that may have implications for immunotherapy. POLE mutations are linked to a high tumor mutational burden (TMB), meaning that these tumors have a large number of genetic mutations. High TMB has been associated with increased response rates to immune checkpoint inhibitors, a type of immunotherapy.</p> <p>Immunotherapy, particularly immune checkpoint inhibitors, has shown significant efficacy in certain cancer types characterized by high TMB. These drugs work by blocking the proteins that suppress the immune response, allowing the immune system to better recognize and attack cancer cells.</p> <p>While the effectiveness of immunotherapy in ovarian cancer generally has been limited, there is emerging evidence suggesting that ovarian cancers with high TMB, including those with POLE mutations, may be more responsive to immunotherapy. However, it's important to note that not all patients with POLE-mutated ovarian cancer will respond to immunotherapy, and additional factors beyond the mutation itself can influence treatment outcomes.</p> <p>To determine the most appropriate treatment approach for your specific case, it is crucial to consult with a healthcare professional who specializes in the treatment of ovarian cancer. They will consider factors such as the stage of your cancer, the presence of other genetic mutations, and your overall health to provide personalized recommendations. They will take into account the latest research and clinical guidelines to determine if immunotherapy, either as a single-agent or in combination with other treatments, may be beneficial in your situation.</p> | <p>Ovarian cancer with a POLE (DNA polymerase epsilon) mutation is relatively rare, but it has been associated with certain characteristics that may have implications for immunotherapy. POLE mutations can result in a high tumor mutational burden (TMB), meaning that these tumors have a large number of genetic mutations. High TMB has been linked to increased response rates to immune checkpoint inhibitors, a type of immunotherapy.</p> <p>Immunotherapy, particularly immune checkpoint inhibitors, has shown significant efficacy in certain cancer types characterized by high TMB. These drugs work by blocking the proteins that suppress the immune response, allowing the immune system to better recognize and attack cancer cells.</p> <p>While the effectiveness of immunotherapy in ovarian cancer overall has been limited, there is emerging evidence suggesting that ovarian cancers with high TMB, including those with POLE mutations, may be more responsive to immunotherapy. However, it's important to note that not all patients with POLE-mutated ovarian cancer will respond to immunotherapy, and additional factors beyond the mutation itself can influence treatment outcomes.</p> <p>To determine the most appropriate treatment approach for your specific case, it is crucial to consult with a healthcare professional who specializes in the treatment of ovarian cancer. They will consider factors such as the stage of your cancer, the presence of other genetic mutations, and your overall health to provide personalized recommendations. They will take into account the latest research and clinical guidelines to determine if immunotherapy, either as a single-agent or in combination with other treatments, may be beneficial in your situation.</p> | <p>Ovarian cancer with a POLE (DNA polymerase epsilon) mutation is relatively rare, but it has been associated with certain characteristics that may have implications for immunotherapy. POLE mutations can lead to a high tumor mutational burden (TMB), meaning that these tumors have a large number of genetic mutations. High TMB has been linked to increased response rates to immune checkpoint inhibitors, a type of immunotherapy.</p> <p>Immunotherapy, particularly immune checkpoint inhibitors, has shown significant efficacy in certain cancer types characterized by high TMB. These drugs work by blocking the proteins that suppress the immune response, allowing the immune system to better recognize and attack cancer cells.</p> <p>While the effectiveness of immunotherapy in ovarian cancer overall has been limited, there is emerging evidence suggesting that ovarian cancers with high TMB, including those with POLE mutations, may be more responsive to immunotherapy. However, it's important to note that not all patients with POLE-mutated ovarian cancer will respond to immunotherapy, and additional factors beyond the mutation itself can influence treatment outcomes.</p> <p>To determine the most appropriate treatment approach for your specific case, it is crucial to consult with a healthcare professional who specializes in the treatment of ovarian cancer. They will consider factors such as the stage of your cancer, the presence of other genetic mutations, and your overall health to provide personalized recommendations. They will take into account the latest research and clinical guidelines to determine if immunotherapy, either as a single-agent or in combination with other treatments, may be beneficial in your situation.</p> |
|------------|---------------------------------------------------------------------------------------------------------------------------------------------------------------------------------------------------------------------------------------------------------------------------------------------------------------------------------------------------------------------------------------------------------------------------------------------------------------------------------------------------------------------------------------------------------------------------------------------------------------------------------------------------------------------------------------------------------------------------------------------------------------------------------------------------------------------------------------------------------------------------------------------------------------------------------------------------------------------------------------------------------------------------------------------------------------------------------------------------------------------------------------------------------------------------------------------------------------------------------------------------------------------------------------------------------------------------------------------------------------------------------------------------------------------------------------------------------------------------------------------------------------------------------------------------------------------------------------------------------------------------------------------------------------------------------------------------------------------------------------------------------------------------------------------------------------------|----------------------------------------------------------------------------------------------------------------------------------------------------------------------------------------------------------------------------------------------------------------------------------------------------------------------------------------------------------------------------------------------------------------------------------------------------------------------------------------------------------------------------------------------------------------------------------------------------------------------------------------------------------------------------------------------------------------------------------------------------------------------------------------------------------------------------------------------------------------------------------------------------------------------------------------------------------------------------------------------------------------------------------------------------------------------------------------------------------------------------------------------------------------------------------------------------------------------------------------------------------------------------------------------------------------------------------------------------------------------------------------------------------------------------------------------------------------------------------------------------------------------------------------------------------------------------------------------------------------------------------------------------------------------------------------------------------------------------------------------------------------------------------------------------------------|--------------------------------------------------------------------------------------------------------------------------------------------------------------------------------------------------------------------------------------------------------------------------------------------------------------------------------------------------------------------------------------------------------------------------------------------------------------------------------------------------------------------------------------------------------------------------------------------------------------------------------------------------------------------------------------------------------------------------------------------------------------------------------------------------------------------------------------------------------------------------------------------------------------------------------------------------------------------------------------------------------------------------------------------------------------------------------------------------------------------------------------------------------------------------------------------------------------------------------------------------------------------------------------------------------------------------------------------------------------------------------------------------------------------------------------------------------------------------------------------------------------------------------------------------------------------------------------------------------------------------------------------------------------------------------------------------------------------------------------------------------------------------------------------------------------|

|                   |                                                                                                                                                                                                                                                                                                                                                                                                                                                                                                                                                                                                                                                                                                                                                                                                                                                                                                                                                                                                                                                                                                                                                                                                                                                                                                                                                                                                                                                                                                                                                                                                                                                                                   |                                                                                                                                                                                                                                                                                                                                                                                                                                                                                                                                                                                                                                                                                                                                                                                                                                                                                                                                                                                                                                                                                                                                                                                                                                                                                                                                                                                                                                                                                                                                                                                                                                                                                                                            |                                                                                                                                                                                                                                                                                                                                                                                                                                                                                                                                                                                                                                                                                                                                                                                                                                                                                                                                                                                                                                                                                                                                                                                                                                                                                                                                                                                                                                                                                                                                                                                                                                                                                                                                                  |
|-------------------|-----------------------------------------------------------------------------------------------------------------------------------------------------------------------------------------------------------------------------------------------------------------------------------------------------------------------------------------------------------------------------------------------------------------------------------------------------------------------------------------------------------------------------------------------------------------------------------------------------------------------------------------------------------------------------------------------------------------------------------------------------------------------------------------------------------------------------------------------------------------------------------------------------------------------------------------------------------------------------------------------------------------------------------------------------------------------------------------------------------------------------------------------------------------------------------------------------------------------------------------------------------------------------------------------------------------------------------------------------------------------------------------------------------------------------------------------------------------------------------------------------------------------------------------------------------------------------------------------------------------------------------------------------------------------------------|----------------------------------------------------------------------------------------------------------------------------------------------------------------------------------------------------------------------------------------------------------------------------------------------------------------------------------------------------------------------------------------------------------------------------------------------------------------------------------------------------------------------------------------------------------------------------------------------------------------------------------------------------------------------------------------------------------------------------------------------------------------------------------------------------------------------------------------------------------------------------------------------------------------------------------------------------------------------------------------------------------------------------------------------------------------------------------------------------------------------------------------------------------------------------------------------------------------------------------------------------------------------------------------------------------------------------------------------------------------------------------------------------------------------------------------------------------------------------------------------------------------------------------------------------------------------------------------------------------------------------------------------------------------------------------------------------------------------------|--------------------------------------------------------------------------------------------------------------------------------------------------------------------------------------------------------------------------------------------------------------------------------------------------------------------------------------------------------------------------------------------------------------------------------------------------------------------------------------------------------------------------------------------------------------------------------------------------------------------------------------------------------------------------------------------------------------------------------------------------------------------------------------------------------------------------------------------------------------------------------------------------------------------------------------------------------------------------------------------------------------------------------------------------------------------------------------------------------------------------------------------------------------------------------------------------------------------------------------------------------------------------------------------------------------------------------------------------------------------------------------------------------------------------------------------------------------------------------------------------------------------------------------------------------------------------------------------------------------------------------------------------------------------------------------------------------------------------------------------------|
| <p><b>Q30</b></p> | <p>Ipilimumab and nivolumab are both immune checkpoint inhibitors that have shown significant efficacy in the treatment of metastatic melanoma. Ipilimumab targets cytotoxic T-lymphocyte-associated antigen 4 (CTLA-4), while nivolumab targets programmed cell death protein 1 (PD-1).</p> <p>In clinical practice, the combination of ipilimumab and nivolumab has demonstrated superior efficacy compared to monotherapy with either drug alone in the treatment of metastatic melanoma. This combination therapy has become a standard treatment approach for many patients with metastatic melanoma.</p> <p>For patients who have previously received nivolumab as monotherapy and experienced disease progression, the addition of ipilimumab may be considered as a subsequent treatment option. The combination of ipilimumab and nivolumab has shown improved response rates and prolonged survival compared to ipilimumab alone in this setting.</p> <p>It's important to note that treatment decisions should be made in consultation with a healthcare professional who specializes in the treatment of melanoma. They will consider various factors, such as the patient's individual characteristics, prior treatments, overall health, and the specific characteristics of the disease, to determine the most appropriate treatment approach.</p> <p>Clinical trials and ongoing research continue to explore the optimal sequencing and combinations of immune checkpoint inhibitors, such as ipilimumab and nivolumab, in the treatment of metastatic melanoma. These studies aim to further refine treatment strategies and improve outcomes for patients.</p> | <p>In patients with metastatic melanoma who have previously received nivolumab, the use of ipilimumab, another immune checkpoint inhibitor, may be considered as a subsequent treatment option. Ipilimumab targets cytotoxic T-lymphocyte-associated antigen 4 (CTLA-4), while nivolumab targets programmed cell death protein 1 (PD-1).</p> <p>The combination of ipilimumab and nivolumab has shown improved efficacy compared to monotherapy with either drug alone in the treatment of metastatic melanoma. This combination therapy has become a standard treatment approach for many patients.</p> <p>For patients who have progressed on nivolumab monotherapy, adding ipilimumab to their treatment regimen may lead to improved response rates and prolonged survival. This combination has shown to have synergistic effects in enhancing the immune response against cancer cells.</p> <p>However, it is important to note that treatment decisions should be made in consultation with a healthcare professional who specializes in the treatment of melanoma. They will consider various factors, such as the patient's individual characteristics, prior treatments, overall health, and the specific characteristics of the disease, to determine the most appropriate treatment approach.</p> <p>The choice between ipilimumab and other treatment options will depend on multiple factors, including the patient's treatment history, disease status, and potential side effects associated with the therapies. Healthcare professionals will assess the patient's eligibility for ipilimumab and make recommendations based on the latest clinical guidelines and individual patient considerations.</p> | <p>In patients with metastatic melanoma who have previously received nivolumab, the use of ipilimumab, another immune checkpoint inhibitor, may be considered as a subsequent treatment option. Ipilimumab targets cytotoxic T-lymphocyte-associated antigen 4 (CTLA-4), while nivolumab targets programmed cell death protein 1 (PD-1).</p> <p>Clinical studies have shown that the combination of ipilimumab and nivolumab can lead to improved outcomes compared to monotherapy with either drug alone in the treatment of metastatic melanoma. This combination therapy has become a standard treatment approach for many patients.</p> <p>For patients who have progressed on nivolumab monotherapy, adding ipilimumab to their treatment regimen can be beneficial. The combination of ipilimumab and nivolumab has shown increased response rates and improved survival compared to ipilimumab alone in this setting.</p> <p>It is important to note that treatment decisions should be made in consultation with a healthcare professional who specializes in the treatment of melanoma. They will consider various factors, such as the patient's individual characteristics, prior treatments, overall health, and the specific characteristics of the disease, to determine the most appropriate treatment approach.</p> <p>The choice between ipilimumab and other treatment options will depend on multiple factors, including the patient's treatment history, disease status, and potential side effects associated with the therapies. Healthcare professionals will assess the patient's eligibility for ipilimumab and make recommendations based on the latest clinical guidelines and individual patient considerations.</p> |
|-------------------|-----------------------------------------------------------------------------------------------------------------------------------------------------------------------------------------------------------------------------------------------------------------------------------------------------------------------------------------------------------------------------------------------------------------------------------------------------------------------------------------------------------------------------------------------------------------------------------------------------------------------------------------------------------------------------------------------------------------------------------------------------------------------------------------------------------------------------------------------------------------------------------------------------------------------------------------------------------------------------------------------------------------------------------------------------------------------------------------------------------------------------------------------------------------------------------------------------------------------------------------------------------------------------------------------------------------------------------------------------------------------------------------------------------------------------------------------------------------------------------------------------------------------------------------------------------------------------------------------------------------------------------------------------------------------------------|----------------------------------------------------------------------------------------------------------------------------------------------------------------------------------------------------------------------------------------------------------------------------------------------------------------------------------------------------------------------------------------------------------------------------------------------------------------------------------------------------------------------------------------------------------------------------------------------------------------------------------------------------------------------------------------------------------------------------------------------------------------------------------------------------------------------------------------------------------------------------------------------------------------------------------------------------------------------------------------------------------------------------------------------------------------------------------------------------------------------------------------------------------------------------------------------------------------------------------------------------------------------------------------------------------------------------------------------------------------------------------------------------------------------------------------------------------------------------------------------------------------------------------------------------------------------------------------------------------------------------------------------------------------------------------------------------------------------------|--------------------------------------------------------------------------------------------------------------------------------------------------------------------------------------------------------------------------------------------------------------------------------------------------------------------------------------------------------------------------------------------------------------------------------------------------------------------------------------------------------------------------------------------------------------------------------------------------------------------------------------------------------------------------------------------------------------------------------------------------------------------------------------------------------------------------------------------------------------------------------------------------------------------------------------------------------------------------------------------------------------------------------------------------------------------------------------------------------------------------------------------------------------------------------------------------------------------------------------------------------------------------------------------------------------------------------------------------------------------------------------------------------------------------------------------------------------------------------------------------------------------------------------------------------------------------------------------------------------------------------------------------------------------------------------------------------------------------------------------------|

ChatGPT-3.5 - TOXICITIES

|            |                                                                                                                                                                                                                                                                                                                                                                                                                                                                                                                                                                                                                                                                                                                                                                                                                                                                                                                                                                                                                                                                                                                                                                                                                                                                                                                                                                                                                                                                                                                                                                                                                                                                                                                                                                                                                                                                                                                                                                                                                                                                                                                                                                                                  |                                                                                                                                                                                                                                                                                                                                                                                                                                                                                                                                                                                                                                                                                                                                                                                                                                                                                                                                                                                                                                                                                                                                                                                                                                                                                                                                                                                                                                                                                                                                                                                                                                                                                                                                                                                                                                                                                                                                                                                                                                                                                                                                                                                   |                                                                                                                                                                                                                                                                                                                                                                                                                                                                                                                                                                                                                                                                                                                                                                                                                                                                                                                                                                                                                                                                                                                                                                                                                                                                                                                                                                                                                                                                                                                                                                                                                                                                                                                                                                                                                                                                                                                                                                                      |
|------------|--------------------------------------------------------------------------------------------------------------------------------------------------------------------------------------------------------------------------------------------------------------------------------------------------------------------------------------------------------------------------------------------------------------------------------------------------------------------------------------------------------------------------------------------------------------------------------------------------------------------------------------------------------------------------------------------------------------------------------------------------------------------------------------------------------------------------------------------------------------------------------------------------------------------------------------------------------------------------------------------------------------------------------------------------------------------------------------------------------------------------------------------------------------------------------------------------------------------------------------------------------------------------------------------------------------------------------------------------------------------------------------------------------------------------------------------------------------------------------------------------------------------------------------------------------------------------------------------------------------------------------------------------------------------------------------------------------------------------------------------------------------------------------------------------------------------------------------------------------------------------------------------------------------------------------------------------------------------------------------------------------------------------------------------------------------------------------------------------------------------------------------------------------------------------------------------------|-----------------------------------------------------------------------------------------------------------------------------------------------------------------------------------------------------------------------------------------------------------------------------------------------------------------------------------------------------------------------------------------------------------------------------------------------------------------------------------------------------------------------------------------------------------------------------------------------------------------------------------------------------------------------------------------------------------------------------------------------------------------------------------------------------------------------------------------------------------------------------------------------------------------------------------------------------------------------------------------------------------------------------------------------------------------------------------------------------------------------------------------------------------------------------------------------------------------------------------------------------------------------------------------------------------------------------------------------------------------------------------------------------------------------------------------------------------------------------------------------------------------------------------------------------------------------------------------------------------------------------------------------------------------------------------------------------------------------------------------------------------------------------------------------------------------------------------------------------------------------------------------------------------------------------------------------------------------------------------------------------------------------------------------------------------------------------------------------------------------------------------------------------------------------------------|--------------------------------------------------------------------------------------------------------------------------------------------------------------------------------------------------------------------------------------------------------------------------------------------------------------------------------------------------------------------------------------------------------------------------------------------------------------------------------------------------------------------------------------------------------------------------------------------------------------------------------------------------------------------------------------------------------------------------------------------------------------------------------------------------------------------------------------------------------------------------------------------------------------------------------------------------------------------------------------------------------------------------------------------------------------------------------------------------------------------------------------------------------------------------------------------------------------------------------------------------------------------------------------------------------------------------------------------------------------------------------------------------------------------------------------------------------------------------------------------------------------------------------------------------------------------------------------------------------------------------------------------------------------------------------------------------------------------------------------------------------------------------------------------------------------------------------------------------------------------------------------------------------------------------------------------------------------------------------------|
| <p>Q31</p> | <p>I'm not a doctor, but I can try to provide some general information. When considering immunotherapy treatment for a patient with latent tuberculosis (TB), there are potential risks that need to be carefully evaluated by healthcare professionals. Immunotherapy can affect the immune system, which could have implications for someone with latent TB.</p> <p>Latent TB refers to a condition where a person has been infected with the bacteria that cause tuberculosis but does not have active symptoms of the disease. In some cases, latent TB can reactivate and become active TB, especially if the immune system is weakened.</p> <p>Immunotherapy treatments, such as immune checkpoint inhibitors or other targeted therapies, work by enhancing or modulating the immune system's response to fight cancer. However, this immune stimulation may also affect the control of latent infections like TB.</p> <p>Before starting immunotherapy, it is crucial to screen patients for latent TB infection. This is typically done through a combination of medical history, physical examination, and tests like the tuberculin skin test (TST) or interferon-gamma release assay (IGRA). If latent TB infection is suspected or confirmed, it's important to consult with infectious disease specialists and oncologists to assess the risks and benefits of immunotherapy.</p> <p>In some cases, prophylactic treatment for latent TB may be recommended before initiating immunotherapy. This could involve a course of medications to prevent the reactivation of TB during immunosuppressive treatments. However, the decision to proceed with immunotherapy and the appropriate management of latent TB would depend on various factors, including the individual patient's overall health, cancer type, and stage, as well as consultation with a healthcare team.</p> <p>If you have concerns about immunotherapy and latent TB, I strongly recommend consulting with a healthcare professional who can provide personalized advice based on your specific situation. They will be able to provide the most accurate information and guidance tailored to your needs.</p> | <p>Immunotherapy treatment in patients with latent tuberculosis (TB) poses certain risks and requires careful consideration by healthcare professionals. When the immune system is stimulated by immunotherapy, it can potentially disrupt the balance between controlling latent TB infection and preventing its reactivation.</p> <p>Patients with latent TB have been exposed to the bacteria that cause tuberculosis but do not currently exhibit active symptoms. The immune system usually keeps the infection under control, but if the immune response is weakened, such as with immunosuppressive therapies like immunotherapy, the latent infection may become active.</p> <p>Before starting immunotherapy, it is important to screen patients for latent TB infection. This typically involves a thorough evaluation of medical history, physical examination, and tests such as the tuberculin skin test (TST) or interferon-gamma release assay (IGRA). These tests help determine if a person has been exposed to TB bacteria and if the infection is in a latent state.</p> <p>If latent TB is suspected or confirmed, it is crucial to involve specialists in infectious diseases in the decision-making process. They can provide guidance on managing the risks associated with immunotherapy and latent TB. In some cases, prophylactic treatment for latent TB may be recommended before initiating immunotherapy. This preventive treatment involves using medications to reduce the risk of TB reactivation during immunosuppressive therapy.</p> <p>It's important to note that the decision to proceed with immunotherapy in patients with latent TB is highly individualized and depends on various factors, including the patient's overall health, cancer type and stage, and consultation with a multidisciplinary healthcare team.</p> <p>If you have latent TB and are considering immunotherapy, it is essential to consult with your healthcare provider. They will be able to assess your specific situation, weigh the potential risks and benefits, and provide personalized recommendations based on the latest guidelines and research.</p> | <p>I apologize for the confusion in my previous responses. As an AI language model, I can provide general information, but for specific medical advice, it's important to consult with a healthcare professional.</p> <p>Immunotherapy treatment in patients with latent tuberculosis (TB) can pose risks and requires careful consideration. Immunosuppressive treatments like immunotherapy can affect the immune system, which may impact the control of latent TB infection and increase the risk of its reactivation.</p> <p>The decision to proceed with immunotherapy in a patient with latent TB should be made on an individual basis, taking into account several factors including the patient's overall health, the severity of the TB infection, the type and stage of cancer, and input from infectious disease specialists and oncologists.</p> <p>It is crucial to screen patients for latent TB before starting immunotherapy. This typically involves evaluating the patient's medical history, performing a physical examination, and conducting tests such as the tuberculin skin test (TST) or interferon-gamma release assay (IGRA) to assess TB infection status. If latent TB is detected, the patient may require treatment for TB before initiating immunotherapy to reduce the risk of reactivation.</p> <p>The management of latent TB during immunotherapy is a complex issue that requires expertise from both infectious disease specialists and oncologists. These specialists will evaluate the risks and benefits, consider potential interactions between immunotherapy and TB treatment, and develop an appropriate plan tailored to the individual patient.</p> <p>If you have latent TB and are considering immunotherapy, I strongly recommend consulting with your healthcare provider or a team of specialists who can assess your specific situation and provide the most accurate advice based on the latest guidelines and research.</p> |
|------------|--------------------------------------------------------------------------------------------------------------------------------------------------------------------------------------------------------------------------------------------------------------------------------------------------------------------------------------------------------------------------------------------------------------------------------------------------------------------------------------------------------------------------------------------------------------------------------------------------------------------------------------------------------------------------------------------------------------------------------------------------------------------------------------------------------------------------------------------------------------------------------------------------------------------------------------------------------------------------------------------------------------------------------------------------------------------------------------------------------------------------------------------------------------------------------------------------------------------------------------------------------------------------------------------------------------------------------------------------------------------------------------------------------------------------------------------------------------------------------------------------------------------------------------------------------------------------------------------------------------------------------------------------------------------------------------------------------------------------------------------------------------------------------------------------------------------------------------------------------------------------------------------------------------------------------------------------------------------------------------------------------------------------------------------------------------------------------------------------------------------------------------------------------------------------------------------------|-----------------------------------------------------------------------------------------------------------------------------------------------------------------------------------------------------------------------------------------------------------------------------------------------------------------------------------------------------------------------------------------------------------------------------------------------------------------------------------------------------------------------------------------------------------------------------------------------------------------------------------------------------------------------------------------------------------------------------------------------------------------------------------------------------------------------------------------------------------------------------------------------------------------------------------------------------------------------------------------------------------------------------------------------------------------------------------------------------------------------------------------------------------------------------------------------------------------------------------------------------------------------------------------------------------------------------------------------------------------------------------------------------------------------------------------------------------------------------------------------------------------------------------------------------------------------------------------------------------------------------------------------------------------------------------------------------------------------------------------------------------------------------------------------------------------------------------------------------------------------------------------------------------------------------------------------------------------------------------------------------------------------------------------------------------------------------------------------------------------------------------------------------------------------------------|--------------------------------------------------------------------------------------------------------------------------------------------------------------------------------------------------------------------------------------------------------------------------------------------------------------------------------------------------------------------------------------------------------------------------------------------------------------------------------------------------------------------------------------------------------------------------------------------------------------------------------------------------------------------------------------------------------------------------------------------------------------------------------------------------------------------------------------------------------------------------------------------------------------------------------------------------------------------------------------------------------------------------------------------------------------------------------------------------------------------------------------------------------------------------------------------------------------------------------------------------------------------------------------------------------------------------------------------------------------------------------------------------------------------------------------------------------------------------------------------------------------------------------------------------------------------------------------------------------------------------------------------------------------------------------------------------------------------------------------------------------------------------------------------------------------------------------------------------------------------------------------------------------------------------------------------------------------------------------------|



|                   |                                                                                                                                                                                                                                                                                                                                                                                                                                                                                                                                                                                                                                                                                                                                                                                                                                                                                                                                                                                                                                                                                                                                                                                                                                                                                                                                                                                                                                                                                                                                                                                                                                                                                                                                                                                                                                                                                                                                                                                                                                                                                                                                                                                                                                                                                                                                                                                                     |                                                                                                                                                                                                                                                                                                                                                                                                                                                                                                                                                                                                                                                                                                                                                                                                                                                                                                                                                                                                                                                                                                                                                                                                                                                                                                                                                                                                                                                                                                                                                                                                                                                                                                                                                                                                                                                                                                                                                                                                                                                                                                                                                                                                                                                                                                                                                                                                                                                                                                                                                                                                                                                                  |                                                                                                                                                                                                                                                                                                                                                                                                                                                                                                                                                                                                                                                                                                                                                                                                                                                                                                                                                                                                                                                                                                                                                                                                                                                                                                                                                                                                                                                                                                                                                                                                                                                                                                                                                                                                                                                                                                                                                                                                                                                                                                                                                                                                                                                                                                                                                                                                                                                                                                                                                                                                                      |
|-------------------|-----------------------------------------------------------------------------------------------------------------------------------------------------------------------------------------------------------------------------------------------------------------------------------------------------------------------------------------------------------------------------------------------------------------------------------------------------------------------------------------------------------------------------------------------------------------------------------------------------------------------------------------------------------------------------------------------------------------------------------------------------------------------------------------------------------------------------------------------------------------------------------------------------------------------------------------------------------------------------------------------------------------------------------------------------------------------------------------------------------------------------------------------------------------------------------------------------------------------------------------------------------------------------------------------------------------------------------------------------------------------------------------------------------------------------------------------------------------------------------------------------------------------------------------------------------------------------------------------------------------------------------------------------------------------------------------------------------------------------------------------------------------------------------------------------------------------------------------------------------------------------------------------------------------------------------------------------------------------------------------------------------------------------------------------------------------------------------------------------------------------------------------------------------------------------------------------------------------------------------------------------------------------------------------------------------------------------------------------------------------------------------------------------|------------------------------------------------------------------------------------------------------------------------------------------------------------------------------------------------------------------------------------------------------------------------------------------------------------------------------------------------------------------------------------------------------------------------------------------------------------------------------------------------------------------------------------------------------------------------------------------------------------------------------------------------------------------------------------------------------------------------------------------------------------------------------------------------------------------------------------------------------------------------------------------------------------------------------------------------------------------------------------------------------------------------------------------------------------------------------------------------------------------------------------------------------------------------------------------------------------------------------------------------------------------------------------------------------------------------------------------------------------------------------------------------------------------------------------------------------------------------------------------------------------------------------------------------------------------------------------------------------------------------------------------------------------------------------------------------------------------------------------------------------------------------------------------------------------------------------------------------------------------------------------------------------------------------------------------------------------------------------------------------------------------------------------------------------------------------------------------------------------------------------------------------------------------------------------------------------------------------------------------------------------------------------------------------------------------------------------------------------------------------------------------------------------------------------------------------------------------------------------------------------------------------------------------------------------------------------------------------------------------------------------------------------------------|----------------------------------------------------------------------------------------------------------------------------------------------------------------------------------------------------------------------------------------------------------------------------------------------------------------------------------------------------------------------------------------------------------------------------------------------------------------------------------------------------------------------------------------------------------------------------------------------------------------------------------------------------------------------------------------------------------------------------------------------------------------------------------------------------------------------------------------------------------------------------------------------------------------------------------------------------------------------------------------------------------------------------------------------------------------------------------------------------------------------------------------------------------------------------------------------------------------------------------------------------------------------------------------------------------------------------------------------------------------------------------------------------------------------------------------------------------------------------------------------------------------------------------------------------------------------------------------------------------------------------------------------------------------------------------------------------------------------------------------------------------------------------------------------------------------------------------------------------------------------------------------------------------------------------------------------------------------------------------------------------------------------------------------------------------------------------------------------------------------------------------------------------------------------------------------------------------------------------------------------------------------------------------------------------------------------------------------------------------------------------------------------------------------------------------------------------------------------------------------------------------------------------------------------------------------------------------------------------------------------|
| <p><b>Q32</b></p> | <p>Immunotherapy in patients with well-controlled HIV who are receiving antiretroviral therapy (ART) is an area of ongoing research and clinical evaluation. While the data is limited, current evidence suggests that immunotherapy can be used safely in this patient population, but careful monitoring and individualized treatment decisions are essential.</p> <p>Patients with well-controlled HIV on ART generally have restored immune function, which may allow them to tolerate immunotherapy. However, it's important to note that each case should be evaluated on an individual basis, taking into account factors such as the patient's overall health, HIV control, CD4+ T-cell count, and viral load.</p> <p>In the context of immunotherapy, there are certain considerations:</p> <ol style="list-style-type: none"> <li>1. Interaction with ART: Some immunotherapy drugs may interact with certain antiretroviral medications. Therefore, close collaboration between infectious disease specialists and oncologists is crucial to ensure there are no significant drug interactions that could compromise HIV control or cancer treatment.</li> <li>2. Immune-related adverse events (irAEs): Immunotherapy can lead to immune-related adverse events, which occur when the immune system becomes overactive and attacks healthy tissues. Monitoring for and managing these irAEs may require careful coordination between the HIV and oncology teams.</li> <li>3. Disease progression: The impact of immunotherapy on HIV viral load and CD4+ T-cell count in patients with well-controlled HIV is not yet fully understood. Close monitoring of HIV markers during immunotherapy is necessary to ensure that HIV control remains stable.</li> </ol> <p>As with any medical decision, it is crucial to involve a multidisciplinary healthcare team, including oncologists, infectious disease specialists, and HIV specialists. They can assess the individual patient's situation, weigh the potential risks and benefits, and make treatment recommendations based on the latest guidelines, research, and clinical experience.</p> <p>If you are a patient with well-controlled HIV considering immunotherapy, I strongly advise consulting with your healthcare provider to discuss your specific circumstances, potential risks, and appropriate treatment options.</p> | <p>The use of immunotherapy in patients with well-controlled HIV who are receiving antiretroviral therapy (ART) is an area of active research, and the available data is still limited. However, emerging evidence suggests that immunotherapy can be considered in select patients with well-controlled HIV, but individualized assessment and close monitoring are essential.</p> <p>Patients with well-controlled HIV on ART often have restored immune function, which may increase their ability to tolerate immunotherapy. Nonetheless, several factors should be considered when evaluating the safety and appropriateness of immunotherapy in this population:</p> <ol style="list-style-type: none"> <li>1. Individual patient assessment: Each patient's case should be evaluated individually, considering factors such as their overall health, HIV control (e.g., viral load, CD4+ T-cell count), and the specific type and stage of cancer being treated.</li> <li>2. Potential drug interactions: Some immunotherapy drugs may interact with certain antiretroviral medications used in HIV treatment. Close collaboration between infectious disease specialists and oncologists is crucial to identify and manage any potential drug interactions and ensure the continued effectiveness of HIV control and cancer treatment.</li> <li>3. Immune-related adverse events (irAEs): Immunotherapy can lead to immune-related adverse events, where the immune system becomes overactive and attacks healthy tissues. Monitoring for and managing these irAEs may require careful coordination between the HIV and oncology teams.</li> <li>4. Disease progression: The impact of immunotherapy on HIV control, viral load, and CD4+ T-cell count in patients with well-controlled HIV is not yet fully understood. Close monitoring of HIV markers during immunotherapy is necessary to ensure that HIV control remains stable.</li> </ol> <p>It is crucial to involve a multidisciplinary healthcare team, including oncologists, infectious disease specialists, and HIV specialists, in the decision-making process. They can evaluate the individual patient's specific circumstances, consider the potential risks and benefits, and provide informed recommendations based on the most up-to-date guidelines and research.</p> <p>If you are a patient with well-controlled HIV considering immunotherapy, I strongly recommend consulting with your healthcare provider to discuss your unique situation and to obtain personalized advice regarding the potential risks, benefits, and appropriate treatment options available to you.</p> | <p>The safety of immunotherapy in patients with well-controlled HIV who are receiving antiretroviral therapy (ART) is an area of active research and evolving clinical practice. While data is limited, current evidence suggests that immunotherapy can be used safely in select patients with well-controlled HIV.</p> <p>Patients with well-controlled HIV on ART often have restored immune function, which may enhance their ability to tolerate immunotherapy. However, it is important to consider several factors when assessing the safety and appropriateness of immunotherapy in this population:</p> <ol style="list-style-type: none"> <li>1. Individual patient assessment: Each patient's case should be evaluated on an individual basis, considering factors such as their overall health, HIV control (e.g., viral load, CD4+ T-cell count), and the specific type and stage of cancer being treated.</li> <li>2. Drug interactions: Some immunotherapy drugs may interact with certain antiretroviral medications used in HIV treatment. Collaborative efforts between infectious disease specialists, oncologists, and HIV specialists are crucial to assess potential drug interactions and ensure the continued effectiveness of both HIV control and cancer treatment.</li> <li>3. Immune-related adverse events (irAEs): Immunotherapy can lead to immune-related adverse events, which are caused by the immune system becoming overactive and attacking healthy tissues. Close monitoring and management of irAEs may require coordination between the HIV and oncology teams.</li> <li>4. Disease progression: The impact of immunotherapy on HIV control, viral load, and CD4+ T-cell count in patients with well-controlled HIV is not yet fully understood. Close monitoring of HIV markers during immunotherapy is necessary to ensure that HIV control remains stable.</li> </ol> <p>It is crucial to involve a multidisciplinary healthcare team, including oncologists, infectious disease specialists, and HIV specialists, in the decision-making process. They can assess the individual patient's specific circumstances, consider potential risks and benefits, and provide personalized recommendations based on the most up-to-date guidelines and research.</p> <p>If you are a patient with well-controlled HIV considering immunotherapy, I strongly advise consulting with your healthcare provider to discuss your unique situation and to obtain personalized advice regarding the potential risks, benefits, and appropriate treatment options available to you.</p> |
|-------------------|-----------------------------------------------------------------------------------------------------------------------------------------------------------------------------------------------------------------------------------------------------------------------------------------------------------------------------------------------------------------------------------------------------------------------------------------------------------------------------------------------------------------------------------------------------------------------------------------------------------------------------------------------------------------------------------------------------------------------------------------------------------------------------------------------------------------------------------------------------------------------------------------------------------------------------------------------------------------------------------------------------------------------------------------------------------------------------------------------------------------------------------------------------------------------------------------------------------------------------------------------------------------------------------------------------------------------------------------------------------------------------------------------------------------------------------------------------------------------------------------------------------------------------------------------------------------------------------------------------------------------------------------------------------------------------------------------------------------------------------------------------------------------------------------------------------------------------------------------------------------------------------------------------------------------------------------------------------------------------------------------------------------------------------------------------------------------------------------------------------------------------------------------------------------------------------------------------------------------------------------------------------------------------------------------------------------------------------------------------------------------------------------------------|------------------------------------------------------------------------------------------------------------------------------------------------------------------------------------------------------------------------------------------------------------------------------------------------------------------------------------------------------------------------------------------------------------------------------------------------------------------------------------------------------------------------------------------------------------------------------------------------------------------------------------------------------------------------------------------------------------------------------------------------------------------------------------------------------------------------------------------------------------------------------------------------------------------------------------------------------------------------------------------------------------------------------------------------------------------------------------------------------------------------------------------------------------------------------------------------------------------------------------------------------------------------------------------------------------------------------------------------------------------------------------------------------------------------------------------------------------------------------------------------------------------------------------------------------------------------------------------------------------------------------------------------------------------------------------------------------------------------------------------------------------------------------------------------------------------------------------------------------------------------------------------------------------------------------------------------------------------------------------------------------------------------------------------------------------------------------------------------------------------------------------------------------------------------------------------------------------------------------------------------------------------------------------------------------------------------------------------------------------------------------------------------------------------------------------------------------------------------------------------------------------------------------------------------------------------------------------------------------------------------------------------------------------------|----------------------------------------------------------------------------------------------------------------------------------------------------------------------------------------------------------------------------------------------------------------------------------------------------------------------------------------------------------------------------------------------------------------------------------------------------------------------------------------------------------------------------------------------------------------------------------------------------------------------------------------------------------------------------------------------------------------------------------------------------------------------------------------------------------------------------------------------------------------------------------------------------------------------------------------------------------------------------------------------------------------------------------------------------------------------------------------------------------------------------------------------------------------------------------------------------------------------------------------------------------------------------------------------------------------------------------------------------------------------------------------------------------------------------------------------------------------------------------------------------------------------------------------------------------------------------------------------------------------------------------------------------------------------------------------------------------------------------------------------------------------------------------------------------------------------------------------------------------------------------------------------------------------------------------------------------------------------------------------------------------------------------------------------------------------------------------------------------------------------------------------------------------------------------------------------------------------------------------------------------------------------------------------------------------------------------------------------------------------------------------------------------------------------------------------------------------------------------------------------------------------------------------------------------------------------------------------------------------------------|

|                   |                                                                                                                                                                                                                                                                                                                                                                                                                                                                                                                                                                                                                                                                                                                                                                                                                                                                                                                                                                                                                                                                                                                                                                                                                                                                                                                                                                                                                                                                                                                                                                                                                                                                                                                                                                                                                                                                                                                                                                                                                                 |                                                                                                                                                                                                                                                                                                                                                                                                                                                                                                                                                                                                                                                                                                                                                                                                                                                                                                                                                                                                                                                                                                                                                                                                                                                                                                                                                                                                                                                                                                                                                                                                                                                                                                                                                                                                                                            |                                                                                                                                                                                                                                                                                                                                                                                                                                                                                                                                                                                                                                                                                                                                                                                                                                                                                                                                                                                                                                                                                                                                                                                                                                                                                                                                                                                                                                                                                                                                                                                                                                                                                                                                                                                                                                                                                                                                                                                                                                                                            |
|-------------------|---------------------------------------------------------------------------------------------------------------------------------------------------------------------------------------------------------------------------------------------------------------------------------------------------------------------------------------------------------------------------------------------------------------------------------------------------------------------------------------------------------------------------------------------------------------------------------------------------------------------------------------------------------------------------------------------------------------------------------------------------------------------------------------------------------------------------------------------------------------------------------------------------------------------------------------------------------------------------------------------------------------------------------------------------------------------------------------------------------------------------------------------------------------------------------------------------------------------------------------------------------------------------------------------------------------------------------------------------------------------------------------------------------------------------------------------------------------------------------------------------------------------------------------------------------------------------------------------------------------------------------------------------------------------------------------------------------------------------------------------------------------------------------------------------------------------------------------------------------------------------------------------------------------------------------------------------------------------------------------------------------------------------------|--------------------------------------------------------------------------------------------------------------------------------------------------------------------------------------------------------------------------------------------------------------------------------------------------------------------------------------------------------------------------------------------------------------------------------------------------------------------------------------------------------------------------------------------------------------------------------------------------------------------------------------------------------------------------------------------------------------------------------------------------------------------------------------------------------------------------------------------------------------------------------------------------------------------------------------------------------------------------------------------------------------------------------------------------------------------------------------------------------------------------------------------------------------------------------------------------------------------------------------------------------------------------------------------------------------------------------------------------------------------------------------------------------------------------------------------------------------------------------------------------------------------------------------------------------------------------------------------------------------------------------------------------------------------------------------------------------------------------------------------------------------------------------------------------------------------------------------------|----------------------------------------------------------------------------------------------------------------------------------------------------------------------------------------------------------------------------------------------------------------------------------------------------------------------------------------------------------------------------------------------------------------------------------------------------------------------------------------------------------------------------------------------------------------------------------------------------------------------------------------------------------------------------------------------------------------------------------------------------------------------------------------------------------------------------------------------------------------------------------------------------------------------------------------------------------------------------------------------------------------------------------------------------------------------------------------------------------------------------------------------------------------------------------------------------------------------------------------------------------------------------------------------------------------------------------------------------------------------------------------------------------------------------------------------------------------------------------------------------------------------------------------------------------------------------------------------------------------------------------------------------------------------------------------------------------------------------------------------------------------------------------------------------------------------------------------------------------------------------------------------------------------------------------------------------------------------------------------------------------------------------------------------------------------------------|
| <p><b>Q33</b></p> | <p>Based on the symptoms and clinical findings described, the likely diagnosis in this case is hyperthyroidism, specifically Graves' disease. Graves' disease is an autoimmune disorder that affects the thyroid gland, leading to excessive production of thyroid hormones (hyperthyroidism).</p> <p>The symptoms and signs observed in the patient are consistent with hyperthyroidism:</p> <ol style="list-style-type: none"> <li>1. Weight loss: Hyperthyroidism can cause unintentional weight loss despite increased appetite.</li> <li>2. Tremulousness and fine tremor: Hyperthyroidism can result in nervousness, restlessness, and tremors.</li> <li>3. Anxiety: Excessive thyroid hormone levels can contribute to feelings of anxiety and irritability.</li> <li>4. Diarrhea: Increased bowel movements and diarrhea can occur in hyperthyroidism.</li> <li>5. Feeling warm all the time: Elevated metabolism due to excess thyroid hormones can make patients feel excessively warm or have an increased sensitivity to heat.</li> <li>6. Proptosis (bulging eyes): Graves' disease is commonly associated with a condition called thyroid-associated orbitopathy, which can cause bulging eyes (proptosis) and eye-related symptoms.</li> </ol> <p>The use of Nivolumab, an immunotherapy drug, in this case may have triggered an immune response that resulted in the development of autoimmune hyperthyroidism, such as Graves' disease. Immune checkpoint inhibitors like Nivolumab can occasionally lead to immune-related adverse events, including endocrine disorders like thyroid dysfunction.</p> <p>It is important for the patient to receive a comprehensive evaluation, including thyroid function tests (such as TSH, free T4, and possibly T3 levels) and further assessment by an endocrinologist to confirm the diagnosis and initiate appropriate management, which may involve anti-thyroid medications, beta-blockers to alleviate symptoms, or other interventions as deemed necessary.</p> | <p>The symptoms and clinical findings described in the patient, including weight loss, tremulousness, anxiety, diarrhea, feeling warm all the time, fine tremor, and proptosed eyes, are highly indicative of hyperthyroidism associated with Graves' disease.</p> <p>Graves' disease is an autoimmune disorder that causes overactivity of the thyroid gland, resulting in excessive production of thyroid hormones. It is characterized by hyperthyroidism and is often associated with specific symptoms and signs, such as weight loss, tremors, anxiety, increased bowel movements, sensitivity to heat, fine tremor, and proptosis (bulging eyes). These symptoms occur due to the elevated levels of thyroid hormones circulating in the body.</p> <p>The use of Nivolumab, an immune checkpoint inhibitor, can rarely lead to the development of immune-related adverse events, including endocrine disorders like autoimmune thyroiditis and subsequent Graves' disease. These immunotherapy-related adverse effects are important to consider in patients receiving immune checkpoint inhibitors.</p> <p>It is crucial for the patient to be evaluated by an endocrinologist for confirmation of the diagnosis through thyroid function tests, including TSH (thyroid-stimulating hormone), free T4 (thyroxine), and possibly T3 (triiodothyronine) levels. The endocrinologist will determine the appropriate management, which may involve anti-thyroid medications, beta-blockers for symptom control, or other interventions tailored to the individual patient's condition.</p> <p>Prompt medical attention and appropriate treatment are important in managing Graves' disease to alleviate symptoms, normalize thyroid hormone levels, and prevent potential complications associated with untreated hyperthyroidism.</p> | <p>The likely diagnosis based on the described symptoms and clinical findings is Graves' disease with thyroid-associated orbitopathy. Graves' disease is an autoimmune disorder that affects the thyroid gland, leading to the overproduction of thyroid hormones (hyperthyroidism). The symptoms and clinical features observed in the patient are consistent with this condition:</p> <ol style="list-style-type: none"> <li>1. Weight loss: Hyperthyroidism can cause unintentional weight loss despite increased appetite.</li> <li>2. Tremulousness and fine tremor: Hyperthyroidism can result in nervousness, restlessness, and fine tremors.</li> <li>3. Anxiety: Excessive thyroid hormone levels can contribute to feelings of anxiety.</li> <li>4. Diarrhea: Increased bowel movements and diarrhea can occur in hyperthyroidism.</li> <li>5. Feeling warm all the time: Elevated metabolism due to excess thyroid hormones can make patients feel excessively warm or have an increased sensitivity to heat.</li> <li>6. Proptosis (bulging eyes): Graves' disease is commonly associated with thyroid-associated orbitopathy, which can cause bulging eyes (proptosis) and eye-related symptoms.</li> </ol> <p>Nivolumab, an immune checkpoint inhibitor, may trigger an immune response that leads to the development or exacerbation of autoimmune conditions such as Graves' disease.</p> <p>To confirm the diagnosis, the patient should undergo further evaluation, including thyroid function tests (TSH, free T4, and possibly T3 levels), as well as an assessment by an endocrinologist and potentially an ophthalmologist to evaluate the severity of thyroid-associated orbitopathy. Management may involve anti-thyroid medications, beta-blockers for symptom control, and specialized care for the eye symptoms.</p> <p>It is essential for the patient to consult with their healthcare provider to receive a proper evaluation, confirm the diagnosis, and receive appropriate treatment for Graves' disease and its associated symptoms.</p> |
|-------------------|---------------------------------------------------------------------------------------------------------------------------------------------------------------------------------------------------------------------------------------------------------------------------------------------------------------------------------------------------------------------------------------------------------------------------------------------------------------------------------------------------------------------------------------------------------------------------------------------------------------------------------------------------------------------------------------------------------------------------------------------------------------------------------------------------------------------------------------------------------------------------------------------------------------------------------------------------------------------------------------------------------------------------------------------------------------------------------------------------------------------------------------------------------------------------------------------------------------------------------------------------------------------------------------------------------------------------------------------------------------------------------------------------------------------------------------------------------------------------------------------------------------------------------------------------------------------------------------------------------------------------------------------------------------------------------------------------------------------------------------------------------------------------------------------------------------------------------------------------------------------------------------------------------------------------------------------------------------------------------------------------------------------------------|--------------------------------------------------------------------------------------------------------------------------------------------------------------------------------------------------------------------------------------------------------------------------------------------------------------------------------------------------------------------------------------------------------------------------------------------------------------------------------------------------------------------------------------------------------------------------------------------------------------------------------------------------------------------------------------------------------------------------------------------------------------------------------------------------------------------------------------------------------------------------------------------------------------------------------------------------------------------------------------------------------------------------------------------------------------------------------------------------------------------------------------------------------------------------------------------------------------------------------------------------------------------------------------------------------------------------------------------------------------------------------------------------------------------------------------------------------------------------------------------------------------------------------------------------------------------------------------------------------------------------------------------------------------------------------------------------------------------------------------------------------------------------------------------------------------------------------------------|----------------------------------------------------------------------------------------------------------------------------------------------------------------------------------------------------------------------------------------------------------------------------------------------------------------------------------------------------------------------------------------------------------------------------------------------------------------------------------------------------------------------------------------------------------------------------------------------------------------------------------------------------------------------------------------------------------------------------------------------------------------------------------------------------------------------------------------------------------------------------------------------------------------------------------------------------------------------------------------------------------------------------------------------------------------------------------------------------------------------------------------------------------------------------------------------------------------------------------------------------------------------------------------------------------------------------------------------------------------------------------------------------------------------------------------------------------------------------------------------------------------------------------------------------------------------------------------------------------------------------------------------------------------------------------------------------------------------------------------------------------------------------------------------------------------------------------------------------------------------------------------------------------------------------------------------------------------------------------------------------------------------------------------------------------------------------|

|            |                                                                                                                                                                                                                                                                                                                                                                                                                                                                                                                                                                                                                                                                                                                                                                                                                                                                                                                                                                                                                                                                                                                                                                                                                                                                                                                                                                                                                                                                                                                                                                                                                                                                                                                                                                                                                                                                                                                                                                                                                                                                                                                                                                                                                                                                                                                                                                                                                                                   |                                                                                                                                                                                                                                                                                                                                                                                                                                                                                                                                                                                                                                                                                                                                                                                                                                                                                                                                                                                                                                                                                                                                                                                                                                                                                                                                                                                                                                                                                                                                                                                                                                                                                                                                                                                                                                                                                                                                                                                                                                                                                                                                              |                                                                                                                                                                                                                                                                                                                                                                                                                                                                                                                                                                                                                                                                                                                                                                                                                                                                                                                                                                                                                                                                                                                                                                                                                                                                                                                                                                                                                                                                                                                                                                                                                                                                                                                                                                                                                                                                                                                                                                                                                                                                                                                                           |
|------------|---------------------------------------------------------------------------------------------------------------------------------------------------------------------------------------------------------------------------------------------------------------------------------------------------------------------------------------------------------------------------------------------------------------------------------------------------------------------------------------------------------------------------------------------------------------------------------------------------------------------------------------------------------------------------------------------------------------------------------------------------------------------------------------------------------------------------------------------------------------------------------------------------------------------------------------------------------------------------------------------------------------------------------------------------------------------------------------------------------------------------------------------------------------------------------------------------------------------------------------------------------------------------------------------------------------------------------------------------------------------------------------------------------------------------------------------------------------------------------------------------------------------------------------------------------------------------------------------------------------------------------------------------------------------------------------------------------------------------------------------------------------------------------------------------------------------------------------------------------------------------------------------------------------------------------------------------------------------------------------------------------------------------------------------------------------------------------------------------------------------------------------------------------------------------------------------------------------------------------------------------------------------------------------------------------------------------------------------------------------------------------------------------------------------------------------------------|----------------------------------------------------------------------------------------------------------------------------------------------------------------------------------------------------------------------------------------------------------------------------------------------------------------------------------------------------------------------------------------------------------------------------------------------------------------------------------------------------------------------------------------------------------------------------------------------------------------------------------------------------------------------------------------------------------------------------------------------------------------------------------------------------------------------------------------------------------------------------------------------------------------------------------------------------------------------------------------------------------------------------------------------------------------------------------------------------------------------------------------------------------------------------------------------------------------------------------------------------------------------------------------------------------------------------------------------------------------------------------------------------------------------------------------------------------------------------------------------------------------------------------------------------------------------------------------------------------------------------------------------------------------------------------------------------------------------------------------------------------------------------------------------------------------------------------------------------------------------------------------------------------------------------------------------------------------------------------------------------------------------------------------------------------------------------------------------------------------------------------------------|-------------------------------------------------------------------------------------------------------------------------------------------------------------------------------------------------------------------------------------------------------------------------------------------------------------------------------------------------------------------------------------------------------------------------------------------------------------------------------------------------------------------------------------------------------------------------------------------------------------------------------------------------------------------------------------------------------------------------------------------------------------------------------------------------------------------------------------------------------------------------------------------------------------------------------------------------------------------------------------------------------------------------------------------------------------------------------------------------------------------------------------------------------------------------------------------------------------------------------------------------------------------------------------------------------------------------------------------------------------------------------------------------------------------------------------------------------------------------------------------------------------------------------------------------------------------------------------------------------------------------------------------------------------------------------------------------------------------------------------------------------------------------------------------------------------------------------------------------------------------------------------------------------------------------------------------------------------------------------------------------------------------------------------------------------------------------------------------------------------------------------------------|
| <p>Q34</p> | <p>The management of colitis induced by Pembrolizumab or any immune checkpoint inhibitor requires prompt medical attention and should be guided by a healthcare professional experienced in managing immune-related adverse events. The specific treatment approach may vary depending on the severity of symptoms and individual patient factors. However, a common first-line treatment for moderate to severe immune-related colitis is systemic corticosteroids.</p> <p>In the scenario you presented, where the patient is experiencing significant symptoms such as eight bowel motions per day, dehydration, and fecal incontinence, urgent medical intervention is necessary. The general approach to managing immune-related colitis may include:</p> <ol style="list-style-type: none"> <li>1. Assessment and supportive care: The patient's condition should be evaluated, including hydration status and overall clinical stability. Supportive care measures, such as intravenous fluids to manage dehydration, may be initiated.</li> <li>2. Systemic corticosteroids: High-dose systemic corticosteroids, such as prednisone or methylprednisolone, are often considered the first-line treatment for immune-related colitis. The dosage and duration of corticosteroid therapy will depend on the severity of symptoms and the patient's individual characteristics. Rapid initiation of corticosteroid therapy is important to control inflammation and alleviate symptoms.</li> <li>3. Close monitoring and follow-up: Regular monitoring of symptoms, laboratory parameters, and clinical response is essential to assess the effectiveness of treatment and adjust management as needed. Follow-up evaluations with healthcare professionals experienced in managing immune-related adverse events should be scheduled.</li> </ol> <p>It is crucial to involve the patient's oncologist and a healthcare team experienced in managing immune-related adverse events to ensure appropriate and timely treatment. They will consider the patient's overall condition, disease status, and specific treatment requirements to tailor the management strategy accordingly.</p> <p>Please note that this response provides general information and should not replace individualized medical advice. Patients should consult their healthcare provider for guidance and treatment recommendations specific to their situation.</p> | <p>The management of Pembrolizumab-induced colitis requires prompt medical attention and should be guided by a healthcare professional experienced in managing immune-related adverse events. In cases where colitis presents with severe symptoms such as eight bowel motions per day, dehydration, and fecal incontinence, immediate intervention is necessary.</p> <p>The first-line treatment for severe immune-related colitis associated with Pembrolizumab or other immune checkpoint inhibitors typically involves high-dose systemic corticosteroids. The specific dosage and duration of corticosteroid therapy may vary depending on the severity of symptoms and the individual patient's factors. Rapid initiation of corticosteroid treatment is crucial to control inflammation and alleviate symptoms.</p> <p>In addition to corticosteroids, supportive care measures should also be implemented, which may include:</p> <ol style="list-style-type: none"> <li>1. Intravenous fluid administration: Dehydration resulting from increased bowel movements and fluid loss needs to be addressed promptly. Intravenous fluids may be required to restore hydration.</li> <li>2. Electrolyte management: Imbalances in electrolytes, such as potassium or sodium, may occur due to excessive bowel movements. These imbalances may need to be corrected.</li> <li>3. Close monitoring: Continuous monitoring of the patient's symptoms, vital signs, and laboratory parameters is important to assess the response to treatment and make any necessary adjustments.</li> </ol> <p>It is crucial to involve the patient's oncologist and a healthcare team experienced in managing immune-related adverse events. They will consider the patient's overall condition, disease status, and specific treatment requirements to tailor the management strategy accordingly.</p> <p>Please note that this response provides general information and should not replace individualized medical advice. Patients should consult their healthcare provider for guidance and treatment recommendations specific to their situation.</p> | <p>The first-line treatment for Pembrolizumab-induced colitis presenting with severe symptoms such as eight bowel motions per day, dehydration, and fecal incontinence is immediate and aggressive management with high-dose systemic corticosteroids. This treatment approach aims to control the inflammatory response and alleviate symptoms.</p> <p>Typically, intravenous methylprednisolone or prednisone is administered as the initial corticosteroid therapy. The specific dosage and duration will depend on the severity of symptoms and the patient's individual characteristics. Rapid initiation of corticosteroid treatment is crucial to address the inflammation and mitigate the symptoms.</p> <p>In addition to corticosteroids, supportive care measures should also be implemented, including:</p> <ol style="list-style-type: none"> <li>1. Intravenous fluids: Dehydration resulting from increased bowel movements and fluid loss needs to be corrected. Intravenous fluids may be administered to restore hydration.</li> <li>2. Electrolyte management: Imbalances in electrolytes, such as potassium or sodium, may occur due to the excessive bowel movements. These imbalances should be assessed and appropriately managed.</li> <li>3. Close monitoring: Regular monitoring of symptoms, vital signs, laboratory parameters (including electrolytes, renal function, and inflammatory markers), and hydration status is essential. This allows healthcare professionals to assess the response to treatment, adjust management if necessary, and ensure patient safety.</li> </ol> <p>It is crucial to involve the patient's oncologist and a healthcare team experienced in managing immune-related adverse events. They will consider the patient's overall condition, disease status, and specific treatment requirements to provide appropriate and timely care.</p> <p>This response provides general information and should not replace individualized medical advice. Patients should consult their healthcare provider for guidance and treatment recommendations specific to their situation.</p> |
|------------|---------------------------------------------------------------------------------------------------------------------------------------------------------------------------------------------------------------------------------------------------------------------------------------------------------------------------------------------------------------------------------------------------------------------------------------------------------------------------------------------------------------------------------------------------------------------------------------------------------------------------------------------------------------------------------------------------------------------------------------------------------------------------------------------------------------------------------------------------------------------------------------------------------------------------------------------------------------------------------------------------------------------------------------------------------------------------------------------------------------------------------------------------------------------------------------------------------------------------------------------------------------------------------------------------------------------------------------------------------------------------------------------------------------------------------------------------------------------------------------------------------------------------------------------------------------------------------------------------------------------------------------------------------------------------------------------------------------------------------------------------------------------------------------------------------------------------------------------------------------------------------------------------------------------------------------------------------------------------------------------------------------------------------------------------------------------------------------------------------------------------------------------------------------------------------------------------------------------------------------------------------------------------------------------------------------------------------------------------------------------------------------------------------------------------------------------------|----------------------------------------------------------------------------------------------------------------------------------------------------------------------------------------------------------------------------------------------------------------------------------------------------------------------------------------------------------------------------------------------------------------------------------------------------------------------------------------------------------------------------------------------------------------------------------------------------------------------------------------------------------------------------------------------------------------------------------------------------------------------------------------------------------------------------------------------------------------------------------------------------------------------------------------------------------------------------------------------------------------------------------------------------------------------------------------------------------------------------------------------------------------------------------------------------------------------------------------------------------------------------------------------------------------------------------------------------------------------------------------------------------------------------------------------------------------------------------------------------------------------------------------------------------------------------------------------------------------------------------------------------------------------------------------------------------------------------------------------------------------------------------------------------------------------------------------------------------------------------------------------------------------------------------------------------------------------------------------------------------------------------------------------------------------------------------------------------------------------------------------------|-------------------------------------------------------------------------------------------------------------------------------------------------------------------------------------------------------------------------------------------------------------------------------------------------------------------------------------------------------------------------------------------------------------------------------------------------------------------------------------------------------------------------------------------------------------------------------------------------------------------------------------------------------------------------------------------------------------------------------------------------------------------------------------------------------------------------------------------------------------------------------------------------------------------------------------------------------------------------------------------------------------------------------------------------------------------------------------------------------------------------------------------------------------------------------------------------------------------------------------------------------------------------------------------------------------------------------------------------------------------------------------------------------------------------------------------------------------------------------------------------------------------------------------------------------------------------------------------------------------------------------------------------------------------------------------------------------------------------------------------------------------------------------------------------------------------------------------------------------------------------------------------------------------------------------------------------------------------------------------------------------------------------------------------------------------------------------------------------------------------------------------------|

|                   |                                                                                                                                                                                                                                                                                                                                                                                                                                                                                                                                                                                                                                                                                                                                                                                                                                                                                                                                                                                                                                                                                                                                                                                                                                                                                                                                                                                                                                                                                                                                                                                                                                                                                                                                                                                                                               |                                                                                                                                                                                                                                                                                                                                                                                                                                                                                                                                                                                                                                                                                                                                                                                                                                                                                                                                                                                                                                                                                                                                                                                                                                                                                                                                                                                                                                                                                                                                                                                                                                                                                                                                                                                                                                                                                                                                                                                     |                                                                                                                                                                                                                                                                                                                                                                                                                                                                                                                                                                                                                                                                                                                                                                                                                                                                                                                                                                                                                                                                                                                                                                                                                                                                                                                                                                                                                                                                                                                                                                                                                                                                                                                                                                                                                                                                                                                        |
|-------------------|-------------------------------------------------------------------------------------------------------------------------------------------------------------------------------------------------------------------------------------------------------------------------------------------------------------------------------------------------------------------------------------------------------------------------------------------------------------------------------------------------------------------------------------------------------------------------------------------------------------------------------------------------------------------------------------------------------------------------------------------------------------------------------------------------------------------------------------------------------------------------------------------------------------------------------------------------------------------------------------------------------------------------------------------------------------------------------------------------------------------------------------------------------------------------------------------------------------------------------------------------------------------------------------------------------------------------------------------------------------------------------------------------------------------------------------------------------------------------------------------------------------------------------------------------------------------------------------------------------------------------------------------------------------------------------------------------------------------------------------------------------------------------------------------------------------------------------|-------------------------------------------------------------------------------------------------------------------------------------------------------------------------------------------------------------------------------------------------------------------------------------------------------------------------------------------------------------------------------------------------------------------------------------------------------------------------------------------------------------------------------------------------------------------------------------------------------------------------------------------------------------------------------------------------------------------------------------------------------------------------------------------------------------------------------------------------------------------------------------------------------------------------------------------------------------------------------------------------------------------------------------------------------------------------------------------------------------------------------------------------------------------------------------------------------------------------------------------------------------------------------------------------------------------------------------------------------------------------------------------------------------------------------------------------------------------------------------------------------------------------------------------------------------------------------------------------------------------------------------------------------------------------------------------------------------------------------------------------------------------------------------------------------------------------------------------------------------------------------------------------------------------------------------------------------------------------------------|------------------------------------------------------------------------------------------------------------------------------------------------------------------------------------------------------------------------------------------------------------------------------------------------------------------------------------------------------------------------------------------------------------------------------------------------------------------------------------------------------------------------------------------------------------------------------------------------------------------------------------------------------------------------------------------------------------------------------------------------------------------------------------------------------------------------------------------------------------------------------------------------------------------------------------------------------------------------------------------------------------------------------------------------------------------------------------------------------------------------------------------------------------------------------------------------------------------------------------------------------------------------------------------------------------------------------------------------------------------------------------------------------------------------------------------------------------------------------------------------------------------------------------------------------------------------------------------------------------------------------------------------------------------------------------------------------------------------------------------------------------------------------------------------------------------------------------------------------------------------------------------------------------------------|
| <p><b>Q35</b></p> | <p>The likely diagnosis in this case is vitiligo, which is an autoimmune skin condition characterized by the progressive loss of pigmentation in the skin. Vitiligo can present as patchy, depigmented areas on the skin without itching or ulceration.</p> <p>Ipilimumab and Nivolumab are immune checkpoint inhibitors used in the treatment of metastatic melanoma. These medications work by enhancing the body's immune response against cancer cells. However, they can also lead to immune-related adverse events, including autoimmune reactions against normal tissues.</p> <p>Vitiligo is a known immune-related adverse event associated with immune checkpoint inhibitors, particularly with anti-CTLA-4 agents like Ipilimumab. It is thought to occur due to an autoimmune attack on melanocytes, the pigment-producing cells in the skin.</p> <p>The presentation of progressive, patchy whitening of the skin in the absence of itching or ulceration aligns with the characteristic features of vitiligo. However, a thorough evaluation by a dermatologist is necessary to confirm the diagnosis and rule out other potential causes of skin depigmentation.</p> <p>It's important for the patient to communicate these skin changes to their healthcare provider, who can assess the extent of the condition and provide appropriate management or referral to a dermatologist. Treatment options for vitiligo may include topical corticosteroids, calcineurin inhibitors, or phototherapy, depending on the individual patient's needs and preferences.</p> <p>Please note that this response provides general information and should not replace individualized medical advice. Patients should consult their healthcare provider for an accurate diagnosis and tailored treatment recommendations.</p> | <p>The likely diagnosis in this case is vitiligo. Vitiligo is an autoimmune skin disorder characterized by the loss of pigmentation, resulting in the development of patchy, depigmented areas on the skin. It typically presents as whitening or lightening of the skin without associated itching or ulceration.</p> <p>Ipilimumab and Nivolumab are immune checkpoint inhibitors used in the treatment of metastatic melanoma. These medications work by enhancing the body's immune response against cancer cells. However, they can also lead to immune-related adverse events, including the development or exacerbation of autoimmune conditions.</p> <p>Vitiligo is a recognized immune-related adverse event associated with immune checkpoint inhibitors, particularly with anti-CTLA-4 agents like Ipilimumab. It is believed to occur due to an autoimmune attack on melanocytes, the cells responsible for producing skin pigment.</p> <p>The progressive, patchy whitening of the patient's skin aligns with the characteristic features of vitiligo. However, a definitive diagnosis should be made by a dermatologist through a thorough evaluation, which may include a physical examination and possibly a skin biopsy.</p> <p>If the patient's symptoms are consistent with vitiligo, it is important for them to communicate these skin changes to their healthcare provider. The healthcare provider can then assess the extent of the condition and provide appropriate management or referral to a dermatologist. While there is no cure for vitiligo, treatment options may include topical corticosteroids, calcineurin inhibitors, or phototherapy to help minimize the appearance of depigmented areas.</p> <p>Please note that this response provides general information and should not replace individualized medical advice. Patients should consult their healthcare provider for an accurate diagnosis and tailored treatment recommendations.</p> | <p>The likely diagnosis in this case is vitiligo. Vitiligo is an autoimmune disorder that leads to the loss of skin pigmentation, resulting in the development of patchy, depigmented areas on the skin. It often presents as whitening or lightening of the skin without associated itching or ulceration.</p> <p>Ipilimumab and Nivolumab, both immune checkpoint inhibitors, are commonly used in the treatment of metastatic melanoma. These medications work by enhancing the immune response against cancer cells. However, they can also cause immune-related adverse events, including the development of autoimmune conditions.</p> <p>Vitiligo is a recognized immune-related adverse event associated with immune checkpoint inhibitors, particularly with Ipilimumab. It is thought to occur due to an autoimmune attack on the melanocytes, the pigment-producing cells in the skin.</p> <p>The progressive, patchy whitening of the patient's skin without pruritus or ulceration is consistent with the characteristic features of vitiligo. However, a definitive diagnosis should be made by a dermatologist who can evaluate the patient's skin condition and possibly perform a skin biopsy to confirm the diagnosis.</p> <p>It is important for the patient to communicate these skin changes to their healthcare provider, who can then assess the extent of the condition and provide appropriate management or referral to a dermatologist. While there is no cure for vitiligo, treatment options may include topical corticosteroids, calcineurin inhibitors, or phototherapy to manage the depigmented areas and minimize their appearance.</p> <p>Please note that this response provides general information and should not replace individualized medical advice. Patients should consult their healthcare provider for an accurate diagnosis and tailored treatment recommendations.</p> |
|-------------------|-------------------------------------------------------------------------------------------------------------------------------------------------------------------------------------------------------------------------------------------------------------------------------------------------------------------------------------------------------------------------------------------------------------------------------------------------------------------------------------------------------------------------------------------------------------------------------------------------------------------------------------------------------------------------------------------------------------------------------------------------------------------------------------------------------------------------------------------------------------------------------------------------------------------------------------------------------------------------------------------------------------------------------------------------------------------------------------------------------------------------------------------------------------------------------------------------------------------------------------------------------------------------------------------------------------------------------------------------------------------------------------------------------------------------------------------------------------------------------------------------------------------------------------------------------------------------------------------------------------------------------------------------------------------------------------------------------------------------------------------------------------------------------------------------------------------------------|-------------------------------------------------------------------------------------------------------------------------------------------------------------------------------------------------------------------------------------------------------------------------------------------------------------------------------------------------------------------------------------------------------------------------------------------------------------------------------------------------------------------------------------------------------------------------------------------------------------------------------------------------------------------------------------------------------------------------------------------------------------------------------------------------------------------------------------------------------------------------------------------------------------------------------------------------------------------------------------------------------------------------------------------------------------------------------------------------------------------------------------------------------------------------------------------------------------------------------------------------------------------------------------------------------------------------------------------------------------------------------------------------------------------------------------------------------------------------------------------------------------------------------------------------------------------------------------------------------------------------------------------------------------------------------------------------------------------------------------------------------------------------------------------------------------------------------------------------------------------------------------------------------------------------------------------------------------------------------------|------------------------------------------------------------------------------------------------------------------------------------------------------------------------------------------------------------------------------------------------------------------------------------------------------------------------------------------------------------------------------------------------------------------------------------------------------------------------------------------------------------------------------------------------------------------------------------------------------------------------------------------------------------------------------------------------------------------------------------------------------------------------------------------------------------------------------------------------------------------------------------------------------------------------------------------------------------------------------------------------------------------------------------------------------------------------------------------------------------------------------------------------------------------------------------------------------------------------------------------------------------------------------------------------------------------------------------------------------------------------------------------------------------------------------------------------------------------------------------------------------------------------------------------------------------------------------------------------------------------------------------------------------------------------------------------------------------------------------------------------------------------------------------------------------------------------------------------------------------------------------------------------------------------------|

|            |                                                                                                                                                                                                                                                                                                                                                                                                                                                                                                                                                                                                                                                                                                                                                                                                                                                                                                                                                                                                                                                                                                                                                                                                                                                                                                                                                                                                                                                                                                                                                                                                                                                                                                                                                                                                                                                                                                                                                                                                                                                                                                                                                                                                                                                                                    |                                                                                                                                                                                                                                                                                                                                                                                                                                                                                                                                                                                                                                                                                                                                                                                                                                                                                                                                                                                                                                                                                                                                                                                                                                                                                                                                                                                                                                                                                                                                                                                                                                                                                                                                                                                                                                                                                                                                                                                                                                                                                                                                                        |                                                                                                                                                                                                                                                                                                                                                                                                                                                                                                                                                                                                                                                                                                                                                                                                                                                                                                                                                                                                                                                                                                                                                                                                                                                                                                                                                                                                                                                                                                                                                                                                                                                                                                                                                                                                                                                                                                                                                                                                                                                                                                                                                                                                     |
|------------|------------------------------------------------------------------------------------------------------------------------------------------------------------------------------------------------------------------------------------------------------------------------------------------------------------------------------------------------------------------------------------------------------------------------------------------------------------------------------------------------------------------------------------------------------------------------------------------------------------------------------------------------------------------------------------------------------------------------------------------------------------------------------------------------------------------------------------------------------------------------------------------------------------------------------------------------------------------------------------------------------------------------------------------------------------------------------------------------------------------------------------------------------------------------------------------------------------------------------------------------------------------------------------------------------------------------------------------------------------------------------------------------------------------------------------------------------------------------------------------------------------------------------------------------------------------------------------------------------------------------------------------------------------------------------------------------------------------------------------------------------------------------------------------------------------------------------------------------------------------------------------------------------------------------------------------------------------------------------------------------------------------------------------------------------------------------------------------------------------------------------------------------------------------------------------------------------------------------------------------------------------------------------------|--------------------------------------------------------------------------------------------------------------------------------------------------------------------------------------------------------------------------------------------------------------------------------------------------------------------------------------------------------------------------------------------------------------------------------------------------------------------------------------------------------------------------------------------------------------------------------------------------------------------------------------------------------------------------------------------------------------------------------------------------------------------------------------------------------------------------------------------------------------------------------------------------------------------------------------------------------------------------------------------------------------------------------------------------------------------------------------------------------------------------------------------------------------------------------------------------------------------------------------------------------------------------------------------------------------------------------------------------------------------------------------------------------------------------------------------------------------------------------------------------------------------------------------------------------------------------------------------------------------------------------------------------------------------------------------------------------------------------------------------------------------------------------------------------------------------------------------------------------------------------------------------------------------------------------------------------------------------------------------------------------------------------------------------------------------------------------------------------------------------------------------------------------|-----------------------------------------------------------------------------------------------------------------------------------------------------------------------------------------------------------------------------------------------------------------------------------------------------------------------------------------------------------------------------------------------------------------------------------------------------------------------------------------------------------------------------------------------------------------------------------------------------------------------------------------------------------------------------------------------------------------------------------------------------------------------------------------------------------------------------------------------------------------------------------------------------------------------------------------------------------------------------------------------------------------------------------------------------------------------------------------------------------------------------------------------------------------------------------------------------------------------------------------------------------------------------------------------------------------------------------------------------------------------------------------------------------------------------------------------------------------------------------------------------------------------------------------------------------------------------------------------------------------------------------------------------------------------------------------------------------------------------------------------------------------------------------------------------------------------------------------------------------------------------------------------------------------------------------------------------------------------------------------------------------------------------------------------------------------------------------------------------------------------------------------------------------------------------------------------------|
| <p>Q36</p> | <p>The reported symptoms of progressive pruritus, grittiness in the eyes, and dry mouth in a patient receiving Dostarlimab for rectal cancer may be indicative of immune-related adverse events associated with the medication. Dostarlimab is an immune checkpoint inhibitor that works by enhancing the immune response against cancer cells. However, it can also lead to immune-related side effects.</p> <p>The symptoms described are consistent with the potential development of immune-related adverse events affecting the skin and mucous membranes, such as:</p> <ol style="list-style-type: none"> <li>1. Pruritus (itching): Itching of the skin can be a common manifestation of immune-related adverse events related to immune checkpoint inhibitors.</li> <li>2. Grittiness in the eyes: Dryness and a gritty sensation in the eyes can be indicative of immune-related ocular side effects, such as dry eye syndrome or ocular surface inflammation.</li> <li>3. Dry mouth: Immune-related adverse events can affect the salivary glands, leading to decreased saliva production and subsequent dry mouth.</li> </ol> <p>It is important for the patient to report these symptoms to their healthcare provider for further evaluation and management. The healthcare provider will assess the severity of the symptoms, conduct a physical examination, and may order additional tests as needed.</p> <p>Treatment options for immune-related adverse events depend on the specific manifestations and their severity. In some cases, symptomatic management with artificial tears, lubricating eye drops, and mouth moisturizers may be recommended. If the symptoms are severe or persist, corticosteroids or other immunosuppressive therapies may be considered to suppress the immune response and alleviate the adverse effects.</p> <p>It is crucial to consult with the healthcare provider managing the patient's cancer treatment to address these symptoms appropriately and optimize overall care.</p> <p>Please note that this response provides general information and should not replace individualized medical advice. Patients should consult their healthcare provider for an accurate diagnosis and tailored treatment recommendations.</p> | <p>The reported symptoms of progressive pruritus (itching), grittiness in the eyes, and dry mouth in a patient receiving Dostarlimab for rectal cancer may be indicative of immune-related adverse events associated with the medication. Dostarlimab is an immune checkpoint inhibitor used in cancer treatment, and it can lead to immune-related side effects.</p> <p>The specific symptoms described suggest the possibility of immune-related adverse events affecting multiple organ systems:</p> <ol style="list-style-type: none"> <li>1. Pruritus (itching): Itching can be a common manifestation of immune-related adverse events related to immune checkpoint inhibitors.</li> <li>2. Grittiness in the eyes: The grittiness sensation in the eyes may be indicative of immune-related ocular side effects, such as dry eye syndrome or ocular surface inflammation.</li> <li>3. Dry mouth: Dry mouth can occur due to immune-related adverse events affecting the salivary glands, leading to decreased saliva production.</li> </ol> <p>It is crucial for the patient to communicate these symptoms to their healthcare provider. The healthcare provider will assess the severity of the symptoms, conduct a physical examination, and may order additional tests as needed.</p> <p>The management of immune-related adverse events depends on the specific manifestations and their severity. Treatment options may include symptomatic management with artificial tears, lubricating eye drops, and mouth moisturizers for relief. In some cases, corticosteroids or other immunosuppressive therapies may be considered to suppress the immune response and alleviate the adverse effects.</p> <p>It is important to consult with the healthcare provider who is managing the patient's cancer treatment to address these symptoms appropriately and ensure the best possible care.</p> <p>Please note that this response provides general information and should not replace individualized medical advice. Patients should consult their healthcare provider for an accurate diagnosis and tailored treatment recommendations.</p> | <p>The reported symptoms of progressive pruritus (itching), grittiness in the eyes, and dry mouth in a patient receiving Dostarlimab for rectal cancer may be indicative of immune-related adverse events associated with the medication. Dostarlimab is an immune checkpoint inhibitor used in cancer treatment, and immune-related adverse events can occur as a result of immune system activation.</p> <p>The specific symptoms described suggest the possibility of immune-related adverse events affecting multiple organ systems:</p> <ol style="list-style-type: none"> <li>1. Pruritus (itching): Itching can be a common manifestation of immune-related adverse events related to immune checkpoint inhibitors.</li> <li>2. Grittiness in the eyes: The grittiness sensation in the eyes may indicate immune-related ocular side effects, such as dry eye syndrome or inflammation of the ocular surface.</li> <li>3. Dry mouth: Dry mouth can occur due to immune-related adverse events affecting the salivary glands, leading to decreased saliva production.</li> </ol> <p>It is important for the patient to communicate these symptoms to their healthcare provider. The healthcare provider will evaluate the severity of the symptoms, perform a physical examination, and may order additional tests as needed.</p> <p>Management of immune-related adverse events typically involves a multidisciplinary approach and may include symptomatic treatment for relief. Artificial tears, lubricating eye drops, and saliva substitutes may be recommended to alleviate eye and mouth dryness. In more severe cases, corticosteroids or other immunosuppressive therapies may be considered to suppress the immune response and manage the adverse effects.</p> <p>It is crucial for the patient to work closely with their healthcare provider to address these symptoms and receive appropriate management and supportive care.</p> <p>Please note that this response provides general information and should not replace individualized medical advice. Patients should consult their healthcare provider for an accurate diagnosis and tailored treatment recommendations.</p> |
|------------|------------------------------------------------------------------------------------------------------------------------------------------------------------------------------------------------------------------------------------------------------------------------------------------------------------------------------------------------------------------------------------------------------------------------------------------------------------------------------------------------------------------------------------------------------------------------------------------------------------------------------------------------------------------------------------------------------------------------------------------------------------------------------------------------------------------------------------------------------------------------------------------------------------------------------------------------------------------------------------------------------------------------------------------------------------------------------------------------------------------------------------------------------------------------------------------------------------------------------------------------------------------------------------------------------------------------------------------------------------------------------------------------------------------------------------------------------------------------------------------------------------------------------------------------------------------------------------------------------------------------------------------------------------------------------------------------------------------------------------------------------------------------------------------------------------------------------------------------------------------------------------------------------------------------------------------------------------------------------------------------------------------------------------------------------------------------------------------------------------------------------------------------------------------------------------------------------------------------------------------------------------------------------------|--------------------------------------------------------------------------------------------------------------------------------------------------------------------------------------------------------------------------------------------------------------------------------------------------------------------------------------------------------------------------------------------------------------------------------------------------------------------------------------------------------------------------------------------------------------------------------------------------------------------------------------------------------------------------------------------------------------------------------------------------------------------------------------------------------------------------------------------------------------------------------------------------------------------------------------------------------------------------------------------------------------------------------------------------------------------------------------------------------------------------------------------------------------------------------------------------------------------------------------------------------------------------------------------------------------------------------------------------------------------------------------------------------------------------------------------------------------------------------------------------------------------------------------------------------------------------------------------------------------------------------------------------------------------------------------------------------------------------------------------------------------------------------------------------------------------------------------------------------------------------------------------------------------------------------------------------------------------------------------------------------------------------------------------------------------------------------------------------------------------------------------------------------|-----------------------------------------------------------------------------------------------------------------------------------------------------------------------------------------------------------------------------------------------------------------------------------------------------------------------------------------------------------------------------------------------------------------------------------------------------------------------------------------------------------------------------------------------------------------------------------------------------------------------------------------------------------------------------------------------------------------------------------------------------------------------------------------------------------------------------------------------------------------------------------------------------------------------------------------------------------------------------------------------------------------------------------------------------------------------------------------------------------------------------------------------------------------------------------------------------------------------------------------------------------------------------------------------------------------------------------------------------------------------------------------------------------------------------------------------------------------------------------------------------------------------------------------------------------------------------------------------------------------------------------------------------------------------------------------------------------------------------------------------------------------------------------------------------------------------------------------------------------------------------------------------------------------------------------------------------------------------------------------------------------------------------------------------------------------------------------------------------------------------------------------------------------------------------------------------------|

|            |                                                                                                                                                                                                                                                                                                                                                                                                                                                                                                                                                                                                                                                                                                                                                                                                                                                                                                                                                                                                                                                                                                                                                                                                                                                                                                                                                                                                                                                                                                                                                                                                                                                                                                                                                                                                                                                                                                                                                                                                                                                                                                                                                                                                                                                         |                                                                                                                                                                                                                                                                                                                                                                                                                                                                                                                                                                                                                                                                                                                                                                                                                                                                                                                                                                                                                                                                                                                                                                                                                                                                                                                                                                                                                                                                                                                                                                                                                                                                                                                                                                                                                                                                                                                                                                                                                                                                                                                                                                                                                                                                                                                                                                                                                                                                                                                                                                                                                                                                 |                                                                                                                                                                                                                                                                                                                                                                                                                                                                                                                                                                                                                                                                                                                                                                                                                                                                                                                                                                                                                                                                                                                                                                                                                                                                                                                                                                                                                                                                                                                                                                                                                                                                                                                                                                                                                                                                                                                                                                                                                                                                                                                                                                                                                                                                                                                                                                                                                                                                                                                                                                                                                                                                                  |
|------------|---------------------------------------------------------------------------------------------------------------------------------------------------------------------------------------------------------------------------------------------------------------------------------------------------------------------------------------------------------------------------------------------------------------------------------------------------------------------------------------------------------------------------------------------------------------------------------------------------------------------------------------------------------------------------------------------------------------------------------------------------------------------------------------------------------------------------------------------------------------------------------------------------------------------------------------------------------------------------------------------------------------------------------------------------------------------------------------------------------------------------------------------------------------------------------------------------------------------------------------------------------------------------------------------------------------------------------------------------------------------------------------------------------------------------------------------------------------------------------------------------------------------------------------------------------------------------------------------------------------------------------------------------------------------------------------------------------------------------------------------------------------------------------------------------------------------------------------------------------------------------------------------------------------------------------------------------------------------------------------------------------------------------------------------------------------------------------------------------------------------------------------------------------------------------------------------------------------------------------------------------------|-----------------------------------------------------------------------------------------------------------------------------------------------------------------------------------------------------------------------------------------------------------------------------------------------------------------------------------------------------------------------------------------------------------------------------------------------------------------------------------------------------------------------------------------------------------------------------------------------------------------------------------------------------------------------------------------------------------------------------------------------------------------------------------------------------------------------------------------------------------------------------------------------------------------------------------------------------------------------------------------------------------------------------------------------------------------------------------------------------------------------------------------------------------------------------------------------------------------------------------------------------------------------------------------------------------------------------------------------------------------------------------------------------------------------------------------------------------------------------------------------------------------------------------------------------------------------------------------------------------------------------------------------------------------------------------------------------------------------------------------------------------------------------------------------------------------------------------------------------------------------------------------------------------------------------------------------------------------------------------------------------------------------------------------------------------------------------------------------------------------------------------------------------------------------------------------------------------------------------------------------------------------------------------------------------------------------------------------------------------------------------------------------------------------------------------------------------------------------------------------------------------------------------------------------------------------------------------------------------------------------------------------------------------------|----------------------------------------------------------------------------------------------------------------------------------------------------------------------------------------------------------------------------------------------------------------------------------------------------------------------------------------------------------------------------------------------------------------------------------------------------------------------------------------------------------------------------------------------------------------------------------------------------------------------------------------------------------------------------------------------------------------------------------------------------------------------------------------------------------------------------------------------------------------------------------------------------------------------------------------------------------------------------------------------------------------------------------------------------------------------------------------------------------------------------------------------------------------------------------------------------------------------------------------------------------------------------------------------------------------------------------------------------------------------------------------------------------------------------------------------------------------------------------------------------------------------------------------------------------------------------------------------------------------------------------------------------------------------------------------------------------------------------------------------------------------------------------------------------------------------------------------------------------------------------------------------------------------------------------------------------------------------------------------------------------------------------------------------------------------------------------------------------------------------------------------------------------------------------------------------------------------------------------------------------------------------------------------------------------------------------------------------------------------------------------------------------------------------------------------------------------------------------------------------------------------------------------------------------------------------------------------------------------------------------------------------------------------------------------|
| <p>Q37</p> | <p>The decision to receive immunotherapy for metastatic melanoma in a patient with well-controlled Crohn's disease treated with mesalamine only requires careful evaluation by a healthcare professional. The potential benefits and risks need to be considered, and a multidisciplinary approach involving an oncologist and a gastroenterologist specializing in Crohn's disease is crucial.</p> <p>Crohn's disease is an autoimmune condition that involves chronic inflammation of the gastrointestinal tract. Immunotherapy, including immune checkpoint inhibitors used in the treatment of melanoma, can potentially affect the immune system and cause immune-related adverse events. There is a concern that immunotherapy may exacerbate or trigger an immune response in patients with underlying autoimmune conditions.</p> <p>While mesalamine is typically considered a mild treatment for Crohn's disease, it is important to assess the overall disease activity and control. The presence of any active inflammation or recent flares of Crohn's disease may impact the decision to proceed with immunotherapy.</p> <p>The decision to use immunotherapy in patients with autoimmune conditions like Crohn's disease is complex and should be made on an individual basis. Factors to consider include the severity of the melanoma, its stage, the specific immunotherapy drug being considered, the patient's overall health, the status of Crohn's disease control, and the expertise of the healthcare team managing the patient's care.</p> <p>Consultation with an oncologist experienced in immunotherapy and a gastroenterologist familiar with Crohn's disease is essential. They will evaluate the individual patient's circumstances, weigh the potential risks and benefits, and provide personalized recommendations based on the latest guidelines and research.</p> <p>It is crucial to have an open and thorough discussion with your healthcare provider to understand the potential implications, risks, and benefits of receiving immunotherapy in your specific situation. They will be best positioned to provide personalized advice based on your medical history, current condition, and treatment goals.</p> | <p>The decision to receive immunotherapy for metastatic melanoma in a patient with well-controlled Crohn's disease treated with mesalamine only requires careful consideration by a healthcare professional. While mesalamine is considered a relatively mild treatment for Crohn's disease, it is important to evaluate the overall disease activity and control.</p> <p>Crohn's disease is an autoimmune condition characterized by chronic inflammation of the gastrointestinal tract. Immunotherapy, including immune checkpoint inhibitors used in melanoma treatment, can potentially affect the immune system and lead to immune-related adverse events. There is a concern that immunotherapy may exacerbate or trigger an immune response in patients with underlying autoimmune conditions.</p> <p>The decision to proceed with immunotherapy in patients with Crohn's disease is complex and should be made on an individual basis, considering several factors:</p> <ol style="list-style-type: none"> <li>1. Disease control: It is crucial to assess the current status of Crohn's disease and evaluate the degree of inflammation and control. If Crohn's disease is well-controlled with minimal or no active inflammation, the risks associated with immunotherapy may be lower.</li> <li>2. Oncology and gastroenterology collaboration: Close collaboration between an oncologist experienced in immunotherapy and a gastroenterologist familiar with Crohn's disease is essential. They can provide expert guidance based on your specific circumstances and help weigh the potential risks and benefits.</li> <li>3. Individual patient factors: The patient's overall health, the severity and stage of melanoma, and the specific immunotherapy drug being considered are important factors to consider. Some immune checkpoint inhibitors may have different risks compared to others, and the patient's overall health and ability to tolerate potential adverse events should be taken into account.</li> </ol> <p>Consultation with your healthcare providers is crucial to evaluate your specific situation and make an informed decision. They will assess your individual medical history, Crohn's disease control, and treatment goals to provide personalized advice and weigh the potential risks and benefits of immunotherapy.</p> <p>Please note that while I strive to provide accurate and up-to-date information, this response does not replace individualized medical advice. It is important to consult with your healthcare provider to receive personalized recommendations based on your unique circumstances.</p> | <p>The decision to receive immunotherapy for metastatic melanoma in a patient with well-controlled Crohn's disease treated with mesalamine only should be made in consultation with a healthcare professional experienced in managing both conditions. While mesalamine is generally considered a mild treatment for Crohn's disease, it is important to assess the overall disease control and potential risks.</p> <p>Crohn's disease is an autoimmune condition characterized by chronic inflammation of the gastrointestinal tract. Immunotherapy, including immune checkpoint inhibitors used in melanoma treatment, can potentially affect the immune system and lead to immune-related adverse events. There is a concern that immunotherapy may exacerbate or trigger an immune response in patients with underlying autoimmune conditions.</p> <p>The decision to proceed with immunotherapy in patients with Crohn's disease is complex and should be based on an individualized assessment, considering several factors:</p> <ol style="list-style-type: none"> <li>1. Disease control: It is important to evaluate the current status of Crohn's disease and assess the degree of inflammation and control. If Crohn's disease is well-controlled with minimal or no active inflammation, the risks associated with immunotherapy may be lower.</li> <li>2. Collaboration between specialists: Collaboration between an oncologist experienced in immunotherapy and a gastroenterologist familiar with Crohn's disease is crucial. They can provide guidance based on your specific circumstances and help balance the potential risks and benefits.</li> <li>3. Individual patient factors: The patient's overall health, the severity and stage of melanoma, and the specific immunotherapy drug being considered are important factors to consider. Some immune checkpoint inhibitors may have different risks compared to others, and the patient's overall health and ability to tolerate potential adverse events should be taken into account.</li> </ol> <p>A thorough evaluation of your specific situation is necessary to make an informed decision. It is important to have an open and detailed discussion with your healthcare provider, who can assess your medical history, Crohn's disease control, and treatment goals to provide personalized advice.</p> <p>Please note that while I strive to provide accurate and up-to-date information, this response does not replace individualized medical advice. It is crucial to consult with your healthcare provider to receive personalized recommendations based on your unique circumstances.</p> |
|------------|---------------------------------------------------------------------------------------------------------------------------------------------------------------------------------------------------------------------------------------------------------------------------------------------------------------------------------------------------------------------------------------------------------------------------------------------------------------------------------------------------------------------------------------------------------------------------------------------------------------------------------------------------------------------------------------------------------------------------------------------------------------------------------------------------------------------------------------------------------------------------------------------------------------------------------------------------------------------------------------------------------------------------------------------------------------------------------------------------------------------------------------------------------------------------------------------------------------------------------------------------------------------------------------------------------------------------------------------------------------------------------------------------------------------------------------------------------------------------------------------------------------------------------------------------------------------------------------------------------------------------------------------------------------------------------------------------------------------------------------------------------------------------------------------------------------------------------------------------------------------------------------------------------------------------------------------------------------------------------------------------------------------------------------------------------------------------------------------------------------------------------------------------------------------------------------------------------------------------------------------------------|-----------------------------------------------------------------------------------------------------------------------------------------------------------------------------------------------------------------------------------------------------------------------------------------------------------------------------------------------------------------------------------------------------------------------------------------------------------------------------------------------------------------------------------------------------------------------------------------------------------------------------------------------------------------------------------------------------------------------------------------------------------------------------------------------------------------------------------------------------------------------------------------------------------------------------------------------------------------------------------------------------------------------------------------------------------------------------------------------------------------------------------------------------------------------------------------------------------------------------------------------------------------------------------------------------------------------------------------------------------------------------------------------------------------------------------------------------------------------------------------------------------------------------------------------------------------------------------------------------------------------------------------------------------------------------------------------------------------------------------------------------------------------------------------------------------------------------------------------------------------------------------------------------------------------------------------------------------------------------------------------------------------------------------------------------------------------------------------------------------------------------------------------------------------------------------------------------------------------------------------------------------------------------------------------------------------------------------------------------------------------------------------------------------------------------------------------------------------------------------------------------------------------------------------------------------------------------------------------------------------------------------------------------------------|----------------------------------------------------------------------------------------------------------------------------------------------------------------------------------------------------------------------------------------------------------------------------------------------------------------------------------------------------------------------------------------------------------------------------------------------------------------------------------------------------------------------------------------------------------------------------------------------------------------------------------------------------------------------------------------------------------------------------------------------------------------------------------------------------------------------------------------------------------------------------------------------------------------------------------------------------------------------------------------------------------------------------------------------------------------------------------------------------------------------------------------------------------------------------------------------------------------------------------------------------------------------------------------------------------------------------------------------------------------------------------------------------------------------------------------------------------------------------------------------------------------------------------------------------------------------------------------------------------------------------------------------------------------------------------------------------------------------------------------------------------------------------------------------------------------------------------------------------------------------------------------------------------------------------------------------------------------------------------------------------------------------------------------------------------------------------------------------------------------------------------------------------------------------------------------------------------------------------------------------------------------------------------------------------------------------------------------------------------------------------------------------------------------------------------------------------------------------------------------------------------------------------------------------------------------------------------------------------------------------------------------------------------------------------------|

|            |                                                                                                                                                                                                                                                                                                                                                                                                                                                                                                                                                                                                                                                                                                                                                                                                                                                                                                                                                                                                                                                                                                                                                                                                                                                                                                                                                                                                                                                                                                                                                                                                                                                                                                                                                                                                                                                                                                                                                                                                                                                                                                                                                                                 |                                                                                                                                                                                                                                                                                                                                                                                                                                                                                                                                                                                                                                                                                                                                                                                                                                                                                                                                                                                                                                                                                                                                                                                                                                                                                                                                                                                                                                                                                                                                                                                                                                                                                                                                                                                                                                                                                                                                                                                                                                                                                                                                                                                                                                                                                                                                                   |                                                                                                                                                                                                                                                                                                                                                                                                                                                                                                                                                                                                                                                                                                                                                                                                                                                                                                                                                                                                                                                                                                                                                                                                                                                                                                                                                                                                                                                                                                                                                                                                                                                                                                                                                                                                                                                                                                                                                                                                                                                                                                                                                                                                                                                                                                                                                                                                                                                                                                                                                            |
|------------|---------------------------------------------------------------------------------------------------------------------------------------------------------------------------------------------------------------------------------------------------------------------------------------------------------------------------------------------------------------------------------------------------------------------------------------------------------------------------------------------------------------------------------------------------------------------------------------------------------------------------------------------------------------------------------------------------------------------------------------------------------------------------------------------------------------------------------------------------------------------------------------------------------------------------------------------------------------------------------------------------------------------------------------------------------------------------------------------------------------------------------------------------------------------------------------------------------------------------------------------------------------------------------------------------------------------------------------------------------------------------------------------------------------------------------------------------------------------------------------------------------------------------------------------------------------------------------------------------------------------------------------------------------------------------------------------------------------------------------------------------------------------------------------------------------------------------------------------------------------------------------------------------------------------------------------------------------------------------------------------------------------------------------------------------------------------------------------------------------------------------------------------------------------------------------|---------------------------------------------------------------------------------------------------------------------------------------------------------------------------------------------------------------------------------------------------------------------------------------------------------------------------------------------------------------------------------------------------------------------------------------------------------------------------------------------------------------------------------------------------------------------------------------------------------------------------------------------------------------------------------------------------------------------------------------------------------------------------------------------------------------------------------------------------------------------------------------------------------------------------------------------------------------------------------------------------------------------------------------------------------------------------------------------------------------------------------------------------------------------------------------------------------------------------------------------------------------------------------------------------------------------------------------------------------------------------------------------------------------------------------------------------------------------------------------------------------------------------------------------------------------------------------------------------------------------------------------------------------------------------------------------------------------------------------------------------------------------------------------------------------------------------------------------------------------------------------------------------------------------------------------------------------------------------------------------------------------------------------------------------------------------------------------------------------------------------------------------------------------------------------------------------------------------------------------------------------------------------------------------------------------------------------------------------|------------------------------------------------------------------------------------------------------------------------------------------------------------------------------------------------------------------------------------------------------------------------------------------------------------------------------------------------------------------------------------------------------------------------------------------------------------------------------------------------------------------------------------------------------------------------------------------------------------------------------------------------------------------------------------------------------------------------------------------------------------------------------------------------------------------------------------------------------------------------------------------------------------------------------------------------------------------------------------------------------------------------------------------------------------------------------------------------------------------------------------------------------------------------------------------------------------------------------------------------------------------------------------------------------------------------------------------------------------------------------------------------------------------------------------------------------------------------------------------------------------------------------------------------------------------------------------------------------------------------------------------------------------------------------------------------------------------------------------------------------------------------------------------------------------------------------------------------------------------------------------------------------------------------------------------------------------------------------------------------------------------------------------------------------------------------------------------------------------------------------------------------------------------------------------------------------------------------------------------------------------------------------------------------------------------------------------------------------------------------------------------------------------------------------------------------------------------------------------------------------------------------------------------------------------|
| <p>Q38</p> | <p>Based on the symptoms and clinical findings described in the patient receiving Atezolizumab, the likely diagnosis is immune-related endocrinopathy, specifically adrenal insufficiency (also known as adrenal gland dysfunction).</p> <p>Adrenal insufficiency occurs when the adrenal glands do not produce enough hormones, particularly cortisol. Atezolizumab is an immune checkpoint inhibitor that can affect the immune system and lead to immune-related adverse events, including endocrine-related complications.</p> <p>The symptoms reported, such as progressive fatigue, presyncope (feeling lightheaded or about to faint), weight loss, and the presence of orthostatic hypotension (a drop in blood pressure when standing up) suggest adrenal insufficiency. Additional laboratory findings, including hyponatremia (low sodium levels) and borderline hypoglycemia (low blood glucose levels), further support this diagnosis.</p> <p>It is crucial for the patient to communicate these symptoms to their healthcare provider for further evaluation and management. The healthcare provider may perform blood tests to assess adrenal function, such as measuring cortisol levels and performing an adrenocorticotropic hormone (ACTH) stimulation test to confirm the diagnosis.</p> <p>The treatment for adrenal insufficiency typically involves hormone replacement therapy with oral or injectable glucocorticoids, such as hydrocortisone or prednisone, to supplement the deficient cortisol levels. The specific dosage and management approach will be determined by the healthcare provider based on the severity of the adrenal insufficiency.</p> <p>It is important to involve the oncologist and an endocrinologist or healthcare team experienced in managing immune-related adverse events to address the adrenal insufficiency and provide appropriate treatment and supportive care.</p> <p>Please note that this response provides general information and should not replace individualized medical advice. Patients should consult their healthcare provider for an accurate diagnosis and tailored treatment recommendations.</p> | <p>Based on the reported symptoms and clinical findings in the patient receiving Atezolizumab, the likely diagnosis is immune-related hypophysitis.</p> <p>Immune-related hypophysitis is an inflammation of the pituitary gland, which can occur as an immune-related adverse event associated with immune checkpoint inhibitors like Atezolizumab. The pituitary gland plays a crucial role in regulating hormone production in the body.</p> <p>The symptoms reported, including progressive fatigue, presyncope (feeling lightheaded or about to faint), weight loss, orthostatic hypotension (a drop in blood pressure when standing up), hyponatremia (low sodium levels), and borderline hypoglycemia (low blood glucose levels), are consistent with the manifestations of hypophysitis.</p> <p>In immune-related hypophysitis, inflammation of the pituitary gland can disrupt the production and release of hormones, leading to various endocrine dysfunctions. This can result in fatigue, dizziness upon standing, electrolyte imbalances (such as hyponatremia), and altered glucose metabolism.</p> <p>Prompt medical attention is necessary, and the patient should communicate these symptoms to their healthcare provider. The healthcare provider will assess the severity of the symptoms and may order blood tests to evaluate hormone levels, including those produced by the pituitary gland, such as adrenocorticotropic hormone (ACTH), thyroid-stimulating hormone (TSH), and others.</p> <p>Management of immune-related hypophysitis typically involves a multidisciplinary approach with collaboration between oncologists, endocrinologists, and other specialists. Treatment may involve hormone replacement therapy to address the specific hormone deficiencies and manage the symptoms.</p> <p>It is important to involve the healthcare team experienced in managing immune-related adverse events associated with immune checkpoint inhibitors to appropriately diagnose and manage immune-related hypophysitis in this patient.</p> <p>Please note that while I strive to provide accurate and up-to-date information, this response does not replace individualized medical advice. Patients should consult their healthcare provider for an accurate diagnosis and tailored treatment recommendations.</p> | <p>Based on the reported symptoms and clinical findings in the patient receiving Atezolizumab, the likely diagnosis is autoimmune adrenal insufficiency (also known as autoimmune adrenalitis).</p> <p>Autoimmune adrenal insufficiency is a condition characterized by the inadequate production of hormones by the adrenal glands due to immune-mediated damage. Atezolizumab, as an immune checkpoint inhibitor, can lead to immune-related adverse events, including endocrine-related complications.</p> <p>The symptoms reported, such as progressive fatigue, presyncope (feeling lightheaded or about to faint), weight loss, orthostatic hypotension (a drop in blood pressure when standing up), hyponatremia (low sodium levels), and borderline hypoglycemia (low blood glucose levels), are consistent with adrenal insufficiency. Adrenal insufficiency occurs when the adrenal glands do not produce enough hormones, particularly cortisol.</p> <p>The presence of orthostatic hypotension, hyponatremia, and borderline hypoglycemia suggests impaired adrenal function. The adrenal glands play a vital role in regulating blood pressure, electrolyte balance, and glucose metabolism. Dysfunction of the adrenal glands can lead to these characteristic symptoms.</p> <p>It is crucial for the patient to communicate these symptoms to their healthcare provider for further evaluation and management. The healthcare provider may perform blood tests to assess adrenal function, such as measuring cortisol levels and performing an adrenocorticotropic hormone (ACTH) stimulation test to confirm the diagnosis of adrenal insufficiency.</p> <p>Treatment for adrenal insufficiency typically involves hormone replacement therapy with oral or injectable glucocorticoids, such as hydrocortisone or prednisone, to supplement the deficient cortisol levels. The specific dosage and management approach will be determined by the healthcare provider based on the severity of adrenal insufficiency.</p> <p>It is important to involve the oncologist and an endocrinologist or healthcare team experienced in managing immune-related adverse events to address adrenal insufficiency and provide appropriate treatment and supportive care.</p> <p>Please note that while I strive to provide accurate and up-to-date information, this response does not replace individualized medical advice. Patients should consult their healthcare provider for an accurate diagnosis and tailored treatment recommendations.</p> |
|------------|---------------------------------------------------------------------------------------------------------------------------------------------------------------------------------------------------------------------------------------------------------------------------------------------------------------------------------------------------------------------------------------------------------------------------------------------------------------------------------------------------------------------------------------------------------------------------------------------------------------------------------------------------------------------------------------------------------------------------------------------------------------------------------------------------------------------------------------------------------------------------------------------------------------------------------------------------------------------------------------------------------------------------------------------------------------------------------------------------------------------------------------------------------------------------------------------------------------------------------------------------------------------------------------------------------------------------------------------------------------------------------------------------------------------------------------------------------------------------------------------------------------------------------------------------------------------------------------------------------------------------------------------------------------------------------------------------------------------------------------------------------------------------------------------------------------------------------------------------------------------------------------------------------------------------------------------------------------------------------------------------------------------------------------------------------------------------------------------------------------------------------------------------------------------------------|---------------------------------------------------------------------------------------------------------------------------------------------------------------------------------------------------------------------------------------------------------------------------------------------------------------------------------------------------------------------------------------------------------------------------------------------------------------------------------------------------------------------------------------------------------------------------------------------------------------------------------------------------------------------------------------------------------------------------------------------------------------------------------------------------------------------------------------------------------------------------------------------------------------------------------------------------------------------------------------------------------------------------------------------------------------------------------------------------------------------------------------------------------------------------------------------------------------------------------------------------------------------------------------------------------------------------------------------------------------------------------------------------------------------------------------------------------------------------------------------------------------------------------------------------------------------------------------------------------------------------------------------------------------------------------------------------------------------------------------------------------------------------------------------------------------------------------------------------------------------------------------------------------------------------------------------------------------------------------------------------------------------------------------------------------------------------------------------------------------------------------------------------------------------------------------------------------------------------------------------------------------------------------------------------------------------------------------------------|------------------------------------------------------------------------------------------------------------------------------------------------------------------------------------------------------------------------------------------------------------------------------------------------------------------------------------------------------------------------------------------------------------------------------------------------------------------------------------------------------------------------------------------------------------------------------------------------------------------------------------------------------------------------------------------------------------------------------------------------------------------------------------------------------------------------------------------------------------------------------------------------------------------------------------------------------------------------------------------------------------------------------------------------------------------------------------------------------------------------------------------------------------------------------------------------------------------------------------------------------------------------------------------------------------------------------------------------------------------------------------------------------------------------------------------------------------------------------------------------------------------------------------------------------------------------------------------------------------------------------------------------------------------------------------------------------------------------------------------------------------------------------------------------------------------------------------------------------------------------------------------------------------------------------------------------------------------------------------------------------------------------------------------------------------------------------------------------------------------------------------------------------------------------------------------------------------------------------------------------------------------------------------------------------------------------------------------------------------------------------------------------------------------------------------------------------------------------------------------------------------------------------------------------------------|

|            |                                                                                                                                                                                                                                                                                                                                                                                                                                                                                                                                                                                                                                                                                                                                                                                                                                                                                                                                                                                                                                                                                                                                                                                                                                                                                                                                                                                                                                                                                                                                                                                                                                                                                                                                                                                                                                                                                                                                                                                                                                                                                                                                                                                                                                                                                                                                                                                                                                                                                                                                                                                                                                                               |                                                                                                                                                                                                                                                                                                                                                                                                                                                                                                                                                                                                                                                                                                                                                                                                                                                                                                                                                                                                                                                                                                                                                                                                                                                                                                                                                                                                                                                                                                                                                                                                                                                                                                                                                                                                                                                                                                                                                                                                                                                                                                                                                                                                                                                                                                                                                                                                                                                                                                                                                                                                                                                           |                                                                                                                                                                                                                                                                                                                                                                                                                                                                                                                                                                                                                                                                                                                                                                                                                                                                                                                                                                                                                                                                                                                                                                                                                                                                                                                                                                                                                                                                                                                                                                                                                                                                                                                                                                                                                                                                                                                                                                                                                                                                                                                                                                                                                                                                                                                                                                                                                                                                                                                                                                                                                                                           |
|------------|---------------------------------------------------------------------------------------------------------------------------------------------------------------------------------------------------------------------------------------------------------------------------------------------------------------------------------------------------------------------------------------------------------------------------------------------------------------------------------------------------------------------------------------------------------------------------------------------------------------------------------------------------------------------------------------------------------------------------------------------------------------------------------------------------------------------------------------------------------------------------------------------------------------------------------------------------------------------------------------------------------------------------------------------------------------------------------------------------------------------------------------------------------------------------------------------------------------------------------------------------------------------------------------------------------------------------------------------------------------------------------------------------------------------------------------------------------------------------------------------------------------------------------------------------------------------------------------------------------------------------------------------------------------------------------------------------------------------------------------------------------------------------------------------------------------------------------------------------------------------------------------------------------------------------------------------------------------------------------------------------------------------------------------------------------------------------------------------------------------------------------------------------------------------------------------------------------------------------------------------------------------------------------------------------------------------------------------------------------------------------------------------------------------------------------------------------------------------------------------------------------------------------------------------------------------------------------------------------------------------------------------------------------------|-----------------------------------------------------------------------------------------------------------------------------------------------------------------------------------------------------------------------------------------------------------------------------------------------------------------------------------------------------------------------------------------------------------------------------------------------------------------------------------------------------------------------------------------------------------------------------------------------------------------------------------------------------------------------------------------------------------------------------------------------------------------------------------------------------------------------------------------------------------------------------------------------------------------------------------------------------------------------------------------------------------------------------------------------------------------------------------------------------------------------------------------------------------------------------------------------------------------------------------------------------------------------------------------------------------------------------------------------------------------------------------------------------------------------------------------------------------------------------------------------------------------------------------------------------------------------------------------------------------------------------------------------------------------------------------------------------------------------------------------------------------------------------------------------------------------------------------------------------------------------------------------------------------------------------------------------------------------------------------------------------------------------------------------------------------------------------------------------------------------------------------------------------------------------------------------------------------------------------------------------------------------------------------------------------------------------------------------------------------------------------------------------------------------------------------------------------------------------------------------------------------------------------------------------------------------------------------------------------------------------------------------------------------|-----------------------------------------------------------------------------------------------------------------------------------------------------------------------------------------------------------------------------------------------------------------------------------------------------------------------------------------------------------------------------------------------------------------------------------------------------------------------------------------------------------------------------------------------------------------------------------------------------------------------------------------------------------------------------------------------------------------------------------------------------------------------------------------------------------------------------------------------------------------------------------------------------------------------------------------------------------------------------------------------------------------------------------------------------------------------------------------------------------------------------------------------------------------------------------------------------------------------------------------------------------------------------------------------------------------------------------------------------------------------------------------------------------------------------------------------------------------------------------------------------------------------------------------------------------------------------------------------------------------------------------------------------------------------------------------------------------------------------------------------------------------------------------------------------------------------------------------------------------------------------------------------------------------------------------------------------------------------------------------------------------------------------------------------------------------------------------------------------------------------------------------------------------------------------------------------------------------------------------------------------------------------------------------------------------------------------------------------------------------------------------------------------------------------------------------------------------------------------------------------------------------------------------------------------------------------------------------------------------------------------------------------------------|
| <p>Q39</p> | <p>The likely diagnosis based on the reported symptoms of rapid onset weight loss, severe thirst, frequent urination, and positive urine dipstick for glycosuria in a patient receiving Ipilimumab is immune-related type 1 diabetes mellitus (T1DM).</p> <p>Ipilimumab is an immune checkpoint inhibitor used in cancer treatment, and it can lead to immune-related adverse events, including endocrine-related complications. Immune-related T1DM is a known adverse event associated with immune checkpoint inhibitors, and it involves the destruction of insulin-producing beta cells in the pancreas due to an autoimmune response.</p> <p>The symptoms reported are consistent with the classic manifestations of T1DM:</p> <ol style="list-style-type: none"> <li>1. Rapid weight loss: Unintentional weight loss is common in T1DM due to the body's inability to use glucose as an energy source.</li> <li>2. Severe thirst (polydipsia): High blood sugar levels lead to increased thirst as the body attempts to dilute the excess glucose.</li> <li>3. Frequent urination (polyuria): Elevated blood sugar levels cause increased urine production, leading to frequent urination.</li> <li>4. Hunger (polyphagia): Despite the increased food intake, T1DM patients experience persistent hunger because glucose cannot enter the cells to provide energy.</li> </ol> <p>The presence of glycosuria, detected through the urine dipstick test, indicates the presence of glucose in the urine. In T1DM, elevated blood glucose levels exceed the renal threshold, causing glucose to spill into the urine.</p> <p>Prompt medical attention is crucial, and the patient should communicate these symptoms to their healthcare provider. The healthcare provider will likely order blood tests, such as fasting glucose and HbA1c levels, to confirm the diagnosis of T1DM.</p> <p>Management of immune-related T1DM typically involves insulin therapy to replace the deficient insulin production. The specific insulin regimen and treatment plan will be determined by the healthcare provider based on the patient's individual needs.</p> <p>It is important to involve the oncologist and an endocrinologist or healthcare team experienced in managing immune-related adverse events to address T1DM and provide appropriate treatment and supportive care.</p> <p>Please note that while I strive to provide accurate and up-to-date information, this response does not replace individualized medical advice. Patients should consult their healthcare provider for an accurate diagnosis and tailored treatment recommendations.</p> | <p>The likely diagnosis based on the reported symptoms of rapid onset weight loss, severe thirst, frequent urination, and positive urine dipstick for glycosuria in a patient receiving Ipilimumab is immune-related type 1 diabetes mellitus (T1DM).</p> <p>Ipilimumab is an immune checkpoint inhibitor used in cancer treatment, and it can lead to immune-related adverse events, including endocrine-related complications. Immune-related T1DM is a known adverse event associated with immune checkpoint inhibitors, and it involves the destruction of insulin-producing beta cells in the pancreas due to an autoimmune response.</p> <p>The symptoms reported are consistent with the classic manifestations of T1DM:</p> <ol style="list-style-type: none"> <li>1. Rapid weight loss: Unintentional weight loss is common in T1DM due to the body's inability to use glucose as an energy source.</li> <li>2. Severe thirst (polydipsia): High blood sugar levels lead to increased thirst as the body attempts to dilute the excess glucose.</li> <li>3. Frequent urination (polyuria): Elevated blood sugar levels cause increased urine production, leading to frequent urination.</li> <li>4. Hunger (polyphagia): Despite increased food intake, T1DM patients experience persistent hunger because glucose cannot enter the cells to provide energy.</li> </ol> <p>The presence of glycosuria, detected through the urine dipstick test, indicates the presence of glucose in the urine. In T1DM, elevated blood glucose levels exceed the renal threshold, causing glucose to spill into the urine.</p> <p>Prompt medical attention is crucial, and the patient should communicate these symptoms to their healthcare provider. The healthcare provider will likely order blood tests, such as fasting glucose and HbA1c levels, to confirm the diagnosis of T1DM.</p> <p>Management of immune-related T1DM typically involves insulin therapy to replace the deficient insulin production. The specific insulin regimen and treatment plan will be determined by the healthcare provider based on the patient's individual needs.</p> <p>It is important to involve the oncologist and an endocrinologist or healthcare team experienced in managing immune-related adverse events to address T1DM and provide appropriate treatment and supportive care.</p> <p>Please note that while I strive to provide accurate and up-to-date information, this response does not replace individualized medical advice. Patients should consult their healthcare provider for an accurate diagnosis and tailored treatment recommendations.</p> | <p>The likely diagnosis based on the reported symptoms of rapid onset weight loss, severe thirst, frequent urination, and positive urine dipstick for glycosuria in a patient receiving Ipilimumab is immune-related type 1 diabetes mellitus (T1DM).</p> <p>Ipilimumab is an immune checkpoint inhibitor used in cancer treatment, and it can lead to immune-related adverse events, including endocrine-related complications. Immune-related T1DM is a known adverse event associated with immune checkpoint inhibitors, and it involves the destruction of insulin-producing beta cells in the pancreas due to an autoimmune response.</p> <p>The symptoms reported are consistent with the classic manifestations of T1DM:</p> <ol style="list-style-type: none"> <li>1. Rapid weight loss: Unintentional weight loss is common in T1DM due to the body's inability to use glucose as an energy source.</li> <li>2. Severe thirst (polydipsia): High blood sugar levels lead to increased thirst as the body attempts to dilute the excess glucose.</li> <li>3. Frequent urination (polyuria): Elevated blood sugar levels cause increased urine production, leading to frequent urination.</li> <li>4. Hunger (polyphagia): Despite increased food intake, T1DM patients experience persistent hunger because glucose cannot enter the cells to provide energy.</li> </ol> <p>The presence of glycosuria, detected through the urine dipstick test, indicates the presence of glucose in the urine. In T1DM, elevated blood glucose levels exceed the renal threshold, causing glucose to spill into the urine.</p> <p>Prompt medical attention is crucial, and the patient should communicate these symptoms to their healthcare provider. The healthcare provider will likely order blood tests, such as fasting glucose and HbA1c levels, to confirm the diagnosis of T1DM.</p> <p>Management of immune-related T1DM typically involves insulin therapy to replace the deficient insulin production. The specific insulin regimen and treatment plan will be determined by the healthcare provider based on the patient's individual needs.</p> <p>It is important to involve the oncologist and an endocrinologist or healthcare team experienced in managing immune-related adverse events to address T1DM and provide appropriate treatment and supportive care.</p> <p>Please note that while I strive to provide accurate and up-to-date information, this response does not replace individualized medical advice. Patients should consult their healthcare provider for an accurate diagnosis and tailored treatment recommendations.</p> |
|------------|---------------------------------------------------------------------------------------------------------------------------------------------------------------------------------------------------------------------------------------------------------------------------------------------------------------------------------------------------------------------------------------------------------------------------------------------------------------------------------------------------------------------------------------------------------------------------------------------------------------------------------------------------------------------------------------------------------------------------------------------------------------------------------------------------------------------------------------------------------------------------------------------------------------------------------------------------------------------------------------------------------------------------------------------------------------------------------------------------------------------------------------------------------------------------------------------------------------------------------------------------------------------------------------------------------------------------------------------------------------------------------------------------------------------------------------------------------------------------------------------------------------------------------------------------------------------------------------------------------------------------------------------------------------------------------------------------------------------------------------------------------------------------------------------------------------------------------------------------------------------------------------------------------------------------------------------------------------------------------------------------------------------------------------------------------------------------------------------------------------------------------------------------------------------------------------------------------------------------------------------------------------------------------------------------------------------------------------------------------------------------------------------------------------------------------------------------------------------------------------------------------------------------------------------------------------------------------------------------------------------------------------------------------------|-----------------------------------------------------------------------------------------------------------------------------------------------------------------------------------------------------------------------------------------------------------------------------------------------------------------------------------------------------------------------------------------------------------------------------------------------------------------------------------------------------------------------------------------------------------------------------------------------------------------------------------------------------------------------------------------------------------------------------------------------------------------------------------------------------------------------------------------------------------------------------------------------------------------------------------------------------------------------------------------------------------------------------------------------------------------------------------------------------------------------------------------------------------------------------------------------------------------------------------------------------------------------------------------------------------------------------------------------------------------------------------------------------------------------------------------------------------------------------------------------------------------------------------------------------------------------------------------------------------------------------------------------------------------------------------------------------------------------------------------------------------------------------------------------------------------------------------------------------------------------------------------------------------------------------------------------------------------------------------------------------------------------------------------------------------------------------------------------------------------------------------------------------------------------------------------------------------------------------------------------------------------------------------------------------------------------------------------------------------------------------------------------------------------------------------------------------------------------------------------------------------------------------------------------------------------------------------------------------------------------------------------------------------|-----------------------------------------------------------------------------------------------------------------------------------------------------------------------------------------------------------------------------------------------------------------------------------------------------------------------------------------------------------------------------------------------------------------------------------------------------------------------------------------------------------------------------------------------------------------------------------------------------------------------------------------------------------------------------------------------------------------------------------------------------------------------------------------------------------------------------------------------------------------------------------------------------------------------------------------------------------------------------------------------------------------------------------------------------------------------------------------------------------------------------------------------------------------------------------------------------------------------------------------------------------------------------------------------------------------------------------------------------------------------------------------------------------------------------------------------------------------------------------------------------------------------------------------------------------------------------------------------------------------------------------------------------------------------------------------------------------------------------------------------------------------------------------------------------------------------------------------------------------------------------------------------------------------------------------------------------------------------------------------------------------------------------------------------------------------------------------------------------------------------------------------------------------------------------------------------------------------------------------------------------------------------------------------------------------------------------------------------------------------------------------------------------------------------------------------------------------------------------------------------------------------------------------------------------------------------------------------------------------------------------------------------------------|



|            |                                                                                                                                                                                                                                                                                                                                                                                                                                                                                                                                                                                                                                                                                                                                                                                                                                                                                                                                                                                                                                                                                                                                                                                                                                                                                                                                                                                                                                                                                                                                                                                                                                                                                                                                                                                                                                                                                                                                                                                                                                                                    |                                                                                                                                                                                                                                                                                                                                                                                                                                                                                                                                                                                                                                                                                                                                                                                                                                                                                                                                                                                                                                                                                                                                                                                                                                                                                                                                                                                                                                                                                                                                                                                                                                                                                                                                                                                                                                                                                                                                                                                                                                                    |                                                                                                                                                                                                                                                                                                                                                                                                                                                                                                                                                                                                                                                                                                                                                                                                                                                                                                                                                                                                                                                                                                                                                                                                                                                                                                                                                                                                                                                                                                                                                                                                                                                                                                                                                                                                                                                                                                                                                                                                                                                                                                                   |
|------------|--------------------------------------------------------------------------------------------------------------------------------------------------------------------------------------------------------------------------------------------------------------------------------------------------------------------------------------------------------------------------------------------------------------------------------------------------------------------------------------------------------------------------------------------------------------------------------------------------------------------------------------------------------------------------------------------------------------------------------------------------------------------------------------------------------------------------------------------------------------------------------------------------------------------------------------------------------------------------------------------------------------------------------------------------------------------------------------------------------------------------------------------------------------------------------------------------------------------------------------------------------------------------------------------------------------------------------------------------------------------------------------------------------------------------------------------------------------------------------------------------------------------------------------------------------------------------------------------------------------------------------------------------------------------------------------------------------------------------------------------------------------------------------------------------------------------------------------------------------------------------------------------------------------------------------------------------------------------------------------------------------------------------------------------------------------------|----------------------------------------------------------------------------------------------------------------------------------------------------------------------------------------------------------------------------------------------------------------------------------------------------------------------------------------------------------------------------------------------------------------------------------------------------------------------------------------------------------------------------------------------------------------------------------------------------------------------------------------------------------------------------------------------------------------------------------------------------------------------------------------------------------------------------------------------------------------------------------------------------------------------------------------------------------------------------------------------------------------------------------------------------------------------------------------------------------------------------------------------------------------------------------------------------------------------------------------------------------------------------------------------------------------------------------------------------------------------------------------------------------------------------------------------------------------------------------------------------------------------------------------------------------------------------------------------------------------------------------------------------------------------------------------------------------------------------------------------------------------------------------------------------------------------------------------------------------------------------------------------------------------------------------------------------------------------------------------------------------------------------------------------------|-------------------------------------------------------------------------------------------------------------------------------------------------------------------------------------------------------------------------------------------------------------------------------------------------------------------------------------------------------------------------------------------------------------------------------------------------------------------------------------------------------------------------------------------------------------------------------------------------------------------------------------------------------------------------------------------------------------------------------------------------------------------------------------------------------------------------------------------------------------------------------------------------------------------------------------------------------------------------------------------------------------------------------------------------------------------------------------------------------------------------------------------------------------------------------------------------------------------------------------------------------------------------------------------------------------------------------------------------------------------------------------------------------------------------------------------------------------------------------------------------------------------------------------------------------------------------------------------------------------------------------------------------------------------------------------------------------------------------------------------------------------------------------------------------------------------------------------------------------------------------------------------------------------------------------------------------------------------------------------------------------------------------------------------------------------------------------------------------------------------|
| <p>Q40</p> | <p>If a patient with biopsy-proven grade three colitis due to Nivolumab has completed three days of methylprednisolone without significant improvement, the next line of therapy would typically involve escalating immunosuppressive treatment. In such cases, the following options may be considered:</p> <ol style="list-style-type: none"> <li>1. Infiximab: Infiximab, a monoclonal antibody that targets tumor necrosis factor-alpha (TNF-alpha), can be effective in managing immune-related colitis. It is often considered as a second-line treatment for severe or refractory cases. Infiximab is typically administered as an intravenous infusion.</li> <li>2. Vedolizumab: Vedolizumab is an integrin receptor antagonist that specifically targets gut inflammation. It can be considered as an alternative to infiximab in cases where TNF-alpha inhibitors are contraindicated or not effective.</li> <li>3. Other immunosuppressive agents: In some cases, other immunosuppressive agents such as mycophenolate mofetil, tacrolimus, or cyclosporine may be used, particularly if TNF-alpha inhibitors are not an option or have failed.</li> </ol> <p>The choice of next-line therapy depends on various factors, including the severity of the colitis, the patient's overall health, and the individual response to treatment. The decision should be made in consultation with a gastroenterologist or an appropriate healthcare provider experienced in managing immune-related adverse events.</p> <p>It is crucial to closely monitor the patient's condition and ensure ongoing communication with the healthcare team to guide treatment decisions and optimize care. Prompt intervention is important to prevent complications and provide the best possible outcome for the patient.</p> <p>Please note that this response provides general information and should not replace individualized medical advice. Patients should consult their healthcare provider for an accurate diagnosis and tailored treatment recommendations.</p> | <p>If a patient with biopsy-proven grade three colitis due to Nivolumab has completed three days of methylprednisolone without significant improvement, the next line of therapy would typically involve escalating immunosuppressive treatment. In such cases, the following options may be considered:</p> <ol style="list-style-type: none"> <li>1. Infiximab: Infiximab, a monoclonal antibody that targets tumor necrosis factor-alpha (TNF-alpha), is commonly used as a second-line treatment for severe or refractory immune-related colitis. It is administered intravenously and has shown efficacy in managing immune-related gastrointestinal toxicity.</li> <li>2. Vedolizumab: Vedolizumab is an integrin receptor antagonist that selectively targets gut inflammation. It can be considered as an alternative to infiximab, particularly if TNF-alpha inhibitors are contraindicated or not effective.</li> <li>3. Calcineurin inhibitors: Medications such as tacrolimus or cyclosporine, which act as calcineurin inhibitors, can be considered in cases of severe or refractory colitis. These medications help suppress the immune response and reduce inflammation.</li> </ol> <p>The choice of next-line therapy depends on various factors, including the severity of the colitis, the patient's overall health, and the individual response to treatment. It is crucial to involve a gastroenterologist or an appropriate healthcare provider experienced in managing immune-related adverse events to guide treatment decisions.</p> <p>Regular monitoring and close communication with the healthcare team are important to assess the patient's response to treatment, manage any potential complications, and provide optimal care.</p> <p>Please note that this response provides general information and should not replace individualized medical advice. Patients should consult their healthcare provider for an accurate diagnosis and tailored treatment recommendations based on their specific situation.</p> | <p>If a patient with biopsy-proven grade three colitis due to Nivolumab has completed three days of methylprednisolone without significant improvement, the next line of therapy would typically involve further escalation of immunosuppressive treatment. In such cases, the following options may be considered:</p> <ol style="list-style-type: none"> <li>1. Infiximab: Infiximab, a monoclonal antibody that targets tumor necrosis factor-alpha (TNF-alpha), is commonly used as a second-line treatment for severe or refractory immune-related colitis. It has shown efficacy in managing immune-related gastrointestinal toxicity. Infiximab is typically administered as an intravenous infusion.</li> <li>2. Vedolizumab: Vedolizumab is an integrin receptor antagonist that specifically targets gut inflammation. It can be considered as an alternative to infiximab in cases where TNF-alpha inhibitors are contraindicated or if there is no response to infiximab.</li> <li>3. Other immunosuppressive agents: In some cases, other immunosuppressive agents such as mycophenolate mofetil, tacrolimus, or cyclosporine may be used, particularly if TNF-alpha inhibitors are not an option or have failed.</li> </ol> <p>The choice of next-line therapy depends on various factors, including the severity of the colitis, the patient's overall health, and the individual response to treatment. The decision should be made in consultation with a gastroenterologist or an appropriate healthcare provider experienced in managing immune-related adverse events.</p> <p>Close monitoring of the patient's condition and regular communication with the healthcare team are crucial to guide treatment decisions, monitor for potential complications, and optimize care.</p> <p>Please note that while I strive to provide accurate and up-to-date information, this response does not replace individualized medical advice. Patients should consult their healthcare provider for an accurate diagnosis and tailored treatment recommendations based on their specific situation.</p> |
|------------|--------------------------------------------------------------------------------------------------------------------------------------------------------------------------------------------------------------------------------------------------------------------------------------------------------------------------------------------------------------------------------------------------------------------------------------------------------------------------------------------------------------------------------------------------------------------------------------------------------------------------------------------------------------------------------------------------------------------------------------------------------------------------------------------------------------------------------------------------------------------------------------------------------------------------------------------------------------------------------------------------------------------------------------------------------------------------------------------------------------------------------------------------------------------------------------------------------------------------------------------------------------------------------------------------------------------------------------------------------------------------------------------------------------------------------------------------------------------------------------------------------------------------------------------------------------------------------------------------------------------------------------------------------------------------------------------------------------------------------------------------------------------------------------------------------------------------------------------------------------------------------------------------------------------------------------------------------------------------------------------------------------------------------------------------------------------|----------------------------------------------------------------------------------------------------------------------------------------------------------------------------------------------------------------------------------------------------------------------------------------------------------------------------------------------------------------------------------------------------------------------------------------------------------------------------------------------------------------------------------------------------------------------------------------------------------------------------------------------------------------------------------------------------------------------------------------------------------------------------------------------------------------------------------------------------------------------------------------------------------------------------------------------------------------------------------------------------------------------------------------------------------------------------------------------------------------------------------------------------------------------------------------------------------------------------------------------------------------------------------------------------------------------------------------------------------------------------------------------------------------------------------------------------------------------------------------------------------------------------------------------------------------------------------------------------------------------------------------------------------------------------------------------------------------------------------------------------------------------------------------------------------------------------------------------------------------------------------------------------------------------------------------------------------------------------------------------------------------------------------------------------|-------------------------------------------------------------------------------------------------------------------------------------------------------------------------------------------------------------------------------------------------------------------------------------------------------------------------------------------------------------------------------------------------------------------------------------------------------------------------------------------------------------------------------------------------------------------------------------------------------------------------------------------------------------------------------------------------------------------------------------------------------------------------------------------------------------------------------------------------------------------------------------------------------------------------------------------------------------------------------------------------------------------------------------------------------------------------------------------------------------------------------------------------------------------------------------------------------------------------------------------------------------------------------------------------------------------------------------------------------------------------------------------------------------------------------------------------------------------------------------------------------------------------------------------------------------------------------------------------------------------------------------------------------------------------------------------------------------------------------------------------------------------------------------------------------------------------------------------------------------------------------------------------------------------------------------------------------------------------------------------------------------------------------------------------------------------------------------------------------------------|

|            |                                                                                                                                                                                                                                                                                                                                                                                                                                                                                                                                                                                                                                                                                                                                                                                                                                                                                                                                                                                                                                                                                                                                                                                                                                                                                                                                                                                                                                                                                                                                                                                                                                                                                                                                                                                                                                                                                                                                                                                                                                                                                                                                                                                                                                                                                                                                                                                                                                                                                                                                                                                                                                                                                                                                                                                                                                                                                       |                                                                                                                                                                                                                                                                                                                                                                                                                                                                                                                                                                                                                                                                                                                                                                                                                                                                                                                                                                                                                                                                                                                                                                                                                                                                                                                                                                                                                                                                                                                                                                                                                                                                                                                                                                                                                                                                                                                                                                                                                                                                                                                                                                                                                                                                                                                                                                                                                                                                                                                                                                                                                                                                                                                                                                                                                                                                                   |                                                                                                                                                                                                                                                                                                                                                                                                                                                                                                                                                                                                                                                                                                                                                                                                                                                                                                                                                                                                                                                                                                                                                                                                                                                                                                                                                                                                                                                                                                                                                                                                                                                                                                                                                                                                                                                                                                                                                                                                                                                                                                                                                                                                                                                                                                                                                                                                                                                                                                                                                                                                                                                                                                                                                                                                                                                                                                                                                       |
|------------|---------------------------------------------------------------------------------------------------------------------------------------------------------------------------------------------------------------------------------------------------------------------------------------------------------------------------------------------------------------------------------------------------------------------------------------------------------------------------------------------------------------------------------------------------------------------------------------------------------------------------------------------------------------------------------------------------------------------------------------------------------------------------------------------------------------------------------------------------------------------------------------------------------------------------------------------------------------------------------------------------------------------------------------------------------------------------------------------------------------------------------------------------------------------------------------------------------------------------------------------------------------------------------------------------------------------------------------------------------------------------------------------------------------------------------------------------------------------------------------------------------------------------------------------------------------------------------------------------------------------------------------------------------------------------------------------------------------------------------------------------------------------------------------------------------------------------------------------------------------------------------------------------------------------------------------------------------------------------------------------------------------------------------------------------------------------------------------------------------------------------------------------------------------------------------------------------------------------------------------------------------------------------------------------------------------------------------------------------------------------------------------------------------------------------------------------------------------------------------------------------------------------------------------------------------------------------------------------------------------------------------------------------------------------------------------------------------------------------------------------------------------------------------------------------------------------------------------------------------------------------------------|-----------------------------------------------------------------------------------------------------------------------------------------------------------------------------------------------------------------------------------------------------------------------------------------------------------------------------------------------------------------------------------------------------------------------------------------------------------------------------------------------------------------------------------------------------------------------------------------------------------------------------------------------------------------------------------------------------------------------------------------------------------------------------------------------------------------------------------------------------------------------------------------------------------------------------------------------------------------------------------------------------------------------------------------------------------------------------------------------------------------------------------------------------------------------------------------------------------------------------------------------------------------------------------------------------------------------------------------------------------------------------------------------------------------------------------------------------------------------------------------------------------------------------------------------------------------------------------------------------------------------------------------------------------------------------------------------------------------------------------------------------------------------------------------------------------------------------------------------------------------------------------------------------------------------------------------------------------------------------------------------------------------------------------------------------------------------------------------------------------------------------------------------------------------------------------------------------------------------------------------------------------------------------------------------------------------------------------------------------------------------------------------------------------------------------------------------------------------------------------------------------------------------------------------------------------------------------------------------------------------------------------------------------------------------------------------------------------------------------------------------------------------------------------------------------------------------------------------------------------------------------------|-------------------------------------------------------------------------------------------------------------------------------------------------------------------------------------------------------------------------------------------------------------------------------------------------------------------------------------------------------------------------------------------------------------------------------------------------------------------------------------------------------------------------------------------------------------------------------------------------------------------------------------------------------------------------------------------------------------------------------------------------------------------------------------------------------------------------------------------------------------------------------------------------------------------------------------------------------------------------------------------------------------------------------------------------------------------------------------------------------------------------------------------------------------------------------------------------------------------------------------------------------------------------------------------------------------------------------------------------------------------------------------------------------------------------------------------------------------------------------------------------------------------------------------------------------------------------------------------------------------------------------------------------------------------------------------------------------------------------------------------------------------------------------------------------------------------------------------------------------------------------------------------------------------------------------------------------------------------------------------------------------------------------------------------------------------------------------------------------------------------------------------------------------------------------------------------------------------------------------------------------------------------------------------------------------------------------------------------------------------------------------------------------------------------------------------------------------------------------------------------------------------------------------------------------------------------------------------------------------------------------------------------------------------------------------------------------------------------------------------------------------------------------------------------------------------------------------------------------------------------------------------------------------------------------------------------------------|
| <p>Q41</p> | <p>Persistent diarrhea in a patient receiving Nivolumab and Cabozantinib for kidney cancer requires prompt evaluation and management. Diarrhea is a common side effect of these medications, and it is important to address it to prevent complications such as dehydration and electrolyte imbalances. Here are some management strategies that may be considered:</p> <ol style="list-style-type: none"> <li>1. Contact the healthcare provider: Inform the healthcare provider about the persistent diarrhea and provide details on the frequency and consistency of bowel movements. They will evaluate the severity and potential causes to guide further management.</li> <li>2. Supportive care: Ensure adequate hydration by drinking plenty of fluids to replace the fluids lost through diarrhea. Oral rehydration solutions or electrolyte-rich drinks can be helpful in maintaining hydration and electrolyte balance. Avoid caffeine, alcohol, and spicy or greasy foods that may worsen diarrhea.</li> <li>3. Anti-diarrheal medications: Depending on the severity of the diarrhea, the healthcare provider may recommend over-the-counter anti-diarrheal medications such as loperamide. However, it is important to consult with the healthcare provider before taking any medications to ensure they are safe and appropriate in the given situation.</li> <li>4. Review medications: The healthcare provider may assess the patient's current medications, including Nivolumab and Cabozantinib, to determine if any adjustments or temporary discontinuation is necessary. The dosage or schedule of these medications may need to be modified to manage the diarrhea.</li> <li>5. Investigate potential causes: The healthcare provider may order additional tests or investigations, such as stool studies, to identify any infectious causes or other factors contributing to the persistent diarrhea.</li> <li>6. Consultation with a gastroenterologist: In some cases, referral to a gastroenterologist may be considered, especially if the diarrhea is severe or persists despite initial management attempts. A gastroenterologist can provide specialized evaluation and management options for refractory cases.</li> </ol> <p>It is important to maintain open communication with the healthcare provider to ensure appropriate management of persistent diarrhea. They will be best positioned to assess the individual situation, consider potential contributing factors, and provide personalized recommendations for the patient.</p> <p>Please note that while I strive to provide accurate and up-to-date information, this response does not replace individualized medical advice. Patients should consult their healthcare provider for an accurate diagnosis and tailored treatment recommendations based on their specific situation.</p> | <p>Persistent diarrhea in a patient receiving Nivolumab and Cabozantinib for kidney cancer requires prompt evaluation and management. Diarrhea is a known side effect of these medications, and addressing it is important to prevent complications such as dehydration and electrolyte imbalances. Here are some management strategies that may be considered:</p> <ol style="list-style-type: none"> <li>1. Contact the healthcare provider: Inform the healthcare provider about the persistent diarrhea and provide details on the frequency and consistency of bowel movements. They will evaluate the severity and potential causes to guide further management.</li> <li>2. Supportive care: Ensure adequate hydration by drinking plenty of fluids to replace the fluids lost through diarrhea. Oral rehydration solutions or electrolyte-rich drinks can be helpful in maintaining hydration and electrolyte balance. Avoid caffeine, alcohol, and spicy or greasy foods that may worsen diarrhea.</li> <li>3. Anti-diarrheal medications: Depending on the severity of the diarrhea, the healthcare provider may recommend over-the-counter anti-diarrheal medications such as loperamide. However, it is important to consult with the healthcare provider before taking any medications to ensure they are safe and appropriate in the given situation.</li> <li>4. Review medications: The healthcare provider may assess the patient's current medications, including Nivolumab and Cabozantinib, to determine if any adjustments or temporary discontinuation is necessary. The dosage or schedule of these medications may need to be modified to manage the diarrhea.</li> <li>5. Investigate potential causes: The healthcare provider may order additional tests or investigations, such as stool studies, to identify any infectious causes or other factors contributing to the persistent diarrhea.</li> <li>6. Consultation with a gastroenterologist: In some cases, referral to a gastroenterologist may be considered, especially if the diarrhea is severe or persists despite initial management attempts. A gastroenterologist can provide specialized evaluation and management options for refractory cases.</li> </ol> <p>It is important to maintain open communication with the healthcare provider to ensure appropriate management of persistent diarrhea. They will be best positioned to assess the individual situation, consider potential contributing factors, and provide personalized recommendations for the patient.</p> <p>Please note that while I strive to provide accurate and up-to-date information, this response does not replace individualized medical advice. Patients should consult their healthcare provider for an accurate diagnosis and tailored treatment recommendations based on their specific situation.</p> | <p>Persistent diarrhea in a patient receiving Nivolumab and Cabozantinib for kidney cancer requires careful management to alleviate symptoms and prevent complications. Here are some strategies that may be considered:</p> <ol style="list-style-type: none"> <li>1. Contact the healthcare provider: Inform the healthcare provider about the persistent diarrhea and provide details on the frequency and consistency of bowel movements. They will assess the severity and potential causes to guide further management.</li> <li>2. Supportive care: Ensure adequate hydration by drinking plenty of fluids to replace the fluids lost through diarrhea. Oral rehydration solutions or electrolyte-rich drinks can help maintain hydration and electrolyte balance. Avoid caffeine, alcohol, and spicy or greasy foods that may worsen diarrhea.</li> <li>3. Anti-diarrheal medications: Depending on the severity of the diarrhea, the healthcare provider may recommend over-the-counter anti-diarrheal medications such as loperamide. However, it is important to consult with the healthcare provider before taking any medications to ensure they are safe and appropriate in the given situation.</li> <li>4. Medication adjustment: The healthcare provider may consider adjusting the dose or schedule of Nivolumab or Cabozantinib to help manage the diarrhea. Temporary discontinuation or dose modification may be necessary to alleviate symptoms.</li> <li>5. Evaluation for infectious causes: The healthcare provider may order stool tests to rule out infectious causes of the diarrhea, such as bacterial, viral, or parasitic infections. If an infectious cause is identified, appropriate treatment will be initiated.</li> <li>6. Consultation with a gastroenterologist: If the diarrhea persists or worsens despite initial management attempts, a referral to a gastroenterologist may be considered. They can provide specialized evaluation and management options for refractory cases.</li> <li>7. Dietary modifications: The healthcare provider or a registered dietitian may provide guidance on dietary changes that can help manage diarrhea. This may include avoiding certain foods known to exacerbate symptoms, such as high-fiber foods, spicy foods, or foods that are difficult to digest.</li> </ol> <p>Close communication with the healthcare provider is crucial to monitor the patient's condition, adjust treatment as needed, and ensure optimal management of the diarrhea. They will consider the individual patient's situation and tailor the management plan accordingly.</p> <p>Please note that while I strive to provide accurate and up-to-date information, this response does not replace individualized medical advice. Patients should consult their healthcare provider for an accurate diagnosis and tailored treatment recommendations based on their specific situation.</p> |
|------------|---------------------------------------------------------------------------------------------------------------------------------------------------------------------------------------------------------------------------------------------------------------------------------------------------------------------------------------------------------------------------------------------------------------------------------------------------------------------------------------------------------------------------------------------------------------------------------------------------------------------------------------------------------------------------------------------------------------------------------------------------------------------------------------------------------------------------------------------------------------------------------------------------------------------------------------------------------------------------------------------------------------------------------------------------------------------------------------------------------------------------------------------------------------------------------------------------------------------------------------------------------------------------------------------------------------------------------------------------------------------------------------------------------------------------------------------------------------------------------------------------------------------------------------------------------------------------------------------------------------------------------------------------------------------------------------------------------------------------------------------------------------------------------------------------------------------------------------------------------------------------------------------------------------------------------------------------------------------------------------------------------------------------------------------------------------------------------------------------------------------------------------------------------------------------------------------------------------------------------------------------------------------------------------------------------------------------------------------------------------------------------------------------------------------------------------------------------------------------------------------------------------------------------------------------------------------------------------------------------------------------------------------------------------------------------------------------------------------------------------------------------------------------------------------------------------------------------------------------------------------------------------|-----------------------------------------------------------------------------------------------------------------------------------------------------------------------------------------------------------------------------------------------------------------------------------------------------------------------------------------------------------------------------------------------------------------------------------------------------------------------------------------------------------------------------------------------------------------------------------------------------------------------------------------------------------------------------------------------------------------------------------------------------------------------------------------------------------------------------------------------------------------------------------------------------------------------------------------------------------------------------------------------------------------------------------------------------------------------------------------------------------------------------------------------------------------------------------------------------------------------------------------------------------------------------------------------------------------------------------------------------------------------------------------------------------------------------------------------------------------------------------------------------------------------------------------------------------------------------------------------------------------------------------------------------------------------------------------------------------------------------------------------------------------------------------------------------------------------------------------------------------------------------------------------------------------------------------------------------------------------------------------------------------------------------------------------------------------------------------------------------------------------------------------------------------------------------------------------------------------------------------------------------------------------------------------------------------------------------------------------------------------------------------------------------------------------------------------------------------------------------------------------------------------------------------------------------------------------------------------------------------------------------------------------------------------------------------------------------------------------------------------------------------------------------------------------------------------------------------------------------------------------------------|-------------------------------------------------------------------------------------------------------------------------------------------------------------------------------------------------------------------------------------------------------------------------------------------------------------------------------------------------------------------------------------------------------------------------------------------------------------------------------------------------------------------------------------------------------------------------------------------------------------------------------------------------------------------------------------------------------------------------------------------------------------------------------------------------------------------------------------------------------------------------------------------------------------------------------------------------------------------------------------------------------------------------------------------------------------------------------------------------------------------------------------------------------------------------------------------------------------------------------------------------------------------------------------------------------------------------------------------------------------------------------------------------------------------------------------------------------------------------------------------------------------------------------------------------------------------------------------------------------------------------------------------------------------------------------------------------------------------------------------------------------------------------------------------------------------------------------------------------------------------------------------------------------------------------------------------------------------------------------------------------------------------------------------------------------------------------------------------------------------------------------------------------------------------------------------------------------------------------------------------------------------------------------------------------------------------------------------------------------------------------------------------------------------------------------------------------------------------------------------------------------------------------------------------------------------------------------------------------------------------------------------------------------------------------------------------------------------------------------------------------------------------------------------------------------------------------------------------------------------------------------------------------------------------------------------------------------|

|            |                                                                                                                                                                                                                                                                                                                                                                                                                                                                                                                                                                                                                                                                                                                                                                                                                                                                                                                                                                                                                                                                                                                                                                                                                                                                                                                                                                                                                                                                                                                                                                                                                                                                                                                                                                                                                                                                                                                                                                                                                                                                                                                                                                                                                                                                                                                                                                                                                                                                                                                                                                                                                                                                                                                                                                                                                                                                    |                                                                                                                                                                                                                                                                                                                                                                                                                                                                                                                                                                                                                                                                                                                                                                                                                                                                                                                                                                                                                                                                                                                                                                                                                                                                                                                                                                                                                                                                                                                                                                                                                                                                                                                                                                                                                                                                                                                                                                                                                                                                                                                                                                                                                                                                                                                                                                                                                                                                                                                                                                                                                      |                                                                                                                                                                                                                                                                                                                                                                                                                                                                                                                                                                                                                                                                                                                                                                                                                                                                                                                                                                                                                                                                                                                                                                                                                                                                                                                                                                                                                                                                                                                                                                                                                                                                                                                                                                                                                                                                                                                                                                                                                                                                                                                                                                                                                                                                                                                                                                                                                                                                                                                                                                                                          |
|------------|--------------------------------------------------------------------------------------------------------------------------------------------------------------------------------------------------------------------------------------------------------------------------------------------------------------------------------------------------------------------------------------------------------------------------------------------------------------------------------------------------------------------------------------------------------------------------------------------------------------------------------------------------------------------------------------------------------------------------------------------------------------------------------------------------------------------------------------------------------------------------------------------------------------------------------------------------------------------------------------------------------------------------------------------------------------------------------------------------------------------------------------------------------------------------------------------------------------------------------------------------------------------------------------------------------------------------------------------------------------------------------------------------------------------------------------------------------------------------------------------------------------------------------------------------------------------------------------------------------------------------------------------------------------------------------------------------------------------------------------------------------------------------------------------------------------------------------------------------------------------------------------------------------------------------------------------------------------------------------------------------------------------------------------------------------------------------------------------------------------------------------------------------------------------------------------------------------------------------------------------------------------------------------------------------------------------------------------------------------------------------------------------------------------------------------------------------------------------------------------------------------------------------------------------------------------------------------------------------------------------------------------------------------------------------------------------------------------------------------------------------------------------------------------------------------------------------------------------------------------------|----------------------------------------------------------------------------------------------------------------------------------------------------------------------------------------------------------------------------------------------------------------------------------------------------------------------------------------------------------------------------------------------------------------------------------------------------------------------------------------------------------------------------------------------------------------------------------------------------------------------------------------------------------------------------------------------------------------------------------------------------------------------------------------------------------------------------------------------------------------------------------------------------------------------------------------------------------------------------------------------------------------------------------------------------------------------------------------------------------------------------------------------------------------------------------------------------------------------------------------------------------------------------------------------------------------------------------------------------------------------------------------------------------------------------------------------------------------------------------------------------------------------------------------------------------------------------------------------------------------------------------------------------------------------------------------------------------------------------------------------------------------------------------------------------------------------------------------------------------------------------------------------------------------------------------------------------------------------------------------------------------------------------------------------------------------------------------------------------------------------------------------------------------------------------------------------------------------------------------------------------------------------------------------------------------------------------------------------------------------------------------------------------------------------------------------------------------------------------------------------------------------------------------------------------------------------------------------------------------------------|----------------------------------------------------------------------------------------------------------------------------------------------------------------------------------------------------------------------------------------------------------------------------------------------------------------------------------------------------------------------------------------------------------------------------------------------------------------------------------------------------------------------------------------------------------------------------------------------------------------------------------------------------------------------------------------------------------------------------------------------------------------------------------------------------------------------------------------------------------------------------------------------------------------------------------------------------------------------------------------------------------------------------------------------------------------------------------------------------------------------------------------------------------------------------------------------------------------------------------------------------------------------------------------------------------------------------------------------------------------------------------------------------------------------------------------------------------------------------------------------------------------------------------------------------------------------------------------------------------------------------------------------------------------------------------------------------------------------------------------------------------------------------------------------------------------------------------------------------------------------------------------------------------------------------------------------------------------------------------------------------------------------------------------------------------------------------------------------------------------------------------------------------------------------------------------------------------------------------------------------------------------------------------------------------------------------------------------------------------------------------------------------------------------------------------------------------------------------------------------------------------------------------------------------------------------------------------------------------------|
| <p>Q42</p> | <p>The likely pathology in a patient receiving Pembrolizumab for tonsillar cancer, which was previously treated with chemoradiotherapy, who develops pain, erythema, mucositis, and difficulty swallowing in the previous radiation port is radiation-induced mucositis.</p> <p>Radiation-induced mucositis is a common complication of radiation therapy. It occurs due to damage to the mucous membranes lining the digestive tract, including the throat (oropharynx) in the case of tonsillar cancer treatment. The symptoms described, such as pain, erythema (redness), mucositis (inflammation of the mucous membranes), and difficulty swallowing, are characteristic of radiation-induced mucositis.</p> <p>Radiation therapy damages the rapidly dividing cells within the radiation field, including the normal tissues. The lining of the throat can be particularly sensitive to radiation, leading to inflammation and discomfort. The severity of mucositis can vary depending on factors such as the dose and duration of radiation therapy, individual susceptibility, and concurrent treatments.</p> <p>Management of radiation-induced mucositis typically involves supportive care to alleviate symptoms and promote healing. This may include:</p> <ol style="list-style-type: none"> <li>1. Pain management: Medications such as analgesics or topical anesthetics can help relieve pain. Your healthcare provider may prescribe appropriate pain relief measures based on the severity of symptoms.</li> <li>2. Oral hygiene: Maintaining good oral hygiene is important to prevent secondary infections. Gentle brushing with a soft toothbrush and rinsing with saline or prescribed mouthwashes can help.</li> <li>3. Topical treatments: Medications or mouth rinses containing analgesics, anesthetics, or protective agents may be recommended to soothe the affected area and promote healing.</li> <li>4. Nutritional support: If swallowing difficulties persist, the healthcare provider may recommend dietary modifications or provide nutritional support, such as liquid supplements or a temporary feeding tube, to ensure adequate nutrition.</li> </ol> <p>It is important to communicate these symptoms to the healthcare provider promptly for proper evaluation and management. They may need to examine the area and may consider additional interventions or refer you to a specialist, such as a radiation oncologist or a head and neck specialist, for further evaluation or treatment if necessary.</p> <p>Please note that while I strive to provide accurate and up-to-date information, this response does not replace individualized medical advice. Patients should consult their healthcare provider for an accurate diagnosis and tailored treatment recommendations based on their specific situation.</p> | <p>The likely pathology in a patient receiving Pembrolizumab for tonsillar cancer, which was previously treated with chemoradiotherapy, who develops pain, erythema, mucositis, and difficulty swallowing in the previous radiation port is radiation-induced mucositis.</p> <p>Radiation-induced mucositis is a common complication of radiation therapy, especially in areas where the radiation was administered. In this case, the previous radiation port in the throat (oropharynx) is affected, leading to the symptoms described.</p> <p>During radiation therapy, the normal cells in the radiation field, including the mucous membranes, can be damaged. This can result in inflammation, erythema (redness), pain, and mucositis (inflammation of the mucous membranes). Difficulty swallowing, also known as dysphagia, can occur due to the inflammation and swelling in the oropharynx.</p> <p>Management of radiation-induced mucositis typically involves supportive care to alleviate symptoms and promote healing. This may include:</p> <ol style="list-style-type: none"> <li>1. Pain management: Medications, such as analgesics or topical anesthetics, can be used to relieve pain and discomfort.</li> <li>2. Oral hygiene: Maintaining good oral hygiene is essential to prevent secondary infections. Gentle brushing with a soft toothbrush, using alcohol-free mouth rinses, and keeping the mouth clean can help.</li> <li>3. Topical treatments: Topical solutions, gels, or mouthwashes containing analgesics, anesthetics, or mucosal protective agents may be prescribed to soothe the affected area and promote healing.</li> <li>4. Nutritional support: If swallowing difficulties persist, a healthcare provider may recommend dietary modifications, such as consuming soft or liquid foods, or may provide nutritional supplements to ensure adequate nutrition.</li> </ol> <p>It is important to communicate these symptoms to the healthcare provider promptly for evaluation and management. The healthcare provider may need to examine the affected area and may consider additional interventions or refer the patient to a specialist, such as a radiation oncologist or a head and neck specialist, for further evaluation or treatment if necessary.</p> <p>Please note that while I strive to provide accurate and up-to-date information, this response does not replace individualized medical advice. Patients should consult their healthcare provider for an accurate diagnosis and tailored treatment recommendations based on their specific situation.</p> | <p>The likely pathology in a patient receiving Pembrolizumab for tonsillar cancer, which was previously treated with chemoradiotherapy, who develops pain, erythema, mucositis, and difficulty swallowing in the previous radiation port is radiation-induced mucositis.</p> <p>Radiation-induced mucositis is a well-known complication of radiation therapy, particularly in the area that was treated. In this case, the previous radiation port in the throat (oropharynx) is affected, resulting in the described symptoms.</p> <p>Radiation therapy damages the rapidly dividing cells in the radiation field, including the mucous membranes lining the throat. This damage leads to inflammation, erythema (redness), and mucositis (inflammation of the mucous membranes). Difficulty swallowing, or dysphagia, can occur due to the inflammation and swelling in the oropharynx.</p> <p>Management of radiation-induced mucositis typically involves supportive care to alleviate symptoms and promote healing. Some approaches that may be considered include:</p> <ol style="list-style-type: none"> <li>1. Pain management: Medications, such as analgesics or topical anesthetics, can be prescribed to help relieve pain and discomfort.</li> <li>2. Oral hygiene: Maintaining good oral hygiene is crucial to prevent secondary infections. Gentle brushing with a soft toothbrush, using mouth rinses as recommended, and keeping the mouth clean can help.</li> <li>3. Topical treatments: Topical solutions or gels that contain analgesics, anesthetics, or protective agents may be prescribed to soothe the affected area and promote healing.</li> <li>4. Nutritional support: If difficulty swallowing persists, the healthcare provider may suggest dietary modifications, such as consuming soft or liquid foods, or may provide nutritional supplements to ensure adequate nutrition.</li> </ol> <p>Prompt communication with the healthcare provider is essential to evaluate and manage the symptoms effectively. The healthcare provider may examine the affected area and consider additional interventions or consult with a specialist, such as a radiation oncologist or a head and neck specialist, for further evaluation or treatment, if necessary.</p> <p>Please note that while I strive to provide accurate and up-to-date information, this response does not replace individualized medical advice. Patients should consult their healthcare provider for an accurate diagnosis and tailored treatment recommendations based on their specific situation.</p> |
|------------|--------------------------------------------------------------------------------------------------------------------------------------------------------------------------------------------------------------------------------------------------------------------------------------------------------------------------------------------------------------------------------------------------------------------------------------------------------------------------------------------------------------------------------------------------------------------------------------------------------------------------------------------------------------------------------------------------------------------------------------------------------------------------------------------------------------------------------------------------------------------------------------------------------------------------------------------------------------------------------------------------------------------------------------------------------------------------------------------------------------------------------------------------------------------------------------------------------------------------------------------------------------------------------------------------------------------------------------------------------------------------------------------------------------------------------------------------------------------------------------------------------------------------------------------------------------------------------------------------------------------------------------------------------------------------------------------------------------------------------------------------------------------------------------------------------------------------------------------------------------------------------------------------------------------------------------------------------------------------------------------------------------------------------------------------------------------------------------------------------------------------------------------------------------------------------------------------------------------------------------------------------------------------------------------------------------------------------------------------------------------------------------------------------------------------------------------------------------------------------------------------------------------------------------------------------------------------------------------------------------------------------------------------------------------------------------------------------------------------------------------------------------------------------------------------------------------------------------------------------------------|----------------------------------------------------------------------------------------------------------------------------------------------------------------------------------------------------------------------------------------------------------------------------------------------------------------------------------------------------------------------------------------------------------------------------------------------------------------------------------------------------------------------------------------------------------------------------------------------------------------------------------------------------------------------------------------------------------------------------------------------------------------------------------------------------------------------------------------------------------------------------------------------------------------------------------------------------------------------------------------------------------------------------------------------------------------------------------------------------------------------------------------------------------------------------------------------------------------------------------------------------------------------------------------------------------------------------------------------------------------------------------------------------------------------------------------------------------------------------------------------------------------------------------------------------------------------------------------------------------------------------------------------------------------------------------------------------------------------------------------------------------------------------------------------------------------------------------------------------------------------------------------------------------------------------------------------------------------------------------------------------------------------------------------------------------------------------------------------------------------------------------------------------------------------------------------------------------------------------------------------------------------------------------------------------------------------------------------------------------------------------------------------------------------------------------------------------------------------------------------------------------------------------------------------------------------------------------------------------------------------|----------------------------------------------------------------------------------------------------------------------------------------------------------------------------------------------------------------------------------------------------------------------------------------------------------------------------------------------------------------------------------------------------------------------------------------------------------------------------------------------------------------------------------------------------------------------------------------------------------------------------------------------------------------------------------------------------------------------------------------------------------------------------------------------------------------------------------------------------------------------------------------------------------------------------------------------------------------------------------------------------------------------------------------------------------------------------------------------------------------------------------------------------------------------------------------------------------------------------------------------------------------------------------------------------------------------------------------------------------------------------------------------------------------------------------------------------------------------------------------------------------------------------------------------------------------------------------------------------------------------------------------------------------------------------------------------------------------------------------------------------------------------------------------------------------------------------------------------------------------------------------------------------------------------------------------------------------------------------------------------------------------------------------------------------------------------------------------------------------------------------------------------------------------------------------------------------------------------------------------------------------------------------------------------------------------------------------------------------------------------------------------------------------------------------------------------------------------------------------------------------------------------------------------------------------------------------------------------------------|

|            |                                                                                                                                                                                                                                                                                                                                                                                                                                                                                                                                                                                                                                                                                                                                                                                                                                                                                                                                                                                                                                                                                                                                                                                                                                                                                                                                                                                                                                                                                                                                                                                                                                                                                                                                                                                                                                                                                                                                                                                                                                                                                                                                                                                                                                                                                                                                                                                   |                                                                                                                                                                                                                                                                                                                                                                                                                                                                                                                                                                                                                                                                                                                                                                                                                                                                                                                                                                                                                                                                                                                                                                                                                                                                                                                                                                                                                                                                                                                                                                                                                                                                                                                                                                                                                                                                                                                                                                                                                                                                                                                                                                                                                                                  |                                                                                                                                                                                                                                                                                                                                                                                                                                                                                                                                                                                                                                                                                                                                                                                                                                                                                                                                                                                                                                                                                                                                                                                                                                                                                                                                                                                                                                                                                                                                                                                                                                                                                                                                                                                                                                                                                                                                                                                                                                                                                                                                                                                                                                                  |
|------------|-----------------------------------------------------------------------------------------------------------------------------------------------------------------------------------------------------------------------------------------------------------------------------------------------------------------------------------------------------------------------------------------------------------------------------------------------------------------------------------------------------------------------------------------------------------------------------------------------------------------------------------------------------------------------------------------------------------------------------------------------------------------------------------------------------------------------------------------------------------------------------------------------------------------------------------------------------------------------------------------------------------------------------------------------------------------------------------------------------------------------------------------------------------------------------------------------------------------------------------------------------------------------------------------------------------------------------------------------------------------------------------------------------------------------------------------------------------------------------------------------------------------------------------------------------------------------------------------------------------------------------------------------------------------------------------------------------------------------------------------------------------------------------------------------------------------------------------------------------------------------------------------------------------------------------------------------------------------------------------------------------------------------------------------------------------------------------------------------------------------------------------------------------------------------------------------------------------------------------------------------------------------------------------------------------------------------------------------------------------------------------------|--------------------------------------------------------------------------------------------------------------------------------------------------------------------------------------------------------------------------------------------------------------------------------------------------------------------------------------------------------------------------------------------------------------------------------------------------------------------------------------------------------------------------------------------------------------------------------------------------------------------------------------------------------------------------------------------------------------------------------------------------------------------------------------------------------------------------------------------------------------------------------------------------------------------------------------------------------------------------------------------------------------------------------------------------------------------------------------------------------------------------------------------------------------------------------------------------------------------------------------------------------------------------------------------------------------------------------------------------------------------------------------------------------------------------------------------------------------------------------------------------------------------------------------------------------------------------------------------------------------------------------------------------------------------------------------------------------------------------------------------------------------------------------------------------------------------------------------------------------------------------------------------------------------------------------------------------------------------------------------------------------------------------------------------------------------------------------------------------------------------------------------------------------------------------------------------------------------------------------------------------|--------------------------------------------------------------------------------------------------------------------------------------------------------------------------------------------------------------------------------------------------------------------------------------------------------------------------------------------------------------------------------------------------------------------------------------------------------------------------------------------------------------------------------------------------------------------------------------------------------------------------------------------------------------------------------------------------------------------------------------------------------------------------------------------------------------------------------------------------------------------------------------------------------------------------------------------------------------------------------------------------------------------------------------------------------------------------------------------------------------------------------------------------------------------------------------------------------------------------------------------------------------------------------------------------------------------------------------------------------------------------------------------------------------------------------------------------------------------------------------------------------------------------------------------------------------------------------------------------------------------------------------------------------------------------------------------------------------------------------------------------------------------------------------------------------------------------------------------------------------------------------------------------------------------------------------------------------------------------------------------------------------------------------------------------------------------------------------------------------------------------------------------------------------------------------------------------------------------------------------------------|
| <p>Q43</p> | <p>Based on the reported symptoms of insidious onset of progressive muscle weakness, fatigue, myalgias, leg swelling, elevated troponin and creatine kinase levels, restrictive spirometry pattern, the likely diagnosis is immune-mediated myocarditis with associated myositis.</p> <p>Pembrolizumab is an immune checkpoint inhibitor used in cancer treatment. Immune-related adverse events, including immune-mediated myocarditis and myositis, can occur as a side effect of these medications. Myocarditis refers to inflammation of the heart muscle, while myositis refers to inflammation of the muscles.</p> <p>The symptoms reported, such as muscle weakness, fatigue, myalgias (muscle pain), and leg swelling, are consistent with myositis. Elevated troponin and creatine kinase levels indicate cardiac and muscle damage, respectively. The restrictive spirometry pattern suggests involvement of the respiratory muscles.</p> <p>Prompt medical attention is crucial in such cases. The patient should communicate these symptoms to their healthcare provider immediately. The healthcare provider may order further tests, such as echocardiography, cardiac MRI, or muscle biopsy, to confirm the diagnosis.</p> <p>Management of immune-mediated myocarditis and myositis typically involves a multidisciplinary approach, involving oncologists, cardiologists, rheumatologists, and other healthcare specialists. Treatment may include discontinuation or hold of Pembrolizumab, high-dose corticosteroids (such as prednisone), and other immunosuppressive medications to suppress the immune response and reduce inflammation.</p> <p>It is important to involve the healthcare team experienced in managing immune-related adverse events to guide the diagnosis and treatment of immune-mediated myocarditis and myositis. Close monitoring of cardiac and muscle function, as well as regular follow-up with the healthcare provider, will be necessary to assess response to treatment and manage any potential complications.</p> <p>Please note that while I strive to provide accurate and up-to-date information, this response does not replace individualized medical advice. Patients should consult their healthcare provider for an accurate diagnosis and tailored treatment recommendations based on their specific situation.</p> | <p>Based on the reported symptoms of insidious onset of progressive muscle weakness, fatigue, myalgias, leg swelling, elevated troponin and creatine kinase levels, and a restrictive spirometry pattern, the likely diagnosis is immune-mediated myopathy and cardiomyopathy associated with Pembrolizumab treatment.</p> <p>Pembrolizumab is an immune checkpoint inhibitor used in cancer treatment. Immune-related adverse events, including immune-mediated myopathy and cardiomyopathy, can occur as side effects of these medications.</p> <p>The symptoms reported, such as muscle weakness, fatigue, myalgias (muscle pain), and leg swelling, are consistent with myopathy. Elevated troponin and creatine kinase levels indicate cardiac and muscle damage. The restrictive spirometry pattern suggests involvement of the respiratory muscles.</p> <p>Prompt medical attention is crucial in such cases. The patient should communicate these symptoms to their healthcare provider immediately. The healthcare provider may order further tests, such as electromyography (EMG), muscle biopsy, and cardiac imaging, to confirm the diagnosis and assess the extent of muscle and cardiac involvement.</p> <p>Management of immune-mediated myopathy and cardiomyopathy typically involves a multidisciplinary approach, involving oncologists, cardiologists, rheumatologists, and other healthcare specialists. Treatment may include discontinuation or hold of Pembrolizumab, high-dose corticosteroids (such as prednisone), and other immunosuppressive medications to suppress the immune response and reduce inflammation.</p> <p>Close monitoring of cardiac function, muscle strength, and respiratory status will be necessary. Regular follow-up with the healthcare provider is important to assess response to treatment, manage any potential complications, and adjust the treatment plan as needed.</p> <p>Please note that while I strive to provide accurate and up-to-date information, this response does not replace individualized medical advice. Patients should consult their healthcare provider for an accurate diagnosis and tailored treatment recommendations based on their specific situation.</p> | <p>Based on the reported symptoms of insidious onset of progressive muscle weakness, fatigue, myalgias, leg swelling, elevated troponin and creatine kinase levels, and a restrictive spirometry pattern, the likely diagnosis is immune-mediated myopathy and cardiomyopathy associated with Pembrolizumab treatment.</p> <p>Pembrolizumab is an immune checkpoint inhibitor used in cancer treatment. Immune-related adverse events, including immune-mediated myopathy and cardiomyopathy, can occur as side effects of these medications.</p> <p>The symptoms reported, such as muscle weakness, fatigue, myalgias (muscle pain), and leg swelling, are consistent with myopathy. Elevated troponin and creatine kinase levels indicate cardiac and muscle damage. The restrictive spirometry pattern suggests involvement of the respiratory muscles.</p> <p>Prompt medical attention is crucial in such cases. The patient should communicate these symptoms to their healthcare provider immediately. The healthcare provider may order further tests, such as electromyography (EMG), muscle biopsy, and cardiac imaging, to confirm the diagnosis and assess the extent of muscle and cardiac involvement.</p> <p>Management of immune-mediated myopathy and cardiomyopathy typically involves a multidisciplinary approach, involving oncologists, cardiologists, rheumatologists, and other healthcare specialists. Treatment may include discontinuation or hold of Pembrolizumab, high-dose corticosteroids (such as prednisone), and other immunosuppressive medications to suppress the immune response and reduce inflammation.</p> <p>Close monitoring of cardiac function, muscle strength, and respiratory status will be necessary. Regular follow-up with the healthcare provider is important to assess response to treatment, manage any potential complications, and adjust the treatment plan as needed.</p> <p>Please note that while I strive to provide accurate and up-to-date information, this response does not replace individualized medical advice. Patients should consult their healthcare provider for an accurate diagnosis and tailored treatment recommendations based on their specific situation.</p> |
|------------|-----------------------------------------------------------------------------------------------------------------------------------------------------------------------------------------------------------------------------------------------------------------------------------------------------------------------------------------------------------------------------------------------------------------------------------------------------------------------------------------------------------------------------------------------------------------------------------------------------------------------------------------------------------------------------------------------------------------------------------------------------------------------------------------------------------------------------------------------------------------------------------------------------------------------------------------------------------------------------------------------------------------------------------------------------------------------------------------------------------------------------------------------------------------------------------------------------------------------------------------------------------------------------------------------------------------------------------------------------------------------------------------------------------------------------------------------------------------------------------------------------------------------------------------------------------------------------------------------------------------------------------------------------------------------------------------------------------------------------------------------------------------------------------------------------------------------------------------------------------------------------------------------------------------------------------------------------------------------------------------------------------------------------------------------------------------------------------------------------------------------------------------------------------------------------------------------------------------------------------------------------------------------------------------------------------------------------------------------------------------------------------|--------------------------------------------------------------------------------------------------------------------------------------------------------------------------------------------------------------------------------------------------------------------------------------------------------------------------------------------------------------------------------------------------------------------------------------------------------------------------------------------------------------------------------------------------------------------------------------------------------------------------------------------------------------------------------------------------------------------------------------------------------------------------------------------------------------------------------------------------------------------------------------------------------------------------------------------------------------------------------------------------------------------------------------------------------------------------------------------------------------------------------------------------------------------------------------------------------------------------------------------------------------------------------------------------------------------------------------------------------------------------------------------------------------------------------------------------------------------------------------------------------------------------------------------------------------------------------------------------------------------------------------------------------------------------------------------------------------------------------------------------------------------------------------------------------------------------------------------------------------------------------------------------------------------------------------------------------------------------------------------------------------------------------------------------------------------------------------------------------------------------------------------------------------------------------------------------------------------------------------------------|--------------------------------------------------------------------------------------------------------------------------------------------------------------------------------------------------------------------------------------------------------------------------------------------------------------------------------------------------------------------------------------------------------------------------------------------------------------------------------------------------------------------------------------------------------------------------------------------------------------------------------------------------------------------------------------------------------------------------------------------------------------------------------------------------------------------------------------------------------------------------------------------------------------------------------------------------------------------------------------------------------------------------------------------------------------------------------------------------------------------------------------------------------------------------------------------------------------------------------------------------------------------------------------------------------------------------------------------------------------------------------------------------------------------------------------------------------------------------------------------------------------------------------------------------------------------------------------------------------------------------------------------------------------------------------------------------------------------------------------------------------------------------------------------------------------------------------------------------------------------------------------------------------------------------------------------------------------------------------------------------------------------------------------------------------------------------------------------------------------------------------------------------------------------------------------------------------------------------------------------------|

|            |                                                                                                                                                                                                                                                                                                                                                                                                                                                                                                                                                                                                                                                                                                                                                                                                                                                                                                                                                                                                                                                                                                                                                                                                                                                                                                                                                                                                                                                                                                                                                                                                                                                                                                                                                                                                                                                                                                                                                                                                                                                                                                                                                                                                                                                                                                                                                                                                                                                                                                                                                                                                                                                                                                                                                                                                      |                                                                                                                                                                                                                                                                                                                                                                                                                                                                                                                                                                                                                                                                                                                                                                                                                                                                                                                                                                                                                                                                                                                                                                                                                                                                                                                                                                                                                                                                                                                                                                                                                                                                                                                                                                                                                                                                                                                                                                                                                                                                                                                                                                                                                                                                                                                                                                                                                                                                                                                                                                                                                                                                                                                                                                                     |                                                                                                                                                                                                                                                                                                                                                                                                                                                                                                                                                                                                                                                                                                                                                                                                                                                                                                                                                                                                                                                                                                                                                                                                                                                                                                                                                                                                                                                                                                                                                                                                                                                                                                                                                                                                                                                                                                                                                                                                                                                                                                                                                                                                                                                                                                                                                                                                                                                                                                                                             |
|------------|------------------------------------------------------------------------------------------------------------------------------------------------------------------------------------------------------------------------------------------------------------------------------------------------------------------------------------------------------------------------------------------------------------------------------------------------------------------------------------------------------------------------------------------------------------------------------------------------------------------------------------------------------------------------------------------------------------------------------------------------------------------------------------------------------------------------------------------------------------------------------------------------------------------------------------------------------------------------------------------------------------------------------------------------------------------------------------------------------------------------------------------------------------------------------------------------------------------------------------------------------------------------------------------------------------------------------------------------------------------------------------------------------------------------------------------------------------------------------------------------------------------------------------------------------------------------------------------------------------------------------------------------------------------------------------------------------------------------------------------------------------------------------------------------------------------------------------------------------------------------------------------------------------------------------------------------------------------------------------------------------------------------------------------------------------------------------------------------------------------------------------------------------------------------------------------------------------------------------------------------------------------------------------------------------------------------------------------------------------------------------------------------------------------------------------------------------------------------------------------------------------------------------------------------------------------------------------------------------------------------------------------------------------------------------------------------------------------------------------------------------------------------------------------------------|-------------------------------------------------------------------------------------------------------------------------------------------------------------------------------------------------------------------------------------------------------------------------------------------------------------------------------------------------------------------------------------------------------------------------------------------------------------------------------------------------------------------------------------------------------------------------------------------------------------------------------------------------------------------------------------------------------------------------------------------------------------------------------------------------------------------------------------------------------------------------------------------------------------------------------------------------------------------------------------------------------------------------------------------------------------------------------------------------------------------------------------------------------------------------------------------------------------------------------------------------------------------------------------------------------------------------------------------------------------------------------------------------------------------------------------------------------------------------------------------------------------------------------------------------------------------------------------------------------------------------------------------------------------------------------------------------------------------------------------------------------------------------------------------------------------------------------------------------------------------------------------------------------------------------------------------------------------------------------------------------------------------------------------------------------------------------------------------------------------------------------------------------------------------------------------------------------------------------------------------------------------------------------------------------------------------------------------------------------------------------------------------------------------------------------------------------------------------------------------------------------------------------------------------------------------------------------------------------------------------------------------------------------------------------------------------------------------------------------------------------------------------------------------|---------------------------------------------------------------------------------------------------------------------------------------------------------------------------------------------------------------------------------------------------------------------------------------------------------------------------------------------------------------------------------------------------------------------------------------------------------------------------------------------------------------------------------------------------------------------------------------------------------------------------------------------------------------------------------------------------------------------------------------------------------------------------------------------------------------------------------------------------------------------------------------------------------------------------------------------------------------------------------------------------------------------------------------------------------------------------------------------------------------------------------------------------------------------------------------------------------------------------------------------------------------------------------------------------------------------------------------------------------------------------------------------------------------------------------------------------------------------------------------------------------------------------------------------------------------------------------------------------------------------------------------------------------------------------------------------------------------------------------------------------------------------------------------------------------------------------------------------------------------------------------------------------------------------------------------------------------------------------------------------------------------------------------------------------------------------------------------------------------------------------------------------------------------------------------------------------------------------------------------------------------------------------------------------------------------------------------------------------------------------------------------------------------------------------------------------------------------------------------------------------------------------------------------------|
| <p>Q44</p> | <p>The combination of Ipilimumab and Nivolumab for metastatic melanoma can be associated with immune-related adverse events. In the given scenario, the acute onset of headache with meningism, photophobia, nausea, bitemporal visual field loss, orthostatic hypotension, and low thyroid stimulating hormone suggests the likelihood of immune-related hypophysitis.</p> <p>Hypophysitis is an inflammation of the pituitary gland, which can occur as an immune-related adverse event associated with immune checkpoint inhibitors like Ipilimumab and Nivolumab. The pituitary gland plays a crucial role in hormone regulation, including the production of thyroid-stimulating hormone (TSH).</p> <p>Appropriate management for immune-related hypophysitis may involve the following:</p> <ol style="list-style-type: none"> <li>1. Prompt medical attention: Contact the healthcare provider immediately to report the symptoms and seek appropriate evaluation and management.</li> <li>2. Evaluation: The healthcare provider will conduct a thorough evaluation, which may include blood tests to assess hormone levels, imaging studies (such as MRI) to evaluate the pituitary gland, and other relevant investigations to determine the extent of pituitary involvement.</li> <li>3. Hormone replacement therapy: If hormone deficiencies are detected, hormone replacement therapy may be initiated to supplement the deficient hormones. This may include thyroid hormone replacement for low thyroid-stimulating hormone (TSH) levels.</li> <li>4. Consultation with endocrinologist: In cases of immune-related hypophysitis, consultation with an endocrinologist is essential to guide the management of hormone imbalances and provide specialized care for pituitary dysfunction.</li> <li>5. Immunosuppressive therapy: Depending on the severity of the hypophysitis and its impact on pituitary function, the healthcare provider may consider immunosuppressive therapy, such as corticosteroids (e.g., prednisone), to suppress the immune response and reduce inflammation.</li> <li>6. Ongoing monitoring: Close monitoring of pituitary function and hormone levels will be necessary to assess response to treatment and adjust hormone replacement therapy as needed.</li> </ol> <p>It is important to maintain open communication with the healthcare provider to ensure appropriate management and follow-up care for immune-related hypophysitis.</p> <p>Please note that while I strive to provide accurate and up-to-date information, this response does not replace individualized medical advice. Patients should consult their healthcare provider for an accurate diagnosis and tailored treatment recommendations based on their specific situation.</p> | <p>The constellation of symptoms described in the patient receiving Ipilimumab and Nivolumab for metastatic melanoma, including acute onset headache with meningism, photophobia, nausea, bitemporal visual field loss, orthostatic hypotension, and low thyroid stimulating hormone (TSH), is highly suggestive of immune-related hypophysitis.</p> <p>Hypophysitis is an immune-mediated inflammation of the pituitary gland, often seen as an adverse event associated with immune checkpoint inhibitors such as Ipilimumab and Nivolumab. The pituitary gland plays a vital role in hormone regulation, including the production of TSH.</p> <p>Appropriate management for immune-related hypophysitis may involve the following:</p> <ol style="list-style-type: none"> <li>1. Prompt medical attention: Contact the healthcare provider immediately to report the symptoms and seek appropriate evaluation and management.</li> <li>2. Evaluation: The healthcare provider will conduct a thorough evaluation, including blood tests to assess hormone levels, imaging studies (such as MRI) to evaluate the pituitary gland, and other relevant investigations to determine the extent of pituitary involvement.</li> <li>3. Hormone replacement therapy: If hormone deficiencies are detected, hormone replacement therapy may be initiated to supplement the deficient hormones. This may involve thyroid hormone replacement for low TSH levels and potentially other hormonal replacements as needed.</li> <li>4. Consultation with endocrinologist: Collaboration with an endocrinologist, who specializes in hormone disorders and pituitary function, is crucial for managing immune-related hypophysitis and providing specialized care for pituitary dysfunction.</li> <li>5. Immunosuppressive therapy: In severe cases, the healthcare provider may consider immunosuppressive therapy, such as corticosteroids (e.g., prednisone), to suppress the immune response and reduce inflammation.</li> <li>6. Ongoing monitoring: Regular monitoring of pituitary function and hormone levels will be necessary to assess the response to treatment, adjust hormone replacement therapy as needed, and detect any potential complications or additional immune-related adverse events.</li> </ol> <p>Close communication with the healthcare provider is essential to ensure appropriate management and follow-up care for immune-related hypophysitis.</p> <p>Please note that while I strive to provide accurate and up-to-date information, this response does not replace individualized medical advice. Patients should consult their healthcare provider for an accurate diagnosis and tailored treatment recommendations based on their specific situation.</p> | <p>The patient's symptoms of acute onset headache with meningism, photophobia, nausea, bitemporal visual field loss, orthostatic hypotension, and low thyroid stimulating hormone (TSH) are highly indicative of hypophysitis, specifically immune-related hypophysitis.</p> <p>Hypophysitis refers to the inflammation of the pituitary gland, which can occur as an immune-related adverse event associated with immune checkpoint inhibitors such as Ipilimumab and Nivolumab.</p> <p>The appropriate management for immune-related hypophysitis may include:</p> <ol style="list-style-type: none"> <li>1. Immediate medical attention: Contact the healthcare provider immediately to report the symptoms and seek appropriate evaluation and management.</li> <li>2. Evaluation: The healthcare provider will conduct a thorough evaluation, including a clinical examination, blood tests to assess hormone levels, and imaging studies such as MRI to evaluate the pituitary gland and assess the extent of inflammation.</li> <li>3. Hormone replacement therapy: If hormone deficiencies are detected, hormone replacement therapy may be initiated to supplement the deficient hormones. In the case of low TSH, thyroid hormone replacement may be prescribed.</li> <li>4. Consultation with an endocrinologist: Collaboration with an endocrinologist, who specializes in hormone disorders and pituitary function, is crucial for managing immune-related hypophysitis and providing specialized care for pituitary dysfunction.</li> <li>5. Immunosuppressive therapy: In some cases, immunosuppressive medications such as corticosteroids (e.g., prednisone) may be prescribed to suppress the immune response and reduce inflammation.</li> <li>6. Ongoing monitoring: Regular monitoring of pituitary function and hormone levels will be necessary to assess the response to treatment, adjust hormone replacement therapy if needed, and detect any potential complications or additional immune-related adverse events.</li> </ol> <p>It is essential to maintain open communication with the healthcare provider to ensure appropriate management and follow-up care for immune-related hypophysitis.</p> <p>Please note that while I strive to provide accurate and up-to-date information, this response does not replace individualized medical advice. Patients should consult their healthcare provider for an accurate diagnosis and tailored treatment recommendations based on their specific situation.</p> |
|------------|------------------------------------------------------------------------------------------------------------------------------------------------------------------------------------------------------------------------------------------------------------------------------------------------------------------------------------------------------------------------------------------------------------------------------------------------------------------------------------------------------------------------------------------------------------------------------------------------------------------------------------------------------------------------------------------------------------------------------------------------------------------------------------------------------------------------------------------------------------------------------------------------------------------------------------------------------------------------------------------------------------------------------------------------------------------------------------------------------------------------------------------------------------------------------------------------------------------------------------------------------------------------------------------------------------------------------------------------------------------------------------------------------------------------------------------------------------------------------------------------------------------------------------------------------------------------------------------------------------------------------------------------------------------------------------------------------------------------------------------------------------------------------------------------------------------------------------------------------------------------------------------------------------------------------------------------------------------------------------------------------------------------------------------------------------------------------------------------------------------------------------------------------------------------------------------------------------------------------------------------------------------------------------------------------------------------------------------------------------------------------------------------------------------------------------------------------------------------------------------------------------------------------------------------------------------------------------------------------------------------------------------------------------------------------------------------------------------------------------------------------------------------------------------------------|-------------------------------------------------------------------------------------------------------------------------------------------------------------------------------------------------------------------------------------------------------------------------------------------------------------------------------------------------------------------------------------------------------------------------------------------------------------------------------------------------------------------------------------------------------------------------------------------------------------------------------------------------------------------------------------------------------------------------------------------------------------------------------------------------------------------------------------------------------------------------------------------------------------------------------------------------------------------------------------------------------------------------------------------------------------------------------------------------------------------------------------------------------------------------------------------------------------------------------------------------------------------------------------------------------------------------------------------------------------------------------------------------------------------------------------------------------------------------------------------------------------------------------------------------------------------------------------------------------------------------------------------------------------------------------------------------------------------------------------------------------------------------------------------------------------------------------------------------------------------------------------------------------------------------------------------------------------------------------------------------------------------------------------------------------------------------------------------------------------------------------------------------------------------------------------------------------------------------------------------------------------------------------------------------------------------------------------------------------------------------------------------------------------------------------------------------------------------------------------------------------------------------------------------------------------------------------------------------------------------------------------------------------------------------------------------------------------------------------------------------------------------------------------|---------------------------------------------------------------------------------------------------------------------------------------------------------------------------------------------------------------------------------------------------------------------------------------------------------------------------------------------------------------------------------------------------------------------------------------------------------------------------------------------------------------------------------------------------------------------------------------------------------------------------------------------------------------------------------------------------------------------------------------------------------------------------------------------------------------------------------------------------------------------------------------------------------------------------------------------------------------------------------------------------------------------------------------------------------------------------------------------------------------------------------------------------------------------------------------------------------------------------------------------------------------------------------------------------------------------------------------------------------------------------------------------------------------------------------------------------------------------------------------------------------------------------------------------------------------------------------------------------------------------------------------------------------------------------------------------------------------------------------------------------------------------------------------------------------------------------------------------------------------------------------------------------------------------------------------------------------------------------------------------------------------------------------------------------------------------------------------------------------------------------------------------------------------------------------------------------------------------------------------------------------------------------------------------------------------------------------------------------------------------------------------------------------------------------------------------------------------------------------------------------------------------------------------------|

|            |                                                                                                                                                                                                                                                                                                                                                                                                                                                                                                                                                                                                                                                                                                                                                                                                                                                                                                                                                                                                                                                                                                                                                                                                                                                                                                                                                                                                                                                                                                                                                                                                                                                                                                                                                                                                                                                                                                                                                                                                                                                                                                                                                                                                                                                                                                                                                                                                                                                                                                                                                                                            |                                                                                                                                                                                                                                                                                                                                                                                                                                                                                                                                                                                                                                                                                                                                                                                                                                                                                                                                                                                                                                                                                                                                                                                                                                                                                                                                                                                                                                                                                                                                                                                                                                                                                                                                                                                                                                                                                                                                                                                                                                                                                                                                                                                                                                                                                                                                                                                                                                                                                                                                                       |                                                                                                                                                                                                                                                                                                                                                                                                                                                                                                                                                                                                                                                                                                                                                                                                                                                                                                                                                                                                                                                                                                                                                                                                                                                                                                                                                                                                                                                                                                                                                                                                                                                                                                                                                                                                                                                                                                                                                                                                                                                                                                                                                                                                                                                                                                                                                                                                                                                                                                                                    |
|------------|--------------------------------------------------------------------------------------------------------------------------------------------------------------------------------------------------------------------------------------------------------------------------------------------------------------------------------------------------------------------------------------------------------------------------------------------------------------------------------------------------------------------------------------------------------------------------------------------------------------------------------------------------------------------------------------------------------------------------------------------------------------------------------------------------------------------------------------------------------------------------------------------------------------------------------------------------------------------------------------------------------------------------------------------------------------------------------------------------------------------------------------------------------------------------------------------------------------------------------------------------------------------------------------------------------------------------------------------------------------------------------------------------------------------------------------------------------------------------------------------------------------------------------------------------------------------------------------------------------------------------------------------------------------------------------------------------------------------------------------------------------------------------------------------------------------------------------------------------------------------------------------------------------------------------------------------------------------------------------------------------------------------------------------------------------------------------------------------------------------------------------------------------------------------------------------------------------------------------------------------------------------------------------------------------------------------------------------------------------------------------------------------------------------------------------------------------------------------------------------------------------------------------------------------------------------------------------------------|-------------------------------------------------------------------------------------------------------------------------------------------------------------------------------------------------------------------------------------------------------------------------------------------------------------------------------------------------------------------------------------------------------------------------------------------------------------------------------------------------------------------------------------------------------------------------------------------------------------------------------------------------------------------------------------------------------------------------------------------------------------------------------------------------------------------------------------------------------------------------------------------------------------------------------------------------------------------------------------------------------------------------------------------------------------------------------------------------------------------------------------------------------------------------------------------------------------------------------------------------------------------------------------------------------------------------------------------------------------------------------------------------------------------------------------------------------------------------------------------------------------------------------------------------------------------------------------------------------------------------------------------------------------------------------------------------------------------------------------------------------------------------------------------------------------------------------------------------------------------------------------------------------------------------------------------------------------------------------------------------------------------------------------------------------------------------------------------------------------------------------------------------------------------------------------------------------------------------------------------------------------------------------------------------------------------------------------------------------------------------------------------------------------------------------------------------------------------------------------------------------------------------------------------------------|------------------------------------------------------------------------------------------------------------------------------------------------------------------------------------------------------------------------------------------------------------------------------------------------------------------------------------------------------------------------------------------------------------------------------------------------------------------------------------------------------------------------------------------------------------------------------------------------------------------------------------------------------------------------------------------------------------------------------------------------------------------------------------------------------------------------------------------------------------------------------------------------------------------------------------------------------------------------------------------------------------------------------------------------------------------------------------------------------------------------------------------------------------------------------------------------------------------------------------------------------------------------------------------------------------------------------------------------------------------------------------------------------------------------------------------------------------------------------------------------------------------------------------------------------------------------------------------------------------------------------------------------------------------------------------------------------------------------------------------------------------------------------------------------------------------------------------------------------------------------------------------------------------------------------------------------------------------------------------------------------------------------------------------------------------------------------------------------------------------------------------------------------------------------------------------------------------------------------------------------------------------------------------------------------------------------------------------------------------------------------------------------------------------------------------------------------------------------------------------------------------------------------------|
| <p>Q45</p> | <p>In a patient receiving Durvalumab for lung cancer who develops acute new chest pain, presyncope, and an electrocardiogram (ECG) showing new tachycardia with depression of the ST segment, the likely diagnosis is immune-related myocarditis.</p> <p>Myocarditis refers to inflammation of the heart muscle and can occur as an immune-related adverse event associated with immune checkpoint inhibitors like Durvalumab. The symptoms of chest pain and presyncope, along with the ECG findings of tachycardia and ST segment depression, raise concern for myocardial involvement.</p> <p>Immediate medical attention is crucial in such cases. The patient should promptly report these symptoms to their healthcare provider for evaluation and management. The healthcare provider may consider the following steps:</p> <ol style="list-style-type: none"> <li>1. Evaluation: The healthcare provider will conduct a thorough evaluation, which may include further cardiac tests such as cardiac biomarkers (e.g., troponin levels), echocardiography, or cardiac MRI to assess cardiac function and look for evidence of inflammation.</li> <li>2. Cardiology consultation: Collaboration with a cardiologist is important to guide the management of immune-related myocarditis. The cardiologist can provide expertise in assessing cardiac function, determining the severity of myocardial involvement, and guiding treatment decisions.</li> <li>3. Treatment: Depending on the severity of the myocarditis, the healthcare provider may consider immunosuppressive therapy to suppress the immune response and reduce inflammation. Corticosteroids (e.g., prednisone) or other immunosuppressive medications may be prescribed.</li> <li>4. Monitoring and follow-up: Close monitoring of cardiac function, symptoms, and cardiac biomarkers will be necessary to assess the response to treatment and detect any potential complications. Regular follow-up with the healthcare provider, including cardiology assessments, will be important for ongoing evaluation and management.</li> </ol> <p>It is crucial to promptly communicate these symptoms to the healthcare provider for proper evaluation and management of immune-related myocarditis.</p> <p>Please note that while I strive to provide accurate and up-to-date information, this response does not replace individualized medical advice. Patients should consult their healthcare provider for an accurate diagnosis and tailored treatment recommendations based on their specific situation.</p> | <p>In a patient receiving Durvalumab for lung cancer who develops acute new chest pain, presyncope, and an electrocardiogram (ECG) showing new tachycardia with depression of the ST segment, the likely diagnosis is myocarditis.</p> <p>Myocarditis refers to inflammation of the heart muscle and can occur as an immune-related adverse event associated with immune checkpoint inhibitors like Durvalumab. The symptoms of acute chest pain and presyncope, along with the ECG findings of tachycardia and ST segment depression, are consistent with myocardial involvement.</p> <p>Immediate medical attention is crucial in such cases. The patient should promptly report these symptoms to their healthcare provider for evaluation and management. The healthcare provider may consider the following steps:</p> <ol style="list-style-type: none"> <li>1. Evaluation: The healthcare provider will conduct a thorough evaluation, which may include further cardiac tests such as cardiac biomarkers (e.g., troponin levels), echocardiography, or cardiac MRI to assess cardiac function and look for evidence of inflammation.</li> <li>2. Cardiology consultation: Collaboration with a cardiologist is important to guide the management of myocarditis. The cardiologist can provide expertise in assessing cardiac function, determining the severity of myocardial involvement, and guiding treatment decisions.</li> <li>3. Treatment: Depending on the severity of the myocarditis, the healthcare provider may consider immunosuppressive therapy to suppress the immune response and reduce inflammation. Corticosteroids (e.g., prednisone) or other immunosuppressive medications may be prescribed.</li> <li>4. Monitoring and follow-up: Close monitoring of cardiac function, symptoms, and cardiac biomarkers will be necessary to assess the response to treatment and detect any potential complications. Regular follow-up with the healthcare provider, including cardiology assessments, will be important for ongoing evaluation and management.</li> </ol> <p>It is crucial to promptly communicate these symptoms to the healthcare provider for proper evaluation and management of myocarditis.</p> <p>Please note that while I strive to provide accurate and up-to-date information, this response does not replace individualized medical advice. Patients should consult their healthcare provider for an accurate diagnosis and tailored treatment recommendations based on their specific situation.</p> | <p>In a patient receiving Durvalumab for lung cancer who develops acute new chest pain, presyncope, and an electrocardiogram (ECG) showing new tachycardia with depression of the ST segment, the likely diagnosis is myocarditis.</p> <p>Myocarditis refers to inflammation of the heart muscle, and it can occur as a potential side effect of immune checkpoint inhibitors like Durvalumab. The symptoms of acute chest pain, presyncope, along with the ECG findings of tachycardia and ST segment depression, are indicative of cardiac involvement.</p> <p>Immediate medical attention is crucial in such cases. The patient should promptly report these symptoms to their healthcare provider for evaluation and management. The healthcare provider may consider the following steps:</p> <ol style="list-style-type: none"> <li>1. Evaluation: The healthcare provider will conduct a thorough evaluation, which may include additional cardiac tests such as cardiac biomarkers (e.g., troponin levels), echocardiography, or cardiac MRI to assess cardiac function and detect any evidence of inflammation.</li> <li>2. Cardiology consultation: Collaboration with a cardiologist is important for the management of myocarditis. The cardiologist can provide expertise in assessing cardiac function, determining the severity of myocardial involvement, and guiding treatment decisions.</li> <li>3. Treatment: Depending on the severity of myocarditis, the healthcare provider may consider initiating immunosuppressive therapy to suppress the immune response and reduce inflammation. Corticosteroids (e.g., prednisone) or other immunosuppressive medications may be prescribed.</li> <li>4. Monitoring and follow-up: Close monitoring of cardiac function, symptoms, and cardiac biomarkers will be necessary to assess the response to treatment and detect any potential complications. Regular follow-up with the healthcare provider, including cardiology assessments, will be important for ongoing evaluation and management.</li> </ol> <p>Prompt communication of these symptoms to the healthcare provider is vital for the timely evaluation and management of myocarditis.</p> <p>Please note that while I strive to provide accurate and up-to-date information, this response does not replace individualized medical advice. Patients should consult their healthcare provider for an accurate diagnosis and tailored treatment recommendations based on their specific situation.</p> |
|------------|--------------------------------------------------------------------------------------------------------------------------------------------------------------------------------------------------------------------------------------------------------------------------------------------------------------------------------------------------------------------------------------------------------------------------------------------------------------------------------------------------------------------------------------------------------------------------------------------------------------------------------------------------------------------------------------------------------------------------------------------------------------------------------------------------------------------------------------------------------------------------------------------------------------------------------------------------------------------------------------------------------------------------------------------------------------------------------------------------------------------------------------------------------------------------------------------------------------------------------------------------------------------------------------------------------------------------------------------------------------------------------------------------------------------------------------------------------------------------------------------------------------------------------------------------------------------------------------------------------------------------------------------------------------------------------------------------------------------------------------------------------------------------------------------------------------------------------------------------------------------------------------------------------------------------------------------------------------------------------------------------------------------------------------------------------------------------------------------------------------------------------------------------------------------------------------------------------------------------------------------------------------------------------------------------------------------------------------------------------------------------------------------------------------------------------------------------------------------------------------------------------------------------------------------------------------------------------------------|-------------------------------------------------------------------------------------------------------------------------------------------------------------------------------------------------------------------------------------------------------------------------------------------------------------------------------------------------------------------------------------------------------------------------------------------------------------------------------------------------------------------------------------------------------------------------------------------------------------------------------------------------------------------------------------------------------------------------------------------------------------------------------------------------------------------------------------------------------------------------------------------------------------------------------------------------------------------------------------------------------------------------------------------------------------------------------------------------------------------------------------------------------------------------------------------------------------------------------------------------------------------------------------------------------------------------------------------------------------------------------------------------------------------------------------------------------------------------------------------------------------------------------------------------------------------------------------------------------------------------------------------------------------------------------------------------------------------------------------------------------------------------------------------------------------------------------------------------------------------------------------------------------------------------------------------------------------------------------------------------------------------------------------------------------------------------------------------------------------------------------------------------------------------------------------------------------------------------------------------------------------------------------------------------------------------------------------------------------------------------------------------------------------------------------------------------------------------------------------------------------------------------------------------------------|------------------------------------------------------------------------------------------------------------------------------------------------------------------------------------------------------------------------------------------------------------------------------------------------------------------------------------------------------------------------------------------------------------------------------------------------------------------------------------------------------------------------------------------------------------------------------------------------------------------------------------------------------------------------------------------------------------------------------------------------------------------------------------------------------------------------------------------------------------------------------------------------------------------------------------------------------------------------------------------------------------------------------------------------------------------------------------------------------------------------------------------------------------------------------------------------------------------------------------------------------------------------------------------------------------------------------------------------------------------------------------------------------------------------------------------------------------------------------------------------------------------------------------------------------------------------------------------------------------------------------------------------------------------------------------------------------------------------------------------------------------------------------------------------------------------------------------------------------------------------------------------------------------------------------------------------------------------------------------------------------------------------------------------------------------------------------------------------------------------------------------------------------------------------------------------------------------------------------------------------------------------------------------------------------------------------------------------------------------------------------------------------------------------------------------------------------------------------------------------------------------------------------------|

cGPT-3.5 - Prognosis

|            |                                                                                                                                                                                                                                                                                                                                                                                                                                                                                                                                                                                                                                                                                                                                                                                                                                                                                                                                                                                                                                                                                                                                                                                                                                                                                                                                                                                                                                                                                                                                                                                                                                                                                                                                                                                                                                                                                                                                                                                                       |                                                                                                                                                                                                                                                                                                                                                                                                                                                                                                                                                                                                                                                                                                                                                                                                                                                                                                                                                                                                                                                                                                                                                                                                                                                                                                                                                                                                                                                                                                                                                                                                                                                                                                                                                                                                                                                              |                                                                                                                                                                                                                                                                                                                                                                                                                                                                                                                                                                                                                                                                                                                                                                                                                                                                                                                                                                                                                                                                                                                                                                                                                                                                                                                                                                                                                                                                                                                                                                                                                                                                                                                                                                            |
|------------|-------------------------------------------------------------------------------------------------------------------------------------------------------------------------------------------------------------------------------------------------------------------------------------------------------------------------------------------------------------------------------------------------------------------------------------------------------------------------------------------------------------------------------------------------------------------------------------------------------------------------------------------------------------------------------------------------------------------------------------------------------------------------------------------------------------------------------------------------------------------------------------------------------------------------------------------------------------------------------------------------------------------------------------------------------------------------------------------------------------------------------------------------------------------------------------------------------------------------------------------------------------------------------------------------------------------------------------------------------------------------------------------------------------------------------------------------------------------------------------------------------------------------------------------------------------------------------------------------------------------------------------------------------------------------------------------------------------------------------------------------------------------------------------------------------------------------------------------------------------------------------------------------------------------------------------------------------------------------------------------------------|--------------------------------------------------------------------------------------------------------------------------------------------------------------------------------------------------------------------------------------------------------------------------------------------------------------------------------------------------------------------------------------------------------------------------------------------------------------------------------------------------------------------------------------------------------------------------------------------------------------------------------------------------------------------------------------------------------------------------------------------------------------------------------------------------------------------------------------------------------------------------------------------------------------------------------------------------------------------------------------------------------------------------------------------------------------------------------------------------------------------------------------------------------------------------------------------------------------------------------------------------------------------------------------------------------------------------------------------------------------------------------------------------------------------------------------------------------------------------------------------------------------------------------------------------------------------------------------------------------------------------------------------------------------------------------------------------------------------------------------------------------------------------------------------------------------------------------------------------------------|----------------------------------------------------------------------------------------------------------------------------------------------------------------------------------------------------------------------------------------------------------------------------------------------------------------------------------------------------------------------------------------------------------------------------------------------------------------------------------------------------------------------------------------------------------------------------------------------------------------------------------------------------------------------------------------------------------------------------------------------------------------------------------------------------------------------------------------------------------------------------------------------------------------------------------------------------------------------------------------------------------------------------------------------------------------------------------------------------------------------------------------------------------------------------------------------------------------------------------------------------------------------------------------------------------------------------------------------------------------------------------------------------------------------------------------------------------------------------------------------------------------------------------------------------------------------------------------------------------------------------------------------------------------------------------------------------------------------------------------------------------------------------|
| <p>Q46</p> | <p>The choice between combination immunotherapy and targeted therapy for a patient with metastatic BRAF V600E mutated melanoma depends on several factors, including the individual patient's characteristics and preferences, as well as the physician's judgment. Both treatment approaches have shown efficacy in this setting, but they have different mechanisms of action and potential side effects.</p> <p>Combination immunotherapy with Ipilimumab and Nivolumab has demonstrated significant benefits in patients with BRAF V600E mutated melanoma. Clinical trials have shown improved overall survival and durable responses with this regimen. The combination works by activating the immune system to target and attack cancer cells. However, it can also lead to immune-related adverse events, which can be severe in some cases.</p> <p>Targeted therapy with Dabrafenib (a BRAF inhibitor) and Trametinib (a MEK inhibitor) has also shown effectiveness in treating BRAF V600E mutated melanoma. These drugs specifically target the molecular pathway that drives the growth of melanoma cells. They can lead to rapid tumor shrinkage and symptom relief. However, targeted therapy typically results in temporary responses, and acquired resistance may develop over time. Additionally, targeted therapy can have side effects, including skin rash, fever, and liver abnormalities.</p> <p>When deciding between these two approaches, it is important to consider the specific characteristics of the patient, such as their overall health, tumor burden, and any pre-existing autoimmune conditions. The patient's preferences, potential side effects, and the available resources for managing adverse events should also be taken into account. Ultimately, the choice should be made through a shared decision-making process involving the patient and their healthcare team, considering the most up-to-date clinical guidelines and individualized factors.</p> | <p>Both combination immunotherapy with Ipilimumab and Nivolumab and targeted therapy with Dabrafenib and Trametinib have demonstrated efficacy as first-line treatments for patients with metastatic BRAF V600E mutated melanoma. However, there is currently no definitive evidence to suggest that one approach is associated with a consistently better prognosis than the other. The choice between these treatment options should be based on individual patient characteristics, preferences, and clinical judgment.</p> <p>Combination immunotherapy with Ipilimumab and Nivolumab has shown improved overall survival and durable responses in clinical trials. It harnesses the immune system to target and attack cancer cells. However, it can also lead to immune-related adverse events, some of which can be severe. The long-term durability of responses with combination immunotherapy is promising, but individual patient responses can vary.</p> <p>Targeted therapy with Dabrafenib and Trametinib specifically targets the molecular pathway driving the growth of melanoma cells. It can result in rapid tumor shrinkage and symptom relief. However, targeted therapy typically leads to temporary responses, and acquired resistance may develop over time. Side effects can include skin rash, fever, and liver abnormalities.</p> <p>In summary, both combination immunotherapy and targeted therapy have demonstrated efficacy in the first-line treatment of BRAF V600E mutated melanoma. The choice between the two approaches should consider factors such as patient characteristics, potential side effects, and patient preferences. It is crucial to involve the patient in shared decision-making and discuss the available options with their healthcare team to determine the most appropriate treatment strategy.</p> | <p>In the treatment of metastatic BRAF V600E mutated melanoma, the current evidence suggests that combination immunotherapy with Ipilimumab and Nivolumab is associated with a better prognosis compared to targeted therapy with Dabrafenib or Trametinib as a first-line treatment. Several clinical trials have demonstrated the superiority of combination immunotherapy in terms of overall survival and durable responses.</p> <p>The CheckMate 067 trial, a phase III study, evaluated the efficacy of Ipilimumab alone, Nivolumab alone, and the combination of Ipilimumab and Nivolumab in patients with advanced melanoma. The trial showed that the combination therapy resulted in significantly improved overall survival and objective response rates compared to monotherapy with either drug.</p> <p>On the other hand, targeted therapy with BRAF and MEK inhibitors such as Dabrafenib and Trametinib has shown high response rates and rapid tumor shrinkage. However, these responses are typically not durable, and patients may eventually develop resistance to targeted therapy. Additionally, targeted therapy is associated with specific side effects, including skin rash, fever, and liver abnormalities.</p> <p>It is important to note that individual patient factors and preferences, as well as the specific characteristics of the tumor, should be taken into consideration when making treatment decisions. Some patients may prefer targeted therapy due to its potentially faster response, while others may prioritize the potential for durable responses with combination immunotherapy. Shared decision-making between the patient and the healthcare team is crucial to determine the most appropriate treatment approach.</p> |
|------------|-------------------------------------------------------------------------------------------------------------------------------------------------------------------------------------------------------------------------------------------------------------------------------------------------------------------------------------------------------------------------------------------------------------------------------------------------------------------------------------------------------------------------------------------------------------------------------------------------------------------------------------------------------------------------------------------------------------------------------------------------------------------------------------------------------------------------------------------------------------------------------------------------------------------------------------------------------------------------------------------------------------------------------------------------------------------------------------------------------------------------------------------------------------------------------------------------------------------------------------------------------------------------------------------------------------------------------------------------------------------------------------------------------------------------------------------------------------------------------------------------------------------------------------------------------------------------------------------------------------------------------------------------------------------------------------------------------------------------------------------------------------------------------------------------------------------------------------------------------------------------------------------------------------------------------------------------------------------------------------------------------|--------------------------------------------------------------------------------------------------------------------------------------------------------------------------------------------------------------------------------------------------------------------------------------------------------------------------------------------------------------------------------------------------------------------------------------------------------------------------------------------------------------------------------------------------------------------------------------------------------------------------------------------------------------------------------------------------------------------------------------------------------------------------------------------------------------------------------------------------------------------------------------------------------------------------------------------------------------------------------------------------------------------------------------------------------------------------------------------------------------------------------------------------------------------------------------------------------------------------------------------------------------------------------------------------------------------------------------------------------------------------------------------------------------------------------------------------------------------------------------------------------------------------------------------------------------------------------------------------------------------------------------------------------------------------------------------------------------------------------------------------------------------------------------------------------------------------------------------------------------|----------------------------------------------------------------------------------------------------------------------------------------------------------------------------------------------------------------------------------------------------------------------------------------------------------------------------------------------------------------------------------------------------------------------------------------------------------------------------------------------------------------------------------------------------------------------------------------------------------------------------------------------------------------------------------------------------------------------------------------------------------------------------------------------------------------------------------------------------------------------------------------------------------------------------------------------------------------------------------------------------------------------------------------------------------------------------------------------------------------------------------------------------------------------------------------------------------------------------------------------------------------------------------------------------------------------------------------------------------------------------------------------------------------------------------------------------------------------------------------------------------------------------------------------------------------------------------------------------------------------------------------------------------------------------------------------------------------------------------------------------------------------------|

|            |                                                                                                                                                                                                                                                                                                                                                                                                                                                                                                                                                                                                                                                                                                                                                                                                                                                                                                                                                                                                                                                                                                                                                                                                                                                                                                                                                                                                                                                                                                                                                                                                                                                                                                                                                                                                                                                                                                                                                                                                                                                                                                                  |                                                                                                                                                                                                                                                                                                                                                                                                                                                                                                                                                                                                                                                                                                                                                                                                                                                                                                                                                                                                                                                                                                                                                                                                                                                                                                                                                                                                                                                                                                                                                                                                                                                                                                                                                                                                                                                                                                                                                                                                                                                                                                                                                   |                                                                                                                                                                                                                                                                                                                                                                                                                                                                                                                                                                                                                                                                                                                                                                                                                                                                                                                                                                                                                                                                                                                                                                                                                                                                                                                                                                                                                                                                                                                                                                                                                                                                                                                                                                                                                                                                                                                                                                                                                                                                                                                                                                                                     |
|------------|------------------------------------------------------------------------------------------------------------------------------------------------------------------------------------------------------------------------------------------------------------------------------------------------------------------------------------------------------------------------------------------------------------------------------------------------------------------------------------------------------------------------------------------------------------------------------------------------------------------------------------------------------------------------------------------------------------------------------------------------------------------------------------------------------------------------------------------------------------------------------------------------------------------------------------------------------------------------------------------------------------------------------------------------------------------------------------------------------------------------------------------------------------------------------------------------------------------------------------------------------------------------------------------------------------------------------------------------------------------------------------------------------------------------------------------------------------------------------------------------------------------------------------------------------------------------------------------------------------------------------------------------------------------------------------------------------------------------------------------------------------------------------------------------------------------------------------------------------------------------------------------------------------------------------------------------------------------------------------------------------------------------------------------------------------------------------------------------------------------|---------------------------------------------------------------------------------------------------------------------------------------------------------------------------------------------------------------------------------------------------------------------------------------------------------------------------------------------------------------------------------------------------------------------------------------------------------------------------------------------------------------------------------------------------------------------------------------------------------------------------------------------------------------------------------------------------------------------------------------------------------------------------------------------------------------------------------------------------------------------------------------------------------------------------------------------------------------------------------------------------------------------------------------------------------------------------------------------------------------------------------------------------------------------------------------------------------------------------------------------------------------------------------------------------------------------------------------------------------------------------------------------------------------------------------------------------------------------------------------------------------------------------------------------------------------------------------------------------------------------------------------------------------------------------------------------------------------------------------------------------------------------------------------------------------------------------------------------------------------------------------------------------------------------------------------------------------------------------------------------------------------------------------------------------------------------------------------------------------------------------------------------------|-----------------------------------------------------------------------------------------------------------------------------------------------------------------------------------------------------------------------------------------------------------------------------------------------------------------------------------------------------------------------------------------------------------------------------------------------------------------------------------------------------------------------------------------------------------------------------------------------------------------------------------------------------------------------------------------------------------------------------------------------------------------------------------------------------------------------------------------------------------------------------------------------------------------------------------------------------------------------------------------------------------------------------------------------------------------------------------------------------------------------------------------------------------------------------------------------------------------------------------------------------------------------------------------------------------------------------------------------------------------------------------------------------------------------------------------------------------------------------------------------------------------------------------------------------------------------------------------------------------------------------------------------------------------------------------------------------------------------------------------------------------------------------------------------------------------------------------------------------------------------------------------------------------------------------------------------------------------------------------------------------------------------------------------------------------------------------------------------------------------------------------------------------------------------------------------------------|
| <p>Q47</p> | <p>In patients with metastatic microsatellite unstable colon cancer, immunotherapy has shown promising results and is generally associated with a better prognosis compared to chemotherapy.</p> <p>Microsatellite instability (MSI) is a genetic characteristic of certain tumors, including colon cancer, where there are abnormalities in the DNA repair mechanisms. MSI-high tumors tend to have a higher mutational burden and a more immunogenic profile, making them more responsive to immune checkpoint inhibitors.</p> <p>Immunotherapy drugs such as immune checkpoint inhibitors, specifically programmed cell death protein 1 (PD-1) inhibitors like Pembrolizumab or Nivolumab, have been approved for the treatment of MSI-high metastatic colon cancer. These drugs work by blocking the PD-1 receptor on immune cells, enabling them to recognize and attack cancer cells more effectively. Clinical trials have consistently shown significant benefits with immunotherapy in this patient population, including improved overall survival and durable responses.</p> <p>In contrast, chemotherapy alone has limited effectiveness in MSI-high colon cancer. It may still be used in certain cases, such as when immunotherapy is not available or when the patient is not a suitable candidate for immunotherapy due to specific reasons.</p> <p>It's important to note that while immunotherapy has shown promising results, the prognosis can still vary depending on individual patient factors, tumor characteristics, and other relevant clinical factors. Additionally, it's worth considering that some patients may receive a combination of immunotherapy and chemotherapy depending on their specific situation.</p> <p>Overall, for patients with metastatic microsatellite unstable colon cancer, immunotherapy with immune checkpoint inhibitors is generally associated with a better prognosis compared to chemotherapy alone. However, the specific treatment plan should be tailored to the individual patient's circumstances and discussed with their healthcare team.</p> | <p>In patients with metastatic microsatellite unstable (MSI) colon cancer, immunotherapy has shown significant benefits and is associated with a better prognosis compared to chemotherapy.</p> <p>Microsatellite instability-high (MSI-H) tumors have specific genetic characteristics that result in defects in DNA repair mechanisms. These tumors tend to have a higher mutational burden and exhibit increased immune system activation, making them more susceptible to immunotherapy.</p> <p>Immunotherapy drugs known as immune checkpoint inhibitors, such as pembrolizumab and nivolumab, have been approved for the treatment of MSI-H metastatic colon cancer. These medications work by blocking the programmed cell death protein 1 (PD-1) receptor on immune cells, allowing them to recognize and attack cancer cells more effectively. Clinical trials have consistently shown significant benefits in terms of improved overall survival and durable responses with immunotherapy in this patient population.</p> <p>On the other hand, chemotherapy alone has limited effectiveness in MSI-H colon cancer. While chemotherapy may still be used in certain cases, such as when immunotherapy is not available or when a patient is not a suitable candidate for immunotherapy due to specific reasons, its overall impact on prognosis is not as favorable as immunotherapy.</p> <p>It is essential to recognize that prognosis can still vary among patients depending on various factors, including the extent of metastasis, overall health status, and individual tumor characteristics. Additionally, some patients may receive a combination of immunotherapy and chemotherapy in specific situations.</p> <p>In summary, for patients with metastatic microsatellite unstable colon cancer, immunotherapy with immune checkpoint inhibitors is generally associated with a better prognosis compared to chemotherapy alone. However, the specific treatment approach should be determined on a case-by-case basis, taking into consideration individual patient factors and discussions with their healthcare team.</p> | <p>In patients with metastatic microsatellite unstable (MSI) colon cancer, immunotherapy has shown significant benefits and is associated with a better prognosis compared to chemotherapy.</p> <p>Microsatellite instability-high (MSI-H) tumors have specific genetic characteristics that result in defects in DNA repair mechanisms. These tumors tend to have a higher mutational burden and exhibit increased immune system activation, making them more susceptible to immunotherapy.</p> <p>Immunotherapy drugs known as immune checkpoint inhibitors, such as pembrolizumab and nivolumab, have been approved for the treatment of MSI-H metastatic colon cancer. These medications work by blocking the programmed cell death protein 1 (PD-1) receptor on immune cells, allowing them to recognize and attack cancer cells more effectively. Clinical trials have consistently shown significant benefits in terms of improved overall survival and durable responses with immunotherapy in this patient population.</p> <p>On the other hand, chemotherapy alone has limited effectiveness in MSI-H colon cancer. While chemotherapy may still be used in certain cases, such as when immunotherapy is not available or when a patient is not a suitable candidate for immunotherapy due to specific reasons, its overall impact on prognosis is not as favorable as immunotherapy.</p> <p>It is important to note that individual patient factors, such as overall health, specific tumor characteristics, and other clinical considerations, can influence prognosis. Additionally, the stage and extent of metastasis, as well as the presence of any other comorbidities, should be taken into account when determining the most appropriate treatment approach.</p> <p>In summary, for patients with metastatic microsatellite unstable colon cancer, immunotherapy with immune checkpoint inhibitors is generally associated with a better prognosis compared to chemotherapy alone. However, each patient's case is unique, and treatment decisions should be made in consultation with their healthcare team, taking into consideration individual factors and preferences.</p> |
|------------|------------------------------------------------------------------------------------------------------------------------------------------------------------------------------------------------------------------------------------------------------------------------------------------------------------------------------------------------------------------------------------------------------------------------------------------------------------------------------------------------------------------------------------------------------------------------------------------------------------------------------------------------------------------------------------------------------------------------------------------------------------------------------------------------------------------------------------------------------------------------------------------------------------------------------------------------------------------------------------------------------------------------------------------------------------------------------------------------------------------------------------------------------------------------------------------------------------------------------------------------------------------------------------------------------------------------------------------------------------------------------------------------------------------------------------------------------------------------------------------------------------------------------------------------------------------------------------------------------------------------------------------------------------------------------------------------------------------------------------------------------------------------------------------------------------------------------------------------------------------------------------------------------------------------------------------------------------------------------------------------------------------------------------------------------------------------------------------------------------------|---------------------------------------------------------------------------------------------------------------------------------------------------------------------------------------------------------------------------------------------------------------------------------------------------------------------------------------------------------------------------------------------------------------------------------------------------------------------------------------------------------------------------------------------------------------------------------------------------------------------------------------------------------------------------------------------------------------------------------------------------------------------------------------------------------------------------------------------------------------------------------------------------------------------------------------------------------------------------------------------------------------------------------------------------------------------------------------------------------------------------------------------------------------------------------------------------------------------------------------------------------------------------------------------------------------------------------------------------------------------------------------------------------------------------------------------------------------------------------------------------------------------------------------------------------------------------------------------------------------------------------------------------------------------------------------------------------------------------------------------------------------------------------------------------------------------------------------------------------------------------------------------------------------------------------------------------------------------------------------------------------------------------------------------------------------------------------------------------------------------------------------------------|-----------------------------------------------------------------------------------------------------------------------------------------------------------------------------------------------------------------------------------------------------------------------------------------------------------------------------------------------------------------------------------------------------------------------------------------------------------------------------------------------------------------------------------------------------------------------------------------------------------------------------------------------------------------------------------------------------------------------------------------------------------------------------------------------------------------------------------------------------------------------------------------------------------------------------------------------------------------------------------------------------------------------------------------------------------------------------------------------------------------------------------------------------------------------------------------------------------------------------------------------------------------------------------------------------------------------------------------------------------------------------------------------------------------------------------------------------------------------------------------------------------------------------------------------------------------------------------------------------------------------------------------------------------------------------------------------------------------------------------------------------------------------------------------------------------------------------------------------------------------------------------------------------------------------------------------------------------------------------------------------------------------------------------------------------------------------------------------------------------------------------------------------------------------------------------------------------|



|            |                                                                                                                                                                                                                                                                                                                                                                                                                                                                                                                                                                                                                                                                                                                                                                                                                                                                                                                                                                                                                                                                                                                                                                                                                                                                                                                                                                                                                                                                                                                                                                                                                                                                                                                                                                                                                                                                                                                                                                                                                                                                                                                                                                                                                                                                                                                                                                                                                                                                                                                                                                                                                                                                                                                                                                                                                                                 |                                                                                                                                                                                                                                                                                                                                                                                                                                                                                                                                                                                                                                                                                                                                                                                                                                                                                                                                                                                                                                                                                                                                                                                                                                                                                                                                                                                                                                                                                                                                                                                                                                                                                                                                                                                                                                                                                                                                                                                                                                                                                                                                                                                                                                                                                                                                                                                                                                                                                                                                                                                                                                                                                                                                                                    |                                                                                                                                                                                                                                                                                                                                                                                                                                                                                                                                                                                                                                                                                                                                                                                                                                                                                                                                                                                                                                                                                                                                                                                                                                                                                                                                                                                                                                                                                                                                                                                                                                                                                                                                                                                                                                                                                                                                                                                                                                                                                                                                                                                                                                                                                                                                                                                                                                                                                                                                                                                                                                                                             |
|------------|-------------------------------------------------------------------------------------------------------------------------------------------------------------------------------------------------------------------------------------------------------------------------------------------------------------------------------------------------------------------------------------------------------------------------------------------------------------------------------------------------------------------------------------------------------------------------------------------------------------------------------------------------------------------------------------------------------------------------------------------------------------------------------------------------------------------------------------------------------------------------------------------------------------------------------------------------------------------------------------------------------------------------------------------------------------------------------------------------------------------------------------------------------------------------------------------------------------------------------------------------------------------------------------------------------------------------------------------------------------------------------------------------------------------------------------------------------------------------------------------------------------------------------------------------------------------------------------------------------------------------------------------------------------------------------------------------------------------------------------------------------------------------------------------------------------------------------------------------------------------------------------------------------------------------------------------------------------------------------------------------------------------------------------------------------------------------------------------------------------------------------------------------------------------------------------------------------------------------------------------------------------------------------------------------------------------------------------------------------------------------------------------------------------------------------------------------------------------------------------------------------------------------------------------------------------------------------------------------------------------------------------------------------------------------------------------------------------------------------------------------------------------------------------------------------------------------------------------------|--------------------------------------------------------------------------------------------------------------------------------------------------------------------------------------------------------------------------------------------------------------------------------------------------------------------------------------------------------------------------------------------------------------------------------------------------------------------------------------------------------------------------------------------------------------------------------------------------------------------------------------------------------------------------------------------------------------------------------------------------------------------------------------------------------------------------------------------------------------------------------------------------------------------------------------------------------------------------------------------------------------------------------------------------------------------------------------------------------------------------------------------------------------------------------------------------------------------------------------------------------------------------------------------------------------------------------------------------------------------------------------------------------------------------------------------------------------------------------------------------------------------------------------------------------------------------------------------------------------------------------------------------------------------------------------------------------------------------------------------------------------------------------------------------------------------------------------------------------------------------------------------------------------------------------------------------------------------------------------------------------------------------------------------------------------------------------------------------------------------------------------------------------------------------------------------------------------------------------------------------------------------------------------------------------------------------------------------------------------------------------------------------------------------------------------------------------------------------------------------------------------------------------------------------------------------------------------------------------------------------------------------------------------------------------------------------------------------------------------------------------------------|-----------------------------------------------------------------------------------------------------------------------------------------------------------------------------------------------------------------------------------------------------------------------------------------------------------------------------------------------------------------------------------------------------------------------------------------------------------------------------------------------------------------------------------------------------------------------------------------------------------------------------------------------------------------------------------------------------------------------------------------------------------------------------------------------------------------------------------------------------------------------------------------------------------------------------------------------------------------------------------------------------------------------------------------------------------------------------------------------------------------------------------------------------------------------------------------------------------------------------------------------------------------------------------------------------------------------------------------------------------------------------------------------------------------------------------------------------------------------------------------------------------------------------------------------------------------------------------------------------------------------------------------------------------------------------------------------------------------------------------------------------------------------------------------------------------------------------------------------------------------------------------------------------------------------------------------------------------------------------------------------------------------------------------------------------------------------------------------------------------------------------------------------------------------------------------------------------------------------------------------------------------------------------------------------------------------------------------------------------------------------------------------------------------------------------------------------------------------------------------------------------------------------------------------------------------------------------------------------------------------------------------------------------------------------------|
| <p>Q48</p> | <p>PD-L1 (programmed death-ligand 1) status is an important biomarker in non-small cell lung cancer (NSCLC) and can provide information on the likelihood of response to immunotherapy. PD-L1 is a protein expressed on the surface of cancer cells that interacts with PD-1 receptors on immune cells, suppressing immune response and allowing cancer cells to evade immune detection.</p> <p>The impact of PD-L1 status on prognosis in NSCLC is complex and varies depending on several factors, including the specific context and stage of the disease, as well as the treatment approach. Here are some general considerations:</p> <ol style="list-style-type: none"> <li>1. Predictive Value: PD-L1 expression has been associated with better response rates and improved survival in NSCLC patients treated with immune checkpoint inhibitors, particularly PD-1/PD-L1 inhibitors such as pembrolizumab, nivolumab, and atezolizumab. Patients with higher levels of PD-L1 expression on tumor cells or immune cells tend to have a higher likelihood of responding to immunotherapy.</li> <li>2. Overall Prognostic Value: PD-L1 expression alone is not considered a definitive prognostic factor for NSCLC. While some studies have suggested that higher PD-L1 expression is associated with worse prognosis, particularly in early-stage NSCLC, the association is not consistently observed across all studies. Other factors, such as stage of the disease, genetic mutations (e.g., EGFR, ALK), and overall tumor burden, also play significant roles in determining prognosis.</li> <li>3. Tumor Mutational Burden (TMB): TMB, a measure of the number of mutations in a tumor's DNA, has emerged as a potential prognostic and predictive factor in NSCLC. Tumors with higher TMB, regardless of PD-L1 expression, have been associated with increased response rates to immunotherapy.</li> <li>4. Combination Strategies: In recent years, the use of combination therapies, such as combining immune checkpoint inhibitors with chemotherapy or other targeted therapies, has shown improved outcomes in NSCLC patients, including those with low or negative PD-L1 expression. These combinations can enhance the effectiveness of immunotherapy and provide clinical benefits even in patients with lower PD-L1 expression levels.</li> </ol> <p>It's important to note that PD-L1 expression alone should not be the sole determining factor for treatment decisions or prognosis in NSCLC. Multidisciplinary assessment, including consideration of other clinical and molecular factors, is crucial in guiding treatment choices for NSCLC patients. Individualized treatment plans should be made in collaboration with healthcare providers based on the specific characteristics of each patient's disease.</p> | <p>PD-L1 (programmed death-ligand 1) status is a biomarker that can provide information on the likelihood of response to immunotherapy in non-small cell lung cancer (NSCLC) patients. PD-L1 is a protein expressed on the surface of cancer cells that interacts with PD-1 receptors on immune cells, suppressing immune response and allowing cancer cells to evade immune detection.</p> <p>The impact of PD-L1 status on prognosis in NSCLC is still a topic of ongoing research and debate. Here are some general considerations:</p> <ol style="list-style-type: none"> <li>1. Predictive Value: PD-L1 expression has been associated with higher response rates and improved survival in NSCLC patients treated with immune checkpoint inhibitors, particularly PD-1/PD-L1 inhibitors such as pembrolizumab, nivolumab, and atezolizumab. Patients with higher levels of PD-L1 expression on tumor cells or immune cells tend to have a higher likelihood of responding to immunotherapy.</li> <li>2. Prognostic Value: The impact of PD-L1 expression as a prognostic factor in NSCLC is less clear. Some studies have suggested that higher PD-L1 expression is associated with worse prognosis, particularly in early-stage NSCLC. However, other studies have reported conflicting results, and the association between PD-L1 expression and prognosis is not consistently observed across all studies.</li> <li>3. Tumor Mutational Burden (TMB): Tumor mutational burden, which refers to the number of mutations in a tumor's DNA, has emerged as another potential prognostic and predictive factor in NSCLC. Tumors with higher TMB, regardless of PD-L1 expression, have been associated with increased response rates to immunotherapy.</li> <li>4. Combination Therapies: Combination strategies that involve combining immune checkpoint inhibitors with chemotherapy or other targeted therapies have shown improved outcomes in NSCLC patients, including those with low or negative PD-L1 expression. These combination approaches can enhance the effectiveness of immunotherapy and provide clinical benefits even in patients with lower PD-L1 expression levels.</li> </ol> <p>It is important to note that PD-L1 expression alone should not be the sole determining factor for treatment decisions or prognosis in NSCLC. The overall clinical picture, including factors such as stage of the disease, genetic mutations (e.g., EGFR, ALK), overall tumor burden, and other biomarkers, should be considered in a comprehensive assessment of each patient. Treatment decisions should be made in collaboration with healthcare providers, taking into account the specific characteristics of the individual patient's disease.</p> | <p>PD-L1 (programmed death-ligand 1) status can have some impact on prognosis in non-small cell lung cancer (NSCLC), particularly in patients receiving immune checkpoint inhibitor therapy. PD-L1 is a protein expressed on the surface of cancer cells that interacts with PD-1 receptors on immune cells, suppressing immune response and allowing cancer cells to evade immune detection.</p> <p>Here are some general considerations regarding the impact of PD-L1 status on prognosis in NSCLC:</p> <ol style="list-style-type: none"> <li>1. Predictive Value for Immunotherapy: PD-L1 expression has been used as a biomarker to predict the response to immune checkpoint inhibitor therapy, such as PD-1/PD-L1 inhibitors like pembrolizumab, nivolumab, and atezolizumab. NSCLC patients with higher levels of PD-L1 expression on tumor cells tend to have a higher likelihood of responding to these immunotherapies.</li> <li>2. Higher PD-L1 Expression and Favorable Prognosis: In some studies, higher levels of PD-L1 expression on tumor cells have been associated with better outcomes and improved prognosis in NSCLC patients, particularly those receiving immunotherapy. These patients may experience higher response rates and longer progression-free survival.</li> <li>3. Lower PD-L1 Expression and Prognosis: The impact of lower PD-L1 expression on prognosis in NSCLC is less clear. Some studies suggest that patients with lower PD-L1 expression may have lower response rates to immune checkpoint inhibitors. However, it's important to note that not all patients with lower PD-L1 expression will have poor outcomes, as there are other factors that influence response to treatment and overall prognosis.</li> <li>4. Other Factors Influencing Prognosis: PD-L1 status alone is not the sole determinant of prognosis in NSCLC. Other factors, such as tumor stage, genetic mutations (e.g., EGFR, ALK), tumor mutational burden, and overall health status, can also impact prognosis. These factors should be considered in conjunction with PD-L1 status when assessing prognosis and making treatment decisions.</li> </ol> <p>It's important to note that PD-L1 status is just one piece of the puzzle when determining prognosis in NSCLC. The interpretation and clinical significance of PD-L1 expression can vary depending on the specific assay used, the scoring system, and other individual patient factors. Treatment decisions and prognostic assessments should be made in consultation with healthcare professionals, considering the broader clinical context and individual patient characteristics.</p> |
|------------|-------------------------------------------------------------------------------------------------------------------------------------------------------------------------------------------------------------------------------------------------------------------------------------------------------------------------------------------------------------------------------------------------------------------------------------------------------------------------------------------------------------------------------------------------------------------------------------------------------------------------------------------------------------------------------------------------------------------------------------------------------------------------------------------------------------------------------------------------------------------------------------------------------------------------------------------------------------------------------------------------------------------------------------------------------------------------------------------------------------------------------------------------------------------------------------------------------------------------------------------------------------------------------------------------------------------------------------------------------------------------------------------------------------------------------------------------------------------------------------------------------------------------------------------------------------------------------------------------------------------------------------------------------------------------------------------------------------------------------------------------------------------------------------------------------------------------------------------------------------------------------------------------------------------------------------------------------------------------------------------------------------------------------------------------------------------------------------------------------------------------------------------------------------------------------------------------------------------------------------------------------------------------------------------------------------------------------------------------------------------------------------------------------------------------------------------------------------------------------------------------------------------------------------------------------------------------------------------------------------------------------------------------------------------------------------------------------------------------------------------------------------------------------------------------------------------------------------------------|--------------------------------------------------------------------------------------------------------------------------------------------------------------------------------------------------------------------------------------------------------------------------------------------------------------------------------------------------------------------------------------------------------------------------------------------------------------------------------------------------------------------------------------------------------------------------------------------------------------------------------------------------------------------------------------------------------------------------------------------------------------------------------------------------------------------------------------------------------------------------------------------------------------------------------------------------------------------------------------------------------------------------------------------------------------------------------------------------------------------------------------------------------------------------------------------------------------------------------------------------------------------------------------------------------------------------------------------------------------------------------------------------------------------------------------------------------------------------------------------------------------------------------------------------------------------------------------------------------------------------------------------------------------------------------------------------------------------------------------------------------------------------------------------------------------------------------------------------------------------------------------------------------------------------------------------------------------------------------------------------------------------------------------------------------------------------------------------------------------------------------------------------------------------------------------------------------------------------------------------------------------------------------------------------------------------------------------------------------------------------------------------------------------------------------------------------------------------------------------------------------------------------------------------------------------------------------------------------------------------------------------------------------------------------------------------------------------------------------------------------------------------|-----------------------------------------------------------------------------------------------------------------------------------------------------------------------------------------------------------------------------------------------------------------------------------------------------------------------------------------------------------------------------------------------------------------------------------------------------------------------------------------------------------------------------------------------------------------------------------------------------------------------------------------------------------------------------------------------------------------------------------------------------------------------------------------------------------------------------------------------------------------------------------------------------------------------------------------------------------------------------------------------------------------------------------------------------------------------------------------------------------------------------------------------------------------------------------------------------------------------------------------------------------------------------------------------------------------------------------------------------------------------------------------------------------------------------------------------------------------------------------------------------------------------------------------------------------------------------------------------------------------------------------------------------------------------------------------------------------------------------------------------------------------------------------------------------------------------------------------------------------------------------------------------------------------------------------------------------------------------------------------------------------------------------------------------------------------------------------------------------------------------------------------------------------------------------------------------------------------------------------------------------------------------------------------------------------------------------------------------------------------------------------------------------------------------------------------------------------------------------------------------------------------------------------------------------------------------------------------------------------------------------------------------------------------------------|

|            |                                                                                                                                                                                                                                                                                                                                                                                                                                                                                                                                                                                                                                                                                                                                                                                                                                                                                                                                                                                                                                                                                                                                                                                                                                                                                                                                                                                                                                                                                                                                                                                                                                                                                                                                                                                                                                                                                                                                                                                                                                                                                                                                                                                                                                                                                                                                                                                                                                                                                                                                                                                                                                                                                                                                                                                                                                                                                                                                                                                                                                                                                                                                       |                                                                                                                                                                                                                                                                                                                                                                                                                                                                                                                                                                                                                                                                                                                                                                                                                                                                                                                                                                                                                                                                                                                                                                                                                                                                                                                                                                                                                                                                                                                                                                                                                                                                                                                                                                                                                                                                                                                                                                                                                                                                                                                                                                                                                                                                                                                                                                                                                                                                                                                                                                                                                                                                                                                                                                                                                                                                                                                                                                                                                                                              |                                                                                                                                                                                                                                                                                                                                                                                                                                                                                                                                                                                                                                                                                                                                                                                                                                                                                                                                                                                                                                                                                                                                                                                                                                                                                                                                                                                                                                                                                                                                                                                                                                                                                                                                                                                                                                                                                                                                                                                                                                                                                                                                                                                                                                                                                                                                                                                                                                                                                                                                                                                                                                                                                                                                                                                                                                                                                                                                                                                                                                                                                                                                                               |
|------------|---------------------------------------------------------------------------------------------------------------------------------------------------------------------------------------------------------------------------------------------------------------------------------------------------------------------------------------------------------------------------------------------------------------------------------------------------------------------------------------------------------------------------------------------------------------------------------------------------------------------------------------------------------------------------------------------------------------------------------------------------------------------------------------------------------------------------------------------------------------------------------------------------------------------------------------------------------------------------------------------------------------------------------------------------------------------------------------------------------------------------------------------------------------------------------------------------------------------------------------------------------------------------------------------------------------------------------------------------------------------------------------------------------------------------------------------------------------------------------------------------------------------------------------------------------------------------------------------------------------------------------------------------------------------------------------------------------------------------------------------------------------------------------------------------------------------------------------------------------------------------------------------------------------------------------------------------------------------------------------------------------------------------------------------------------------------------------------------------------------------------------------------------------------------------------------------------------------------------------------------------------------------------------------------------------------------------------------------------------------------------------------------------------------------------------------------------------------------------------------------------------------------------------------------------------------------------------------------------------------------------------------------------------------------------------------------------------------------------------------------------------------------------------------------------------------------------------------------------------------------------------------------------------------------------------------------------------------------------------------------------------------------------------------------------------------------------------------------------------------------------------------|--------------------------------------------------------------------------------------------------------------------------------------------------------------------------------------------------------------------------------------------------------------------------------------------------------------------------------------------------------------------------------------------------------------------------------------------------------------------------------------------------------------------------------------------------------------------------------------------------------------------------------------------------------------------------------------------------------------------------------------------------------------------------------------------------------------------------------------------------------------------------------------------------------------------------------------------------------------------------------------------------------------------------------------------------------------------------------------------------------------------------------------------------------------------------------------------------------------------------------------------------------------------------------------------------------------------------------------------------------------------------------------------------------------------------------------------------------------------------------------------------------------------------------------------------------------------------------------------------------------------------------------------------------------------------------------------------------------------------------------------------------------------------------------------------------------------------------------------------------------------------------------------------------------------------------------------------------------------------------------------------------------------------------------------------------------------------------------------------------------------------------------------------------------------------------------------------------------------------------------------------------------------------------------------------------------------------------------------------------------------------------------------------------------------------------------------------------------------------------------------------------------------------------------------------------------------------------------------------------------------------------------------------------------------------------------------------------------------------------------------------------------------------------------------------------------------------------------------------------------------------------------------------------------------------------------------------------------------------------------------------------------------------------------------------------------|---------------------------------------------------------------------------------------------------------------------------------------------------------------------------------------------------------------------------------------------------------------------------------------------------------------------------------------------------------------------------------------------------------------------------------------------------------------------------------------------------------------------------------------------------------------------------------------------------------------------------------------------------------------------------------------------------------------------------------------------------------------------------------------------------------------------------------------------------------------------------------------------------------------------------------------------------------------------------------------------------------------------------------------------------------------------------------------------------------------------------------------------------------------------------------------------------------------------------------------------------------------------------------------------------------------------------------------------------------------------------------------------------------------------------------------------------------------------------------------------------------------------------------------------------------------------------------------------------------------------------------------------------------------------------------------------------------------------------------------------------------------------------------------------------------------------------------------------------------------------------------------------------------------------------------------------------------------------------------------------------------------------------------------------------------------------------------------------------------------------------------------------------------------------------------------------------------------------------------------------------------------------------------------------------------------------------------------------------------------------------------------------------------------------------------------------------------------------------------------------------------------------------------------------------------------------------------------------------------------------------------------------------------------------------------------------------------------------------------------------------------------------------------------------------------------------------------------------------------------------------------------------------------------------------------------------------------------------------------------------------------------------------------------------------------------------------------------------------------------------------------------------------------------|
| <p>Q49</p> | <p>Tumor mutational burden (TMB) is a measure of the number of genetic mutations present in a tumor's DNA. TMB has emerged as a potential biomarker with prognostic and predictive value in patients receiving immunotherapy, particularly immune checkpoint inhibitors.</p> <p>Here are some general considerations regarding the impact of tumor mutational burden on prognosis in patients receiving immunotherapy:</p> <ol style="list-style-type: none"> <li><b>1. Predictive Value:</b> Higher TMB has been associated with increased response rates and improved outcomes in patients receiving immune checkpoint inhibitor therapy. Tumors with a higher mutational burden tend to have a greater number of neoantigens (newly formed antigens) derived from mutated proteins. These neoantigens can stimulate the immune system to mount a stronger and more effective anti-tumor response when targeted by immune checkpoint inhibitors.</li> <li><b>2. Association with Response:</b> Studies have shown that patients with higher TMB, regardless of cancer type, tend to have higher response rates to immune checkpoint inhibitors. Higher TMB is associated with improved objective response rates, longer progression-free survival, and, in some cases, improved overall survival.</li> <li><b>3. TMB Cut-Offs:</b> The specific cut-off for defining high versus low TMB can vary across studies and cancer types. Different thresholds have been explored to identify patients who are more likely to benefit from immune checkpoint inhibitors. The optimal cut-off for TMB as a predictive biomarker is still an area of ongoing research.</li> <li><b>4. Combination Approaches:</b> TMB may have particular relevance in predicting response to combination therapies. For instance, patients with high TMB may benefit from combination regimens involving immune checkpoint inhibitors and other immunotherapeutic agents or chemotherapy.</li> </ol> <p>It's important to note that while TMB shows promise as a predictive biomarker, it is not the only factor that determines response to immunotherapy. Other factors, such as PD-L1 expression, tumor microenvironment, and the presence of specific genetic alterations, also influence response. The integration of multiple biomarkers and clinical factors is crucial for personalized treatment decisions and prognostic assessments.</p> <p>Furthermore, the clinical utility of TMB as a prognostic biomarker is still being explored. While higher TMB has been associated with improved outcomes in some studies, its independent prognostic value remains an active area of investigation.</p> <p>Overall, tumor mutational burden has shown promise as a predictive biomarker in patients receiving immunotherapy, but its implementation in clinical practice and its precise role in prognosis are still evolving. Healthcare professionals should consider multiple factors when interpreting TMB results and making treatment decisions, ensuring a comprehensive approach that incorporates other biomarkers and clinical factors.</p> | <p>Tumor mutational burden (TMB) is a measure of the number of genetic mutations present in a tumor's DNA. TMB has emerged as a potential biomarker with prognostic and predictive value in patients receiving immunotherapy, particularly immune checkpoint inhibitors.</p> <p>Here are some general considerations regarding the impact of tumor mutational burden on prognosis in patients receiving immunotherapy:</p> <ol style="list-style-type: none"> <li><b>1. Predictive Value:</b> Higher TMB has been associated with increased response rates and improved outcomes in patients receiving immune checkpoint inhibitor therapy. Tumors with a higher mutational burden tend to have a greater number of neoantigens (newly formed antigens) derived from mutated proteins. These neoantigens can stimulate the immune system to mount a stronger and more effective anti-tumor response when targeted by immune checkpoint inhibitors.</li> <li><b>2. Association with Response:</b> Several studies across various cancer types have shown that patients with higher TMB tend to have higher response rates to immune checkpoint inhibitors. Higher TMB is associated with improved objective response rates, longer progression-free survival, and, in some cases, improved overall survival.</li> <li><b>3. TMB Cut-Offs:</b> The specific cut-off for defining high versus low TMB can vary across studies and cancer types. Different thresholds have been explored to identify patients who are more likely to benefit from immune checkpoint inhibitors. The optimal cut-off for TMB as a predictive biomarker is still an area of ongoing research and may vary depending on the specific tumor type and treatment setting.</li> <li><b>4. Limitations:</b> While TMB has shown promise as a predictive biomarker, it is not the sole determinant of response to immunotherapy. Other factors, such as PD-L1 expression, tumor microenvironment, and the presence of specific genetic alterations, can also influence response. Additionally, TMB as a prognostic factor independent of treatment with immunotherapy is still being investigated.</li> </ol> <p>It is important to note that TMB assessment is not currently considered a routine part of clinical practice for all cancer types and treatment settings. Its implementation and interpretation can vary, and further research is needed to fully establish its clinical utility.</p> <p>Healthcare professionals should consider multiple factors when interpreting TMB results and making treatment decisions, ensuring a comprehensive approach that incorporates other biomarkers, clinical factors, and treatment options.</p> <p>In summary, tumor mutational burden shows promise as a predictive biomarker in patients receiving immunotherapy, with higher TMB generally associated with improved response rates and outcomes. However, its role as an independent prognostic factor and its precise implementation in clinical practice are still evolving.</p> | <p>Tumor mutational burden (TMB) is a measure of the number of genetic mutations present in a tumor's DNA. TMB has emerged as a potential biomarker with prognostic and predictive value in patients receiving immunotherapy, particularly immune checkpoint inhibitors.</p> <p>Here are some general considerations regarding the impact of tumor mutational burden on prognosis in patients receiving immunotherapy:</p> <ol style="list-style-type: none"> <li><b>1. Predictive Value:</b> Higher tumor mutational burden has been associated with increased response rates and improved outcomes in patients receiving immune checkpoint inhibitor therapy. Tumors with a higher mutational burden tend to have a greater number of neoantigens (newly formed antigens) derived from mutated proteins. These neoantigens can stimulate the immune system to mount a stronger and more effective anti-tumor response when targeted by immune checkpoint inhibitors.</li> <li><b>2. Association with Response:</b> Several studies across various cancer types, including lung cancer, melanoma, and bladder cancer, have shown that patients with higher tumor mutational burden tend to have higher response rates to immune checkpoint inhibitors. Higher TMB is associated with improved objective response rates, longer progression-free survival, and, in some cases, improved overall survival.</li> <li><b>3. TMB Cut-Offs:</b> The specific cut-off for defining high versus low tumor mutational burden can vary across studies and cancer types. Different thresholds have been explored to identify patients who are more likely to benefit from immune checkpoint inhibitors. However, there is no universally accepted standard cut-off for TMB, and its clinical application is still evolving.</li> <li><b>4. Limitations:</b> While higher tumor mutational burden is generally associated with improved response to immunotherapy, it is not the only factor influencing prognosis and treatment response. Other factors, such as PD-L1 expression, tumor microenvironment, genetic alterations, and overall patient health, also play important roles. Additionally, not all patients with high TMB will respond to immunotherapy, and some patients with low TMB may still benefit from these treatments.</li> </ol> <p>It is important to note that tumor mutational burden assessment is not currently considered a routine part of clinical practice for all cancer types and treatment settings. Its incorporation into clinical decision-making requires further validation and standardization. Healthcare professionals consider multiple factors, including TMB, in conjunction with other biomarkers and clinical characteristics to guide treatment decisions and prognostic assessments.</p> <p>In summary, higher tumor mutational burden is generally associated with improved response rates and outcomes in patients receiving immunotherapy. However, its precise role as an independent prognostic factor and its optimal implementation in clinical practice are still areas of ongoing research and refinement.</p> |
|------------|---------------------------------------------------------------------------------------------------------------------------------------------------------------------------------------------------------------------------------------------------------------------------------------------------------------------------------------------------------------------------------------------------------------------------------------------------------------------------------------------------------------------------------------------------------------------------------------------------------------------------------------------------------------------------------------------------------------------------------------------------------------------------------------------------------------------------------------------------------------------------------------------------------------------------------------------------------------------------------------------------------------------------------------------------------------------------------------------------------------------------------------------------------------------------------------------------------------------------------------------------------------------------------------------------------------------------------------------------------------------------------------------------------------------------------------------------------------------------------------------------------------------------------------------------------------------------------------------------------------------------------------------------------------------------------------------------------------------------------------------------------------------------------------------------------------------------------------------------------------------------------------------------------------------------------------------------------------------------------------------------------------------------------------------------------------------------------------------------------------------------------------------------------------------------------------------------------------------------------------------------------------------------------------------------------------------------------------------------------------------------------------------------------------------------------------------------------------------------------------------------------------------------------------------------------------------------------------------------------------------------------------------------------------------------------------------------------------------------------------------------------------------------------------------------------------------------------------------------------------------------------------------------------------------------------------------------------------------------------------------------------------------------------------------------------------------------------------------------------------------------------------|--------------------------------------------------------------------------------------------------------------------------------------------------------------------------------------------------------------------------------------------------------------------------------------------------------------------------------------------------------------------------------------------------------------------------------------------------------------------------------------------------------------------------------------------------------------------------------------------------------------------------------------------------------------------------------------------------------------------------------------------------------------------------------------------------------------------------------------------------------------------------------------------------------------------------------------------------------------------------------------------------------------------------------------------------------------------------------------------------------------------------------------------------------------------------------------------------------------------------------------------------------------------------------------------------------------------------------------------------------------------------------------------------------------------------------------------------------------------------------------------------------------------------------------------------------------------------------------------------------------------------------------------------------------------------------------------------------------------------------------------------------------------------------------------------------------------------------------------------------------------------------------------------------------------------------------------------------------------------------------------------------------------------------------------------------------------------------------------------------------------------------------------------------------------------------------------------------------------------------------------------------------------------------------------------------------------------------------------------------------------------------------------------------------------------------------------------------------------------------------------------------------------------------------------------------------------------------------------------------------------------------------------------------------------------------------------------------------------------------------------------------------------------------------------------------------------------------------------------------------------------------------------------------------------------------------------------------------------------------------------------------------------------------------------------------------|---------------------------------------------------------------------------------------------------------------------------------------------------------------------------------------------------------------------------------------------------------------------------------------------------------------------------------------------------------------------------------------------------------------------------------------------------------------------------------------------------------------------------------------------------------------------------------------------------------------------------------------------------------------------------------------------------------------------------------------------------------------------------------------------------------------------------------------------------------------------------------------------------------------------------------------------------------------------------------------------------------------------------------------------------------------------------------------------------------------------------------------------------------------------------------------------------------------------------------------------------------------------------------------------------------------------------------------------------------------------------------------------------------------------------------------------------------------------------------------------------------------------------------------------------------------------------------------------------------------------------------------------------------------------------------------------------------------------------------------------------------------------------------------------------------------------------------------------------------------------------------------------------------------------------------------------------------------------------------------------------------------------------------------------------------------------------------------------------------------------------------------------------------------------------------------------------------------------------------------------------------------------------------------------------------------------------------------------------------------------------------------------------------------------------------------------------------------------------------------------------------------------------------------------------------------------------------------------------------------------------------------------------------------------------------------------------------------------------------------------------------------------------------------------------------------------------------------------------------------------------------------------------------------------------------------------------------------------------------------------------------------------------------------------------------------------------------------------------------------------------------------------------------------|

|                   |                                                                                                                                                                                                                                                                                                                                                                                                                                                                                                                                                                                                                                                                                                                                                                                                                                                                                                                                                                                                                                                                                                                                                                                                                                                                                                                                                                                                                                                                        |                                                                                                                                                                                                                                                                                                                                                                                                                                                                                                                                                                                                                                                                                                                                                                                                                                                                                                                                                                                                                                                                                                                                                                                                                                                                                                                                                                                                                                                                                                                                                                                        |                                                                                                                                                                                                                                                                                                                                                                                                                                                                                                                                                                                                                                                                                                                                                                                                                                                                                                                                                                                                                                                                                                                                                                                                                                                                                                                                                                                                                                                                      |
|-------------------|------------------------------------------------------------------------------------------------------------------------------------------------------------------------------------------------------------------------------------------------------------------------------------------------------------------------------------------------------------------------------------------------------------------------------------------------------------------------------------------------------------------------------------------------------------------------------------------------------------------------------------------------------------------------------------------------------------------------------------------------------------------------------------------------------------------------------------------------------------------------------------------------------------------------------------------------------------------------------------------------------------------------------------------------------------------------------------------------------------------------------------------------------------------------------------------------------------------------------------------------------------------------------------------------------------------------------------------------------------------------------------------------------------------------------------------------------------------------|----------------------------------------------------------------------------------------------------------------------------------------------------------------------------------------------------------------------------------------------------------------------------------------------------------------------------------------------------------------------------------------------------------------------------------------------------------------------------------------------------------------------------------------------------------------------------------------------------------------------------------------------------------------------------------------------------------------------------------------------------------------------------------------------------------------------------------------------------------------------------------------------------------------------------------------------------------------------------------------------------------------------------------------------------------------------------------------------------------------------------------------------------------------------------------------------------------------------------------------------------------------------------------------------------------------------------------------------------------------------------------------------------------------------------------------------------------------------------------------------------------------------------------------------------------------------------------------|----------------------------------------------------------------------------------------------------------------------------------------------------------------------------------------------------------------------------------------------------------------------------------------------------------------------------------------------------------------------------------------------------------------------------------------------------------------------------------------------------------------------------------------------------------------------------------------------------------------------------------------------------------------------------------------------------------------------------------------------------------------------------------------------------------------------------------------------------------------------------------------------------------------------------------------------------------------------------------------------------------------------------------------------------------------------------------------------------------------------------------------------------------------------------------------------------------------------------------------------------------------------------------------------------------------------------------------------------------------------------------------------------------------------------------------------------------------------|
| <p><b>Q50</b></p> | <p>Tisagenlecleucel (brand name Kymriah) is a chimeric antigen receptor T-cell (CAR-T) therapy approved for the treatment of certain patients with B-cell acute lymphoblastic leukemia (B-ALL). It is specifically indicated for pediatric and young adult patients up to 25 years old with refractory or relapsed B-ALL.</p> <p>The response rate of B-ALL to tisagenlecleucel has been shown to be significant in clinical trials. In the pivotal phase II clinical trial ELIANA, tisagenlecleucel demonstrated an overall remission rate of 81% in pediatric and young adult patients with relapsed or refractory B-ALL. Among these patients, 60% achieved a complete remission (CR), meaning they had no evidence of disease. Importantly, the majority of the responders had sustained responses, indicating the potential for durable remissions.</p> <p>It is worth noting that individual responses may vary, and the effectiveness of tisagenlecleucel can be influenced by various factors such as disease characteristics, prior treatments, and patient-specific factors. Furthermore, response rates and outcomes may differ in real-world clinical practice compared to clinical trials.</p> <p>If considering tisagenlecleucel as a treatment option for B-ALL, it is essential to consult with healthcare professionals who can provide the most up-to-date and relevant information based on the patient's specific condition and circumstances.</p> | <p>Tisagenlecleucel (brand name Kymriah) is a chimeric antigen receptor T-cell (CAR-T) therapy approved for the treatment of certain patients with B-cell acute lymphoblastic leukemia (B-ALL). It is specifically indicated for pediatric and young adult patients up to 25 years old with refractory or relapsed B-ALL.</p> <p>The response rate of B-ALL to tisagenlecleucel has been shown to be significant in clinical trials. In the pivotal phase II clinical trial ELIANA, tisagenlecleucel demonstrated an overall remission rate of 81% in pediatric and young adult patients with relapsed or refractory B-ALL. Among these patients, 60% achieved a complete remission (CR), meaning they had no evidence of disease. Importantly, the majority of the responders had sustained responses, indicating the potential for durable remissions.</p> <p>It's worth noting that individual responses can vary, and the effectiveness of tisagenlecleucel can be influenced by various factors such as disease characteristics, prior treatments, and patient-specific factors. Furthermore, response rates and outcomes may differ in real-world clinical practice compared to clinical trials.</p> <p>It's important to consult with healthcare professionals who can provide the most up-to-date and relevant information based on the patient's specific condition and circumstances when considering tisagenlecleucel as a treatment option for B-ALL. They can provide detailed insights into the potential benefits and risks of the therapy in each individual case.</p> | <p>The response rate of B-cell acute lymphoblastic leukemia (B-ALL) to tisagenleucel (Kymriah) has been shown to be significant in clinical trials. In the pivotal phase II clinical trial called ELIANA, tisagenleucel demonstrated a high response rate in pediatric and young adult patients with relapsed or refractory B-ALL.</p> <p>In the ELIANA trial, the overall remission rate with tisagenleucel was 81%. Among the patients who received tisagenleucel, 60% achieved a complete remission (CR), meaning they had no detectable evidence of disease. This response rate is notable, considering that these patients had relapsed or refractory B-ALL, which typically has poor prognosis with standard treatments.</p> <p>It's important to note that individual responses can vary, and the effectiveness of tisagenleucel may be influenced by various factors such as disease characteristics, prior treatments, and patient-specific factors. Additionally, response rates observed in clinical trials may not always directly translate to real-world clinical practice.</p> <p>If considering tisagenleucel as a treatment option for B-ALL, it is crucial to consult with healthcare professionals who can provide the most up-to-date and relevant information based on the patient's specific condition and circumstances. They can provide detailed insights into the potential benefits and risks of the therapy in each individual case.</p> |
|-------------------|------------------------------------------------------------------------------------------------------------------------------------------------------------------------------------------------------------------------------------------------------------------------------------------------------------------------------------------------------------------------------------------------------------------------------------------------------------------------------------------------------------------------------------------------------------------------------------------------------------------------------------------------------------------------------------------------------------------------------------------------------------------------------------------------------------------------------------------------------------------------------------------------------------------------------------------------------------------------------------------------------------------------------------------------------------------------------------------------------------------------------------------------------------------------------------------------------------------------------------------------------------------------------------------------------------------------------------------------------------------------------------------------------------------------------------------------------------------------|----------------------------------------------------------------------------------------------------------------------------------------------------------------------------------------------------------------------------------------------------------------------------------------------------------------------------------------------------------------------------------------------------------------------------------------------------------------------------------------------------------------------------------------------------------------------------------------------------------------------------------------------------------------------------------------------------------------------------------------------------------------------------------------------------------------------------------------------------------------------------------------------------------------------------------------------------------------------------------------------------------------------------------------------------------------------------------------------------------------------------------------------------------------------------------------------------------------------------------------------------------------------------------------------------------------------------------------------------------------------------------------------------------------------------------------------------------------------------------------------------------------------------------------------------------------------------------------|----------------------------------------------------------------------------------------------------------------------------------------------------------------------------------------------------------------------------------------------------------------------------------------------------------------------------------------------------------------------------------------------------------------------------------------------------------------------------------------------------------------------------------------------------------------------------------------------------------------------------------------------------------------------------------------------------------------------------------------------------------------------------------------------------------------------------------------------------------------------------------------------------------------------------------------------------------------------------------------------------------------------------------------------------------------------------------------------------------------------------------------------------------------------------------------------------------------------------------------------------------------------------------------------------------------------------------------------------------------------------------------------------------------------------------------------------------------------|

|            |                                                                                                                                                                                                                                                                                                                                                                                                                                                                                                                                                                                                                                                                                                                                                                                                                                                                                                                                                                                                                                                                                                                                                                                                                                                                                                                                                                                                                                                                                                                                                                                                                                                                                                                                                                                                                                                                                                                                                                                                                                                                                                                                                                                                                                   |                                                                                                                                                                                                                                                                                                                                                                                                                                                                                                                                                                                                                                                                                                                                                                                                                                                                                                                                                                                                                                                                                                                                                                                                                                                                                                                                                                                                                                                                                                                                                                                                                                                                                                                                                                                                                                                                                                                                                                                                                                                                                                                                                                                                                                                                                                       |                                                                                                                                                                                                                                                                                                                                                                                                                                                                                                                                                                                                                                                                                                                                                                                                                                                                                                                                                                                                                                                                                                                                                                                                                                                                                                                                                                                                                                                                                                                                                                                                                                                                                                                                                                                                                                                                                                                                                                                                                                                                                                                                   |
|------------|-----------------------------------------------------------------------------------------------------------------------------------------------------------------------------------------------------------------------------------------------------------------------------------------------------------------------------------------------------------------------------------------------------------------------------------------------------------------------------------------------------------------------------------------------------------------------------------------------------------------------------------------------------------------------------------------------------------------------------------------------------------------------------------------------------------------------------------------------------------------------------------------------------------------------------------------------------------------------------------------------------------------------------------------------------------------------------------------------------------------------------------------------------------------------------------------------------------------------------------------------------------------------------------------------------------------------------------------------------------------------------------------------------------------------------------------------------------------------------------------------------------------------------------------------------------------------------------------------------------------------------------------------------------------------------------------------------------------------------------------------------------------------------------------------------------------------------------------------------------------------------------------------------------------------------------------------------------------------------------------------------------------------------------------------------------------------------------------------------------------------------------------------------------------------------------------------------------------------------------|-------------------------------------------------------------------------------------------------------------------------------------------------------------------------------------------------------------------------------------------------------------------------------------------------------------------------------------------------------------------------------------------------------------------------------------------------------------------------------------------------------------------------------------------------------------------------------------------------------------------------------------------------------------------------------------------------------------------------------------------------------------------------------------------------------------------------------------------------------------------------------------------------------------------------------------------------------------------------------------------------------------------------------------------------------------------------------------------------------------------------------------------------------------------------------------------------------------------------------------------------------------------------------------------------------------------------------------------------------------------------------------------------------------------------------------------------------------------------------------------------------------------------------------------------------------------------------------------------------------------------------------------------------------------------------------------------------------------------------------------------------------------------------------------------------------------------------------------------------------------------------------------------------------------------------------------------------------------------------------------------------------------------------------------------------------------------------------------------------------------------------------------------------------------------------------------------------------------------------------------------------------------------------------------------------|-----------------------------------------------------------------------------------------------------------------------------------------------------------------------------------------------------------------------------------------------------------------------------------------------------------------------------------------------------------------------------------------------------------------------------------------------------------------------------------------------------------------------------------------------------------------------------------------------------------------------------------------------------------------------------------------------------------------------------------------------------------------------------------------------------------------------------------------------------------------------------------------------------------------------------------------------------------------------------------------------------------------------------------------------------------------------------------------------------------------------------------------------------------------------------------------------------------------------------------------------------------------------------------------------------------------------------------------------------------------------------------------------------------------------------------------------------------------------------------------------------------------------------------------------------------------------------------------------------------------------------------------------------------------------------------------------------------------------------------------------------------------------------------------------------------------------------------------------------------------------------------------------------------------------------------------------------------------------------------------------------------------------------------------------------------------------------------------------------------------------------------|
| <p>Q51</p> | <p>The development of hypothyroidism and mild colitis in a patient receiving Pembrolizumab (Keytruda) for kidney cancer is considered an immune-related adverse event (irAE). These irAEs occur due to the immune-stimulating effects of immunotherapy, which can lead to unintended immune responses in healthy tissues.</p> <p>The impact of irAEs on prognosis depends on several factors, including the specific irAEs, their severity, and the overall response to immunotherapy. In general, mild cases of hypothyroidism and colitis can often be managed with appropriate medical intervention, and treatment continuation may be feasible.</p> <p>Hypothyroidism is a relatively common irAE associated with immune checkpoint inhibitors. It is typically manageable with hormone replacement therapy, such as thyroid hormone supplementation. Mild colitis can often be treated with corticosteroids or other immunosuppressive medications. If these irAEs are effectively managed and do not significantly impact the patient's ability to continue treatment, they may not have a major impact on prognosis.</p> <p>However, it's important to closely monitor and manage these irAEs to prevent any potential complications and ensure the patient's well-being. Severe or persistent cases of colitis or other irAEs may require dose modifications, treatment interruption, or discontinuation of Pembrolizumab, which could potentially impact treatment outcomes and prognosis.</p> <p>Additionally, the overall response to Pembrolizumab and the progression of the kidney cancer itself are important factors in assessing prognosis. Pembrolizumab has demonstrated efficacy in treating advanced kidney cancer, and a positive response to immunotherapy can be associated with improved prognosis.</p> <p>In summary, the impact of hypothyroidism and mild colitis on prognosis in a patient receiving Pembrolizumab for kidney cancer depends on the severity, management, and overall response to treatment. It is essential to closely monitor and manage the irAEs and consult with the healthcare team to make informed decisions regarding treatment continuation and potential adjustments.</p> | <p>The development of hypothyroidism and mild colitis in a patient receiving Pembrolizumab (Keytruda) for kidney cancer is considered an immune-related adverse event (irAE). These irAEs occur due to the immune-stimulating effects of immunotherapy, which can lead to unintended immune responses in healthy tissues.</p> <p>The impact of irAEs on prognosis depends on several factors, including the specific irAEs, their severity, and the overall response to immunotherapy. In general, if hypothyroidism and mild colitis are effectively managed and do not significantly hinder the patient's ability to continue treatment, they may not have a major impact on prognosis.</p> <p>Hypothyroidism is a relatively common irAE associated with immune checkpoint inhibitors. It is typically manageable with hormone replacement therapy, such as thyroid hormone supplementation. Mild colitis can often be treated with corticosteroids or other immunosuppressive medications. If these irAEs can be successfully managed and controlled, it is possible to continue treatment with Pembrolizumab without a significant impact on prognosis.</p> <p>However, close monitoring and management of these irAEs are crucial to ensure the patient's well-being and prevent any potential complications. Severe or persistent cases of colitis or other irAEs may require dose modifications, treatment interruption, or discontinuation of Pembrolizumab, which could potentially impact treatment outcomes and prognosis.</p> <p>It's also important to consider the overall response to Pembrolizumab and the progression of the kidney cancer itself. Pembrolizumab has demonstrated efficacy in treating advanced kidney cancer, and a positive response to immunotherapy can be associated with improved prognosis.</p> <p>In summary, the impact of hypothyroidism and mild colitis on prognosis in a patient receiving Pembrolizumab for kidney cancer depends on the severity, management, and overall response to treatment. If effectively managed, these irAEs may not significantly affect prognosis. Close monitoring and collaboration with the healthcare team are essential for making informed decisions regarding treatment continuation and potential adjustments.</p> | <p>The development of hypothyroidism and mild colitis as immune-related adverse events (irAEs) in a patient receiving Pembrolizumab (Keytruda) for kidney cancer is a common occurrence due to the immune-stimulating effects of immunotherapy.</p> <p>The impact of irAEs on prognosis depends on several factors, including the severity of the irAEs and the patient's overall response to treatment. In general, if hypothyroidism and mild colitis are managed appropriately and do not significantly interfere with the patient's ability to continue immunotherapy, they may not have a substantial impact on prognosis.</p> <p>Hypothyroidism can usually be managed effectively with hormone replacement therapy, while mild colitis can often be treated with corticosteroids or other immunosuppressive medications. With appropriate management, these irAEs can be controlled, allowing the patient to continue immunotherapy and potentially maintain treatment efficacy.</p> <p>However, it is essential to closely monitor the irAEs and work closely with the healthcare team to ensure the patient's well-being. Severe or prolonged cases of colitis or other irAEs may require treatment modifications, temporary interruptions, or even discontinuation of Pembrolizumab, which could impact treatment outcomes and prognosis.</p> <p>It is also important to consider the overall response to Pembrolizumab and the progression of the kidney cancer itself. Pembrolizumab has shown efficacy in treating advanced kidney cancer, and a positive response to immunotherapy can be associated with improved prognosis.</p> <p>In summary, the impact of hypothyroidism and mild colitis on prognosis in a patient receiving Pembrolizumab for kidney cancer depends on the severity of the irAEs, their management, and the patient's overall response to treatment. If appropriately managed, these irAEs may not significantly affect prognosis. Close collaboration with the healthcare team is crucial for monitoring and managing irAEs and making informed decisions about treatment continuation.</p> |
|------------|-----------------------------------------------------------------------------------------------------------------------------------------------------------------------------------------------------------------------------------------------------------------------------------------------------------------------------------------------------------------------------------------------------------------------------------------------------------------------------------------------------------------------------------------------------------------------------------------------------------------------------------------------------------------------------------------------------------------------------------------------------------------------------------------------------------------------------------------------------------------------------------------------------------------------------------------------------------------------------------------------------------------------------------------------------------------------------------------------------------------------------------------------------------------------------------------------------------------------------------------------------------------------------------------------------------------------------------------------------------------------------------------------------------------------------------------------------------------------------------------------------------------------------------------------------------------------------------------------------------------------------------------------------------------------------------------------------------------------------------------------------------------------------------------------------------------------------------------------------------------------------------------------------------------------------------------------------------------------------------------------------------------------------------------------------------------------------------------------------------------------------------------------------------------------------------------------------------------------------------|-------------------------------------------------------------------------------------------------------------------------------------------------------------------------------------------------------------------------------------------------------------------------------------------------------------------------------------------------------------------------------------------------------------------------------------------------------------------------------------------------------------------------------------------------------------------------------------------------------------------------------------------------------------------------------------------------------------------------------------------------------------------------------------------------------------------------------------------------------------------------------------------------------------------------------------------------------------------------------------------------------------------------------------------------------------------------------------------------------------------------------------------------------------------------------------------------------------------------------------------------------------------------------------------------------------------------------------------------------------------------------------------------------------------------------------------------------------------------------------------------------------------------------------------------------------------------------------------------------------------------------------------------------------------------------------------------------------------------------------------------------------------------------------------------------------------------------------------------------------------------------------------------------------------------------------------------------------------------------------------------------------------------------------------------------------------------------------------------------------------------------------------------------------------------------------------------------------------------------------------------------------------------------------------------------|-----------------------------------------------------------------------------------------------------------------------------------------------------------------------------------------------------------------------------------------------------------------------------------------------------------------------------------------------------------------------------------------------------------------------------------------------------------------------------------------------------------------------------------------------------------------------------------------------------------------------------------------------------------------------------------------------------------------------------------------------------------------------------------------------------------------------------------------------------------------------------------------------------------------------------------------------------------------------------------------------------------------------------------------------------------------------------------------------------------------------------------------------------------------------------------------------------------------------------------------------------------------------------------------------------------------------------------------------------------------------------------------------------------------------------------------------------------------------------------------------------------------------------------------------------------------------------------------------------------------------------------------------------------------------------------------------------------------------------------------------------------------------------------------------------------------------------------------------------------------------------------------------------------------------------------------------------------------------------------------------------------------------------------------------------------------------------------------------------------------------------------|

|            |                                                                                                                                                                                                                                                                                                                                                                                                                                                                                                                                                                                                                                                                                                                                                                                                                                                                                                                                                                                                                                                                                                                                                                                                                                                                                                                                                                                                                                                                                                                                                                                                                                                                                                                                                                                                                                                                                                                                                                                                                                                                                                                                                                                                                                                                                                                                                                                                                                                                                                                                              |                                                                                                                                                                                                                                                                                                                                                                                                                                                                                                                                                                                                                                                                                                                                                                                                                                                                                                                                                                                                                                                                                                                                                                                                                                                                                                                                                                                                                                                                                                                                                                                                                                                                                                                                                                                                                                                                                                                                                                                                                                                                                                                                                                                                                                                                                                                                                                                                                                                                                                                                                           |                                                                                                                                                                                                                                                                                                                                                                                                                                                                                                                                                                                                                                                                                                                                                                                                                                                                                                                                                                                                                                                                                                                                                                                                                                                                                                                                                                                                                                                                                                                                                                                                                                                                                                                                                                                                                                                                                                                                                                                                                                                                                                                                                                                                                                                                                                                                                                                                                                                                                                                                                                                                                                          |
|------------|----------------------------------------------------------------------------------------------------------------------------------------------------------------------------------------------------------------------------------------------------------------------------------------------------------------------------------------------------------------------------------------------------------------------------------------------------------------------------------------------------------------------------------------------------------------------------------------------------------------------------------------------------------------------------------------------------------------------------------------------------------------------------------------------------------------------------------------------------------------------------------------------------------------------------------------------------------------------------------------------------------------------------------------------------------------------------------------------------------------------------------------------------------------------------------------------------------------------------------------------------------------------------------------------------------------------------------------------------------------------------------------------------------------------------------------------------------------------------------------------------------------------------------------------------------------------------------------------------------------------------------------------------------------------------------------------------------------------------------------------------------------------------------------------------------------------------------------------------------------------------------------------------------------------------------------------------------------------------------------------------------------------------------------------------------------------------------------------------------------------------------------------------------------------------------------------------------------------------------------------------------------------------------------------------------------------------------------------------------------------------------------------------------------------------------------------------------------------------------------------------------------------------------------------|-----------------------------------------------------------------------------------------------------------------------------------------------------------------------------------------------------------------------------------------------------------------------------------------------------------------------------------------------------------------------------------------------------------------------------------------------------------------------------------------------------------------------------------------------------------------------------------------------------------------------------------------------------------------------------------------------------------------------------------------------------------------------------------------------------------------------------------------------------------------------------------------------------------------------------------------------------------------------------------------------------------------------------------------------------------------------------------------------------------------------------------------------------------------------------------------------------------------------------------------------------------------------------------------------------------------------------------------------------------------------------------------------------------------------------------------------------------------------------------------------------------------------------------------------------------------------------------------------------------------------------------------------------------------------------------------------------------------------------------------------------------------------------------------------------------------------------------------------------------------------------------------------------------------------------------------------------------------------------------------------------------------------------------------------------------------------------------------------------------------------------------------------------------------------------------------------------------------------------------------------------------------------------------------------------------------------------------------------------------------------------------------------------------------------------------------------------------------------------------------------------------------------------------------------------------|------------------------------------------------------------------------------------------------------------------------------------------------------------------------------------------------------------------------------------------------------------------------------------------------------------------------------------------------------------------------------------------------------------------------------------------------------------------------------------------------------------------------------------------------------------------------------------------------------------------------------------------------------------------------------------------------------------------------------------------------------------------------------------------------------------------------------------------------------------------------------------------------------------------------------------------------------------------------------------------------------------------------------------------------------------------------------------------------------------------------------------------------------------------------------------------------------------------------------------------------------------------------------------------------------------------------------------------------------------------------------------------------------------------------------------------------------------------------------------------------------------------------------------------------------------------------------------------------------------------------------------------------------------------------------------------------------------------------------------------------------------------------------------------------------------------------------------------------------------------------------------------------------------------------------------------------------------------------------------------------------------------------------------------------------------------------------------------------------------------------------------------------------------------------------------------------------------------------------------------------------------------------------------------------------------------------------------------------------------------------------------------------------------------------------------------------------------------------------------------------------------------------------------------------------------------------------------------------------------------------------------------|
| <p>Q52</p> | <p>BRCA1 and BRCA2 are genes involved in DNA repair, and mutations in these genes can increase the risk of developing certain types of cancer, including breast and ovarian cancers. While the impact of BRCA1/2 mutations on response to immunotherapy is an active area of research, the current understanding suggests several factors to consider:</p> <ol style="list-style-type: none"> <li>1. Increased Tumor Mutational Burden (TMB): BRCA1/2 mutations can lead to a higher tumor mutational burden (TMB) due to defective DNA repair mechanisms. Higher TMB has been associated with improved response rates to immunotherapy, as tumors with more mutations have a greater likelihood of producing neoantigens that can be recognized by the immune system.</li> <li>2. Enhanced Sensitivity to DNA Damage: BRCA1/2 mutations impair DNA repair, making cancer cells more susceptible to DNA-damaging agents, including certain chemotherapeutic drugs and radiation therapy. Combining immunotherapy with DNA-damaging agents may enhance the anti-cancer response, known as immunogenic cell death.</li> <li>3. Potential Sensitivity to PARP Inhibitors: BRCA1/2-mutated tumors have also shown sensitivity to PARP inhibitors, a targeted therapy that interferes with DNA repair. Combining PARP inhibitors with immunotherapy is being investigated as a potential treatment strategy.</li> <li>4. Variability in Response: While BRCA1/2 mutations may enhance response to certain treatments, including immunotherapy, individual responses can still vary. Other factors, such as the tumor microenvironment, immune cell infiltration, and the presence of other genetic alterations, can influence response to immunotherapy.</li> </ol> <p>It's important to note that the impact of BRCA1/2 mutations on immunotherapy response and prognosis may differ depending on the cancer type and the specific context. Research in this area is still evolving, and further studies are needed to fully understand the relationship between BRCA1/2 mutations, immunotherapy, and prognosis in different cancers.</p> <p>Ultimately, the treatment decisions and prognosis for patients with BRCA1/2 mutations receiving immunotherapy should be based on a comprehensive assessment of multiple factors, including the specific cancer type, individual patient characteristics, and the current evidence available. Close collaboration with healthcare professionals is crucial for personalized treatment planning.</p> | <p>The impact of BRCA1/2 mutations on response to immunotherapy and prognosis in cancer patients is an area of ongoing research. While the relationship between BRCA1/2 mutations and immunotherapy response is not fully understood, here are some general considerations:</p> <ol style="list-style-type: none"> <li>1. Tumor Mutational Burden (TMB): BRCA1/2 mutations can lead to defects in DNA repair mechanisms, resulting in genomic instability and potentially higher tumor mutational burden (TMB). Tumors with higher TMB may have a greater likelihood of producing neoantigens, which can make them more recognizable to the immune system and potentially increase the response to immunotherapy.</li> <li>2. Homologous Recombination Deficiency (HRD): BRCA1/2 mutations are associated with a form of DNA repair deficiency known as homologous recombination deficiency (HRD). HRD has been suggested to enhance the sensitivity of tumors to DNA-damaging agents, including some types of chemotherapy and radiation therapy. Combining immunotherapy with DNA-damaging treatments may enhance the immune response against cancer cells.</li> <li>3. Potential Synergy with PARP Inhibitors: BRCA1/2-mutated tumors are known to be sensitive to poly (ADP-ribose) polymerase (PARP) inhibitors, which exploit the cancer cells' DNA repair defects. Combining PARP inhibitors with immunotherapy is being explored as a potential strategy to improve treatment response in patients with BRCA1/2 mutations.</li> <li>4. Variability in Response: While BRCA1/2 mutations may influence response to immunotherapy, individual responses can still vary depending on various factors, including tumor type, tumor microenvironment, immune cell infiltration, and other genetic alterations present in the tumor.</li> </ol> <p>It's important to note that the impact of BRCA1/2 mutations on immunotherapy response and prognosis can differ among different cancer types. BRCA1/2 mutations are well-known in breast and ovarian cancers, but their impact in other cancer types is still being studied.</p> <p>Ultimately, treatment decisions and prognosis for patients with BRCA1/2 mutations receiving immunotherapy should be based on a comprehensive assessment of multiple factors, including the specific cancer type, individual patient characteristics, and the current evidence available. Close collaboration with healthcare professionals is crucial to personalized treatment planning and decision-making.</p> | <p>The impact of BRCA1/2 mutations on response to immunotherapy and prognosis in cancer patients is an area of ongoing research. While the relationship between BRCA1/2 mutations and immunotherapy response is not fully understood, here are some general considerations:</p> <ol style="list-style-type: none"> <li>1. Tumor Mutational Burden (TMB): BRCA1/2 mutations can lead to defects in DNA repair mechanisms, resulting in genomic instability and potentially higher tumor mutational burden (TMB). Tumors with higher TMB may have a greater likelihood of producing neoantigens, which can make them more recognizable to the immune system and potentially increase the response to immunotherapy.</li> <li>2. Homologous Recombination Deficiency (HRD): BRCA1/2 mutations are associated with a form of DNA repair deficiency known as homologous recombination deficiency (HRD). HRD has been suggested to enhance the sensitivity of tumors to DNA-damaging agents, including some types of chemotherapy and radiation therapy. It is still under investigation whether this DNA repair defect and associated HRD status impact response to immunotherapy.</li> <li>3. Potential Sensitivity to PARP Inhibitors: BRCA1/2-mutated tumors are known to be sensitive to poly (ADP-ribose) polymerase (PARP) inhibitors, which exploit the cancer cells' DNA repair defects. The combination of PARP inhibitors with immunotherapy is being explored as a potential strategy to improve treatment response in patients with BRCA1/2 mutations.</li> <li>4. Variability in Response: The impact of BRCA1/2 mutations on immunotherapy response can vary among different cancer types and even within subtypes of the same cancer. Other factors, such as the tumor microenvironment, immune cell infiltration, and the presence of other genetic alterations, can influence response to immunotherapy.</li> </ol> <p>It is important to note that the impact of BRCA1/2 mutations on immunotherapy response and prognosis can differ among different cancer types. BRCA1/2 mutations are well-known in breast and ovarian cancers, but their impact in other cancer types is still being studied.</p> <p>Ultimately, treatment decisions and prognosis for patients with BRCA1/2 mutations receiving immunotherapy should be based on a comprehensive assessment of multiple factors, including the specific cancer type, individual patient characteristics, and the current evidence available. Close collaboration with healthcare professionals is crucial to personalized treatment planning and decision-making.</p> |
|------------|----------------------------------------------------------------------------------------------------------------------------------------------------------------------------------------------------------------------------------------------------------------------------------------------------------------------------------------------------------------------------------------------------------------------------------------------------------------------------------------------------------------------------------------------------------------------------------------------------------------------------------------------------------------------------------------------------------------------------------------------------------------------------------------------------------------------------------------------------------------------------------------------------------------------------------------------------------------------------------------------------------------------------------------------------------------------------------------------------------------------------------------------------------------------------------------------------------------------------------------------------------------------------------------------------------------------------------------------------------------------------------------------------------------------------------------------------------------------------------------------------------------------------------------------------------------------------------------------------------------------------------------------------------------------------------------------------------------------------------------------------------------------------------------------------------------------------------------------------------------------------------------------------------------------------------------------------------------------------------------------------------------------------------------------------------------------------------------------------------------------------------------------------------------------------------------------------------------------------------------------------------------------------------------------------------------------------------------------------------------------------------------------------------------------------------------------------------------------------------------------------------------------------------------------|-----------------------------------------------------------------------------------------------------------------------------------------------------------------------------------------------------------------------------------------------------------------------------------------------------------------------------------------------------------------------------------------------------------------------------------------------------------------------------------------------------------------------------------------------------------------------------------------------------------------------------------------------------------------------------------------------------------------------------------------------------------------------------------------------------------------------------------------------------------------------------------------------------------------------------------------------------------------------------------------------------------------------------------------------------------------------------------------------------------------------------------------------------------------------------------------------------------------------------------------------------------------------------------------------------------------------------------------------------------------------------------------------------------------------------------------------------------------------------------------------------------------------------------------------------------------------------------------------------------------------------------------------------------------------------------------------------------------------------------------------------------------------------------------------------------------------------------------------------------------------------------------------------------------------------------------------------------------------------------------------------------------------------------------------------------------------------------------------------------------------------------------------------------------------------------------------------------------------------------------------------------------------------------------------------------------------------------------------------------------------------------------------------------------------------------------------------------------------------------------------------------------------------------------------------------|------------------------------------------------------------------------------------------------------------------------------------------------------------------------------------------------------------------------------------------------------------------------------------------------------------------------------------------------------------------------------------------------------------------------------------------------------------------------------------------------------------------------------------------------------------------------------------------------------------------------------------------------------------------------------------------------------------------------------------------------------------------------------------------------------------------------------------------------------------------------------------------------------------------------------------------------------------------------------------------------------------------------------------------------------------------------------------------------------------------------------------------------------------------------------------------------------------------------------------------------------------------------------------------------------------------------------------------------------------------------------------------------------------------------------------------------------------------------------------------------------------------------------------------------------------------------------------------------------------------------------------------------------------------------------------------------------------------------------------------------------------------------------------------------------------------------------------------------------------------------------------------------------------------------------------------------------------------------------------------------------------------------------------------------------------------------------------------------------------------------------------------------------------------------------------------------------------------------------------------------------------------------------------------------------------------------------------------------------------------------------------------------------------------------------------------------------------------------------------------------------------------------------------------------------------------------------------------------------------------------------------------|

|                   |                                                                                                                                                                                                                                                                                                                                                                                                                                                                                                                                                                                                                                                                                                                                                                                                                                                                                                                                                                                                                                                                                                                                                                                                                                                                                                                                                                                                                                                                                                                                                                                                                                                                                                                                                                                                                                                                                                                                                                                                                                                                                                                                                                                                                                                                                                                                                                                                                |                                                                                                                                                                                                                                                                                                                                                                                                                                                                                                                                                                                                                                                                                                                                                                                                                                                                                                                                                                                                                                                                                                                                                                                                                                                                                                                                                                                                                                                                                                                                                                                                                                                                                                                                                                                                                                                                                                                                                                                                                                                                                                                                                                                                                                                                                                                                                                                                      |                                                                                                                                                                                                                                                                                                                                                                                                                                                                                                                                                                                                                                                                                                                                                                                                                                                                                                                                                                                                                                                                                                                                                                                                                                                                                                                                                                                                                                                                                                                                                                                                                                                                                                                                                                                                                                                                                                                                                                                                                                                                                                                                                                                                                                                                                                                                                                                                                                                                                                                                                                                            |
|-------------------|----------------------------------------------------------------------------------------------------------------------------------------------------------------------------------------------------------------------------------------------------------------------------------------------------------------------------------------------------------------------------------------------------------------------------------------------------------------------------------------------------------------------------------------------------------------------------------------------------------------------------------------------------------------------------------------------------------------------------------------------------------------------------------------------------------------------------------------------------------------------------------------------------------------------------------------------------------------------------------------------------------------------------------------------------------------------------------------------------------------------------------------------------------------------------------------------------------------------------------------------------------------------------------------------------------------------------------------------------------------------------------------------------------------------------------------------------------------------------------------------------------------------------------------------------------------------------------------------------------------------------------------------------------------------------------------------------------------------------------------------------------------------------------------------------------------------------------------------------------------------------------------------------------------------------------------------------------------------------------------------------------------------------------------------------------------------------------------------------------------------------------------------------------------------------------------------------------------------------------------------------------------------------------------------------------------------------------------------------------------------------------------------------------------|------------------------------------------------------------------------------------------------------------------------------------------------------------------------------------------------------------------------------------------------------------------------------------------------------------------------------------------------------------------------------------------------------------------------------------------------------------------------------------------------------------------------------------------------------------------------------------------------------------------------------------------------------------------------------------------------------------------------------------------------------------------------------------------------------------------------------------------------------------------------------------------------------------------------------------------------------------------------------------------------------------------------------------------------------------------------------------------------------------------------------------------------------------------------------------------------------------------------------------------------------------------------------------------------------------------------------------------------------------------------------------------------------------------------------------------------------------------------------------------------------------------------------------------------------------------------------------------------------------------------------------------------------------------------------------------------------------------------------------------------------------------------------------------------------------------------------------------------------------------------------------------------------------------------------------------------------------------------------------------------------------------------------------------------------------------------------------------------------------------------------------------------------------------------------------------------------------------------------------------------------------------------------------------------------------------------------------------------------------------------------------------------------|--------------------------------------------------------------------------------------------------------------------------------------------------------------------------------------------------------------------------------------------------------------------------------------------------------------------------------------------------------------------------------------------------------------------------------------------------------------------------------------------------------------------------------------------------------------------------------------------------------------------------------------------------------------------------------------------------------------------------------------------------------------------------------------------------------------------------------------------------------------------------------------------------------------------------------------------------------------------------------------------------------------------------------------------------------------------------------------------------------------------------------------------------------------------------------------------------------------------------------------------------------------------------------------------------------------------------------------------------------------------------------------------------------------------------------------------------------------------------------------------------------------------------------------------------------------------------------------------------------------------------------------------------------------------------------------------------------------------------------------------------------------------------------------------------------------------------------------------------------------------------------------------------------------------------------------------------------------------------------------------------------------------------------------------------------------------------------------------------------------------------------------------------------------------------------------------------------------------------------------------------------------------------------------------------------------------------------------------------------------------------------------------------------------------------------------------------------------------------------------------------------------------------------------------------------------------------------------------|
| <p><b>Q53</b></p> | <p>The likelihood of a patient responding to further immunotherapy after relapse following a previous response to immunotherapy depends on several factors. Here are some considerations:</p> <ol style="list-style-type: none"> <li>1. Duration of Response: The fact that the patient had a durable response to immunotherapy for three years suggests that their immune system was capable of recognizing and controlling the melanoma cells. This suggests that the patient's immune system has the potential to respond to further immunotherapy.</li> <li>2. Time Since Completion of Treatment: The time interval between completion of the initial immunotherapy and relapse can provide some insight. A longer time interval since the completion of treatment may suggest a better chance of response to subsequent immunotherapy. However, it's important to note that the duration of response to previous treatment does not guarantee a similar response to subsequent treatment.</li> <li>3. Tumor Characteristics: The specific characteristics of the relapsed tumor, such as its genetic profile, tumor burden, and presence of specific mutations, can influence the likelihood of response to further immunotherapy. Some genetic alterations or changes in the tumor microenvironment may impact the tumor's susceptibility to immunotherapy.</li> <li>4. Treatment Options: The availability of different immunotherapy agents and combination treatment approaches can impact the likelihood of response. Newer immunotherapy agents and combination strategies may offer additional options for patients who have relapsed after prior treatment.</li> <li>5. Individual Variability: It's important to remember that each patient's response to treatment is individual, and it can vary. Some patients may have a robust response to further immunotherapy, while others may have limited or no response.</li> </ol> <p>Given the information provided, it is difficult to determine the precise likelihood of the patient responding to further immunotherapy. It would be best to consult with an oncologist who can assess the patient's specific case, consider the factors mentioned above, and discuss the available treatment options. Additional tests, such as molecular profiling of the tumor, may also provide valuable information for guiding treatment decisions.</p> | <p>In a patient with a history of metastatic melanoma who responded to immunotherapy but relapsed three years after completing the treatment, the likelihood of responding to further immunotherapy depends on several factors. These include:</p> <ol style="list-style-type: none"> <li>1. Duration of Previous Response: The fact that the patient had a durable response to immunotherapy for three years is a positive indicator. It suggests that their immune system was effective in controlling the melanoma cells. Patients who had a long-lasting response to previous immunotherapy are more likely to respond again.</li> <li>2. Time Since Relapse: The time interval between relapse and considering further immunotherapy can influence the likelihood of response. If the relapse occurred a significant time ago and the disease burden is relatively low, there may be a higher chance of response to subsequent immunotherapy.</li> <li>3. Tumor Characteristics: The specific characteristics of the relapsed tumor play a role. Factors such as tumor burden, location, genetic mutations, and the tumor microenvironment can impact the likelihood of response to immunotherapy. Certain genetic alterations or changes in the tumor biology may affect the tumor's sensitivity or resistance to immunotherapy.</li> <li>4. Treatment Options: The availability of different immunotherapy agents and combination therapies can impact the likelihood of response. There have been advancements in immunotherapy approaches, and new treatment options may provide additional benefit in relapsed cases.</li> <li>5. Individual Variability: Each patient's response to treatment is unique, and it can vary even in cases of relapsed disease. Some patients may continue to respond well to further immunotherapy, while others may have a reduced or no response.</li> </ol> <p>It is important to consult with an oncologist who can assess the specific case, consider the factors mentioned above, and discuss the available treatment options. Additional tests, such as molecular profiling of the tumor, may provide valuable information to guide treatment decisions. A personalized approach based on the individual patient's characteristics and the best available evidence is crucial in determining the likelihood of response to further immunotherapy.</p> | <p>In a patient with a history of metastatic melanoma who previously responded to immunotherapy but has now relapsed three years post-treatment, the likelihood of responding to further immunotherapy is variable and depends on several factors. These factors include:</p> <ol style="list-style-type: none"> <li>1. Duration of Previous Response: The fact that the patient had a durable response to immunotherapy for three years is a positive indicator. It suggests that their immune system was capable of effectively controlling the melanoma cells. Patients who had a long-lasting response to previous immunotherapy tend to have a higher likelihood of responding again.</li> <li>2. Time Since Relapse: The time interval between relapse and considering further immunotherapy can influence the likelihood of response. If the relapse occurred a considerable time ago and the disease burden is relatively low, there may be a higher chance of response to subsequent immunotherapy.</li> <li>3. Tumor Characteristics: The specific characteristics of the relapsed tumor, such as its genetic profile, tumor burden, and presence of specific mutations, can impact the likelihood of response to further immunotherapy. Some genetic alterations or changes in the tumor microenvironment may affect the tumor's susceptibility to immunotherapy.</li> <li>4. Treatment Options: The availability of different immunotherapy agents and combination treatment approaches can impact the likelihood of response. Newer immunotherapy agents and combination strategies may offer additional options for patients who have relapsed after prior treatment.</li> <li>5. Individual Variability: Each patient's response to treatment is individual and can vary. While some patients may continue to respond well to further immunotherapy, others may have a reduced or no response.</li> </ol> <p>Given the information provided, it is challenging to determine the precise likelihood of the patient responding to further immunotherapy. It is crucial to consult with an oncologist who can assess the patient's specific case, consider the factors mentioned above, and discuss the available treatment options. Additional tests, such as molecular profiling of the tumor, may provide valuable information for guiding treatment decisions. A personalized approach, taking into account the patient's individual characteristics and the best available evidence, is essential in determining the likelihood of response to further immunotherapy.</p> |
|-------------------|----------------------------------------------------------------------------------------------------------------------------------------------------------------------------------------------------------------------------------------------------------------------------------------------------------------------------------------------------------------------------------------------------------------------------------------------------------------------------------------------------------------------------------------------------------------------------------------------------------------------------------------------------------------------------------------------------------------------------------------------------------------------------------------------------------------------------------------------------------------------------------------------------------------------------------------------------------------------------------------------------------------------------------------------------------------------------------------------------------------------------------------------------------------------------------------------------------------------------------------------------------------------------------------------------------------------------------------------------------------------------------------------------------------------------------------------------------------------------------------------------------------------------------------------------------------------------------------------------------------------------------------------------------------------------------------------------------------------------------------------------------------------------------------------------------------------------------------------------------------------------------------------------------------------------------------------------------------------------------------------------------------------------------------------------------------------------------------------------------------------------------------------------------------------------------------------------------------------------------------------------------------------------------------------------------------------------------------------------------------------------------------------------------------|------------------------------------------------------------------------------------------------------------------------------------------------------------------------------------------------------------------------------------------------------------------------------------------------------------------------------------------------------------------------------------------------------------------------------------------------------------------------------------------------------------------------------------------------------------------------------------------------------------------------------------------------------------------------------------------------------------------------------------------------------------------------------------------------------------------------------------------------------------------------------------------------------------------------------------------------------------------------------------------------------------------------------------------------------------------------------------------------------------------------------------------------------------------------------------------------------------------------------------------------------------------------------------------------------------------------------------------------------------------------------------------------------------------------------------------------------------------------------------------------------------------------------------------------------------------------------------------------------------------------------------------------------------------------------------------------------------------------------------------------------------------------------------------------------------------------------------------------------------------------------------------------------------------------------------------------------------------------------------------------------------------------------------------------------------------------------------------------------------------------------------------------------------------------------------------------------------------------------------------------------------------------------------------------------------------------------------------------------------------------------------------------------|--------------------------------------------------------------------------------------------------------------------------------------------------------------------------------------------------------------------------------------------------------------------------------------------------------------------------------------------------------------------------------------------------------------------------------------------------------------------------------------------------------------------------------------------------------------------------------------------------------------------------------------------------------------------------------------------------------------------------------------------------------------------------------------------------------------------------------------------------------------------------------------------------------------------------------------------------------------------------------------------------------------------------------------------------------------------------------------------------------------------------------------------------------------------------------------------------------------------------------------------------------------------------------------------------------------------------------------------------------------------------------------------------------------------------------------------------------------------------------------------------------------------------------------------------------------------------------------------------------------------------------------------------------------------------------------------------------------------------------------------------------------------------------------------------------------------------------------------------------------------------------------------------------------------------------------------------------------------------------------------------------------------------------------------------------------------------------------------------------------------------------------------------------------------------------------------------------------------------------------------------------------------------------------------------------------------------------------------------------------------------------------------------------------------------------------------------------------------------------------------------------------------------------------------------------------------------------------------|

|                   |                                                                                                                                                                                                                                                                                                                                                                                                                                                                                                                                                                                                                                                                                                                                                                                                                                                                                                                                                                                                                                                                                                                                                                                                                                                                                                                                                                                                                                                                                                                                                                                                                                                                                                                                                                                                                                                                                                                                                                                                                                                                                                                                                                                                                                                                                                                                                                                                                                                                                                                                            |                                                                                                                                                                                                                                                                                                                                                                                                                                                                                                                                                                                                                                                                                                                                                                                                                                                                                                                                                                                                                                                                                                                                                                                                                                                                                                                                                                                                                                                                                                                                                                                                                                                                                                                                                                                                                                                                                                                                                                                                                                                                                                                                                                                                                                                                                                                                                                                                                                                                                                                                                                                                                                                                                                                                                                                                                                                                                                              |                                                                                                                                                                                                                                                                                                                                                                                                                                                                                                                                                                                                                                                                                                                                                                                                                                                                                                                                                                                                                                                                                                                                                                                                                                                                                                                                                                                                                                                                                                                                                                                                                                                                                                                                                                                                                                                                                                                                                                                                                                                                                                                                                                                                                                                                                                                                                                                                                                                                                                                                                                                                                                                                      |
|-------------------|--------------------------------------------------------------------------------------------------------------------------------------------------------------------------------------------------------------------------------------------------------------------------------------------------------------------------------------------------------------------------------------------------------------------------------------------------------------------------------------------------------------------------------------------------------------------------------------------------------------------------------------------------------------------------------------------------------------------------------------------------------------------------------------------------------------------------------------------------------------------------------------------------------------------------------------------------------------------------------------------------------------------------------------------------------------------------------------------------------------------------------------------------------------------------------------------------------------------------------------------------------------------------------------------------------------------------------------------------------------------------------------------------------------------------------------------------------------------------------------------------------------------------------------------------------------------------------------------------------------------------------------------------------------------------------------------------------------------------------------------------------------------------------------------------------------------------------------------------------------------------------------------------------------------------------------------------------------------------------------------------------------------------------------------------------------------------------------------------------------------------------------------------------------------------------------------------------------------------------------------------------------------------------------------------------------------------------------------------------------------------------------------------------------------------------------------------------------------------------------------------------------------------------------------|--------------------------------------------------------------------------------------------------------------------------------------------------------------------------------------------------------------------------------------------------------------------------------------------------------------------------------------------------------------------------------------------------------------------------------------------------------------------------------------------------------------------------------------------------------------------------------------------------------------------------------------------------------------------------------------------------------------------------------------------------------------------------------------------------------------------------------------------------------------------------------------------------------------------------------------------------------------------------------------------------------------------------------------------------------------------------------------------------------------------------------------------------------------------------------------------------------------------------------------------------------------------------------------------------------------------------------------------------------------------------------------------------------------------------------------------------------------------------------------------------------------------------------------------------------------------------------------------------------------------------------------------------------------------------------------------------------------------------------------------------------------------------------------------------------------------------------------------------------------------------------------------------------------------------------------------------------------------------------------------------------------------------------------------------------------------------------------------------------------------------------------------------------------------------------------------------------------------------------------------------------------------------------------------------------------------------------------------------------------------------------------------------------------------------------------------------------------------------------------------------------------------------------------------------------------------------------------------------------------------------------------------------------------------------------------------------------------------------------------------------------------------------------------------------------------------------------------------------------------------------------------------------------------|----------------------------------------------------------------------------------------------------------------------------------------------------------------------------------------------------------------------------------------------------------------------------------------------------------------------------------------------------------------------------------------------------------------------------------------------------------------------------------------------------------------------------------------------------------------------------------------------------------------------------------------------------------------------------------------------------------------------------------------------------------------------------------------------------------------------------------------------------------------------------------------------------------------------------------------------------------------------------------------------------------------------------------------------------------------------------------------------------------------------------------------------------------------------------------------------------------------------------------------------------------------------------------------------------------------------------------------------------------------------------------------------------------------------------------------------------------------------------------------------------------------------------------------------------------------------------------------------------------------------------------------------------------------------------------------------------------------------------------------------------------------------------------------------------------------------------------------------------------------------------------------------------------------------------------------------------------------------------------------------------------------------------------------------------------------------------------------------------------------------------------------------------------------------------------------------------------------------------------------------------------------------------------------------------------------------------------------------------------------------------------------------------------------------------------------------------------------------------------------------------------------------------------------------------------------------------------------------------------------------------------------------------------------------|
| <p><b>Q54</b></p> | <p>Sipuleucel-T (brand name Provenge) is an immunotherapy treatment approved for certain patients with advanced prostate cancer. It is designed to stimulate the patient's immune system to target and attack prostate cancer cells. The impact of sipuleucel-T therapy on prostate cancer prognosis can be understood in the following ways:</p> <ol style="list-style-type: none"> <li>1. Overall Survival Benefit: Sipuleucel-T has demonstrated a significant improvement in overall survival in clinical trials. In a pivotal phase III study, it showed a median overall survival benefit of approximately 4 months compared to placebo in patients with metastatic castration-resistant prostate cancer (mCRPC). This survival benefit indicates a positive impact on prognosis.</li> <li>2. Delayed Disease Progression: Sipuleucel-T therapy has been shown to delay disease progression in some patients. Although it may not result in tumor shrinkage or disappearance, it can slow down the progression of prostate cancer, potentially leading to a more favorable prognosis.</li> <li>3. Individual Response Variation: The response to sipuleucel-T therapy can vary among individuals. Some patients may experience a significant clinical benefit, including prolonged survival, while others may have a more limited response. The treatment response is influenced by several factors, such as the extent of disease, tumor biology, and the individual's immune system.</li> <li>4. Combination Therapy Potential: Sipuleucel-T can be used in combination with other treatments for prostate cancer, such as hormone therapy or chemotherapy. Combining sipuleucel-T with other therapies may have a synergistic effect and further improve prognosis by targeting the cancer through multiple mechanisms.</li> </ol> <p>It's important to note that the impact of sipuleucel-T on prognosis is primarily based on its demonstrated overall survival benefit. However, the specific impact can vary depending on individual patient factors, disease characteristics, and the stage of prostate cancer.</p> <p>When considering sipuleucel-T therapy for prostate cancer, it is crucial to consult with healthcare professionals who can evaluate the patient's specific case, consider the available evidence, and discuss the potential benefits and risks of the treatment. They can provide personalized guidance and help determine how sipuleucel-T therapy may impact the individual patient's prognosis.</p> | <p>Sipuleucel-T (brand name Provenge) is an immunotherapy treatment approved for certain patients with advanced prostate cancer. It is designed to stimulate the patient's immune system to target and attack prostate cancer cells. The impact of sipuleucel-T therapy on prostate cancer prognosis can be understood in the following ways:</p> <ol style="list-style-type: none"> <li>1. Overall Survival Benefit: Sipuleucel-T has shown a survival benefit in clinical trials. In a pivotal phase III study, it demonstrated a median overall survival benefit of approximately 4.1 months compared to placebo in patients with metastatic castration-resistant prostate cancer (mCRPC). This survival benefit indicates a positive impact on prognosis.</li> <li>2. Delayed Disease Progression: Sipuleucel-T therapy has been associated with a delay in disease progression in some patients. While it may not lead to tumor shrinkage or disappearance, it can slow down the progression of prostate cancer, which can have a positive impact on prognosis.</li> <li>3. Long-Term Survival: In addition to the overall survival benefit, sipuleucel-T has shown a subset of patients experiencing long-term survival benefits. Some patients have achieved long-term survival and durable responses, indicating a favorable impact on prognosis.</li> <li>4. Individual Response Variation: The response to sipuleucel-T therapy can vary among individuals. Some patients may experience a significant clinical benefit, including prolonged survival and improved quality of life, while others may have a more limited response. Factors such as tumor biology, disease characteristics, and individual patient factors can influence treatment response and overall prognosis.</li> <li>5. Combination Therapy Potential: Sipuleucel-T can be used in combination with other treatments for prostate cancer, such as hormone therapy or chemotherapy. Combining sipuleucel-T with other therapies may have a synergistic effect and further improve prognosis by targeting the cancer through multiple mechanisms.</li> </ol> <p>It's important to note that the impact of sipuleucel-T on prognosis is primarily based on its demonstrated overall survival benefit and delayed disease progression. However, the specific impact on an individual's prognosis can vary depending on various factors, including disease stage, tumor characteristics, and overall patient health.</p> <p>When considering sipuleucel-T therapy for prostate cancer, it is crucial to consult with healthcare professionals who can evaluate the patient's specific case, consider the available evidence, and discuss the potential benefits and risks of the treatment. They can provide personalized guidance and help determine how sipuleucel-T therapy may impact the individual patient's prognosis.</p> | <p>Sipuleucel-T (brand name Provenge) is an immunotherapy treatment approved for certain patients with advanced prostate cancer. It is designed to stimulate the patient's immune system to target and attack prostate cancer cells. The impact of sipuleucel-T therapy on prostate cancer prognosis can be summarized as follows:</p> <ol style="list-style-type: none"> <li>1. Overall Survival Benefit: Sipuleucel-T has been shown to provide a survival benefit in clinical trials. In a pivotal phase III study, it demonstrated an improvement in overall survival compared to placebo in patients with metastatic castration-resistant prostate cancer (mCRPC). This survival benefit suggests a positive impact on prognosis.</li> <li>2. Delayed Disease Progression: Sipuleucel-T therapy has been associated with a delay in disease progression in some patients. While it may not lead to tumor shrinkage or complete eradication, it can slow down the progression of prostate cancer. Slowing disease progression can have a positive impact on prognosis by extending the time before the disease worsens.</li> <li>3. Individual Response Variation: The response to sipuleucel-T therapy can vary among individuals. Some patients may experience a significant clinical benefit, including prolonged survival, while others may have a more limited response. Factors such as tumor characteristics, overall health, and individual immune response can influence the treatment response and subsequent prognosis.</li> <li>4. Combination Therapy Potential: Sipuleucel-T can be used in combination with other treatments for prostate cancer, such as hormone therapy or chemotherapy. Combining sipuleucel-T with other therapies may have a synergistic effect and further improve prognosis by targeting the cancer through multiple mechanisms.</li> </ol> <p>It is important to note that the impact of sipuleucel-T on prognosis can vary depending on individual patient factors, disease characteristics, and the stage of prostate cancer. The treatment response and overall prognosis may also be influenced by factors such as the presence of other genetic mutations, tumor burden, and the overall health of the patient.</p> <p>When considering sipuleucel-T therapy for prostate cancer, it is essential to consult with healthcare professionals who can evaluate the specific case, consider the available evidence, and discuss the potential benefits and risks of the treatment. They can provide personalized guidance and help determine how sipuleucel-T therapy may impact the individual patient's prognosis.</p> |
|-------------------|--------------------------------------------------------------------------------------------------------------------------------------------------------------------------------------------------------------------------------------------------------------------------------------------------------------------------------------------------------------------------------------------------------------------------------------------------------------------------------------------------------------------------------------------------------------------------------------------------------------------------------------------------------------------------------------------------------------------------------------------------------------------------------------------------------------------------------------------------------------------------------------------------------------------------------------------------------------------------------------------------------------------------------------------------------------------------------------------------------------------------------------------------------------------------------------------------------------------------------------------------------------------------------------------------------------------------------------------------------------------------------------------------------------------------------------------------------------------------------------------------------------------------------------------------------------------------------------------------------------------------------------------------------------------------------------------------------------------------------------------------------------------------------------------------------------------------------------------------------------------------------------------------------------------------------------------------------------------------------------------------------------------------------------------------------------------------------------------------------------------------------------------------------------------------------------------------------------------------------------------------------------------------------------------------------------------------------------------------------------------------------------------------------------------------------------------------------------------------------------------------------------------------------------------|--------------------------------------------------------------------------------------------------------------------------------------------------------------------------------------------------------------------------------------------------------------------------------------------------------------------------------------------------------------------------------------------------------------------------------------------------------------------------------------------------------------------------------------------------------------------------------------------------------------------------------------------------------------------------------------------------------------------------------------------------------------------------------------------------------------------------------------------------------------------------------------------------------------------------------------------------------------------------------------------------------------------------------------------------------------------------------------------------------------------------------------------------------------------------------------------------------------------------------------------------------------------------------------------------------------------------------------------------------------------------------------------------------------------------------------------------------------------------------------------------------------------------------------------------------------------------------------------------------------------------------------------------------------------------------------------------------------------------------------------------------------------------------------------------------------------------------------------------------------------------------------------------------------------------------------------------------------------------------------------------------------------------------------------------------------------------------------------------------------------------------------------------------------------------------------------------------------------------------------------------------------------------------------------------------------------------------------------------------------------------------------------------------------------------------------------------------------------------------------------------------------------------------------------------------------------------------------------------------------------------------------------------------------------------------------------------------------------------------------------------------------------------------------------------------------------------------------------------------------------------------------------------------------|----------------------------------------------------------------------------------------------------------------------------------------------------------------------------------------------------------------------------------------------------------------------------------------------------------------------------------------------------------------------------------------------------------------------------------------------------------------------------------------------------------------------------------------------------------------------------------------------------------------------------------------------------------------------------------------------------------------------------------------------------------------------------------------------------------------------------------------------------------------------------------------------------------------------------------------------------------------------------------------------------------------------------------------------------------------------------------------------------------------------------------------------------------------------------------------------------------------------------------------------------------------------------------------------------------------------------------------------------------------------------------------------------------------------------------------------------------------------------------------------------------------------------------------------------------------------------------------------------------------------------------------------------------------------------------------------------------------------------------------------------------------------------------------------------------------------------------------------------------------------------------------------------------------------------------------------------------------------------------------------------------------------------------------------------------------------------------------------------------------------------------------------------------------------------------------------------------------------------------------------------------------------------------------------------------------------------------------------------------------------------------------------------------------------------------------------------------------------------------------------------------------------------------------------------------------------------------------------------------------------------------------------------------------------|

|                   |                                                                                                                                                                                                                                                                                                                                                                                                                                                                                                                                                                                                                                                                                                                                                                                                                                                                                                                                                                                                                                                                                                                                                                                                                                                                                                                                                                                                                                                                                                                                                                                                                                                                                                                                                                                                                                                                                                                                                                                                                                                                                                                                                                                                                                                                                                                                                                                                                   |                                                                                                                                                                                                                                                                                                                                                                                                                                                                                                                                                                                                                                                                                                                                                                                                                                                                                                                                                                                                                                                                                                                                                                                                                                                                                                                                                                                                                                                                                                                                                                                                                                                                                                                                                                                                                                                                                                                                                                                                                                                                                                                                                                                                                                                                                                                                                                                                                                                                                                                                                                                                                                                                                  |                                                                                                                                                                                                                                                                                                                                                                                                                                                                                                                                                                                                                                                                                                                                                                                                                                                                                                                                                                                                                                                                                                                                                                                                                                                                                                                                                                                                                                                                                                                                                                                                                                                                                                                                                                                                                                                                                                                                                                                                                                                                                                                                                                                                                                                                                                                                                                                                                                                                                                                                                                                                                                                    |
|-------------------|-------------------------------------------------------------------------------------------------------------------------------------------------------------------------------------------------------------------------------------------------------------------------------------------------------------------------------------------------------------------------------------------------------------------------------------------------------------------------------------------------------------------------------------------------------------------------------------------------------------------------------------------------------------------------------------------------------------------------------------------------------------------------------------------------------------------------------------------------------------------------------------------------------------------------------------------------------------------------------------------------------------------------------------------------------------------------------------------------------------------------------------------------------------------------------------------------------------------------------------------------------------------------------------------------------------------------------------------------------------------------------------------------------------------------------------------------------------------------------------------------------------------------------------------------------------------------------------------------------------------------------------------------------------------------------------------------------------------------------------------------------------------------------------------------------------------------------------------------------------------------------------------------------------------------------------------------------------------------------------------------------------------------------------------------------------------------------------------------------------------------------------------------------------------------------------------------------------------------------------------------------------------------------------------------------------------------------------------------------------------------------------------------------------------|----------------------------------------------------------------------------------------------------------------------------------------------------------------------------------------------------------------------------------------------------------------------------------------------------------------------------------------------------------------------------------------------------------------------------------------------------------------------------------------------------------------------------------------------------------------------------------------------------------------------------------------------------------------------------------------------------------------------------------------------------------------------------------------------------------------------------------------------------------------------------------------------------------------------------------------------------------------------------------------------------------------------------------------------------------------------------------------------------------------------------------------------------------------------------------------------------------------------------------------------------------------------------------------------------------------------------------------------------------------------------------------------------------------------------------------------------------------------------------------------------------------------------------------------------------------------------------------------------------------------------------------------------------------------------------------------------------------------------------------------------------------------------------------------------------------------------------------------------------------------------------------------------------------------------------------------------------------------------------------------------------------------------------------------------------------------------------------------------------------------------------------------------------------------------------------------------------------------------------------------------------------------------------------------------------------------------------------------------------------------------------------------------------------------------------------------------------------------------------------------------------------------------------------------------------------------------------------------------------------------------------------------------------------------------------|----------------------------------------------------------------------------------------------------------------------------------------------------------------------------------------------------------------------------------------------------------------------------------------------------------------------------------------------------------------------------------------------------------------------------------------------------------------------------------------------------------------------------------------------------------------------------------------------------------------------------------------------------------------------------------------------------------------------------------------------------------------------------------------------------------------------------------------------------------------------------------------------------------------------------------------------------------------------------------------------------------------------------------------------------------------------------------------------------------------------------------------------------------------------------------------------------------------------------------------------------------------------------------------------------------------------------------------------------------------------------------------------------------------------------------------------------------------------------------------------------------------------------------------------------------------------------------------------------------------------------------------------------------------------------------------------------------------------------------------------------------------------------------------------------------------------------------------------------------------------------------------------------------------------------------------------------------------------------------------------------------------------------------------------------------------------------------------------------------------------------------------------------------------------------------------------------------------------------------------------------------------------------------------------------------------------------------------------------------------------------------------------------------------------------------------------------------------------------------------------------------------------------------------------------------------------------------------------------------------------------------------------------|
| <p><b>Q55</b></p> | <p>A patient with PD-L1 positive squamous cell lung cancer who experiences a complete radiological response to Pembrolizumab and completes two years of therapy has achieved a positive treatment outcome. However, it's important to note that predicting long-term prognosis is challenging and depends on several factors, including:</p> <ol style="list-style-type: none"> <li>1. Durability of Response: The fact that the patient achieved a complete radiological response to Pembrolizumab is a positive indicator. Complete responses suggest that the tumor has been effectively controlled and potentially eradicated. Sustained response over time is associated with a better long-term prognosis.</li> <li>2. Disease Recurrence: Despite achieving a complete response, there is still a possibility of disease recurrence. Lung cancer can be a complex disease, and even after a complete response, microscopic cancer cells may still be present. Long-term prognosis can be influenced by the duration of response and the absence or presence of disease recurrence.</li> <li>3. Overall Health: The patient's overall health and ability to tolerate treatment, as well as their underlying medical conditions, play a role in long-term prognosis. A patient in good overall health may have a better prognosis compared to someone with significant comorbidities.</li> <li>4. Immune System Response: The patient's immune system plays a crucial role in fighting cancer cells and preventing disease recurrence. A robust and sustained immune response may contribute to long-term disease control.</li> <li>5. Other Factors: Other factors such as tumor stage at diagnosis, presence of specific genetic mutations, and patient-specific characteristics can also influence long-term prognosis.</li> </ol> <p>It's important to have regular follow-up visits with the oncologist to monitor for any signs of disease recurrence or progression. The oncologist can provide more specific information regarding the patient's long-term prognosis based on their individual case and response to treatment.</p> <p>While achieving a complete radiological response to Pembrolizumab is an encouraging sign, the prediction of long-term prognosis is complex and requires ongoing monitoring and evaluation by healthcare professionals experienced in managing lung cancer.</p> | <p>A patient with PD-L1 positive squamous cell lung cancer who experiences a complete radiological response to Pembrolizumab and completes two years of therapy has achieved a positive treatment outcome. However, predicting long-term prognosis is challenging and depends on several factors, including:</p> <ol style="list-style-type: none"> <li>1. Durability of Response: The fact that the patient achieved a complete radiological response to Pembrolizumab is a positive indicator. Complete responses suggest that the tumor has been effectively controlled, and there is no detectable evidence of disease. Sustained response over time is generally associated with a better long-term prognosis.</li> <li>2. Disease Recurrence: Despite achieving a complete response, there is always a possibility of disease recurrence. Lung cancer can be a complex disease, and even after a complete response, microscopic cancer cells may still be present. Long-term prognosis can be influenced by the duration of response and the absence or presence of disease recurrence in the future.</li> <li>3. Overall Health: The patient's overall health and well-being, as well as their ability to tolerate treatment and any other underlying medical conditions, can impact long-term prognosis. Good overall health is generally associated with a better prognosis.</li> <li>4. Immune System Response: The patient's immune system plays a crucial role in fighting cancer cells and preventing disease recurrence. A robust and sustained immune response may contribute to long-term disease control. However, the duration and strength of immune response can vary among individuals.</li> <li>5. Other Factors: Other factors such as tumor stage at diagnosis, presence of specific genetic mutations, and patient-specific characteristics can also influence long-term prognosis.</li> </ol> <p>It's important to note that while achieving a complete radiological response is a positive outcome, the prediction of long-term prognosis is complex and requires ongoing monitoring and evaluation by healthcare professionals experienced in managing lung cancer. Regular follow-up visits and imaging studies are necessary to monitor for any signs of disease recurrence or progression.</p> <p>Ultimately, the patient's long-term prognosis will depend on various individual factors and how the disease progresses over time. Consultation with the oncologist who is familiar with the patient's case and has access to the latest clinical information is essential to provide a more accurate assessment of the long-term prognosis.</p> | <p>A patient with PD-L1 positive squamous cell lung cancer who experiences a complete radiological response to Pembrolizumab and completes two years of therapy has achieved a favorable treatment outcome. While predicting long-term prognosis is challenging and depends on various factors, there are some general considerations:</p> <ol style="list-style-type: none"> <li>1. Durability of Response: The fact that the patient achieved a complete radiological response to Pembrolizumab is a positive indicator. Complete responses suggest that the tumor has been effectively controlled, and there is no detectable evidence of disease. Sustained response over time is typically associated with a better long-term prognosis.</li> <li>2. Disease Recurrence: Despite achieving a complete response, there is always a possibility of disease recurrence. Lung cancer can be a complex disease, and even after a complete response, microscopic cancer cells may still be present. Long-term prognosis can be influenced by the duration of response and the absence or presence of disease recurrence in the future.</li> <li>3. Overall Health: The patient's overall health and well-being, as well as any other underlying medical conditions, can impact long-term prognosis. Good overall health is generally associated with a better prognosis.</li> <li>4. Immune System Response: The patient's immune system plays a crucial role in fighting cancer cells and preventing disease recurrence. A robust and sustained immune response may contribute to long-term disease control. However, the duration and strength of immune response can vary among individuals.</li> <li>5. Other Factors: Other factors such as tumor stage at diagnosis, presence of specific genetic mutations, and patient-specific characteristics can also influence long-term prognosis.</li> </ol> <p>It's important to note that while achieving a complete radiological response is a positive outcome, the prediction of long-term prognosis is complex and requires ongoing monitoring and evaluation by healthcare professionals experienced in managing lung cancer. Regular follow-up visits and imaging studies are necessary to monitor for any signs of disease recurrence or progression.</p> <p>Consultation with the oncologist who is familiar with the patient's case and has access to the latest clinical information is crucial to provide a more accurate assessment of the long-term prognosis. They can provide personalized guidance based on the individual patient's characteristics and response to treatment.</p> |
|-------------------|-------------------------------------------------------------------------------------------------------------------------------------------------------------------------------------------------------------------------------------------------------------------------------------------------------------------------------------------------------------------------------------------------------------------------------------------------------------------------------------------------------------------------------------------------------------------------------------------------------------------------------------------------------------------------------------------------------------------------------------------------------------------------------------------------------------------------------------------------------------------------------------------------------------------------------------------------------------------------------------------------------------------------------------------------------------------------------------------------------------------------------------------------------------------------------------------------------------------------------------------------------------------------------------------------------------------------------------------------------------------------------------------------------------------------------------------------------------------------------------------------------------------------------------------------------------------------------------------------------------------------------------------------------------------------------------------------------------------------------------------------------------------------------------------------------------------------------------------------------------------------------------------------------------------------------------------------------------------------------------------------------------------------------------------------------------------------------------------------------------------------------------------------------------------------------------------------------------------------------------------------------------------------------------------------------------------------------------------------------------------------------------------------------------------|----------------------------------------------------------------------------------------------------------------------------------------------------------------------------------------------------------------------------------------------------------------------------------------------------------------------------------------------------------------------------------------------------------------------------------------------------------------------------------------------------------------------------------------------------------------------------------------------------------------------------------------------------------------------------------------------------------------------------------------------------------------------------------------------------------------------------------------------------------------------------------------------------------------------------------------------------------------------------------------------------------------------------------------------------------------------------------------------------------------------------------------------------------------------------------------------------------------------------------------------------------------------------------------------------------------------------------------------------------------------------------------------------------------------------------------------------------------------------------------------------------------------------------------------------------------------------------------------------------------------------------------------------------------------------------------------------------------------------------------------------------------------------------------------------------------------------------------------------------------------------------------------------------------------------------------------------------------------------------------------------------------------------------------------------------------------------------------------------------------------------------------------------------------------------------------------------------------------------------------------------------------------------------------------------------------------------------------------------------------------------------------------------------------------------------------------------------------------------------------------------------------------------------------------------------------------------------------------------------------------------------------------------------------------------------|----------------------------------------------------------------------------------------------------------------------------------------------------------------------------------------------------------------------------------------------------------------------------------------------------------------------------------------------------------------------------------------------------------------------------------------------------------------------------------------------------------------------------------------------------------------------------------------------------------------------------------------------------------------------------------------------------------------------------------------------------------------------------------------------------------------------------------------------------------------------------------------------------------------------------------------------------------------------------------------------------------------------------------------------------------------------------------------------------------------------------------------------------------------------------------------------------------------------------------------------------------------------------------------------------------------------------------------------------------------------------------------------------------------------------------------------------------------------------------------------------------------------------------------------------------------------------------------------------------------------------------------------------------------------------------------------------------------------------------------------------------------------------------------------------------------------------------------------------------------------------------------------------------------------------------------------------------------------------------------------------------------------------------------------------------------------------------------------------------------------------------------------------------------------------------------------------------------------------------------------------------------------------------------------------------------------------------------------------------------------------------------------------------------------------------------------------------------------------------------------------------------------------------------------------------------------------------------------------------------------------------------------------|



|            |                                                                                                                                                                                                                                                                                                                                                                                                                                                                                                                                                                                                                                                                                                                                                                                                                                                                                                                                                                                                                                                                                                                                                                                                                                                                                                                                                                                                                                                                                                                                                                                                                                                                                                                                                                                                                                                                                                                                                                                                                                                                                                                                                                                                                                                                                                                                            |                                                                                                                                                                                                                                                                                                                                                                                                                                                                                                                                                                                                                                                                                                                                                                                                                                                                                                                                                                                                                                                                                                                                                                                                                                                                                                                                                                                                                                                                                                                                                                                                                                                                                                                                                                                                                                                                                                                                                                                                                                                                                                                                                                                                                                                                                                                |                                                                                                                                                                                                                                                                                                                                                                                                                                                                                                                                                                                                                                                                                                                                                                                                                                                                                                                                                                                                                                                                                                                                                                                                                                                                                                                                                                                                                                                                                                                                                                                                                                                                                                                                                                                                                                                                                                                                                                                                                                                                                                                                                                                                                                                                                                                     |
|------------|--------------------------------------------------------------------------------------------------------------------------------------------------------------------------------------------------------------------------------------------------------------------------------------------------------------------------------------------------------------------------------------------------------------------------------------------------------------------------------------------------------------------------------------------------------------------------------------------------------------------------------------------------------------------------------------------------------------------------------------------------------------------------------------------------------------------------------------------------------------------------------------------------------------------------------------------------------------------------------------------------------------------------------------------------------------------------------------------------------------------------------------------------------------------------------------------------------------------------------------------------------------------------------------------------------------------------------------------------------------------------------------------------------------------------------------------------------------------------------------------------------------------------------------------------------------------------------------------------------------------------------------------------------------------------------------------------------------------------------------------------------------------------------------------------------------------------------------------------------------------------------------------------------------------------------------------------------------------------------------------------------------------------------------------------------------------------------------------------------------------------------------------------------------------------------------------------------------------------------------------------------------------------------------------------------------------------------------------|----------------------------------------------------------------------------------------------------------------------------------------------------------------------------------------------------------------------------------------------------------------------------------------------------------------------------------------------------------------------------------------------------------------------------------------------------------------------------------------------------------------------------------------------------------------------------------------------------------------------------------------------------------------------------------------------------------------------------------------------------------------------------------------------------------------------------------------------------------------------------------------------------------------------------------------------------------------------------------------------------------------------------------------------------------------------------------------------------------------------------------------------------------------------------------------------------------------------------------------------------------------------------------------------------------------------------------------------------------------------------------------------------------------------------------------------------------------------------------------------------------------------------------------------------------------------------------------------------------------------------------------------------------------------------------------------------------------------------------------------------------------------------------------------------------------------------------------------------------------------------------------------------------------------------------------------------------------------------------------------------------------------------------------------------------------------------------------------------------------------------------------------------------------------------------------------------------------------------------------------------------------------------------------------------------------|---------------------------------------------------------------------------------------------------------------------------------------------------------------------------------------------------------------------------------------------------------------------------------------------------------------------------------------------------------------------------------------------------------------------------------------------------------------------------------------------------------------------------------------------------------------------------------------------------------------------------------------------------------------------------------------------------------------------------------------------------------------------------------------------------------------------------------------------------------------------------------------------------------------------------------------------------------------------------------------------------------------------------------------------------------------------------------------------------------------------------------------------------------------------------------------------------------------------------------------------------------------------------------------------------------------------------------------------------------------------------------------------------------------------------------------------------------------------------------------------------------------------------------------------------------------------------------------------------------------------------------------------------------------------------------------------------------------------------------------------------------------------------------------------------------------------------------------------------------------------------------------------------------------------------------------------------------------------------------------------------------------------------------------------------------------------------------------------------------------------------------------------------------------------------------------------------------------------------------------------------------------------------------------------------------------------|
| <p>Q56</p> | <p>The progressive, patchy whitening of the skin reported by a patient receiving Ipilimumab and Nivolumab for metastatic melanoma may be a side effect known as vitiligo. Vitiligo is an autoimmune condition in which the immune system attacks and destroys melanocytes, resulting in depigmented patches on the skin. While the impact of vitiligo on prognosis in patients receiving immunotherapy can vary, here are some considerations:</p> <ol style="list-style-type: none"> <li>1. Tumor Response: The development of vitiligo has been associated with a favorable response to immunotherapy in some studies. It has been suggested that the immune system's ability to attack melanocytes may indicate a stronger immune response against melanoma cells as well. Therefore, the presence of vitiligo may be indicative of a positive treatment response and potentially improved prognosis.</li> <li>2. Immune Activation: Vitiligo is believed to occur due to immune activation and the immune system's recognition of self-antigens on melanocytes. This immune activation may also contribute to the immune response against melanoma cells, potentially leading to better disease control and prognosis.</li> <li>3. Adverse Events Profile: Vitiligo is generally considered a manageable side effect of immunotherapy, and it does not typically cause significant discomfort or impact overall health. However, it is essential to monitor for any other potential adverse events or autoimmune reactions.</li> <li>4. Individual Variability: The impact of vitiligo on prognosis can vary among individuals. It is influenced by factors such as the extent of vitiligo, the patient's overall response to immunotherapy, and other patient-specific characteristics.</li> </ol> <p>While the development of vitiligo may have positive implications for treatment response and prognosis, it is essential to consult with the healthcare team to evaluate the individual patient's case. They can provide a more accurate assessment of the impact on prognosis based on the patient's specific situation, including tumor response and other relevant factors. Regular follow-up visits and communication with the healthcare team are crucial for monitoring and managing any side effects of immunotherapy.</p> | <p>The progressive, patchy whitening of the skin reported by a patient receiving Ipilimumab and Nivolumab for metastatic melanoma is likely a side effect called vitiligo. Vitiligo is an autoimmune condition where the immune system attacks and destroys melanocytes, resulting in depigmented patches on the skin. The impact of vitiligo on prognosis in patients receiving immunotherapy can vary, but here are some considerations:</p> <ol style="list-style-type: none"> <li>1. Tumor Response: The development of vitiligo has been associated with a positive treatment response in some studies. It has been suggested that the immune system's recognition of melanocytes may indicate a stronger immune response against melanoma cells as well. Therefore, the presence of vitiligo may be indicative of a favorable treatment response and potentially improved prognosis.</li> <li>2. Immune Activation: Vitiligo occurs due to immune activation and the immune system's recognition of self-antigens on melanocytes. This immune activation may also contribute to the immune response against melanoma cells, potentially leading to better disease control and prognosis.</li> <li>3. Adverse Events Profile: Vitiligo is generally considered a manageable side effect of immunotherapy, and it does not typically cause significant discomfort or impact overall health. However, it is important to monitor for any other potential adverse events or autoimmune reactions.</li> <li>4. Individual Variability: The impact of vitiligo on prognosis can vary among individuals. It is influenced by factors such as the extent of vitiligo, the patient's overall response to immunotherapy, and other patient-specific characteristics.</li> </ol> <p>While the development of vitiligo may have positive implications for treatment response and prognosis, it is crucial to consult with the healthcare team to evaluate the individual patient's case. They can provide a more accurate assessment of the impact on prognosis based on the patient's specific situation, including tumor response and other relevant factors. Regular follow-up visits and communication with the healthcare team are important for monitoring and managing any side effects of immunotherapy.</p> | <p>The progressive, patchy whitening of the skin reported by a patient receiving Ipilimumab and Nivolumab for metastatic melanoma is likely a side effect known as vitiligo. Vitiligo is an autoimmune condition where the immune system attacks and destroys melanocytes, resulting in depigmented patches on the skin.</p> <p>The impact of vitiligo on prognosis in patients receiving immunotherapy can vary, but here are some considerations:</p> <ol style="list-style-type: none"> <li>1. Tumor Response: The development of vitiligo has been associated with a positive treatment response in some studies. It has been suggested that the immune system's recognition of melanocytes may indicate a stronger immune response against melanoma cells as well. Therefore, the presence of vitiligo may be indicative of a favorable treatment response and potentially improved prognosis.</li> <li>2. Immune Activation: Vitiligo occurs due to immune activation and the immune system's recognition of self-antigens on melanocytes. This immune activation may also contribute to the immune response against melanoma cells, potentially leading to better disease control and prognosis.</li> <li>3. Adverse Events Profile: Vitiligo is generally considered a manageable side effect of immunotherapy and does not typically cause significant discomfort or impact overall health. However, it is important to monitor for any other potential adverse events or autoimmune reactions.</li> <li>4. Individual Variability: The impact of vitiligo on prognosis can vary among individuals. It is influenced by factors such as the extent of vitiligo, the patient's overall response to immunotherapy, and other patient-specific characteristics.</li> </ol> <p>While the development of vitiligo may have positive implications for treatment response and prognosis, it is crucial to consult with the healthcare team to evaluate the individual patient's case. They can provide a more accurate assessment of the impact on prognosis based on the patient's specific situation, including tumor response and other relevant factors. Regular follow-up visits and communication with the healthcare team are important for monitoring and managing any side effects of immunotherapy.</p> |
|------------|--------------------------------------------------------------------------------------------------------------------------------------------------------------------------------------------------------------------------------------------------------------------------------------------------------------------------------------------------------------------------------------------------------------------------------------------------------------------------------------------------------------------------------------------------------------------------------------------------------------------------------------------------------------------------------------------------------------------------------------------------------------------------------------------------------------------------------------------------------------------------------------------------------------------------------------------------------------------------------------------------------------------------------------------------------------------------------------------------------------------------------------------------------------------------------------------------------------------------------------------------------------------------------------------------------------------------------------------------------------------------------------------------------------------------------------------------------------------------------------------------------------------------------------------------------------------------------------------------------------------------------------------------------------------------------------------------------------------------------------------------------------------------------------------------------------------------------------------------------------------------------------------------------------------------------------------------------------------------------------------------------------------------------------------------------------------------------------------------------------------------------------------------------------------------------------------------------------------------------------------------------------------------------------------------------------------------------------------|----------------------------------------------------------------------------------------------------------------------------------------------------------------------------------------------------------------------------------------------------------------------------------------------------------------------------------------------------------------------------------------------------------------------------------------------------------------------------------------------------------------------------------------------------------------------------------------------------------------------------------------------------------------------------------------------------------------------------------------------------------------------------------------------------------------------------------------------------------------------------------------------------------------------------------------------------------------------------------------------------------------------------------------------------------------------------------------------------------------------------------------------------------------------------------------------------------------------------------------------------------------------------------------------------------------------------------------------------------------------------------------------------------------------------------------------------------------------------------------------------------------------------------------------------------------------------------------------------------------------------------------------------------------------------------------------------------------------------------------------------------------------------------------------------------------------------------------------------------------------------------------------------------------------------------------------------------------------------------------------------------------------------------------------------------------------------------------------------------------------------------------------------------------------------------------------------------------------------------------------------------------------------------------------------------------|---------------------------------------------------------------------------------------------------------------------------------------------------------------------------------------------------------------------------------------------------------------------------------------------------------------------------------------------------------------------------------------------------------------------------------------------------------------------------------------------------------------------------------------------------------------------------------------------------------------------------------------------------------------------------------------------------------------------------------------------------------------------------------------------------------------------------------------------------------------------------------------------------------------------------------------------------------------------------------------------------------------------------------------------------------------------------------------------------------------------------------------------------------------------------------------------------------------------------------------------------------------------------------------------------------------------------------------------------------------------------------------------------------------------------------------------------------------------------------------------------------------------------------------------------------------------------------------------------------------------------------------------------------------------------------------------------------------------------------------------------------------------------------------------------------------------------------------------------------------------------------------------------------------------------------------------------------------------------------------------------------------------------------------------------------------------------------------------------------------------------------------------------------------------------------------------------------------------------------------------------------------------------------------------------------------------|

|            |                                                                                                                                                                                                                                                                                                                                                                                                                                                                                                                                                                                                                                                                                                                                                                                                                                                                                                                                                                                                                                                                                                                                                                                                                                                                                                                                                                                                                                                                                                                                                                                                                                                                                                                                                                                                                                                                                                                                                                                                                                                                                                                                                                                                                                                                                   |                                                                                                                                                                                                                                                                                                                                                                                                                                                                                                                                                                                                                                                                                                                                                                                                                                                                                                                                                                                                                                                                                                                                                                                                                                                                                                                                                                                                                                                                                                                                                                                                                                                                                                                                                                                                                                                                                                                                                                                                                                                                                                                                                                                                                                                                                                                                                                                                                                                                             |                                                                                                                                                                                                                                                                                                                                                                                                                                                                                                                                                                                                                                                                                                                                                                                                                                                                                                                                                                                                                                                                                                                                                                                                                                                                                                                                                                                                                                                                                                                                                                                                                                                                                                                                                                                                                                                                                                                                                                                                                                                                                                                                                                                                                                                                                                                                                                                                                                                                                |
|------------|-----------------------------------------------------------------------------------------------------------------------------------------------------------------------------------------------------------------------------------------------------------------------------------------------------------------------------------------------------------------------------------------------------------------------------------------------------------------------------------------------------------------------------------------------------------------------------------------------------------------------------------------------------------------------------------------------------------------------------------------------------------------------------------------------------------------------------------------------------------------------------------------------------------------------------------------------------------------------------------------------------------------------------------------------------------------------------------------------------------------------------------------------------------------------------------------------------------------------------------------------------------------------------------------------------------------------------------------------------------------------------------------------------------------------------------------------------------------------------------------------------------------------------------------------------------------------------------------------------------------------------------------------------------------------------------------------------------------------------------------------------------------------------------------------------------------------------------------------------------------------------------------------------------------------------------------------------------------------------------------------------------------------------------------------------------------------------------------------------------------------------------------------------------------------------------------------------------------------------------------------------------------------------------|-----------------------------------------------------------------------------------------------------------------------------------------------------------------------------------------------------------------------------------------------------------------------------------------------------------------------------------------------------------------------------------------------------------------------------------------------------------------------------------------------------------------------------------------------------------------------------------------------------------------------------------------------------------------------------------------------------------------------------------------------------------------------------------------------------------------------------------------------------------------------------------------------------------------------------------------------------------------------------------------------------------------------------------------------------------------------------------------------------------------------------------------------------------------------------------------------------------------------------------------------------------------------------------------------------------------------------------------------------------------------------------------------------------------------------------------------------------------------------------------------------------------------------------------------------------------------------------------------------------------------------------------------------------------------------------------------------------------------------------------------------------------------------------------------------------------------------------------------------------------------------------------------------------------------------------------------------------------------------------------------------------------------------------------------------------------------------------------------------------------------------------------------------------------------------------------------------------------------------------------------------------------------------------------------------------------------------------------------------------------------------------------------------------------------------------------------------------------------------|--------------------------------------------------------------------------------------------------------------------------------------------------------------------------------------------------------------------------------------------------------------------------------------------------------------------------------------------------------------------------------------------------------------------------------------------------------------------------------------------------------------------------------------------------------------------------------------------------------------------------------------------------------------------------------------------------------------------------------------------------------------------------------------------------------------------------------------------------------------------------------------------------------------------------------------------------------------------------------------------------------------------------------------------------------------------------------------------------------------------------------------------------------------------------------------------------------------------------------------------------------------------------------------------------------------------------------------------------------------------------------------------------------------------------------------------------------------------------------------------------------------------------------------------------------------------------------------------------------------------------------------------------------------------------------------------------------------------------------------------------------------------------------------------------------------------------------------------------------------------------------------------------------------------------------------------------------------------------------------------------------------------------------------------------------------------------------------------------------------------------------------------------------------------------------------------------------------------------------------------------------------------------------------------------------------------------------------------------------------------------------------------------------------------------------------------------------------------------------|
| <p>Q57</p> | <p>If a patient receiving Ipilimumab and Nivolumab for metastatic melanoma develops severe toxicity with hepatitis and colitis that requires stopping the treatment, it can have implications for the patient's prognosis. Here are some considerations:</p> <ol style="list-style-type: none"> <li>1. Treatment Discontinuation: Stopping treatment due to severe toxicity indicates that the patient cannot continue receiving Ipilimumab and Nivolumab. This can impact the effectiveness of the treatment regimen, as discontinuation may limit the ability to maintain or further enhance the treatment response.</li> <li>2. Immune-related Adverse Events (irAEs): Hepatitis and colitis are severe immune-related adverse events (irAEs) associated with Ipilimumab and Nivolumab treatment. These side effects occur due to the immune system's activation, which can lead to inflammation and damage to healthy tissues. Severe irAEs require prompt management and may necessitate the discontinuation of treatment.</li> <li>3. Impact on Long-Term Prognosis: The impact on long-term prognosis will depend on several factors, including the extent of treatment response before stopping therapy, the severity of toxicity, and the availability of alternative treatment options. It's important to discuss these factors with the healthcare team to understand the potential impact on prognosis.</li> <li>4. Individual Factors: The patient's overall health, tumor characteristics, and any pre-existing medical conditions may also influence prognosis. Patients who experience severe toxicity may have a higher risk of developing future immune-related adverse events, which could limit future treatment options and affect overall prognosis.</li> </ol> <p>It is crucial to consult with the healthcare team, including oncologists and specialists managing the toxicities, to evaluate the individual patient's case. They can provide a more accurate assessment of the impact on prognosis based on the patient's specific situation and available treatment options. Regular follow-up visits and ongoing monitoring are essential to manage any potential long-term effects and to explore alternative treatment strategies if necessary.</p> | <p>If a patient receiving Ipilimumab and Nivolumab for metastatic melanoma develops severe toxicity with hepatitis and colitis that requires stopping the treatment, it can have implications for the patient's prognosis. Here are some considerations:</p> <ol style="list-style-type: none"> <li>1. Treatment Discontinuation: Stopping treatment due to severe toxicity indicates that the patient cannot continue receiving Ipilimumab and Nivolumab. This can impact the effectiveness of the treatment regimen, as discontinuation may limit the ability to maintain or further enhance the treatment response.</li> <li>2. Immune-related Adverse Events (irAEs): Hepatitis and colitis are severe immune-related adverse events (irAEs) associated with Ipilimumab and Nivolumab treatment. These side effects occur due to the immune system's activation, which can lead to inflammation and damage to healthy tissues. Severe irAEs require prompt management and may necessitate the discontinuation of treatment.</li> <li>3. Impact on Long-Term Prognosis: The impact on long-term prognosis will depend on several factors, including the extent of treatment response before stopping therapy, the severity of toxicity, and the availability of alternative treatment options. Discontinuing treatment due to severe toxicity may lead to a loss of the treatment's beneficial effects, potentially affecting prognosis. However, it's important to note that individual responses can vary, and some patients may still have favorable long-term outcomes despite treatment discontinuation.</li> <li>4. Individual Factors: The patient's overall health, tumor characteristics, and any pre-existing medical conditions may also influence prognosis. Patients who experience severe toxicity may have a higher risk of developing future immune-related adverse events, which could limit future treatment options and affect overall prognosis.</li> </ol> <p>It is crucial to consult with the healthcare team, including oncologists and specialists managing the toxicities, to evaluate the individual patient's case. They can provide a more accurate assessment of the impact on prognosis based on the patient's specific situation and available treatment options. Regular follow-up visits and ongoing monitoring are essential to manage any potential long-term effects and explore alternative treatment strategies if necessary.</p> | <p>If a patient receiving Ipilimumab and Nivolumab for metastatic melanoma develops severe toxicity with hepatitis and colitis that necessitates stopping treatment, it can have implications for the patient's prognosis. Here are some considerations:</p> <ol style="list-style-type: none"> <li>1. Treatment Discontinuation: Stopping treatment due to severe toxicity indicates that the patient cannot continue receiving Ipilimumab and Nivolumab. This discontinuation can potentially limit the effectiveness of the treatment regimen and its ability to maintain or further enhance the treatment response.</li> <li>2. Immune-related Adverse Events (irAEs): Hepatitis and colitis are severe immune-related adverse events (irAEs) associated with Ipilimumab and Nivolumab treatment. These side effects occur due to the immune system's activation, which can lead to inflammation and damage to healthy tissues. Severe irAEs require prompt management and may necessitate the discontinuation of treatment.</li> <li>3. Impact on Long-Term Prognosis: The impact on long-term prognosis will depend on several factors, including the extent of treatment response before stopping therapy, the severity of toxicity, and the availability of alternative treatment options. Discontinuing treatment due to severe toxicity may result in a loss of the treatment's beneficial effects, potentially affecting prognosis. However, it's important to note that individual responses can vary, and some patients may still have favorable long-term outcomes despite treatment discontinuation.</li> <li>4. Individual Factors: The patient's overall health, tumor characteristics, and any pre-existing medical conditions may also influence prognosis. Patients who experience severe toxicity may have a higher risk of developing future immune-related adverse events, which could limit future treatment options and affect overall prognosis.</li> </ol> <p>It is crucial to consult with the healthcare team, including oncologists and specialists managing the toxicities, to evaluate the individual patient's case. They can provide a more accurate assessment of the impact on prognosis based on the patient's specific situation and available treatment options. Regular follow-up visits and ongoing monitoring are essential to manage any potential long-term effects and explore alternative treatment strategies if necessary.</p> |
|------------|-----------------------------------------------------------------------------------------------------------------------------------------------------------------------------------------------------------------------------------------------------------------------------------------------------------------------------------------------------------------------------------------------------------------------------------------------------------------------------------------------------------------------------------------------------------------------------------------------------------------------------------------------------------------------------------------------------------------------------------------------------------------------------------------------------------------------------------------------------------------------------------------------------------------------------------------------------------------------------------------------------------------------------------------------------------------------------------------------------------------------------------------------------------------------------------------------------------------------------------------------------------------------------------------------------------------------------------------------------------------------------------------------------------------------------------------------------------------------------------------------------------------------------------------------------------------------------------------------------------------------------------------------------------------------------------------------------------------------------------------------------------------------------------------------------------------------------------------------------------------------------------------------------------------------------------------------------------------------------------------------------------------------------------------------------------------------------------------------------------------------------------------------------------------------------------------------------------------------------------------------------------------------------------|-----------------------------------------------------------------------------------------------------------------------------------------------------------------------------------------------------------------------------------------------------------------------------------------------------------------------------------------------------------------------------------------------------------------------------------------------------------------------------------------------------------------------------------------------------------------------------------------------------------------------------------------------------------------------------------------------------------------------------------------------------------------------------------------------------------------------------------------------------------------------------------------------------------------------------------------------------------------------------------------------------------------------------------------------------------------------------------------------------------------------------------------------------------------------------------------------------------------------------------------------------------------------------------------------------------------------------------------------------------------------------------------------------------------------------------------------------------------------------------------------------------------------------------------------------------------------------------------------------------------------------------------------------------------------------------------------------------------------------------------------------------------------------------------------------------------------------------------------------------------------------------------------------------------------------------------------------------------------------------------------------------------------------------------------------------------------------------------------------------------------------------------------------------------------------------------------------------------------------------------------------------------------------------------------------------------------------------------------------------------------------------------------------------------------------------------------------------------------------|--------------------------------------------------------------------------------------------------------------------------------------------------------------------------------------------------------------------------------------------------------------------------------------------------------------------------------------------------------------------------------------------------------------------------------------------------------------------------------------------------------------------------------------------------------------------------------------------------------------------------------------------------------------------------------------------------------------------------------------------------------------------------------------------------------------------------------------------------------------------------------------------------------------------------------------------------------------------------------------------------------------------------------------------------------------------------------------------------------------------------------------------------------------------------------------------------------------------------------------------------------------------------------------------------------------------------------------------------------------------------------------------------------------------------------------------------------------------------------------------------------------------------------------------------------------------------------------------------------------------------------------------------------------------------------------------------------------------------------------------------------------------------------------------------------------------------------------------------------------------------------------------------------------------------------------------------------------------------------------------------------------------------------------------------------------------------------------------------------------------------------------------------------------------------------------------------------------------------------------------------------------------------------------------------------------------------------------------------------------------------------------------------------------------------------------------------------------------------------|

|            |                                                                                                                                                                                                                                                                                                                                                                                                                                                                                                                                                                                                                                                                                                                                                                                                                                                                                                                                                                                                                                                                                                                                                                                                                                                                                                                                                                                                                                                                                                                                                                                                                                                                                                                                                                                                                                                                                                                                                                                                                                                                                                                                                                                                                                                                                                                                                                                                                                                                                                                                                                                                                                                                                                                                                                                                                                |                                                                                                                                                                                                                                                                                                                                                                                                                                                                                                                                                                                                                                                                                                                                                                                                                                                                                                                                                                                                                                                                                                                                                                                                                                                                                                                                                                                                                                                                                                                                                                                                                                                                                                                                                                                                                                                                                                                                                                                                                                                                                                                                                                                                                                                                                                                                                                                                                                                                                                                                                                                                                                                                                                                                                                                                                                                                                                                                     |                                                                                                                                                                                                                                                                                                                                                                                                                                                                                                                                                                                                                                                                                                                                                                                                                                                                                                                                                                                                                                                                                                                                                                                                                                                                                                                                                                                                                                                                                                                                                                                                                                                                                                                                                                                                                                                                                                                                                                                                                                                                                                                                                                                                                                                                                                                                                                                                                                                                                                                                                                                                                                                                                                                                                                                                                                                                                                                                                                                                                                                   |
|------------|--------------------------------------------------------------------------------------------------------------------------------------------------------------------------------------------------------------------------------------------------------------------------------------------------------------------------------------------------------------------------------------------------------------------------------------------------------------------------------------------------------------------------------------------------------------------------------------------------------------------------------------------------------------------------------------------------------------------------------------------------------------------------------------------------------------------------------------------------------------------------------------------------------------------------------------------------------------------------------------------------------------------------------------------------------------------------------------------------------------------------------------------------------------------------------------------------------------------------------------------------------------------------------------------------------------------------------------------------------------------------------------------------------------------------------------------------------------------------------------------------------------------------------------------------------------------------------------------------------------------------------------------------------------------------------------------------------------------------------------------------------------------------------------------------------------------------------------------------------------------------------------------------------------------------------------------------------------------------------------------------------------------------------------------------------------------------------------------------------------------------------------------------------------------------------------------------------------------------------------------------------------------------------------------------------------------------------------------------------------------------------------------------------------------------------------------------------------------------------------------------------------------------------------------------------------------------------------------------------------------------------------------------------------------------------------------------------------------------------------------------------------------------------------------------------------------------------|-------------------------------------------------------------------------------------------------------------------------------------------------------------------------------------------------------------------------------------------------------------------------------------------------------------------------------------------------------------------------------------------------------------------------------------------------------------------------------------------------------------------------------------------------------------------------------------------------------------------------------------------------------------------------------------------------------------------------------------------------------------------------------------------------------------------------------------------------------------------------------------------------------------------------------------------------------------------------------------------------------------------------------------------------------------------------------------------------------------------------------------------------------------------------------------------------------------------------------------------------------------------------------------------------------------------------------------------------------------------------------------------------------------------------------------------------------------------------------------------------------------------------------------------------------------------------------------------------------------------------------------------------------------------------------------------------------------------------------------------------------------------------------------------------------------------------------------------------------------------------------------------------------------------------------------------------------------------------------------------------------------------------------------------------------------------------------------------------------------------------------------------------------------------------------------------------------------------------------------------------------------------------------------------------------------------------------------------------------------------------------------------------------------------------------------------------------------------------------------------------------------------------------------------------------------------------------------------------------------------------------------------------------------------------------------------------------------------------------------------------------------------------------------------------------------------------------------------------------------------------------------------------------------------------------------|---------------------------------------------------------------------------------------------------------------------------------------------------------------------------------------------------------------------------------------------------------------------------------------------------------------------------------------------------------------------------------------------------------------------------------------------------------------------------------------------------------------------------------------------------------------------------------------------------------------------------------------------------------------------------------------------------------------------------------------------------------------------------------------------------------------------------------------------------------------------------------------------------------------------------------------------------------------------------------------------------------------------------------------------------------------------------------------------------------------------------------------------------------------------------------------------------------------------------------------------------------------------------------------------------------------------------------------------------------------------------------------------------------------------------------------------------------------------------------------------------------------------------------------------------------------------------------------------------------------------------------------------------------------------------------------------------------------------------------------------------------------------------------------------------------------------------------------------------------------------------------------------------------------------------------------------------------------------------------------------------------------------------------------------------------------------------------------------------------------------------------------------------------------------------------------------------------------------------------------------------------------------------------------------------------------------------------------------------------------------------------------------------------------------------------------------------------------------------------------------------------------------------------------------------------------------------------------------------------------------------------------------------------------------------------------------------------------------------------------------------------------------------------------------------------------------------------------------------------------------------------------------------------------------------------------------------------------------------------------------------------------------------------------------------|
| <p>Q58</p> | <p>In a patient with metastatic melanoma who experiences significant asthenia (weakness/fatigue), weight loss, and pain but shows clinical improvement after commencing combination immunotherapy with Nivolumab and Ipilimumab, despite the restaging scan reporting progression, the management approach can be complex. Here are some considerations:</p> <ol style="list-style-type: none"> <li>1. Clinical Assessment: It is important to evaluate the patient's overall clinical condition beyond the radiological findings. If the patient's asthenia improves, weight stabilizes or increases, pain is reduced, and overall quality of life improves, despite the radiological progression, it suggests that the immunotherapy may still be providing clinical benefits.</li> <li>2. Confirmatory Imaging: Consider obtaining further imaging studies to confirm the radiological findings of disease progression. There can be instances where initial imaging interpretations may overestimate disease progression, and additional scans may provide a more accurate assessment.</li> <li>3. Biopsy or Molecular Testing: If feasible and clinically appropriate, a biopsy or molecular testing of the progressing lesion can be considered to determine if there are any changes in the tumor biology that may provide insights into the mechanism of resistance and guide treatment decisions.</li> <li>4. Expert Consultation: Seek the input of a multidisciplinary team, including medical oncologists, radiologists, and other specialists experienced in managing melanoma. They can review the patient's specific case, including clinical and radiological findings, and provide expert guidance on the next steps.</li> <li>5. Treatment Modification: Based on the clinical improvement despite radiological progression, it may be reasonable to continue the combination immunotherapy with Nivolumab and Ipilimumab if the patient is tolerating it well and experiencing significant clinical benefits. However, individual patient factors and preferences, as well as alternative treatment options, should be considered and discussed with the healthcare team.</li> <li>6. Clinical Trials and Targeted Therapies: If available, participation in clinical trials or considering targeted therapies based on molecular profiling of the tumor can be potential options for further treatment.</li> </ol> <p>It is important to have open and ongoing communication with the healthcare team to discuss the specific case and consider the most appropriate management approach. Every patient's situation is unique, and decisions should be made in collaboration with the patient, taking into account their individual characteristics, treatment goals, and available treatment options.</p> | <p>In a patient with metastatic melanoma who experiences significant asthenia (weakness/fatigue), weight loss, and pain but shows rapid clinical improvement after commencing combination immunotherapy with Nivolumab and Ipilimumab, despite the first restaging scan reporting progression, the management approach can be challenging. Here are some considerations:</p> <ol style="list-style-type: none"> <li>1. Clinical Assessment: It is important to evaluate the patient's overall clinical condition beyond the radiological findings. If the patient's asthenia improves, weight stabilizes or increases, pain is reduced, and overall quality of life improves, despite the radiological progression, it suggests that the immunotherapy may still be providing clinical benefits.</li> <li>2. Confirmatory Imaging: Consider obtaining additional imaging studies, such as a repeat scan or imaging of specific sites of concern, to confirm the radiological findings and assess disease progression accurately. There can be instances where initial imaging interpretations may overestimate disease progression, and further imaging may provide a more accurate assessment.</li> <li>3. Biopsy or Molecular Testing: If feasible and clinically appropriate, a biopsy or molecular testing of the progressing lesion can be considered to determine if there are any changes in the tumor biology that may provide insights into the mechanism of resistance and guide treatment decisions.</li> <li>4. Expert Consultation: Seek the input of a multidisciplinary team, including medical oncologists, radiologists, and other specialists experienced in managing melanoma. They can review the patient's specific case, including clinical and radiological findings, and provide expert guidance on the next steps.</li> <li>5. Treatment Modification: Based on the clinical improvement despite radiological progression, it may be reasonable to continue the combination immunotherapy with Nivolumab and Ipilimumab if the patient is tolerating it well and experiencing significant clinical benefits. However, individual patient factors and preferences, as well as alternative treatment options, should be considered and discussed with the healthcare team.</li> <li>6. Clinical Trials and Targeted Therapies: If available, participation in clinical trials or considering targeted therapies based on molecular profiling of the tumor can be potential options for further treatment.</li> </ol> <p>It is important to have open and ongoing communication with the healthcare team to discuss the specific case and consider the most appropriate management approach. Every patient's situation is unique, and decisions should be made in collaboration with the patient, taking into account their individual characteristics, treatment goals, and available treatment options.</p> | <p>In a patient with metastatic melanoma who experiences significant asthenia, weight loss, and pain but shows rapid clinical improvement after commencing combination immunotherapy with Nivolumab and Ipilimumab, despite the first restaging scan reporting progression, the management approach can be complex. Here are some considerations:</p> <ol style="list-style-type: none"> <li>1. Clinical Assessment: It is important to evaluate the patient's overall clinical condition beyond the radiological findings. If the patient's asthenia improves, weight stabilizes or increases, pain is reduced, and overall quality of life improves, despite the radiological progression, it suggests that the immunotherapy may still be providing clinical benefits.</li> <li>2. Confirmatory Imaging: Additional imaging studies, such as a repeat scan or imaging of specific sites of concern, can be considered to confirm the radiological findings and assess disease progression accurately. It is important to evaluate the possibility of pseudoprogression, which refers to an initial increase in tumor size due to immune cell infiltration before the tumor starts to shrink.</li> <li>3. Expert Consultation: Seeking the input of a multidisciplinary team, including medical oncologists, radiologists, and other specialists experienced in managing melanoma, is crucial. They can review the patient's specific case, including clinical and radiological findings, and provide expert guidance on the next steps.</li> <li>4. Biopsy or Molecular Testing: If feasible and clinically appropriate, a biopsy or molecular testing of the progressing lesion can be considered to determine if there are any changes in the tumor biology that may provide insights into the mechanism of resistance and guide treatment decisions.</li> <li>5. Treatment Modification: Based on the clinical improvement despite radiological progression, it may be reasonable to continue the combination immunotherapy with Nivolumab and Ipilimumab if the patient is tolerating it well and experiencing significant clinical benefits. However, individual patient factors and preferences, as well as alternative treatment options, should be considered and discussed with the healthcare team.</li> <li>6. Clinical Trials and Targeted Therapies: Participation in clinical trials or considering targeted therapies based on molecular profiling of the tumor can be potential options for further treatment, especially if there is evidence of specific molecular alterations that may guide alternative therapeutic approaches. It is important to have open and ongoing communication with the healthcare team to discuss the specific case and consider the most appropriate management approach. Each patient's situation is unique, and decisions should be made in collaboration with the patient, taking into account their individual characteristics, treatment goals, and available treatment options.</li> </ol> |
|------------|--------------------------------------------------------------------------------------------------------------------------------------------------------------------------------------------------------------------------------------------------------------------------------------------------------------------------------------------------------------------------------------------------------------------------------------------------------------------------------------------------------------------------------------------------------------------------------------------------------------------------------------------------------------------------------------------------------------------------------------------------------------------------------------------------------------------------------------------------------------------------------------------------------------------------------------------------------------------------------------------------------------------------------------------------------------------------------------------------------------------------------------------------------------------------------------------------------------------------------------------------------------------------------------------------------------------------------------------------------------------------------------------------------------------------------------------------------------------------------------------------------------------------------------------------------------------------------------------------------------------------------------------------------------------------------------------------------------------------------------------------------------------------------------------------------------------------------------------------------------------------------------------------------------------------------------------------------------------------------------------------------------------------------------------------------------------------------------------------------------------------------------------------------------------------------------------------------------------------------------------------------------------------------------------------------------------------------------------------------------------------------------------------------------------------------------------------------------------------------------------------------------------------------------------------------------------------------------------------------------------------------------------------------------------------------------------------------------------------------------------------------------------------------------------------------------------------------|-------------------------------------------------------------------------------------------------------------------------------------------------------------------------------------------------------------------------------------------------------------------------------------------------------------------------------------------------------------------------------------------------------------------------------------------------------------------------------------------------------------------------------------------------------------------------------------------------------------------------------------------------------------------------------------------------------------------------------------------------------------------------------------------------------------------------------------------------------------------------------------------------------------------------------------------------------------------------------------------------------------------------------------------------------------------------------------------------------------------------------------------------------------------------------------------------------------------------------------------------------------------------------------------------------------------------------------------------------------------------------------------------------------------------------------------------------------------------------------------------------------------------------------------------------------------------------------------------------------------------------------------------------------------------------------------------------------------------------------------------------------------------------------------------------------------------------------------------------------------------------------------------------------------------------------------------------------------------------------------------------------------------------------------------------------------------------------------------------------------------------------------------------------------------------------------------------------------------------------------------------------------------------------------------------------------------------------------------------------------------------------------------------------------------------------------------------------------------------------------------------------------------------------------------------------------------------------------------------------------------------------------------------------------------------------------------------------------------------------------------------------------------------------------------------------------------------------------------------------------------------------------------------------------------------------|---------------------------------------------------------------------------------------------------------------------------------------------------------------------------------------------------------------------------------------------------------------------------------------------------------------------------------------------------------------------------------------------------------------------------------------------------------------------------------------------------------------------------------------------------------------------------------------------------------------------------------------------------------------------------------------------------------------------------------------------------------------------------------------------------------------------------------------------------------------------------------------------------------------------------------------------------------------------------------------------------------------------------------------------------------------------------------------------------------------------------------------------------------------------------------------------------------------------------------------------------------------------------------------------------------------------------------------------------------------------------------------------------------------------------------------------------------------------------------------------------------------------------------------------------------------------------------------------------------------------------------------------------------------------------------------------------------------------------------------------------------------------------------------------------------------------------------------------------------------------------------------------------------------------------------------------------------------------------------------------------------------------------------------------------------------------------------------------------------------------------------------------------------------------------------------------------------------------------------------------------------------------------------------------------------------------------------------------------------------------------------------------------------------------------------------------------------------------------------------------------------------------------------------------------------------------------------------------------------------------------------------------------------------------------------------------------------------------------------------------------------------------------------------------------------------------------------------------------------------------------------------------------------------------------------------------------------------------------------------------------------------------------------------------------|

|            |                                                                                                                                                                                                                                                                                                                                                                                                                                                                                                                                                                                                                                                                                                                                                                                                                                                                                                                                                                                                                                                                                                                                                                                                                                                                                                                                                                                                                                                                                                                                                                                                                                                                                                                                                                                                                                                                                                                                                                                                                                                                                                                                                                                                                                                                                                                                                                                                                                                                                                                                           |                                                                                                                                                                                                                                                                                                                                                                                                                                                                                                                                                                                                                                                                                                                                                                                                                                                                                                                                                                                                                                                                                                                                                                                                                                                                                                                                                                                                                                                                                                                                                                                                                                                                                                                                                                                                                                                                                                                                                                                                                                                                                                                                                                                                                                                                                                                                                                                                                                                                                                                                                                         |                                                                                                                                                                                                                                                                                                                                                                                                                                                                                                                                                                                                                                                                                                                                                                                                                                                                                                                                                                                                                                                                                                                                                                                                                                                                                                                                                                                                                                                                                                                                                                                                                                                                                                                                                                                                                                                                                                                                                                                                                                                                                                                                                                                                                                                                                                                                                                                                                  |
|------------|-------------------------------------------------------------------------------------------------------------------------------------------------------------------------------------------------------------------------------------------------------------------------------------------------------------------------------------------------------------------------------------------------------------------------------------------------------------------------------------------------------------------------------------------------------------------------------------------------------------------------------------------------------------------------------------------------------------------------------------------------------------------------------------------------------------------------------------------------------------------------------------------------------------------------------------------------------------------------------------------------------------------------------------------------------------------------------------------------------------------------------------------------------------------------------------------------------------------------------------------------------------------------------------------------------------------------------------------------------------------------------------------------------------------------------------------------------------------------------------------------------------------------------------------------------------------------------------------------------------------------------------------------------------------------------------------------------------------------------------------------------------------------------------------------------------------------------------------------------------------------------------------------------------------------------------------------------------------------------------------------------------------------------------------------------------------------------------------------------------------------------------------------------------------------------------------------------------------------------------------------------------------------------------------------------------------------------------------------------------------------------------------------------------------------------------------------------------------------------------------------------------------------------------------|-------------------------------------------------------------------------------------------------------------------------------------------------------------------------------------------------------------------------------------------------------------------------------------------------------------------------------------------------------------------------------------------------------------------------------------------------------------------------------------------------------------------------------------------------------------------------------------------------------------------------------------------------------------------------------------------------------------------------------------------------------------------------------------------------------------------------------------------------------------------------------------------------------------------------------------------------------------------------------------------------------------------------------------------------------------------------------------------------------------------------------------------------------------------------------------------------------------------------------------------------------------------------------------------------------------------------------------------------------------------------------------------------------------------------------------------------------------------------------------------------------------------------------------------------------------------------------------------------------------------------------------------------------------------------------------------------------------------------------------------------------------------------------------------------------------------------------------------------------------------------------------------------------------------------------------------------------------------------------------------------------------------------------------------------------------------------------------------------------------------------------------------------------------------------------------------------------------------------------------------------------------------------------------------------------------------------------------------------------------------------------------------------------------------------------------------------------------------------------------------------------------------------------------------------------------------------|------------------------------------------------------------------------------------------------------------------------------------------------------------------------------------------------------------------------------------------------------------------------------------------------------------------------------------------------------------------------------------------------------------------------------------------------------------------------------------------------------------------------------------------------------------------------------------------------------------------------------------------------------------------------------------------------------------------------------------------------------------------------------------------------------------------------------------------------------------------------------------------------------------------------------------------------------------------------------------------------------------------------------------------------------------------------------------------------------------------------------------------------------------------------------------------------------------------------------------------------------------------------------------------------------------------------------------------------------------------------------------------------------------------------------------------------------------------------------------------------------------------------------------------------------------------------------------------------------------------------------------------------------------------------------------------------------------------------------------------------------------------------------------------------------------------------------------------------------------------------------------------------------------------------------------------------------------------------------------------------------------------------------------------------------------------------------------------------------------------------------------------------------------------------------------------------------------------------------------------------------------------------------------------------------------------------------------------------------------------------------------------------------------------|
| <p>Q59</p> | <p>Germline mutations are inherited genetic mutations that can impact an individual's risk of developing cancer. While germline mutations can influence various aspects of cancer development and treatment, there isn't a specific germline mutation universally associated with the best prognosis when treated with immunotherapy. However, certain germline mutations have been studied in the context of immunotherapy and have shown promising associations with treatment response. Here are a few examples:</p> <ol style="list-style-type: none"> <li>1. Microsatellite Instability (MSI) and Mismatch Repair (MMR) Deficiency: Germline mutations in genes involved in DNA mismatch repair, such as MLH1, MSH2, MSH6, and PMS2, can lead to MSI and MMR deficiency. These molecular features are associated with increased responsiveness to immune checkpoint inhibitors, such as pembrolizumab or nivolumab, across various cancer types, including colorectal cancer, endometrial cancer, and others.</li> <li>2. BRCA1/BRCA2 Mutations: Germline mutations in the BRCA1 and BRCA2 genes are primarily associated with hereditary breast and ovarian cancers. Some studies suggest that BRCA1/2 mutations may enhance the immune response to cancer cells and increase sensitivity to immunotherapy, particularly in breast and ovarian cancers. However, more research is needed to fully understand the impact of BRCA1/2 mutations on immunotherapy response and prognosis.</li> <li>3. POLE and POLD1 Mutations: Germline mutations in the POLE (polymerase epsilon) and POLD1 (polymerase delta) genes have been associated with increased tumor mutational burden (TMB) and hypermutation in several cancer types. High TMB has been correlated with improved responses to immune checkpoint inhibitors, suggesting a potentially favorable prognosis in patients with POLE or POLD1 mutations.</li> </ol> <p>It's important to note that the impact of germline mutations on immunotherapy response and prognosis can vary depending on the specific mutation, tumor type, stage of disease, and other individual factors. Additionally, germline mutations are just one aspect of a complex interplay of genetic and environmental factors that influence cancer development and treatment outcomes. It is essential to consult with a healthcare professional or genetic counselor who can provide personalized guidance based on the specific germline mutation, cancer type, and treatment options available.</p> | <p>While germline mutations can influence cancer development and treatment outcomes, there isn't a specific germline mutation universally associated with the best prognosis when treated with immunotherapy. The impact of germline mutations on immunotherapy response can vary depending on several factors, including the specific mutation, tumor type, stage of disease, and individual patient characteristics. However, here are some germline mutations that have been studied in the context of immunotherapy and have shown potential associations with treatment response:</p> <ol style="list-style-type: none"> <li>1. Microsatellite Instability (MSI) and Mismatch Repair (MMR) Deficiency: Germline mutations in genes involved in DNA mismatch repair, such as MLH1, MSH2, MSH6, and PMS2, can lead to MSI and MMR deficiency. These molecular features are associated with increased responsiveness to immune checkpoint inhibitors, such as pembrolizumab or nivolumab, across various cancer types, including colorectal cancer, endometrial cancer, and others.</li> <li>2. BRCA1/BRCA2 Mutations: Germline mutations in the BRCA1 and BRCA2 genes are primarily associated with hereditary breast and ovarian cancers. Some studies suggest that BRCA1/2 mutations may enhance the immune response to cancer cells and increase sensitivity to immunotherapy, particularly in breast and ovarian cancers. However, more research is needed to fully understand the impact of BRCA1/2 mutations on immunotherapy response and prognosis.</li> <li>3. POLE and POLD1 Mutations: Germline mutations in the POLE (polymerase epsilon) and POLD1 (polymerase delta) genes have been associated with increased tumor mutational burden (TMB) and hypermutation in several cancer types. High TMB has been correlated with improved responses to immune checkpoint inhibitors, suggesting a potentially favorable prognosis in patients with POLE or POLD1 mutations.</li> </ol> <p>It's important to note that the impact of germline mutations on immunotherapy response and prognosis can vary, and not all patients with these mutations will necessarily have a better prognosis. Additionally, other factors such as tumor characteristics, immune microenvironment, and individual patient factors also play a role in treatment outcomes. Consultation with a healthcare professional or genetic counselor is recommended to assess the specific germline mutation, cancer type, and available treatment options for personalized guidance.</p> | <p>The association between germline mutations and prognosis in cancer patients treated with immunotherapy is a topic of ongoing research, and the specific germline mutations associated with the best prognosis may vary depending on the cancer type and individual patient characteristics. However, some germline mutations have shown promising associations with treatment response and improved outcomes in certain contexts. Here are a few examples:</p> <ol style="list-style-type: none"> <li>1. Microsatellite Instability (MSI) and Mismatch Repair (MMR) Deficiency: Germline mutations in genes involved in DNA mismatch repair, such as MLH1, MSH2, MSH6, and PMS2, can lead to MSI and MMR deficiency. Tumors with MSI and MMR deficiency have shown higher response rates to immune checkpoint inhibitors, such as pembrolizumab or nivolumab, in various cancer types, including colorectal cancer and endometrial cancer.</li> <li>2. POLE and POLD1 Mutations: Germline mutations in the POLE (polymerase epsilon) and POLD1 (polymerase delta) genes have been associated with increased tumor mutational burden (TMB) and hypermutation in several cancer types. High TMB has been correlated with improved responses to immune checkpoint inhibitors, suggesting a potentially favorable prognosis in patients with POLE or POLD1 mutations.</li> <li>3. Homologous Recombination (HR) Gene Mutations: Germline mutations in genes involved in the homologous recombination DNA repair pathway, such as BRCA1 and BRCA2, have shown associations with increased sensitivity to certain immunotherapies, particularly in breast and ovarian cancers. Patients with BRCA1/2 mutations may have better outcomes with immune checkpoint inhibitors or PARP inhibitors.</li> </ol> <p>It's important to note that the impact of germline mutations on prognosis and response to immunotherapy can vary among individuals and may depend on multiple factors. The field of germline mutations and immunotherapy is still evolving, and ongoing research aims to further elucidate the relationship between specific germline mutations and treatment outcomes. Genetic counseling and consultation with healthcare professionals familiar with the patient's specific case are essential to determine the relevance of germline mutations in individual treatment decisions and prognosis.</p> |
|------------|-------------------------------------------------------------------------------------------------------------------------------------------------------------------------------------------------------------------------------------------------------------------------------------------------------------------------------------------------------------------------------------------------------------------------------------------------------------------------------------------------------------------------------------------------------------------------------------------------------------------------------------------------------------------------------------------------------------------------------------------------------------------------------------------------------------------------------------------------------------------------------------------------------------------------------------------------------------------------------------------------------------------------------------------------------------------------------------------------------------------------------------------------------------------------------------------------------------------------------------------------------------------------------------------------------------------------------------------------------------------------------------------------------------------------------------------------------------------------------------------------------------------------------------------------------------------------------------------------------------------------------------------------------------------------------------------------------------------------------------------------------------------------------------------------------------------------------------------------------------------------------------------------------------------------------------------------------------------------------------------------------------------------------------------------------------------------------------------------------------------------------------------------------------------------------------------------------------------------------------------------------------------------------------------------------------------------------------------------------------------------------------------------------------------------------------------------------------------------------------------------------------------------------------------|-------------------------------------------------------------------------------------------------------------------------------------------------------------------------------------------------------------------------------------------------------------------------------------------------------------------------------------------------------------------------------------------------------------------------------------------------------------------------------------------------------------------------------------------------------------------------------------------------------------------------------------------------------------------------------------------------------------------------------------------------------------------------------------------------------------------------------------------------------------------------------------------------------------------------------------------------------------------------------------------------------------------------------------------------------------------------------------------------------------------------------------------------------------------------------------------------------------------------------------------------------------------------------------------------------------------------------------------------------------------------------------------------------------------------------------------------------------------------------------------------------------------------------------------------------------------------------------------------------------------------------------------------------------------------------------------------------------------------------------------------------------------------------------------------------------------------------------------------------------------------------------------------------------------------------------------------------------------------------------------------------------------------------------------------------------------------------------------------------------------------------------------------------------------------------------------------------------------------------------------------------------------------------------------------------------------------------------------------------------------------------------------------------------------------------------------------------------------------------------------------------------------------------------------------------------------------|------------------------------------------------------------------------------------------------------------------------------------------------------------------------------------------------------------------------------------------------------------------------------------------------------------------------------------------------------------------------------------------------------------------------------------------------------------------------------------------------------------------------------------------------------------------------------------------------------------------------------------------------------------------------------------------------------------------------------------------------------------------------------------------------------------------------------------------------------------------------------------------------------------------------------------------------------------------------------------------------------------------------------------------------------------------------------------------------------------------------------------------------------------------------------------------------------------------------------------------------------------------------------------------------------------------------------------------------------------------------------------------------------------------------------------------------------------------------------------------------------------------------------------------------------------------------------------------------------------------------------------------------------------------------------------------------------------------------------------------------------------------------------------------------------------------------------------------------------------------------------------------------------------------------------------------------------------------------------------------------------------------------------------------------------------------------------------------------------------------------------------------------------------------------------------------------------------------------------------------------------------------------------------------------------------------------------------------------------------------------------------------------------------------|

|            |                                                                                                                                                                                                                                                                                                                                                                                                                                                                                                                                                                                                                                                                                                                                                                                                                                                                                                                                                                                                                                                                                                                                                                                                                                                                                                                                                                                                                                                                                                                                                                                                                                                                                                                                                                                                                                                                                                                                                                                                                                                                                                                                                                                                                                                                                                                                                                                                                                                                                                                                                                                                   |                                                                                                                                                                                                                                                                                                                                                                                                                                                                                                                                                                                                                                                                                                                                                                                                                                                                                                                                                                                                                                                                                                                                                                                                                                                                                                                                                                                                                                                                                                                                                                                                                                                                                                                                                                                                                                                                                                                                                                                                                                                                                                                                                                                                                                                                                                                                                                                                                                                                                                                                                                                                             |                                                                                                                                                                                                                                                                                                                                                                                                                                                                                                                                                                                                                                                                                                                                                                                                                                                                                                                                                                                                                                                                                                                                                                                                                                                                                                                                                                                                                                                                                                                                                                                                                                                                                                                                                                                                                                                                                                                                                                                                                                                                                                                                                                                                                                                                                                                                                                                                                                                                                                                                                                                       |
|------------|---------------------------------------------------------------------------------------------------------------------------------------------------------------------------------------------------------------------------------------------------------------------------------------------------------------------------------------------------------------------------------------------------------------------------------------------------------------------------------------------------------------------------------------------------------------------------------------------------------------------------------------------------------------------------------------------------------------------------------------------------------------------------------------------------------------------------------------------------------------------------------------------------------------------------------------------------------------------------------------------------------------------------------------------------------------------------------------------------------------------------------------------------------------------------------------------------------------------------------------------------------------------------------------------------------------------------------------------------------------------------------------------------------------------------------------------------------------------------------------------------------------------------------------------------------------------------------------------------------------------------------------------------------------------------------------------------------------------------------------------------------------------------------------------------------------------------------------------------------------------------------------------------------------------------------------------------------------------------------------------------------------------------------------------------------------------------------------------------------------------------------------------------------------------------------------------------------------------------------------------------------------------------------------------------------------------------------------------------------------------------------------------------------------------------------------------------------------------------------------------------------------------------------------------------------------------------------------------------|-------------------------------------------------------------------------------------------------------------------------------------------------------------------------------------------------------------------------------------------------------------------------------------------------------------------------------------------------------------------------------------------------------------------------------------------------------------------------------------------------------------------------------------------------------------------------------------------------------------------------------------------------------------------------------------------------------------------------------------------------------------------------------------------------------------------------------------------------------------------------------------------------------------------------------------------------------------------------------------------------------------------------------------------------------------------------------------------------------------------------------------------------------------------------------------------------------------------------------------------------------------------------------------------------------------------------------------------------------------------------------------------------------------------------------------------------------------------------------------------------------------------------------------------------------------------------------------------------------------------------------------------------------------------------------------------------------------------------------------------------------------------------------------------------------------------------------------------------------------------------------------------------------------------------------------------------------------------------------------------------------------------------------------------------------------------------------------------------------------------------------------------------------------------------------------------------------------------------------------------------------------------------------------------------------------------------------------------------------------------------------------------------------------------------------------------------------------------------------------------------------------------------------------------------------------------------------------------------------------|---------------------------------------------------------------------------------------------------------------------------------------------------------------------------------------------------------------------------------------------------------------------------------------------------------------------------------------------------------------------------------------------------------------------------------------------------------------------------------------------------------------------------------------------------------------------------------------------------------------------------------------------------------------------------------------------------------------------------------------------------------------------------------------------------------------------------------------------------------------------------------------------------------------------------------------------------------------------------------------------------------------------------------------------------------------------------------------------------------------------------------------------------------------------------------------------------------------------------------------------------------------------------------------------------------------------------------------------------------------------------------------------------------------------------------------------------------------------------------------------------------------------------------------------------------------------------------------------------------------------------------------------------------------------------------------------------------------------------------------------------------------------------------------------------------------------------------------------------------------------------------------------------------------------------------------------------------------------------------------------------------------------------------------------------------------------------------------------------------------------------------------------------------------------------------------------------------------------------------------------------------------------------------------------------------------------------------------------------------------------------------------------------------------------------------------------------------------------------------------------------------------------------------------------------------------------------------------|
| <p>Q60</p> | <p>Mismatch repair deficiency (MMRd) is a significant molecular characteristic of endometrial cancer that has implications for prognosis and management. Here are the effects of MMRd in the prognosis and management of endometrial cancer:</p> <ol style="list-style-type: none"> <li>1. Prognosis: MMRd is associated with a more favorable prognosis in endometrial cancer. Tumors with MMRd have been found to exhibit better overall survival and disease-specific survival compared to tumors without MMRd. This improved prognosis may be due to the higher immunogenicity of MMRd tumors, leading to increased response to immune checkpoint inhibitors.</li> <li>2. Treatment Response: MMRd tumors have shown high sensitivity to immune checkpoint inhibitors, particularly programmed cell death protein 1 (PD-1) inhibitors like pembrolizumab. These agents work by enhancing the immune system's ability to recognize and target cancer cells. Patients with MMRd endometrial cancer who receive immune checkpoint inhibitors have demonstrated significant response rates, even in cases of advanced or recurrent disease.</li> <li>3. Screening and Testing: Given the clinical implications of MMRd, it is recommended to screen all endometrial cancer patients for MMRd status. This can be done through immunohistochemistry (IHC) testing or genetic testing for specific MMR genes, such as MLH1, MSH2, MSH6, and PMS2. Identifying MMRd in endometrial cancer patients helps guide treatment decisions and predict potential response to immune checkpoint inhibitors.</li> <li>4. Personalized Management: MMRd status is considered in the personalized management of endometrial cancer. Patients with MMRd tumors may be candidates for immune checkpoint inhibitor therapy, either as monotherapy or in combination with other treatments. Additionally, the identification of MMRd may influence decisions regarding surgery, adjuvant therapy, and surveillance strategies for endometrial cancer patients.</li> </ol> <p>It's important to note that while MMRd is generally associated with a favorable prognosis and increased sensitivity to immune checkpoint inhibitors, individual patient characteristics and tumor-specific factors can influence treatment outcomes. Therefore, it is crucial for patients with endometrial cancer to receive a comprehensive evaluation by a multidisciplinary team, including gynecologic oncologists and genetic counselors, to determine the most appropriate management approach based on their specific case.</p> | <p>Mismatch repair deficiency (MMRd) is a significant molecular characteristic of endometrial cancer that has implications for both prognosis and management. Here are the effects of MMRd in the prognosis and management of endometrial cancer:</p> <ol style="list-style-type: none"> <li>1. Prognosis: MMRd is associated with a more favorable prognosis in endometrial cancer. Patients with MMRd endometrial cancer tend to have better overall survival and disease-specific survival compared to patients with intact mismatch repair. This improved prognosis may be attributed to the higher immunogenicity of MMRd tumors, leading to increased immune response against cancer cells.</li> <li>2. Treatment Response: MMRd endometrial tumors are highly responsive to immune checkpoint inhibitors, specifically programmed cell death protein 1 (PD-1) inhibitors such as pembrolizumab. These immunotherapeutic agents enhance the immune system's ability to recognize and target cancer cells. Patients with MMRd endometrial cancer have demonstrated significant response rates to immune checkpoint inhibitors, even in cases of advanced or recurrent disease.</li> <li>3. Screening and Testing: It is recommended to screen all endometrial cancer patients for MMRd status. This can be done through immunohistochemistry (IHC) testing or genetic testing for specific mismatch repair genes, such as MLH1, MSH2, MSH6, and PMS2. Identifying MMRd in endometrial cancer patients helps guide treatment decisions and can predict response to immune checkpoint inhibitors.</li> <li>4. Personalized Management: MMRd status is considered in the personalized management of endometrial cancer. Patients with MMRd tumors may be candidates for immune checkpoint inhibitor therapy, either as monotherapy or in combination with other treatments. Additionally, the identification of MMRd may influence decisions regarding surgery, adjuvant therapy, and surveillance strategies for endometrial cancer patients.</li> </ol> <p>It's important to note that while MMRd is generally associated with a favorable prognosis and increased sensitivity to immune checkpoint inhibitors, individual patient characteristics, tumor stage, and other factors can influence treatment outcomes. Therefore, it is crucial for patients with endometrial cancer to receive a comprehensive evaluation by a multidisciplinary team, including gynecologic oncologists and genetic counselors, to determine the most appropriate management approach based on their specific case.</p> | <p>Mismatch repair deficiency (MMRd) is a significant molecular characteristic in endometrial cancer that has important implications for both prognosis and management. Here are the effects of MMRd in the prognosis and management of endometrial cancer:</p> <ol style="list-style-type: none"> <li>1. Prognosis: MMRd is associated with a more favorable prognosis in endometrial cancer. Patients with MMRd endometrial cancer tend to have better overall survival and disease-specific survival compared to patients with intact mismatch repair. The favorable prognosis is believed to be related to the higher immune response against cancer cells in MMRd tumors.</li> <li>2. Treatment Response: MMRd endometrial tumors are highly responsive to immune checkpoint inhibitors, particularly programmed cell death protein 1 (PD-1) inhibitors such as pembrolizumab. Immune checkpoint inhibitors enhance the immune system's ability to recognize and attack cancer cells. Patients with MMRd endometrial cancer have demonstrated significant response rates to immune checkpoint inhibitors, even in cases of advanced or recurrent disease.</li> <li>3. Screening and Testing: It is recommended to screen all endometrial cancer patients for MMRd status. This can be done through immunohistochemistry (IHC) testing or genetic testing for specific mismatch repair genes, including MLH1, MSH2, MSH6, and PMS2. Identifying MMRd in endometrial cancer patients helps guide treatment decisions and predict potential response to immune checkpoint inhibitors.</li> <li>4. Personalized Management: MMRd status is considered in the personalized management of endometrial cancer. Patients with MMRd tumors may be candidates for immune checkpoint inhibitor therapy, either as monotherapy or in combination with other treatments. The identification of MMRd may also influence decisions regarding surgery, adjuvant therapy, and surveillance strategies for endometrial cancer patients.</li> </ol> <p>It's important to note that while MMRd is generally associated with a more favorable prognosis and increased sensitivity to immune checkpoint inhibitors, individual patient characteristics and tumor-specific factors can influence treatment outcomes. Therefore, it is crucial for patients with endometrial cancer to receive a comprehensive evaluation by a multidisciplinary team, including gynecologic oncologists and genetic counselors, to determine the most appropriate management approach based on their specific case.</p> |
|------------|---------------------------------------------------------------------------------------------------------------------------------------------------------------------------------------------------------------------------------------------------------------------------------------------------------------------------------------------------------------------------------------------------------------------------------------------------------------------------------------------------------------------------------------------------------------------------------------------------------------------------------------------------------------------------------------------------------------------------------------------------------------------------------------------------------------------------------------------------------------------------------------------------------------------------------------------------------------------------------------------------------------------------------------------------------------------------------------------------------------------------------------------------------------------------------------------------------------------------------------------------------------------------------------------------------------------------------------------------------------------------------------------------------------------------------------------------------------------------------------------------------------------------------------------------------------------------------------------------------------------------------------------------------------------------------------------------------------------------------------------------------------------------------------------------------------------------------------------------------------------------------------------------------------------------------------------------------------------------------------------------------------------------------------------------------------------------------------------------------------------------------------------------------------------------------------------------------------------------------------------------------------------------------------------------------------------------------------------------------------------------------------------------------------------------------------------------------------------------------------------------------------------------------------------------------------------------------------------------|-------------------------------------------------------------------------------------------------------------------------------------------------------------------------------------------------------------------------------------------------------------------------------------------------------------------------------------------------------------------------------------------------------------------------------------------------------------------------------------------------------------------------------------------------------------------------------------------------------------------------------------------------------------------------------------------------------------------------------------------------------------------------------------------------------------------------------------------------------------------------------------------------------------------------------------------------------------------------------------------------------------------------------------------------------------------------------------------------------------------------------------------------------------------------------------------------------------------------------------------------------------------------------------------------------------------------------------------------------------------------------------------------------------------------------------------------------------------------------------------------------------------------------------------------------------------------------------------------------------------------------------------------------------------------------------------------------------------------------------------------------------------------------------------------------------------------------------------------------------------------------------------------------------------------------------------------------------------------------------------------------------------------------------------------------------------------------------------------------------------------------------------------------------------------------------------------------------------------------------------------------------------------------------------------------------------------------------------------------------------------------------------------------------------------------------------------------------------------------------------------------------------------------------------------------------------------------------------------------------|---------------------------------------------------------------------------------------------------------------------------------------------------------------------------------------------------------------------------------------------------------------------------------------------------------------------------------------------------------------------------------------------------------------------------------------------------------------------------------------------------------------------------------------------------------------------------------------------------------------------------------------------------------------------------------------------------------------------------------------------------------------------------------------------------------------------------------------------------------------------------------------------------------------------------------------------------------------------------------------------------------------------------------------------------------------------------------------------------------------------------------------------------------------------------------------------------------------------------------------------------------------------------------------------------------------------------------------------------------------------------------------------------------------------------------------------------------------------------------------------------------------------------------------------------------------------------------------------------------------------------------------------------------------------------------------------------------------------------------------------------------------------------------------------------------------------------------------------------------------------------------------------------------------------------------------------------------------------------------------------------------------------------------------------------------------------------------------------------------------------------------------------------------------------------------------------------------------------------------------------------------------------------------------------------------------------------------------------------------------------------------------------------------------------------------------------------------------------------------------------------------------------------------------------------------------------------------------|

ChatGPT-4 - MECHANISMS

|           |                                                                                                                                                                                                                                                                                                                                                                                                                                                                                                                                                                                                                                                                                                                                                                                                                                                                                                                                                                                                                                                                                                                                                                                                                                                                                                                                                                                                                                                                                                                                                                                                                                                                                                                                                                                                                                                                                                                                |                                                                                                                                                                                                                                                                                                                                                                                                                                                                                                                                                                                                                                                                                                                                                                                                                                                                                                                                                                                                                                                                                                                                                                                                                                                                                                                                                                                                                                                                                                                                                                                                                                                                                                                                                                                                                                                                                                                                                            |                                                                                                                                                                                                                                                                                                                                                                                                                                                                                                                                                                                                                                                                                                                                                                                                                                                                                                                                                                                                                                                                                                                                                                                                                                                                                                                                                                                                                                                                                                                                                                                                                                                                                                                                                                                                                                                                                                                                                                                                                                                                                                                                                                                                                                    |
|-----------|--------------------------------------------------------------------------------------------------------------------------------------------------------------------------------------------------------------------------------------------------------------------------------------------------------------------------------------------------------------------------------------------------------------------------------------------------------------------------------------------------------------------------------------------------------------------------------------------------------------------------------------------------------------------------------------------------------------------------------------------------------------------------------------------------------------------------------------------------------------------------------------------------------------------------------------------------------------------------------------------------------------------------------------------------------------------------------------------------------------------------------------------------------------------------------------------------------------------------------------------------------------------------------------------------------------------------------------------------------------------------------------------------------------------------------------------------------------------------------------------------------------------------------------------------------------------------------------------------------------------------------------------------------------------------------------------------------------------------------------------------------------------------------------------------------------------------------------------------------------------------------------------------------------------------------|------------------------------------------------------------------------------------------------------------------------------------------------------------------------------------------------------------------------------------------------------------------------------------------------------------------------------------------------------------------------------------------------------------------------------------------------------------------------------------------------------------------------------------------------------------------------------------------------------------------------------------------------------------------------------------------------------------------------------------------------------------------------------------------------------------------------------------------------------------------------------------------------------------------------------------------------------------------------------------------------------------------------------------------------------------------------------------------------------------------------------------------------------------------------------------------------------------------------------------------------------------------------------------------------------------------------------------------------------------------------------------------------------------------------------------------------------------------------------------------------------------------------------------------------------------------------------------------------------------------------------------------------------------------------------------------------------------------------------------------------------------------------------------------------------------------------------------------------------------------------------------------------------------------------------------------------------------|------------------------------------------------------------------------------------------------------------------------------------------------------------------------------------------------------------------------------------------------------------------------------------------------------------------------------------------------------------------------------------------------------------------------------------------------------------------------------------------------------------------------------------------------------------------------------------------------------------------------------------------------------------------------------------------------------------------------------------------------------------------------------------------------------------------------------------------------------------------------------------------------------------------------------------------------------------------------------------------------------------------------------------------------------------------------------------------------------------------------------------------------------------------------------------------------------------------------------------------------------------------------------------------------------------------------------------------------------------------------------------------------------------------------------------------------------------------------------------------------------------------------------------------------------------------------------------------------------------------------------------------------------------------------------------------------------------------------------------------------------------------------------------------------------------------------------------------------------------------------------------------------------------------------------------------------------------------------------------------------------------------------------------------------------------------------------------------------------------------------------------------------------------------------------------------------------------------------------------|
| <p>Q1</p> | <p>No, immunotherapy drugs do not directly kill cancer cells like chemotherapy or radiation therapy. Instead, immunotherapy works by stimulating the immune system to recognize and attack cancer cells.</p> <p>There are several types of immunotherapy, including:</p> <ol style="list-style-type: none"> <li><b>Monoclonal antibodies</b> - These are man-made versions of immune system proteins. Some monoclonal antibodies can mark cancer cells so they're easier for the immune system to find and destroy.</li> <li><b>Immune checkpoint inhibitors</b> - These drugs help the immune system recognize and attack cancer cells. They basically "take the brakes off" the immune response, allowing it to be more effective against cancer.</li> <li><b>Cancer vaccines</b> - Vaccines can also be used to treat cancer. These vaccines boost the immune system's response to cancer cells.</li> <li><b>CAR T-cell therapy</b> - In this treatment, some of the patient's own immune cells are removed, genetically engineered to fight cancer cells, and then reintroduced into the patient's body.</li> <li><b>Oncolytic virus therapy</b> - This involves using viruses that have been modified in a lab to infect and kill cancer cells.</li> </ol> <p>These treatments have been used to successfully treat a variety of cancers, including lung cancer, melanoma, lymphoma, and others. They often have different side effects compared to traditional chemotherapy, since they target the immune system rather than all rapidly dividing cells.</p> <p>Remember, the effectiveness of immunotherapy can depend on a number of factors, including the type of cancer, the specific characteristics of the cancer cells, and the patient's overall health. As of my knowledge cutoff in 2021, researchers are actively working to develop new immunotherapies and improve the effectiveness of existing ones.</p> | <p>Immunotherapy drugs don't directly kill cancer cells in the same way that chemotherapy or radiation therapy do. Instead, they work by boosting the body's immune system to help it recognize, target, and eliminate the cancer cells.</p> <p>Here's how a few types of immunotherapy drugs work:</p> <ol style="list-style-type: none"> <li><b>Immune checkpoint inhibitors</b>: These drugs block proteins that prevent immune cells from attacking cancer cells. When these "checkpoints" are blocked, immune cells can recognize and attack cancer cells more effectively.</li> <li><b>CAR T-cell therapy</b>: This involves modifying a patient's T cells (a type of white blood cell) in a lab to produce special receptors (chimeric antigen receptors, or CARs) on their surface. These engineered T cells are then infused back into the patient's body where they can seek out and destroy cancer cells.</li> <li><b>Monoclonal antibodies</b>: These are lab-made molecules designed to attach to specific targets on cancer cells. Some can mark cancer cells so they're more visible to the immune system, others can block signals that allow cancer cells to grow and divide, or deliver toxins to cancer cells.</li> <li><b>Cancer vaccines</b>: Some vaccines can help the immune system fight cancer by stimulating an immune response against certain diseases that can cause cancer or against cancer cells directly.</li> </ol> <p>While these methods do not kill cancer cells directly like traditional chemotherapy or radiation therapy, they aid the immune system in its job of defending the body against harmful cells, including cancer cells.</p> <p>It's important to note that the effectiveness of immunotherapy varies for different types of cancer and different individuals, and research is ongoing to develop new treatments and understand why immunotherapy works well for some people and not for others.</p> | <p>Immunotherapy drugs themselves do not directly kill cancer cells. Instead, they work by enhancing or enabling the immune system to recognize and fight cancer cells more effectively. In other words, immunotherapy helps your body's own defense mechanisms to better target and eliminate cancer.</p> <p>Here are some examples of immunotherapy treatments and how they work:</p> <ol style="list-style-type: none"> <li><b>Immune Checkpoint Inhibitors</b>: These drugs work by blocking immune checkpoints, which are regulators of the immune system that cancer cells often misuse to evade an immune response. By blocking these checkpoints, the immune system can better recognize and attack cancer cells.</li> <li><b>CAR-T Therapy</b>: CAR-T therapy involves genetically modifying a patient's T cells (a type of immune cell) to express a receptor that recognizes a specific protein on cancer cells. The engineered T cells are then re-infused into the patient, where they can target and destroy the cancer cells.</li> <li><b>Monoclonal Antibodies</b>: These are lab-made versions of immune system proteins. These antibodies can be designed to bind to specific targets on the surface of cancer cells, marking them for destruction by the immune system. Some are even designed to carry toxins or radioactive material directly to cancer cells, thereby killing them.</li> <li><b>Cancer Vaccines</b>: These stimulate the immune system to respond more effectively to cancer cells. Some vaccines are designed to prevent cancer from occurring in the first place, while others are used to treat existing cancers.</li> <li><b>Oncolytic Virus Therapy</b>: This involves using a virus that has been modified in a lab to infect and kill cancer cells. The death of these cells can further stimulate an immune response.</li> </ol> <p>While each of these therapies utilizes the immune system to combat cancer, they do not kill cancer cells directly. Instead, they rely on the body's own immune system to carry out that task. This is a fundamentally different approach compared to treatments like chemotherapy or radiation, which directly target and kill cancer cells.</p> |
|-----------|--------------------------------------------------------------------------------------------------------------------------------------------------------------------------------------------------------------------------------------------------------------------------------------------------------------------------------------------------------------------------------------------------------------------------------------------------------------------------------------------------------------------------------------------------------------------------------------------------------------------------------------------------------------------------------------------------------------------------------------------------------------------------------------------------------------------------------------------------------------------------------------------------------------------------------------------------------------------------------------------------------------------------------------------------------------------------------------------------------------------------------------------------------------------------------------------------------------------------------------------------------------------------------------------------------------------------------------------------------------------------------------------------------------------------------------------------------------------------------------------------------------------------------------------------------------------------------------------------------------------------------------------------------------------------------------------------------------------------------------------------------------------------------------------------------------------------------------------------------------------------------------------------------------------------------|------------------------------------------------------------------------------------------------------------------------------------------------------------------------------------------------------------------------------------------------------------------------------------------------------------------------------------------------------------------------------------------------------------------------------------------------------------------------------------------------------------------------------------------------------------------------------------------------------------------------------------------------------------------------------------------------------------------------------------------------------------------------------------------------------------------------------------------------------------------------------------------------------------------------------------------------------------------------------------------------------------------------------------------------------------------------------------------------------------------------------------------------------------------------------------------------------------------------------------------------------------------------------------------------------------------------------------------------------------------------------------------------------------------------------------------------------------------------------------------------------------------------------------------------------------------------------------------------------------------------------------------------------------------------------------------------------------------------------------------------------------------------------------------------------------------------------------------------------------------------------------------------------------------------------------------------------------|------------------------------------------------------------------------------------------------------------------------------------------------------------------------------------------------------------------------------------------------------------------------------------------------------------------------------------------------------------------------------------------------------------------------------------------------------------------------------------------------------------------------------------------------------------------------------------------------------------------------------------------------------------------------------------------------------------------------------------------------------------------------------------------------------------------------------------------------------------------------------------------------------------------------------------------------------------------------------------------------------------------------------------------------------------------------------------------------------------------------------------------------------------------------------------------------------------------------------------------------------------------------------------------------------------------------------------------------------------------------------------------------------------------------------------------------------------------------------------------------------------------------------------------------------------------------------------------------------------------------------------------------------------------------------------------------------------------------------------------------------------------------------------------------------------------------------------------------------------------------------------------------------------------------------------------------------------------------------------------------------------------------------------------------------------------------------------------------------------------------------------------------------------------------------------------------------------------------------------|

|           |                                                                                                                                                                                                                                                                                                                                                                                                                                                                                                                                                                                                                                                                                                                                                                                                                                                                                                                                                                                                                                                                                                                                                                                                                                                                                                                                                                                                                                                                                                                                                                                       |                                                                                                                                                                                                                                                                                                                                                                                                                                                                                                                                                                                                                                                                                                                                                                                                                                                                                                                                                                                                                                                                                                                                                                                                                                                                                                                                                                                             |                                                                                                                                                                                                                                                                                                                                                                                                                                                                                                                                                                                                                                                                                                                                                                                                                                                                                                                                                                                                                                                                                                                                                                                                                                                                                                                                                                     |
|-----------|---------------------------------------------------------------------------------------------------------------------------------------------------------------------------------------------------------------------------------------------------------------------------------------------------------------------------------------------------------------------------------------------------------------------------------------------------------------------------------------------------------------------------------------------------------------------------------------------------------------------------------------------------------------------------------------------------------------------------------------------------------------------------------------------------------------------------------------------------------------------------------------------------------------------------------------------------------------------------------------------------------------------------------------------------------------------------------------------------------------------------------------------------------------------------------------------------------------------------------------------------------------------------------------------------------------------------------------------------------------------------------------------------------------------------------------------------------------------------------------------------------------------------------------------------------------------------------------|---------------------------------------------------------------------------------------------------------------------------------------------------------------------------------------------------------------------------------------------------------------------------------------------------------------------------------------------------------------------------------------------------------------------------------------------------------------------------------------------------------------------------------------------------------------------------------------------------------------------------------------------------------------------------------------------------------------------------------------------------------------------------------------------------------------------------------------------------------------------------------------------------------------------------------------------------------------------------------------------------------------------------------------------------------------------------------------------------------------------------------------------------------------------------------------------------------------------------------------------------------------------------------------------------------------------------------------------------------------------------------------------|---------------------------------------------------------------------------------------------------------------------------------------------------------------------------------------------------------------------------------------------------------------------------------------------------------------------------------------------------------------------------------------------------------------------------------------------------------------------------------------------------------------------------------------------------------------------------------------------------------------------------------------------------------------------------------------------------------------------------------------------------------------------------------------------------------------------------------------------------------------------------------------------------------------------------------------------------------------------------------------------------------------------------------------------------------------------------------------------------------------------------------------------------------------------------------------------------------------------------------------------------------------------------------------------------------------------------------------------------------------------|
| <p>Q2</p> | <p>Immune checkpoints are regulators of the immune system. They are a variety of inhibitory pathways hardwired into the immune system that are crucial for maintaining self-tolerance and modulating the duration and amplitude of physiological immune responses in peripheral tissues to minimize collateral tissue damage.</p> <p>In other words, immune checkpoints are the "brakes" of the immune system. They prevent the immune system from attacking cells indiscriminately, including its own body cells, which can help prevent conditions like autoimmune diseases.</p> <p>However, some cancer cells are able to exploit these checkpoint pathways as a mechanism of immune resistance, particularly against T cells that are specific for tumor antigens. By activating these checkpoints, cancer cells can effectively put the brakes on the immune response, enabling them to evade detection and attack by the immune system.</p> <p>Immune checkpoint inhibitors are a type of cancer treatment that block these checkpoints, effectively taking the brakes off the immune system and allowing it to attack cancer cells. This approach has been successful in treating various types of cancers, including melanoma, lung cancer, kidney cancer, bladder cancer, and Hodgkin lymphoma.</p> <p>Examples of immune checkpoints include programmed cell death protein 1 (PD-1), programmed death-ligand 1 (PD-L1), and cytotoxic T-lymphocyte-associated protein 4 (CTLA-4), all of which have been targeted by immune checkpoint inhibitors in cancer treatments.</p> | <p>Immune checkpoints are proteins on certain immune cells, like T cells, that need to be activated (or inactivated) to start an immune response. They act as 'brakes' to help keep the immune system under control and prevent it from attacking normal cells in the body.</p> <p>Essentially, immune checkpoints are part of the immune system's complex system of checks and balances. They help to prevent an overly vigorous immune response, which could potentially damage healthy tissues and cause autoimmune diseases.</p> <p>However, some cancer cells are clever and can learn to use these immune checkpoint proteins to avoid being attacked by the immune system. They do this by manipulating these 'brakes', putting them into action to prevent T cells from killing the cancer cells.</p> <p>There are several known immune checkpoints, but the most well-known are PD-1 (programmed cell death protein 1), PD-L1 (programmed death-ligand 1), and CTLA-4 (cytotoxic T-lymphocyte-associated protein 4).</p> <p>Immunotherapy drugs known as checkpoint inhibitors are designed to inhibit these checkpoints, releasing the 'brakes', and allowing the immune system to recognize and attack cancer cells. Some examples of these drugs include pembrolizumab (Keytruda) and nivolumab (Opdivo), which target PD-1, and ipilimumab (Yervoy), which targets CTLA-4.</p> | <p>An immune checkpoint refers to a variety of mechanisms within the immune system that help to regulate or "put a check" on the immune response to avoid damaging the body's own cells. Essentially, they work like switches that can turn an immune response on or off, or like a brake pedal in a car to slow down or stop the response.</p> <p>The immune system has to balance two conflicting demands: it needs to be able to launch a robust attack against foreign cells (like bacteria, viruses, or cancer cells), but it also needs to prevent an overly aggressive response that could harm the body's own cells. This is where immune checkpoints come in; they help maintain this balance.</p> <p>Some of the well-known immune checkpoints include proteins like PD-1 (Programmed cell death protein 1), PD-L1 (Programmed death-ligand 1), and CTLA-4 (Cytotoxic T-lymphocyte-associated protein 4).</p> <p>However, some cancers can exploit these checkpoints to evade the immune system. They can essentially "turn on" these checkpoints to prevent T cells, a type of immune cell, from attacking them. This is where immune checkpoint inhibitors, a type of immunotherapy, can be useful. These drugs are designed to block or inhibit these checkpoints, effectively "releasing the brakes" and allowing T cells to attack cancer cells.</p> |
|-----------|---------------------------------------------------------------------------------------------------------------------------------------------------------------------------------------------------------------------------------------------------------------------------------------------------------------------------------------------------------------------------------------------------------------------------------------------------------------------------------------------------------------------------------------------------------------------------------------------------------------------------------------------------------------------------------------------------------------------------------------------------------------------------------------------------------------------------------------------------------------------------------------------------------------------------------------------------------------------------------------------------------------------------------------------------------------------------------------------------------------------------------------------------------------------------------------------------------------------------------------------------------------------------------------------------------------------------------------------------------------------------------------------------------------------------------------------------------------------------------------------------------------------------------------------------------------------------------------|---------------------------------------------------------------------------------------------------------------------------------------------------------------------------------------------------------------------------------------------------------------------------------------------------------------------------------------------------------------------------------------------------------------------------------------------------------------------------------------------------------------------------------------------------------------------------------------------------------------------------------------------------------------------------------------------------------------------------------------------------------------------------------------------------------------------------------------------------------------------------------------------------------------------------------------------------------------------------------------------------------------------------------------------------------------------------------------------------------------------------------------------------------------------------------------------------------------------------------------------------------------------------------------------------------------------------------------------------------------------------------------------|---------------------------------------------------------------------------------------------------------------------------------------------------------------------------------------------------------------------------------------------------------------------------------------------------------------------------------------------------------------------------------------------------------------------------------------------------------------------------------------------------------------------------------------------------------------------------------------------------------------------------------------------------------------------------------------------------------------------------------------------------------------------------------------------------------------------------------------------------------------------------------------------------------------------------------------------------------------------------------------------------------------------------------------------------------------------------------------------------------------------------------------------------------------------------------------------------------------------------------------------------------------------------------------------------------------------------------------------------------------------|

|           |                                                                                                                                                                                                                                                                                                                                                                                                                                                                                                                                                                                                                                                                                                                                                                                                                                                                                                                                                                                                                                                                                                                                                                                                                                                                                                                                                                                                                                                                                                                                                                                                                                                                                                                                                                                                                                                                                                     |                                                                                                                                                                                                                                                                                                                                                                                                                                                                                                                                                                                                                                                                                                                                                                                                                                                                                                                                                                                                                                                                                                                                                                                                                                                                                                                                                                                                                                                                                                                                                                                                                                                                                                                                                                                                                                                                                                                        |                                                                                                                                                                                                                                                                                                                                                                                                                                                                                                                                                                                                                                                                                                                                                                                                                                                                                                                                                                                                                                                                                                                                                                                                                                                                                                                                                                                                                                                                                                                                                                                                                                                                                                                                                                                              |
|-----------|-----------------------------------------------------------------------------------------------------------------------------------------------------------------------------------------------------------------------------------------------------------------------------------------------------------------------------------------------------------------------------------------------------------------------------------------------------------------------------------------------------------------------------------------------------------------------------------------------------------------------------------------------------------------------------------------------------------------------------------------------------------------------------------------------------------------------------------------------------------------------------------------------------------------------------------------------------------------------------------------------------------------------------------------------------------------------------------------------------------------------------------------------------------------------------------------------------------------------------------------------------------------------------------------------------------------------------------------------------------------------------------------------------------------------------------------------------------------------------------------------------------------------------------------------------------------------------------------------------------------------------------------------------------------------------------------------------------------------------------------------------------------------------------------------------------------------------------------------------------------------------------------------------|------------------------------------------------------------------------------------------------------------------------------------------------------------------------------------------------------------------------------------------------------------------------------------------------------------------------------------------------------------------------------------------------------------------------------------------------------------------------------------------------------------------------------------------------------------------------------------------------------------------------------------------------------------------------------------------------------------------------------------------------------------------------------------------------------------------------------------------------------------------------------------------------------------------------------------------------------------------------------------------------------------------------------------------------------------------------------------------------------------------------------------------------------------------------------------------------------------------------------------------------------------------------------------------------------------------------------------------------------------------------------------------------------------------------------------------------------------------------------------------------------------------------------------------------------------------------------------------------------------------------------------------------------------------------------------------------------------------------------------------------------------------------------------------------------------------------------------------------------------------------------------------------------------------------|----------------------------------------------------------------------------------------------------------------------------------------------------------------------------------------------------------------------------------------------------------------------------------------------------------------------------------------------------------------------------------------------------------------------------------------------------------------------------------------------------------------------------------------------------------------------------------------------------------------------------------------------------------------------------------------------------------------------------------------------------------------------------------------------------------------------------------------------------------------------------------------------------------------------------------------------------------------------------------------------------------------------------------------------------------------------------------------------------------------------------------------------------------------------------------------------------------------------------------------------------------------------------------------------------------------------------------------------------------------------------------------------------------------------------------------------------------------------------------------------------------------------------------------------------------------------------------------------------------------------------------------------------------------------------------------------------------------------------------------------------------------------------------------------|
| <p>Q3</p> | <p>Nivolumab (trade name Opdivo) and pembrolizumab (trade name Keytruda) are two types of immunotherapy drugs known as immune checkpoint inhibitors. They are both monoclonal antibodies, which are a type of protein made in the lab that can bind to substances in the body.</p> <p>Specifically, nivolumab and pembrolizumab target and bind to a protein called PD-1 (programmed death receptor-1) on the surface of T cells, a type of immune cell. Under normal conditions, another protein called PD-L1, which is often overexpressed on cancer cells, can bind to PD-1, sending a signal that protects the cancer cell from immune attack. Nivolumab and pembrolizumab prevent this interaction by binding to PD-1, thereby enabling the immune system to recognize and destroy cancer cells.</p> <p>Both nivolumab and pembrolizumab are used in the treatment of several types of cancer, including melanoma, non-small cell lung cancer, kidney cancer, bladder cancer, head and neck cancers, and Hodgkin's lymphoma, among others. The specific indications for each drug can depend on factors like the type and stage of the cancer, and whether the patient has been treated with other therapies previously.</p> <p>As with all cancer treatments, these drugs can have side effects, which can include fatigue, cough, nausea, skin rash, and immune-related side effects, such as inflammation in the lungs (pneumonitis), liver (hepatitis), or intestines (colitis). However, not everyone who takes these medications will experience side effects, and when they do occur, they can often be managed effectively with the help of the healthcare team.</p> <p>It's also important to note that the effectiveness of these treatments can vary from person to person, and research is ongoing to identify which patients are most likely to benefit from these therapies.</p> | <p>Nivolumab and pembrolizumab are both immunotherapy drugs that are used to treat several types of cancer. They belong to a class of drugs known as immune checkpoint inhibitors, specifically, PD-1 inhibitors.</p> <p>Here's a bit more about each:</p> <ol style="list-style-type: none"> <li><b>**Nivolumab (Opdivo)**:</b> This is a medication used to treat a variety of cancers, including melanoma, lung cancer, kidney cancer, head and neck cancer, Hodgkin's lymphoma, and bladder cancer. The drug works by inhibiting the programmed cell death protein 1 (PD-1) pathway, which is a mechanism that tumors use to evade the immune system. By inhibiting this pathway, nivolumab helps the immune system attack cancer cells.</li> <li><b>**Pembrolizumab (Keytruda)**:</b> This is another PD-1 inhibitor used to treat several types of cancer, including melanoma, non-small cell lung cancer, head and neck squamous cell cancer, Hodgkin's lymphoma, and stomach cancer. Like nivolumab, pembrolizumab works by blocking the PD-1 pathway, enabling the immune system to better recognize and destroy cancer cells.</li> </ol> <p>Both of these drugs are administered through intravenous infusion. They work by helping the body's immune system fight cancer, but they can also cause the immune system to attack normal organs and tissues in many areas of the body, leading to side effects, some of which can be serious or even life-threatening. These can include fatigue, cough, nausea, skin rash, and immune-related adverse events, such as inflammation of the lungs, colon, liver, or hormone-producing glands.</p> <p>It's important to note that the response to these drugs can vary from person to person, and they are typically used when cancer has advanced or has spread to other parts of the body, or when other treatments haven't worked or have stopped working.</p> | <p>Nivolumab and pembrolizumab are types of immunotherapy drugs known as immune checkpoint inhibitors, specifically they are PD-1 (Programmed cell death protein 1) inhibitors.</p> <p>Here's a brief description of each:</p> <ol style="list-style-type: none"> <li><b>**Nivolumab (brand name Opdivo)**:</b> This drug is used to treat certain types of cancer, including melanoma, lung cancer, renal cell carcinoma, Hodgkin's lymphoma, and others. Nivolumab works by blocking the PD-1 receptor on immune cells, known as T cells. Under normal circumstances, the PD-1 receptor can be triggered by cancer cells to 'turn off' these T cells, preventing them from attacking the cancer. By blocking this receptor, Nivolumab allows the T cells to remain active against the cancer cells.</li> <li><b>**Pembrolizumab (brand name Keytruda)**:</b> This drug is also a PD-1 inhibitor, and is used to treat several types of cancer, including melanoma, lung cancer, head and neck cancer, Hodgkin's lymphoma, and stomach cancer among others. Like nivolumab, pembrolizumab works by blocking the interaction between PD-1 and its ligands, PD-L1 and PD-L2, freeing the T cells to attack cancer cells.</li> </ol> <p>Both of these drugs effectively 'release the brakes' on the immune system, allowing it to attack cancer cells more effectively. However, by enhancing the immune response, they can also cause the immune system to attack normal cells, leading to various side effects. These can range from mild symptoms like fatigue and nausea to more serious conditions like inflammation of the lungs (pneumonitis) or colon (colitis). The healthcare team will monitor patients receiving these therapies closely to manage any potential side effects.</p> |
|-----------|-----------------------------------------------------------------------------------------------------------------------------------------------------------------------------------------------------------------------------------------------------------------------------------------------------------------------------------------------------------------------------------------------------------------------------------------------------------------------------------------------------------------------------------------------------------------------------------------------------------------------------------------------------------------------------------------------------------------------------------------------------------------------------------------------------------------------------------------------------------------------------------------------------------------------------------------------------------------------------------------------------------------------------------------------------------------------------------------------------------------------------------------------------------------------------------------------------------------------------------------------------------------------------------------------------------------------------------------------------------------------------------------------------------------------------------------------------------------------------------------------------------------------------------------------------------------------------------------------------------------------------------------------------------------------------------------------------------------------------------------------------------------------------------------------------------------------------------------------------------------------------------------------------|------------------------------------------------------------------------------------------------------------------------------------------------------------------------------------------------------------------------------------------------------------------------------------------------------------------------------------------------------------------------------------------------------------------------------------------------------------------------------------------------------------------------------------------------------------------------------------------------------------------------------------------------------------------------------------------------------------------------------------------------------------------------------------------------------------------------------------------------------------------------------------------------------------------------------------------------------------------------------------------------------------------------------------------------------------------------------------------------------------------------------------------------------------------------------------------------------------------------------------------------------------------------------------------------------------------------------------------------------------------------------------------------------------------------------------------------------------------------------------------------------------------------------------------------------------------------------------------------------------------------------------------------------------------------------------------------------------------------------------------------------------------------------------------------------------------------------------------------------------------------------------------------------------------------|----------------------------------------------------------------------------------------------------------------------------------------------------------------------------------------------------------------------------------------------------------------------------------------------------------------------------------------------------------------------------------------------------------------------------------------------------------------------------------------------------------------------------------------------------------------------------------------------------------------------------------------------------------------------------------------------------------------------------------------------------------------------------------------------------------------------------------------------------------------------------------------------------------------------------------------------------------------------------------------------------------------------------------------------------------------------------------------------------------------------------------------------------------------------------------------------------------------------------------------------------------------------------------------------------------------------------------------------------------------------------------------------------------------------------------------------------------------------------------------------------------------------------------------------------------------------------------------------------------------------------------------------------------------------------------------------------------------------------------------------------------------------------------------------|



|                  |                                                                                                                                                                                                                                                                                                                                                                                                                                                                                                                                                                                                                                                                                                                                                                                                                                                                                                                                                                                                                                                                                                                                                                                                                                                                                                                                                                                                                                                                                                                                                                                                                                                                                                                                           |                                                                                                                                                                                                                                                                                                                                                                                                                                                                                                                                                                                                                                                                                                                                                                                                                                                                                                                                                                                                                                                                                                                                                                                                                                                                                                                                                                                                                                                                                                                                                                                                                                                                                                                                                                                                                                                                                             |                                                                                                                                                                                                                                                                                                                                                                                                                                                                                                                                                                                                                                                                                                                                                                                                                                                                                                                                                                                                                                                                                                                                                                                                                                                                                                                                                                                                                                                                                                                                                                                                                    |
|------------------|-------------------------------------------------------------------------------------------------------------------------------------------------------------------------------------------------------------------------------------------------------------------------------------------------------------------------------------------------------------------------------------------------------------------------------------------------------------------------------------------------------------------------------------------------------------------------------------------------------------------------------------------------------------------------------------------------------------------------------------------------------------------------------------------------------------------------------------------------------------------------------------------------------------------------------------------------------------------------------------------------------------------------------------------------------------------------------------------------------------------------------------------------------------------------------------------------------------------------------------------------------------------------------------------------------------------------------------------------------------------------------------------------------------------------------------------------------------------------------------------------------------------------------------------------------------------------------------------------------------------------------------------------------------------------------------------------------------------------------------------|---------------------------------------------------------------------------------------------------------------------------------------------------------------------------------------------------------------------------------------------------------------------------------------------------------------------------------------------------------------------------------------------------------------------------------------------------------------------------------------------------------------------------------------------------------------------------------------------------------------------------------------------------------------------------------------------------------------------------------------------------------------------------------------------------------------------------------------------------------------------------------------------------------------------------------------------------------------------------------------------------------------------------------------------------------------------------------------------------------------------------------------------------------------------------------------------------------------------------------------------------------------------------------------------------------------------------------------------------------------------------------------------------------------------------------------------------------------------------------------------------------------------------------------------------------------------------------------------------------------------------------------------------------------------------------------------------------------------------------------------------------------------------------------------------------------------------------------------------------------------------------------------|--------------------------------------------------------------------------------------------------------------------------------------------------------------------------------------------------------------------------------------------------------------------------------------------------------------------------------------------------------------------------------------------------------------------------------------------------------------------------------------------------------------------------------------------------------------------------------------------------------------------------------------------------------------------------------------------------------------------------------------------------------------------------------------------------------------------------------------------------------------------------------------------------------------------------------------------------------------------------------------------------------------------------------------------------------------------------------------------------------------------------------------------------------------------------------------------------------------------------------------------------------------------------------------------------------------------------------------------------------------------------------------------------------------------------------------------------------------------------------------------------------------------------------------------------------------------------------------------------------------------|
| <p><b>Q4</b></p> | <p>Relatlimab is a monoclonal antibody that is used as an immune checkpoint inhibitor in the treatment of cancer. This drug works by binding to a protein known as LAG-3 (lymphocyte activation gene-3), which is found on the surface of immune cells, specifically T cells.</p> <p>T cells are a type of white blood cell that are crucial in the immune system's ability to fight off diseases, including cancer. However, LAG-3 is an immune checkpoint protein that can inhibit the immune response of these T cells, thereby allowing cancer cells to evade detection and destruction by the immune system.</p> <p>Relatlimab blocks the action of LAG-3, which can help to boost the immune response against cancer cells. By blocking LAG-3, relatlimab can enhance T cell function and promote their ability to attack cancer cells.</p> <p>As of my knowledge cutoff in September 2021, relatlimab was being studied in clinical trials for its effectiveness in treating certain types of cancer, including melanoma. Some of these trials were investigating the use of relatlimab in combination with other immune checkpoint inhibitors, such as nivolumab (which targets the PD-1 checkpoint protein).</p> <p>Like other immunotherapies, relatlimab has the potential to cause side effects related to an overactive immune response, which can lead to inflammation in various parts of the body. The specific side effects can depend on various factors, including the patient's overall health and the type of cancer being treated.</p> <p>Always consult a healthcare provider or oncologist for the most up-to-date and personalized information regarding cancer treatments and their potential side effects.</p> | <p>Relatlimab is an investigational monoclonal antibody that works as an immune checkpoint inhibitor for the treatment of cancer. It binds to and inhibits the function of LAG-3 (Lymphocyte-activation gene 3), a protein found on the surface of immune cells, particularly T cells.</p> <p>In a healthy immune response, LAG-3 plays a role in regulating the immune system and preventing it from overreacting, which can potentially damage healthy tissues. However, many cancer cells have found ways to exploit this system, expressing proteins that can activate immune checkpoints like LAG-3. This can suppress the immune response, allowing the cancer cells to grow and spread without being attacked by the immune system.</p> <p>By inhibiting LAG-3, relatlimab can potentially enhance the immune system's response against cancer cells. This can make it an effective treatment for certain types of cancers.</p> <p>As of my knowledge cutoff in September 2021, relatlimab was being studied in various stages of clinical trials, often in combination with other drugs like nivolumab, an immune checkpoint inhibitor that targets PD-1 (another immune checkpoint). Preliminary results have shown promise, particularly for treating melanoma, but more research is needed to determine the full potential of this therapy.</p> <p>Like other cancer therapies, relatlimab can have side effects, which can range from mild to severe. These side effects are usually related to the immune system's increased activity, and can include symptoms like fatigue, rash, and diarrhea, among others. Severe immune-related side effects can potentially affect various organs in the body, including the lungs, liver, and colon.</p> <p>Always consult with healthcare providers for the most accurate and up-to-date information regarding cancer treatments.</p> | <p>Relatlimab is a type of immunotherapy known as a checkpoint inhibitor that targets the lymphocyte-activation gene 3 (LAG-3). LAG-3 is a protein on the surface of immune cells, including T cells and Natural Killer (NK) cells, that plays a critical role in controlling immune responses.</p> <p>Cancer cells often exploit these checkpoints to evade the immune system, essentially using them to put the brakes on immune responses. By inhibiting LAG-3, relatlimab aims to take off these brakes, enabling the immune system to attack cancer cells more effectively.</p> <p>As of my last training data in September 2021, relatlimab was being investigated in clinical trials for use in various cancers, including melanoma, often in combination with other immune checkpoint inhibitors like nivolumab (a PD-1 inhibitor). The trials aimed to evaluate the safety, efficacy, and optimal dosing of the drug.</p> <p>Like all cancer treatments, relatlimab can have side effects, typically a result of the immune system becoming overly active. These can include fatigue, skin rash, and gastrointestinal problems, among others. It's also possible to have serious immune-related side effects that can affect normal function of the lungs, liver, intestines, hormone-producing glands, or other organs.</p> <p>However, the occurrence and severity of side effects can vary greatly from patient to patient, and many side effects can be managed effectively with appropriate medical care. Always consult a healthcare provider for the most accurate and up-to-date information.</p> |
|------------------|-------------------------------------------------------------------------------------------------------------------------------------------------------------------------------------------------------------------------------------------------------------------------------------------------------------------------------------------------------------------------------------------------------------------------------------------------------------------------------------------------------------------------------------------------------------------------------------------------------------------------------------------------------------------------------------------------------------------------------------------------------------------------------------------------------------------------------------------------------------------------------------------------------------------------------------------------------------------------------------------------------------------------------------------------------------------------------------------------------------------------------------------------------------------------------------------------------------------------------------------------------------------------------------------------------------------------------------------------------------------------------------------------------------------------------------------------------------------------------------------------------------------------------------------------------------------------------------------------------------------------------------------------------------------------------------------------------------------------------------------|---------------------------------------------------------------------------------------------------------------------------------------------------------------------------------------------------------------------------------------------------------------------------------------------------------------------------------------------------------------------------------------------------------------------------------------------------------------------------------------------------------------------------------------------------------------------------------------------------------------------------------------------------------------------------------------------------------------------------------------------------------------------------------------------------------------------------------------------------------------------------------------------------------------------------------------------------------------------------------------------------------------------------------------------------------------------------------------------------------------------------------------------------------------------------------------------------------------------------------------------------------------------------------------------------------------------------------------------------------------------------------------------------------------------------------------------------------------------------------------------------------------------------------------------------------------------------------------------------------------------------------------------------------------------------------------------------------------------------------------------------------------------------------------------------------------------------------------------------------------------------------------------|--------------------------------------------------------------------------------------------------------------------------------------------------------------------------------------------------------------------------------------------------------------------------------------------------------------------------------------------------------------------------------------------------------------------------------------------------------------------------------------------------------------------------------------------------------------------------------------------------------------------------------------------------------------------------------------------------------------------------------------------------------------------------------------------------------------------------------------------------------------------------------------------------------------------------------------------------------------------------------------------------------------------------------------------------------------------------------------------------------------------------------------------------------------------------------------------------------------------------------------------------------------------------------------------------------------------------------------------------------------------------------------------------------------------------------------------------------------------------------------------------------------------------------------------------------------------------------------------------------------------|

|           |                                                                                                                                                                                                                                                                                                                                                                                                                                                                                                                                                                                                                                                                                                                                                                                                                                                                                                                                                                                                                                                                                                                                                                                                                                                                                                                                                                                                                                                                              |                                                                                                                                                                                                                                                                                                                                                                                                                                                                                                                                                                                                                                                                                                                                                                                                                                                                                                                                                                                                                                                                                                                                                                                                                                                                                                                                                                                                                                                                                                                                                |                                                                                                                                                                                                                                                                                                                                                                                                                                                                                                                                                                                                                                                                                                                                                                                                                                                                                                                                                                                                                                                                                                                                                                                                            |
|-----------|------------------------------------------------------------------------------------------------------------------------------------------------------------------------------------------------------------------------------------------------------------------------------------------------------------------------------------------------------------------------------------------------------------------------------------------------------------------------------------------------------------------------------------------------------------------------------------------------------------------------------------------------------------------------------------------------------------------------------------------------------------------------------------------------------------------------------------------------------------------------------------------------------------------------------------------------------------------------------------------------------------------------------------------------------------------------------------------------------------------------------------------------------------------------------------------------------------------------------------------------------------------------------------------------------------------------------------------------------------------------------------------------------------------------------------------------------------------------------|------------------------------------------------------------------------------------------------------------------------------------------------------------------------------------------------------------------------------------------------------------------------------------------------------------------------------------------------------------------------------------------------------------------------------------------------------------------------------------------------------------------------------------------------------------------------------------------------------------------------------------------------------------------------------------------------------------------------------------------------------------------------------------------------------------------------------------------------------------------------------------------------------------------------------------------------------------------------------------------------------------------------------------------------------------------------------------------------------------------------------------------------------------------------------------------------------------------------------------------------------------------------------------------------------------------------------------------------------------------------------------------------------------------------------------------------------------------------------------------------------------------------------------------------|------------------------------------------------------------------------------------------------------------------------------------------------------------------------------------------------------------------------------------------------------------------------------------------------------------------------------------------------------------------------------------------------------------------------------------------------------------------------------------------------------------------------------------------------------------------------------------------------------------------------------------------------------------------------------------------------------------------------------------------------------------------------------------------------------------------------------------------------------------------------------------------------------------------------------------------------------------------------------------------------------------------------------------------------------------------------------------------------------------------------------------------------------------------------------------------------------------|
| <p>Q5</p> | <p>Gardasil is a vaccine that targets certain types of the human papillomavirus (HPV). HPV is a group of more than 200 related viruses, of which more than 40 types can be easily spread through direct sexual contact.</p> <p>HPV is the most common sexually transmitted infection, and while many HPV infections are harmless and clear up on their own, some types can lead to genital warts or even cancer, including cervical, vaginal, vulvar, penile, anal, and oropharyngeal (head and neck) cancers.</p> <p>Gardasil specifically targets four types of HPV: types 6, 11, 16, and 18. HPV types 16 and 18 are high-risk types that cause the majority of HPV-related cancers, while HPV types 6 and 11 cause about 90% of genital warts.</p> <p>Gardasil works by introducing a protein that mimics the outer surface of the HPV virus into the body. This protein does not cause an HPV infection or cancer, but it does stimulate the immune system to produce an immune response. This response, including the production of antibodies, can help protect against future infections with these types of HPV.</p> <p>Gardasil is recommended for both males and females, typically in their preteen or early teenage years, before they may become sexually active and potentially exposed to HPV. However, the vaccine can be given to both younger children and older adults as well. It's administered in a series of injections over a period of months.</p> | <p>Gardasil is a vaccine that targets specific strains of the human papillomavirus (HPV). HPV is a group of over 200 viruses, and is the most common sexually transmitted infection. While many types of HPV are harmless, certain strains can cause serious health problems, such as genital warts and cancers including cervical, anal, oropharyngeal (back of the throat), penile, vulvar, and vaginal cancers.</p> <p>Gardasil targets four types of HPV:</p> <ol style="list-style-type: none"> <li>1. HPV type 6 and 11: These types cause about 90% of genital warts.</li> <li>2. HPV type 16 and 18: These are high-risk types of HPV responsible for about 70% of cervical cancer cases, as well as a significant proportion of other HPV-related cancers.</li> </ol> <p>The Gardasil vaccine does not contain live viruses. Instead, it is made up of virus-like particles (VLPs) that resemble the structure of actual HPV viruses. These VLPs cannot cause an infection, but they do stimulate the body's immune system to produce an immune response, including the production of antibodies. If a vaccinated individual is later exposed to these types of HPV, the body is ready to fight off the virus.</p> <p>As of my knowledge cutoff in September 2021, there are different versions of the Gardasil vaccine available. The newest version, Gardasil 9, protects against an additional five types of HPV (31, 33, 45, 52, and 58) that can also cause cancer, making it protective against nine types of HPV in total.</p> | <p>Gardasil is a vaccine that is designed to protect against certain types of the human papillomavirus (HPV). HPV is a group of more than 200 related viruses, more than 40 of which are passed through direct sexual contact. Some types of HPV can lead to cancer or genital warts.</p> <p>The original Gardasil, now often referred to as Gardasil 4, targets four types of HPV:</p> <ul style="list-style-type: none"> <li>- HPV types 16 and 18, which are responsible for the majority of HPV-caused cancers, including about 70% of cervical cancers and many cases of anal, penile, vaginal, vulvar, and oropharyngeal (throat) cancers.</li> <li>- HPV types 6 and 11, which cause about 90% of genital warts cases.</li> </ul> <p>The newer version, Gardasil 9, targets an additional five HPV types (31, 33, 45, 52, and 58) which are also linked to cancers, bringing the total number of HPV types it protects against to nine.</p> <p>Gardasil and Gardasil 9 work by stimulating the immune system to produce an immune response, including the production of antibodies, to these types of HPV. This helps protect vaccinated individuals from future infections with these viruses.</p> |
|-----------|------------------------------------------------------------------------------------------------------------------------------------------------------------------------------------------------------------------------------------------------------------------------------------------------------------------------------------------------------------------------------------------------------------------------------------------------------------------------------------------------------------------------------------------------------------------------------------------------------------------------------------------------------------------------------------------------------------------------------------------------------------------------------------------------------------------------------------------------------------------------------------------------------------------------------------------------------------------------------------------------------------------------------------------------------------------------------------------------------------------------------------------------------------------------------------------------------------------------------------------------------------------------------------------------------------------------------------------------------------------------------------------------------------------------------------------------------------------------------|------------------------------------------------------------------------------------------------------------------------------------------------------------------------------------------------------------------------------------------------------------------------------------------------------------------------------------------------------------------------------------------------------------------------------------------------------------------------------------------------------------------------------------------------------------------------------------------------------------------------------------------------------------------------------------------------------------------------------------------------------------------------------------------------------------------------------------------------------------------------------------------------------------------------------------------------------------------------------------------------------------------------------------------------------------------------------------------------------------------------------------------------------------------------------------------------------------------------------------------------------------------------------------------------------------------------------------------------------------------------------------------------------------------------------------------------------------------------------------------------------------------------------------------------|------------------------------------------------------------------------------------------------------------------------------------------------------------------------------------------------------------------------------------------------------------------------------------------------------------------------------------------------------------------------------------------------------------------------------------------------------------------------------------------------------------------------------------------------------------------------------------------------------------------------------------------------------------------------------------------------------------------------------------------------------------------------------------------------------------------------------------------------------------------------------------------------------------------------------------------------------------------------------------------------------------------------------------------------------------------------------------------------------------------------------------------------------------------------------------------------------------|

|           |                                                                                                                                                                                                                                                                                                                                                                                                                                                                                                                                                                                                                                                                                                                                                                                                                                                                                                                                                                                                                                                                                                                                                                                                                                                                                                                                                                                                                                                                                                                                                                                                                                                                                                                                                                                                                                                                                                                                                                                                                                                                                                                                                                                                                                                                                                                                                                                                                                                                   |                                                                                                                                                                                                                                                                                                                                                                                                                                                                                                                                                                                                                                                                                                                                                                                                                                                                                                                                                                                                                                                                                                                                                                                                                                                                                                                                                                                                                                                                                                                                                                                                                                                                                                                                                                                                                                                                                                                                                                                                                                                                        |                                                                                                                                                                                                                                                                                                                                                                                                                                                                                                                                                                                                                                                                                                                                                                                                                                                                                                                                                                                                                                                                                                                                                                                                                                                                                                                                                                                                                                                                                                                                                                                                                                                                                                                                                                                                                                                                                                                                                                                                                                                                                                                                                                                                                         |
|-----------|-------------------------------------------------------------------------------------------------------------------------------------------------------------------------------------------------------------------------------------------------------------------------------------------------------------------------------------------------------------------------------------------------------------------------------------------------------------------------------------------------------------------------------------------------------------------------------------------------------------------------------------------------------------------------------------------------------------------------------------------------------------------------------------------------------------------------------------------------------------------------------------------------------------------------------------------------------------------------------------------------------------------------------------------------------------------------------------------------------------------------------------------------------------------------------------------------------------------------------------------------------------------------------------------------------------------------------------------------------------------------------------------------------------------------------------------------------------------------------------------------------------------------------------------------------------------------------------------------------------------------------------------------------------------------------------------------------------------------------------------------------------------------------------------------------------------------------------------------------------------------------------------------------------------------------------------------------------------------------------------------------------------------------------------------------------------------------------------------------------------------------------------------------------------------------------------------------------------------------------------------------------------------------------------------------------------------------------------------------------------------------------------------------------------------------------------------------------------|------------------------------------------------------------------------------------------------------------------------------------------------------------------------------------------------------------------------------------------------------------------------------------------------------------------------------------------------------------------------------------------------------------------------------------------------------------------------------------------------------------------------------------------------------------------------------------------------------------------------------------------------------------------------------------------------------------------------------------------------------------------------------------------------------------------------------------------------------------------------------------------------------------------------------------------------------------------------------------------------------------------------------------------------------------------------------------------------------------------------------------------------------------------------------------------------------------------------------------------------------------------------------------------------------------------------------------------------------------------------------------------------------------------------------------------------------------------------------------------------------------------------------------------------------------------------------------------------------------------------------------------------------------------------------------------------------------------------------------------------------------------------------------------------------------------------------------------------------------------------------------------------------------------------------------------------------------------------------------------------------------------------------------------------------------------------|-------------------------------------------------------------------------------------------------------------------------------------------------------------------------------------------------------------------------------------------------------------------------------------------------------------------------------------------------------------------------------------------------------------------------------------------------------------------------------------------------------------------------------------------------------------------------------------------------------------------------------------------------------------------------------------------------------------------------------------------------------------------------------------------------------------------------------------------------------------------------------------------------------------------------------------------------------------------------------------------------------------------------------------------------------------------------------------------------------------------------------------------------------------------------------------------------------------------------------------------------------------------------------------------------------------------------------------------------------------------------------------------------------------------------------------------------------------------------------------------------------------------------------------------------------------------------------------------------------------------------------------------------------------------------------------------------------------------------------------------------------------------------------------------------------------------------------------------------------------------------------------------------------------------------------------------------------------------------------------------------------------------------------------------------------------------------------------------------------------------------------------------------------------------------------------------------------------------------|
| <p>Q6</p> | <p>Cancer can indeed have a complex and multi-faceted impact on the immune system. Here are some ways that cancer can affect the immune system:</p> <ol style="list-style-type: none"> <li><b>Evading immune detection</b>: Cancer cells can sometimes avoid being detected by the immune system. This is because they originate from our own body's cells and can therefore appear as normal, healthy cells to the immune system. Some cancer cells can also release chemicals that suppress the immune response or disguise themselves as immune cells.</li> <li><b>Immune suppression</b>: Certain types of cancers, particularly blood cancers such as leukemia and lymphoma, can directly harm the immune system by crowding out healthy immune cells in the bone marrow. This reduces the body's ability to produce new immune cells. Also, some cancers can cause general weakening of the immune system, making it harder for the body to fight off infections or diseases.</li> <li><b>Chronic inflammation</b>: Some cancers are associated with chronic inflammation, a long-term overactivation of the immune system. This continuous immune response can eventually lead to DNA damage and contribute to the formation and progression of cancer.</li> <li><b>Manipulating immune checkpoints</b>: Immune checkpoints are part of the immune system's way of preventing it from attacking the body's own cells. Some cancers can take advantage of these checkpoints to shield themselves from the immune system's attacks.</li> <li><b>Nutritional impact</b>: Many people with advanced cancer experience significant weight loss, including muscle loss. This can affect the immune system, as proper nutrition is important for maintaining immune health. In addition, treatments for cancer, such as chemotherapy and radiation, can also weaken the immune system by damaging healthy cells, including immune cells, while targeting cancer cells.</li> </ol> <p>Immunotherapies are a type of treatment that work by harnessing the power of the immune system to fight cancer. Some of these therapies work by boosting the overall activity of the immune system, while others help the immune system specifically target cancer cells.</p> <p>Despite these challenges, many strategies are being researched and utilized to stimulate the immune system's response to cancer and to minimize the impacts of cancer on immune health.</p> | <p>Yes, cancer can indeed interfere with the immune system in several ways, both directly and indirectly.</p> <ol style="list-style-type: none"> <li><b>Immune Evasion</b>: Cancer cells originate from our own body's cells, and they have ways of disguising themselves to avoid detection by the immune system. They may not present enough antigens (substances that trigger an immune response) for the immune cells to recognize them as harmful. Some cancers can even mimic the signals used by healthy cells to turn off immune responses.</li> <li><b>Immune Suppression</b>: Certain types of cancers, particularly those that affect the bone marrow where new blood cells (including immune cells) are made, can directly suppress the immune system. Leukemias and lymphomas, for instance, can crowd out healthy cells in the bone marrow, resulting in fewer immune cells being produced. Some cancer cells also secrete substances that suppress immune responses.</li> <li><b>Manipulating Checkpoint Pathways</b>: The immune system has built-in "checkpoints" to prevent it from attacking the body's own healthy cells. Some cancer cells can exploit these checkpoints to protect themselves from being attacked by the immune system. This is why some of the newer cancer treatments, known as checkpoint inhibitors, work to block these checkpoints and allow the immune system to attack the cancer cells.</li> <li><b>Impact of Cancer Treatments</b>: Treatments such as chemotherapy and radiation therapy, while targeting cancer cells, can also damage healthy cells, including those of the immune system. This can result in a weakened immune system and increased susceptibility to infections.</li> </ol> <p>It's important to note that while cancer can hinder the immune system, the immune system is also key in fighting against cancer. Many ongoing research studies and treatments, such as immunotherapies, are focused on harnessing and enhancing the power of the immune system to better fight against cancer.</p> | <p>Yes, cancer can have various impacts on the immune system. This occurs both because of the cancer itself and the treatments used to fight it. Here are some ways that cancer can affect the immune system:</p> <ol style="list-style-type: none"> <li><b>Immune Evasion</b>: Cancer cells are mutated versions of our own body's cells, and some have found ways to evade detection by the immune system. They may produce signals that prevent immune cells from recognizing them as a threat, or they might hide or reduce the display of specific markers that would normally attract immune cells.</li> <li><b>Immune Suppression</b>: Some types of cancer, especially those affecting the bone marrow (like leukemia), can crowd out healthy cells and impair the production of new immune cells, weakening the immune system. Moreover, some cancers can release substances that suppress the immune system, helping the cancer cells to survive and proliferate.</li> <li><b>Influence on Immune Checkpoints</b>: Immune checkpoints are regulators of the immune system that prevent it from attacking the body's own cells. Some cancers can manipulate these checkpoints to shield themselves from immune attacks.</li> <li><b>Effects of Cancer Treatments</b>: Treatments like chemotherapy and radiation therapy can harm healthy cells while destroying cancer cells, leading to a weakened immune system. This can make the patient more susceptible to infections.</li> <li><b>Nutritional and Metabolic Changes</b>: Cancer can cause significant changes in the body's metabolism, often leading to weight loss, including muscle wasting, which can impact the immune system's function. This is often exacerbated by the fact that cancer can reduce appetite, alter taste and smell, and cause nausea, making adequate nutrition challenging.</li> </ol> <p>Therefore, while the immune system is a critical part of the body's defense against cancer, the disease can employ various strategies to evade and weaken it. It's also worth noting that a growing area of cancer treatment, known as immunotherapy, aims to leverage the immune system to better fight against cancer cells.</p> |
|-----------|-------------------------------------------------------------------------------------------------------------------------------------------------------------------------------------------------------------------------------------------------------------------------------------------------------------------------------------------------------------------------------------------------------------------------------------------------------------------------------------------------------------------------------------------------------------------------------------------------------------------------------------------------------------------------------------------------------------------------------------------------------------------------------------------------------------------------------------------------------------------------------------------------------------------------------------------------------------------------------------------------------------------------------------------------------------------------------------------------------------------------------------------------------------------------------------------------------------------------------------------------------------------------------------------------------------------------------------------------------------------------------------------------------------------------------------------------------------------------------------------------------------------------------------------------------------------------------------------------------------------------------------------------------------------------------------------------------------------------------------------------------------------------------------------------------------------------------------------------------------------------------------------------------------------------------------------------------------------------------------------------------------------------------------------------------------------------------------------------------------------------------------------------------------------------------------------------------------------------------------------------------------------------------------------------------------------------------------------------------------------------------------------------------------------------------------------------------------------|------------------------------------------------------------------------------------------------------------------------------------------------------------------------------------------------------------------------------------------------------------------------------------------------------------------------------------------------------------------------------------------------------------------------------------------------------------------------------------------------------------------------------------------------------------------------------------------------------------------------------------------------------------------------------------------------------------------------------------------------------------------------------------------------------------------------------------------------------------------------------------------------------------------------------------------------------------------------------------------------------------------------------------------------------------------------------------------------------------------------------------------------------------------------------------------------------------------------------------------------------------------------------------------------------------------------------------------------------------------------------------------------------------------------------------------------------------------------------------------------------------------------------------------------------------------------------------------------------------------------------------------------------------------------------------------------------------------------------------------------------------------------------------------------------------------------------------------------------------------------------------------------------------------------------------------------------------------------------------------------------------------------------------------------------------------------|-------------------------------------------------------------------------------------------------------------------------------------------------------------------------------------------------------------------------------------------------------------------------------------------------------------------------------------------------------------------------------------------------------------------------------------------------------------------------------------------------------------------------------------------------------------------------------------------------------------------------------------------------------------------------------------------------------------------------------------------------------------------------------------------------------------------------------------------------------------------------------------------------------------------------------------------------------------------------------------------------------------------------------------------------------------------------------------------------------------------------------------------------------------------------------------------------------------------------------------------------------------------------------------------------------------------------------------------------------------------------------------------------------------------------------------------------------------------------------------------------------------------------------------------------------------------------------------------------------------------------------------------------------------------------------------------------------------------------------------------------------------------------------------------------------------------------------------------------------------------------------------------------------------------------------------------------------------------------------------------------------------------------------------------------------------------------------------------------------------------------------------------------------------------------------------------------------------------------|

|           |                                                                                                                                                                                                                                                                                                                                                                                                                                                                                                                                                                                                                                                                                                                                                                                                                                                                                                                                                                                                                                                                                                                                                                                                                                                                                                                                                                                                                                                                                                                                                                                                                                                                                                                                                                                                                                                           |                                                                                                                                                                                                                                                                                                                                                                                                                                                                                                                                                                                                                                                                                                                                                                                                                                                                                                                                                                                                                                                                                                                                                                                                                                                                                                                                                                                                                                                                                                                                                                                                                                                                                                                                                                                                                                                                                                                    |                                                                                                                                                                                                                                                                                                                                                                                                                                                                                                                                                                                                                                                                                                                                                                                                                                                                                                                                                                                                                                                                                                                                                                                                                                                                                                                                                                                                                                                                                                                                                                                                                                                                                                                                                                                                                                                                                                                                                                                                                 |
|-----------|-----------------------------------------------------------------------------------------------------------------------------------------------------------------------------------------------------------------------------------------------------------------------------------------------------------------------------------------------------------------------------------------------------------------------------------------------------------------------------------------------------------------------------------------------------------------------------------------------------------------------------------------------------------------------------------------------------------------------------------------------------------------------------------------------------------------------------------------------------------------------------------------------------------------------------------------------------------------------------------------------------------------------------------------------------------------------------------------------------------------------------------------------------------------------------------------------------------------------------------------------------------------------------------------------------------------------------------------------------------------------------------------------------------------------------------------------------------------------------------------------------------------------------------------------------------------------------------------------------------------------------------------------------------------------------------------------------------------------------------------------------------------------------------------------------------------------------------------------------------|--------------------------------------------------------------------------------------------------------------------------------------------------------------------------------------------------------------------------------------------------------------------------------------------------------------------------------------------------------------------------------------------------------------------------------------------------------------------------------------------------------------------------------------------------------------------------------------------------------------------------------------------------------------------------------------------------------------------------------------------------------------------------------------------------------------------------------------------------------------------------------------------------------------------------------------------------------------------------------------------------------------------------------------------------------------------------------------------------------------------------------------------------------------------------------------------------------------------------------------------------------------------------------------------------------------------------------------------------------------------------------------------------------------------------------------------------------------------------------------------------------------------------------------------------------------------------------------------------------------------------------------------------------------------------------------------------------------------------------------------------------------------------------------------------------------------------------------------------------------------------------------------------------------------|-----------------------------------------------------------------------------------------------------------------------------------------------------------------------------------------------------------------------------------------------------------------------------------------------------------------------------------------------------------------------------------------------------------------------------------------------------------------------------------------------------------------------------------------------------------------------------------------------------------------------------------------------------------------------------------------------------------------------------------------------------------------------------------------------------------------------------------------------------------------------------------------------------------------------------------------------------------------------------------------------------------------------------------------------------------------------------------------------------------------------------------------------------------------------------------------------------------------------------------------------------------------------------------------------------------------------------------------------------------------------------------------------------------------------------------------------------------------------------------------------------------------------------------------------------------------------------------------------------------------------------------------------------------------------------------------------------------------------------------------------------------------------------------------------------------------------------------------------------------------------------------------------------------------------------------------------------------------------------------------------------------------|
| <p>Q7</p> | <p>Programmed cell death 1 (PD-1) is a receptor on immune cells, and its ligand, PD-L1, is a protein that can be expressed on the surface of various cells, including some tumor cells. When PD-1 binds to PD-L1, it sends an inhibitory signal to reduce the activity of the immune cell, which can limit immune responses against cancer cells.</p> <p>Anti-PD-1 and anti-PD-L1 therapies are types of immunotherapy called checkpoint inhibitors. They work by disrupting the interaction between PD-1 and PD-L1, helping to unleash the immune system to fight cancer more effectively.</p> <p>The key difference between them is the specific target:</p> <ol style="list-style-type: none"> <li>1. <b>Anti-PD-1 therapies</b> bind to the PD-1 receptor on immune cells, preventing PD-L1 (and another ligand, PD-L2) from interacting with it.</li> <li>2. <b>Anti-PD-L1 therapies</b> bind to PD-L1 on tumor cells (and other cells), preventing it from interacting with PD-1.</li> </ol> <p>Both anti-PD-1 and anti-PD-L1 therapies can be effective, and the choice between them can depend on a variety of factors, including the specific type of cancer, the patient's overall health, and the presence of other relevant biomarkers. Each can have side effects related to the enhancement of immune responses, which can sometimes lead to immune-related adverse events where the immune system attacks healthy tissues.</p> <p>Examples of anti-PD-1 drugs include pembrolizumab (Keytruda) and nivolumab (Opdivo), while anti-PD-L1 drugs include atezolizumab (Tecentriq), durvalumab (Imfinzi), and avelumab (Bavencio).</p> <p>It's always important for patients to discuss these treatment options with their healthcare team, who can provide the most accurate information tailored to the individual's specific situation.</p> | <p>PD-1 (Programmed Cell Death Protein 1) and PD-L1 (Programmed Death-Ligand 1) are both important components of the immune system and play roles in regulating immune responses. Some cancer cells can exploit these pathways to avoid being attacked by the immune system. Treatments that inhibit PD-1 or PD-L1 are types of immunotherapies designed to boost the immune system's response against cancer cells.</p> <p>Anti-PD-1 and anti-PD-L1 treatments both aim to prevent the interaction between PD-1 and PD-L1, but they do so in slightly different ways:</p> <ul style="list-style-type: none"> <li>- <b>Anti-PD-1 treatments</b> target the PD-1 protein on the surface of immune cells. By blocking PD-1, these treatments prevent it from interacting with PD-L1 and PD-L2 (another ligand of PD-1), and this can help to enhance immune responses against cancer cells. Examples of anti-PD-1 drugs include nivolumab (Opdivo) and pembrolizumab (Keytruda).</li> <li>- <b>Anti-PD-L1 treatments</b> target the PD-L1 protein, which can be present on the surface of some normal cells and some cancer cells. By blocking PD-L1, these treatments prevent it from interacting with PD-1, which can also help to boost immune responses against cancer cells. Examples of anti-PD-L1 drugs include atezolizumab (Tecentriq), durvalumab (Imfinzi), and avelumab (Bavencio).</li> </ul> <p>The choice between anti-PD-1 and anti-PD-L1 treatment can depend on various factors, including the specific type and stage of cancer, the patient's overall health, and the presence of PD-L1 on the tumor cells (which can sometimes be assessed with a test).</p> <p>Both types of treatment can potentially cause side effects related to immune system activation, and it's important for patients to discuss the potential benefits and risks of these treatments with their healthcare team.</p> | <p>PD-1 (Programmed Cell Death Protein 1) and PD-L1 (Programmed Death-Ligand 1) are proteins that play critical roles in the immune system's ability to attack cells, including cancer cells. In some cases, cancer cells can exploit these proteins to escape from the immune system's attacks.</p> <p>Anti-PD-1 and anti-PD-L1 treatments are types of immunotherapy that aim to prevent this immune evasion by blocking the interactions between PD-1 and PD-L1, thereby allowing the immune system to recognize and attack the cancer cells. However, they do so in different ways:</p> <ul style="list-style-type: none"> <li>- <b>Anti-PD-1 therapies</b> (such as nivolumab and pembrolizumab) bind to the PD-1 protein on the surface of immune cells called T cells. By doing so, they block PD-1's ability to bind with PD-L1, which is often overexpressed on the surface of cancer cells. This can help to reactivate the T cells and enhance their ability to attack the cancer cells.</li> <li>- <b>Anti-PD-L1 therapies</b> (such as atezolizumab, durvalumab, and avelumab) bind to PD-L1 proteins, which can be expressed on cancer cells and some normal cells. By binding to PD-L1, these therapies prevent it from interacting with PD-1 on T cells, which can help to enhance the immune response against the cancer cells.</li> </ul> <p>Both types of treatments can be effective in treating certain types of cancers, and the choice between them can depend on a variety of factors, including the specific type and stage of the cancer, the patient's overall health, and the expression of PD-L1 in the tumor.</p> <p>It's important to note that while these treatments can help to enhance the immune system's ability to attack cancer cells, they can also lead to overactivation of the immune system, potentially causing a range of side effects. Therefore, the potential benefits and risks of these treatments need to be carefully weighed in each individual case.</p> |
|-----------|-----------------------------------------------------------------------------------------------------------------------------------------------------------------------------------------------------------------------------------------------------------------------------------------------------------------------------------------------------------------------------------------------------------------------------------------------------------------------------------------------------------------------------------------------------------------------------------------------------------------------------------------------------------------------------------------------------------------------------------------------------------------------------------------------------------------------------------------------------------------------------------------------------------------------------------------------------------------------------------------------------------------------------------------------------------------------------------------------------------------------------------------------------------------------------------------------------------------------------------------------------------------------------------------------------------------------------------------------------------------------------------------------------------------------------------------------------------------------------------------------------------------------------------------------------------------------------------------------------------------------------------------------------------------------------------------------------------------------------------------------------------------------------------------------------------------------------------------------------------|--------------------------------------------------------------------------------------------------------------------------------------------------------------------------------------------------------------------------------------------------------------------------------------------------------------------------------------------------------------------------------------------------------------------------------------------------------------------------------------------------------------------------------------------------------------------------------------------------------------------------------------------------------------------------------------------------------------------------------------------------------------------------------------------------------------------------------------------------------------------------------------------------------------------------------------------------------------------------------------------------------------------------------------------------------------------------------------------------------------------------------------------------------------------------------------------------------------------------------------------------------------------------------------------------------------------------------------------------------------------------------------------------------------------------------------------------------------------------------------------------------------------------------------------------------------------------------------------------------------------------------------------------------------------------------------------------------------------------------------------------------------------------------------------------------------------------------------------------------------------------------------------------------------------|-----------------------------------------------------------------------------------------------------------------------------------------------------------------------------------------------------------------------------------------------------------------------------------------------------------------------------------------------------------------------------------------------------------------------------------------------------------------------------------------------------------------------------------------------------------------------------------------------------------------------------------------------------------------------------------------------------------------------------------------------------------------------------------------------------------------------------------------------------------------------------------------------------------------------------------------------------------------------------------------------------------------------------------------------------------------------------------------------------------------------------------------------------------------------------------------------------------------------------------------------------------------------------------------------------------------------------------------------------------------------------------------------------------------------------------------------------------------------------------------------------------------------------------------------------------------------------------------------------------------------------------------------------------------------------------------------------------------------------------------------------------------------------------------------------------------------------------------------------------------------------------------------------------------------------------------------------------------------------------------------------------------|

|           |                                                                                                                                                                                                                                                                                                                                                                                                                                                                                                                                                                                                                                                                                                                                                                                                                                                                                                                                                                                                                                                                                                                                                                                                                                                                                                                                                                                                                                                                                                                                                                                                                                                                                                                                                                                                                                                                                                                                                                                                                                                                                                                                                                                                                                                                                        |                                                                                                                                                                                                                                                                                                                                                                                                                                                                                                                                                                                                                                                                                                                                                                                                                                                                                                                                                                                                                                                                                                                                                                                                                                                                                                                                                                                                                                                                                                                                                                                                                                                                                                                                                                                                                                                                                                                                                                                         |                                                                                                                                                                                                                                                                                                                                                                                                                                                                                                                                                                                                                                                                                                                                                                                                                                                                                                                                                                                                                                                                                                                                                                                                                                                                                                                                                                                                                                                                                                                                                                                                                                                                                                                                                                                                                                                                                                                                         |
|-----------|----------------------------------------------------------------------------------------------------------------------------------------------------------------------------------------------------------------------------------------------------------------------------------------------------------------------------------------------------------------------------------------------------------------------------------------------------------------------------------------------------------------------------------------------------------------------------------------------------------------------------------------------------------------------------------------------------------------------------------------------------------------------------------------------------------------------------------------------------------------------------------------------------------------------------------------------------------------------------------------------------------------------------------------------------------------------------------------------------------------------------------------------------------------------------------------------------------------------------------------------------------------------------------------------------------------------------------------------------------------------------------------------------------------------------------------------------------------------------------------------------------------------------------------------------------------------------------------------------------------------------------------------------------------------------------------------------------------------------------------------------------------------------------------------------------------------------------------------------------------------------------------------------------------------------------------------------------------------------------------------------------------------------------------------------------------------------------------------------------------------------------------------------------------------------------------------------------------------------------------------------------------------------------------|-----------------------------------------------------------------------------------------------------------------------------------------------------------------------------------------------------------------------------------------------------------------------------------------------------------------------------------------------------------------------------------------------------------------------------------------------------------------------------------------------------------------------------------------------------------------------------------------------------------------------------------------------------------------------------------------------------------------------------------------------------------------------------------------------------------------------------------------------------------------------------------------------------------------------------------------------------------------------------------------------------------------------------------------------------------------------------------------------------------------------------------------------------------------------------------------------------------------------------------------------------------------------------------------------------------------------------------------------------------------------------------------------------------------------------------------------------------------------------------------------------------------------------------------------------------------------------------------------------------------------------------------------------------------------------------------------------------------------------------------------------------------------------------------------------------------------------------------------------------------------------------------------------------------------------------------------------------------------------------------|-----------------------------------------------------------------------------------------------------------------------------------------------------------------------------------------------------------------------------------------------------------------------------------------------------------------------------------------------------------------------------------------------------------------------------------------------------------------------------------------------------------------------------------------------------------------------------------------------------------------------------------------------------------------------------------------------------------------------------------------------------------------------------------------------------------------------------------------------------------------------------------------------------------------------------------------------------------------------------------------------------------------------------------------------------------------------------------------------------------------------------------------------------------------------------------------------------------------------------------------------------------------------------------------------------------------------------------------------------------------------------------------------------------------------------------------------------------------------------------------------------------------------------------------------------------------------------------------------------------------------------------------------------------------------------------------------------------------------------------------------------------------------------------------------------------------------------------------------------------------------------------------------------------------------------------------|
| <p>Q8</p> | <p>The immune system identifies threats to the body, including cancer cells, through a complex process that involves recognition of certain molecules or signals. In a healthy immune response, the immune system is able to identify and destroy abnormal cells, including those that can become cancerous. Here's a basic outline of the process:</p> <ol style="list-style-type: none"> <li><b>Antigen presentation</b>: Cancer cells often express proteins or other molecules that are not present, or are present at much lower levels, on normal cells. These molecules, known as antigens, can be taken up by certain immune cells called antigen-presenting cells (APCs), such as dendritic cells. The APCs process these antigens and present pieces of them on their surface.</li> <li><b>Activation of T cells</b>: These antigen pieces are then recognized by T cells, a type of white blood cell. Each T cell has a unique receptor that allows it to recognize a specific antigen. When a T cell's receptor binds to its corresponding antigen on an APC, the T cell becomes activated.</li> <li><b>Attack on cancer cells</b>: Once activated, T cells can carry out a number of functions to fight cancer. Cytotoxic T cells can directly kill cancer cells by releasing toxic substances that damage the cancer cells. Helper T cells can stimulate other immune cells, including B cells that produce antibodies against the cancer antigens, and cytotoxic T cells, enhancing their ability to kill cancer cells.</li> </ol> <p>Unfortunately, cancer cells can employ various strategies to evade immune detection, such as reducing the expression of antigens, releasing immunosuppressive molecules, or taking advantage of immune checkpoint pathways to inhibit T cell responses. These evasion strategies are one of the reasons why cancer can be such a difficult disease to treat.</p> <p>Recent advancements in cancer treatment, like immunotherapies, are designed to enhance the immune system's ability to recognize and attack cancer cells. For instance, immune checkpoint inhibitors work by blocking signals that cancer cells use to evade immune responses, allowing T cells to recognize and attack the cancer cells more effectively.</p> | <p>The immune system is able to recognize cancer cells as abnormal through a complex process involving multiple types of cells and molecules. Here is a simplified overview:</p> <ol style="list-style-type: none"> <li><b>Tumor antigens</b>: Cancer cells often have abnormal proteins on their surface or can produce abnormal proteins. These are known as tumor antigens. They are different from the proteins found on normal cells and can mark cancer cells as targets for an immune response.</li> <li><b>Antigen presenting cells (APCs)</b>: Specialized immune cells, known as antigen presenting cells (like dendritic cells), can capture, process, and present these tumor antigens on their surface.</li> <li><b>Activation of T cells</b>: The antigen presenting cells interact with other immune cells known as T cells. The APCs present the tumor antigens to the T cells, which can activate the T cells and stimulate an immune response.</li> <li><b>Killing of cancer cells</b>: Once activated, certain types of T cells, known as cytotoxic T cells, have the ability to directly kill cancer cells. They recognize and bind to the tumor antigens on the surface of cancer cells and release substances that can kill the targeted cells.</li> </ol> <p>While the immune system has mechanisms to identify and destroy cancer cells, cancer can evolve ways to evade the immune response. For instance, some cancer cells reduce the number of antigens on their surface, making it harder for the immune system to recognize them. Some tumors can create a suppressive environment that inhibits immune responses.</p> <p>One strategy to enhance the immune response to cancer is to use immunotherapies. These can include checkpoint inhibitors, which block proteins that prevent the immune system from attacking cancer cells, and CAR-T cell therapies, which involve modifying a patient's T cells to better recognize and kill cancer cells.</p> | <p>The immune system can recognize cancer through a complex process that involves different cell types and signals. Here's a general outline of how it happens:</p> <ol style="list-style-type: none"> <li><b>Tumor Antigens</b>: Normal cells that turn into cancer cells undergo genetic mutations, leading to changes in their proteins. Some of these altered proteins, known as tumor antigens, can be presented on the surface of the cancer cells.</li> <li><b>Antigen-Presenting Cells (APCs)</b>: Immune cells called antigen-presenting cells (like dendritic cells) can capture tumor antigens and display fragments of them on their surface.</li> <li><b>T-Cell Activation</b>: Other immune cells, called T cells, can recognize these tumor antigen fragments displayed on APCs. This recognition process typically involves interaction between the T cell receptor (TCR) on the T cell and the antigen fragment on the APC. In addition to this, co-stimulatory signals are usually required for full T cell activation.</li> <li><b>Immune Response Against Cancer</b>: Once they are activated, T cells can multiply and carry out functions to eliminate cancer. Some T cells, known as cytotoxic T cells, can directly kill cancer cells. Other T cells can help coordinate the immune response.</li> <li><b>Immune Memory</b>: Some of the activated T cells can become memory T cells, which can quickly respond to the cancer if it returns in the future.</li> </ol> <p>Cancer cells, however, often develop strategies to evade immune detection and destruction. For example, they might reduce the presentation of tumor antigens, create an immunosuppressive environment, or exploit immune checkpoint pathways to inactivate T cells. The field of cancer immunotherapy involves developing treatments to overcome these evasion strategies and enhance the immune system's ability to fight cancer.</p> |
|-----------|----------------------------------------------------------------------------------------------------------------------------------------------------------------------------------------------------------------------------------------------------------------------------------------------------------------------------------------------------------------------------------------------------------------------------------------------------------------------------------------------------------------------------------------------------------------------------------------------------------------------------------------------------------------------------------------------------------------------------------------------------------------------------------------------------------------------------------------------------------------------------------------------------------------------------------------------------------------------------------------------------------------------------------------------------------------------------------------------------------------------------------------------------------------------------------------------------------------------------------------------------------------------------------------------------------------------------------------------------------------------------------------------------------------------------------------------------------------------------------------------------------------------------------------------------------------------------------------------------------------------------------------------------------------------------------------------------------------------------------------------------------------------------------------------------------------------------------------------------------------------------------------------------------------------------------------------------------------------------------------------------------------------------------------------------------------------------------------------------------------------------------------------------------------------------------------------------------------------------------------------------------------------------------------|-----------------------------------------------------------------------------------------------------------------------------------------------------------------------------------------------------------------------------------------------------------------------------------------------------------------------------------------------------------------------------------------------------------------------------------------------------------------------------------------------------------------------------------------------------------------------------------------------------------------------------------------------------------------------------------------------------------------------------------------------------------------------------------------------------------------------------------------------------------------------------------------------------------------------------------------------------------------------------------------------------------------------------------------------------------------------------------------------------------------------------------------------------------------------------------------------------------------------------------------------------------------------------------------------------------------------------------------------------------------------------------------------------------------------------------------------------------------------------------------------------------------------------------------------------------------------------------------------------------------------------------------------------------------------------------------------------------------------------------------------------------------------------------------------------------------------------------------------------------------------------------------------------------------------------------------------------------------------------------------|-----------------------------------------------------------------------------------------------------------------------------------------------------------------------------------------------------------------------------------------------------------------------------------------------------------------------------------------------------------------------------------------------------------------------------------------------------------------------------------------------------------------------------------------------------------------------------------------------------------------------------------------------------------------------------------------------------------------------------------------------------------------------------------------------------------------------------------------------------------------------------------------------------------------------------------------------------------------------------------------------------------------------------------------------------------------------------------------------------------------------------------------------------------------------------------------------------------------------------------------------------------------------------------------------------------------------------------------------------------------------------------------------------------------------------------------------------------------------------------------------------------------------------------------------------------------------------------------------------------------------------------------------------------------------------------------------------------------------------------------------------------------------------------------------------------------------------------------------------------------------------------------------------------------------------------------|

|                  |                                                                                                                                                                                                                                                                                                                                                                                                                                                                                                                                                                                                                                                                                                                                                                                                                                                                                                                                                                                                                                                                                                                                                                                                                                                                                                                                                                                                                                                                                                                                                                                                                                                                    |                                                                                                                                                                                                                                                                                                                                                                                                                                                                                                                                                                                                                                                                                                                                                                                                                                                                                                                                                                                                                                                                                                                                                                                                                                                                                                                                                                                                                                                                                                                                                                                                                                                                                                                                                                  |                                                                                                                                                                                                                                                                                                                                                                                                                                                                                                                                                                                                                                                                                                                                                                                                                                                                                                                                                                                                                                                                                                                                                                                                                                                                                                                                                                                                                                                                                                                                                                                                                                                                               |
|------------------|--------------------------------------------------------------------------------------------------------------------------------------------------------------------------------------------------------------------------------------------------------------------------------------------------------------------------------------------------------------------------------------------------------------------------------------------------------------------------------------------------------------------------------------------------------------------------------------------------------------------------------------------------------------------------------------------------------------------------------------------------------------------------------------------------------------------------------------------------------------------------------------------------------------------------------------------------------------------------------------------------------------------------------------------------------------------------------------------------------------------------------------------------------------------------------------------------------------------------------------------------------------------------------------------------------------------------------------------------------------------------------------------------------------------------------------------------------------------------------------------------------------------------------------------------------------------------------------------------------------------------------------------------------------------|------------------------------------------------------------------------------------------------------------------------------------------------------------------------------------------------------------------------------------------------------------------------------------------------------------------------------------------------------------------------------------------------------------------------------------------------------------------------------------------------------------------------------------------------------------------------------------------------------------------------------------------------------------------------------------------------------------------------------------------------------------------------------------------------------------------------------------------------------------------------------------------------------------------------------------------------------------------------------------------------------------------------------------------------------------------------------------------------------------------------------------------------------------------------------------------------------------------------------------------------------------------------------------------------------------------------------------------------------------------------------------------------------------------------------------------------------------------------------------------------------------------------------------------------------------------------------------------------------------------------------------------------------------------------------------------------------------------------------------------------------------------|-------------------------------------------------------------------------------------------------------------------------------------------------------------------------------------------------------------------------------------------------------------------------------------------------------------------------------------------------------------------------------------------------------------------------------------------------------------------------------------------------------------------------------------------------------------------------------------------------------------------------------------------------------------------------------------------------------------------------------------------------------------------------------------------------------------------------------------------------------------------------------------------------------------------------------------------------------------------------------------------------------------------------------------------------------------------------------------------------------------------------------------------------------------------------------------------------------------------------------------------------------------------------------------------------------------------------------------------------------------------------------------------------------------------------------------------------------------------------------------------------------------------------------------------------------------------------------------------------------------------------------------------------------------------------------|
| <p><b>Q9</b></p> | <p>Tremelimumab and durvalumab are both types of immunotherapies called immune checkpoint inhibitors. They help the immune system to recognize and attack cancer cells more effectively by disrupting certain signals that can prevent immune responses. However, they target different checkpoints:</p> <ol style="list-style-type: none"> <li><b>Tremelimumab</b> is an anti-CTLA-4 drug. CTLA-4 (cytotoxic T-lymphocyte-associated protein 4) is a protein found on T cells, a type of immune cell. When CTLA-4 binds to another protein called B7 on antigen-presenting cells, it sends a signal that suppresses the T cell's activity. Tremelimumab works by blocking the interaction between CTLA-4 and B7, helping to enhance T cell responses against cancer cells.</li> <li><b>Durvalumab</b> is an anti-PD-L1 drug. PD-L1 (programmed death-ligand 1) is a protein that can be found on the surface of some cells, including some cancer cells. When PD-L1 binds to another protein called PD-1 on T cells, it sends a signal that inhibits the T cell's activity. Durvalumab works by blocking the interaction between PD-L1 and PD-1, which can help to boost immune responses against cancer cells.</li> </ol> <p>Both tremelimumab and durvalumab can be used to treat certain types of cancers, and the choice between them can depend on a variety of factors, including the specific type and stage of cancer, the patient's overall health, and the presence of certain biomarkers. It's important for patients to discuss these treatment options with their healthcare team to decide which is most suitable for their specific situation.</p> | <p>Tremelimumab and durvalumab are both types of drugs known as immune checkpoint inhibitors, which are used in cancer treatment to enhance the body's immune response against cancer cells. However, they target different checkpoint proteins:</p> <ol style="list-style-type: none"> <li><b>Tremelimumab</b> is an anti-CTLA-4 monoclonal antibody. CTLA-4 (Cytotoxic T-Lymphocyte Associated protein 4) is a protein receptor that functions as an immune checkpoint and downregulates immune responses. It is found on the surface of T cells (a type of white blood cell), and when it's activated, it inhibits the immune response. Tremelimumab works by binding to CTLA-4 and blocking its activity, which can help boost the immune system's response against cancer cells.</li> <li><b>Durvalumab</b> is an anti-PD-L1 monoclonal antibody. PD-L1 (Programmed Death-Ligand 1) is a protein that, when bound to the PD-1 receptor on T cells, can inhibit an immune response. Some cancer cells can overexpress PD-L1, which allows them to evade attack by the immune system. Durvalumab works by binding to PD-L1, preventing it from interacting with PD-1 and thereby enhancing the immune response against cancer cells.</li> </ol> <p>In terms of their use in clinical practice, the choice between tremelimumab and durvalumab (or any other checkpoint inhibitor) would depend on factors such as the type of cancer, the patient's overall health, and the specific genetic characteristics of the tumor. It's important to note that these drugs, while they can be very effective, can also have serious side effects due to their impact on the immune system, and their use needs to be carefully managed by the treating physician.</p> | <p>Tremelimumab and durvalumab are both monoclonal antibodies used as immunotherapies in the treatment of certain types of cancer, but they target different immune checkpoint proteins.</p> <ol style="list-style-type: none"> <li><b>Tremelimumab</b> targets cytotoxic T-lymphocyte-associated protein 4 (CTLA-4), a protein receptor that downregulates immune responses. CTLA-4 is found on the surface of T cells (a type of white blood cell) and functions to inhibit the immune response. Tremelimumab works by blocking the activity of CTLA-4, which can help to enhance the immune response against cancer cells.</li> <li><b>Durvalumab</b> targets programmed death-ligand 1 (PD-L1), a protein that can suppress the immune system's ability to attack cancer cells. PD-L1, found on the surface of some cancer cells, binds to the PD-1 receptor on T cells and inhibits their ability to kill the cancer cells. By blocking the interaction between PD-L1 and PD-1, durvalumab can enhance the immune response against cancer cells.</li> </ol> <p>In summary, while both drugs work by removing the brakes on the immune system to boost its ability to fight cancer, they do so by targeting different checkpoint proteins. The choice of whether to use tremelimumab, durvalumab, or another immunotherapy drug in treatment would depend on various factors, including the type and stage of cancer, the overall health of the patient, and the specific genetic characteristics of the tumor. As with any cancer treatment, the potential benefits must be weighed against potential side effects, which can include immune-related adverse events.</p> |
|------------------|--------------------------------------------------------------------------------------------------------------------------------------------------------------------------------------------------------------------------------------------------------------------------------------------------------------------------------------------------------------------------------------------------------------------------------------------------------------------------------------------------------------------------------------------------------------------------------------------------------------------------------------------------------------------------------------------------------------------------------------------------------------------------------------------------------------------------------------------------------------------------------------------------------------------------------------------------------------------------------------------------------------------------------------------------------------------------------------------------------------------------------------------------------------------------------------------------------------------------------------------------------------------------------------------------------------------------------------------------------------------------------------------------------------------------------------------------------------------------------------------------------------------------------------------------------------------------------------------------------------------------------------------------------------------|------------------------------------------------------------------------------------------------------------------------------------------------------------------------------------------------------------------------------------------------------------------------------------------------------------------------------------------------------------------------------------------------------------------------------------------------------------------------------------------------------------------------------------------------------------------------------------------------------------------------------------------------------------------------------------------------------------------------------------------------------------------------------------------------------------------------------------------------------------------------------------------------------------------------------------------------------------------------------------------------------------------------------------------------------------------------------------------------------------------------------------------------------------------------------------------------------------------------------------------------------------------------------------------------------------------------------------------------------------------------------------------------------------------------------------------------------------------------------------------------------------------------------------------------------------------------------------------------------------------------------------------------------------------------------------------------------------------------------------------------------------------|-------------------------------------------------------------------------------------------------------------------------------------------------------------------------------------------------------------------------------------------------------------------------------------------------------------------------------------------------------------------------------------------------------------------------------------------------------------------------------------------------------------------------------------------------------------------------------------------------------------------------------------------------------------------------------------------------------------------------------------------------------------------------------------------------------------------------------------------------------------------------------------------------------------------------------------------------------------------------------------------------------------------------------------------------------------------------------------------------------------------------------------------------------------------------------------------------------------------------------------------------------------------------------------------------------------------------------------------------------------------------------------------------------------------------------------------------------------------------------------------------------------------------------------------------------------------------------------------------------------------------------------------------------------------------------|

|                   |                                                                                                                                                                                                                                                                                                                                                                                                                                                                                                                                                                                                                                                                                                                                                                                                                                                                                                                                                                                                                                                                                                                                                                                                                                                                                                                                                                                                                                                                                                                                                                                                                                                                                                                                                                                                                                                                                                                                                                                                                                                                                                                                                                                                                                                      |                                                                                                                                                                                                                                                                                                                                                                                                                                                                                                                                                                                                                                                                                                                                                                                                                                                                                                                                                                                                                                                                                                                                                                                                                                                                                                                                                                                                                                                                                                                                                                                                                                                                                                                                                                                                                                                                                                                                                                                                                                                                                                                                                           |                                                                                                                                                                                                                                                                                                                                                                                                                                                                                                                                                                                                                                                                                                                                                                                                                                                                                                                                                                                                                                                                                                                                                                                                                                                                                                                                                                                                                                                                                                                                                                                                                                                                                                                                                                                                                                                                                                                                                                                                                                                                                                                                    |
|-------------------|------------------------------------------------------------------------------------------------------------------------------------------------------------------------------------------------------------------------------------------------------------------------------------------------------------------------------------------------------------------------------------------------------------------------------------------------------------------------------------------------------------------------------------------------------------------------------------------------------------------------------------------------------------------------------------------------------------------------------------------------------------------------------------------------------------------------------------------------------------------------------------------------------------------------------------------------------------------------------------------------------------------------------------------------------------------------------------------------------------------------------------------------------------------------------------------------------------------------------------------------------------------------------------------------------------------------------------------------------------------------------------------------------------------------------------------------------------------------------------------------------------------------------------------------------------------------------------------------------------------------------------------------------------------------------------------------------------------------------------------------------------------------------------------------------------------------------------------------------------------------------------------------------------------------------------------------------------------------------------------------------------------------------------------------------------------------------------------------------------------------------------------------------------------------------------------------------------------------------------------------------|-----------------------------------------------------------------------------------------------------------------------------------------------------------------------------------------------------------------------------------------------------------------------------------------------------------------------------------------------------------------------------------------------------------------------------------------------------------------------------------------------------------------------------------------------------------------------------------------------------------------------------------------------------------------------------------------------------------------------------------------------------------------------------------------------------------------------------------------------------------------------------------------------------------------------------------------------------------------------------------------------------------------------------------------------------------------------------------------------------------------------------------------------------------------------------------------------------------------------------------------------------------------------------------------------------------------------------------------------------------------------------------------------------------------------------------------------------------------------------------------------------------------------------------------------------------------------------------------------------------------------------------------------------------------------------------------------------------------------------------------------------------------------------------------------------------------------------------------------------------------------------------------------------------------------------------------------------------------------------------------------------------------------------------------------------------------------------------------------------------------------------------------------------------|------------------------------------------------------------------------------------------------------------------------------------------------------------------------------------------------------------------------------------------------------------------------------------------------------------------------------------------------------------------------------------------------------------------------------------------------------------------------------------------------------------------------------------------------------------------------------------------------------------------------------------------------------------------------------------------------------------------------------------------------------------------------------------------------------------------------------------------------------------------------------------------------------------------------------------------------------------------------------------------------------------------------------------------------------------------------------------------------------------------------------------------------------------------------------------------------------------------------------------------------------------------------------------------------------------------------------------------------------------------------------------------------------------------------------------------------------------------------------------------------------------------------------------------------------------------------------------------------------------------------------------------------------------------------------------------------------------------------------------------------------------------------------------------------------------------------------------------------------------------------------------------------------------------------------------------------------------------------------------------------------------------------------------------------------------------------------------------------------------------------------------|
| <p><b>Q10</b></p> | <p>Tumor-infiltrating lymphocyte (TIL) therapy is a type of adoptive cell transfer immunotherapy used to treat cancer, particularly melanoma, though it's being explored for use in other types of cancers as well.</p> <p>TILs are white blood cells that have left the bloodstream and migrated into a tumor. Their presence is often a sign that the immune system is attempting to attack the cancer. Some tumors contain T cells that have recognized the cancer and are attempting to destroy it, but these T cells often become exhausted or are otherwise prevented from killing the cancer cells.</p> <p>The process of TIL therapy involves:</p> <ol style="list-style-type: none"> <li><b>Harvesting</b>: A piece of the patient's tumor is removed in a surgical procedure. This tumor sample is taken to the lab, where T cells (the tumor-infiltrating lymphocytes) are isolated.</li> <li><b>Expansion</b>: The T cells are then grown in the laboratory under conditions that activate them and stimulate their proliferation. This process generates a large number of T cells (potentially in the billions).</li> <li><b>Infusion</b>: After this expansion phase, the patient typically undergoes a conditioning regimen, which often includes chemotherapy and sometimes radiation therapy, to deplete existing immune cells and make room for the new ones. The expanded T cells are then infused back into the patient's body.</li> <li><b>Support</b>: After infusion, the patients are usually given a course of interleukin-2 (IL-2), a type of cytokine that helps T cells grow and proliferate. The idea is that the T cells, now in larger numbers and no longer inhibited by the suppressive tumor environment, will find and destroy the cancer cells throughout the body. It's important to note that while TIL therapy has shown promise in clinical trials, particularly for melanoma, it's a complex and personalized treatment approach that requires specialized facilities and expertise. The treatment can also have significant side effects, and it's currently not suitable or effective for all patients or all types of cancer. Research is ongoing to improve TIL therapy and expand its use.</li> </ol> | <p>Tumor-infiltrating lymphocyte (TIL) therapy is a form of cancer immunotherapy that leverages the body's own immune system to fight cancer. It's based on the observation that in some cancers, certain areas of the tumor are infiltrated by T cells (a type of white blood cell), suggesting that the immune system is trying to combat the cancer. However, these T cells often are not able to effectively eliminate the cancer cells.</p> <p>Here's how TIL therapy works:</p> <ol style="list-style-type: none"> <li><b>Isolation</b>: A sample of the patient's tumor is removed during surgery. This tumor sample contains T cells (the tumor-infiltrating lymphocytes) that have already recognized the cancer as a threat.</li> <li><b>Expansion</b>: In the laboratory, these T cells are separated from the tumor and stimulated with substances (such as interleukin-2) to grow and multiply. This process can take several weeks, but it results in a large number of T cells that are potentially capable of attacking the cancer.</li> <li><b>Reinfusion</b>: The patient is typically given a treatment to reduce their existing immune cells, creating "space" for the new T cells. Then, the grown T cells are infused back into the patient's body.</li> <li><b>Action</b>: The idea is that these T cells, now present in large numbers, can find and kill cancer cells throughout the body.</li> </ol> <p>The effectiveness of TIL therapy can vary widely, as it depends on several factors, including the ability to grow T cells from the patient's tumor and the patient's overall health status. TIL therapy has shown promising results in clinical trials, particularly for melanoma, but it's also being explored for other types of cancer.</p> <p>Despite the potential benefits, it's worth noting that TIL therapy can also have significant side effects, including severe or even life-threatening reactions to the high-dose interleukin-2 used to expand the T cells. It's also a very personalized treatment that requires substantial resources, including specialized laboratories and clinical expertise.</p> | <p>Tumor-infiltrating lymphocyte (TIL) therapy is a type of immunotherapy used in cancer treatment. It works by harnessing the power of a patient's own immune system to attack cancer cells.</p> <p>Here's a step-by-step explanation of how TIL therapy works:</p> <ol style="list-style-type: none"> <li><b>Harvesting</b>: A surgeon removes a small portion of the patient's tumor. This sample contains T cells (a type of white blood cell), which are the "tumor-infiltrating lymphocytes." These T cells have already recognized the cancer as an enemy, but there may not be enough of them to overcome the cancer on their own, or they may be exhausted or suppressed by the tumor's defense mechanisms.</li> <li><b>Expansion</b>: The T cells from the tumor sample are then separated and grown in the lab, creating billions of these cells over a period of weeks. This process is known as "expanding" the T cells. During this time, the T cells are also activated, making them more effective at fighting cancer.</li> <li><b>Infusion</b>: The patient is prepared for the return of the T cells, often with chemotherapy or radiation therapy to reduce their existing immune cells and make room for the new, active T cells. The expanded T cells are then infused back into the patient's bloodstream.</li> <li><b>Attack</b>: Once inside the patient's body, the T cells seek out and destroy the cancer cells. They can recognize and attack the cancer because they originated from T cells that had already identified the cancer as a threat.</li> </ol> <p>TIL therapy has shown promise in treating certain types of cancer, including melanoma, cervical cancer, and some forms of gastrointestinal cancer. However, this approach requires significant resources, including highly specialized laboratory facilities and teams with expertise in this type of treatment. In addition, like all treatments, it can have side effects and does not work for everyone. Ongoing research aims to further improve the effectiveness of TIL therapy and expand its use to other types of cancer.</p> |
|-------------------|------------------------------------------------------------------------------------------------------------------------------------------------------------------------------------------------------------------------------------------------------------------------------------------------------------------------------------------------------------------------------------------------------------------------------------------------------------------------------------------------------------------------------------------------------------------------------------------------------------------------------------------------------------------------------------------------------------------------------------------------------------------------------------------------------------------------------------------------------------------------------------------------------------------------------------------------------------------------------------------------------------------------------------------------------------------------------------------------------------------------------------------------------------------------------------------------------------------------------------------------------------------------------------------------------------------------------------------------------------------------------------------------------------------------------------------------------------------------------------------------------------------------------------------------------------------------------------------------------------------------------------------------------------------------------------------------------------------------------------------------------------------------------------------------------------------------------------------------------------------------------------------------------------------------------------------------------------------------------------------------------------------------------------------------------------------------------------------------------------------------------------------------------------------------------------------------------------------------------------------------------|-----------------------------------------------------------------------------------------------------------------------------------------------------------------------------------------------------------------------------------------------------------------------------------------------------------------------------------------------------------------------------------------------------------------------------------------------------------------------------------------------------------------------------------------------------------------------------------------------------------------------------------------------------------------------------------------------------------------------------------------------------------------------------------------------------------------------------------------------------------------------------------------------------------------------------------------------------------------------------------------------------------------------------------------------------------------------------------------------------------------------------------------------------------------------------------------------------------------------------------------------------------------------------------------------------------------------------------------------------------------------------------------------------------------------------------------------------------------------------------------------------------------------------------------------------------------------------------------------------------------------------------------------------------------------------------------------------------------------------------------------------------------------------------------------------------------------------------------------------------------------------------------------------------------------------------------------------------------------------------------------------------------------------------------------------------------------------------------------------------------------------------------------------------|------------------------------------------------------------------------------------------------------------------------------------------------------------------------------------------------------------------------------------------------------------------------------------------------------------------------------------------------------------------------------------------------------------------------------------------------------------------------------------------------------------------------------------------------------------------------------------------------------------------------------------------------------------------------------------------------------------------------------------------------------------------------------------------------------------------------------------------------------------------------------------------------------------------------------------------------------------------------------------------------------------------------------------------------------------------------------------------------------------------------------------------------------------------------------------------------------------------------------------------------------------------------------------------------------------------------------------------------------------------------------------------------------------------------------------------------------------------------------------------------------------------------------------------------------------------------------------------------------------------------------------------------------------------------------------------------------------------------------------------------------------------------------------------------------------------------------------------------------------------------------------------------------------------------------------------------------------------------------------------------------------------------------------------------------------------------------------------------------------------------------------|

|            |                                                                                                                                                                                                                                                                                                                                                                                                                                                                                                                                                                                                                                                                                                                                                                                                                                                                                                                                                                                                                                                                                                                                                                                                                                                                                                                                                                                                                                                                                                                                                                                                                                                                                                                                                                                                                                                                                                                                                                                                                                                                                                                                                                                                                                                                  |                                                                                                                                                                                                                                                                                                                                                                                                                                                                                                                                                                                                                                                                                                                                                                                                                                                                                                                                                                                                                                                                                                                                                                                                                                                                                                                                                                                                                                                                                                                                                                                                                                                                                                                                                                                                                                                                                                                                                                                                                                                                            |                                                                                                                                                                                                                                                                                                                                                                                                                                                                                                                                                                                                                                                                                                                                                                                                                                                                                                                                                                                                                                                                                                                                                                                                                                                                                                                                                                                                                                                                                                                                                                                                                                                                                                                                                                                                                                                                                                                                                                                                                                                                                                                                                                                                                                                                                                                               |
|------------|------------------------------------------------------------------------------------------------------------------------------------------------------------------------------------------------------------------------------------------------------------------------------------------------------------------------------------------------------------------------------------------------------------------------------------------------------------------------------------------------------------------------------------------------------------------------------------------------------------------------------------------------------------------------------------------------------------------------------------------------------------------------------------------------------------------------------------------------------------------------------------------------------------------------------------------------------------------------------------------------------------------------------------------------------------------------------------------------------------------------------------------------------------------------------------------------------------------------------------------------------------------------------------------------------------------------------------------------------------------------------------------------------------------------------------------------------------------------------------------------------------------------------------------------------------------------------------------------------------------------------------------------------------------------------------------------------------------------------------------------------------------------------------------------------------------------------------------------------------------------------------------------------------------------------------------------------------------------------------------------------------------------------------------------------------------------------------------------------------------------------------------------------------------------------------------------------------------------------------------------------------------|----------------------------------------------------------------------------------------------------------------------------------------------------------------------------------------------------------------------------------------------------------------------------------------------------------------------------------------------------------------------------------------------------------------------------------------------------------------------------------------------------------------------------------------------------------------------------------------------------------------------------------------------------------------------------------------------------------------------------------------------------------------------------------------------------------------------------------------------------------------------------------------------------------------------------------------------------------------------------------------------------------------------------------------------------------------------------------------------------------------------------------------------------------------------------------------------------------------------------------------------------------------------------------------------------------------------------------------------------------------------------------------------------------------------------------------------------------------------------------------------------------------------------------------------------------------------------------------------------------------------------------------------------------------------------------------------------------------------------------------------------------------------------------------------------------------------------------------------------------------------------------------------------------------------------------------------------------------------------------------------------------------------------------------------------------------------------|-------------------------------------------------------------------------------------------------------------------------------------------------------------------------------------------------------------------------------------------------------------------------------------------------------------------------------------------------------------------------------------------------------------------------------------------------------------------------------------------------------------------------------------------------------------------------------------------------------------------------------------------------------------------------------------------------------------------------------------------------------------------------------------------------------------------------------------------------------------------------------------------------------------------------------------------------------------------------------------------------------------------------------------------------------------------------------------------------------------------------------------------------------------------------------------------------------------------------------------------------------------------------------------------------------------------------------------------------------------------------------------------------------------------------------------------------------------------------------------------------------------------------------------------------------------------------------------------------------------------------------------------------------------------------------------------------------------------------------------------------------------------------------------------------------------------------------------------------------------------------------------------------------------------------------------------------------------------------------------------------------------------------------------------------------------------------------------------------------------------------------------------------------------------------------------------------------------------------------------------------------------------------------------------------------------------------------|
| <p>Q11</p> | <p>Yes, the immune system can reach all parts of the body. This widespread reach is one of the unique aspects of the immune system that makes it so effective at protecting against disease.</p> <p>The immune system consists of a vast network of cells, tissues, and organs that work together to defend the body against harmful invaders such as bacteria, viruses, and cancer cells. Some key components include:</p> <ol style="list-style-type: none"> <li><b>White Blood Cells</b>: These cells circulate throughout the body in the bloodstream and lymphatic system. There are several types of white blood cells, including T cells and B cells, which can recognize and respond to specific pathogens, and cells like neutrophils and macrophages, which provide a more general first line of defense.</li> <li><b>Lymphatic System</b>: This network of vessels and nodes carries a fluid called lymph throughout the body. The lymphatic system helps to transport immune cells and also filters out foreign substances and disease-causing organisms.</li> <li><b>Spleen</b>: The spleen helps filter the blood and removes old or damaged red blood cells. It also produces white blood cells and antibodies.</li> <li><b>Bone Marrow</b>: This is where all blood cells, including immune cells, are produced.</li> <li><b>Thymus</b>: This organ is where T cells mature and learn to distinguish between the body's own cells and foreign substances.</li> <li><b>Mucosal Surfaces</b>: Areas like the skin and the linings of the respiratory and digestive tracts also play important roles in the immune response. They form physical barriers against pathogens and host immune cells and molecules that provide immediate defense.</li> </ol> <p>Because these components are interconnected and distributed throughout the body, the immune system can respond to threats in virtually any location. However, certain areas, like the central nervous system (brain and spinal cord), have traditionally been considered "immune privileged" because the immune response within these areas is tightly regulated to prevent potential damage. Nonetheless, immune cells can and do access these areas under certain circumstances.</p> | <p>Yes, the immune system can reach almost all parts of the body. The immune system is a complex network of cells, tissues, and organs that work together to defend the body against harmful invaders, such as bacteria, viruses, and cancer cells. Key components of the immune system include:</p> <ol style="list-style-type: none"> <li><b>White Blood Cells (Leukocytes)</b>: These are the key players in the immune system, identifying and eliminating pathogens that enter the body. They circulate in the body in blood vessels and lymphatic vessels, which allows them to reach nearly every region of the body.</li> <li><b>Lymphatic System</b>: This system includes a network of lymphatic vessels and lymph nodes throughout the body. The lymphatic system transports a fluid called lymph, which contains white blood cells that help fight infections. The lymphatic vessels reach various parts of the body, similar to blood vessels.</li> <li><b>Bone Marrow</b>: This soft tissue inside bones is where most immune system cells are produced. From the bone marrow, they move into the bloodstream to circulate throughout the body.</li> <li><b>Spleen</b>: The spleen filters the blood and helps the body identify and destroy bacteria and viruses.</li> <li><b>Thymus</b>: This small organ located behind the breastbone is where T cells (a type of white blood cell) mature before they can be deployed to fight off disease.</li> <li><b>Mucosal Tissue</b>: This tissue, found in areas such as the respiratory, gastrointestinal, and urogenital tracts, contains immune cells and helps protect these entry points from pathogens.</li> </ol> <p>While these immune components can reach nearly all parts of the body, certain areas, such as the brain, are considered "immune-privileged", meaning the immune response within these areas is tightly controlled and limited to prevent potential damage. However, immune cells can access these areas under certain circumstances, such as during an infection or inflammation.</p> | <p>Yes, the immune system can reach all parts of the body. This widespread reach is essential for its role in protecting the body from harmful substances and pathogens. The immune system includes a number of different cell types, organs, and structures that are distributed throughout the body. These include:</p> <ol style="list-style-type: none"> <li><b>White Blood Cells</b>: These cells, also known as leukocytes, circulate in the blood and lymphatic system and are crucial for immune defense. They include various types of cells like B cells, T cells, macrophages, and neutrophils that can respond to infections or diseases in different parts of the body.</li> <li><b>Lymphatic System</b>: This network of tissues and organs helps to transport white blood cells and other immune cells throughout the body. The lymphatic system includes lymph nodes, which filter lymph (a fluid that contains white blood cells) and can trigger an immune response when they detect foreign substances.</li> <li><b>Spleen</b>: The spleen helps to filter the blood, removing old or damaged cells and can also mount an immune response when necessary.</li> <li><b>Bone Marrow</b>: This is the site where all blood cells, including white blood cells, are produced before they enter the bloodstream and circulate throughout the body.</li> <li><b>Thymus</b>: This organ is where T cells mature before they are released into the bloodstream.</li> <li><b>Mucosal Surfaces</b>: These include areas like the skin, gastrointestinal tract, respiratory tract, and urogenital tract. These surfaces serve as the body's first line of defense, helping to prevent pathogens from entering the body. They also contain immune cells that can respond to pathogens that manage to breach these barriers.</li> </ol> <p>In this way, the immune system can reach and respond to problems in nearly any part of the body. However, it's worth noting that there are some areas of the body, like the central nervous system (CNS), that are somewhat "privileged" sites where the immune response is carefully regulated to prevent potential damage from inflammation. This does not mean immune cells cannot reach these sites, but rather their activity may be more controlled or restricted.</p> |
|------------|------------------------------------------------------------------------------------------------------------------------------------------------------------------------------------------------------------------------------------------------------------------------------------------------------------------------------------------------------------------------------------------------------------------------------------------------------------------------------------------------------------------------------------------------------------------------------------------------------------------------------------------------------------------------------------------------------------------------------------------------------------------------------------------------------------------------------------------------------------------------------------------------------------------------------------------------------------------------------------------------------------------------------------------------------------------------------------------------------------------------------------------------------------------------------------------------------------------------------------------------------------------------------------------------------------------------------------------------------------------------------------------------------------------------------------------------------------------------------------------------------------------------------------------------------------------------------------------------------------------------------------------------------------------------------------------------------------------------------------------------------------------------------------------------------------------------------------------------------------------------------------------------------------------------------------------------------------------------------------------------------------------------------------------------------------------------------------------------------------------------------------------------------------------------------------------------------------------------------------------------------------------|----------------------------------------------------------------------------------------------------------------------------------------------------------------------------------------------------------------------------------------------------------------------------------------------------------------------------------------------------------------------------------------------------------------------------------------------------------------------------------------------------------------------------------------------------------------------------------------------------------------------------------------------------------------------------------------------------------------------------------------------------------------------------------------------------------------------------------------------------------------------------------------------------------------------------------------------------------------------------------------------------------------------------------------------------------------------------------------------------------------------------------------------------------------------------------------------------------------------------------------------------------------------------------------------------------------------------------------------------------------------------------------------------------------------------------------------------------------------------------------------------------------------------------------------------------------------------------------------------------------------------------------------------------------------------------------------------------------------------------------------------------------------------------------------------------------------------------------------------------------------------------------------------------------------------------------------------------------------------------------------------------------------------------------------------------------------------|-------------------------------------------------------------------------------------------------------------------------------------------------------------------------------------------------------------------------------------------------------------------------------------------------------------------------------------------------------------------------------------------------------------------------------------------------------------------------------------------------------------------------------------------------------------------------------------------------------------------------------------------------------------------------------------------------------------------------------------------------------------------------------------------------------------------------------------------------------------------------------------------------------------------------------------------------------------------------------------------------------------------------------------------------------------------------------------------------------------------------------------------------------------------------------------------------------------------------------------------------------------------------------------------------------------------------------------------------------------------------------------------------------------------------------------------------------------------------------------------------------------------------------------------------------------------------------------------------------------------------------------------------------------------------------------------------------------------------------------------------------------------------------------------------------------------------------------------------------------------------------------------------------------------------------------------------------------------------------------------------------------------------------------------------------------------------------------------------------------------------------------------------------------------------------------------------------------------------------------------------------------------------------------------------------------------------------|



|            |                                                                                                                                                                                                                                                                                                                                                                                                                                                                                                                                                                                                                                                                                                                                                                                                                                                                                                                                                                                                                                                                                                                                                                                                                                                                                                                                                                                                                                                                                                                                                                                                                                                                                                                                                                                                                                                                                                                                                                                                                                                                                                                                                                                                                                                                                                                                                                                                                                                             |                                                                                                                                                                                                                                                                                                                                                                                                                                                                                                                                                                                                                                                                                                                                                                                                                                                                                                                                                                                                                                                                                                                                                                                                                                                                                                                                                                                                                                                                                                                                                                                                                                                                                                                                                                                                                                                                                                                                                                                                                                                                                                                                                                                                                                                                                                                                                                                      |                                                                                                                                                                                                                                                                                                                                                                                                                                                                                                                                                                                                                                                                                                                                                                                                                                                                                                                                                                                                                                                                                                                                                                                                                                                                                                                                                                                                                                                                                                                                                                                                                                                                                                                                                                                                                                                                                                                                                                                                                                                                                    |
|------------|-------------------------------------------------------------------------------------------------------------------------------------------------------------------------------------------------------------------------------------------------------------------------------------------------------------------------------------------------------------------------------------------------------------------------------------------------------------------------------------------------------------------------------------------------------------------------------------------------------------------------------------------------------------------------------------------------------------------------------------------------------------------------------------------------------------------------------------------------------------------------------------------------------------------------------------------------------------------------------------------------------------------------------------------------------------------------------------------------------------------------------------------------------------------------------------------------------------------------------------------------------------------------------------------------------------------------------------------------------------------------------------------------------------------------------------------------------------------------------------------------------------------------------------------------------------------------------------------------------------------------------------------------------------------------------------------------------------------------------------------------------------------------------------------------------------------------------------------------------------------------------------------------------------------------------------------------------------------------------------------------------------------------------------------------------------------------------------------------------------------------------------------------------------------------------------------------------------------------------------------------------------------------------------------------------------------------------------------------------------------------------------------------------------------------------------------------------------|--------------------------------------------------------------------------------------------------------------------------------------------------------------------------------------------------------------------------------------------------------------------------------------------------------------------------------------------------------------------------------------------------------------------------------------------------------------------------------------------------------------------------------------------------------------------------------------------------------------------------------------------------------------------------------------------------------------------------------------------------------------------------------------------------------------------------------------------------------------------------------------------------------------------------------------------------------------------------------------------------------------------------------------------------------------------------------------------------------------------------------------------------------------------------------------------------------------------------------------------------------------------------------------------------------------------------------------------------------------------------------------------------------------------------------------------------------------------------------------------------------------------------------------------------------------------------------------------------------------------------------------------------------------------------------------------------------------------------------------------------------------------------------------------------------------------------------------------------------------------------------------------------------------------------------------------------------------------------------------------------------------------------------------------------------------------------------------------------------------------------------------------------------------------------------------------------------------------------------------------------------------------------------------------------------------------------------------------------------------------------------------|------------------------------------------------------------------------------------------------------------------------------------------------------------------------------------------------------------------------------------------------------------------------------------------------------------------------------------------------------------------------------------------------------------------------------------------------------------------------------------------------------------------------------------------------------------------------------------------------------------------------------------------------------------------------------------------------------------------------------------------------------------------------------------------------------------------------------------------------------------------------------------------------------------------------------------------------------------------------------------------------------------------------------------------------------------------------------------------------------------------------------------------------------------------------------------------------------------------------------------------------------------------------------------------------------------------------------------------------------------------------------------------------------------------------------------------------------------------------------------------------------------------------------------------------------------------------------------------------------------------------------------------------------------------------------------------------------------------------------------------------------------------------------------------------------------------------------------------------------------------------------------------------------------------------------------------------------------------------------------------------------------------------------------------------------------------------------------|
| <p>Q12</p> | <p>Immunotherapy, chemotherapy, and radiotherapy are all strategies used to combat cancer, and they work in different ways. Combining these treatments can sometimes provide better outcomes than using any single treatment alone.</p> <p>Here are some reasons why these therapies might be combined:</p> <ol style="list-style-type: none"> <li><b>Improved Efficacy</b>: Some studies have shown that using immunotherapy in combination with chemotherapy or radiotherapy can lead to better outcomes, including higher response rates and longer survival, compared to using these therapies individually. The treatments can have synergistic effects, meaning the combined effect is greater than the sum of their individual effects.</li> <li><b>Different Mechanisms of Action</b>: Chemotherapy and radiotherapy work by directly killing cancer cells or preventing them from dividing, while immunotherapy works by boosting or directing the immune system to fight cancer. This difference in mechanisms of action means that they can complement each other's effects.</li> <li><b>Overcoming Resistance</b>: Sometimes, cancers become resistant to one type of treatment. Using different types of treatments together can reduce the chance of resistance developing, as the cancer would have to simultaneously develop multiple mechanisms of resistance.</li> <li><b>Induction of Immune Response</b>: Both chemotherapy and radiotherapy can induce an immune response. They can cause the release of antigens (molecules recognized by the immune system) from dying cancer cells, which can be captured by immune cells and trigger a stronger immune response. Some forms of chemotherapy can also reduce the number of regulatory T cells (which suppress immune responses) in the tumor environment, thereby enhancing the effects of immunotherapy.</li> <li><b>Addressing Heterogeneity</b>: Tumors are often heterogeneous, meaning they consist of different types of cancer cells. Combining treatments increases the likelihood of being able to effectively target and kill all the different types of cancer cells within a tumor.</li> </ol> <p>While combining treatments can be beneficial, it's important to note that it can also increase the risk of side effects. The combination of treatments needs to be carefully managed and tailored to the individual patient's needs and overall health condition.</p> | <p>Combining immunotherapy with chemotherapy or radiotherapy, also known as combinatorial therapy, is often done to improve treatment effectiveness in cancer. Here's why:</p> <ol style="list-style-type: none"> <li><b>Enhanced Effectiveness</b>: The combined effect of these therapies is often greater than their individual effects. For instance, chemotherapy or radiotherapy can kill cancer cells and in the process, release new antigens (proteins that the immune system recognizes as foreign). These new antigens can then be targets for immunotherapy, enhancing the immune system's ability to recognize and kill the cancer cells.</li> <li><b>Different Modes of Action</b>: Chemotherapy and radiotherapy primarily work by damaging the DNA of cancer cells, which interferes with their ability to divide and grow. Immunotherapy, on the other hand, works by enhancing or enabling the body's immune system to fight cancer. These therapies can therefore complement each other, attacking the cancer in different ways.</li> <li><b>Overcoming Resistance</b>: Tumors can develop resistance to a single mode of therapy over time. Using different treatments simultaneously can help to overcome or prevent such resistance, as each treatment type targets the cancer in a different way.</li> <li><b>Immune Modulation</b>: Some chemotherapy drugs can help to modulate the immune system, making immunotherapy more effective. For instance, certain chemotherapeutic agents can affect the tumor microenvironment, reducing the number of immunosuppressive cells and increasing the number of immune-activating cells, thereby helping immunotherapy drugs to work better.</li> <li><b>Sequential Treatment</b>: In some cases, chemotherapy or radiotherapy is used first to shrink the tumor, followed by immunotherapy to clear any remaining cells and help prevent recurrence.</li> </ol> <p>It's important to note, however, that while combining therapies can increase effectiveness, it can also increase the risk of side effects. The choice to use combined therapy depends on many factors, including the type and stage of cancer, the patient's overall health, and the specific side effect profiles of the drugs being used. As such, it's a decision made with careful consideration by the oncology team and the patient.</p> | <p>Combining immunotherapy with chemotherapy or radiotherapy, often referred to as combination therapy, is a strategy used in cancer treatment to increase the effectiveness of the treatment. Here are some reasons why these therapies might be combined:</p> <ol style="list-style-type: none"> <li><b>Enhanced Effectiveness</b>: Each of these treatment methods works in a different way. Chemotherapy and radiotherapy kill cancer cells directly, while immunotherapy helps the immune system recognize and destroy cancer cells. Using them in combination can increase the overall effectiveness of the treatment.</li> <li><b>Induction of Immune Response</b>: Chemotherapy and radiotherapy can sometimes enhance the body's immune response. They can cause cancer cells to die in a way that exposes new targets for the immune system to recognize, which can then be exploited by immunotherapy.</li> <li><b>Overcoming Resistance</b>: Cancer cells can sometimes become resistant to one type of therapy. By using multiple types of therapy, it's harder for cancer cells to develop resistance to the treatment.</li> <li><b>Targeting Different Aspects of Cancer</b>: Combining treatments allows for the targeting of different aspects of the cancer. For instance, chemotherapy or radiotherapy might be particularly effective at targeting fast-growing cancer cells, while immunotherapy might be more effective at targeting slow-growing or dormant cells.</li> <li><b>Sequential Treatment</b>: In some situations, one treatment might be used to make the cancer more susceptible to a subsequent treatment. For instance, chemotherapy or radiotherapy might be used to shrink a tumor, making it easier for immunotherapy to target and destroy the remaining cancer cells.</li> </ol> <p>While combination therapy can offer benefits, it also carries the risk of increased side effects and toxicities. Therefore, careful consideration and discussion with the healthcare team is needed to balance the potential benefits and risks.</p> |
|------------|-------------------------------------------------------------------------------------------------------------------------------------------------------------------------------------------------------------------------------------------------------------------------------------------------------------------------------------------------------------------------------------------------------------------------------------------------------------------------------------------------------------------------------------------------------------------------------------------------------------------------------------------------------------------------------------------------------------------------------------------------------------------------------------------------------------------------------------------------------------------------------------------------------------------------------------------------------------------------------------------------------------------------------------------------------------------------------------------------------------------------------------------------------------------------------------------------------------------------------------------------------------------------------------------------------------------------------------------------------------------------------------------------------------------------------------------------------------------------------------------------------------------------------------------------------------------------------------------------------------------------------------------------------------------------------------------------------------------------------------------------------------------------------------------------------------------------------------------------------------------------------------------------------------------------------------------------------------------------------------------------------------------------------------------------------------------------------------------------------------------------------------------------------------------------------------------------------------------------------------------------------------------------------------------------------------------------------------------------------------------------------------------------------------------------------------------------------------|--------------------------------------------------------------------------------------------------------------------------------------------------------------------------------------------------------------------------------------------------------------------------------------------------------------------------------------------------------------------------------------------------------------------------------------------------------------------------------------------------------------------------------------------------------------------------------------------------------------------------------------------------------------------------------------------------------------------------------------------------------------------------------------------------------------------------------------------------------------------------------------------------------------------------------------------------------------------------------------------------------------------------------------------------------------------------------------------------------------------------------------------------------------------------------------------------------------------------------------------------------------------------------------------------------------------------------------------------------------------------------------------------------------------------------------------------------------------------------------------------------------------------------------------------------------------------------------------------------------------------------------------------------------------------------------------------------------------------------------------------------------------------------------------------------------------------------------------------------------------------------------------------------------------------------------------------------------------------------------------------------------------------------------------------------------------------------------------------------------------------------------------------------------------------------------------------------------------------------------------------------------------------------------------------------------------------------------------------------------------------------------|------------------------------------------------------------------------------------------------------------------------------------------------------------------------------------------------------------------------------------------------------------------------------------------------------------------------------------------------------------------------------------------------------------------------------------------------------------------------------------------------------------------------------------------------------------------------------------------------------------------------------------------------------------------------------------------------------------------------------------------------------------------------------------------------------------------------------------------------------------------------------------------------------------------------------------------------------------------------------------------------------------------------------------------------------------------------------------------------------------------------------------------------------------------------------------------------------------------------------------------------------------------------------------------------------------------------------------------------------------------------------------------------------------------------------------------------------------------------------------------------------------------------------------------------------------------------------------------------------------------------------------------------------------------------------------------------------------------------------------------------------------------------------------------------------------------------------------------------------------------------------------------------------------------------------------------------------------------------------------------------------------------------------------------------------------------------------------|

|            |                                                                                                                                                                                                                                                                                                                                                                                                                                                                                                                                                                                                                                                                                                                                                                                                                                                                                                                                                                                                                                                                                                                                                                                                                                                                                                                                                                                                                                                                                                                                                                                                                                                                                                                                                                                                                     |                                                                                                                                                                                                                                                                                                                                                                                                                                                                                                                                                                                                                                                                                                                                                                                                                                                                                                                                                                                                                                                                                                                                                                                                                                                                                                                                                                                                                                                                                                                                                                                                                                                                                                                                                                                                                                                                                                  |                                                                                                                                                                                                                                                                                                                                                                                                                                                                                                                                                                                                                                                                                                                                                                                                                                                                                                                                                                                                                                                                                                                                                                                                                                                                                                                                                                                                                                                                                                                                                                                                                                                                                                                                        |
|------------|---------------------------------------------------------------------------------------------------------------------------------------------------------------------------------------------------------------------------------------------------------------------------------------------------------------------------------------------------------------------------------------------------------------------------------------------------------------------------------------------------------------------------------------------------------------------------------------------------------------------------------------------------------------------------------------------------------------------------------------------------------------------------------------------------------------------------------------------------------------------------------------------------------------------------------------------------------------------------------------------------------------------------------------------------------------------------------------------------------------------------------------------------------------------------------------------------------------------------------------------------------------------------------------------------------------------------------------------------------------------------------------------------------------------------------------------------------------------------------------------------------------------------------------------------------------------------------------------------------------------------------------------------------------------------------------------------------------------------------------------------------------------------------------------------------------------|--------------------------------------------------------------------------------------------------------------------------------------------------------------------------------------------------------------------------------------------------------------------------------------------------------------------------------------------------------------------------------------------------------------------------------------------------------------------------------------------------------------------------------------------------------------------------------------------------------------------------------------------------------------------------------------------------------------------------------------------------------------------------------------------------------------------------------------------------------------------------------------------------------------------------------------------------------------------------------------------------------------------------------------------------------------------------------------------------------------------------------------------------------------------------------------------------------------------------------------------------------------------------------------------------------------------------------------------------------------------------------------------------------------------------------------------------------------------------------------------------------------------------------------------------------------------------------------------------------------------------------------------------------------------------------------------------------------------------------------------------------------------------------------------------------------------------------------------------------------------------------------------------|----------------------------------------------------------------------------------------------------------------------------------------------------------------------------------------------------------------------------------------------------------------------------------------------------------------------------------------------------------------------------------------------------------------------------------------------------------------------------------------------------------------------------------------------------------------------------------------------------------------------------------------------------------------------------------------------------------------------------------------------------------------------------------------------------------------------------------------------------------------------------------------------------------------------------------------------------------------------------------------------------------------------------------------------------------------------------------------------------------------------------------------------------------------------------------------------------------------------------------------------------------------------------------------------------------------------------------------------------------------------------------------------------------------------------------------------------------------------------------------------------------------------------------------------------------------------------------------------------------------------------------------------------------------------------------------------------------------------------------------|
| <p>Q13</p> | <p>The time it takes for immunotherapy to work in controlling cancer can vary widely from patient to patient, and also depends on the type of cancer and the specific immunotherapy used. It's not unusual for immune responses to take several weeks or even a few months to become apparent.</p> <p>Unlike chemotherapy or radiation, which can lead to a relatively quick decrease in tumor size, immunotherapies work by enhancing or modifying the immune system's response to cancer. This process can take time. In some cases, there may even be a period of apparent tumor growth or a period when new lesions appear before the cancer begins to respond to the immunotherapy. This is because the immune cells are infiltrating the tumor, leading to an increase in its size, or because inflammation in the area causes swelling that can be mistaken for tumor growth, a phenomenon known as pseudo-progression.</p> <p>In other instances, people may not respond to immunotherapy at all. Unfortunately, not all cancers or all people respond to currently available immunotherapies. Researchers are working to understand why this is and to find ways to make these therapies effective for more people.</p> <p>Patients on immunotherapy are monitored closely for their response to treatment. This is typically done using imaging tests like CT or PET scans, which can visualize the size of tumors in the body. Blood tests may also be used to measure levels of certain markers that can indicate how well the treatment is working.</p> <p>The treating doctor will discuss the expected timeline for response based on the specifics of the patient's situation, including their overall health, the type and stage of cancer, and the specific type of immunotherapy being used.</p> | <p>The speed at which immunotherapy begins to control cancer can vary significantly and depends on numerous factors such as the type of cancer, the specific type of immunotherapy used, the patient's overall health, and the unique characteristics of the patient's immune system.</p> <p>Immunotherapy generally takes longer to show results compared to traditional therapies like chemotherapy or radiation therapy. This is because immunotherapy works by stimulating the patient's own immune system to fight the cancer, a process that can take some time to initiate and build momentum.</p> <p>In some cases, patients may begin to see a response in a matter of a few weeks, but for others, it may take several months. There are also instances where a patient's tumor may initially appear to grow or new lesions may develop before subsequently shrinking, a phenomenon known as "pseudo-progression." This is because the immune cells are infiltrating the tumor, causing temporary swelling or creating new areas of inflammation that might be mistaken for tumor growth in scans.</p> <p>Moreover, each patient's response to immunotherapy is different. Some patients may respond extremely well to treatment, while others may not respond at all. For some patients, immunotherapy can result in long-term cancer control.</p> <p>Due to the variable nature of responses, close monitoring is critical during immunotherapy. Physicians typically use a combination of physical exams, blood tests, and imaging scans to assess how well a patient is responding to treatment.</p> <p>It's also important to remember that while waiting for immunotherapy to show effects, the patient might experience side effects. These should be reported to the treating physician promptly, as managing side effects is a crucial aspect of immunotherapy treatment.</p> | <p>The timeline for immunotherapy's effects on cancer can be quite variable and depends on several factors, including the type of cancer, the specific type of immunotherapy, and the individual patient's overall health and response. Generally speaking, immunotherapy does not work as quickly as conventional treatments like chemotherapy or radiation, which kill cancer cells directly.</p> <p>Immunotherapy works by empowering the body's immune system to recognize and fight cancer cells. This process can take time, and it's not uncommon for several weeks or even a few months to pass before significant changes are seen. In some cases, the tumor may even appear to grow before it starts shrinking. This phenomenon, known as "pseudo-progression," occurs because as the immune system starts to attack the tumor, inflammation and an increase of immune cells can temporarily make the tumor seem larger on scans.</p> <p>Further, not all patients respond to immunotherapy, and predicting who will benefit remains a significant research focus. Some patients may have a remarkable and rapid response to immunotherapy, while others may experience a slower, more gradual response. Some may not respond at all or may find that their cancer eventually becomes resistant to the effects of immunotherapy.</p> <p>Patients receiving immunotherapy are monitored closely to evaluate how their cancer is responding to treatment. This monitoring often involves physical examinations, lab tests, and imaging scans. If you or someone you know is receiving immunotherapy, it's essential to maintain an open line of communication with the healthcare team about any side effects or concerns.</p> |
|------------|---------------------------------------------------------------------------------------------------------------------------------------------------------------------------------------------------------------------------------------------------------------------------------------------------------------------------------------------------------------------------------------------------------------------------------------------------------------------------------------------------------------------------------------------------------------------------------------------------------------------------------------------------------------------------------------------------------------------------------------------------------------------------------------------------------------------------------------------------------------------------------------------------------------------------------------------------------------------------------------------------------------------------------------------------------------------------------------------------------------------------------------------------------------------------------------------------------------------------------------------------------------------------------------------------------------------------------------------------------------------------------------------------------------------------------------------------------------------------------------------------------------------------------------------------------------------------------------------------------------------------------------------------------------------------------------------------------------------------------------------------------------------------------------------------------------------|--------------------------------------------------------------------------------------------------------------------------------------------------------------------------------------------------------------------------------------------------------------------------------------------------------------------------------------------------------------------------------------------------------------------------------------------------------------------------------------------------------------------------------------------------------------------------------------------------------------------------------------------------------------------------------------------------------------------------------------------------------------------------------------------------------------------------------------------------------------------------------------------------------------------------------------------------------------------------------------------------------------------------------------------------------------------------------------------------------------------------------------------------------------------------------------------------------------------------------------------------------------------------------------------------------------------------------------------------------------------------------------------------------------------------------------------------------------------------------------------------------------------------------------------------------------------------------------------------------------------------------------------------------------------------------------------------------------------------------------------------------------------------------------------------------------------------------------------------------------------------------------------------|----------------------------------------------------------------------------------------------------------------------------------------------------------------------------------------------------------------------------------------------------------------------------------------------------------------------------------------------------------------------------------------------------------------------------------------------------------------------------------------------------------------------------------------------------------------------------------------------------------------------------------------------------------------------------------------------------------------------------------------------------------------------------------------------------------------------------------------------------------------------------------------------------------------------------------------------------------------------------------------------------------------------------------------------------------------------------------------------------------------------------------------------------------------------------------------------------------------------------------------------------------------------------------------------------------------------------------------------------------------------------------------------------------------------------------------------------------------------------------------------------------------------------------------------------------------------------------------------------------------------------------------------------------------------------------------------------------------------------------------|

|                   |                                                                                                                                                                                                                                                                                                                                                                                                                                                                                                                                                                                                                                                                                                                                                                                                                                                                                                                                                                                                                                                                                                                                                                                                                                                                                                                                                                                                                                                                                                                                                                                                                                                                                                                                                                                        |                                                                                                                                                                                                                                                                                                                                                                                                                                                                                                                                                                                                                                                                                                                                                                                                                                                                                                                                                                                                                                                                                                                                                                                                                                                                                                                                                                                                                                                                                                                                                                   |                                                                                                                                                                                                                                                                                                                                                                                                                                                                                                                                                                                                                                                                                                                                                                                                                                                                                                                                                                                                                                                                                                                                                                                                                                                                                                                                                                                                                                                                                                                                                                                                                                                                                                                      |
|-------------------|----------------------------------------------------------------------------------------------------------------------------------------------------------------------------------------------------------------------------------------------------------------------------------------------------------------------------------------------------------------------------------------------------------------------------------------------------------------------------------------------------------------------------------------------------------------------------------------------------------------------------------------------------------------------------------------------------------------------------------------------------------------------------------------------------------------------------------------------------------------------------------------------------------------------------------------------------------------------------------------------------------------------------------------------------------------------------------------------------------------------------------------------------------------------------------------------------------------------------------------------------------------------------------------------------------------------------------------------------------------------------------------------------------------------------------------------------------------------------------------------------------------------------------------------------------------------------------------------------------------------------------------------------------------------------------------------------------------------------------------------------------------------------------------|-------------------------------------------------------------------------------------------------------------------------------------------------------------------------------------------------------------------------------------------------------------------------------------------------------------------------------------------------------------------------------------------------------------------------------------------------------------------------------------------------------------------------------------------------------------------------------------------------------------------------------------------------------------------------------------------------------------------------------------------------------------------------------------------------------------------------------------------------------------------------------------------------------------------------------------------------------------------------------------------------------------------------------------------------------------------------------------------------------------------------------------------------------------------------------------------------------------------------------------------------------------------------------------------------------------------------------------------------------------------------------------------------------------------------------------------------------------------------------------------------------------------------------------------------------------------|----------------------------------------------------------------------------------------------------------------------------------------------------------------------------------------------------------------------------------------------------------------------------------------------------------------------------------------------------------------------------------------------------------------------------------------------------------------------------------------------------------------------------------------------------------------------------------------------------------------------------------------------------------------------------------------------------------------------------------------------------------------------------------------------------------------------------------------------------------------------------------------------------------------------------------------------------------------------------------------------------------------------------------------------------------------------------------------------------------------------------------------------------------------------------------------------------------------------------------------------------------------------------------------------------------------------------------------------------------------------------------------------------------------------------------------------------------------------------------------------------------------------------------------------------------------------------------------------------------------------------------------------------------------------------------------------------------------------|
| <p><b>Q14</b></p> | <p>As of my last update in September 2021, multiple clinical trials have indicated that combination immunotherapy with ipilimumab (a CTLA-4 checkpoint inhibitor) and nivolumab (a PD-1 checkpoint inhibitor) can be more effective than single-agent immunotherapy for certain types of kidney cancer, specifically clear cell renal cell carcinoma (RCC), the most common type of kidney cancer.</p> <p>The CheckMate 214 trial, for instance, demonstrated that for intermediate and poor-risk patients with advanced renal cell carcinoma, the combination of nivolumab and ipilimumab resulted in longer overall survival and higher objective response rates compared to the standard treatment with a tyrosine kinase inhibitor, sunitinib.</p> <p>However, it's important to note that combination therapy can also lead to higher rates of side effects compared to single-agent therapy. Some of these side effects can be severe, leading to treatment discontinuation.</p> <p>Furthermore, treatment response can vary greatly from person to person. Some patients might respond better to combination therapy, while others might have a sufficient response with a single agent and hence avoid the increased risk of side effects associated with the combination.</p> <p>Doctors decide on the best treatment plan for each individual patient, taking into account the specifics of their cancer, their overall health, and the potential benefits and risks of the different treatment options.</p> <p>For the most recent and specific information about the treatment of kidney cancer, including the role of combination immunotherapy, consult with a healthcare provider or a specialist in oncology. They can provide up-to-date and personalized advice.</p> | <p>As of my knowledge cutoff in September 2021, several studies have suggested that the combination of ipilimumab and nivolumab can be more effective than single-agent immunotherapy for treating certain types of kidney cancer.</p> <p>One key study that supports this is the CheckMate 214 clinical trial. This trial investigated the combination of nivolumab (a PD-1 checkpoint inhibitor) and ipilimumab (a CTLA-4 checkpoint inhibitor) in patients with advanced renal cell carcinoma (RCC), which is the most common type of kidney cancer. The results showed that for intermediate and poor-risk patients, this combination significantly improved overall survival and caused a higher response rate compared to the standard of care at that time, a drug called sunitinib.</p> <p>However, it is important to note that the combination of ipilimumab and nivolumab can cause more severe side effects than either drug alone. These side effects can include fatigue, skin rash, diarrhea, and liver inflammation.</p> <p>Also, it's worth noting that cancer treatment is highly individualized, and what works best will depend on the specific characteristics of the cancer and the patient's overall health. So while the combination of ipilimumab and nivolumab may be more effective in some cases, single-agent therapy may be a better choice in others.</p> <p>For the most current information, it is best to consult with a healthcare provider or oncologist, as advances in treatment approaches are continually being made.</p> | <p>As of my last training data in September 2021, research had indeed indicated that for certain patients with advanced renal cell carcinoma (RCC), a common type of kidney cancer, the combination of ipilimumab and nivolumab could be more effective than single-agent immunotherapy.</p> <p>The CheckMate 214 clinical trial is a key study in this context. This trial found that, for patients with intermediate and poor-risk advanced RCC, the combination of nivolumab (a PD-1 checkpoint inhibitor) and ipilimumab (a CTLA-4 checkpoint inhibitor) resulted in significantly better overall survival and higher response rates compared to the then-standard treatment of sunitinib, a type of targeted therapy.</p> <p>However, it's crucial to note that the combination therapy often led to a higher incidence of severe side effects compared to single-agent therapy. These side effects are typically due to overactivation of the immune system and can include conditions such as colitis (inflammation of the colon), hepatitis (inflammation of the liver), and endocrinopathies (hormone imbalances).</p> <p>The decision between combination and single-agent immunotherapy, or any other treatment, is complex and must take into account various factors, including the type and stage of cancer, the patient's overall health status, potential side effects, and patient preferences. It should be made in discussion with a knowledgeable oncologist who is familiar with the latest research.</p> <p>Please consult with healthcare professionals for the most recent and personalized advice, as advances in cancer treatment are continuously being made beyond my training data.</p> |
|-------------------|----------------------------------------------------------------------------------------------------------------------------------------------------------------------------------------------------------------------------------------------------------------------------------------------------------------------------------------------------------------------------------------------------------------------------------------------------------------------------------------------------------------------------------------------------------------------------------------------------------------------------------------------------------------------------------------------------------------------------------------------------------------------------------------------------------------------------------------------------------------------------------------------------------------------------------------------------------------------------------------------------------------------------------------------------------------------------------------------------------------------------------------------------------------------------------------------------------------------------------------------------------------------------------------------------------------------------------------------------------------------------------------------------------------------------------------------------------------------------------------------------------------------------------------------------------------------------------------------------------------------------------------------------------------------------------------------------------------------------------------------------------------------------------------|-------------------------------------------------------------------------------------------------------------------------------------------------------------------------------------------------------------------------------------------------------------------------------------------------------------------------------------------------------------------------------------------------------------------------------------------------------------------------------------------------------------------------------------------------------------------------------------------------------------------------------------------------------------------------------------------------------------------------------------------------------------------------------------------------------------------------------------------------------------------------------------------------------------------------------------------------------------------------------------------------------------------------------------------------------------------------------------------------------------------------------------------------------------------------------------------------------------------------------------------------------------------------------------------------------------------------------------------------------------------------------------------------------------------------------------------------------------------------------------------------------------------------------------------------------------------|----------------------------------------------------------------------------------------------------------------------------------------------------------------------------------------------------------------------------------------------------------------------------------------------------------------------------------------------------------------------------------------------------------------------------------------------------------------------------------------------------------------------------------------------------------------------------------------------------------------------------------------------------------------------------------------------------------------------------------------------------------------------------------------------------------------------------------------------------------------------------------------------------------------------------------------------------------------------------------------------------------------------------------------------------------------------------------------------------------------------------------------------------------------------------------------------------------------------------------------------------------------------------------------------------------------------------------------------------------------------------------------------------------------------------------------------------------------------------------------------------------------------------------------------------------------------------------------------------------------------------------------------------------------------------------------------------------------------|

|            |                                                                                                                                                                                                                                                                                                                                                                                                                                                                                                                                                                                                                                                                                                                                                                                                                                                                                                                                                                                                                                                                                                                                                                                                                                                                                                                                                                                                                                                                                                                                                                                                                                                                                                                                                                                                                                                                                                                                                                                                                                                                                                                                                                                                                                                                                                 |                                                                                                                                                                                                                                                                                                                                                                                                                                                                                                                                                                                                                                                                                                                                                                                                                                                                                                                                                                                                                                                                                                                                                                                                                                                                                                                                                                                                                                                                                                                                                                                                                                                                                                                                                                                                                                                                                                                                                                                                                                                                                                                                                                                                                                                                                                                                                                                                                                                                                                              |                                                                                                                                                                                                                                                                                                                                                                                                                                                                                                                                                                                                                                                                                                                                                                                                                                                                                                                                                                                                                                                                                                                                                                                                                                                                                                                                                                                                                                                                                                                                                                                                                                                                                                                                                                                                                                                                                                                                                                                                                                                                                                                                                                                                                                                                                                                                                                                                                                                                                                                                                                |
|------------|-------------------------------------------------------------------------------------------------------------------------------------------------------------------------------------------------------------------------------------------------------------------------------------------------------------------------------------------------------------------------------------------------------------------------------------------------------------------------------------------------------------------------------------------------------------------------------------------------------------------------------------------------------------------------------------------------------------------------------------------------------------------------------------------------------------------------------------------------------------------------------------------------------------------------------------------------------------------------------------------------------------------------------------------------------------------------------------------------------------------------------------------------------------------------------------------------------------------------------------------------------------------------------------------------------------------------------------------------------------------------------------------------------------------------------------------------------------------------------------------------------------------------------------------------------------------------------------------------------------------------------------------------------------------------------------------------------------------------------------------------------------------------------------------------------------------------------------------------------------------------------------------------------------------------------------------------------------------------------------------------------------------------------------------------------------------------------------------------------------------------------------------------------------------------------------------------------------------------------------------------------------------------------------------------|--------------------------------------------------------------------------------------------------------------------------------------------------------------------------------------------------------------------------------------------------------------------------------------------------------------------------------------------------------------------------------------------------------------------------------------------------------------------------------------------------------------------------------------------------------------------------------------------------------------------------------------------------------------------------------------------------------------------------------------------------------------------------------------------------------------------------------------------------------------------------------------------------------------------------------------------------------------------------------------------------------------------------------------------------------------------------------------------------------------------------------------------------------------------------------------------------------------------------------------------------------------------------------------------------------------------------------------------------------------------------------------------------------------------------------------------------------------------------------------------------------------------------------------------------------------------------------------------------------------------------------------------------------------------------------------------------------------------------------------------------------------------------------------------------------------------------------------------------------------------------------------------------------------------------------------------------------------------------------------------------------------------------------------------------------------------------------------------------------------------------------------------------------------------------------------------------------------------------------------------------------------------------------------------------------------------------------------------------------------------------------------------------------------------------------------------------------------------------------------------------------------|----------------------------------------------------------------------------------------------------------------------------------------------------------------------------------------------------------------------------------------------------------------------------------------------------------------------------------------------------------------------------------------------------------------------------------------------------------------------------------------------------------------------------------------------------------------------------------------------------------------------------------------------------------------------------------------------------------------------------------------------------------------------------------------------------------------------------------------------------------------------------------------------------------------------------------------------------------------------------------------------------------------------------------------------------------------------------------------------------------------------------------------------------------------------------------------------------------------------------------------------------------------------------------------------------------------------------------------------------------------------------------------------------------------------------------------------------------------------------------------------------------------------------------------------------------------------------------------------------------------------------------------------------------------------------------------------------------------------------------------------------------------------------------------------------------------------------------------------------------------------------------------------------------------------------------------------------------------------------------------------------------------------------------------------------------------------------------------------------------------------------------------------------------------------------------------------------------------------------------------------------------------------------------------------------------------------------------------------------------------------------------------------------------------------------------------------------------------------------------------------------------------------------------------------------------------|
| <p>Q15</p> | <p>Resistance to Chimeric Antigen Receptor T-cell (CAR-T) therapy is a significant challenge and can occur due to a variety of reasons:</p> <ol style="list-style-type: none"> <li><b>Antigen Loss or Variation</b>: The most common mechanism of resistance to CAR-T cell therapy is the loss or variation of the targeted antigen on the surface of the cancer cells. This means that the CAR-T cells can no longer recognize or bind to the cancer cells, making the therapy ineffective. This is a significant issue in cancers that are heterogeneous, with different cells expressing different levels or types of antigens.</li> <li><b>Immunosuppressive Tumor Microenvironment</b>: The area around the tumor (known as the tumor microenvironment) can suppress the activity of the CAR-T cells. For example, other types of cells in the tumor microenvironment can release immunosuppressive molecules that inhibit CAR-T cell function. Additionally, the physical conditions within tumors, such as low oxygen levels, can also hamper CAR-T cell activity.</li> <li><b>T-cell Dysfunction or Exhaustion</b>: Over time, CAR-T cells can become dysfunctional or exhausted, meaning they can no longer effectively kill cancer cells. This can happen if there is a large amount of antigen present, leading to constant activation of the CAR-T cells and eventual exhaustion. It can also occur due to inhibitory signals from the tumor microenvironment.</li> <li><b>Limited CAR-T cell Persistence</b>: For sustained therapeutic effect, CAR-T cells need to survive in the body for a long time. However, in some cases, CAR-T cells do not persist in the body long enough to completely eradicate the cancer cells.</li> <li><b>Inadequate T-cell Trafficking</b>: Sometimes, CAR-T cells may not effectively reach the site of the tumor. This can occur due to barriers in the tumor's physical structure or because of signaling issues that prevent the CAR-T cells from being attracted to the tumor site.<br/>Research is ongoing to find ways to overcome these mechanisms of resistance, such as using combination therapies, improving CAR-T cell design, and modifying the tumor microenvironment to make it more conducive to CAR-T cell activity.</li> </ol> | <p>Chimeric Antigen Receptor T-cell (CAR-T) therapy is a type of immunotherapy where a patient's T cells are genetically modified to express a receptor (CAR) for a specific antigen present on the surface of the cancer cells. While CAR-T therapy has shown tremendous promise, particularly in hematological malignancies, resistance can develop through several mechanisms:</p> <ol style="list-style-type: none"> <li><b>Antigen loss or downregulation</b>: CAR-T therapy targets a specific antigen on the surface of cancer cells. If cancer cells lose or downregulate this antigen, the modified T cells may no longer recognize and kill these cells.</li> <li><b>Immunosuppressive tumor microenvironment</b>: The area surrounding the tumor can be immunosuppressive, impeding the function and persistence of CAR-T cells. This environment can contain other types of immune cells (like regulatory T cells or myeloid-derived suppressor cells), produce immunosuppressive cytokines (like TGF-beta or IL-10), or express immune checkpoint molecules (like PD-L1), all of which can limit the effectiveness of CAR-T cells.</li> <li><b>T-cell exhaustion</b>: Persistent antigen exposure and chronic activation can lead to CAR-T cell exhaustion, a state of dysfunction where T cells lose their ability to effectively kill cancer cells and proliferate.</li> <li><b>Insufficient T-cell trafficking</b>: Sometimes, CAR-T cells may not adequately infiltrate the tumor site, limiting their therapeutic effect.</li> <li><b>Lack of CAR-T cell persistence</b>: For CAR-T therapy to be effective, the modified T cells need to persist in the body for a prolonged period to eradicate the tumor fully. If these cells do not survive long enough, the therapy may not be effective.</li> <li><b>Antigen heterogeneity</b>: Some tumors may express varying levels of the targeted antigen on different cells or express different tumor antigens altogether, leading to incomplete tumor eradication.<br/>Researchers are working on various strategies to overcome these resistance mechanisms, including the development of multi-target CAR-T cells, the use of combination therapies, and ways to make CAR-T cells resistant to the immunosuppressive tumor environment. However, these are areas of active research as of my knowledge cutoff in September 2021. For the most recent advances, please consult the latest literature or a medical professional.</li> </ol> | <p>Chimeric Antigen Receptor T-cell (CAR-T) therapy has shown remarkable success in treating certain types of cancers, particularly hematologic malignancies like certain types of lymphomas and leukemias. However, some patients do not respond to CAR-T therapy, or they may initially respond but later relapse. Here are some of the main mechanisms for resistance to CAR-T therapy:</p> <ol style="list-style-type: none"> <li><b>Antigen Loss or Modulation</b>: CAR-T cells are engineered to recognize a specific antigen on cancer cells. If cancer cells lose or downregulate this antigen, CAR-T cells can no longer bind to and kill them, resulting in treatment failure. This mechanism is one of the most common ways resistance develops.</li> <li><b>Immunosuppressive Tumor Microenvironment</b>: Tumor cells can create a hostile environment that suppresses the function of immune cells, including CAR-T cells. This environment can include immunosuppressive cells, such as myeloid-derived suppressor cells and T-regulatory cells, and can also involve immunosuppressive cytokines and metabolic components.</li> <li><b>T-cell Exhaustion</b>: Chronic exposure to antigen can lead to T-cell exhaustion, a state where T cells lose their functional capacities. Exhausted T cells show less proliferation, reduced production of cytokines, and an increased expression of inhibitory receptors.</li> <li><b>Poor T-cell Trafficking and Infiltration</b>: For CAR-T cells to work effectively, they need to be able to reach the tumor site and infiltrate it. Some tumors may be located in hard-to-reach areas or have physical characteristics that make infiltration difficult.</li> <li><b>Lack of CAR-T Cell Persistence</b>: CAR-T cells need to persist in the body for a sustained period to successfully eliminate the tumor. If the CAR-T cells do not survive long enough, possibly due to suboptimal activation or proliferation, the therapy can fail.<br/>Ongoing research is attempting to overcome these resistance mechanisms, with strategies including but not limited to: using multiple CAR targets to prevent antigen escape, combining CAR-T therapy with other treatments to modulate the tumor microenvironment, and engineering CAR-T cells to resist exhaustion and improve persistence. However, these strategies are still under investigation as of my last update in September 2021. For the most recent developments, please consult recent literature or a medical professional.</li> </ol> |
|------------|-------------------------------------------------------------------------------------------------------------------------------------------------------------------------------------------------------------------------------------------------------------------------------------------------------------------------------------------------------------------------------------------------------------------------------------------------------------------------------------------------------------------------------------------------------------------------------------------------------------------------------------------------------------------------------------------------------------------------------------------------------------------------------------------------------------------------------------------------------------------------------------------------------------------------------------------------------------------------------------------------------------------------------------------------------------------------------------------------------------------------------------------------------------------------------------------------------------------------------------------------------------------------------------------------------------------------------------------------------------------------------------------------------------------------------------------------------------------------------------------------------------------------------------------------------------------------------------------------------------------------------------------------------------------------------------------------------------------------------------------------------------------------------------------------------------------------------------------------------------------------------------------------------------------------------------------------------------------------------------------------------------------------------------------------------------------------------------------------------------------------------------------------------------------------------------------------------------------------------------------------------------------------------------------------|--------------------------------------------------------------------------------------------------------------------------------------------------------------------------------------------------------------------------------------------------------------------------------------------------------------------------------------------------------------------------------------------------------------------------------------------------------------------------------------------------------------------------------------------------------------------------------------------------------------------------------------------------------------------------------------------------------------------------------------------------------------------------------------------------------------------------------------------------------------------------------------------------------------------------------------------------------------------------------------------------------------------------------------------------------------------------------------------------------------------------------------------------------------------------------------------------------------------------------------------------------------------------------------------------------------------------------------------------------------------------------------------------------------------------------------------------------------------------------------------------------------------------------------------------------------------------------------------------------------------------------------------------------------------------------------------------------------------------------------------------------------------------------------------------------------------------------------------------------------------------------------------------------------------------------------------------------------------------------------------------------------------------------------------------------------------------------------------------------------------------------------------------------------------------------------------------------------------------------------------------------------------------------------------------------------------------------------------------------------------------------------------------------------------------------------------------------------------------------------------------------------|----------------------------------------------------------------------------------------------------------------------------------------------------------------------------------------------------------------------------------------------------------------------------------------------------------------------------------------------------------------------------------------------------------------------------------------------------------------------------------------------------------------------------------------------------------------------------------------------------------------------------------------------------------------------------------------------------------------------------------------------------------------------------------------------------------------------------------------------------------------------------------------------------------------------------------------------------------------------------------------------------------------------------------------------------------------------------------------------------------------------------------------------------------------------------------------------------------------------------------------------------------------------------------------------------------------------------------------------------------------------------------------------------------------------------------------------------------------------------------------------------------------------------------------------------------------------------------------------------------------------------------------------------------------------------------------------------------------------------------------------------------------------------------------------------------------------------------------------------------------------------------------------------------------------------------------------------------------------------------------------------------------------------------------------------------------------------------------------------------------------------------------------------------------------------------------------------------------------------------------------------------------------------------------------------------------------------------------------------------------------------------------------------------------------------------------------------------------------------------------------------------------------------------------------------------------|

ChatGPT-4 - INDICATIONS

|            |                                                                                                                                                                                                                                                                                                                                                                                                                                                                                                                                                                                                                                                                                                                                                                                                                                                                                                                                                                                                                                                                                                                                                                                                                                                                                                                                                                                                                                                                                                                                                                                                                                                                                                                                                                                                                                      |                                                                                                                                                                                                                                                                                                                                                                                                                                                                                                                                                                                                                                                                                                                                                                                                                                                                                                                                                                                                                                                                                                                                                                                                                                                                                                                                                                                                                                                                                                                                                                                                                                                                                                                                                                                                                                                                                                                                                                                                                                                                                |                                                                                                                                                                                                                                                                                                                                                                                                                                                                                                                                                                                                                                                                                                                                                                                                                                                                                                                                                                                                                                                                                                                                                                                                                                                                                                                                                                                                                                                                                                                                                                                                                                                                                                                                                                                                                                                                                                                                                                                                                                                                             |
|------------|--------------------------------------------------------------------------------------------------------------------------------------------------------------------------------------------------------------------------------------------------------------------------------------------------------------------------------------------------------------------------------------------------------------------------------------------------------------------------------------------------------------------------------------------------------------------------------------------------------------------------------------------------------------------------------------------------------------------------------------------------------------------------------------------------------------------------------------------------------------------------------------------------------------------------------------------------------------------------------------------------------------------------------------------------------------------------------------------------------------------------------------------------------------------------------------------------------------------------------------------------------------------------------------------------------------------------------------------------------------------------------------------------------------------------------------------------------------------------------------------------------------------------------------------------------------------------------------------------------------------------------------------------------------------------------------------------------------------------------------------------------------------------------------------------------------------------------------|--------------------------------------------------------------------------------------------------------------------------------------------------------------------------------------------------------------------------------------------------------------------------------------------------------------------------------------------------------------------------------------------------------------------------------------------------------------------------------------------------------------------------------------------------------------------------------------------------------------------------------------------------------------------------------------------------------------------------------------------------------------------------------------------------------------------------------------------------------------------------------------------------------------------------------------------------------------------------------------------------------------------------------------------------------------------------------------------------------------------------------------------------------------------------------------------------------------------------------------------------------------------------------------------------------------------------------------------------------------------------------------------------------------------------------------------------------------------------------------------------------------------------------------------------------------------------------------------------------------------------------------------------------------------------------------------------------------------------------------------------------------------------------------------------------------------------------------------------------------------------------------------------------------------------------------------------------------------------------------------------------------------------------------------------------------------------------|-----------------------------------------------------------------------------------------------------------------------------------------------------------------------------------------------------------------------------------------------------------------------------------------------------------------------------------------------------------------------------------------------------------------------------------------------------------------------------------------------------------------------------------------------------------------------------------------------------------------------------------------------------------------------------------------------------------------------------------------------------------------------------------------------------------------------------------------------------------------------------------------------------------------------------------------------------------------------------------------------------------------------------------------------------------------------------------------------------------------------------------------------------------------------------------------------------------------------------------------------------------------------------------------------------------------------------------------------------------------------------------------------------------------------------------------------------------------------------------------------------------------------------------------------------------------------------------------------------------------------------------------------------------------------------------------------------------------------------------------------------------------------------------------------------------------------------------------------------------------------------------------------------------------------------------------------------------------------------------------------------------------------------------------------------------------------------|
| <p>Q16</p> | <p>Immunotherapy has shown promising results in treating melanoma, including brain metastases. However, the specific effectiveness in asymptomatic brain metastases may vary based on several factors.</p> <p>Two main types of immunotherapies have been used to treat melanoma, including metastatic brain tumors: checkpoint inhibitors and adoptive cell transfer.</p> <p>Checkpoint inhibitors such as ipilimumab (which targets CTLA-4), nivolumab and pembrolizumab (which target PD-1) have been shown to be effective in treating metastatic melanoma, including brain metastases. These drugs work by taking the "brakes" off the immune system, allowing it to attack cancer cells more effectively.</p> <p>Adoptive cell transfer is a treatment approach where T cells (a type of white blood cell that's part of the immune system) are removed from a patient, modified in a lab to enhance their ability to fight cancer, and then infused back into the patient. This treatment method can also be effective, but it's more complex and is usually only available in specialized centers.</p> <p>Whether these treatments would be used in asymptomatic brain metastases would depend on various factors, including the size and location of the metastases, the patient's overall health, and their response to previous treatments. Treatment decisions are typically made on a case-by-case basis, in consultation with a team of healthcare providers.</p> <p>As of my knowledge cutoff in September 2021, this is the most up-to-date information available. For the most current and individualized treatment options, it's always best to consult with a healthcare provider or cancer specialist. They can provide information based on the latest research, clinical trials, and treatment guidelines.</p> | <p>Immunotherapy, including checkpoint inhibitors like pembrolizumab (Keytruda) and nivolumab (Opdivo), has been increasingly used to treat advanced melanoma, including brain metastases. Some clinical trials and studies have shown positive results, indicating that these drugs can shrink or even eliminate melanoma brain metastases in some patients.</p> <p>However, as of my knowledge cut-off in September 2021, there is less information available specifically about the use of immunotherapy for asymptomatic melanoma brain metastases. This is partly because asymptomatic brain metastases are often not discovered until they become symptomatic, at which point treatment options may be different.</p> <p>In general, the decision to treat asymptomatic melanoma brain metastases will depend on various factors, including the number, size, and location of the metastases, the overall health and life expectancy of the patient, and the potential benefits and risks of treatment. Even if a patient is asymptomatic, treatment may still be recommended to prevent the development of symptoms and improve prognosis.</p> <p>While immunotherapy can be an effective treatment for some patients with melanoma brain metastases, it's not the right choice for everyone. Some patients may not respond to these drugs, or they may experience severe side effects. Other treatment options, such as surgery, stereotactic radiosurgery, or whole-brain radiation, may be more appropriate in certain cases.</p> <p>The field of immunotherapy is rapidly evolving, with ongoing research and new treatments being developed. If you or a loved one is dealing with melanoma brain metastases, it's important to discuss treatment options with your healthcare team, who can provide the most up-to-date and personalized advice.</p> <p>Please note that my knowledge cut-off is September 2021, and there may have been advancements or new findings since then. Always consult with a healthcare provider for the most current information.</p> | <p>Immunotherapy is a type of cancer treatment that helps your immune system fight cancer. In the case of melanoma, especially advanced stages that have spread (metastasized) to other parts of the body such as the brain, immunotherapy has shown significant promise.</p> <p>Checkpoint inhibitors are a type of immunotherapy that have been used to treat melanoma. These drugs, such as nivolumab (Opdivo) and pembrolizumab (Keytruda), block proteins that stop the immune system from attacking cancer cells. These inhibitors can be effective in treating melanoma that has metastasized to the brain.</p> <p>However, the effectiveness of immunotherapy on asymptomatic melanoma brain metastases is not as well established. This is because the decision to initiate treatment for asymptomatic brain metastases can depend on many factors, including the size and number of metastases, the patient's overall health status, and the potential risks and benefits of treatment. Furthermore, many studies and clinical trials focus on symptomatic patients because their need for treatment is more urgent.</p> <p>Despite this, there is a growing body of research suggesting that early treatment of asymptomatic brain metastases can be beneficial, and immunotherapy may play a role in this context. In general, immunotherapy can potentially prevent growth and symptoms from occurring in these metastases.</p> <p>It's also important to note that not every patient responds to immunotherapy, and there can be side effects, some of which can be severe. Therefore, the decision to use immunotherapy should be made on a case-by-case basis in consultation with a healthcare provider or oncologist.</p> <p>As of my last training cut-off in September 2021, this is the most accurate information available. However, the field of cancer treatment is rapidly advancing, and new research or treatments may have emerged since then. For the most current advice, please consult with a healthcare provider or cancer specialist.</p> |
|------------|--------------------------------------------------------------------------------------------------------------------------------------------------------------------------------------------------------------------------------------------------------------------------------------------------------------------------------------------------------------------------------------------------------------------------------------------------------------------------------------------------------------------------------------------------------------------------------------------------------------------------------------------------------------------------------------------------------------------------------------------------------------------------------------------------------------------------------------------------------------------------------------------------------------------------------------------------------------------------------------------------------------------------------------------------------------------------------------------------------------------------------------------------------------------------------------------------------------------------------------------------------------------------------------------------------------------------------------------------------------------------------------------------------------------------------------------------------------------------------------------------------------------------------------------------------------------------------------------------------------------------------------------------------------------------------------------------------------------------------------------------------------------------------------------------------------------------------------|--------------------------------------------------------------------------------------------------------------------------------------------------------------------------------------------------------------------------------------------------------------------------------------------------------------------------------------------------------------------------------------------------------------------------------------------------------------------------------------------------------------------------------------------------------------------------------------------------------------------------------------------------------------------------------------------------------------------------------------------------------------------------------------------------------------------------------------------------------------------------------------------------------------------------------------------------------------------------------------------------------------------------------------------------------------------------------------------------------------------------------------------------------------------------------------------------------------------------------------------------------------------------------------------------------------------------------------------------------------------------------------------------------------------------------------------------------------------------------------------------------------------------------------------------------------------------------------------------------------------------------------------------------------------------------------------------------------------------------------------------------------------------------------------------------------------------------------------------------------------------------------------------------------------------------------------------------------------------------------------------------------------------------------------------------------------------------|-----------------------------------------------------------------------------------------------------------------------------------------------------------------------------------------------------------------------------------------------------------------------------------------------------------------------------------------------------------------------------------------------------------------------------------------------------------------------------------------------------------------------------------------------------------------------------------------------------------------------------------------------------------------------------------------------------------------------------------------------------------------------------------------------------------------------------------------------------------------------------------------------------------------------------------------------------------------------------------------------------------------------------------------------------------------------------------------------------------------------------------------------------------------------------------------------------------------------------------------------------------------------------------------------------------------------------------------------------------------------------------------------------------------------------------------------------------------------------------------------------------------------------------------------------------------------------------------------------------------------------------------------------------------------------------------------------------------------------------------------------------------------------------------------------------------------------------------------------------------------------------------------------------------------------------------------------------------------------------------------------------------------------------------------------------------------------|

|            |                                                                                                                                                                                                                                                                                                                                                                                                                                                                                                                                                                                                                                                                                                                                                                                                                                                                                                                                                                                                                                                                                                                                                                                                                                                                                                                                                                                                                                                                                                                                                                                                                                                                                                                                                                                                                                                                                                                                                                                                                                                                                                                                                                                |                                                                                                                                                                                                                                                                                                                                                                                                                                                                                                                                                                                                                                                                                                                                                                                                                                                                                                                                                                                                                                                                                                                                                                                                                                                                                                                                                                                                                                                                                                                                                                                                                                                                                                                                                                                                                                                                                                                                                                                                                                                    |                                                                                                                                                                                                                                                                                                                                                                                                                                                                                                                                                                                                                                                                                                                                                                                                                                                                                                                                                                                                                                                                                                                                                                                                                                                                                                                                                                                                                                                                                                                                                                                                                                                                                                                                                                                                                                                                                                                                                 |
|------------|--------------------------------------------------------------------------------------------------------------------------------------------------------------------------------------------------------------------------------------------------------------------------------------------------------------------------------------------------------------------------------------------------------------------------------------------------------------------------------------------------------------------------------------------------------------------------------------------------------------------------------------------------------------------------------------------------------------------------------------------------------------------------------------------------------------------------------------------------------------------------------------------------------------------------------------------------------------------------------------------------------------------------------------------------------------------------------------------------------------------------------------------------------------------------------------------------------------------------------------------------------------------------------------------------------------------------------------------------------------------------------------------------------------------------------------------------------------------------------------------------------------------------------------------------------------------------------------------------------------------------------------------------------------------------------------------------------------------------------------------------------------------------------------------------------------------------------------------------------------------------------------------------------------------------------------------------------------------------------------------------------------------------------------------------------------------------------------------------------------------------------------------------------------------------------|----------------------------------------------------------------------------------------------------------------------------------------------------------------------------------------------------------------------------------------------------------------------------------------------------------------------------------------------------------------------------------------------------------------------------------------------------------------------------------------------------------------------------------------------------------------------------------------------------------------------------------------------------------------------------------------------------------------------------------------------------------------------------------------------------------------------------------------------------------------------------------------------------------------------------------------------------------------------------------------------------------------------------------------------------------------------------------------------------------------------------------------------------------------------------------------------------------------------------------------------------------------------------------------------------------------------------------------------------------------------------------------------------------------------------------------------------------------------------------------------------------------------------------------------------------------------------------------------------------------------------------------------------------------------------------------------------------------------------------------------------------------------------------------------------------------------------------------------------------------------------------------------------------------------------------------------------------------------------------------------------------------------------------------------------|-------------------------------------------------------------------------------------------------------------------------------------------------------------------------------------------------------------------------------------------------------------------------------------------------------------------------------------------------------------------------------------------------------------------------------------------------------------------------------------------------------------------------------------------------------------------------------------------------------------------------------------------------------------------------------------------------------------------------------------------------------------------------------------------------------------------------------------------------------------------------------------------------------------------------------------------------------------------------------------------------------------------------------------------------------------------------------------------------------------------------------------------------------------------------------------------------------------------------------------------------------------------------------------------------------------------------------------------------------------------------------------------------------------------------------------------------------------------------------------------------------------------------------------------------------------------------------------------------------------------------------------------------------------------------------------------------------------------------------------------------------------------------------------------------------------------------------------------------------------------------------------------------------------------------------------------------|
| <p>Q17</p> | <p>Yes, immunotherapy has been found to be effective in the treatment of Hodgkin lymphoma (HL). As of my knowledge cutoff in September 2021, several immunotherapy drugs have been approved by the U.S. Food and Drug Administration (FDA) for the treatment of Hodgkin lymphoma.</p> <p>Checkpoint inhibitors, in particular, have shown promise. These drugs work by blocking proteins that prevent the immune system from attacking cancer cells. Examples of checkpoint inhibitors used in the treatment of HL include:</p> <ol style="list-style-type: none"> <li>1. Nivolumab (Opdivo): This is a PD-1 inhibitor. The FDA has approved nivolumab for use in adults with classical Hodgkin lymphoma (cHL) that has relapsed or progressed after autologous hematopoietic stem cell transplantation (HSCT) and post-transplantation brentuximab vedotin (a type of targeted therapy).</li> <li>2. Pembrolizumab (Keytruda): This is another PD-1 inhibitor. Pembrolizumab is approved for use in adults and children with refractory cHL, or cHL that has relapsed after three or more prior lines of therapy.</li> </ol> <p>Another type of immunotherapy, called chimeric antigen receptor (CAR) T-cell therapy, has shown promising results in clinical trials for treating relapsed or refractory HL, but as of my knowledge cutoff in September 2021, it was not yet FDA-approved for this indication.</p> <p>Brentuximab vedotin (Adcetris) is another drug used for HL treatment, which is a type of targeted therapy. It is an antibody-drug conjugate that combines an antibody (a protein that recognizes and binds to specific targets on cells) with a chemotherapy drug. The antibody part of the drug binds to a protein called CD30, which is found on HL cells. Then the chemotherapy drug can enter these cells and kill them.</p> <p>As with any cancer treatment, the effectiveness of these drugs can vary between patients, and they can have side effects. Therefore, it's crucial for treatment decisions to be made in consultation with a healthcare provider or cancer specialist, who can provide the most current and personalized advice.</p> | <p>Yes, immunotherapy has shown effectiveness in treating Hodgkin lymphoma (HL). Several immunotherapy drugs have been approved for the treatment of Hodgkin lymphoma, with others being studied in clinical trials.</p> <p>As of my last update in September 2021, these include:</p> <ol style="list-style-type: none"> <li>1. <b>Checkpoint Inhibitors:</b> These work by blocking the proteins that prevent the immune system from attacking the cancer cells. Nivolumab (Opdivo) and Pembrolizumab (Keytruda) are examples of these PD-1 inhibitors that are FDA-approved for use in Hodgkin lymphoma patients who have relapsed or whose disease has progressed after other treatments.</li> <li>2. <b>Brentuximab vedotin (Adcetris):</b> This is a type of targeted therapy, but it also has an immunotherapy aspect. The drug is an antibody-drug conjugate, meaning it combines an antibody (which can bind to a specific target on cancer cells) with a chemotherapy drug. The antibody part of the drug can bind to a protein called CD30 found on HL cells. Once it's attached, the chemotherapy drug can enter the cancer cells and kill them. This drug is often used if HL returns after initial treatment, or as a first-line treatment in certain cases.</li> <li>3. <b>CAR-T Cell Therapy:</b> Chimeric antigen receptor (CAR) T-cell therapy is a type of immunotherapy where immune cells are removed from the body, genetically altered to better fight cancer, and then reintroduced into the body. While this treatment has shown promise in clinical trials for Hodgkin lymphoma, it has not been approved specifically for this disease as of my knowledge cutoff in 2021.</li> </ol> <p>While immunotherapy has significantly advanced the treatment options and prognosis for many patients with Hodgkin lymphoma, it is important to note that each patient is unique and responses to treatment can vary. Therefore, all treatment decisions should be made in consultation with an experienced healthcare team.</p> | <p>Yes, immunotherapy has shown effectiveness in treating Hodgkin lymphoma (HL). Several immunotherapy drugs have been approved for the treatment of Hodgkin lymphoma, with others being studied in clinical trials.</p> <p>Here are a few examples as of my last update in September 2021:</p> <ol style="list-style-type: none"> <li>1. <b>Checkpoint inhibitors:</b> These work by targeting proteins that help cancer cells evade the immune system. The checkpoint inhibitors nivolumab (Opdivo) and pembrolizumab (Keytruda) are approved for use in patients with classical Hodgkin lymphoma that has returned or progressed after certain types of treatment.</li> <li>2. <b>Brentuximab vedotin (Adcetris):</b> While technically considered a type of targeted therapy, this drug does have an immune component. It combines an antibody (which can bind to a specific target on cells) with a chemotherapy drug. The antibody targets a protein called CD30 that's found on the surface of Hodgkin lymphoma cells, and it delivers the chemotherapy drug directly to these cells.</li> <li>3. <b>CAR T-cell therapy:</b> This is a newer type of immunotherapy where immune cells are removed from the body, modified in a lab to better recognize and attack cancer cells, and then reinfused back into the patient. While this has shown promise in treating certain types of lymphoma, as of my knowledge cutoff in September 2021, CAR T-cell therapy is not yet FDA-approved for Hodgkin lymphoma.</li> </ol> <p>It's important to note that while immunotherapy has significantly advanced the treatment options for Hodgkin lymphoma, not all patients respond to these treatments, and they can have side effects. The decision to use immunotherapy, and which type to use, depends on many factors, including the specific characteristics of the lymphoma, the patient's overall health, and their treatment history.</p> |
|------------|--------------------------------------------------------------------------------------------------------------------------------------------------------------------------------------------------------------------------------------------------------------------------------------------------------------------------------------------------------------------------------------------------------------------------------------------------------------------------------------------------------------------------------------------------------------------------------------------------------------------------------------------------------------------------------------------------------------------------------------------------------------------------------------------------------------------------------------------------------------------------------------------------------------------------------------------------------------------------------------------------------------------------------------------------------------------------------------------------------------------------------------------------------------------------------------------------------------------------------------------------------------------------------------------------------------------------------------------------------------------------------------------------------------------------------------------------------------------------------------------------------------------------------------------------------------------------------------------------------------------------------------------------------------------------------------------------------------------------------------------------------------------------------------------------------------------------------------------------------------------------------------------------------------------------------------------------------------------------------------------------------------------------------------------------------------------------------------------------------------------------------------------------------------------------------|----------------------------------------------------------------------------------------------------------------------------------------------------------------------------------------------------------------------------------------------------------------------------------------------------------------------------------------------------------------------------------------------------------------------------------------------------------------------------------------------------------------------------------------------------------------------------------------------------------------------------------------------------------------------------------------------------------------------------------------------------------------------------------------------------------------------------------------------------------------------------------------------------------------------------------------------------------------------------------------------------------------------------------------------------------------------------------------------------------------------------------------------------------------------------------------------------------------------------------------------------------------------------------------------------------------------------------------------------------------------------------------------------------------------------------------------------------------------------------------------------------------------------------------------------------------------------------------------------------------------------------------------------------------------------------------------------------------------------------------------------------------------------------------------------------------------------------------------------------------------------------------------------------------------------------------------------------------------------------------------------------------------------------------------------|-------------------------------------------------------------------------------------------------------------------------------------------------------------------------------------------------------------------------------------------------------------------------------------------------------------------------------------------------------------------------------------------------------------------------------------------------------------------------------------------------------------------------------------------------------------------------------------------------------------------------------------------------------------------------------------------------------------------------------------------------------------------------------------------------------------------------------------------------------------------------------------------------------------------------------------------------------------------------------------------------------------------------------------------------------------------------------------------------------------------------------------------------------------------------------------------------------------------------------------------------------------------------------------------------------------------------------------------------------------------------------------------------------------------------------------------------------------------------------------------------------------------------------------------------------------------------------------------------------------------------------------------------------------------------------------------------------------------------------------------------------------------------------------------------------------------------------------------------------------------------------------------------------------------------------------------------|

|            |                                                                                                                                                                                                                                                                                                                                                                                                                                                                                                                                                                                                                                                                                                                                                                                                                                                                                                                                                                                                                                                                                                                                                                                                                                                                                                                                                                                                                                                                                                                                                                                                                                                                                                                                                                                                                                                                                                                                                                                                                                                                                                                                                                                                                                                                                                                                                                                   |                                                                                                                                                                                                                                                                                                                                                                                                                                                                                                                                                                                                                                                                                                                                                                                                                                                                                                                                                                                                                                                                                                                                                                                                                                                                                                                                                                                                                                                                                                                                                                                                                                                                                                                                                                                                                                                                                                                                                                                                                                                                                                                                                                                                                                                                  |                                                                                                                                                                                                                                                                                                                                                                                                                                                                                                                                                                                                                                                                                                                                                                                                                                                                                                                                                                                                                                                                                                                                                                                                                                                                                                                                                                                                                                                                                                                                                                                                                                                                                                                                                                                                                                                                                                       |
|------------|-----------------------------------------------------------------------------------------------------------------------------------------------------------------------------------------------------------------------------------------------------------------------------------------------------------------------------------------------------------------------------------------------------------------------------------------------------------------------------------------------------------------------------------------------------------------------------------------------------------------------------------------------------------------------------------------------------------------------------------------------------------------------------------------------------------------------------------------------------------------------------------------------------------------------------------------------------------------------------------------------------------------------------------------------------------------------------------------------------------------------------------------------------------------------------------------------------------------------------------------------------------------------------------------------------------------------------------------------------------------------------------------------------------------------------------------------------------------------------------------------------------------------------------------------------------------------------------------------------------------------------------------------------------------------------------------------------------------------------------------------------------------------------------------------------------------------------------------------------------------------------------------------------------------------------------------------------------------------------------------------------------------------------------------------------------------------------------------------------------------------------------------------------------------------------------------------------------------------------------------------------------------------------------------------------------------------------------------------------------------------------------|------------------------------------------------------------------------------------------------------------------------------------------------------------------------------------------------------------------------------------------------------------------------------------------------------------------------------------------------------------------------------------------------------------------------------------------------------------------------------------------------------------------------------------------------------------------------------------------------------------------------------------------------------------------------------------------------------------------------------------------------------------------------------------------------------------------------------------------------------------------------------------------------------------------------------------------------------------------------------------------------------------------------------------------------------------------------------------------------------------------------------------------------------------------------------------------------------------------------------------------------------------------------------------------------------------------------------------------------------------------------------------------------------------------------------------------------------------------------------------------------------------------------------------------------------------------------------------------------------------------------------------------------------------------------------------------------------------------------------------------------------------------------------------------------------------------------------------------------------------------------------------------------------------------------------------------------------------------------------------------------------------------------------------------------------------------------------------------------------------------------------------------------------------------------------------------------------------------------------------------------------------------|-------------------------------------------------------------------------------------------------------------------------------------------------------------------------------------------------------------------------------------------------------------------------------------------------------------------------------------------------------------------------------------------------------------------------------------------------------------------------------------------------------------------------------------------------------------------------------------------------------------------------------------------------------------------------------------------------------------------------------------------------------------------------------------------------------------------------------------------------------------------------------------------------------------------------------------------------------------------------------------------------------------------------------------------------------------------------------------------------------------------------------------------------------------------------------------------------------------------------------------------------------------------------------------------------------------------------------------------------------------------------------------------------------------------------------------------------------------------------------------------------------------------------------------------------------------------------------------------------------------------------------------------------------------------------------------------------------------------------------------------------------------------------------------------------------------------------------------------------------------------------------------------------------|
| <p>Q18</p> | <p>The first-line treatment for metastatic head and neck cancer usually includes a combination of therapies. However, the specific treatment can vary depending on several factors, such as the patient's overall health, the specific location of the cancer, and the extent of cancer spread.</p> <p>As of my knowledge cutoff in September 2021, the following treatments are commonly used:</p> <ol style="list-style-type: none"> <li><b>Chemotherapy:</b> Platinum-based chemotherapy agents, such as cisplatin or carboplatin, are often used in combination with other drugs such as fluorouracil (5-FU).</li> <li><b>Targeted therapy:</b> Cetuximab (Erbix) is a monoclonal antibody that targets the epidermal growth factor receptor (EGFR), which is often overexpressed in head and neck cancers. It's sometimes used in combination with platinum-based chemotherapy.</li> <li><b>Immunotherapy:</b> Recently, immunotherapy agents like pembrolizumab (Keytruda) and nivolumab (Opdivo) have been approved for use in certain cases of head and neck cancer. Pembrolizumab, in particular, is approved as a first-line treatment for patients with metastatic or unresectable, recurrent head and neck squamous cell carcinoma (HNSCC) in combination with platinum and fluorouracil chemotherapy. It is also approved as a single agent for patients with disease progression on or after platinum-containing chemotherapy.</li> <li><b>Radiation therapy:</b> For some patients, radiation therapy may also be a part of the first-line treatment strategy, often in combination with chemotherapy, a strategy known as chemoradiation.</li> </ol> <p>The choice of treatment should be individualized based on the patient's characteristics, including their performance status, comorbidities, and preferences. Additionally, the molecular characteristics of the tumor, such as the presence of human papillomavirus (HPV) and the tumor's PD-L1 expression level, may influence the choice of treatment. It's important for patients to have these discussions with their healthcare provider to decide on the best course of action.</p> <p>Remember, my information is up-to-date as of September 2021, and newer treatments or guidelines may have emerged since then. Always consult with a healthcare provider for the most current information.</p> | <p>The first-line treatment for metastatic head and neck cancer can vary depending on the specifics of the disease, the patient's health status, and their personal preferences. However, as of my last update in September 2021, the common first-line treatments usually involve a combination of chemotherapy, targeted therapy, and immunotherapy.</p> <ol style="list-style-type: none"> <li><b>Chemotherapy:</b> Platinum-based chemotherapy drugs such as cisplatin or carboplatin, often in combination with other chemotherapy agents like fluorouracil (5-FU), are frequently used in the first-line treatment.</li> <li><b>Targeted Therapy:</b> The targeted therapy drug cetuximab (Erbix) is often used in combination with chemotherapy. Cetuximab targets the epidermal growth factor receptor (EGFR), a protein found in high amounts on some types of cancer cells.</li> <li><b>Immunotherapy:</b> Pembrolizumab (Keytruda) or nivolumab (Opdivo) may be used in certain cases, particularly in patients whose tumors express a protein called PD-L1, or whose cancers are not responsive to cisplatin. Pembrolizumab is now approved as a first-line treatment, either alone or in combination with chemotherapy, for patients with metastatic or unresectable, recurrent head and neck squamous cell carcinoma (HNSCC).</li> </ol> <p>The choice of first-line treatment is generally decided after considering several factors, including the specifics of the disease, the patient's performance status, potential side effects, and the patient's personal preferences.</p> <p>It's also important to note that treatment plans are individualized and based on the specifics of each patient's situation. What works best for one patient might not be the most effective approach for another. Therefore, it's always important for patients to discuss all potential treatment options with their healthcare provider.</p> <p>As research advances and more is learned about this disease, treatment approaches continue to evolve. My information is up-to-date as of September 2021, and newer treatments or guidelines may have emerged since then. Always consult with a healthcare provider for the most current information.</p> | <p>The first-line treatment for metastatic head and neck cancer usually involves a combination of therapies. However, the specific treatment can vary depending on several factors, including the type and location of the cancer, the patient's overall health, and the extent of the disease.</p> <p>As of my knowledge cut-off in September 2021, these treatments are commonly used:</p> <ol style="list-style-type: none"> <li><b>Chemotherapy:</b> The most commonly used first-line chemotherapy for metastatic head and neck cancer is a platinum-based drug, such as cisplatin or carboplatin, often given in combination with 5-fluorouracil (5-FU).</li> <li><b>Targeted Therapy:</b> Cetuximab (Erbix), a type of targeted therapy known as a monoclonal antibody, is often used in combination with chemotherapy. Cetuximab works by targeting the epidermal growth factor receptor (EGFR), which is overexpressed in many cases of head and neck cancer.</li> <li><b>Immunotherapy:</b> Pembrolizumab (Keytruda) or nivolumab (Opdivo), drugs known as immune checkpoint inhibitors, have been approved as first-line treatments for patients with metastatic head and neck squamous cell carcinoma that expresses the PD-L1 protein, or for patients who aren't eligible for cisplatin-based chemotherapy.</li> </ol> <p>The choice of treatment should be individualized based on the characteristics of the patient and the tumor, the potential benefits and side effects of treatment, and the patient's personal preferences. It's important to have these discussions with the healthcare provider to make the most appropriate treatment decisions.</p> <p>Please note that my knowledge is current only up to September 2021, and there may have been advancements or new findings since then. Always consult with a healthcare provider for the most current information.</p> |
|------------|-----------------------------------------------------------------------------------------------------------------------------------------------------------------------------------------------------------------------------------------------------------------------------------------------------------------------------------------------------------------------------------------------------------------------------------------------------------------------------------------------------------------------------------------------------------------------------------------------------------------------------------------------------------------------------------------------------------------------------------------------------------------------------------------------------------------------------------------------------------------------------------------------------------------------------------------------------------------------------------------------------------------------------------------------------------------------------------------------------------------------------------------------------------------------------------------------------------------------------------------------------------------------------------------------------------------------------------------------------------------------------------------------------------------------------------------------------------------------------------------------------------------------------------------------------------------------------------------------------------------------------------------------------------------------------------------------------------------------------------------------------------------------------------------------------------------------------------------------------------------------------------------------------------------------------------------------------------------------------------------------------------------------------------------------------------------------------------------------------------------------------------------------------------------------------------------------------------------------------------------------------------------------------------------------------------------------------------------------------------------------------------|------------------------------------------------------------------------------------------------------------------------------------------------------------------------------------------------------------------------------------------------------------------------------------------------------------------------------------------------------------------------------------------------------------------------------------------------------------------------------------------------------------------------------------------------------------------------------------------------------------------------------------------------------------------------------------------------------------------------------------------------------------------------------------------------------------------------------------------------------------------------------------------------------------------------------------------------------------------------------------------------------------------------------------------------------------------------------------------------------------------------------------------------------------------------------------------------------------------------------------------------------------------------------------------------------------------------------------------------------------------------------------------------------------------------------------------------------------------------------------------------------------------------------------------------------------------------------------------------------------------------------------------------------------------------------------------------------------------------------------------------------------------------------------------------------------------------------------------------------------------------------------------------------------------------------------------------------------------------------------------------------------------------------------------------------------------------------------------------------------------------------------------------------------------------------------------------------------------------------------------------------------------|-------------------------------------------------------------------------------------------------------------------------------------------------------------------------------------------------------------------------------------------------------------------------------------------------------------------------------------------------------------------------------------------------------------------------------------------------------------------------------------------------------------------------------------------------------------------------------------------------------------------------------------------------------------------------------------------------------------------------------------------------------------------------------------------------------------------------------------------------------------------------------------------------------------------------------------------------------------------------------------------------------------------------------------------------------------------------------------------------------------------------------------------------------------------------------------------------------------------------------------------------------------------------------------------------------------------------------------------------------------------------------------------------------------------------------------------------------------------------------------------------------------------------------------------------------------------------------------------------------------------------------------------------------------------------------------------------------------------------------------------------------------------------------------------------------------------------------------------------------------------------------------------------------|

|                   |                                                                                                                                                                                                                                                                                                                                                                                                                                                                                                                                                                                                                                                                                                                                                                                                                                                                                                                                                                                                                                                                                                                                                                                                                                                                                                                                                                                                                                                                                                                                                                                                                                                                                                                                                                                                                                                                                                                                                                                                                                                                             |                                                                                                                                                                                                                                                                                                                                                                                                                                                                                                                                                                                                                                                                                                                                                                                                                                                                                                                                                                                                                                                                                                                                                                                                                                                                                                                                                                                                                                                                                                                                                                                                                                                                                                                                                                                                                                                                    |                                                                                                                                                                                                                                                                                                                                                                                                                                                                                                                                                                                                                                                                                                                                                                                                                                                                                                                                                                                                                                                                                                                                                                                                                                                                                                                                                                                                                                                                                                                                                                                                                                                                                                                                                                                                                                                                        |
|-------------------|-----------------------------------------------------------------------------------------------------------------------------------------------------------------------------------------------------------------------------------------------------------------------------------------------------------------------------------------------------------------------------------------------------------------------------------------------------------------------------------------------------------------------------------------------------------------------------------------------------------------------------------------------------------------------------------------------------------------------------------------------------------------------------------------------------------------------------------------------------------------------------------------------------------------------------------------------------------------------------------------------------------------------------------------------------------------------------------------------------------------------------------------------------------------------------------------------------------------------------------------------------------------------------------------------------------------------------------------------------------------------------------------------------------------------------------------------------------------------------------------------------------------------------------------------------------------------------------------------------------------------------------------------------------------------------------------------------------------------------------------------------------------------------------------------------------------------------------------------------------------------------------------------------------------------------------------------------------------------------------------------------------------------------------------------------------------------------|--------------------------------------------------------------------------------------------------------------------------------------------------------------------------------------------------------------------------------------------------------------------------------------------------------------------------------------------------------------------------------------------------------------------------------------------------------------------------------------------------------------------------------------------------------------------------------------------------------------------------------------------------------------------------------------------------------------------------------------------------------------------------------------------------------------------------------------------------------------------------------------------------------------------------------------------------------------------------------------------------------------------------------------------------------------------------------------------------------------------------------------------------------------------------------------------------------------------------------------------------------------------------------------------------------------------------------------------------------------------------------------------------------------------------------------------------------------------------------------------------------------------------------------------------------------------------------------------------------------------------------------------------------------------------------------------------------------------------------------------------------------------------------------------------------------------------------------------------------------------|------------------------------------------------------------------------------------------------------------------------------------------------------------------------------------------------------------------------------------------------------------------------------------------------------------------------------------------------------------------------------------------------------------------------------------------------------------------------------------------------------------------------------------------------------------------------------------------------------------------------------------------------------------------------------------------------------------------------------------------------------------------------------------------------------------------------------------------------------------------------------------------------------------------------------------------------------------------------------------------------------------------------------------------------------------------------------------------------------------------------------------------------------------------------------------------------------------------------------------------------------------------------------------------------------------------------------------------------------------------------------------------------------------------------------------------------------------------------------------------------------------------------------------------------------------------------------------------------------------------------------------------------------------------------------------------------------------------------------------------------------------------------------------------------------------------------------------------------------------------------|
| <p><b>Q19</b></p> | <p>Cutaneous squamous cell carcinoma (cSCC) is often treated with surgery or radiation therapy when it is localized. However, in cases where the disease has spread (metastasized) or if it cannot be treated with surgery or radiation for some other reason, systemic treatments may be used.</p> <p>As of my last training data in September 2021, the following systemic treatments are commonly used:</p> <ol style="list-style-type: none"> <li><b>Chemotherapy:</b> Traditional chemotherapy drugs, such as cisplatin, 5-fluorouracil, or doxorubicin, may be used in some cases. However, the side effects of these medications can be significant, and they are often reserved for cases where other treatment options are not effective or suitable.</li> <li><b>Targeted Therapy:</b> If the tumor has specific genetic mutations, targeted therapies may be an option. For example, inhibitors of the epidermal growth factor receptor (EGFR), such as cetuximab, can be used in some cases.</li> <li><b>Immunotherapy:</b> Immune checkpoint inhibitors, such as pembrolizumab (Keytruda) or cemiplimab (Libtayo), have shown effectiveness in treating advanced cSCC. Cemiplimab is specifically approved by the FDA for the treatment of patients with metastatic or locally advanced cSCC who are not candidates for curative surgery or curative radiation. These drugs work by helping the immune system recognize and attack the cancer cells.</li> </ol> <p>The choice of systemic therapy depends on many factors, including the patient's overall health, the specific characteristics of the cancer, and the patient's personal preferences. It's important to have a detailed discussion with the healthcare provider about the potential benefits and side effects of each treatment option.</p> <p>Please note that this information is current as of my last update in September 2021, and new treatments or strategies may have emerged since then. Always consult with a healthcare provider for the most current and personalized advice.</p> | <p>As of my last training cut-off in September 2021, if cutaneous squamous cell carcinoma (cSCC) cannot be managed with surgery or radiotherapy, systemic therapy may be recommended. This is often the case in advanced or metastatic disease, or for patients who are not suitable candidates for surgery or radiotherapy.</p> <p>In this scenario, options for systemic treatment include:</p> <ol style="list-style-type: none"> <li><b>Chemotherapy:</b> Drugs such as cisplatin, 5-fluorouracil (5-FU), or a combination of these may be used.</li> <li><b>Targeted Therapy:</b> Certain drugs target specific proteins or pathways that help cancer cells grow and survive. Cetuximab (Erbix), a monoclonal antibody that targets the epidermal growth factor receptor (EGFR), has been used in the treatment of advanced cSCC.</li> <li><b>Immunotherapy:</b> This approach uses medications to help the patient's immune system recognize and fight the cancer. The PD-1 inhibitor cemiplimab (Libtayo) is FDA-approved for the treatment of patients with metastatic cSCC or locally advanced cSCC who are not candidates for curative surgery or curative radiation. Another PD-1 inhibitor, pembrolizumab (Keytruda), is also being studied in this context.</li> </ol> <p>The choice of systemic treatment depends on several factors, including the specific characteristics of the cancer, the patient's overall health, potential side effects, and the patient's personal preferences. It's important for patients to discuss these options with their healthcare provider to determine the most appropriate treatment plan.</p> <p>Please note that this information was current as of September 2021, and more recent advances may have occurred since then. Always consult with a healthcare provider for the most up-to-date information.</p> | <p>If cutaneous squamous-cell carcinoma (cSCC) cannot be treated with surgery or radiotherapy, for instance in cases where the disease has spread (metastasized) or where the patient isn't suitable for these treatments, systemic therapies can be used. These treatments can reach cancer cells almost anywhere in the body.</p> <p>As of my knowledge cut-off in September 2021, common systemic treatments for advanced cSCC include:</p> <ol style="list-style-type: none"> <li><b>Chemotherapy:</b> Traditional chemotherapy drugs such as cisplatin, carboplatin, or 5-fluorouracil (5-FU) may be used. Chemotherapy has been a mainstay of treatment for many cancers, but it may come with substantial side effects.</li> <li><b>Targeted Therapies:</b> Some patients might be eligible for targeted therapies, such as epidermal growth factor receptor (EGFR) inhibitors (for instance, cetuximab).</li> <li><b>Immunotherapy:</b> This has become an increasingly important treatment option for advanced cSCC. Cemiplimab (Libtayo) is an immune checkpoint inhibitor that targets the PD-1 pathway. It has been specifically approved by the FDA for the treatment of patients with metastatic or locally advanced cSCC who are not candidates for curative surgery or curative radiation.</li> </ol> <p>The choice of treatment depends on various factors including the extent of the cancer, the patient's overall health, potential side effects, and the patient's personal preferences. Therefore, it is crucial to have a comprehensive discussion with the healthcare provider to determine the best treatment plan.</p> <p>Remember that this information is up-to-date as of September 2021, and newer treatments or guidelines may have emerged since then. Always consult with a healthcare provider for the most current information.</p> |
|-------------------|-----------------------------------------------------------------------------------------------------------------------------------------------------------------------------------------------------------------------------------------------------------------------------------------------------------------------------------------------------------------------------------------------------------------------------------------------------------------------------------------------------------------------------------------------------------------------------------------------------------------------------------------------------------------------------------------------------------------------------------------------------------------------------------------------------------------------------------------------------------------------------------------------------------------------------------------------------------------------------------------------------------------------------------------------------------------------------------------------------------------------------------------------------------------------------------------------------------------------------------------------------------------------------------------------------------------------------------------------------------------------------------------------------------------------------------------------------------------------------------------------------------------------------------------------------------------------------------------------------------------------------------------------------------------------------------------------------------------------------------------------------------------------------------------------------------------------------------------------------------------------------------------------------------------------------------------------------------------------------------------------------------------------------------------------------------------------------|--------------------------------------------------------------------------------------------------------------------------------------------------------------------------------------------------------------------------------------------------------------------------------------------------------------------------------------------------------------------------------------------------------------------------------------------------------------------------------------------------------------------------------------------------------------------------------------------------------------------------------------------------------------------------------------------------------------------------------------------------------------------------------------------------------------------------------------------------------------------------------------------------------------------------------------------------------------------------------------------------------------------------------------------------------------------------------------------------------------------------------------------------------------------------------------------------------------------------------------------------------------------------------------------------------------------------------------------------------------------------------------------------------------------------------------------------------------------------------------------------------------------------------------------------------------------------------------------------------------------------------------------------------------------------------------------------------------------------------------------------------------------------------------------------------------------------------------------------------------------|------------------------------------------------------------------------------------------------------------------------------------------------------------------------------------------------------------------------------------------------------------------------------------------------------------------------------------------------------------------------------------------------------------------------------------------------------------------------------------------------------------------------------------------------------------------------------------------------------------------------------------------------------------------------------------------------------------------------------------------------------------------------------------------------------------------------------------------------------------------------------------------------------------------------------------------------------------------------------------------------------------------------------------------------------------------------------------------------------------------------------------------------------------------------------------------------------------------------------------------------------------------------------------------------------------------------------------------------------------------------------------------------------------------------------------------------------------------------------------------------------------------------------------------------------------------------------------------------------------------------------------------------------------------------------------------------------------------------------------------------------------------------------------------------------------------------------------------------------------------------|



|                   |                                                                                                                                                                                                                                                                                                                                                                                                                                                                                                                                                                                                                                                                                                                                                                                                                                                                                                                                                                                                                                                                                                                                                                                                                                                                                                                                                                                                                                                                                                                                                                                                                                                                                                 |                                                                                                                                                                                                                                                                                                                                                                                                                                                                                                                                                                                                                                                                                                                                                                                                                                                                                                                                                                                                                                                                                                                                                                                                                                                                                                                                                                                                                                                                                                                                                                                                                                                                                                                                                               |                                                                                                                                                                                                                                                                                                                                                                                                                                                                                                                                                                                                                                                                                                                                                                                                                                                                                                                                                                                                                                                                                                                                                                                                                                                                                                                                                                                                                                               |
|-------------------|-------------------------------------------------------------------------------------------------------------------------------------------------------------------------------------------------------------------------------------------------------------------------------------------------------------------------------------------------------------------------------------------------------------------------------------------------------------------------------------------------------------------------------------------------------------------------------------------------------------------------------------------------------------------------------------------------------------------------------------------------------------------------------------------------------------------------------------------------------------------------------------------------------------------------------------------------------------------------------------------------------------------------------------------------------------------------------------------------------------------------------------------------------------------------------------------------------------------------------------------------------------------------------------------------------------------------------------------------------------------------------------------------------------------------------------------------------------------------------------------------------------------------------------------------------------------------------------------------------------------------------------------------------------------------------------------------|---------------------------------------------------------------------------------------------------------------------------------------------------------------------------------------------------------------------------------------------------------------------------------------------------------------------------------------------------------------------------------------------------------------------------------------------------------------------------------------------------------------------------------------------------------------------------------------------------------------------------------------------------------------------------------------------------------------------------------------------------------------------------------------------------------------------------------------------------------------------------------------------------------------------------------------------------------------------------------------------------------------------------------------------------------------------------------------------------------------------------------------------------------------------------------------------------------------------------------------------------------------------------------------------------------------------------------------------------------------------------------------------------------------------------------------------------------------------------------------------------------------------------------------------------------------------------------------------------------------------------------------------------------------------------------------------------------------------------------------------------------------|-----------------------------------------------------------------------------------------------------------------------------------------------------------------------------------------------------------------------------------------------------------------------------------------------------------------------------------------------------------------------------------------------------------------------------------------------------------------------------------------------------------------------------------------------------------------------------------------------------------------------------------------------------------------------------------------------------------------------------------------------------------------------------------------------------------------------------------------------------------------------------------------------------------------------------------------------------------------------------------------------------------------------------------------------------------------------------------------------------------------------------------------------------------------------------------------------------------------------------------------------------------------------------------------------------------------------------------------------------------------------------------------------------------------------------------------------|
| <p><b>Q20</b></p> | <p>As of my last training data in September 2021, for patients with metastatic non-small cell lung cancer (NSCLC) that tests positive for programmed death-ligand 1 (PD-L1) but does not have a specific actionable mutation (like EGFR, ALK, ROS1, etc.), immunotherapy is often recommended as the first-line treatment.</p> <p>Specifically, immune checkpoint inhibitors that target the PD-1/PD-L1 pathway, such as pembrolizumab (Keytruda), have been shown to be effective in this group of patients. Pembrolizumab as a monotherapy is approved as a first-line treatment for patients with NSCLC whose tumors have high PD-L1 expression (tumor proportion score [TPS] of 50% or more) with no EGFR or ALK genomic tumor aberrations.</p> <p>Moreover, combination therapies can be considered. For example, for patients with lower PD-L1 expression (TPS 1-49%) or even those with high PD-L1 expression, pembrolizumab can also be given in combination with chemotherapy (typically platinum-based doublet chemotherapy). The use of the immune checkpoint inhibitor atezolizumab (Tecentriq) combined with chemotherapy is another option in this setting.</p> <p>Keep in mind that the decision on the best first-line treatment should be individualized based on various factors, including the patient's overall health status, potential side effects, personal preferences, and more.</p> <p>This information is based on the guidelines and research available as of September 2021. Therefore, you should always consult with a healthcare provider for the most current and personalized advice, as treatment options can change as new research becomes available.</p> | <p>As of my last update in September 2021, the first-line treatment for patients with metastatic non-small cell lung cancer (NSCLC) that is PD-L1 positive (meaning that the cancer cells express the PD-L1 protein) but does not have an actionable mutation (such as EGFR, ALK, ROS1, etc.) is often immunotherapy.</p> <p>More specifically, the immune checkpoint inhibitor pembrolizumab (Keytruda) is usually the first-line treatment for these patients. Pembrolizumab targets the PD-1 protein on immune cells, helping them to attack cancer cells. The FDA has approved pembrolizumab as a first-line treatment for patients with NSCLC whose tumors express PD-L1 in 50% or more of their cells and who do not have EGFR or ALK gene mutations.</p> <p>In certain cases, pembrolizumab may be used in combination with chemotherapy, even for those with high PD-L1 expression. For those with lower PD-L1 expression (1-49%), a combination of pembrolizumab and chemotherapy may be recommended as a first-line treatment.</p> <p>Another approved first-line treatment option for patients with PD-L1 positive metastatic NSCLC without an actionable mutation is atezolizumab (Tecentriq) in combination with chemotherapy.</p> <p>The best treatment for any individual patient depends on a variety of factors, including the patient's overall health, the specifics of their cancer, and their personal preferences. Therefore, it's important for patients to discuss these options with their healthcare provider.</p> <p>Please note that this information was current as of September 2021, and more recent advances may have occurred since then. Always consult with a healthcare provider for the most up-to-date information.</p> | <p>As of my training data up until September 2021, the first-line treatment for metastatic PD-L1 positive non-small cell lung cancer (NSCLC) without actionable mutations like EGFR, ALK, ROS1, etc., often involves immunotherapy.</p> <p>Specifically, the immune checkpoint inhibitor pembrolizumab (Keytruda) is frequently used as a first-line treatment in these cases. Pembrolizumab is approved for patients with NSCLC whose tumors have a high PD-L1 expression (a tumor proportion score [TPS] of 50% or more) and no EGFR or ALK genomic tumor aberrations.</p> <p>Furthermore, combination therapy is also an option, especially for patients with lower PD-L1 expression (TPS 1-49%). This typically involves the combination of pembrolizumab with chemotherapy. Another immunotherapy option is atezolizumab (Tecentriq) in combination with chemotherapy.</p> <p>The choice of treatment should be individualized based on the patient's overall health, potential side effects, and other factors. It's essential for patients to discuss these considerations with their healthcare provider to make the best possible treatment decision.</p> <p>Please note that the information provided is based on the guidelines and evidence available up until September 2021, and newer treatments or guidelines may have been introduced since then. Always consult a healthcare provider for the most current information.</p> |
|-------------------|-------------------------------------------------------------------------------------------------------------------------------------------------------------------------------------------------------------------------------------------------------------------------------------------------------------------------------------------------------------------------------------------------------------------------------------------------------------------------------------------------------------------------------------------------------------------------------------------------------------------------------------------------------------------------------------------------------------------------------------------------------------------------------------------------------------------------------------------------------------------------------------------------------------------------------------------------------------------------------------------------------------------------------------------------------------------------------------------------------------------------------------------------------------------------------------------------------------------------------------------------------------------------------------------------------------------------------------------------------------------------------------------------------------------------------------------------------------------------------------------------------------------------------------------------------------------------------------------------------------------------------------------------------------------------------------------------|---------------------------------------------------------------------------------------------------------------------------------------------------------------------------------------------------------------------------------------------------------------------------------------------------------------------------------------------------------------------------------------------------------------------------------------------------------------------------------------------------------------------------------------------------------------------------------------------------------------------------------------------------------------------------------------------------------------------------------------------------------------------------------------------------------------------------------------------------------------------------------------------------------------------------------------------------------------------------------------------------------------------------------------------------------------------------------------------------------------------------------------------------------------------------------------------------------------------------------------------------------------------------------------------------------------------------------------------------------------------------------------------------------------------------------------------------------------------------------------------------------------------------------------------------------------------------------------------------------------------------------------------------------------------------------------------------------------------------------------------------------------|-----------------------------------------------------------------------------------------------------------------------------------------------------------------------------------------------------------------------------------------------------------------------------------------------------------------------------------------------------------------------------------------------------------------------------------------------------------------------------------------------------------------------------------------------------------------------------------------------------------------------------------------------------------------------------------------------------------------------------------------------------------------------------------------------------------------------------------------------------------------------------------------------------------------------------------------------------------------------------------------------------------------------------------------------------------------------------------------------------------------------------------------------------------------------------------------------------------------------------------------------------------------------------------------------------------------------------------------------------------------------------------------------------------------------------------------------|

|            |                                                                                                                                                                                                                                                                                                                                                                                                                                                                                                                                                                                                                                                                                                                                                                                                                                                                                                                                                                                                                                                                                                                                                                                                                                                                                                                                                                                                                                                                                                                                                                                                                                                                                                                                                                                                                                                                                                                           |                                                                                                                                                                                                                                                                                                                                                                                                                                                                                                                                                                                                                                                                                                                                                                                                                                                                                                                                                                                                                                                                                                                                                                                                                                                                                                                                                                                                                                                                                                                                                                                                                                                                                                                                                                                                                                                                                                                                                                                   |                                                                                                                                                                                                                                                                                                                                                                                                                                                                                                                                                                                                                                                                                                                                                                                                                                                                                                                                                                                                                                                                                                                                                                                                                                                                                                                                                                                                                                                                                                                                                                                                                                 |
|------------|---------------------------------------------------------------------------------------------------------------------------------------------------------------------------------------------------------------------------------------------------------------------------------------------------------------------------------------------------------------------------------------------------------------------------------------------------------------------------------------------------------------------------------------------------------------------------------------------------------------------------------------------------------------------------------------------------------------------------------------------------------------------------------------------------------------------------------------------------------------------------------------------------------------------------------------------------------------------------------------------------------------------------------------------------------------------------------------------------------------------------------------------------------------------------------------------------------------------------------------------------------------------------------------------------------------------------------------------------------------------------------------------------------------------------------------------------------------------------------------------------------------------------------------------------------------------------------------------------------------------------------------------------------------------------------------------------------------------------------------------------------------------------------------------------------------------------------------------------------------------------------------------------------------------------|-----------------------------------------------------------------------------------------------------------------------------------------------------------------------------------------------------------------------------------------------------------------------------------------------------------------------------------------------------------------------------------------------------------------------------------------------------------------------------------------------------------------------------------------------------------------------------------------------------------------------------------------------------------------------------------------------------------------------------------------------------------------------------------------------------------------------------------------------------------------------------------------------------------------------------------------------------------------------------------------------------------------------------------------------------------------------------------------------------------------------------------------------------------------------------------------------------------------------------------------------------------------------------------------------------------------------------------------------------------------------------------------------------------------------------------------------------------------------------------------------------------------------------------------------------------------------------------------------------------------------------------------------------------------------------------------------------------------------------------------------------------------------------------------------------------------------------------------------------------------------------------------------------------------------------------------------------------------------------------|---------------------------------------------------------------------------------------------------------------------------------------------------------------------------------------------------------------------------------------------------------------------------------------------------------------------------------------------------------------------------------------------------------------------------------------------------------------------------------------------------------------------------------------------------------------------------------------------------------------------------------------------------------------------------------------------------------------------------------------------------------------------------------------------------------------------------------------------------------------------------------------------------------------------------------------------------------------------------------------------------------------------------------------------------------------------------------------------------------------------------------------------------------------------------------------------------------------------------------------------------------------------------------------------------------------------------------------------------------------------------------------------------------------------------------------------------------------------------------------------------------------------------------------------------------------------------------------------------------------------------------|
| <p>Q21</p> | <p>As of my last training cut-off in September 2021, there is growing interest and research in using immunotherapy in the neoadjuvant setting — that is, before surgery — for melanoma.</p> <p>The rationale for neoadjuvant immunotherapy is to stimulate an immune response against the tumor that can reduce tumor size before surgery, potentially improving surgical outcomes. It can also provide early information about how the tumor responds to the treatment, which can help guide further management.</p> <p>In recent years, several clinical trials have been conducted to explore this approach, and some results have been promising. For example, a study published in Nature Medicine in 2020 found that neoadjuvant therapy with the combination of ipilimumab and nivolumab led to a high response rate in patients with high-risk resectable melanoma. Importantly, neoadjuvant therapy was associated with improved relapse-free survival compared to adjuvant (post-surgery) therapy in this study.</p> <p>However, it's important to note that these are preliminary findings and more research is needed to confirm these results and to determine the best ways to use neoadjuvant immunotherapy in clinical practice. For instance, it's still not clear which patients are most likely to benefit from this approach, or what the best timing and sequence of therapies should be.</p> <p>Furthermore, while these treatments can be effective, they can also have significant side effects, and it's important to consider the potential risks and benefits for each individual patient.</p> <p>Given the rapidly evolving nature of this field, you should consult with a healthcare provider for the most up-to-date information. Always discuss treatment options and potential risks and benefits with a healthcare professional before making any decisions about cancer treatment.</p> | <p>The use of immunotherapy in the pre-surgical, or neoadjuvant, setting for melanoma is a topic of active research. Some studies have suggested potential benefits of this approach.</p> <p>The main rationale behind using neoadjuvant immunotherapy is to potentially reduce the size and extent of the tumor before surgery, which may make the surgery less extensive and more likely to be curative. It also allows clinicians to evaluate the effectiveness of the systemic treatment early on and possibly enhance the body's immune response to the cancer.</p> <p>As of my last training data in September 2021, several studies have shown promising results with the use of neoadjuvant immunotherapy in melanoma. For instance, checkpoint inhibitors, such as ipilimumab (a CTLA-4 inhibitor) and nivolumab (a PD-1 inhibitor), have been used in clinical trials in the neoadjuvant setting and have shown favorable responses in some patients.</p> <p>In one 2020 study published in Nature Medicine, patients with high-risk, resectable melanoma who received neoadjuvant ipilimumab plus nivolumab had significantly higher response rates and improved relapse-free survival compared to patients who received the same regimen after surgery (in the adjuvant setting).</p> <p>However, it's important to note that these treatments can also have significant side effects, and not all patients respond to these therapies. Therefore, the potential benefits of neoadjuvant immunotherapy must be weighed against the potential risks. It is also still an area of active investigation, and more research is needed to further understand the full benefits, optimal timing, and duration, and to identify which patients are most likely to benefit from this approach.</p> <p>Please consult a healthcare provider for the most recent and personalized advice, as the medical landscape may have changed after my last update in September 2021.</p> | <p>As of my training data cut-off in September 2021, there is a growing body of research suggesting that neoadjuvant immunotherapy — giving immunotherapy before surgery — may improve outcomes for some patients with melanoma.</p> <p>Clinical trials have shown that neoadjuvant immunotherapy can reduce tumor size, making the surgery easier and potentially more successful. Additionally, there is evidence to suggest that this approach might stimulate a stronger and broader immune response that can help to destroy any remaining cancer cells after surgery.</p> <p>A study published in 2020 in the journal Nature Medicine found that for patients with high-risk resectable melanoma, neoadjuvant therapy with a combination of the immunotherapies nivolumab and ipilimumab resulted in better outcomes compared to adjuvant therapy (therapy given after surgery).</p> <p>However, the use of immunotherapy in the neoadjuvant setting is still under investigation, and it's not yet clear which patients are most likely to benefit, or exactly how these treatments should be used in terms of timing, sequence, and combination with other therapies. Moreover, immunotherapies can have serious side effects, which must be carefully managed.</p> <p>It's also important to remember that the field of cancer immunotherapy is advancing quickly, and more recent studies may provide additional insights. Therefore, it's crucial for patients to discuss the potential risks and benefits with their healthcare provider and consider the most recent research when making treatment decisions.</p> |
|------------|---------------------------------------------------------------------------------------------------------------------------------------------------------------------------------------------------------------------------------------------------------------------------------------------------------------------------------------------------------------------------------------------------------------------------------------------------------------------------------------------------------------------------------------------------------------------------------------------------------------------------------------------------------------------------------------------------------------------------------------------------------------------------------------------------------------------------------------------------------------------------------------------------------------------------------------------------------------------------------------------------------------------------------------------------------------------------------------------------------------------------------------------------------------------------------------------------------------------------------------------------------------------------------------------------------------------------------------------------------------------------------------------------------------------------------------------------------------------------------------------------------------------------------------------------------------------------------------------------------------------------------------------------------------------------------------------------------------------------------------------------------------------------------------------------------------------------------------------------------------------------------------------------------------------------|-----------------------------------------------------------------------------------------------------------------------------------------------------------------------------------------------------------------------------------------------------------------------------------------------------------------------------------------------------------------------------------------------------------------------------------------------------------------------------------------------------------------------------------------------------------------------------------------------------------------------------------------------------------------------------------------------------------------------------------------------------------------------------------------------------------------------------------------------------------------------------------------------------------------------------------------------------------------------------------------------------------------------------------------------------------------------------------------------------------------------------------------------------------------------------------------------------------------------------------------------------------------------------------------------------------------------------------------------------------------------------------------------------------------------------------------------------------------------------------------------------------------------------------------------------------------------------------------------------------------------------------------------------------------------------------------------------------------------------------------------------------------------------------------------------------------------------------------------------------------------------------------------------------------------------------------------------------------------------------|---------------------------------------------------------------------------------------------------------------------------------------------------------------------------------------------------------------------------------------------------------------------------------------------------------------------------------------------------------------------------------------------------------------------------------------------------------------------------------------------------------------------------------------------------------------------------------------------------------------------------------------------------------------------------------------------------------------------------------------------------------------------------------------------------------------------------------------------------------------------------------------------------------------------------------------------------------------------------------------------------------------------------------------------------------------------------------------------------------------------------------------------------------------------------------------------------------------------------------------------------------------------------------------------------------------------------------------------------------------------------------------------------------------------------------------------------------------------------------------------------------------------------------------------------------------------------------------------------------------------------------|

|            |                                                                                                                                                                                                                                                                                                                                                                                                                                                                                                                                                                                                                                                                                                                                                                                                                                                                                                                                                                                                                                                                                                                                                                                                                                                                                                                                                                                                                                                                                                                                                                                                                                                                                                                                                                                                        |                                                                                                                                                                                                                                                                                                                                                                                                                                                                                                                                                                                                                                                                                                                                                                                                                                                                                                                                                                                                                                                                                                                                                                                                                                                                                                                                                                                                                      |                                                                                                                                                                                                                                                                                                                                                                                                                                                                                                                                                                                                                                                                                                                                                                                                                                                                                                                                                                                                                                                                                                                                                                                                                                                                                                                                                                     |
|------------|--------------------------------------------------------------------------------------------------------------------------------------------------------------------------------------------------------------------------------------------------------------------------------------------------------------------------------------------------------------------------------------------------------------------------------------------------------------------------------------------------------------------------------------------------------------------------------------------------------------------------------------------------------------------------------------------------------------------------------------------------------------------------------------------------------------------------------------------------------------------------------------------------------------------------------------------------------------------------------------------------------------------------------------------------------------------------------------------------------------------------------------------------------------------------------------------------------------------------------------------------------------------------------------------------------------------------------------------------------------------------------------------------------------------------------------------------------------------------------------------------------------------------------------------------------------------------------------------------------------------------------------------------------------------------------------------------------------------------------------------------------------------------------------------------------|----------------------------------------------------------------------------------------------------------------------------------------------------------------------------------------------------------------------------------------------------------------------------------------------------------------------------------------------------------------------------------------------------------------------------------------------------------------------------------------------------------------------------------------------------------------------------------------------------------------------------------------------------------------------------------------------------------------------------------------------------------------------------------------------------------------------------------------------------------------------------------------------------------------------------------------------------------------------------------------------------------------------------------------------------------------------------------------------------------------------------------------------------------------------------------------------------------------------------------------------------------------------------------------------------------------------------------------------------------------------------------------------------------------------|---------------------------------------------------------------------------------------------------------------------------------------------------------------------------------------------------------------------------------------------------------------------------------------------------------------------------------------------------------------------------------------------------------------------------------------------------------------------------------------------------------------------------------------------------------------------------------------------------------------------------------------------------------------------------------------------------------------------------------------------------------------------------------------------------------------------------------------------------------------------------------------------------------------------------------------------------------------------------------------------------------------------------------------------------------------------------------------------------------------------------------------------------------------------------------------------------------------------------------------------------------------------------------------------------------------------------------------------------------------------|
| <p>Q22</p> | <p>As of my last training cut-off in September 2021, targeted therapies, rather than immunotherapies, are the preferred first-line treatment for non-small cell lung cancer (NSCLC) with specific mutations or rearrangements such as epidermal growth factor receptor (EGFR) mutations or anaplastic lymphoma kinase (ALK) rearrangements.</p> <p>For EGFR mutations, EGFR tyrosine kinase inhibitors (TKIs) such as gefitinib (Iressa), erlotinib (Tarceva), afatinib (Gilotrif), osimertinib (Tagrisso), and dacomitinib (Vizimpro) are commonly used as the first line of treatment.</p> <p>For ALK rearrangements, ALK inhibitors such as crizotinib (Xalkori), ceritinib (Zykadia), alectinib (Alecensa), brigatinib (Alunbrig), and lorlatinib (Lorbrena) are often used as the first line of treatment.</p> <p>Immunotherapies, which leverage the body's immune system to fight cancer cells, have shown tremendous promise in the treatment of many cancers, including lung cancer. However, studies have shown that patients with NSCLC harboring EGFR mutations or ALK rearrangements may not respond as well to immunotherapy as those without these genetic changes.</p> <p>Nonetheless, immunotherapy may still be considered for these patients, especially in later lines of treatment, or if they have progressed on or cannot tolerate targeted therapies. The selection of treatment always depends on individual patient characteristics, the specifics of the cancer, and an ongoing discussion between the patient and their oncologist.</p> <p>Please note, this information is up-to-date as of my training data in September 2021. Always consult with a healthcare provider for the most current information, as treatment recommendations may have evolved since then.</p> | <p>As of my last training data in September 2021, evidence suggested that patients with non-small cell lung cancer (NSCLC) who have epidermal growth factor receptor (EGFR) mutations or anaplastic lymphoma kinase (ALK) fusions tend to have lower response rates to immunotherapies compared to those without these alterations.</p> <p>These types of lung cancers are often sensitive to targeted therapies known as tyrosine kinase inhibitors (TKIs). For EGFR-mutated NSCLC, EGFR inhibitors like erlotinib, gefitinib, afatinib, and osimertinib are typically used. For ALK-positive NSCLC, ALK inhibitors such as crizotinib, ceritinib, alectinib, and brigatinib are commonly employed.</p> <p>That being said, immunotherapies can still play a role in the treatment of these patients, particularly for those who have progressed on targeted therapies or in certain combinations. Clinical trials are ongoing to determine the optimal use of immunotherapy in patients with EGFR mutations or ALK rearrangements, including the potential use in combination with other therapies.</p> <p>It's also important to note that the field of cancer treatment is continually evolving, and new studies or treatments may have emerged since my last update. Therefore, it's crucial to consult with a healthcare provider or oncologist for the most up-to-date and personalized treatment advice.</p> | <p>As of my training data up until September 2021, patients with non-small cell lung cancer (NSCLC) that have specific mutations such as epidermal growth factor receptor (EGFR) or anaplastic lymphoma kinase (ALK) rearrangements typically respond better to targeted therapies rather than immunotherapy.</p> <p>For EGFR mutations, first-line treatment usually involves EGFR tyrosine kinase inhibitors (TKIs) such as erlotinib, gefitinib, afatinib, or osimertinib. Similarly, for ALK rearrangements, ALK inhibitors like crizotinib, ceritinib, alectinib, or brigatinib are typically used as first-line therapy.</p> <p>Studies have shown that NSCLC patients with these mutations do not tend to respond as well to immunotherapy as patients without these mutations. However, if the disease progresses on targeted therapies, or the patient can't tolerate them, immunotherapies may be considered.</p> <p>The decision of which treatment to use is complex and should be individualized for each patient, based on the specifics of their disease, their overall health, potential side effects, and their personal preferences.</p> <p>As this is a rapidly evolving field, the recommendations might have changed after my last update. It's always a good idea to consult with a healthcare provider for the most current information.</p> |
|------------|--------------------------------------------------------------------------------------------------------------------------------------------------------------------------------------------------------------------------------------------------------------------------------------------------------------------------------------------------------------------------------------------------------------------------------------------------------------------------------------------------------------------------------------------------------------------------------------------------------------------------------------------------------------------------------------------------------------------------------------------------------------------------------------------------------------------------------------------------------------------------------------------------------------------------------------------------------------------------------------------------------------------------------------------------------------------------------------------------------------------------------------------------------------------------------------------------------------------------------------------------------------------------------------------------------------------------------------------------------------------------------------------------------------------------------------------------------------------------------------------------------------------------------------------------------------------------------------------------------------------------------------------------------------------------------------------------------------------------------------------------------------------------------------------------------|----------------------------------------------------------------------------------------------------------------------------------------------------------------------------------------------------------------------------------------------------------------------------------------------------------------------------------------------------------------------------------------------------------------------------------------------------------------------------------------------------------------------------------------------------------------------------------------------------------------------------------------------------------------------------------------------------------------------------------------------------------------------------------------------------------------------------------------------------------------------------------------------------------------------------------------------------------------------------------------------------------------------------------------------------------------------------------------------------------------------------------------------------------------------------------------------------------------------------------------------------------------------------------------------------------------------------------------------------------------------------------------------------------------------|---------------------------------------------------------------------------------------------------------------------------------------------------------------------------------------------------------------------------------------------------------------------------------------------------------------------------------------------------------------------------------------------------------------------------------------------------------------------------------------------------------------------------------------------------------------------------------------------------------------------------------------------------------------------------------------------------------------------------------------------------------------------------------------------------------------------------------------------------------------------------------------------------------------------------------------------------------------------------------------------------------------------------------------------------------------------------------------------------------------------------------------------------------------------------------------------------------------------------------------------------------------------------------------------------------------------------------------------------------------------|

|            |                                                                                                                                                                                                                                                                                                                                                                                                                                                                                                                                                                                                                                                                                                                                                                                                                                                                                                                                                                                                                                                                                                                                                                                                                                                                                                                                                                                                                                                                                                                                                                                                                                                                                                                                                                                                                                                                                                                                                                                                                                                                                                                                                                                                         |                                                                                                                                                                                                                                                                                                                                                                                                                                                                                                                                                                                                                                                                                                                                                                                                                                                                                                                                                                                                                                                                                                                                                                                                                                                                                                                                                                                                                                                                                                                                                                                                                                                                                                                                                                                                                                                                                                                                                                                 |                                                                                                                                                                                                                                                                                                                                                                                                                                                                                                                                                                                                                                                                                                                                                                                                                                                                                                                                                                                                                                                                                                                                                                                                                                                                                                                                                                                                                                                                                                                                                                                                                         |
|------------|---------------------------------------------------------------------------------------------------------------------------------------------------------------------------------------------------------------------------------------------------------------------------------------------------------------------------------------------------------------------------------------------------------------------------------------------------------------------------------------------------------------------------------------------------------------------------------------------------------------------------------------------------------------------------------------------------------------------------------------------------------------------------------------------------------------------------------------------------------------------------------------------------------------------------------------------------------------------------------------------------------------------------------------------------------------------------------------------------------------------------------------------------------------------------------------------------------------------------------------------------------------------------------------------------------------------------------------------------------------------------------------------------------------------------------------------------------------------------------------------------------------------------------------------------------------------------------------------------------------------------------------------------------------------------------------------------------------------------------------------------------------------------------------------------------------------------------------------------------------------------------------------------------------------------------------------------------------------------------------------------------------------------------------------------------------------------------------------------------------------------------------------------------------------------------------------------------|---------------------------------------------------------------------------------------------------------------------------------------------------------------------------------------------------------------------------------------------------------------------------------------------------------------------------------------------------------------------------------------------------------------------------------------------------------------------------------------------------------------------------------------------------------------------------------------------------------------------------------------------------------------------------------------------------------------------------------------------------------------------------------------------------------------------------------------------------------------------------------------------------------------------------------------------------------------------------------------------------------------------------------------------------------------------------------------------------------------------------------------------------------------------------------------------------------------------------------------------------------------------------------------------------------------------------------------------------------------------------------------------------------------------------------------------------------------------------------------------------------------------------------------------------------------------------------------------------------------------------------------------------------------------------------------------------------------------------------------------------------------------------------------------------------------------------------------------------------------------------------------------------------------------------------------------------------------------------------|-------------------------------------------------------------------------------------------------------------------------------------------------------------------------------------------------------------------------------------------------------------------------------------------------------------------------------------------------------------------------------------------------------------------------------------------------------------------------------------------------------------------------------------------------------------------------------------------------------------------------------------------------------------------------------------------------------------------------------------------------------------------------------------------------------------------------------------------------------------------------------------------------------------------------------------------------------------------------------------------------------------------------------------------------------------------------------------------------------------------------------------------------------------------------------------------------------------------------------------------------------------------------------------------------------------------------------------------------------------------------------------------------------------------------------------------------------------------------------------------------------------------------------------------------------------------------------------------------------------------------|
| <p>Q23</p> | <p>Lynch syndrome is a hereditary condition that increases the risk of many types of cancer, particularly colorectal cancer, endometrial cancer, and others. It is caused by mutations in the mismatch repair (MMR) genes, which are involved in repairing mistakes that occur when DNA is copied during cell division. These mutations lead to an accumulation of DNA errors and increase the likelihood of developing cancer.</p> <p>Immunotherapies, particularly a group known as immune checkpoint inhibitors, have been shown to be effective in some cancers associated with Lynch syndrome. This is because the accumulation of DNA errors can lead to the formation of abnormal proteins on the surface of cancer cells. These abnormal proteins can be recognized by the immune system as foreign, and immune checkpoint inhibitors can enhance this immune response against the cancer cells.</p> <p>As of my last update in September 2021, one of the checkpoint inhibitors, pembrolizumab (Keytruda), has been approved by the U.S. FDA for the treatment of solid tumors that have certain characteristics, including those that are mismatch repair deficient (dMMR) or have high microsatellite instability (MSI-H), both of which are common in cancers associated with Lynch syndrome.</p> <p>While prostate cancer is not one of the cancers most commonly associated with Lynch syndrome, if your prostate cancer is found to be dMMR or MSI-H, then there could potentially be a role for immunotherapy like pembrolizumab.</p> <p>However, the specifics of your treatment would depend on many factors, including the stage and grade of your prostate cancer, your overall health, and your treatment preferences. Additionally, the medical landscape is continually changing with ongoing research and clinical trials, and new treatments may have been developed since my last update.</p> <p>Therefore, I would strongly encourage you to discuss this issue with your oncologist or another healthcare provider who is familiar with your situation. They can provide you with the most accurate and up-to-date information and help guide your treatment decisions.</p> | <p>Lynch syndrome is a genetic disorder that increases the risk of many types of cancer, particularly colorectal and endometrial cancers, but it also can increase the risk of several other cancers including prostate cancer. This syndrome involves mutations in genes responsible for DNA mismatch repair (MMR). As a result, people with Lynch syndrome accumulate more genetic mutations, a condition which is sometimes described as having a high microsatellite instability (MSI-H) or being mismatch repair deficient (dMMR).</p> <p>Immunotherapies, such as checkpoint inhibitors, have been found to be particularly effective against tumors that are MSI-H or dMMR. This is because these tumors have many mutations, which means they produce many abnormal proteins that can be targeted by the immune system.</p> <p>As of my last training cut-off in September 2021, the checkpoint inhibitor pembrolizumab (Keytruda) has been approved by the FDA for the treatment of solid tumors that are MSI-H or dMMR, regardless of where in the body the tumor originated. This approval is based on the idea that the genetic characteristics of the tumor (i.e., being MSI-H or dMMR) are more important than the location of the tumor in the body.</p> <p>In your case, if your prostate cancer is determined to be MSI-H or dMMR, then immunotherapy with a checkpoint inhibitor could potentially be a part of your treatment plan.</p> <p>However, the decision about whether to use immunotherapy and which one to use is complex and depends on many factors, including the specifics of your cancer, your overall health, the potential side effects, and your personal preferences. Please consult with your healthcare provider for a detailed discussion about your options. The field of cancer treatment continues to evolve quickly, so it's crucial to have these conversations with your healthcare provider to get the most current advice.</p> | <p>Lynch syndrome is an inherited disorder that increases the risk of many types of cancer, particularly colorectal cancer and endometrial cancer, but it can also increase the risk for other cancers like prostate cancer. It is associated with defects in mismatch repair (MMR) genes, which lead to an accumulation of DNA errors (mutations).</p> <p>As of my last training data cut-off in September 2021, there's evidence suggesting that tumors with mismatch repair deficiency (dMMR) or high microsatellite instability (MSI-H) — which are characteristic of Lynch syndrome — might be particularly responsive to certain kinds of immunotherapy, specifically immune checkpoint inhibitors.</p> <p>The U.S. FDA has approved pembrolizumab (Keytruda), an immune checkpoint inhibitor, for the treatment of solid tumors with specific genetic features, namely dMMR and MSI-H, regardless of the origin of the cancer. So if your prostate cancer has these features, it may be susceptible to treatment with this form of immunotherapy.</p> <p>However, the decision to use immunotherapy depends on many factors, including the specifics of your prostate cancer (e.g., stage, grade), your overall health, and other individual considerations. It's essential to discuss this with your treating oncologist who has access to your medical history and the latest research and clinical trials. Remember that the field of oncology is rapidly evolving, and more recent data might influence treatment decisions. Always consult with a healthcare provider for the most current information.</p> |
|------------|---------------------------------------------------------------------------------------------------------------------------------------------------------------------------------------------------------------------------------------------------------------------------------------------------------------------------------------------------------------------------------------------------------------------------------------------------------------------------------------------------------------------------------------------------------------------------------------------------------------------------------------------------------------------------------------------------------------------------------------------------------------------------------------------------------------------------------------------------------------------------------------------------------------------------------------------------------------------------------------------------------------------------------------------------------------------------------------------------------------------------------------------------------------------------------------------------------------------------------------------------------------------------------------------------------------------------------------------------------------------------------------------------------------------------------------------------------------------------------------------------------------------------------------------------------------------------------------------------------------------------------------------------------------------------------------------------------------------------------------------------------------------------------------------------------------------------------------------------------------------------------------------------------------------------------------------------------------------------------------------------------------------------------------------------------------------------------------------------------------------------------------------------------------------------------------------------------|---------------------------------------------------------------------------------------------------------------------------------------------------------------------------------------------------------------------------------------------------------------------------------------------------------------------------------------------------------------------------------------------------------------------------------------------------------------------------------------------------------------------------------------------------------------------------------------------------------------------------------------------------------------------------------------------------------------------------------------------------------------------------------------------------------------------------------------------------------------------------------------------------------------------------------------------------------------------------------------------------------------------------------------------------------------------------------------------------------------------------------------------------------------------------------------------------------------------------------------------------------------------------------------------------------------------------------------------------------------------------------------------------------------------------------------------------------------------------------------------------------------------------------------------------------------------------------------------------------------------------------------------------------------------------------------------------------------------------------------------------------------------------------------------------------------------------------------------------------------------------------------------------------------------------------------------------------------------------------|-------------------------------------------------------------------------------------------------------------------------------------------------------------------------------------------------------------------------------------------------------------------------------------------------------------------------------------------------------------------------------------------------------------------------------------------------------------------------------------------------------------------------------------------------------------------------------------------------------------------------------------------------------------------------------------------------------------------------------------------------------------------------------------------------------------------------------------------------------------------------------------------------------------------------------------------------------------------------------------------------------------------------------------------------------------------------------------------------------------------------------------------------------------------------------------------------------------------------------------------------------------------------------------------------------------------------------------------------------------------------------------------------------------------------------------------------------------------------------------------------------------------------------------------------------------------------------------------------------------------------|

|            |                                                                                                                                                                                                                                                                                                                                                                                                                                                                                                                                                                                                                                                                                                                                                                                                                                                                                                                                                                                                                                                                                                                                                                                                                                                                                                                                                                                                                                                                                                        |                                                                                                                                                                                                                                                                                                                                                                                                                                                                                                                                                                                                                                                                                                                                                                                                                                                                                                                                                                                                                                                                                                                                                                                                                                                                                                                                                                                                                                                                                                         |                                                                                                                                                                                                                                                                                                                                                                                                                                                                                                                                                                                                                                                                                                                                                                                                                                                                                                                                                                                                                                                                                                                                                                                                                                                                                                                                                                                                                                                                                                                           |
|------------|--------------------------------------------------------------------------------------------------------------------------------------------------------------------------------------------------------------------------------------------------------------------------------------------------------------------------------------------------------------------------------------------------------------------------------------------------------------------------------------------------------------------------------------------------------------------------------------------------------------------------------------------------------------------------------------------------------------------------------------------------------------------------------------------------------------------------------------------------------------------------------------------------------------------------------------------------------------------------------------------------------------------------------------------------------------------------------------------------------------------------------------------------------------------------------------------------------------------------------------------------------------------------------------------------------------------------------------------------------------------------------------------------------------------------------------------------------------------------------------------------------|---------------------------------------------------------------------------------------------------------------------------------------------------------------------------------------------------------------------------------------------------------------------------------------------------------------------------------------------------------------------------------------------------------------------------------------------------------------------------------------------------------------------------------------------------------------------------------------------------------------------------------------------------------------------------------------------------------------------------------------------------------------------------------------------------------------------------------------------------------------------------------------------------------------------------------------------------------------------------------------------------------------------------------------------------------------------------------------------------------------------------------------------------------------------------------------------------------------------------------------------------------------------------------------------------------------------------------------------------------------------------------------------------------------------------------------------------------------------------------------------------------|---------------------------------------------------------------------------------------------------------------------------------------------------------------------------------------------------------------------------------------------------------------------------------------------------------------------------------------------------------------------------------------------------------------------------------------------------------------------------------------------------------------------------------------------------------------------------------------------------------------------------------------------------------------------------------------------------------------------------------------------------------------------------------------------------------------------------------------------------------------------------------------------------------------------------------------------------------------------------------------------------------------------------------------------------------------------------------------------------------------------------------------------------------------------------------------------------------------------------------------------------------------------------------------------------------------------------------------------------------------------------------------------------------------------------------------------------------------------------------------------------------------------------|
| <p>Q24</p> | <p>As of my last update in September 2021, pembrolizumab, an immune checkpoint inhibitor, is not approved by the U.S. FDA for the treatment of multiple myeloma. Clinical trials studying the effectiveness of pembrolizumab in multiple myeloma did not show enough benefit to warrant FDA approval, and in some cases, trials were stopped due to concerns over safety and adverse effects.</p> <p>Multiple myeloma is typically treated with a combination of therapies that may include immunomodulatory drugs (such as lenalidomide or pomalidomide), proteasome inhibitors (such as bortezomib or carfilzomib), steroids, and sometimes chemotherapy. Autologous stem cell transplantation can also be considered in certain patients.</p> <p>There are also newer types of immunotherapy being studied and utilized in multiple myeloma, including CAR-T cell therapy. In fact, as of 2021, the CAR-T cell therapy idecabtagene vicleucel (Abecma) was approved by the FDA for use in multiple myeloma in patients who have received at least four prior lines of therapy, including an immunomodulatory agent, a proteasome inhibitor, and an anti-CD38 monoclonal antibody.</p> <p>However, the field of oncology is continuously evolving, and the specific choice of treatment depends on the patient's individual disease characteristics, overall health, and treatment preferences. Always consult with a healthcare provider for the most recent information and treatment options.</p> | <p>Pembrolizumab (Keytruda) is an immune checkpoint inhibitor that has shown promise in a variety of cancers by targeting the PD-1/PD-L1 pathway and enhancing the body's immune response against cancer cells. However, as of my last update in September 2021, it is not approved by the U.S. Food and Drug Administration (FDA) for the treatment of multiple myeloma.</p> <p>Some clinical trials have investigated the use of pembrolizumab in combination with other drugs for treating multiple myeloma, but they have had mixed results. For example, in July 2017, the FDA halted two clinical trials of pembrolizumab for multiple myeloma due to safety concerns. Specifically, these trials were exploring the combination of pembrolizumab with two other drugs commonly used to treat multiple myeloma: lenalidomide and pomalidomide. The concern was based on an excess of deaths in the pembrolizumab arms of these trials.</p> <p>However, the field of oncology is always evolving, with ongoing research and clinical trials potentially leading to new treatment approaches. Additionally, other forms of immunotherapy are being investigated for the treatment of multiple myeloma, including CAR-T cell therapy.</p> <p>Please consult with your healthcare provider or a specialist in multiple myeloma for the most current treatment options and strategies. They will be able to provide advice based on the latest medical evidence and your individual circumstances.</p> | <p>Pembrolizumab, also known as Keytruda, is an immune checkpoint inhibitor that works by blocking the PD-1 protein, thus helping the immune system fight cancer cells more effectively. It has been approved for use in several types of cancer.</p> <p>However, as of my knowledge cutoff in September 2021, the U.S. Food and Drug Administration (FDA) has not approved pembrolizumab for the treatment of multiple myeloma. There have been clinical trials studying its use in this disease, often in combination with other medications, but results have been mixed and some trials raised safety concerns. Therefore, the role of pembrolizumab in the treatment of multiple myeloma remains unclear and is a subject of ongoing research.</p> <p>Commonly used treatments for multiple myeloma include proteasome inhibitors (e.g., bortezomib), immunomodulatory drugs (e.g., lenalidomide), and steroids. In recent years, newer types of therapies, such as CAR-T cell therapies, have shown promise for treating multiple myeloma. As of 2021, the CAR-T cell therapy idecabtagene vicleucel (Abecma) was approved by the FDA for certain patients with relapsed or refractory multiple myeloma.</p> <p>Keep in mind that the field of cancer treatment is rapidly evolving, and new research or treatments may have emerged since my last update. Therefore, it's important to consult with a healthcare provider or oncologist for the most up-to-date information and personalized treatment advice.</p> |
|------------|--------------------------------------------------------------------------------------------------------------------------------------------------------------------------------------------------------------------------------------------------------------------------------------------------------------------------------------------------------------------------------------------------------------------------------------------------------------------------------------------------------------------------------------------------------------------------------------------------------------------------------------------------------------------------------------------------------------------------------------------------------------------------------------------------------------------------------------------------------------------------------------------------------------------------------------------------------------------------------------------------------------------------------------------------------------------------------------------------------------------------------------------------------------------------------------------------------------------------------------------------------------------------------------------------------------------------------------------------------------------------------------------------------------------------------------------------------------------------------------------------------|---------------------------------------------------------------------------------------------------------------------------------------------------------------------------------------------------------------------------------------------------------------------------------------------------------------------------------------------------------------------------------------------------------------------------------------------------------------------------------------------------------------------------------------------------------------------------------------------------------------------------------------------------------------------------------------------------------------------------------------------------------------------------------------------------------------------------------------------------------------------------------------------------------------------------------------------------------------------------------------------------------------------------------------------------------------------------------------------------------------------------------------------------------------------------------------------------------------------------------------------------------------------------------------------------------------------------------------------------------------------------------------------------------------------------------------------------------------------------------------------------------|---------------------------------------------------------------------------------------------------------------------------------------------------------------------------------------------------------------------------------------------------------------------------------------------------------------------------------------------------------------------------------------------------------------------------------------------------------------------------------------------------------------------------------------------------------------------------------------------------------------------------------------------------------------------------------------------------------------------------------------------------------------------------------------------------------------------------------------------------------------------------------------------------------------------------------------------------------------------------------------------------------------------------------------------------------------------------------------------------------------------------------------------------------------------------------------------------------------------------------------------------------------------------------------------------------------------------------------------------------------------------------------------------------------------------------------------------------------------------------------------------------------------------|

|                   |                                                                                                                                                                                                                                                                                                                                                                                                                                                                                                                                                                                                                                                                                                                                                                                                                                                                                                                                                                                                                                                                                                                                                                                                                                                                                                                                                                                                                                                                                                                                                                                                                                                                                                                                                                                                                                                                                                                                                                                                                                                                                                                                                                                                                              |                                                                                                                                                                                                                                                                                                                                                                                                                                                                                                                                                                                                                                                                                                                                                                                                                                                                                                                                                                                                                                                                                                                                                                                                                                                                                                                                                                                                                                                                                                                                                                                                                                                                                                                                                                                                                                                                                                                                                                                                                                                                                                                                                                                                                      |                                                                                                                                                                                                                                                                                                                                                                                                                                                                                                                                                                                                                                                                                                                                                                                                                                                                                                                                                                                                                                                                                                                                                                                                                                                                                                                                                                                                                                                                                                                                                                                                                                                                                                                                                                                                                                                                                                                                                                           |
|-------------------|------------------------------------------------------------------------------------------------------------------------------------------------------------------------------------------------------------------------------------------------------------------------------------------------------------------------------------------------------------------------------------------------------------------------------------------------------------------------------------------------------------------------------------------------------------------------------------------------------------------------------------------------------------------------------------------------------------------------------------------------------------------------------------------------------------------------------------------------------------------------------------------------------------------------------------------------------------------------------------------------------------------------------------------------------------------------------------------------------------------------------------------------------------------------------------------------------------------------------------------------------------------------------------------------------------------------------------------------------------------------------------------------------------------------------------------------------------------------------------------------------------------------------------------------------------------------------------------------------------------------------------------------------------------------------------------------------------------------------------------------------------------------------------------------------------------------------------------------------------------------------------------------------------------------------------------------------------------------------------------------------------------------------------------------------------------------------------------------------------------------------------------------------------------------------------------------------------------------------|----------------------------------------------------------------------------------------------------------------------------------------------------------------------------------------------------------------------------------------------------------------------------------------------------------------------------------------------------------------------------------------------------------------------------------------------------------------------------------------------------------------------------------------------------------------------------------------------------------------------------------------------------------------------------------------------------------------------------------------------------------------------------------------------------------------------------------------------------------------------------------------------------------------------------------------------------------------------------------------------------------------------------------------------------------------------------------------------------------------------------------------------------------------------------------------------------------------------------------------------------------------------------------------------------------------------------------------------------------------------------------------------------------------------------------------------------------------------------------------------------------------------------------------------------------------------------------------------------------------------------------------------------------------------------------------------------------------------------------------------------------------------------------------------------------------------------------------------------------------------------------------------------------------------------------------------------------------------------------------------------------------------------------------------------------------------------------------------------------------------------------------------------------------------------------------------------------------------|---------------------------------------------------------------------------------------------------------------------------------------------------------------------------------------------------------------------------------------------------------------------------------------------------------------------------------------------------------------------------------------------------------------------------------------------------------------------------------------------------------------------------------------------------------------------------------------------------------------------------------------------------------------------------------------------------------------------------------------------------------------------------------------------------------------------------------------------------------------------------------------------------------------------------------------------------------------------------------------------------------------------------------------------------------------------------------------------------------------------------------------------------------------------------------------------------------------------------------------------------------------------------------------------------------------------------------------------------------------------------------------------------------------------------------------------------------------------------------------------------------------------------------------------------------------------------------------------------------------------------------------------------------------------------------------------------------------------------------------------------------------------------------------------------------------------------------------------------------------------------------------------------------------------------------------------------------------------------|
| <p><b>Q25</b></p> | <p>Uveal melanoma, also known as ocular melanoma, is a rare cancer that arises from the melanocytes within the uvea, which is the middle layer of the wall of the eye. When uveal melanoma metastasizes, or spreads to other parts of the body, it becomes more difficult to treat.</p> <p>As of my last update in September 2021, treatment for metastatic uveal melanoma typically includes systemic therapy as local treatments are usually not enough to control the disease. Here are some of the systemic treatments that might be used:</p> <ol style="list-style-type: none"> <li><b>Chemotherapy</b>: Historically, chemotherapy has been used for metastatic uveal melanoma, but it has limited effectiveness.</li> <li><b>Targeted therapy</b>: Approximately 50% of uveal melanomas have mutations in the GNAQ or GNA11 genes. Drugs that target the effects of these mutations are being studied, and some patients may be eligible to receive these drugs as part of a clinical trial.</li> <li><b>Immunotherapy</b>: Immune checkpoint inhibitors, such as ipilimumab (Yervoy) and pembrolizumab (Keytruda), have been used to treat metastatic uveal melanoma, but the response rates tend to be lower than in cutaneous (skin) melanoma. Other immunotherapy approaches are also being studied in clinical trials.</li> <li><b>Liver-directed therapies</b>: If the cancer has spread predominantly to the liver, treatments such as hepatic arterial infusion chemotherapy, chemoembolization, or radioembolization may be considered.</li> </ol> <p>Patients with metastatic uveal melanoma should consider participating in clinical trials, as these trials provide access to the latest experimental therapies and contribute to the scientific understanding of this rare disease.</p> <p>Remember, the choice of treatment depends on many factors, including the patient's overall health, the locations of the metastases, and the patient's personal preferences. The treatment landscape in oncology is rapidly evolving, and the options available may have changed since my last update. Always consult with a healthcare provider for the most current information and treatment options.</p> | <p>Uveal melanoma, also known as ocular melanoma, is a rare type of cancer that arises from the melanocytes in the uvea, the middle layer of the eye. Metastatic uveal melanoma, which is cancer that has spread beyond the eye to other parts of the body, is challenging to treat.</p> <p>As of my last training cut-off in September 2021, here are some of the systemic treatment options for metastatic uveal melanoma:</p> <ol style="list-style-type: none"> <li><b>Chemotherapy</b>: Traditional chemotherapy drugs have had limited effectiveness against metastatic uveal melanoma, but they can still be used in some cases.</li> <li><b>Immunotherapy</b>: Immune checkpoint inhibitors, such as ipilimumab (Yervoy) and pembrolizumab (Keytruda), have been used with some success in treating cutaneous (skin) melanoma. However, their effectiveness in uveal melanoma appears to be lower.</li> <li><b>Targeted Therapy</b>: Some uveal melanomas have specific genetic mutations (GNAQ or GNA11), and therapies that specifically target these mutations are being studied.</li> <li><b>Clinical Trials</b>: Given the rarity and difficulty in treating metastatic uveal melanoma, clinical trials may offer the best chance for access to the latest experimental therapies. These could include new immunotherapies, targeted therapies, or combinations of therapies.</li> <li><b>Liver-directed therapies</b>: If the cancer has spread primarily to the liver, therapies specifically directed at the liver, such as hepatic arterial infusion chemotherapy, radioembolization, or chemoembolization, may be options.</li> </ol> <p>Please note, the most appropriate treatment can depend on several factors, including the specifics of the cancer, the patient's overall health and personal preferences, and the potential side effects of the treatment. The rapidly evolving nature of cancer treatments means there could be new therapies or approaches available beyond my knowledge cutoff in September 2021. As always, treatment decisions should be made in consultation with a healthcare provider who is up-to-date with the latest developments in treating this disease.</p> | <p>Uveal melanoma, also known as ocular melanoma, originates in the uvea of the eye. If the cancer metastasizes, or spreads to other parts of the body, it becomes significantly more difficult to treat.</p> <p>As of my training data cut-off in September 2021, the systemic treatment options for metastatic uveal melanoma include:</p> <ol style="list-style-type: none"> <li><b>Chemotherapy</b>: Traditional chemotherapy regimens have been used for metastatic uveal melanoma, but their effectiveness is often limited.</li> <li><b>Immunotherapy</b>: Immunotherapies, such as checkpoint inhibitors (ipilimumab, pembrolizumab, nivolumab), have shown success in treating other types of melanoma, but the response rates in uveal melanoma are lower.</li> <li><b>Targeted therapy</b>: Around half of all uveal melanomas harbor mutations in the GNAQ or GNA11 genes. Some targeted therapies aim to block the signaling pathways activated by these mutations, but as of 2021, these are mainly in experimental stages or clinical trials.</li> <li><b>Clinical trials</b>: Given the rarity and complexity of metastatic uveal melanoma, participation in clinical trials may offer access to new and potentially effective treatments.</li> <li><b>Liver-directed therapies</b>: If the cancer has primarily spread to the liver, treatments targeting the liver (such as hepatic artery infusion of chemotherapy, radioembolization, or chemoembolization) may be considered.</li> </ol> <p>Treatment choice is influenced by various factors, including the patient's overall health, genetic characteristics of the tumor, the extent of cancer spread, and other individual considerations.</p> <p>Please consult with your healthcare provider for the most current treatment options, as the field of oncology continues to evolve rapidly, and newer treatments may have been developed or approved since my last training update in 2021.</p> |
|-------------------|------------------------------------------------------------------------------------------------------------------------------------------------------------------------------------------------------------------------------------------------------------------------------------------------------------------------------------------------------------------------------------------------------------------------------------------------------------------------------------------------------------------------------------------------------------------------------------------------------------------------------------------------------------------------------------------------------------------------------------------------------------------------------------------------------------------------------------------------------------------------------------------------------------------------------------------------------------------------------------------------------------------------------------------------------------------------------------------------------------------------------------------------------------------------------------------------------------------------------------------------------------------------------------------------------------------------------------------------------------------------------------------------------------------------------------------------------------------------------------------------------------------------------------------------------------------------------------------------------------------------------------------------------------------------------------------------------------------------------------------------------------------------------------------------------------------------------------------------------------------------------------------------------------------------------------------------------------------------------------------------------------------------------------------------------------------------------------------------------------------------------------------------------------------------------------------------------------------------------|----------------------------------------------------------------------------------------------------------------------------------------------------------------------------------------------------------------------------------------------------------------------------------------------------------------------------------------------------------------------------------------------------------------------------------------------------------------------------------------------------------------------------------------------------------------------------------------------------------------------------------------------------------------------------------------------------------------------------------------------------------------------------------------------------------------------------------------------------------------------------------------------------------------------------------------------------------------------------------------------------------------------------------------------------------------------------------------------------------------------------------------------------------------------------------------------------------------------------------------------------------------------------------------------------------------------------------------------------------------------------------------------------------------------------------------------------------------------------------------------------------------------------------------------------------------------------------------------------------------------------------------------------------------------------------------------------------------------------------------------------------------------------------------------------------------------------------------------------------------------------------------------------------------------------------------------------------------------------------------------------------------------------------------------------------------------------------------------------------------------------------------------------------------------------------------------------------------------|---------------------------------------------------------------------------------------------------------------------------------------------------------------------------------------------------------------------------------------------------------------------------------------------------------------------------------------------------------------------------------------------------------------------------------------------------------------------------------------------------------------------------------------------------------------------------------------------------------------------------------------------------------------------------------------------------------------------------------------------------------------------------------------------------------------------------------------------------------------------------------------------------------------------------------------------------------------------------------------------------------------------------------------------------------------------------------------------------------------------------------------------------------------------------------------------------------------------------------------------------------------------------------------------------------------------------------------------------------------------------------------------------------------------------------------------------------------------------------------------------------------------------------------------------------------------------------------------------------------------------------------------------------------------------------------------------------------------------------------------------------------------------------------------------------------------------------------------------------------------------------------------------------------------------------------------------------------------------|

|            |                                                                                                                                                                                                                                                                                                                                                                                                                                                                                                                                                                                                                                                                                                                                                                                                                                                                                                                                                                                                                                                                                                                                                                                                                                                                                                                                                                                                                                                                                                                                                                                                                                                                                                                                                                                                                                                                                                                                                                                                                                     |                                                                                                                                                                                                                                                                                                                                                                                                                                                                                                                                                                                                                                                                                                                                                                                                                                                                                                                                                                                                                                                                                                                                                                                                                                                                                                                                                                                                                                                                                                                                                                                                                                                                                                                                                                                                |                                                                                                                                                                                                                                                                                                                                                                                                                                                                                                                                                                                                                                                                                                                                                                                                                                                                                                                                                                                                                                                                                                                                                                                                                                                                                                                                                                                                                                                                                                                                                                                                                                                                                   |
|------------|-------------------------------------------------------------------------------------------------------------------------------------------------------------------------------------------------------------------------------------------------------------------------------------------------------------------------------------------------------------------------------------------------------------------------------------------------------------------------------------------------------------------------------------------------------------------------------------------------------------------------------------------------------------------------------------------------------------------------------------------------------------------------------------------------------------------------------------------------------------------------------------------------------------------------------------------------------------------------------------------------------------------------------------------------------------------------------------------------------------------------------------------------------------------------------------------------------------------------------------------------------------------------------------------------------------------------------------------------------------------------------------------------------------------------------------------------------------------------------------------------------------------------------------------------------------------------------------------------------------------------------------------------------------------------------------------------------------------------------------------------------------------------------------------------------------------------------------------------------------------------------------------------------------------------------------------------------------------------------------------------------------------------------------|------------------------------------------------------------------------------------------------------------------------------------------------------------------------------------------------------------------------------------------------------------------------------------------------------------------------------------------------------------------------------------------------------------------------------------------------------------------------------------------------------------------------------------------------------------------------------------------------------------------------------------------------------------------------------------------------------------------------------------------------------------------------------------------------------------------------------------------------------------------------------------------------------------------------------------------------------------------------------------------------------------------------------------------------------------------------------------------------------------------------------------------------------------------------------------------------------------------------------------------------------------------------------------------------------------------------------------------------------------------------------------------------------------------------------------------------------------------------------------------------------------------------------------------------------------------------------------------------------------------------------------------------------------------------------------------------------------------------------------------------------------------------------------------------|-----------------------------------------------------------------------------------------------------------------------------------------------------------------------------------------------------------------------------------------------------------------------------------------------------------------------------------------------------------------------------------------------------------------------------------------------------------------------------------------------------------------------------------------------------------------------------------------------------------------------------------------------------------------------------------------------------------------------------------------------------------------------------------------------------------------------------------------------------------------------------------------------------------------------------------------------------------------------------------------------------------------------------------------------------------------------------------------------------------------------------------------------------------------------------------------------------------------------------------------------------------------------------------------------------------------------------------------------------------------------------------------------------------------------------------------------------------------------------------------------------------------------------------------------------------------------------------------------------------------------------------------------------------------------------------|
| <p>Q26</p> | <p>Immunotherapy has changed the landscape of cancer treatment, including for some types of colorectal cancer. However, as of my last update in September 2021, the role of immunotherapy specifically after surgery for colon or rectal cancers is not as straightforward.</p> <p>Many colon or rectal cancers are treated initially with surgery, often followed by chemotherapy, particularly for more advanced stages (stage III and some stage II). This approach aims to eliminate any microscopic disease that may remain after surgery. The chemotherapy used in this setting (known as adjuvant therapy) typically includes a combination of drugs such as 5-fluorouracil (5-FU), oxaliplatin, and leucovorin, often referred to as FOLFOX.</p> <p>Immunotherapy, such as immune checkpoint inhibitors, has shown promising results in certain subsets of colorectal cancer, specifically those with microsatellite instability-high (MSI-H) or mismatch repair deficient (dMMR) tumors, which represent about 15% of all colorectal cancers. These cancers tend to have a high number of mutations, which can make them more recognizable to the immune system and hence more responsive to immunotherapy. However, as of my last update, this has primarily been explored in the metastatic setting, when the disease has spread beyond the colon or rectum, rather than in the adjuvant setting after surgery.</p> <p>Clinical trials are ongoing to determine whether immunotherapy could have a role after surgery for colon or rectal cancers, and early results are promising. However, more research is needed to fully understand the best use of these drugs in this setting.</p> <p>Remember, treatment recommendations will depend on many factors, including the specific characteristics of the cancer, the patient's overall health, and potential side effects. Therefore, it's important for patients to have these discussions with their oncologist to make the best individualized treatment plan.</p> | <p>As of my last update in September 2021, the role of immunotherapy in the adjuvant setting (post-surgery) for colon or rectal cancers is not well established.</p> <p>Traditional treatment for colon or rectal cancer often involves surgery to remove the tumor followed by chemotherapy, particularly for more advanced stages (Stage III and some high-risk Stage II cases). The chemotherapy, often a regimen known as FOLFOX (Folinic acid, Fluorouracil, Oxaliplatin) or CAPOX (Capecitabine, Oxaliplatin), is aimed at eliminating any remaining cancer cells and reducing the risk of cancer recurrence.</p> <p>Immunotherapy, specifically checkpoint inhibitors, have shown promise in treating certain subsets of colorectal cancer, particularly those that are characterized as microsatellite instability-high (MSI-H) or mismatch repair deficient (dMMR). These types of tumors, which make up about 15% of colorectal cancers, have genetic characteristics that make them more likely to respond to immunotherapy.</p> <p>However, as of 2021, the use of immunotherapy has been primarily explored in the metastatic setting (when the cancer has spread to other parts of the body) rather than in the adjuvant setting.</p> <p>Clinical trials are ongoing to evaluate the role of immunotherapy in the adjuvant setting for colorectal cancer. It's important to note that the field of oncology is rapidly evolving, and new studies may provide more insights into the use of immunotherapy in this context.</p> <p>As always, treatment decisions should be made in consultation with a healthcare provider or oncologist, taking into account the specifics of the cancer, the patient's overall health, and the benefits and risks of each treatment option.</p> | <p>As of my training cut-off in September 2021, the use of immunotherapy after surgery for colon or rectal cancers, often called adjuvant therapy, is not standard of care but is under active investigation.</p> <p>Typically, surgery is the first line of treatment for colon or rectal cancers, followed by adjuvant chemotherapy in more advanced disease stages (stage III and high-risk stage II). Adjuvant chemotherapy is used to kill any remaining cancer cells that could cause a recurrence. Regimens such as FOLFOX (Folinic acid, Fluorouracil, Oxaliplatin) or CAPOX (Capecitabine, Oxaliplatin) are common.</p> <p>Immunotherapy, including immune checkpoint inhibitors, has shown promise in treating certain subtypes of colorectal cancers, particularly those that are microsatellite instability-high (MSI-H) or mismatch repair deficient (dMMR). These tumors have a high mutation rate, which can make them more responsive to immunotherapy. However, as of my knowledge cutoff in 2021, this has mostly been tested and used in the metastatic setting, i.e., when the cancer has already spread to other parts of the body.</p> <p>There are ongoing clinical trials to determine the effectiveness of immunotherapy in the adjuvant setting for colon or rectal cancers. This is a rapidly evolving area of research, and more data will become available in the future.</p> <p>Treatment plans are individualized and based on many factors, including the patient's overall health and specific characteristics of the tumor. Always consult with a healthcare provider or oncologist for the most current information and treatment options.</p> |
|------------|-------------------------------------------------------------------------------------------------------------------------------------------------------------------------------------------------------------------------------------------------------------------------------------------------------------------------------------------------------------------------------------------------------------------------------------------------------------------------------------------------------------------------------------------------------------------------------------------------------------------------------------------------------------------------------------------------------------------------------------------------------------------------------------------------------------------------------------------------------------------------------------------------------------------------------------------------------------------------------------------------------------------------------------------------------------------------------------------------------------------------------------------------------------------------------------------------------------------------------------------------------------------------------------------------------------------------------------------------------------------------------------------------------------------------------------------------------------------------------------------------------------------------------------------------------------------------------------------------------------------------------------------------------------------------------------------------------------------------------------------------------------------------------------------------------------------------------------------------------------------------------------------------------------------------------------------------------------------------------------------------------------------------------------|------------------------------------------------------------------------------------------------------------------------------------------------------------------------------------------------------------------------------------------------------------------------------------------------------------------------------------------------------------------------------------------------------------------------------------------------------------------------------------------------------------------------------------------------------------------------------------------------------------------------------------------------------------------------------------------------------------------------------------------------------------------------------------------------------------------------------------------------------------------------------------------------------------------------------------------------------------------------------------------------------------------------------------------------------------------------------------------------------------------------------------------------------------------------------------------------------------------------------------------------------------------------------------------------------------------------------------------------------------------------------------------------------------------------------------------------------------------------------------------------------------------------------------------------------------------------------------------------------------------------------------------------------------------------------------------------------------------------------------------------------------------------------------------------|-----------------------------------------------------------------------------------------------------------------------------------------------------------------------------------------------------------------------------------------------------------------------------------------------------------------------------------------------------------------------------------------------------------------------------------------------------------------------------------------------------------------------------------------------------------------------------------------------------------------------------------------------------------------------------------------------------------------------------------------------------------------------------------------------------------------------------------------------------------------------------------------------------------------------------------------------------------------------------------------------------------------------------------------------------------------------------------------------------------------------------------------------------------------------------------------------------------------------------------------------------------------------------------------------------------------------------------------------------------------------------------------------------------------------------------------------------------------------------------------------------------------------------------------------------------------------------------------------------------------------------------------------------------------------------------|

|                   |                                                                                                                                                                                                                                                                                                                                                                                                                                                                                                                                                                                                                                                                                                                                                                                                                                                                                                                                                                                                                                                                                                                                                                                                                                                                                                                                                                                                                                                                                                                                                                                                                                                                                                                                                                                                                                                                                                                                                                                                                                                                                                                                                                                                                  |                                                                                                                                                                                                                                                                                                                                                                                                                                                                                                                                                                                                                                                                                                                                                                                                                                                                                                                                                                                                                                                                                                                                                                                                                                                                                                                                                                                                                                                                                                                                                                                                                                                                                                                                                                                                                                                                                                                                                                                                                                                                                                                                                                                                                                            |                                                                                                                                                                                                                                                                                                                                                                                                                                                                                                                                                                                                                                                                                                                                                                                                                                                                                                                                                                                                                                                                                                                                                                                                                                                                                                                                                                                                                                                                                                                                                                                                                                                                                                                                                                                                                                                                                                                                                                                                                                                                                                                                                                                                                                                                                                                                                                                      |
|-------------------|------------------------------------------------------------------------------------------------------------------------------------------------------------------------------------------------------------------------------------------------------------------------------------------------------------------------------------------------------------------------------------------------------------------------------------------------------------------------------------------------------------------------------------------------------------------------------------------------------------------------------------------------------------------------------------------------------------------------------------------------------------------------------------------------------------------------------------------------------------------------------------------------------------------------------------------------------------------------------------------------------------------------------------------------------------------------------------------------------------------------------------------------------------------------------------------------------------------------------------------------------------------------------------------------------------------------------------------------------------------------------------------------------------------------------------------------------------------------------------------------------------------------------------------------------------------------------------------------------------------------------------------------------------------------------------------------------------------------------------------------------------------------------------------------------------------------------------------------------------------------------------------------------------------------------------------------------------------------------------------------------------------------------------------------------------------------------------------------------------------------------------------------------------------------------------------------------------------|--------------------------------------------------------------------------------------------------------------------------------------------------------------------------------------------------------------------------------------------------------------------------------------------------------------------------------------------------------------------------------------------------------------------------------------------------------------------------------------------------------------------------------------------------------------------------------------------------------------------------------------------------------------------------------------------------------------------------------------------------------------------------------------------------------------------------------------------------------------------------------------------------------------------------------------------------------------------------------------------------------------------------------------------------------------------------------------------------------------------------------------------------------------------------------------------------------------------------------------------------------------------------------------------------------------------------------------------------------------------------------------------------------------------------------------------------------------------------------------------------------------------------------------------------------------------------------------------------------------------------------------------------------------------------------------------------------------------------------------------------------------------------------------------------------------------------------------------------------------------------------------------------------------------------------------------------------------------------------------------------------------------------------------------------------------------------------------------------------------------------------------------------------------------------------------------------------------------------------------------|--------------------------------------------------------------------------------------------------------------------------------------------------------------------------------------------------------------------------------------------------------------------------------------------------------------------------------------------------------------------------------------------------------------------------------------------------------------------------------------------------------------------------------------------------------------------------------------------------------------------------------------------------------------------------------------------------------------------------------------------------------------------------------------------------------------------------------------------------------------------------------------------------------------------------------------------------------------------------------------------------------------------------------------------------------------------------------------------------------------------------------------------------------------------------------------------------------------------------------------------------------------------------------------------------------------------------------------------------------------------------------------------------------------------------------------------------------------------------------------------------------------------------------------------------------------------------------------------------------------------------------------------------------------------------------------------------------------------------------------------------------------------------------------------------------------------------------------------------------------------------------------------------------------------------------------------------------------------------------------------------------------------------------------------------------------------------------------------------------------------------------------------------------------------------------------------------------------------------------------------------------------------------------------------------------------------------------------------------------------------------------------|
| <p><b>Q27</b></p> | <p>Immunotherapy has revolutionized the treatment of several types of cancer and is under investigation for many others, including glioblastoma multiforme (GBM), a common and aggressive type of primary brain tumor. However, as of my last update in September 2021, the role of immunotherapy for GBM is still mostly experimental and not yet a standard of care.</p> <p>Several types of immunotherapy have been or are currently being studied in GBM:</p> <ol style="list-style-type: none"> <li><b>Immune checkpoint inhibitors</b>: These drugs, which include pembrolizumab (Keytruda) and nivolumab (Opdivo), have shown effectiveness in many cancers by blocking proteins that prevent immune cells from attacking cancer cells. Unfortunately, results from clinical trials in GBM have been disappointing so far, but research is ongoing.</li> <li><b>Vaccine therapy</b>: Vaccines aim to stimulate the immune system to recognize and attack cancer cells. Several types of vaccines are being tested in GBM, including personalized vaccines made from a patient's own tumor cells or from specific proteins in those cells.</li> <li><b>Oncolytic virus therapy</b>: Oncolytic viruses are viruses that are genetically modified to selectively infect and kill cancer cells. One example is a modified poliovirus that is being tested in GBM.</li> <li><b>CAR-T cell therapy</b>: Chimeric antigen receptor (CAR) T-cell therapy is a type of treatment in which a patient's own T cells (a type of immune cell) are genetically modified to recognize and attack cancer cells. This approach is being explored in GBM as well. The blood-brain barrier, a protective shield around the brain, makes it more challenging to effectively deliver immunotherapies to brain tumors. Research is ongoing to find ways to overcome this obstacle. Patients with GBM should consider participation in clinical trials, which provide access to experimental therapies and contribute to the scientific understanding of this aggressive disease. It's important for patients to discuss these options with their healthcare provider to understand the potential benefits and risks.</li> </ol> | <p>Glioblastoma multiforme (GBM) is a highly aggressive type of primary brain cancer. Unfortunately, treatment options are limited and outcomes are generally poor. Standard treatment often involves surgery, if possible, followed by radiation and chemotherapy with a drug called temozolomide.</p> <p>As of my last update in September 2021, the use of immunotherapy for GBM is an active area of research, but it has not yet become a standard of care. Here are some immunotherapy approaches being explored:</p> <ol style="list-style-type: none"> <li><b>Checkpoint inhibitors</b>: These drugs, such as pembrolizumab (Keytruda) and nivolumab (Opdivo), work by taking the "brakes" off the immune system, allowing it to more effectively fight cancer. While these drugs have been effective in some types of cancer, they have not shown significant benefits in GBM in large clinical trials as of 2021.</li> <li><b>Vaccine therapy</b>: Vaccines are being studied that aim to train the immune system to better recognize and attack GBM cells. Some of these vaccines are personalized, using specific proteins or cells from the patient's own tumor.</li> <li><b>CAR-T cell therapy</b>: This involves modifying a patient's own immune cells to recognize and attack their cancer. While this has shown promise in some blood cancers, it is still being studied in GBM.</li> <li><b>Oncolytic virus therapy</b>: This strategy uses genetically modified viruses that can infect and kill cancer cells while sparing normal cells. Some early studies have shown promise in GBM.</li> </ol> <p>A major challenge with using immunotherapy in brain tumors is the presence of the blood-brain barrier, which can prevent drugs from reaching the tumor. Strategies to circumvent this barrier are being studied.</p> <p>Clinical trials are essential for advancing these potential treatments. Patients with GBM should consider discussing with their healthcare provider the possibility of enrolling in a clinical trial. It's also important to remember that the field of oncology is rapidly advancing, and newer treatments may have become available or shown promise since my last update in 2021.</p> | <p>Glioblastoma multiforme (GBM) is the most common and deadliest form of primary brain cancer in adults. As of my knowledge cut-off in September 2021, the standard treatment for GBM includes surgery, radiation, and chemotherapy (usually with a drug called temozolomide). Despite this aggressive treatment approach, the prognosis for GBM remains poor, with a median survival of around 15 months.</p> <p>Immunotherapy, which aims to harness the body's own immune system to fight cancer, has emerged as a promising new treatment approach in many cancer types. For GBM, the role of immunotherapy is still under active investigation in clinical trials, but it has not yet become a standard of care.</p> <p>Several types of immunotherapy have been or are currently being studied in GBM:</p> <ol style="list-style-type: none"> <li><b>Immune Checkpoint Inhibitors</b>: Drugs like pembrolizumab (Keytruda) and nivolumab (Opdivo) have shown promise in treating several types of cancer by blocking proteins that prevent the immune system from attacking cancer cells. However, early results in GBM have been somewhat disappointing.</li> <li><b>Cancer Vaccines</b>: Personalized vaccines, made from a patient's own tumor cells or specific proteins in those cells, are being tested in clinical trials for their ability to stimulate the immune system to attack the cancer.</li> <li><b>Oncolytic Virus Therapy</b>: Oncolytic viruses are genetically engineered to selectively infect and kill cancer cells. Preliminary research has shown some promise in GBM.</li> <li><b>CAR-T Cell Therapy</b>: In this treatment, a patient's T cells (a type of immune cell) are genetically modified to recognize and attack their cancer cells. While this has proven effective in some types of blood cancer, its efficacy in solid tumors like GBM is still under investigation. One major challenge in treating brain tumors with immunotherapy is the blood-brain barrier, which can prevent drugs from effectively reaching the tumor. Researchers are working on ways to overcome this barrier. Given the aggressive nature of GBM and the limited effectiveness of current treatments, participation in clinical trials investigating new treatment approaches, including immunotherapy, may be a valuable option for many patients.</li> </ol> |
|-------------------|------------------------------------------------------------------------------------------------------------------------------------------------------------------------------------------------------------------------------------------------------------------------------------------------------------------------------------------------------------------------------------------------------------------------------------------------------------------------------------------------------------------------------------------------------------------------------------------------------------------------------------------------------------------------------------------------------------------------------------------------------------------------------------------------------------------------------------------------------------------------------------------------------------------------------------------------------------------------------------------------------------------------------------------------------------------------------------------------------------------------------------------------------------------------------------------------------------------------------------------------------------------------------------------------------------------------------------------------------------------------------------------------------------------------------------------------------------------------------------------------------------------------------------------------------------------------------------------------------------------------------------------------------------------------------------------------------------------------------------------------------------------------------------------------------------------------------------------------------------------------------------------------------------------------------------------------------------------------------------------------------------------------------------------------------------------------------------------------------------------------------------------------------------------------------------------------------------------|--------------------------------------------------------------------------------------------------------------------------------------------------------------------------------------------------------------------------------------------------------------------------------------------------------------------------------------------------------------------------------------------------------------------------------------------------------------------------------------------------------------------------------------------------------------------------------------------------------------------------------------------------------------------------------------------------------------------------------------------------------------------------------------------------------------------------------------------------------------------------------------------------------------------------------------------------------------------------------------------------------------------------------------------------------------------------------------------------------------------------------------------------------------------------------------------------------------------------------------------------------------------------------------------------------------------------------------------------------------------------------------------------------------------------------------------------------------------------------------------------------------------------------------------------------------------------------------------------------------------------------------------------------------------------------------------------------------------------------------------------------------------------------------------------------------------------------------------------------------------------------------------------------------------------------------------------------------------------------------------------------------------------------------------------------------------------------------------------------------------------------------------------------------------------------------------------------------------------------------------|--------------------------------------------------------------------------------------------------------------------------------------------------------------------------------------------------------------------------------------------------------------------------------------------------------------------------------------------------------------------------------------------------------------------------------------------------------------------------------------------------------------------------------------------------------------------------------------------------------------------------------------------------------------------------------------------------------------------------------------------------------------------------------------------------------------------------------------------------------------------------------------------------------------------------------------------------------------------------------------------------------------------------------------------------------------------------------------------------------------------------------------------------------------------------------------------------------------------------------------------------------------------------------------------------------------------------------------------------------------------------------------------------------------------------------------------------------------------------------------------------------------------------------------------------------------------------------------------------------------------------------------------------------------------------------------------------------------------------------------------------------------------------------------------------------------------------------------------------------------------------------------------------------------------------------------------------------------------------------------------------------------------------------------------------------------------------------------------------------------------------------------------------------------------------------------------------------------------------------------------------------------------------------------------------------------------------------------------------------------------------------------|



|                   |                                                                                                                                                                                                                                                                                                                                                                                                                                                                                                                                                                                                                                                                                                                                                                                                                                                                                                                                                                                                                                                                                                                                                                                                                                                                                                                                                                                                                                                                                                                                                                                                                                                                                                                                                                                                                                                                                                                                                                                |                                                                                                                                                                                                                                                                                                                                                                                                                                                                                                                                                                                                                                                                                                                                                                                                                                                                                                                                                                                                                                                                                                                                                                                                                                                                                                                                                                                                                                                                                                                                                                                                                                                                                                                                                                                                              |                                                                                                                                                                                                                                                                                                                                                                                                                                                                                                                                                                                                                                                                                                                                                                                                                                                                                                                                                                                                                                                                                                                                                                                                                                                                                                                                                                                                                                                                                                                                                                                                                                                                                                                                                                             |
|-------------------|--------------------------------------------------------------------------------------------------------------------------------------------------------------------------------------------------------------------------------------------------------------------------------------------------------------------------------------------------------------------------------------------------------------------------------------------------------------------------------------------------------------------------------------------------------------------------------------------------------------------------------------------------------------------------------------------------------------------------------------------------------------------------------------------------------------------------------------------------------------------------------------------------------------------------------------------------------------------------------------------------------------------------------------------------------------------------------------------------------------------------------------------------------------------------------------------------------------------------------------------------------------------------------------------------------------------------------------------------------------------------------------------------------------------------------------------------------------------------------------------------------------------------------------------------------------------------------------------------------------------------------------------------------------------------------------------------------------------------------------------------------------------------------------------------------------------------------------------------------------------------------------------------------------------------------------------------------------------------------|--------------------------------------------------------------------------------------------------------------------------------------------------------------------------------------------------------------------------------------------------------------------------------------------------------------------------------------------------------------------------------------------------------------------------------------------------------------------------------------------------------------------------------------------------------------------------------------------------------------------------------------------------------------------------------------------------------------------------------------------------------------------------------------------------------------------------------------------------------------------------------------------------------------------------------------------------------------------------------------------------------------------------------------------------------------------------------------------------------------------------------------------------------------------------------------------------------------------------------------------------------------------------------------------------------------------------------------------------------------------------------------------------------------------------------------------------------------------------------------------------------------------------------------------------------------------------------------------------------------------------------------------------------------------------------------------------------------------------------------------------------------------------------------------------------------|-----------------------------------------------------------------------------------------------------------------------------------------------------------------------------------------------------------------------------------------------------------------------------------------------------------------------------------------------------------------------------------------------------------------------------------------------------------------------------------------------------------------------------------------------------------------------------------------------------------------------------------------------------------------------------------------------------------------------------------------------------------------------------------------------------------------------------------------------------------------------------------------------------------------------------------------------------------------------------------------------------------------------------------------------------------------------------------------------------------------------------------------------------------------------------------------------------------------------------------------------------------------------------------------------------------------------------------------------------------------------------------------------------------------------------------------------------------------------------------------------------------------------------------------------------------------------------------------------------------------------------------------------------------------------------------------------------------------------------------------------------------------------------|
| <p><b>Q28</b></p> | <p>The International Metastatic Renal Cell Carcinoma Database Consortium (IMDC) risk score is a widely accepted tool to assess prognosis in patients with metastatic renal cell carcinoma (mRCC), a type of kidney cancer. It takes into account various clinical and laboratory factors, and stratifies patients into favorable (score of 0), intermediate (score of 1-2), or poor risk (score of 3-6) categories.</p> <p>For patients with metastatic RCC, the choice of first-line treatment often depends on the IMDC risk score and other factors, such as the patient's overall health and individual preferences. As of my last update in September 2021, immunotherapy in combination with other therapies is a recommended first-line treatment option for many patients with mRCC, irrespective of their IMDC risk score.</p> <p>For instance, guidelines may recommend combinations like nivolumab and ipilimumab (both immunotherapies), or a tyrosine kinase inhibitor (a type of targeted therapy) such as axitinib in combination with an immunotherapy like pembrolizumab or avelumab.</p> <p>For patients with favorable risk disease, there may also be an option to use a targeted therapy such as sunitinib or pazopanib alone.</p> <p>However, the field of oncology is rapidly evolving, and new research results are continuously being published. Therefore, it's essential to discuss your treatment options with your healthcare provider or oncologist, who can provide the most up-to-date and personalized advice.</p> <p>Please note that while the IMDC risk score is useful in guiding treatment decisions and estimating prognosis on a population level, it may not precisely predict an individual patient's response to treatment or overall outcome. Other factors such as genetic mutations, overall health status, personal preferences, and specific characteristics of the tumor also play a significant role in these decisions.</p> | <p>The International Metastatic Renal Cell Carcinoma Database Consortium (IMDC) risk score is a tool used to determine the prognosis of patients with metastatic renal cell carcinoma (mRCC), which is a type of kidney cancer. The risk score ranges from 0 to 6, with lower scores generally associated with a better prognosis.</p> <p>As of my training cut-off in September 2021, first-line treatment for mRCC often includes targeted therapies, immune checkpoint inhibitors, or a combination of both, depending on various factors such as the patient's IMDC risk score, overall health status, and personal preferences.</p> <p>Patients with favorable risk disease (IMDC score 0) often receive targeted therapies such as sunitinib or pazopanib, or combinations of an immune checkpoint inhibitor with a targeted therapy. The combination of axitinib, a targeted therapy, and pembrolizumab, an immune checkpoint inhibitor, has shown improved outcomes compared to sunitinib alone in this group of patients.</p> <p>While immunotherapy has become an essential part of the treatment landscape for kidney cancer, it's crucial to remember that not all patients respond to these treatments, and they can have significant side effects. Treatment decisions should always be made in collaboration with your oncologist, who can consider your overall health, the characteristics of your cancer, and your personal preferences in recommending the best treatment plan for you.</p> <p>The field of oncology is rapidly evolving, and new therapies and treatment combinations are continually being developed and tested. It's essential to have up-to-date discussions with your healthcare provider, who will have the most recent information beyond my training cut-off.</p> | <p>The International Metastatic Renal Cell Carcinoma Database Consortium (IMDC) risk score is a tool that helps doctors predict the prognosis of patients with metastatic renal cell carcinoma (RCC), a type of kidney cancer. It's based on six factors, and patients with none of these factors (like yourself) are considered to have a good prognosis.</p> <p>As of my training cut-off in September 2021, immune checkpoint inhibitors, a type of immunotherapy, have become an important part of the treatment landscape for RCC. However, the best treatment for any individual patient depends on a variety of factors, including the specific characteristics of their cancer, their overall health, and personal preferences.</p> <p>For patients with a good prognosis (IMDC score of 0), treatment options may include:</p> <ol style="list-style-type: none"> <li>1. Targeted therapy alone, such as sunitinib or pazopanib.</li> <li>2. A combination of an immune checkpoint inhibitor and a targeted therapy. For example, the combination of axitinib (a targeted therapy) and pembrolizumab or avelumab (both immune checkpoint inhibitors) has been approved for first-line treatment of advanced RCC.</li> </ol> <p>It's important to remember that while some patients have significant benefit from immunotherapy, others may not respond as well, and these treatments can also have side effects. Therefore, it's crucial to discuss the potential benefits and risks of all treatment options with your healthcare provider.</p> <p>As the field of oncology is rapidly evolving, newer treatment options may have become available since my last update. Always consult with your oncologist for the most up-to-date and personalized advice.</p> |
|-------------------|--------------------------------------------------------------------------------------------------------------------------------------------------------------------------------------------------------------------------------------------------------------------------------------------------------------------------------------------------------------------------------------------------------------------------------------------------------------------------------------------------------------------------------------------------------------------------------------------------------------------------------------------------------------------------------------------------------------------------------------------------------------------------------------------------------------------------------------------------------------------------------------------------------------------------------------------------------------------------------------------------------------------------------------------------------------------------------------------------------------------------------------------------------------------------------------------------------------------------------------------------------------------------------------------------------------------------------------------------------------------------------------------------------------------------------------------------------------------------------------------------------------------------------------------------------------------------------------------------------------------------------------------------------------------------------------------------------------------------------------------------------------------------------------------------------------------------------------------------------------------------------------------------------------------------------------------------------------------------------|--------------------------------------------------------------------------------------------------------------------------------------------------------------------------------------------------------------------------------------------------------------------------------------------------------------------------------------------------------------------------------------------------------------------------------------------------------------------------------------------------------------------------------------------------------------------------------------------------------------------------------------------------------------------------------------------------------------------------------------------------------------------------------------------------------------------------------------------------------------------------------------------------------------------------------------------------------------------------------------------------------------------------------------------------------------------------------------------------------------------------------------------------------------------------------------------------------------------------------------------------------------------------------------------------------------------------------------------------------------------------------------------------------------------------------------------------------------------------------------------------------------------------------------------------------------------------------------------------------------------------------------------------------------------------------------------------------------------------------------------------------------------------------------------------------------|-----------------------------------------------------------------------------------------------------------------------------------------------------------------------------------------------------------------------------------------------------------------------------------------------------------------------------------------------------------------------------------------------------------------------------------------------------------------------------------------------------------------------------------------------------------------------------------------------------------------------------------------------------------------------------------------------------------------------------------------------------------------------------------------------------------------------------------------------------------------------------------------------------------------------------------------------------------------------------------------------------------------------------------------------------------------------------------------------------------------------------------------------------------------------------------------------------------------------------------------------------------------------------------------------------------------------------------------------------------------------------------------------------------------------------------------------------------------------------------------------------------------------------------------------------------------------------------------------------------------------------------------------------------------------------------------------------------------------------------------------------------------------------|

|                   |                                                                                                                                                                                                                                                                                                                                                                                                                                                                                                                                                                                                                                                                                                                                                                                                                                                                                                                                                                                                                                                                                                                                                                                                                                                                                                                                                                                                                                                                                                                                                                                                                                                                                                                                                                                                                                                                                                                                                                                                                                           |                                                                                                                                                                                                                                                                                                                                                                                                                                                                                                                                                                                                                                                                                                                                                                                                                                                                                                                                                                                                                                                                                                                                                                                                                                                                                                                                                                                                                                                                                                                                                                                                                                                                                                                                                                                                                                                                                                       |                                                                                                                                                                                                                                                                                                                                                                                                                                                                                                                                                                                                                                                                                                                                                                                                                                                                                                                                                                                                                                                                                                                                                                                                                                                                                                                                                                                                                                                                                                                                                                                                                                                                                                                                                                                                                                                                                                                                                                                                                                                                                                                                                                                                                                                |
|-------------------|-------------------------------------------------------------------------------------------------------------------------------------------------------------------------------------------------------------------------------------------------------------------------------------------------------------------------------------------------------------------------------------------------------------------------------------------------------------------------------------------------------------------------------------------------------------------------------------------------------------------------------------------------------------------------------------------------------------------------------------------------------------------------------------------------------------------------------------------------------------------------------------------------------------------------------------------------------------------------------------------------------------------------------------------------------------------------------------------------------------------------------------------------------------------------------------------------------------------------------------------------------------------------------------------------------------------------------------------------------------------------------------------------------------------------------------------------------------------------------------------------------------------------------------------------------------------------------------------------------------------------------------------------------------------------------------------------------------------------------------------------------------------------------------------------------------------------------------------------------------------------------------------------------------------------------------------------------------------------------------------------------------------------------------------|-------------------------------------------------------------------------------------------------------------------------------------------------------------------------------------------------------------------------------------------------------------------------------------------------------------------------------------------------------------------------------------------------------------------------------------------------------------------------------------------------------------------------------------------------------------------------------------------------------------------------------------------------------------------------------------------------------------------------------------------------------------------------------------------------------------------------------------------------------------------------------------------------------------------------------------------------------------------------------------------------------------------------------------------------------------------------------------------------------------------------------------------------------------------------------------------------------------------------------------------------------------------------------------------------------------------------------------------------------------------------------------------------------------------------------------------------------------------------------------------------------------------------------------------------------------------------------------------------------------------------------------------------------------------------------------------------------------------------------------------------------------------------------------------------------------------------------------------------------------------------------------------------------|------------------------------------------------------------------------------------------------------------------------------------------------------------------------------------------------------------------------------------------------------------------------------------------------------------------------------------------------------------------------------------------------------------------------------------------------------------------------------------------------------------------------------------------------------------------------------------------------------------------------------------------------------------------------------------------------------------------------------------------------------------------------------------------------------------------------------------------------------------------------------------------------------------------------------------------------------------------------------------------------------------------------------------------------------------------------------------------------------------------------------------------------------------------------------------------------------------------------------------------------------------------------------------------------------------------------------------------------------------------------------------------------------------------------------------------------------------------------------------------------------------------------------------------------------------------------------------------------------------------------------------------------------------------------------------------------------------------------------------------------------------------------------------------------------------------------------------------------------------------------------------------------------------------------------------------------------------------------------------------------------------------------------------------------------------------------------------------------------------------------------------------------------------------------------------------------------------------------------------------------|
| <p><b>Q29</b></p> | <p>POLE (DNA polymerase epsilon) is an enzyme that plays a crucial role in DNA replication and repair. Mutations in the POLE gene can lead to an unusually high number of mutations in the DNA of cells, a state known as "ultramutation." Some types of cancer, including a small proportion of endometrial cancers and colorectal cancers, and even more rarely ovarian cancers, can be associated with POLE mutations.</p> <p>As of my last update in September 2021, it's known that tumors with a high number of mutations (known as high tumor mutational burden or TMB), such as those with POLE mutations, may be more likely to respond to immunotherapies like checkpoint inhibitors (e.g., pembrolizumab, nivolumab). This is because the high number of mutations can produce a greater number of neoantigens, which are unique markers on the surface of cancer cells. These neoantigens can make the cancer cells more recognizable to the immune system, which can enhance the effect of immunotherapies.</p> <p>However, the specific benefit of immunotherapy for ovarian cancers with POLE mutations is less well established due to the rarity of these mutations in ovarian cancer. Most studies on POLE mutations and their impact on response to immunotherapy have focused on endometrial and colorectal cancers.</p> <p>As a patient with ovarian cancer and a POLE mutation, it would be worth discussing the potential benefits and risks of immunotherapy with your treating oncologist. You might also be eligible for clinical trials exploring novel treatments for patients with your specific genetic profile.</p> <p>As with all medical advice, it's important to have these conversations with your healthcare provider, who can give you the most personalized and up-to-date recommendations based on the specifics of your cancer and overall health. The field of oncology is rapidly advancing, and newer treatments may have become available or shown promise since my last update in 2021.</p> | <p>The POLE gene codes for a DNA polymerase enzyme that's crucial for DNA replication and repair. Mutations in this gene, known as POLE mutations, can lead to a high number of mutations within the tumor's DNA, known as high tumor mutational burden (TMB). High TMB can increase the likelihood that the immune system will recognize and attack the tumor.</p> <p>Immunotherapies, particularly checkpoint inhibitors like pembrolizumab (Keytruda) and nivolumab (Opdivo), have shown promise in treating some cancers with high TMB, irrespective of the tumor type. This forms the basis for the concept of "tumor-agnostic" treatment, where the decision to use a specific therapy is based on the genetic characteristics of the tumor rather than its location in the body.</p> <p>As of my knowledge cut-off in September 2021, the benefit of immunotherapy in ovarian cancer patients with POLE mutations specifically has not been fully established, primarily due to the rarity of these mutations in ovarian cancer. However, given the potential responsiveness of tumors with high TMB to immunotherapy, it's plausible that immunotherapy could be beneficial in this setting.</p> <p>Clinical trials are the primary way that such hypotheses are tested, and there may be trials ongoing or planned that would be appropriate for your situation. It's recommended that you discuss these considerations with your treating oncologist who can provide personalized advice based on your specific circumstances, the most recent research evidence, and available treatment options.</p> <p>Please remember that while the science is promising, not everyone responds to immunotherapy, and these therapies can have significant side effects. The decision to proceed with this type of treatment should be made after a detailed discussion with your healthcare team.</p> | <p>The POLE gene is responsible for coding an enzyme (DNA polymerase epsilon) that plays a vital role in DNA replication and repair. Mutations in this gene can lead to an unusually high number of mutations in a cell's DNA, a condition known as hypermutation. Some cancer types, including certain endometrial and colorectal cancers, and to a lesser extent, ovarian cancers, can be associated with POLE mutations.</p> <p>As of my last training data in September 2021, it is understood that tumors with high mutational burden, such as those with POLE mutations, might be more responsive to immunotherapies like immune checkpoint inhibitors (for example, pembrolizumab and nivolumab). This is because a higher number of mutations can result in a greater number of neoantigens, which are unique markers present on the surface of cancer cells. These neoantigens can make cancer cells more identifiable to the immune system, thereby enhancing the effect of immunotherapies.</p> <p>However, the specific benefits of immunotherapy for ovarian cancers with POLE mutations are less established due to the rarity of these mutations in ovarian cancer. While clinical trials and research into this topic are ongoing, most studies regarding POLE mutations and their response to immunotherapy have primarily focused on endometrial and colorectal cancers.</p> <p>If you have ovarian cancer with a POLE mutation, it's important to have a detailed discussion with your oncologist regarding potential treatment options, including the possibility of immunotherapy and participation in clinical trials. The specific characteristics of your cancer, your overall health, the potential benefits and risks of immunotherapy, and the most recent medical research should all be factors in this discussion.</p> <p>Remember that while some patients with high mutational burden cancers have had significant benefits from immunotherapy, not all patients respond to these treatments, and they can have substantial side effects. Your oncologist can provide the most accurate, up-to-date, and personalized advice based on your specific circumstances and the most recent scientific research.</p> |
|-------------------|-------------------------------------------------------------------------------------------------------------------------------------------------------------------------------------------------------------------------------------------------------------------------------------------------------------------------------------------------------------------------------------------------------------------------------------------------------------------------------------------------------------------------------------------------------------------------------------------------------------------------------------------------------------------------------------------------------------------------------------------------------------------------------------------------------------------------------------------------------------------------------------------------------------------------------------------------------------------------------------------------------------------------------------------------------------------------------------------------------------------------------------------------------------------------------------------------------------------------------------------------------------------------------------------------------------------------------------------------------------------------------------------------------------------------------------------------------------------------------------------------------------------------------------------------------------------------------------------------------------------------------------------------------------------------------------------------------------------------------------------------------------------------------------------------------------------------------------------------------------------------------------------------------------------------------------------------------------------------------------------------------------------------------------------|-------------------------------------------------------------------------------------------------------------------------------------------------------------------------------------------------------------------------------------------------------------------------------------------------------------------------------------------------------------------------------------------------------------------------------------------------------------------------------------------------------------------------------------------------------------------------------------------------------------------------------------------------------------------------------------------------------------------------------------------------------------------------------------------------------------------------------------------------------------------------------------------------------------------------------------------------------------------------------------------------------------------------------------------------------------------------------------------------------------------------------------------------------------------------------------------------------------------------------------------------------------------------------------------------------------------------------------------------------------------------------------------------------------------------------------------------------------------------------------------------------------------------------------------------------------------------------------------------------------------------------------------------------------------------------------------------------------------------------------------------------------------------------------------------------------------------------------------------------------------------------------------------------|------------------------------------------------------------------------------------------------------------------------------------------------------------------------------------------------------------------------------------------------------------------------------------------------------------------------------------------------------------------------------------------------------------------------------------------------------------------------------------------------------------------------------------------------------------------------------------------------------------------------------------------------------------------------------------------------------------------------------------------------------------------------------------------------------------------------------------------------------------------------------------------------------------------------------------------------------------------------------------------------------------------------------------------------------------------------------------------------------------------------------------------------------------------------------------------------------------------------------------------------------------------------------------------------------------------------------------------------------------------------------------------------------------------------------------------------------------------------------------------------------------------------------------------------------------------------------------------------------------------------------------------------------------------------------------------------------------------------------------------------------------------------------------------------------------------------------------------------------------------------------------------------------------------------------------------------------------------------------------------------------------------------------------------------------------------------------------------------------------------------------------------------------------------------------------------------------------------------------------------------|

|                   |                                                                                                                                                                                                                                                                                                                                                                                                                                                                                                                                                                                                                                                                                                                                                                                                                                                                                                                                                                                                                                                                                                                                                                                                                                                                                                                                                                                                                                                                                                                                                                                                                                                                                                                                                                                                                                                                                                                                                                                                                                                                                                           |                                                                                                                                                                                                                                                                                                                                                                                                                                                                                                                                                                                                                                                                                                                                                                                                                                                                                                                                                                                                                                                                                                                                                                                                                                                                                                                                                                                                                                                                                                                                                                                                                                                                                                                                                                                                                                                                                                                                                                                                                         |                                                                                                                                                                                                                                                                                                                                                                                                                                                                                                                                                                                                                                                                                                                                                                                                                                                                                                                                                                                                                                                                                                                                                                                                                                                                                                                                                                                                                                                                                                                                                                                                                                                                                                                                                                                                                                                                                                                                                                                                                                                                              |
|-------------------|-----------------------------------------------------------------------------------------------------------------------------------------------------------------------------------------------------------------------------------------------------------------------------------------------------------------------------------------------------------------------------------------------------------------------------------------------------------------------------------------------------------------------------------------------------------------------------------------------------------------------------------------------------------------------------------------------------------------------------------------------------------------------------------------------------------------------------------------------------------------------------------------------------------------------------------------------------------------------------------------------------------------------------------------------------------------------------------------------------------------------------------------------------------------------------------------------------------------------------------------------------------------------------------------------------------------------------------------------------------------------------------------------------------------------------------------------------------------------------------------------------------------------------------------------------------------------------------------------------------------------------------------------------------------------------------------------------------------------------------------------------------------------------------------------------------------------------------------------------------------------------------------------------------------------------------------------------------------------------------------------------------------------------------------------------------------------------------------------------------|-------------------------------------------------------------------------------------------------------------------------------------------------------------------------------------------------------------------------------------------------------------------------------------------------------------------------------------------------------------------------------------------------------------------------------------------------------------------------------------------------------------------------------------------------------------------------------------------------------------------------------------------------------------------------------------------------------------------------------------------------------------------------------------------------------------------------------------------------------------------------------------------------------------------------------------------------------------------------------------------------------------------------------------------------------------------------------------------------------------------------------------------------------------------------------------------------------------------------------------------------------------------------------------------------------------------------------------------------------------------------------------------------------------------------------------------------------------------------------------------------------------------------------------------------------------------------------------------------------------------------------------------------------------------------------------------------------------------------------------------------------------------------------------------------------------------------------------------------------------------------------------------------------------------------------------------------------------------------------------------------------------------------|------------------------------------------------------------------------------------------------------------------------------------------------------------------------------------------------------------------------------------------------------------------------------------------------------------------------------------------------------------------------------------------------------------------------------------------------------------------------------------------------------------------------------------------------------------------------------------------------------------------------------------------------------------------------------------------------------------------------------------------------------------------------------------------------------------------------------------------------------------------------------------------------------------------------------------------------------------------------------------------------------------------------------------------------------------------------------------------------------------------------------------------------------------------------------------------------------------------------------------------------------------------------------------------------------------------------------------------------------------------------------------------------------------------------------------------------------------------------------------------------------------------------------------------------------------------------------------------------------------------------------------------------------------------------------------------------------------------------------------------------------------------------------------------------------------------------------------------------------------------------------------------------------------------------------------------------------------------------------------------------------------------------------------------------------------------------------|
| <p><b>Q30</b></p> | <p>Ipilimumab and nivolumab are both immunotherapies known as immune checkpoint inhibitors. They work by blocking proteins that prevent immune cells from attacking cancer cells. Specifically, ipilimumab blocks the CTLA-4 protein, while nivolumab blocks the PD-1 protein.</p> <p>As of my training cut-off in September 2021, the combination of ipilimumab and nivolumab is often used as a first-line treatment for metastatic melanoma because it has been shown to improve overall survival compared to ipilimumab alone. However, the question of whether ipilimumab can benefit patients who have previously been treated with nivolumab alone is more complicated.</p> <p>A few points to consider:</p> <ol style="list-style-type: none"> <li>1. If a patient has received nivolumab and then progresses (i.e., the cancer continues to grow or spread), it might still be possible for that patient to respond to ipilimumab. However, the likelihood of this is not entirely clear, and the patient must be fit enough to tolerate potential side effects from ipilimumab, which can be more severe than those from PD-1 inhibitors like nivolumab.</li> <li>2. If a patient has received nivolumab as part of combination therapy with ipilimumab and then progresses, it's less likely that further treatment with ipilimumab will be beneficial. In this scenario, other treatment options might be considered, such as targeted therapies (if the melanoma has a BRAF mutation) or other immunotherapies.</li> <li>3. The specifics of the patient's disease, overall health, previous treatment response, and personal preferences should all be taken into account when considering further treatment with ipilimumab.</li> </ol> <p>Given the complexity of these decisions, it's essential to discuss these issues in detail with your oncologist, who will have the most up-to-date information and can provide personalized advice. As always, the field of oncology is rapidly evolving, and newer treatments or strategies may have become available since my last update.</p> | <p>Ipilimumab and nivolumab are both types of immunotherapy known as immune checkpoint inhibitors, which help to stimulate the body's immune system to attack cancer cells. Ipilimumab targets the CTLA-4 protein on immune cells, while nivolumab targets the PD-1 protein.</p> <p>As of my training cut-off in September 2021, both drugs are used in the treatment of metastatic melanoma. In many cases, they are used together as combination therapy because this approach has been shown in clinical trials to improve patient outcomes more than using either drug alone.</p> <p>However, your question seems to ask about the utility of ipilimumab in patients who have already received nivolumab as a monotherapy and, I presume, have not responded adequately or have relapsed. This is a more complex question.</p> <p>Retreatment or subsequent treatment with ipilimumab in patients who have progressed on PD-1 inhibitors like nivolumab has been studied, but the results are mixed, with some patients seeing benefit while others do not. The decision to use ipilimumab in this context would depend on various factors, including the patient's overall health status, their performance status, the side effects they experienced during treatment with nivolumab, and the specifics of their disease (such as the presence or absence of certain genetic mutations).</p> <p>It's also worth mentioning that ipilimumab can cause more severe side effects than nivolumab, so this also needs to be taken into account.</p> <p>You should have a discussion with your oncologist about the potential benefits and risks of using ipilimumab after treatment with nivolumab. Your doctor can provide the most personalized advice based on the most up-to-date scientific research and your specific circumstances.</p> <p>Please note that the field of oncology is rapidly advancing, and new treatments and strategies may have become available since my last update in September 2021.</p> | <p>Ipilimumab and nivolumab are both types of immunotherapy that belong to a class of drugs called immune checkpoint inhibitors. They work by "releasing the brakes" on the immune system, enabling it to more effectively attack cancer cells. Nivolumab targets the PD-1 protein on immune cells, while ipilimumab targets CTLA-4, a different protein that also acts as an immune checkpoint.</p> <p>As of my knowledge cutoff in September 2021, ipilimumab and nivolumab, often in combination, are considered effective treatments for metastatic melanoma. However, the specific sequence and combinations of these treatments can depend on a variety of factors, including the patient's overall health, the specifics of their cancer, and their prior treatment history.</p> <p>In terms of the role for ipilimumab in patients who have previously received nivolumab, it's important to note that response rates can vary. Some patients who do not respond to treatment with one type of checkpoint inhibitor might respond to treatment with another. However, the efficacy of this sequential treatment approach is not well established, and it could also potentially lead to increased toxicity, as ipilimumab often has more severe side effects than nivolumab.</p> <p>It's also important to consider other treatment options, such as targeted therapy (for patients whose tumors have certain mutations like BRAF) or other forms of immunotherapy.</p> <p>In summary, there might be a role for ipilimumab in metastatic melanoma patients who have previously received nivolumab, but the decision to use this approach should be individualized based on a detailed discussion with the treating oncologist considering all the factors mentioned above.</p> <p>Please note that the field of oncology is rapidly advancing, and new treatments and strategies may have become available since my last update. It's essential to discuss your treatment options with your healthcare provider, who will have the most up-to-date information.</p> |
|-------------------|-----------------------------------------------------------------------------------------------------------------------------------------------------------------------------------------------------------------------------------------------------------------------------------------------------------------------------------------------------------------------------------------------------------------------------------------------------------------------------------------------------------------------------------------------------------------------------------------------------------------------------------------------------------------------------------------------------------------------------------------------------------------------------------------------------------------------------------------------------------------------------------------------------------------------------------------------------------------------------------------------------------------------------------------------------------------------------------------------------------------------------------------------------------------------------------------------------------------------------------------------------------------------------------------------------------------------------------------------------------------------------------------------------------------------------------------------------------------------------------------------------------------------------------------------------------------------------------------------------------------------------------------------------------------------------------------------------------------------------------------------------------------------------------------------------------------------------------------------------------------------------------------------------------------------------------------------------------------------------------------------------------------------------------------------------------------------------------------------------------|-------------------------------------------------------------------------------------------------------------------------------------------------------------------------------------------------------------------------------------------------------------------------------------------------------------------------------------------------------------------------------------------------------------------------------------------------------------------------------------------------------------------------------------------------------------------------------------------------------------------------------------------------------------------------------------------------------------------------------------------------------------------------------------------------------------------------------------------------------------------------------------------------------------------------------------------------------------------------------------------------------------------------------------------------------------------------------------------------------------------------------------------------------------------------------------------------------------------------------------------------------------------------------------------------------------------------------------------------------------------------------------------------------------------------------------------------------------------------------------------------------------------------------------------------------------------------------------------------------------------------------------------------------------------------------------------------------------------------------------------------------------------------------------------------------------------------------------------------------------------------------------------------------------------------------------------------------------------------------------------------------------------------|------------------------------------------------------------------------------------------------------------------------------------------------------------------------------------------------------------------------------------------------------------------------------------------------------------------------------------------------------------------------------------------------------------------------------------------------------------------------------------------------------------------------------------------------------------------------------------------------------------------------------------------------------------------------------------------------------------------------------------------------------------------------------------------------------------------------------------------------------------------------------------------------------------------------------------------------------------------------------------------------------------------------------------------------------------------------------------------------------------------------------------------------------------------------------------------------------------------------------------------------------------------------------------------------------------------------------------------------------------------------------------------------------------------------------------------------------------------------------------------------------------------------------------------------------------------------------------------------------------------------------------------------------------------------------------------------------------------------------------------------------------------------------------------------------------------------------------------------------------------------------------------------------------------------------------------------------------------------------------------------------------------------------------------------------------------------------|

ChatGPT-4 - TOXICITIES

|            |                                                                                                                                                                                                                                                                                                                                                                                                                                                                                                                                                                                                                                                                                                                                                                                                                                                                                                                                                                                                                                                                                                                                                                                                                                                                                                                                                                                                                                                                                                                                                                   |                                                                                                                                                                                                                                                                                                                                                                                                                                                                                                                                                                                                                                                                                                                                                                                                                                                                                                                                                                                                                                                                                                                                                                                                                                                                                                                                                                                                                                                                                                                                                                                                                                                                                                                           |                                                                                                                                                                                                                                                                                                                                                                                                                                                                                                                                                                                                                                                                                                                                                                                                                                                                                                                                                                                                                                                                                                                                                                                                                                                                                                                                                                                                                                                                                                                                                                               |
|------------|-------------------------------------------------------------------------------------------------------------------------------------------------------------------------------------------------------------------------------------------------------------------------------------------------------------------------------------------------------------------------------------------------------------------------------------------------------------------------------------------------------------------------------------------------------------------------------------------------------------------------------------------------------------------------------------------------------------------------------------------------------------------------------------------------------------------------------------------------------------------------------------------------------------------------------------------------------------------------------------------------------------------------------------------------------------------------------------------------------------------------------------------------------------------------------------------------------------------------------------------------------------------------------------------------------------------------------------------------------------------------------------------------------------------------------------------------------------------------------------------------------------------------------------------------------------------|---------------------------------------------------------------------------------------------------------------------------------------------------------------------------------------------------------------------------------------------------------------------------------------------------------------------------------------------------------------------------------------------------------------------------------------------------------------------------------------------------------------------------------------------------------------------------------------------------------------------------------------------------------------------------------------------------------------------------------------------------------------------------------------------------------------------------------------------------------------------------------------------------------------------------------------------------------------------------------------------------------------------------------------------------------------------------------------------------------------------------------------------------------------------------------------------------------------------------------------------------------------------------------------------------------------------------------------------------------------------------------------------------------------------------------------------------------------------------------------------------------------------------------------------------------------------------------------------------------------------------------------------------------------------------------------------------------------------------|-------------------------------------------------------------------------------------------------------------------------------------------------------------------------------------------------------------------------------------------------------------------------------------------------------------------------------------------------------------------------------------------------------------------------------------------------------------------------------------------------------------------------------------------------------------------------------------------------------------------------------------------------------------------------------------------------------------------------------------------------------------------------------------------------------------------------------------------------------------------------------------------------------------------------------------------------------------------------------------------------------------------------------------------------------------------------------------------------------------------------------------------------------------------------------------------------------------------------------------------------------------------------------------------------------------------------------------------------------------------------------------------------------------------------------------------------------------------------------------------------------------------------------------------------------------------------------|
| <p>Q31</p> | <p>Yes, there can be risks when administering immunotherapy to a patient with latent tuberculosis (TB).</p> <p>Immunotherapies are a type of treatment that enhance or suppress the immune system to help the body fight cancer, infection, and other diseases. They are commonly used in cancer treatment. Certain immunotherapies, particularly those that suppress the immune system, might re-activate latent TB. This is because the immune system helps keep the bacteria that cause TB in check.</p> <p>The main concern comes from the use of immune checkpoint inhibitors and biological drugs that target the immune system. These medications can reactivate latent TB because they inhibit parts of the immune system that help keep the TB bacteria under control.</p> <p>The World Health Organization recommends that before starting treatment with these types of therapies, patients should be screened for TB. If latent TB is detected, treatment should be initiated before starting immunotherapy to prevent the TB from becoming active.</p> <p>However, this is a complex issue and each patient's case should be evaluated individually, taking into account the potential benefits and risks of the therapy, the presence of other co-existing conditions, and the overall state of the patient's immune system.</p> <p>Please remember that while I strive to provide accurate and current information, my responses should not replace professional medical advice. Always consult a healthcare provider for personalized advice.</p> | <p>Yes, immunotherapy could potentially pose risks to a patient with latent tuberculosis (TB).</p> <p>Immunotherapies, such as immune checkpoint inhibitors, are designed to inhibit immune checkpoints, which are regulatory mechanisms of the immune system. These immunotherapies are often used to treat cancer, as they can enhance the immune response against cancer cells. However, by altering the immune response, they can also potentially reactivate latent TB.</p> <p>Latent TB refers to a state where a person is infected with Mycobacterium tuberculosis, but the bacteria are in a dormant state and the person does not have any symptoms of TB. The bacteria are kept in check by the person's immune system. However, if the immune system becomes compromised, for example due to diseases like HIV or treatments such as chemotherapy or immunotherapy, the bacteria can become active, causing active TB disease.</p> <p>Before starting immunotherapy, patients are typically screened for latent TB. If latent TB is identified, prophylactic anti-TB therapy is typically initiated prior to starting immunotherapy to reduce the risk of reactivation.</p> <p>Despite these precautions, it's still possible for TB to reactivate during immunotherapy treatment. Therefore, patients with latent TB undergoing immunotherapy should be closely monitored for signs of active TB.</p> <p>However, please note that this is a complex issue and individual patient characteristics and the specifics of their treatment regimen may influence their risk. Therefore, any decisions regarding immunotherapy treatment should be made in consultation with a qualified healthcare provider.</p> | <p>Yes, there can be risks associated with administering immunotherapy to a patient with latent tuberculosis (TB).</p> <p>Immunotherapies work by either stimulating certain activities of the immune system or by counteracting signals produced by cancer cells that suppress immune responses. Some types of immunotherapies, particularly immune checkpoint inhibitors such as drugs targeting PD-1 or PD-L1, can lead to an overactive immune response. This can potentially result in the reactivation of latent TB.</p> <p>In latent TB, the bacteria exist in the body in an inactive state and cause no symptoms, as they are kept under control by the immune system. If the immune system is altered or suppressed - by immunosuppressive drugs, immunotherapies, or certain medical conditions like HIV - the bacteria might become active, leading to TB disease.</p> <p>Before starting immunotherapy, it's often recommended to screen patients for latent TB. If a patient tests positive, they are typically treated to eradicate the latent TB infection prior to initiating immunotherapy.</p> <p>The risk of TB reactivation with immunotherapy underscores the importance of a thorough medical history, physical examination, and appropriate screening before beginning therapy.</p> <p>Please note that while I strive to provide accurate information, you should always consult a healthcare provider for medical advice. The decision to initiate immunotherapy treatment must be individualized and balance potential benefits against risks.</p> |
|------------|-------------------------------------------------------------------------------------------------------------------------------------------------------------------------------------------------------------------------------------------------------------------------------------------------------------------------------------------------------------------------------------------------------------------------------------------------------------------------------------------------------------------------------------------------------------------------------------------------------------------------------------------------------------------------------------------------------------------------------------------------------------------------------------------------------------------------------------------------------------------------------------------------------------------------------------------------------------------------------------------------------------------------------------------------------------------------------------------------------------------------------------------------------------------------------------------------------------------------------------------------------------------------------------------------------------------------------------------------------------------------------------------------------------------------------------------------------------------------------------------------------------------------------------------------------------------|---------------------------------------------------------------------------------------------------------------------------------------------------------------------------------------------------------------------------------------------------------------------------------------------------------------------------------------------------------------------------------------------------------------------------------------------------------------------------------------------------------------------------------------------------------------------------------------------------------------------------------------------------------------------------------------------------------------------------------------------------------------------------------------------------------------------------------------------------------------------------------------------------------------------------------------------------------------------------------------------------------------------------------------------------------------------------------------------------------------------------------------------------------------------------------------------------------------------------------------------------------------------------------------------------------------------------------------------------------------------------------------------------------------------------------------------------------------------------------------------------------------------------------------------------------------------------------------------------------------------------------------------------------------------------------------------------------------------------|-------------------------------------------------------------------------------------------------------------------------------------------------------------------------------------------------------------------------------------------------------------------------------------------------------------------------------------------------------------------------------------------------------------------------------------------------------------------------------------------------------------------------------------------------------------------------------------------------------------------------------------------------------------------------------------------------------------------------------------------------------------------------------------------------------------------------------------------------------------------------------------------------------------------------------------------------------------------------------------------------------------------------------------------------------------------------------------------------------------------------------------------------------------------------------------------------------------------------------------------------------------------------------------------------------------------------------------------------------------------------------------------------------------------------------------------------------------------------------------------------------------------------------------------------------------------------------|

|                   |                                                                                                                                                                                                                                                                                                                                                                                                                                                                                                                                                                                                                                                                                                                                                                                                                                                                                                                                                                                                                                                                                                                                                                                                                                                                                                                                                                                                                                                                                                                                                                                                                                                                                                                                                                                                                                                                                                                                                                                 |                                                                                                                                                                                                                                                                                                                                                                                                                                                                                                                                                                                                                                                                                                                                                                                                                                                                                                                                                                                                                                                                                                                                                                                                                                                                                                                                                                                                                                                                                                                                                                                                                                                                                                                                                                                                                                                                                                                                                                                                                                                                                                                                          |                                                                                                                                                                                                                                                                                                                                                                                                                                                                                                                                                                                                                                                                                                                                                                                                                                                                                                                                                                                                                                                                                                                                                                                                                                                                                                                                                                                                                                                                                                                                                                                                                                                                                                                                                                                                                                                                                                                                                                                                                                                                                                                                 |
|-------------------|---------------------------------------------------------------------------------------------------------------------------------------------------------------------------------------------------------------------------------------------------------------------------------------------------------------------------------------------------------------------------------------------------------------------------------------------------------------------------------------------------------------------------------------------------------------------------------------------------------------------------------------------------------------------------------------------------------------------------------------------------------------------------------------------------------------------------------------------------------------------------------------------------------------------------------------------------------------------------------------------------------------------------------------------------------------------------------------------------------------------------------------------------------------------------------------------------------------------------------------------------------------------------------------------------------------------------------------------------------------------------------------------------------------------------------------------------------------------------------------------------------------------------------------------------------------------------------------------------------------------------------------------------------------------------------------------------------------------------------------------------------------------------------------------------------------------------------------------------------------------------------------------------------------------------------------------------------------------------------|------------------------------------------------------------------------------------------------------------------------------------------------------------------------------------------------------------------------------------------------------------------------------------------------------------------------------------------------------------------------------------------------------------------------------------------------------------------------------------------------------------------------------------------------------------------------------------------------------------------------------------------------------------------------------------------------------------------------------------------------------------------------------------------------------------------------------------------------------------------------------------------------------------------------------------------------------------------------------------------------------------------------------------------------------------------------------------------------------------------------------------------------------------------------------------------------------------------------------------------------------------------------------------------------------------------------------------------------------------------------------------------------------------------------------------------------------------------------------------------------------------------------------------------------------------------------------------------------------------------------------------------------------------------------------------------------------------------------------------------------------------------------------------------------------------------------------------------------------------------------------------------------------------------------------------------------------------------------------------------------------------------------------------------------------------------------------------------------------------------------------------------|---------------------------------------------------------------------------------------------------------------------------------------------------------------------------------------------------------------------------------------------------------------------------------------------------------------------------------------------------------------------------------------------------------------------------------------------------------------------------------------------------------------------------------------------------------------------------------------------------------------------------------------------------------------------------------------------------------------------------------------------------------------------------------------------------------------------------------------------------------------------------------------------------------------------------------------------------------------------------------------------------------------------------------------------------------------------------------------------------------------------------------------------------------------------------------------------------------------------------------------------------------------------------------------------------------------------------------------------------------------------------------------------------------------------------------------------------------------------------------------------------------------------------------------------------------------------------------------------------------------------------------------------------------------------------------------------------------------------------------------------------------------------------------------------------------------------------------------------------------------------------------------------------------------------------------------------------------------------------------------------------------------------------------------------------------------------------------------------------------------------------------|
| <p><b>Q32</b></p> | <p>As of my knowledge cutoff in September 2021, research suggested that immunotherapy could be safe and effective in patients with well-controlled HIV who are receiving antiretroviral therapy. However, it's important to note that the data were somewhat limited due to the exclusion of patients with HIV from many clinical trials.</p> <p>HIV patients often have compromised immune systems, which makes the safety profile and effectiveness of immunotherapy potentially different for them compared to patients without HIV. Yet, if a patient's HIV is well-controlled with antiretroviral therapy and their immune status is relatively normal (as evidenced by a good CD4 cell count and an undetectable viral load), they might tolerate immunotherapy similarly to individuals without HIV. Additionally, with the advent of effective antiretroviral therapy, patients with HIV are living longer and may therefore develop diseases like cancer that require such treatments.</p> <p>Immunotherapies, such as immune checkpoint inhibitors, have shown promise in treating certain cancers in the general population. Some research suggests this may also be true for patients with well-controlled HIV, but more data is needed to confirm these findings.</p> <p>It's also important to note that certain immunotherapies could potentially increase HIV replication, even in patients with previously well-controlled HIV. This risk needs to be weighed against the potential benefits of the treatment.</p> <p>Given these factors, the decision to use immunotherapy in a patient with well-controlled HIV should be individualized and made after a careful discussion between the patient and their healthcare provider, weighing the potential risks and benefits.</p> <p>Please consult the most recent guidelines and a healthcare provider for the most current and applicable information, as this is a rapidly evolving field of research.</p> | <p>As of my last training cut-off in September 2021, immunotherapy was considered a potentially safe and effective treatment option for certain cancers in patients with well-controlled HIV receiving antiretroviral therapy (ART). However, the evidence base is still emerging due to the exclusion of people living with HIV from many early clinical trials of immunotherapy.</p> <p>For a long time, people with HIV were not included in most clinical trials because of concerns about their immune status and the potential for drug interactions. However, the advent of antiretroviral therapy has significantly improved the health and life expectancy of people living with HIV, and there is an increasing recognition of the need to include these individuals in clinical trials.</p> <p>There is some evidence suggesting that immune checkpoint inhibitors, a type of immunotherapy, can be effective and reasonably safe in people with HIV who have cancers such as non-small-cell lung cancer, melanoma, and others. As long as the person's HIV is well-controlled (meaning they have an undetectable viral load and their CD4 cell count is stable), these treatments can potentially be used.</p> <p>However, while the outcomes look promising, there are also potential risks. These include the possibility that immunotherapy could increase HIV replication or cause immune reconstitution inflammatory syndrome (IRIS), a condition seen in some people after starting antiretroviral therapy where the immune system responds to previously acquired opportunistic infections with an overwhelming inflammatory response that can worsen disease symptoms.</p> <p>Given the complex nature of these decisions, any individual with well-controlled HIV and cancer considering immunotherapy should have a discussion with their healthcare provider about the potential benefits and risks.</p> <p>Please consult with healthcare professionals for the most current information, as this field is rapidly evolving and newer data might be available after my last training data in September 2021.</p> | <p>As of my last training cut-off in September 2021, there's growing evidence suggesting that immunotherapy might be safe and effective for cancer patients with well-controlled HIV who are receiving antiretroviral therapy (ART). However, this is a rapidly evolving area of research, and further studies are needed to confirm these findings and to establish comprehensive guidelines.</p> <p>Traditionally, people living with HIV were excluded from most cancer immunotherapy clinical trials due to concerns about their immune status and the potential for drug interactions. However, with the advent of effective ART, patients with well-controlled HIV have immune systems that are often able to handle such treatments, and they are now being included in some studies.</p> <p>A few studies as of 2021 had started to suggest that cancer immunotherapy, particularly immune checkpoint inhibitors, might be both safe and effective in patients with well-controlled HIV. These studies suggested that HIV-positive patients, with a well-preserved immune function, may respond to immunotherapy in a similar way to HIV-negative patients, and the treatment does not appear to worsen HIV infection.</p> <p>However, these findings need to be interpreted with caution until larger, randomized controlled trials can confirm them. Additionally, the interplay between HIV, the immune system, cancer, and immunotherapy is complex. There's still a lot to learn about potential unique side effects or challenges in this population, such as potential interactions between ART and immunotherapy, or the risk of immune reconstitution inflammatory syndrome (IRIS).</p> <p>The decision to use immunotherapy in a patient with well-controlled HIV should be individualized and made in collaboration with an experienced healthcare team, considering the potential risks and benefits and the specifics of the patient's condition.</p> <p>Given the rapidly evolving nature of this field, it's recommended to seek advice from a healthcare provider for the most current information.</p> |
|-------------------|---------------------------------------------------------------------------------------------------------------------------------------------------------------------------------------------------------------------------------------------------------------------------------------------------------------------------------------------------------------------------------------------------------------------------------------------------------------------------------------------------------------------------------------------------------------------------------------------------------------------------------------------------------------------------------------------------------------------------------------------------------------------------------------------------------------------------------------------------------------------------------------------------------------------------------------------------------------------------------------------------------------------------------------------------------------------------------------------------------------------------------------------------------------------------------------------------------------------------------------------------------------------------------------------------------------------------------------------------------------------------------------------------------------------------------------------------------------------------------------------------------------------------------------------------------------------------------------------------------------------------------------------------------------------------------------------------------------------------------------------------------------------------------------------------------------------------------------------------------------------------------------------------------------------------------------------------------------------------------|------------------------------------------------------------------------------------------------------------------------------------------------------------------------------------------------------------------------------------------------------------------------------------------------------------------------------------------------------------------------------------------------------------------------------------------------------------------------------------------------------------------------------------------------------------------------------------------------------------------------------------------------------------------------------------------------------------------------------------------------------------------------------------------------------------------------------------------------------------------------------------------------------------------------------------------------------------------------------------------------------------------------------------------------------------------------------------------------------------------------------------------------------------------------------------------------------------------------------------------------------------------------------------------------------------------------------------------------------------------------------------------------------------------------------------------------------------------------------------------------------------------------------------------------------------------------------------------------------------------------------------------------------------------------------------------------------------------------------------------------------------------------------------------------------------------------------------------------------------------------------------------------------------------------------------------------------------------------------------------------------------------------------------------------------------------------------------------------------------------------------------------|---------------------------------------------------------------------------------------------------------------------------------------------------------------------------------------------------------------------------------------------------------------------------------------------------------------------------------------------------------------------------------------------------------------------------------------------------------------------------------------------------------------------------------------------------------------------------------------------------------------------------------------------------------------------------------------------------------------------------------------------------------------------------------------------------------------------------------------------------------------------------------------------------------------------------------------------------------------------------------------------------------------------------------------------------------------------------------------------------------------------------------------------------------------------------------------------------------------------------------------------------------------------------------------------------------------------------------------------------------------------------------------------------------------------------------------------------------------------------------------------------------------------------------------------------------------------------------------------------------------------------------------------------------------------------------------------------------------------------------------------------------------------------------------------------------------------------------------------------------------------------------------------------------------------------------------------------------------------------------------------------------------------------------------------------------------------------------------------------------------------------------|

|            |                                                                                                                                                                                                                                                                                                                                                                                                                                                                                                                                                                                                                                                                                                                                                                                                                                                                                                                                                                                                                                                                                                                                                                                                                                                                                                                                                                                |                                                                                                                                                                                                                                                                                                                                                                                                                                                                                                                                                                                                                                                                                                                                                                                                                                                                                                                                                                                                                                                                                                                                                                                                                                                                                                                                                                                                                                                                                         |                                                                                                                                                                                                                                                                                                                                                                                                                                                                                                                                                                                                                                                                                                                                                                                                                                                                                                                                                                                                                                                                                                                                                                                                                                                                                                                                                                                                                                                                                                                                                                                                                          |
|------------|--------------------------------------------------------------------------------------------------------------------------------------------------------------------------------------------------------------------------------------------------------------------------------------------------------------------------------------------------------------------------------------------------------------------------------------------------------------------------------------------------------------------------------------------------------------------------------------------------------------------------------------------------------------------------------------------------------------------------------------------------------------------------------------------------------------------------------------------------------------------------------------------------------------------------------------------------------------------------------------------------------------------------------------------------------------------------------------------------------------------------------------------------------------------------------------------------------------------------------------------------------------------------------------------------------------------------------------------------------------------------------|-----------------------------------------------------------------------------------------------------------------------------------------------------------------------------------------------------------------------------------------------------------------------------------------------------------------------------------------------------------------------------------------------------------------------------------------------------------------------------------------------------------------------------------------------------------------------------------------------------------------------------------------------------------------------------------------------------------------------------------------------------------------------------------------------------------------------------------------------------------------------------------------------------------------------------------------------------------------------------------------------------------------------------------------------------------------------------------------------------------------------------------------------------------------------------------------------------------------------------------------------------------------------------------------------------------------------------------------------------------------------------------------------------------------------------------------------------------------------------------------|--------------------------------------------------------------------------------------------------------------------------------------------------------------------------------------------------------------------------------------------------------------------------------------------------------------------------------------------------------------------------------------------------------------------------------------------------------------------------------------------------------------------------------------------------------------------------------------------------------------------------------------------------------------------------------------------------------------------------------------------------------------------------------------------------------------------------------------------------------------------------------------------------------------------------------------------------------------------------------------------------------------------------------------------------------------------------------------------------------------------------------------------------------------------------------------------------------------------------------------------------------------------------------------------------------------------------------------------------------------------------------------------------------------------------------------------------------------------------------------------------------------------------------------------------------------------------------------------------------------------------|
| <p>Q33</p> | <p>The symptoms you're describing—weight loss, tremulousness, anxiety, diarrhea, feeling warm all the time, along with clinical signs of a fine tremor and proptosis—suggest that the patient may have developed hyperthyroidism, specifically Graves' disease.</p> <p>Graves' disease is an autoimmune condition that results in overproduction of thyroid hormones (hyperthyroidism). Its symptoms include anxiety, tremors, weight loss despite normal or increased appetite, heat intolerance, frequent bowel movements or diarrhea, and bulging eyes (proptosis or exophthalmos).</p> <p>These symptoms could also be a manifestation of an immune-related adverse event (irAE) from nivolumab, a PD-1 inhibitor used in cancer immunotherapy. PD-1 inhibitors can sometimes lead to autoimmune conditions, including thyroid dysfunction. In many cases, the dysfunction first presents as thyroiditis, which may manifest initially with symptoms of hyperthyroidism, potentially followed by hypothyroidism. Therefore, the symptoms could also be due to thyroiditis related to her immunotherapy.</p> <p>It's crucial to get a thorough evaluation, including thyroid function tests and possibly imaging or a consultation with an endocrinologist, to confirm the diagnosis and guide treatment. Please ensure this patient seeks immediate medical attention.</p> | <p>The symptoms described are characteristic of hyperthyroidism, and the proptosis (bulging of the eyes) is suggestive of Graves' disease, a type of autoimmune hyperthyroidism.</p> <p>However, considering the patient is on Nivolumab, an immune checkpoint inhibitor used in cancer treatment, the cause of hyperthyroidism could also be an immune-related adverse event (irAE). Nivolumab works by blocking the programmed cell death-1 (PD-1) pathway, enhancing the body's immune response against cancer cells. Still, by doing this, it can also lead to an overactive immune response against normal tissues, including the thyroid gland. This can result in inflammatory conditions such as thyroiditis, which can initially present with symptoms of hyperthyroidism due to leakage of thyroid hormone from the inflamed gland.</p> <p>So, in this case, while the symptoms are consistent with hyperthyroidism, the exact cause - whether it's Graves' disease, thyroiditis, or another cause - should be confirmed through further tests, such as thyroid function tests and possibly imaging or referral to an endocrinologist. It's also important to closely monitor the patient's symptoms and adjust the treatment plan as necessary, which may include managing the hyperthyroidism, temporarily withholding the immunotherapy, or using corticosteroids or other immunosuppressants.</p> <p>Please advise the patient to seek medical attention immediately.</p> | <p>The symptoms described in the patient -- weight loss, tremulousness, anxiety, diarrhea, increased sensitivity to heat, a fine tremor, and proptosis (bulging eyes) -- are consistent with hyperthyroidism.</p> <p>In the context of receiving Nivolumab, a type of immunotherapy known as a checkpoint inhibitor, these symptoms could be the result of an immune-related adverse event (irAE). Nivolumab works by blocking a pathway that normally inhibits the immune system, allowing the immune system to more strongly react against cancer cells. However, this increased immune response can sometimes result in the immune system attacking normal tissues, including the thyroid gland, leading to thyroid dysfunction.</p> <p>The initial phase of inflammation in the thyroid (thyroiditis) can often lead to a transient hyperthyroidism as preformed thyroid hormone is released into the bloodstream. This can be followed by a phase of hypothyroidism as the thyroid's hormone-producing capacity has been damaged by the inflammation. If the thyroid fails to recover normal function, this hypothyroidism can be permanent.</p> <p>Graves' disease, an autoimmune disease where the immune system stimulates the thyroid to make too much thyroid hormone, could also cause these symptoms, including the eye changes.</p> <p>It is crucial for this patient to seek medical care. A healthcare provider can order appropriate tests, such as thyroid function tests, and interpret them in the context of the patient's symptoms and medical history to make a diagnosis and guide treatment.</p> |
|------------|--------------------------------------------------------------------------------------------------------------------------------------------------------------------------------------------------------------------------------------------------------------------------------------------------------------------------------------------------------------------------------------------------------------------------------------------------------------------------------------------------------------------------------------------------------------------------------------------------------------------------------------------------------------------------------------------------------------------------------------------------------------------------------------------------------------------------------------------------------------------------------------------------------------------------------------------------------------------------------------------------------------------------------------------------------------------------------------------------------------------------------------------------------------------------------------------------------------------------------------------------------------------------------------------------------------------------------------------------------------------------------|-----------------------------------------------------------------------------------------------------------------------------------------------------------------------------------------------------------------------------------------------------------------------------------------------------------------------------------------------------------------------------------------------------------------------------------------------------------------------------------------------------------------------------------------------------------------------------------------------------------------------------------------------------------------------------------------------------------------------------------------------------------------------------------------------------------------------------------------------------------------------------------------------------------------------------------------------------------------------------------------------------------------------------------------------------------------------------------------------------------------------------------------------------------------------------------------------------------------------------------------------------------------------------------------------------------------------------------------------------------------------------------------------------------------------------------------------------------------------------------------|--------------------------------------------------------------------------------------------------------------------------------------------------------------------------------------------------------------------------------------------------------------------------------------------------------------------------------------------------------------------------------------------------------------------------------------------------------------------------------------------------------------------------------------------------------------------------------------------------------------------------------------------------------------------------------------------------------------------------------------------------------------------------------------------------------------------------------------------------------------------------------------------------------------------------------------------------------------------------------------------------------------------------------------------------------------------------------------------------------------------------------------------------------------------------------------------------------------------------------------------------------------------------------------------------------------------------------------------------------------------------------------------------------------------------------------------------------------------------------------------------------------------------------------------------------------------------------------------------------------------------|

|            |                                                                                                                                                                                                                                                                                                                                                                                                                                                                                                                                                                                                                                                                                                                                                                                                                                                                                                                                                                                                                                                                                                                                                                                                                                                                                                                                                                                                                                                                                                                                                                                                                                                                                                                                                                                                                                                                                                                                                                                                                                                                                                                                                                                                                                                      |                                                                                                                                                                                                                                                                                                                                                                                                                                                                                                                                                                                                                                                                                                                                                                                                                                                                                                                                                                                                                                                                                                                                                                                                                                                                                                                                                                                                                                                                                                                                                                                                                                                                                                                                                                                                                                                                                                                                                                                                                              |                                                                                                                                                                                                                                                                                                                                                                                                                                                                                                                                                                                                                                                                                                                                                                                                                                                                                                                                                                                                                                                                                                                                                                                                                                                                                                                                                                                                                                                                                                                                                                                                                                                                                                                                                                              |
|------------|------------------------------------------------------------------------------------------------------------------------------------------------------------------------------------------------------------------------------------------------------------------------------------------------------------------------------------------------------------------------------------------------------------------------------------------------------------------------------------------------------------------------------------------------------------------------------------------------------------------------------------------------------------------------------------------------------------------------------------------------------------------------------------------------------------------------------------------------------------------------------------------------------------------------------------------------------------------------------------------------------------------------------------------------------------------------------------------------------------------------------------------------------------------------------------------------------------------------------------------------------------------------------------------------------------------------------------------------------------------------------------------------------------------------------------------------------------------------------------------------------------------------------------------------------------------------------------------------------------------------------------------------------------------------------------------------------------------------------------------------------------------------------------------------------------------------------------------------------------------------------------------------------------------------------------------------------------------------------------------------------------------------------------------------------------------------------------------------------------------------------------------------------------------------------------------------------------------------------------------------------|------------------------------------------------------------------------------------------------------------------------------------------------------------------------------------------------------------------------------------------------------------------------------------------------------------------------------------------------------------------------------------------------------------------------------------------------------------------------------------------------------------------------------------------------------------------------------------------------------------------------------------------------------------------------------------------------------------------------------------------------------------------------------------------------------------------------------------------------------------------------------------------------------------------------------------------------------------------------------------------------------------------------------------------------------------------------------------------------------------------------------------------------------------------------------------------------------------------------------------------------------------------------------------------------------------------------------------------------------------------------------------------------------------------------------------------------------------------------------------------------------------------------------------------------------------------------------------------------------------------------------------------------------------------------------------------------------------------------------------------------------------------------------------------------------------------------------------------------------------------------------------------------------------------------------------------------------------------------------------------------------------------------------|------------------------------------------------------------------------------------------------------------------------------------------------------------------------------------------------------------------------------------------------------------------------------------------------------------------------------------------------------------------------------------------------------------------------------------------------------------------------------------------------------------------------------------------------------------------------------------------------------------------------------------------------------------------------------------------------------------------------------------------------------------------------------------------------------------------------------------------------------------------------------------------------------------------------------------------------------------------------------------------------------------------------------------------------------------------------------------------------------------------------------------------------------------------------------------------------------------------------------------------------------------------------------------------------------------------------------------------------------------------------------------------------------------------------------------------------------------------------------------------------------------------------------------------------------------------------------------------------------------------------------------------------------------------------------------------------------------------------------------------------------------------------------|
| <p>Q34</p> | <p>Pembrolizumab is an immune checkpoint inhibitor that targets the PD-1 receptor and is used to treat a variety of cancers. However, it can lead to immune-related adverse events (irAEs), one of which is colitis.</p> <p>In managing pembrolizumab-induced colitis, the first step is typically to hold the immunotherapy. This is because continued exposure could potentially worsen the colitis.</p> <p>The severity of the symptoms will guide further management. Given the symptoms of this patient -- with eight bowel movements per day, dehydration, and fecal incontinence -- the colitis would likely be considered moderate to severe.</p> <p>In cases of moderate to severe colitis, the first-line treatment is usually systemic corticosteroids. Prednisone or an equivalent corticosteroid is typically given at a dose of 1-2 mg/kg/day.</p> <p>If symptoms improve within about 3 days, the corticosteroid dose is gradually tapered over at least 4 weeks. If symptoms don't improve or if they worsen, the patient may need to be treated with infliximab or another immunosuppressant.</p> <p>Along with systemic treatment, symptomatic treatment for dehydration and electrolyte imbalances is essential, often requiring intravenous fluids.</p> <p>Because these situations can become critical quickly, hospitalization is often required for close monitoring and management, especially in severe cases or cases that don't improve with initial treatment.</p> <p>While this provides a general guideline, it's essential to remember that each patient's situation can be different, and the management plan may need to be adjusted based on the patient's overall condition, other underlying illnesses, and the response to treatment. All management should be guided by a healthcare professional.</p> <p>Lastly, while it's crucial to manage these acute symptoms, the long-term management plan for the patient's cancer therapy will also need to be considered. This might include discussions about the risks and benefits of resuming immunotherapy once the colitis is controlled. These decisions should be made in consultation with the patient's oncologist and possibly a gastroenterologist.</p> | <p>Pembrolizumab is an immune checkpoint inhibitor that can occasionally lead to immune-related adverse events (irAEs), including colitis. The symptoms you've described, including multiple bowel movements per day, dehydration, and fecal incontinence, suggest a case of moderate to severe colitis.</p> <p>The first step in the management of pembrolizumab-induced colitis is to hold or discontinue the immunotherapy, depending on the severity and clinical context.</p> <p>For moderate to severe symptoms like the ones described, the general recommendation is to initiate systemic corticosteroids. This is typically done with a course of prednisone (or equivalent) at a dosage of 1-2 mg/kg/day. In some cases, intravenous (IV) corticosteroids may be used, especially if the patient is unable to tolerate oral medications due to their symptoms or has severe dehydration.</p> <p>If the patient's symptoms improve within a few days of corticosteroid treatment, the dose is usually tapered gradually over a period of at least 4-6 weeks. If symptoms don't improve or worsen despite this treatment, other immunosuppressive agents such as infliximab (a TNF-alpha inhibitor) may be considered.</p> <p>In the case of significant dehydration, intravenous fluid rehydration might be necessary, and hospital admission should be considered for close monitoring and supportive care.</p> <p>The management of pembrolizumab-induced colitis can be complex and should involve a multidisciplinary team, including oncologists and gastroenterologists. It is also important to consider the overall health status of the patient and the potential benefits of continuing pembrolizumab treatment once the colitis is controlled, weighed against the risks of recurrent irAEs.</p> <p>This patient should seek immediate medical care. The information provided here is general in nature, and specific treatment decisions should be made in consultation with a healthcare provider.</p> | <p>Pembrolizumab, a PD-1 inhibitor, can cause immune-related adverse events (irAEs), including colitis. Symptoms of colitis can range from mild to severe and include diarrhea, blood or mucus in stool, abdominal pain, fever, and in some cases, life-threatening complications.</p> <p>In the scenario you described where the patient has eight bowel movements per day, dehydration, and fecal incontinence, the colitis would likely be classified as moderate to severe.</p> <p>The first step in managing pembrolizumab-induced colitis is typically to discontinue the drug. For moderate to severe cases, the first-line treatment generally involves high-dose corticosteroids, such as prednisone or methylprednisolone, usually given at a dose of 1-2 mg/kg/day.</p> <p>Treatment response should be monitored, and if symptoms improve within a few days, the corticosteroids can be tapered slowly over several weeks.</p> <p>However, if symptoms don't improve within 3-5 days or if they worsen despite the use of corticosteroids, additional therapy might be needed. Infliximab, a tumor necrosis factor-alpha (TNF-<math>\alpha</math>) blocker, is often considered in such cases.</p> <p>Supportive care, including rehydration and electrolyte replenishment, is also an important part of the treatment plan, and hospitalization may be required for close monitoring and management.</p> <p>This is a general approach, but the specific treatment plan can depend on various factors, including the patient's overall health status, the severity of the colitis, and the presence of other comorbidities. It's crucial for this patient to seek immediate medical care and to follow the treatment guidance of their healthcare provider.</p> |
|------------|------------------------------------------------------------------------------------------------------------------------------------------------------------------------------------------------------------------------------------------------------------------------------------------------------------------------------------------------------------------------------------------------------------------------------------------------------------------------------------------------------------------------------------------------------------------------------------------------------------------------------------------------------------------------------------------------------------------------------------------------------------------------------------------------------------------------------------------------------------------------------------------------------------------------------------------------------------------------------------------------------------------------------------------------------------------------------------------------------------------------------------------------------------------------------------------------------------------------------------------------------------------------------------------------------------------------------------------------------------------------------------------------------------------------------------------------------------------------------------------------------------------------------------------------------------------------------------------------------------------------------------------------------------------------------------------------------------------------------------------------------------------------------------------------------------------------------------------------------------------------------------------------------------------------------------------------------------------------------------------------------------------------------------------------------------------------------------------------------------------------------------------------------------------------------------------------------------------------------------------------------|------------------------------------------------------------------------------------------------------------------------------------------------------------------------------------------------------------------------------------------------------------------------------------------------------------------------------------------------------------------------------------------------------------------------------------------------------------------------------------------------------------------------------------------------------------------------------------------------------------------------------------------------------------------------------------------------------------------------------------------------------------------------------------------------------------------------------------------------------------------------------------------------------------------------------------------------------------------------------------------------------------------------------------------------------------------------------------------------------------------------------------------------------------------------------------------------------------------------------------------------------------------------------------------------------------------------------------------------------------------------------------------------------------------------------------------------------------------------------------------------------------------------------------------------------------------------------------------------------------------------------------------------------------------------------------------------------------------------------------------------------------------------------------------------------------------------------------------------------------------------------------------------------------------------------------------------------------------------------------------------------------------------------|------------------------------------------------------------------------------------------------------------------------------------------------------------------------------------------------------------------------------------------------------------------------------------------------------------------------------------------------------------------------------------------------------------------------------------------------------------------------------------------------------------------------------------------------------------------------------------------------------------------------------------------------------------------------------------------------------------------------------------------------------------------------------------------------------------------------------------------------------------------------------------------------------------------------------------------------------------------------------------------------------------------------------------------------------------------------------------------------------------------------------------------------------------------------------------------------------------------------------------------------------------------------------------------------------------------------------------------------------------------------------------------------------------------------------------------------------------------------------------------------------------------------------------------------------------------------------------------------------------------------------------------------------------------------------------------------------------------------------------------------------------------------------|

|                   |                                                                                                                                                                                                                                                                                                                                                                                                                                                                                                                                                                                                                                                                                                                                                                                                                                                                                                                                                                                                                                                                                                                                                                                                                                                                                                                                                                                                                                                                                                            |                                                                                                                                                                                                                                                                                                                                                                                                                                                                                                                                                                                                                                                                                                                                                                                                                                                                                                                                                                                                                                                                                                                                                                                                                                                                                                                                                                                                                                                                                                                                                                                                                        |                                                                                                                                                                                                                                                                                                                                                                                                                                                                                                                                                                                                                                                                                                                                                                                                                                                                                                                                                                                                                                                                                                                                                                                                                                                                                                                                                                                            |
|-------------------|------------------------------------------------------------------------------------------------------------------------------------------------------------------------------------------------------------------------------------------------------------------------------------------------------------------------------------------------------------------------------------------------------------------------------------------------------------------------------------------------------------------------------------------------------------------------------------------------------------------------------------------------------------------------------------------------------------------------------------------------------------------------------------------------------------------------------------------------------------------------------------------------------------------------------------------------------------------------------------------------------------------------------------------------------------------------------------------------------------------------------------------------------------------------------------------------------------------------------------------------------------------------------------------------------------------------------------------------------------------------------------------------------------------------------------------------------------------------------------------------------------|------------------------------------------------------------------------------------------------------------------------------------------------------------------------------------------------------------------------------------------------------------------------------------------------------------------------------------------------------------------------------------------------------------------------------------------------------------------------------------------------------------------------------------------------------------------------------------------------------------------------------------------------------------------------------------------------------------------------------------------------------------------------------------------------------------------------------------------------------------------------------------------------------------------------------------------------------------------------------------------------------------------------------------------------------------------------------------------------------------------------------------------------------------------------------------------------------------------------------------------------------------------------------------------------------------------------------------------------------------------------------------------------------------------------------------------------------------------------------------------------------------------------------------------------------------------------------------------------------------------------|--------------------------------------------------------------------------------------------------------------------------------------------------------------------------------------------------------------------------------------------------------------------------------------------------------------------------------------------------------------------------------------------------------------------------------------------------------------------------------------------------------------------------------------------------------------------------------------------------------------------------------------------------------------------------------------------------------------------------------------------------------------------------------------------------------------------------------------------------------------------------------------------------------------------------------------------------------------------------------------------------------------------------------------------------------------------------------------------------------------------------------------------------------------------------------------------------------------------------------------------------------------------------------------------------------------------------------------------------------------------------------------------|
| <p><b>Q35</b></p> | <p>The patient's symptoms of progressive, patchy skin whitening without itchiness or ulceration could be suggestive of vitiligo. Vitiligo is a condition in which the skin loses melanin, the pigment that determines skin, hair, and eye color, causing light or white patches to appear.</p> <p>Interestingly, the development of vitiligo in patients receiving immune checkpoint inhibitors like Ipilimumab (a CTLA-4 inhibitor) and Nivolumab (a PD-1 inhibitor) for metastatic melanoma has been observed in clinical practice and studies. The vitiligo is thought to occur because the treatments enhance the immune system's ability to recognize and destroy melanoma cells. Because normal melanocytes (the skin cells that produce melanin) share some features with melanoma cells, the immune system can sometimes also attack the normal melanocytes, leading to vitiligo.</p> <p>While this condition may be cosmetically concerning for patients, some studies suggest that the development of vitiligo in patients with melanoma receiving immunotherapy might be associated with a better therapeutic response to treatment.</p> <p>Nevertheless, a healthcare provider should evaluate any new skin changes in a patient receiving immunotherapy, to rule out other potential causes, such as skin infections or drug reactions. It's essential to refer this patient to a dermatologist for a comprehensive evaluation and potential management options if vitiligo is confirmed.</p> | <p>The symptoms described—progressive, patchy whitening of the skin without itchiness or ulceration—suggest a likely diagnosis of vitiligo.</p> <p>Vitiligo is a condition in which the skin loses its pigment cells (melanocytes), resulting in discolored patches in different areas of the body. It's typically most noticeable on the skin, but can also affect the hair and the inside of the mouth.</p> <p>Interestingly, vitiligo has been reported in patients receiving immunotherapies, such as ipilimumab and nivolumab, for melanoma. This may be because these immunotherapies work by enhancing the immune system's response to melanoma cells. However, this increased immune response can also lead to an attack on normal melanocytes, causing vitiligo.</p> <p>It is also worth noting that, although the appearance of vitiligo might be concerning to patients, some research suggests that the development of vitiligo in melanoma patients treated with immunotherapy may be associated with a better response to treatment. The theory is that the same immune response that attacks normal melanocytes (causing vitiligo) also attacks melanoma cells more effectively.</p> <p>Regardless, any new skin changes in patients receiving these treatments should be evaluated by a healthcare provider. Further diagnostic tests may be necessary to confirm the diagnosis and to rule out other potential causes. Additionally, patients should be referred to a dermatologist for further management, which can include cosmetic options to improve the appearance of the skin, if desired.</p> | <p>The symptoms of progressive, patchy whitening of the skin in this patient receiving Ipilimumab and Nivolumab for metastatic melanoma are suggestive of vitiligo.</p> <p>Vitiligo is a skin condition in which the loss of melanocytes (the cells that produce the pigment melanin) leads to the development of white patches of skin. This can occur anywhere on the body and is typically permanent.</p> <p>Interestingly, vitiligo has been reported in melanoma patients undergoing treatment with immune checkpoint inhibitors like Ipilimumab and Nivolumab. This is likely because these treatments enhance the immune response against melanoma cells, but in doing so, may also stimulate the immune system to attack normal melanocytes, leading to the development of vitiligo.</p> <p>While the appearance of vitiligo may be distressing to some patients, it's worth noting that the development of this condition in patients undergoing immunotherapy for melanoma has been associated with a better response to the treatment.</p> <p>Nevertheless, new skin changes in patients receiving immunotherapy should always be evaluated by a healthcare provider. A dermatologist should confirm this diagnosis and could provide further management options, which may include treatments to help even out the skin tone if the patient finds the vitiligo bothersome.</p> |
|-------------------|------------------------------------------------------------------------------------------------------------------------------------------------------------------------------------------------------------------------------------------------------------------------------------------------------------------------------------------------------------------------------------------------------------------------------------------------------------------------------------------------------------------------------------------------------------------------------------------------------------------------------------------------------------------------------------------------------------------------------------------------------------------------------------------------------------------------------------------------------------------------------------------------------------------------------------------------------------------------------------------------------------------------------------------------------------------------------------------------------------------------------------------------------------------------------------------------------------------------------------------------------------------------------------------------------------------------------------------------------------------------------------------------------------------------------------------------------------------------------------------------------------|------------------------------------------------------------------------------------------------------------------------------------------------------------------------------------------------------------------------------------------------------------------------------------------------------------------------------------------------------------------------------------------------------------------------------------------------------------------------------------------------------------------------------------------------------------------------------------------------------------------------------------------------------------------------------------------------------------------------------------------------------------------------------------------------------------------------------------------------------------------------------------------------------------------------------------------------------------------------------------------------------------------------------------------------------------------------------------------------------------------------------------------------------------------------------------------------------------------------------------------------------------------------------------------------------------------------------------------------------------------------------------------------------------------------------------------------------------------------------------------------------------------------------------------------------------------------------------------------------------------------|--------------------------------------------------------------------------------------------------------------------------------------------------------------------------------------------------------------------------------------------------------------------------------------------------------------------------------------------------------------------------------------------------------------------------------------------------------------------------------------------------------------------------------------------------------------------------------------------------------------------------------------------------------------------------------------------------------------------------------------------------------------------------------------------------------------------------------------------------------------------------------------------------------------------------------------------------------------------------------------------------------------------------------------------------------------------------------------------------------------------------------------------------------------------------------------------------------------------------------------------------------------------------------------------------------------------------------------------------------------------------------------------|



|            |                                                                                                                                                                                                                                                                                                                                                                                                                                                                                                                                                                                                                                                                                                                                                                                                                                                                                                                                                                                                                                                                                                                                                                                                                                                                                                                                                                                                                                                                                                                                                                                                                                                                                                             |                                                                                                                                                                                                                                                                                                                                                                                                                                                                                                                                                                                                                                                                                                                                                                                                                                                                                                                                                                                                                                                                                                                                                                                                                                                                                                                                                                                                                                                                                                                                                                                                                                |                                                                                                                                                                                                                                                                                                                                                                                                                                                                                                                                                                                                                                                                                                                                                                                                                                                                                                                                                                                                                                                                                                                                                                                                                                                                                                                                                                                                                                                                                                                                                                                                                                                                                                                                                                                                                                                                                                                            |
|------------|-------------------------------------------------------------------------------------------------------------------------------------------------------------------------------------------------------------------------------------------------------------------------------------------------------------------------------------------------------------------------------------------------------------------------------------------------------------------------------------------------------------------------------------------------------------------------------------------------------------------------------------------------------------------------------------------------------------------------------------------------------------------------------------------------------------------------------------------------------------------------------------------------------------------------------------------------------------------------------------------------------------------------------------------------------------------------------------------------------------------------------------------------------------------------------------------------------------------------------------------------------------------------------------------------------------------------------------------------------------------------------------------------------------------------------------------------------------------------------------------------------------------------------------------------------------------------------------------------------------------------------------------------------------------------------------------------------------|--------------------------------------------------------------------------------------------------------------------------------------------------------------------------------------------------------------------------------------------------------------------------------------------------------------------------------------------------------------------------------------------------------------------------------------------------------------------------------------------------------------------------------------------------------------------------------------------------------------------------------------------------------------------------------------------------------------------------------------------------------------------------------------------------------------------------------------------------------------------------------------------------------------------------------------------------------------------------------------------------------------------------------------------------------------------------------------------------------------------------------------------------------------------------------------------------------------------------------------------------------------------------------------------------------------------------------------------------------------------------------------------------------------------------------------------------------------------------------------------------------------------------------------------------------------------------------------------------------------------------------|----------------------------------------------------------------------------------------------------------------------------------------------------------------------------------------------------------------------------------------------------------------------------------------------------------------------------------------------------------------------------------------------------------------------------------------------------------------------------------------------------------------------------------------------------------------------------------------------------------------------------------------------------------------------------------------------------------------------------------------------------------------------------------------------------------------------------------------------------------------------------------------------------------------------------------------------------------------------------------------------------------------------------------------------------------------------------------------------------------------------------------------------------------------------------------------------------------------------------------------------------------------------------------------------------------------------------------------------------------------------------------------------------------------------------------------------------------------------------------------------------------------------------------------------------------------------------------------------------------------------------------------------------------------------------------------------------------------------------------------------------------------------------------------------------------------------------------------------------------------------------------------------------------------------------|
| <p>Q36</p> | <p>The symptoms described — pruritis (itchiness) and grittiness in the eyes along with a dry mouth — may suggest an immune-related adverse event caused by the immunotherapy Dostarlimab, a PD-1 inhibitor. Specifically, these symptoms are consistent with a condition known as Sjögren's syndrome.</p> <p>Sjögren's syndrome is an autoimmune disorder that primarily affects the exocrine glands, like the lacrimal glands (which produce tears) and the salivary glands (which produce saliva), leading to their dysfunction. This can result in dry eyes, dry mouth, and other symptoms.</p> <p>Immunotherapies like Dostarlimab work by boosting the immune response, and while they can be effective against cancer, they can also sometimes lead to the immune system attacking normal tissues, resulting in conditions like Sjögren's syndrome.</p> <p>However, it's also important to consider other potential causes for these symptoms, such as medication side effects, infections, or other autoimmune conditions. Therefore, it's essential that these symptoms be evaluated by a healthcare provider, who can recommend the appropriate tests and treatments based on the specific circumstances. If Sjögren's syndrome is confirmed, treatments often involve managing the symptoms and may include artificial tears, moisturizing mouth products, or, in some cases, medications that stimulate tear and saliva production.</p> <p>The implications for the ongoing cancer treatment should also be considered, as in some cases, the immunotherapy may need to be adjusted or temporarily stopped. As always, these decisions should be guided by the treating healthcare provider.</p> | <p>The symptoms described — progressive pruritis (itchiness) and grittiness in the eyes along with dry mouth — are suggestive of an immune-related adverse event known as Sjögren's syndrome, which might be induced by the immunotherapy, Dostarlimab.</p> <p>Sjögren's syndrome is an autoimmune condition characterized by dry eyes and dry mouth, due to damage to the glands that produce tears and saliva. Although traditionally associated with the production of autoantibodies, it's now known that it can also be triggered by medications, including immunotherapies like Dostarlimab. Dostarlimab is a PD-1 inhibitor, which works by enhancing the immune system's ability to fight cancer cells, but in doing so, it may also cause the immune system to attack healthy tissues, leading to autoimmune conditions like Sjögren's syndrome.</p> <p>However, it's essential to note that while these symptoms are consistent with Sjögren's syndrome, they could also be due to other causes such as allergic reactions, infections, or other medication side effects. Therefore, it's crucial to have these symptoms evaluated by a healthcare professional who can guide further investigation and management.</p> <p>If Sjögren's syndrome is confirmed, the management will generally focus on alleviating the symptoms, which may include artificial tears for dry eyes, saliva substitutes for dry mouth, and possibly systemic treatments for more severe cases. It's also critical to assess the risk-benefit ratio of continuing Dostarlimab therapy, in consultation with the patient's oncologist.</p> | <p>The symptoms of pruritus (itchiness) and grittiness in the eyes along with a dry mouth suggest an autoimmune response affecting the glands that produce tears and saliva. This is consistent with a condition known as Sjögren's syndrome.</p> <p>Sjögren's syndrome is an autoimmune disease in which immune cells attack and destroy the glands that produce tears and saliva, leading to dryness in the mouth and eyes. While it commonly occurs on its own, it can also be triggered by medications, including immune checkpoint inhibitors such as Dostarlimab.</p> <p>Dostarlimab is a type of immunotherapy that works by blocking the programmed death-1 (PD-1) receptor, thereby enhancing the immune system's response against cancer cells. However, these immunomodulatory therapies can also inadvertently lead to an overactive immune response against normal body tissues, leading to autoimmune-related side effects.</p> <p>While this diagnosis fits with the symptoms, it's important to confirm it with appropriate investigations. Other conditions can also cause similar symptoms, and it's crucial to rule them out. The treating physician would likely arrange tests, which may include a Schirmer's test (to measure tear production), blood tests looking for specific antibodies, a lip biopsy, or an eye examination.</p> <p>Management generally involves symptomatic relief of dryness (with artificial tears and saliva substitutes) and addressing the underlying immune response. The latter might require temporary interruption or dose modification of the Dostarlimab, or initiation of corticosteroids or other immunosuppressive therapies.</p> <p>It's crucial to keep the treating oncologist informed about these symptoms, as adjustments to the cancer treatment may be necessary. Always consult with healthcare professionals for the management of such symptoms.</p> |
|------------|-------------------------------------------------------------------------------------------------------------------------------------------------------------------------------------------------------------------------------------------------------------------------------------------------------------------------------------------------------------------------------------------------------------------------------------------------------------------------------------------------------------------------------------------------------------------------------------------------------------------------------------------------------------------------------------------------------------------------------------------------------------------------------------------------------------------------------------------------------------------------------------------------------------------------------------------------------------------------------------------------------------------------------------------------------------------------------------------------------------------------------------------------------------------------------------------------------------------------------------------------------------------------------------------------------------------------------------------------------------------------------------------------------------------------------------------------------------------------------------------------------------------------------------------------------------------------------------------------------------------------------------------------------------------------------------------------------------|--------------------------------------------------------------------------------------------------------------------------------------------------------------------------------------------------------------------------------------------------------------------------------------------------------------------------------------------------------------------------------------------------------------------------------------------------------------------------------------------------------------------------------------------------------------------------------------------------------------------------------------------------------------------------------------------------------------------------------------------------------------------------------------------------------------------------------------------------------------------------------------------------------------------------------------------------------------------------------------------------------------------------------------------------------------------------------------------------------------------------------------------------------------------------------------------------------------------------------------------------------------------------------------------------------------------------------------------------------------------------------------------------------------------------------------------------------------------------------------------------------------------------------------------------------------------------------------------------------------------------------|----------------------------------------------------------------------------------------------------------------------------------------------------------------------------------------------------------------------------------------------------------------------------------------------------------------------------------------------------------------------------------------------------------------------------------------------------------------------------------------------------------------------------------------------------------------------------------------------------------------------------------------------------------------------------------------------------------------------------------------------------------------------------------------------------------------------------------------------------------------------------------------------------------------------------------------------------------------------------------------------------------------------------------------------------------------------------------------------------------------------------------------------------------------------------------------------------------------------------------------------------------------------------------------------------------------------------------------------------------------------------------------------------------------------------------------------------------------------------------------------------------------------------------------------------------------------------------------------------------------------------------------------------------------------------------------------------------------------------------------------------------------------------------------------------------------------------------------------------------------------------------------------------------------------------|

|            |                                                                                                                                                                                                                                                                                                                                                                                                                                                                                                                                                                                                                                                                                                                                                                                                                                                                                                                                                                                                                                                                                                                                                                                                                                                                                                                                                                                                                                                                                                                                                                                                                                                                                                                                                                                                      |                                                                                                                                                                                                                                                                                                                                                                                                                                                                                                                                                                                                                                                                                                                                                                                                                                                                                                                                                                                                                                                                                                                                                                                                                                                                                                                                                                                                                                                                                                                                                                                                                                                                                                                                                                                                                                                                                                                                                                                                                                                                                                |                                                                                                                                                                                                                                                                                                                                                                                                                                                                                                                                                                                                                                                                                                                                                                                                                                                                                                                                                                                                                                                                                                                                                                                                                                                                                                                                                                                                                                                                                                                                                                                                                                             |
|------------|------------------------------------------------------------------------------------------------------------------------------------------------------------------------------------------------------------------------------------------------------------------------------------------------------------------------------------------------------------------------------------------------------------------------------------------------------------------------------------------------------------------------------------------------------------------------------------------------------------------------------------------------------------------------------------------------------------------------------------------------------------------------------------------------------------------------------------------------------------------------------------------------------------------------------------------------------------------------------------------------------------------------------------------------------------------------------------------------------------------------------------------------------------------------------------------------------------------------------------------------------------------------------------------------------------------------------------------------------------------------------------------------------------------------------------------------------------------------------------------------------------------------------------------------------------------------------------------------------------------------------------------------------------------------------------------------------------------------------------------------------------------------------------------------------|------------------------------------------------------------------------------------------------------------------------------------------------------------------------------------------------------------------------------------------------------------------------------------------------------------------------------------------------------------------------------------------------------------------------------------------------------------------------------------------------------------------------------------------------------------------------------------------------------------------------------------------------------------------------------------------------------------------------------------------------------------------------------------------------------------------------------------------------------------------------------------------------------------------------------------------------------------------------------------------------------------------------------------------------------------------------------------------------------------------------------------------------------------------------------------------------------------------------------------------------------------------------------------------------------------------------------------------------------------------------------------------------------------------------------------------------------------------------------------------------------------------------------------------------------------------------------------------------------------------------------------------------------------------------------------------------------------------------------------------------------------------------------------------------------------------------------------------------------------------------------------------------------------------------------------------------------------------------------------------------------------------------------------------------------------------------------------------------|---------------------------------------------------------------------------------------------------------------------------------------------------------------------------------------------------------------------------------------------------------------------------------------------------------------------------------------------------------------------------------------------------------------------------------------------------------------------------------------------------------------------------------------------------------------------------------------------------------------------------------------------------------------------------------------------------------------------------------------------------------------------------------------------------------------------------------------------------------------------------------------------------------------------------------------------------------------------------------------------------------------------------------------------------------------------------------------------------------------------------------------------------------------------------------------------------------------------------------------------------------------------------------------------------------------------------------------------------------------------------------------------------------------------------------------------------------------------------------------------------------------------------------------------------------------------------------------------------------------------------------------------|
| <p>Q37</p> | <p>As an AI, I provide information based on existing medical knowledge and guidelines up to my last update in September 2021.</p> <p>The safety and efficacy of immunotherapy in patients with well-controlled inflammatory bowel disease (IBD), including Crohn's disease, is an area of ongoing research. Some studies suggest that patients with well-controlled IBD can safely receive immunotherapy, while others show a potential increased risk of flare-ups.</p> <p>The decision to use immunotherapy in a patient with a pre-existing autoimmune condition like Crohn's disease often involves weighing the potential benefits against the potential risks. The potential for the immunotherapy to cause a flare-up of the Crohn's disease, leading to symptoms such as diarrhea, abdominal pain, and weight loss, must be balanced against the potential benefits of the immunotherapy for treating the melanoma.</p> <p>Generally, the specific choice of treatment would depend on a variety of factors including:</p> <ol style="list-style-type: none"> <li>1. The severity of the melanoma.</li> <li>2. The overall health status of the patient.</li> <li>3. The degree of control of the Crohn's disease.</li> <li>4. The patient's personal preferences and values.</li> </ol> <p>As such, this decision is best made through a detailed discussion with your oncologist and gastroenterologist, who would have the most current information and understand your specific circumstances.</p> <p>It is important to know that different types of immunotherapies have different side effect profiles, and your doctors will choose the one which they feel is the most suitable for your case. Remember, your healthcare team is the best source of advice in these situations.</p> | <p>As of my last training cut-off in September 2021, the use of immune checkpoint inhibitors, a type of immunotherapy, in patients with underlying autoimmune disorders such as Crohn's disease, is a topic of ongoing research and discussion.</p> <p>Immunotherapy, such as PD-1 inhibitors (e.g., pembrolizumab, nivolumab) or CTLA-4 inhibitors (e.g., ipilimumab), have revolutionized the treatment of metastatic melanoma. However, these drugs work by enhancing the immune system's response, which can sometimes lead to an overactive immune system that attacks healthy tissues, including in individuals with pre-existing autoimmune diseases like Crohn's disease. This can potentially cause an exacerbation or "flare-up" of the autoimmune disease.</p> <p>However, this does not automatically preclude the use of these therapies. The decision to use immunotherapy is complex and involves a careful balance of risks and benefits. Factors to consider include the severity and control of your Crohn's disease, the stage and aggressiveness of your melanoma, the available treatment alternatives, your overall health, and your personal preferences.</p> <p>For patients with well-controlled Crohn's disease, immunotherapy may be an option, particularly if the potential benefit in controlling the melanoma is high. Some studies suggest that many patients with autoimmune diseases can receive these therapies without a significant flare of their underlying condition, but it is still a risk.</p> <p>As new data and research emerge beyond my last update, the understanding and guidelines may change. It's crucial that you have a thorough discussion with both your gastroenterologist and your oncologist to make the best individualized decision for your treatment. They can provide the most recent data and information and discuss the potential risks and benefits in the context of your personal medical history and circumstances.</p> <p>Remember to always consult with your healthcare team for advice and treatment decisions.</p> | <p>Immunotherapy has shown significant benefits for patients with metastatic melanoma; however, its use in patients with pre-existing autoimmune conditions, like Crohn's disease, needs to be carefully considered.</p> <p>As of my knowledge cut-off in September 2021, the use of immune checkpoint inhibitors, a type of immunotherapy, in patients with autoimmune diseases has been associated with an increased risk of exacerbations of the autoimmune condition. This means there is a risk that your Crohn's disease symptoms might worsen with the use of immunotherapy.</p> <p>However, each case is unique, and decisions regarding treatment should be individualized. A person with well-controlled Crohn's disease might still be considered for immunotherapy, particularly if the potential benefits of controlling the melanoma outweigh the risks of a Crohn's disease flare-up.</p> <p>Before making a decision, your healthcare team will consider several factors, including the severity and stability of your Crohn's disease, the extent of the melanoma, the potential benefits and risks of immunotherapy for you, and the availability of other treatment options. This decision should involve a thorough discussion with both your gastroenterologist, who is managing your Crohn's disease, and your oncologist, who is managing your melanoma.</p> <p>It's also important to remember that the field of oncology is rapidly evolving, and newer treatments or strategies may have emerged since my last update. Always consult with your healthcare team for the most current and personalized advice.</p> |
|------------|------------------------------------------------------------------------------------------------------------------------------------------------------------------------------------------------------------------------------------------------------------------------------------------------------------------------------------------------------------------------------------------------------------------------------------------------------------------------------------------------------------------------------------------------------------------------------------------------------------------------------------------------------------------------------------------------------------------------------------------------------------------------------------------------------------------------------------------------------------------------------------------------------------------------------------------------------------------------------------------------------------------------------------------------------------------------------------------------------------------------------------------------------------------------------------------------------------------------------------------------------------------------------------------------------------------------------------------------------------------------------------------------------------------------------------------------------------------------------------------------------------------------------------------------------------------------------------------------------------------------------------------------------------------------------------------------------------------------------------------------------------------------------------------------------|------------------------------------------------------------------------------------------------------------------------------------------------------------------------------------------------------------------------------------------------------------------------------------------------------------------------------------------------------------------------------------------------------------------------------------------------------------------------------------------------------------------------------------------------------------------------------------------------------------------------------------------------------------------------------------------------------------------------------------------------------------------------------------------------------------------------------------------------------------------------------------------------------------------------------------------------------------------------------------------------------------------------------------------------------------------------------------------------------------------------------------------------------------------------------------------------------------------------------------------------------------------------------------------------------------------------------------------------------------------------------------------------------------------------------------------------------------------------------------------------------------------------------------------------------------------------------------------------------------------------------------------------------------------------------------------------------------------------------------------------------------------------------------------------------------------------------------------------------------------------------------------------------------------------------------------------------------------------------------------------------------------------------------------------------------------------------------------------|---------------------------------------------------------------------------------------------------------------------------------------------------------------------------------------------------------------------------------------------------------------------------------------------------------------------------------------------------------------------------------------------------------------------------------------------------------------------------------------------------------------------------------------------------------------------------------------------------------------------------------------------------------------------------------------------------------------------------------------------------------------------------------------------------------------------------------------------------------------------------------------------------------------------------------------------------------------------------------------------------------------------------------------------------------------------------------------------------------------------------------------------------------------------------------------------------------------------------------------------------------------------------------------------------------------------------------------------------------------------------------------------------------------------------------------------------------------------------------------------------------------------------------------------------------------------------------------------------------------------------------------------|

|            |                                                                                                                                                                                                                                                                                                                                                                                                                                                                                                                                                                                                                                                                                                                                                                                                                                                                                                                                                                                                                                                                                                                                                                                                                                                                                                                                                                                                                                                                                                                                                                                                                                                                                                                                                                                                                                                                                                                                                                           |                                                                                                                                                                                                                                                                                                                                                                                                                                                                                                                                                                                                                                                                                                                                                                                                                                                                                                                                                                                                                                                                                                                                                                                                                                                                                                                                                                                                                                                                                                                                                                                                                                                                                                                                                                                                     |                                                                                                                                                                                                                                                                                                                                                                                                                                                                                                                                                                                                                                                                                                                                                                                                                                                                                                                                                                                                                                                                                                                                                                                                                                                                                                                                                                                                                                                                                                                                                                                                                                                                                                           |
|------------|---------------------------------------------------------------------------------------------------------------------------------------------------------------------------------------------------------------------------------------------------------------------------------------------------------------------------------------------------------------------------------------------------------------------------------------------------------------------------------------------------------------------------------------------------------------------------------------------------------------------------------------------------------------------------------------------------------------------------------------------------------------------------------------------------------------------------------------------------------------------------------------------------------------------------------------------------------------------------------------------------------------------------------------------------------------------------------------------------------------------------------------------------------------------------------------------------------------------------------------------------------------------------------------------------------------------------------------------------------------------------------------------------------------------------------------------------------------------------------------------------------------------------------------------------------------------------------------------------------------------------------------------------------------------------------------------------------------------------------------------------------------------------------------------------------------------------------------------------------------------------------------------------------------------------------------------------------------------------|-----------------------------------------------------------------------------------------------------------------------------------------------------------------------------------------------------------------------------------------------------------------------------------------------------------------------------------------------------------------------------------------------------------------------------------------------------------------------------------------------------------------------------------------------------------------------------------------------------------------------------------------------------------------------------------------------------------------------------------------------------------------------------------------------------------------------------------------------------------------------------------------------------------------------------------------------------------------------------------------------------------------------------------------------------------------------------------------------------------------------------------------------------------------------------------------------------------------------------------------------------------------------------------------------------------------------------------------------------------------------------------------------------------------------------------------------------------------------------------------------------------------------------------------------------------------------------------------------------------------------------------------------------------------------------------------------------------------------------------------------------------------------------------------------------|-----------------------------------------------------------------------------------------------------------------------------------------------------------------------------------------------------------------------------------------------------------------------------------------------------------------------------------------------------------------------------------------------------------------------------------------------------------------------------------------------------------------------------------------------------------------------------------------------------------------------------------------------------------------------------------------------------------------------------------------------------------------------------------------------------------------------------------------------------------------------------------------------------------------------------------------------------------------------------------------------------------------------------------------------------------------------------------------------------------------------------------------------------------------------------------------------------------------------------------------------------------------------------------------------------------------------------------------------------------------------------------------------------------------------------------------------------------------------------------------------------------------------------------------------------------------------------------------------------------------------------------------------------------------------------------------------------------|
| <p>Q38</p> | <p>The combination of symptoms including progressive fatigue, presyncope (a state of lightheadedness suggesting that fainting may occur), weight loss, orthostatic hypotension (a form of low blood pressure that happens when you stand up from sitting or lying down), hyponatremia (low sodium levels), and borderline hypoglycemia (low blood sugar levels) in a patient receiving Atezolizumab, an immunotherapy drug, is suggestive of adrenal insufficiency.</p> <p>Adrenal insufficiency is a condition in which the adrenal glands do not produce enough hormones. This can be due to a problem with the adrenal glands themselves (primary adrenal insufficiency, also known as Addison's disease), or a problem with the pituitary gland that normally signals the adrenal glands to produce hormones (secondary adrenal insufficiency).</p> <p>Atezolizumab is a type of immunotherapy called a PD-L1 inhibitor that works by enhancing the immune system's response against cancer cells. However, in doing so, it can sometimes cause the immune system to attack other parts of the body, including the adrenal glands, leading to conditions like adrenal insufficiency. This is considered an immune-related adverse event (irAE).</p> <p>It's important to seek immediate medical attention if adrenal insufficiency is suspected, as this condition can be life-threatening if not treated promptly. The definitive diagnosis is typically made based on laboratory tests including serum cortisol and ACTH levels, and imaging of the adrenal glands may also be performed. Treatment usually involves replacing the hormones that the adrenal glands are not making.</p> <p>In the context of immunotherapy, management of the underlying cancer treatment is also crucial and may involve adjusting the dose or schedule of the Atezolizumab, or potentially discontinuing it, in consultation with the oncologist managing the patient's care.</p> | <p>The symptoms described in this patient - progressive fatigue, presyncope (near-fainting), weight loss, orthostatic hypotension (drop in blood pressure upon standing), hyponatraemia (low sodium levels), and borderline hypoglycaemia (low blood sugar) - are consistent with adrenal insufficiency.</p> <p>Adrenal insufficiency is a condition in which the adrenal glands do not produce adequate amounts of steroid hormones. This condition can be caused by an immune-related adverse event (irAE) due to the use of immune checkpoint inhibitors like Atezolizumab.</p> <p>Atezolizumab is an immunotherapy drug that inhibits programmed death-ligand 1 (PD-L1), thereby enhancing the immune system's ability to fight cancer. However, by boosting the immune response, these medications can also cause the immune system to attack normal organs and tissues in the body, potentially leading to autoimmune conditions like adrenal insufficiency.</p> <p>It's important that the patient's symptoms are evaluated urgently, as untreated adrenal insufficiency can be life-threatening. Diagnosis typically involves blood tests to measure levels of adrenal hormones. The patient may also need an adrenocorticotropic hormone (ACTH) stimulation test to confirm the diagnosis.</p> <p>Treatment usually involves hormone replacement therapy to replace the insufficient hormones. The immunotherapy treatment plan may also need to be adjusted, which could involve dose reduction, temporary discontinuation, or switching to another treatment. However, the decision should be made in consultation with the healthcare provider, considering the severity of the adrenal insufficiency, the benefits of the cancer treatment, and the overall health of the patient.</p> | <p>The symptoms described - fatigue, presyncope (feeling faint), weight loss, orthostatic hypotension (a drop in blood pressure when standing), hyponatremia (low sodium levels), and borderline hypoglycemia (low blood sugar) - could indicate adrenal insufficiency.</p> <p>Atezolizumab, which is a type of immunotherapy known as a checkpoint inhibitor, can sometimes lead to immune-related adverse events. This happens when the drug, while targeting cancer cells, also causes the immune system to attack healthy cells. In this case, it's possible that the immune system has affected the adrenal glands, leading to adrenal insufficiency.</p> <p>Adrenal insufficiency is a condition where the adrenal glands do not produce enough hormones, leading to symptoms like fatigue, low blood pressure, weight loss, and electrolyte imbalances. If left untreated, adrenal insufficiency can be life-threatening, so immediate medical attention is required.</p> <p>Management of this condition typically involves hormone replacement therapy to replace the hormones that the adrenal glands are not producing. The approach to Atezolizumab may also need to be reassessed. This might involve adjusting the dose, delaying the next dose, or even stopping the drug entirely, depending on the severity of the patient's symptoms and the degree of adrenal insufficiency.</p> <p>This is a complex situation that requires a delicate balance between managing the patient's cancer and managing the side effects of treatment. Therefore, decisions should be made in close collaboration with the patient's healthcare team, including both oncologists and endocrinologists.</p> |
|------------|---------------------------------------------------------------------------------------------------------------------------------------------------------------------------------------------------------------------------------------------------------------------------------------------------------------------------------------------------------------------------------------------------------------------------------------------------------------------------------------------------------------------------------------------------------------------------------------------------------------------------------------------------------------------------------------------------------------------------------------------------------------------------------------------------------------------------------------------------------------------------------------------------------------------------------------------------------------------------------------------------------------------------------------------------------------------------------------------------------------------------------------------------------------------------------------------------------------------------------------------------------------------------------------------------------------------------------------------------------------------------------------------------------------------------------------------------------------------------------------------------------------------------------------------------------------------------------------------------------------------------------------------------------------------------------------------------------------------------------------------------------------------------------------------------------------------------------------------------------------------------------------------------------------------------------------------------------------------------|-----------------------------------------------------------------------------------------------------------------------------------------------------------------------------------------------------------------------------------------------------------------------------------------------------------------------------------------------------------------------------------------------------------------------------------------------------------------------------------------------------------------------------------------------------------------------------------------------------------------------------------------------------------------------------------------------------------------------------------------------------------------------------------------------------------------------------------------------------------------------------------------------------------------------------------------------------------------------------------------------------------------------------------------------------------------------------------------------------------------------------------------------------------------------------------------------------------------------------------------------------------------------------------------------------------------------------------------------------------------------------------------------------------------------------------------------------------------------------------------------------------------------------------------------------------------------------------------------------------------------------------------------------------------------------------------------------------------------------------------------------------------------------------------------------|-----------------------------------------------------------------------------------------------------------------------------------------------------------------------------------------------------------------------------------------------------------------------------------------------------------------------------------------------------------------------------------------------------------------------------------------------------------------------------------------------------------------------------------------------------------------------------------------------------------------------------------------------------------------------------------------------------------------------------------------------------------------------------------------------------------------------------------------------------------------------------------------------------------------------------------------------------------------------------------------------------------------------------------------------------------------------------------------------------------------------------------------------------------------------------------------------------------------------------------------------------------------------------------------------------------------------------------------------------------------------------------------------------------------------------------------------------------------------------------------------------------------------------------------------------------------------------------------------------------------------------------------------------------------------------------------------------------|

|                   |                                                                                                                                                                                                                                                                                                                                                                                                                                                                                                                                                                                                                                                                                                                                                                                                                                                                                                                                                                                                                                                                                                                       |                                                                                                                                                                                                                                                                                                                                                                                                                                                                                                                                                                                                                                                                                                                                                                                                                                                                                                                                                                                                                                                                                                                                                                                                                    |                                                                                                                                                                                                                                                                                                                                                                                                                                                                                                                                                                                                                                                                                                                                                                                                                                                                                                                                                                                                                                                                                                                                                                                                                                                                                                                                                                                                                                                                                                                                                                                                                                                                                                                                                                                         |
|-------------------|-----------------------------------------------------------------------------------------------------------------------------------------------------------------------------------------------------------------------------------------------------------------------------------------------------------------------------------------------------------------------------------------------------------------------------------------------------------------------------------------------------------------------------------------------------------------------------------------------------------------------------------------------------------------------------------------------------------------------------------------------------------------------------------------------------------------------------------------------------------------------------------------------------------------------------------------------------------------------------------------------------------------------------------------------------------------------------------------------------------------------|--------------------------------------------------------------------------------------------------------------------------------------------------------------------------------------------------------------------------------------------------------------------------------------------------------------------------------------------------------------------------------------------------------------------------------------------------------------------------------------------------------------------------------------------------------------------------------------------------------------------------------------------------------------------------------------------------------------------------------------------------------------------------------------------------------------------------------------------------------------------------------------------------------------------------------------------------------------------------------------------------------------------------------------------------------------------------------------------------------------------------------------------------------------------------------------------------------------------|-----------------------------------------------------------------------------------------------------------------------------------------------------------------------------------------------------------------------------------------------------------------------------------------------------------------------------------------------------------------------------------------------------------------------------------------------------------------------------------------------------------------------------------------------------------------------------------------------------------------------------------------------------------------------------------------------------------------------------------------------------------------------------------------------------------------------------------------------------------------------------------------------------------------------------------------------------------------------------------------------------------------------------------------------------------------------------------------------------------------------------------------------------------------------------------------------------------------------------------------------------------------------------------------------------------------------------------------------------------------------------------------------------------------------------------------------------------------------------------------------------------------------------------------------------------------------------------------------------------------------------------------------------------------------------------------------------------------------------------------------------------------------------------------|
| <p><b>Q39</b></p> | <p>The symptoms of rapid onset weight loss, severe thirst, frequent urination, and hunger, along with the finding of glucose in the urine (glycosuria), are indicative of new onset diabetes, specifically, diabetic ketoacidosis (DKA).</p> <p>Ipilimumab is a type of immunotherapy drug, specifically a CTLA-4 immune checkpoint inhibitor, that has been associated with immune-related adverse events (irAEs) including endocrinopathies such as type 1 diabetes.</p> <p>The presentation of diabetes in this context is often abrupt and may present as DKA, a serious complication of diabetes that occurs when the body produces high levels of blood acids called ketones due to a lack of insulin. DKA is a medical emergency that requires prompt hospitalization and treatment.</p> <p>Patients receiving ipilimumab should be monitored for hyperglycemia and other symptoms of diabetes. Any new onset of hyperglycemia or diagnosis of type 1 diabetes in this context would also necessitate a review of the use of ipilimumab in consultation with the patient's oncologist and endocrinologist.</p> | <p>The symptoms described - rapid weight loss, severe thirst, frequent urination, hunger, and the presence of glucose in the urine (glycosuria) - are classic signs of diabetes mellitus, most likely type 1 in this context.</p> <p>Ipilimumab, a type of immune checkpoint inhibitor, has been associated with the onset of autoimmune conditions, including type 1 diabetes. This occurs when the body's immune system, stimulated by the drug to fight cancer, mistakenly attacks the insulin-producing beta cells in the pancreas. This can result in an abrupt and severe onset of insulin deficiency, leading to hyperglycemia (high blood sugar) and potentially diabetic ketoacidosis, a serious, life-threatening condition.</p> <p>Patients receiving ipilimumab should be monitored for signs and symptoms of hyperglycemia and other endocrine dysfunctions. If diabetes is diagnosed, the patient would need to start on insulin therapy and potentially other supportive measures, depending on the severity of symptoms. The continuation of ipilimumab therapy should be evaluated in consultation with the healthcare team, taking into account the benefits and risks of ongoing treatment.</p> | <p>The symptoms described by the patient - rapid onset of weight loss, severe thirst, frequent urination, and hunger, along with the presence of glucose in the urine (glycosuria) - are classic signs of diabetes mellitus, likely type 1 diabetes.</p> <p>Type 1 diabetes is characterized by the destruction of insulin-producing beta cells in the pancreas, leading to insulin deficiency. The destruction of these cells is often mediated by an autoimmune process.</p> <p>Ipilimumab, a type of immunotherapy, acts as a CTLA-4 inhibitor to boost the immune system's response against cancer cells. However, by enhancing the immune response, it can cause the immune system to attack healthy cells, including the beta cells of the pancreas. This immune-related adverse effect can lead to the sudden onset of autoimmune type 1 diabetes, which can be severe and is often first recognized by the symptoms you mentioned or through laboratory findings.</p> <p>While these symptoms and the patient's medical treatment suggest type 1 diabetes as a likely diagnosis, the patient should undergo a thorough evaluation, including blood tests to confirm the diagnosis. The patient's blood glucose and HbA1c (a measure of average blood glucose over about three months) will likely be tested, and additional tests may be performed to evaluate the patient's insulin production and to look for markers of an autoimmune response.</p> <p>This situation would also require a careful reassessment of the patient's cancer treatment. If type 1 diabetes is confirmed, the patient would need to start insulin therapy, and the continuation of ipilimumab would depend on a careful assessment of the risks and benefits by the patient's healthcare team.</p> |
|-------------------|-----------------------------------------------------------------------------------------------------------------------------------------------------------------------------------------------------------------------------------------------------------------------------------------------------------------------------------------------------------------------------------------------------------------------------------------------------------------------------------------------------------------------------------------------------------------------------------------------------------------------------------------------------------------------------------------------------------------------------------------------------------------------------------------------------------------------------------------------------------------------------------------------------------------------------------------------------------------------------------------------------------------------------------------------------------------------------------------------------------------------|--------------------------------------------------------------------------------------------------------------------------------------------------------------------------------------------------------------------------------------------------------------------------------------------------------------------------------------------------------------------------------------------------------------------------------------------------------------------------------------------------------------------------------------------------------------------------------------------------------------------------------------------------------------------------------------------------------------------------------------------------------------------------------------------------------------------------------------------------------------------------------------------------------------------------------------------------------------------------------------------------------------------------------------------------------------------------------------------------------------------------------------------------------------------------------------------------------------------|-----------------------------------------------------------------------------------------------------------------------------------------------------------------------------------------------------------------------------------------------------------------------------------------------------------------------------------------------------------------------------------------------------------------------------------------------------------------------------------------------------------------------------------------------------------------------------------------------------------------------------------------------------------------------------------------------------------------------------------------------------------------------------------------------------------------------------------------------------------------------------------------------------------------------------------------------------------------------------------------------------------------------------------------------------------------------------------------------------------------------------------------------------------------------------------------------------------------------------------------------------------------------------------------------------------------------------------------------------------------------------------------------------------------------------------------------------------------------------------------------------------------------------------------------------------------------------------------------------------------------------------------------------------------------------------------------------------------------------------------------------------------------------------------|

|                   |                                                                                                                                                                                                                                                                                                                                                                                                                                                                                                                                                                                                                                                                                                                                                                                                                                                                                                                                                                                                                                                              |                                                                                                                                                                                                                                                                                                                                                                                                                                                                                                                                                                                                                                                                                                                                                                                                                                                                                                                                                                                                                                                                                              |                                                                                                                                                                                                                                                                                                                                                                                                                                                                                                                                                                                                                                                                                                                                                                                                                                                                                                                                                                                                                                                                                                                                                                                                                                                                                                                                                                                                                          |
|-------------------|--------------------------------------------------------------------------------------------------------------------------------------------------------------------------------------------------------------------------------------------------------------------------------------------------------------------------------------------------------------------------------------------------------------------------------------------------------------------------------------------------------------------------------------------------------------------------------------------------------------------------------------------------------------------------------------------------------------------------------------------------------------------------------------------------------------------------------------------------------------------------------------------------------------------------------------------------------------------------------------------------------------------------------------------------------------|----------------------------------------------------------------------------------------------------------------------------------------------------------------------------------------------------------------------------------------------------------------------------------------------------------------------------------------------------------------------------------------------------------------------------------------------------------------------------------------------------------------------------------------------------------------------------------------------------------------------------------------------------------------------------------------------------------------------------------------------------------------------------------------------------------------------------------------------------------------------------------------------------------------------------------------------------------------------------------------------------------------------------------------------------------------------------------------------|--------------------------------------------------------------------------------------------------------------------------------------------------------------------------------------------------------------------------------------------------------------------------------------------------------------------------------------------------------------------------------------------------------------------------------------------------------------------------------------------------------------------------------------------------------------------------------------------------------------------------------------------------------------------------------------------------------------------------------------------------------------------------------------------------------------------------------------------------------------------------------------------------------------------------------------------------------------------------------------------------------------------------------------------------------------------------------------------------------------------------------------------------------------------------------------------------------------------------------------------------------------------------------------------------------------------------------------------------------------------------------------------------------------------------|
| <p><b>Q40</b></p> | <p>For patients receiving immunotherapy such as Nivolumab who develop severe immune-mediated colitis that doesn't respond to initial corticosteroid therapy, the next line of treatment typically involves the use of infliximab, a tumor necrosis factor (TNF) alpha inhibitor. Infliximab works by reducing inflammation and can be very effective in controlling immune-mediated colitis.</p> <p>However, it's important to note that infliximab and other TNF-alpha inhibitors can increase the risk of infections, including reactivation of tuberculosis and other serious infections, so patients should be screened for these conditions before starting therapy.</p> <p>In addition, the patient's oncologist would likely recommend discontinuing Nivolumab due to the severity of the colitis, at least until the colitis is under better control.</p> <p>This is a complex situation that should be managed by a multidisciplinary team, including gastroenterologists and oncologists, to ensure the best possible outcome for the patient.</p> | <p>In patients with immune checkpoint inhibitor (ICI)-induced colitis that is not responding to high-dose corticosteroids, the next step is typically to introduce infliximab, a tumor necrosis factor alpha (TNF<math>\alpha</math>) inhibitor.</p> <p>Infliximab is a monoclonal antibody that is effective in treating a range of autoimmune conditions, including severe cases of ICI-induced colitis that are refractory to steroids. It works by binding to TNF<math>\alpha</math>, a pro-inflammatory cytokine, thereby reducing inflammation in the body.</p> <p>Before starting infliximab, it's important to rule out infections that could be exacerbated by this treatment, such as tuberculosis or hepatitis.</p> <p>Meanwhile, the patient's oncologist would likely recommend holding or discontinuing Nivolumab due to the severity of the colitis, at least until the colitis is under control.</p> <p>These decisions should be made in close collaboration with the patient's healthcare team, which should ideally include both oncologists and gastroenterologists.</p> | <p>In patients who have severe (grade 3 or 4) immune-related colitis that does not respond to initial corticosteroid therapy such as methylprednisolone, guidelines suggest the use of infliximab, a tumor necrosis factor (TNF) alpha inhibitor, as a next step.</p> <p>Infliximab works by blocking the inflammatory activity of TNF-alpha, a chemical messenger in the immune system that plays a key role in promoting inflammation. It is generally used for moderate to severe cases of inflammatory bowel diseases, and has shown efficacy in steroid-refractory immune-related colitis.</p> <p>However, it's important to note that patients should be screened for infections like tuberculosis before starting infliximab, because it can increase the risk of serious infections.</p> <p>In addition to introducing infliximab, it might also be necessary to withhold or permanently discontinue nivolumab in response to severe immune-mediated adverse reactions, depending on the clinical situation. The decision to continue or discontinue immunotherapy must be personalized, weighing the potential benefits against the risk for serious complications.</p> <p>The management of immune-related adverse events is complex and should be performed by a multidisciplinary team, including oncologists, gastroenterologists, and potentially others depending on the patient's clinical scenario.</p> |
|-------------------|--------------------------------------------------------------------------------------------------------------------------------------------------------------------------------------------------------------------------------------------------------------------------------------------------------------------------------------------------------------------------------------------------------------------------------------------------------------------------------------------------------------------------------------------------------------------------------------------------------------------------------------------------------------------------------------------------------------------------------------------------------------------------------------------------------------------------------------------------------------------------------------------------------------------------------------------------------------------------------------------------------------------------------------------------------------|----------------------------------------------------------------------------------------------------------------------------------------------------------------------------------------------------------------------------------------------------------------------------------------------------------------------------------------------------------------------------------------------------------------------------------------------------------------------------------------------------------------------------------------------------------------------------------------------------------------------------------------------------------------------------------------------------------------------------------------------------------------------------------------------------------------------------------------------------------------------------------------------------------------------------------------------------------------------------------------------------------------------------------------------------------------------------------------------|--------------------------------------------------------------------------------------------------------------------------------------------------------------------------------------------------------------------------------------------------------------------------------------------------------------------------------------------------------------------------------------------------------------------------------------------------------------------------------------------------------------------------------------------------------------------------------------------------------------------------------------------------------------------------------------------------------------------------------------------------------------------------------------------------------------------------------------------------------------------------------------------------------------------------------------------------------------------------------------------------------------------------------------------------------------------------------------------------------------------------------------------------------------------------------------------------------------------------------------------------------------------------------------------------------------------------------------------------------------------------------------------------------------------------|

|                   |                                                                                                                                                                                                                                                                                                                                                                                                                                                                                                                                                                                                                                                                                                                                                                                                                                                                                                                                                                                                                                                                                                                                                                                                                                                                                                                                                                                                                                                                                                                                                                                                                              |                                                                                                                                                                                                                                                                                                                                                                                                                                                                                                                                                                                                                                                                                                                                                                                                                                                                                                                                                                                                                                                                                                                                                                                                                                                                                                                                                                                                                                                                                                                                                                                                                                                                                                                                                                                                                                                                                                                                                                                                                                                                        |                                                                                                                                                                                                                                                                                                                                                                                                                                                                                                                                                                                                                                                                                                                                                                                                                                                                                                                                                                                                                                                                                                                                                                                                                                                                                                                                                                                                                                                                                                                                                                                                                                                                                                                                                                                                                                                                                                                                                                               |
|-------------------|------------------------------------------------------------------------------------------------------------------------------------------------------------------------------------------------------------------------------------------------------------------------------------------------------------------------------------------------------------------------------------------------------------------------------------------------------------------------------------------------------------------------------------------------------------------------------------------------------------------------------------------------------------------------------------------------------------------------------------------------------------------------------------------------------------------------------------------------------------------------------------------------------------------------------------------------------------------------------------------------------------------------------------------------------------------------------------------------------------------------------------------------------------------------------------------------------------------------------------------------------------------------------------------------------------------------------------------------------------------------------------------------------------------------------------------------------------------------------------------------------------------------------------------------------------------------------------------------------------------------------|------------------------------------------------------------------------------------------------------------------------------------------------------------------------------------------------------------------------------------------------------------------------------------------------------------------------------------------------------------------------------------------------------------------------------------------------------------------------------------------------------------------------------------------------------------------------------------------------------------------------------------------------------------------------------------------------------------------------------------------------------------------------------------------------------------------------------------------------------------------------------------------------------------------------------------------------------------------------------------------------------------------------------------------------------------------------------------------------------------------------------------------------------------------------------------------------------------------------------------------------------------------------------------------------------------------------------------------------------------------------------------------------------------------------------------------------------------------------------------------------------------------------------------------------------------------------------------------------------------------------------------------------------------------------------------------------------------------------------------------------------------------------------------------------------------------------------------------------------------------------------------------------------------------------------------------------------------------------------------------------------------------------------------------------------------------------|-------------------------------------------------------------------------------------------------------------------------------------------------------------------------------------------------------------------------------------------------------------------------------------------------------------------------------------------------------------------------------------------------------------------------------------------------------------------------------------------------------------------------------------------------------------------------------------------------------------------------------------------------------------------------------------------------------------------------------------------------------------------------------------------------------------------------------------------------------------------------------------------------------------------------------------------------------------------------------------------------------------------------------------------------------------------------------------------------------------------------------------------------------------------------------------------------------------------------------------------------------------------------------------------------------------------------------------------------------------------------------------------------------------------------------------------------------------------------------------------------------------------------------------------------------------------------------------------------------------------------------------------------------------------------------------------------------------------------------------------------------------------------------------------------------------------------------------------------------------------------------------------------------------------------------------------------------------------------------|
| <p><b>Q41</b></p> | <p>The patient's persistent diarrhea may be a side effect of the Nivolumab, Cabozantinib, or both. Diarrhea is a common adverse event associated with many cancer therapies including immunotherapies like Nivolumab and tyrosine kinase inhibitors like Cabozantinib.</p> <p>For mild diarrhea (fewer than 4–6 stools per day over baseline), the first step in management usually involves non-pharmacologic interventions such as dietary modifications (e.g., a low-fiber, bland 'BRAT' diet of bananas, rice, applesauce, toast), hydration to replace lost fluids, and potentially probiotics.</p> <p>If these measures do not control the diarrhea, or if the patient's condition worsens, the next step would typically involve the use of anti-diarrheal medications, such as loperamide.</p> <p>It's also important to rule out infectious causes of diarrhea, as patients receiving these therapies can be at increased risk for infections. This could involve stool tests to look for bacteria, viruses, or other pathogens.</p> <p>Finally, the patient's oncologist may consider adjusting the dose of the Nivolumab or Cabozantinib, or possibly even temporarily discontinuing one or both of these drugs, depending on the severity of the diarrhea and the patient's overall clinical situation. The healthcare team should also be vigilant for signs of more serious gastrointestinal complications, such as colitis.</p> <p>In all cases, the management of these symptoms should be tailored to the individual patient's needs and circumstances, in close consultation with the healthcare team.</p> | <p>The patient's symptoms of persistent diarrhoea, with around 4 watery bowel movements a day, are indicative of a mild to moderate immune-related adverse event (irAE) possibly due to Nivolumab, Cabozantinib, or both, as both these drugs can cause diarrhoea. Here's a general approach to managing this adverse event:</p> <ol style="list-style-type: none"> <li><b>Supportive Care and Monitoring</b>: Supportive care is the initial step in managing diarrhoea and includes ensuring adequate hydration and electrolyte repletion. The patient should be advised to increase fluid intake to compensate for the loss.</li> <li><b>Dietary Modifications</b>: The patient could be advised to follow a low-fibre diet. This often includes foods such as rice, bananas, and applesauce.</li> <li><b>Pharmacologic Treatment</b>: If dietary changes and maintaining hydration do not alleviate the diarrhoea, over-the-counter anti-diarrheal medication such as loperamide could be used.</li> <li><b>Infection Screening</b>: Although the diarrhoea is likely due to the immunotherapy or targeted therapy, it's essential to rule out an infectious cause. The doctor may request a stool sample to check for infections, such as <i>C. difficile</i>.</li> <li><b>Reassessment of Cancer Treatment Regimen</b>: If the diarrhoea persists despite these measures, the oncologist may need to consider modifying the cancer treatment. This could involve dose reduction, temporary interruption, or even permanent discontinuation of one or both drugs, depending on the severity of the symptoms and the patient's overall condition.</li> </ol> <p>All changes should be made in consultation with the patient's healthcare provider. If the diarrhoea becomes severe (more than 6 bowel movements per day over baseline) or if it's associated with severe abdominal pain, blood in the stool, or fever, the patient should seek immediate medical attention. This could be a sign of severe colitis, which can be a life-threatening emergency.</p> | <p>This patient's diarrhea is a common side effect of both Nivolumab, a type of immunotherapy, and Cabozantinib, a tyrosine kinase inhibitor. Both drugs can disrupt normal functioning of the gastrointestinal tract.</p> <p>In the case of persistent diarrhoea with approximately 4 bowel motions per day, this would typically be considered grade 2 diarrhoea according to the Common Terminology Criteria for Adverse Events (CTCAE). The general approach to manage such symptoms involves:</p> <ol style="list-style-type: none"> <li><b>Dietary Modifications</b>: Consider dietary changes such as eating smaller, more frequent meals; avoiding foods that can exacerbate diarrhoea (e.g., high fiber, dairy, spicy or greasy foods); and staying hydrated.</li> <li><b>Antidiarrheal Medications</b>: Over-the-counter anti-diarrheal agents like loperamide (Imodium) can be used as a first-line therapy.</li> <li><b>Investigating Other Causes</b>: While the diarrhoea is likely treatment-related, it's important to exclude other potential causes, such as an infection. The healthcare team may decide to perform a stool culture or other tests to rule out infectious causes.</li> <li><b>Assessing Treatment Regimen</b>: If these interventions do not adequately control the symptoms, or if the diarrhoea worsens, the oncology team may need to consider altering the cancer treatment plan. This could involve dose reduction, temporary discontinuation, or even switching to an alternative therapy.</li> </ol> <p>Always, any changes to treatment should be made in consultation with the healthcare team. If diarrhoea becomes severe (more than 6 bowel movements per day over baseline), or is accompanied by severe symptoms such as abdominal pain, fever, or blood in the stool, it should be treated as an emergency. The healthcare provider must be notified immediately, as it could signify a serious condition like colitis.</p> |
|-------------------|------------------------------------------------------------------------------------------------------------------------------------------------------------------------------------------------------------------------------------------------------------------------------------------------------------------------------------------------------------------------------------------------------------------------------------------------------------------------------------------------------------------------------------------------------------------------------------------------------------------------------------------------------------------------------------------------------------------------------------------------------------------------------------------------------------------------------------------------------------------------------------------------------------------------------------------------------------------------------------------------------------------------------------------------------------------------------------------------------------------------------------------------------------------------------------------------------------------------------------------------------------------------------------------------------------------------------------------------------------------------------------------------------------------------------------------------------------------------------------------------------------------------------------------------------------------------------------------------------------------------------|------------------------------------------------------------------------------------------------------------------------------------------------------------------------------------------------------------------------------------------------------------------------------------------------------------------------------------------------------------------------------------------------------------------------------------------------------------------------------------------------------------------------------------------------------------------------------------------------------------------------------------------------------------------------------------------------------------------------------------------------------------------------------------------------------------------------------------------------------------------------------------------------------------------------------------------------------------------------------------------------------------------------------------------------------------------------------------------------------------------------------------------------------------------------------------------------------------------------------------------------------------------------------------------------------------------------------------------------------------------------------------------------------------------------------------------------------------------------------------------------------------------------------------------------------------------------------------------------------------------------------------------------------------------------------------------------------------------------------------------------------------------------------------------------------------------------------------------------------------------------------------------------------------------------------------------------------------------------------------------------------------------------------------------------------------------------|-------------------------------------------------------------------------------------------------------------------------------------------------------------------------------------------------------------------------------------------------------------------------------------------------------------------------------------------------------------------------------------------------------------------------------------------------------------------------------------------------------------------------------------------------------------------------------------------------------------------------------------------------------------------------------------------------------------------------------------------------------------------------------------------------------------------------------------------------------------------------------------------------------------------------------------------------------------------------------------------------------------------------------------------------------------------------------------------------------------------------------------------------------------------------------------------------------------------------------------------------------------------------------------------------------------------------------------------------------------------------------------------------------------------------------------------------------------------------------------------------------------------------------------------------------------------------------------------------------------------------------------------------------------------------------------------------------------------------------------------------------------------------------------------------------------------------------------------------------------------------------------------------------------------------------------------------------------------------------|

|            |                                                                                                                                                                                                                                                                                                                                                                                                                                                                                                                                                                                                                                                                                                                                                                                                                                                                                                                                                                                                                                                                                                                                                                                                                                                                                                                                                                                                                                    |                                                                                                                                                                                                                                                                                                                                                                                                                                                                                                                                                                                                                                                                                                                                                                                                                                                                                                                                                                                                                                                                                                                                                                                                                                                                                                                                                      |                                                                                                                                                                                                                                                                                                                                                                                                                                                                                                                                                                                                                                                                                                                                                                                                                                                                                                                                                                                                                                                                                                                                                                                                                                                                                                                                                                                                                                                                                                                                                |
|------------|------------------------------------------------------------------------------------------------------------------------------------------------------------------------------------------------------------------------------------------------------------------------------------------------------------------------------------------------------------------------------------------------------------------------------------------------------------------------------------------------------------------------------------------------------------------------------------------------------------------------------------------------------------------------------------------------------------------------------------------------------------------------------------------------------------------------------------------------------------------------------------------------------------------------------------------------------------------------------------------------------------------------------------------------------------------------------------------------------------------------------------------------------------------------------------------------------------------------------------------------------------------------------------------------------------------------------------------------------------------------------------------------------------------------------------|------------------------------------------------------------------------------------------------------------------------------------------------------------------------------------------------------------------------------------------------------------------------------------------------------------------------------------------------------------------------------------------------------------------------------------------------------------------------------------------------------------------------------------------------------------------------------------------------------------------------------------------------------------------------------------------------------------------------------------------------------------------------------------------------------------------------------------------------------------------------------------------------------------------------------------------------------------------------------------------------------------------------------------------------------------------------------------------------------------------------------------------------------------------------------------------------------------------------------------------------------------------------------------------------------------------------------------------------------|------------------------------------------------------------------------------------------------------------------------------------------------------------------------------------------------------------------------------------------------------------------------------------------------------------------------------------------------------------------------------------------------------------------------------------------------------------------------------------------------------------------------------------------------------------------------------------------------------------------------------------------------------------------------------------------------------------------------------------------------------------------------------------------------------------------------------------------------------------------------------------------------------------------------------------------------------------------------------------------------------------------------------------------------------------------------------------------------------------------------------------------------------------------------------------------------------------------------------------------------------------------------------------------------------------------------------------------------------------------------------------------------------------------------------------------------------------------------------------------------------------------------------------------------|
| <p>Q42</p> | <p>The patient's symptoms suggest a phenomenon known as "radiation recall," a rare but recognized side effect of certain systemic therapies, including immunotherapies like pembrolizumab. Radiation recall refers to an acute inflammatory reaction within previously irradiated areas of the body, which is triggered by the administration of certain drugs.</p> <p>In this case, the patient's pain, erythema, and mucositis in the area previously treated with radiation for tonsillar cancer may be due to pembrolizumab inducing a radiation recall reaction. The exact mechanism underlying radiation recall is not well understood, but it is believed to involve an inflammatory response in tissues that were previously damaged by radiation.</p> <p>Treatment of radiation recall reactions generally involves symptomatic management, which might include pain medication, topical treatments, and treatments for oral mucositis such as mouthwashes or gels. Severe cases might require the systemic therapy (in this case, pembrolizumab) to be withheld or dose-reduced.</p> <p>However, it is also important to consider and rule out other potential causes of the patient's symptoms, such as infection, tumor progression, or other drug-induced toxicities. Therefore, the patient should be evaluated by their healthcare team to determine the exact cause of the symptoms and appropriate treatment.</p> | <p>The patient's symptoms suggest a phenomenon known as "radiation recall." This is a reaction that can occur in an area that has previously received radiation, triggered by the administration of certain drugs. In this case, the drug would be pembrolizumab, an immunotherapy medication.</p> <p>Radiation recall is not fully understood, but it seems to be an inflammatory response in the previously irradiated tissue. The symptoms you described -- pain, erythema (redness of the skin or mucous membranes), and mucositis (inflammation and ulceration of the mucous membranes) -- are consistent with this condition. Difficulty swallowing (or dysphagia) could be a result of mucositis occurring in the throat or esophagus, which would be expected in a patient who received radiation for tonsillar cancer.</p> <p>Management of radiation recall reactions often involves managing the symptoms and can sometimes require holding or adjusting the dose of the drug that triggered the reaction. In this case, that would be pembrolizumab.</p> <p>However, other potential causes of these symptoms should also be considered, such as infection or tumor progression. Therefore, it's crucial for this patient to be evaluated by their healthcare team to confirm the diagnosis and determine the best course of action.</p> | <p>The symptoms presented are suggestive of a condition known as radiation recall dermatitis. Radiation recall is an inflammatory skin reaction that occurs in a previously irradiated area, triggered by the administration of certain drugs. In this case, pembrolizumab, an immunotherapy drug, is the likely trigger.</p> <p>This is a relatively rare reaction and the exact mechanism of how and why it occurs is not entirely understood. It is hypothesized that the drug may incite an inflammatory reaction in the previously radiated tissues.</p> <p>Radiation recall dermatitis typically presents as a painful, erythematous rash in the area that previously received radiation. Other symptoms can include swelling, tenderness, or blistering. More severe cases can develop into mucositis, as is being seen in this patient, which can make swallowing difficult and cause significant discomfort.</p> <p>It's important for the healthcare team to evaluate the symptoms, as they can also resemble other conditions such as infection or tumor progression. Depending on the severity of the symptoms and the overall health of the patient, treatment of radiation recall dermatitis can involve topical or systemic corticosteroids, symptom management with analgesics, and temporary suspension or dose reduction of the causative drug. In some severe cases, discontinuation of the triggering drug might be necessary. Please consult with the healthcare provider for specific patient management strategies.</p> |
|------------|------------------------------------------------------------------------------------------------------------------------------------------------------------------------------------------------------------------------------------------------------------------------------------------------------------------------------------------------------------------------------------------------------------------------------------------------------------------------------------------------------------------------------------------------------------------------------------------------------------------------------------------------------------------------------------------------------------------------------------------------------------------------------------------------------------------------------------------------------------------------------------------------------------------------------------------------------------------------------------------------------------------------------------------------------------------------------------------------------------------------------------------------------------------------------------------------------------------------------------------------------------------------------------------------------------------------------------------------------------------------------------------------------------------------------------|------------------------------------------------------------------------------------------------------------------------------------------------------------------------------------------------------------------------------------------------------------------------------------------------------------------------------------------------------------------------------------------------------------------------------------------------------------------------------------------------------------------------------------------------------------------------------------------------------------------------------------------------------------------------------------------------------------------------------------------------------------------------------------------------------------------------------------------------------------------------------------------------------------------------------------------------------------------------------------------------------------------------------------------------------------------------------------------------------------------------------------------------------------------------------------------------------------------------------------------------------------------------------------------------------------------------------------------------------|------------------------------------------------------------------------------------------------------------------------------------------------------------------------------------------------------------------------------------------------------------------------------------------------------------------------------------------------------------------------------------------------------------------------------------------------------------------------------------------------------------------------------------------------------------------------------------------------------------------------------------------------------------------------------------------------------------------------------------------------------------------------------------------------------------------------------------------------------------------------------------------------------------------------------------------------------------------------------------------------------------------------------------------------------------------------------------------------------------------------------------------------------------------------------------------------------------------------------------------------------------------------------------------------------------------------------------------------------------------------------------------------------------------------------------------------------------------------------------------------------------------------------------------------|

|                   |                                                                                                                                                                                                                                                                                                                                                                                                                                                                                                                                                                                                                                                                                                                                                                                                                                                                                                                                                                                                                                                                                                                                                                                                                                                                                                                                                                                                                                                                                                                                                                               |                                                                                                                                                                                                                                                                                                                                                                                                                                                                                                                                                                                                                                                                                                                                                                                                                                                                                                                                                                                                                                                                                                                                                                                                                                                                                                                                                                                                                                                                                                              |                                                                                                                                                                                                                                                                                                                                                                                                                                                                                                                                                                                                                                                                                                                                                                                                                                                                                                                                                                                                                                                                                                                                                                                                                                                                                                                                                                                                                                                                                                                                                                                      |
|-------------------|-------------------------------------------------------------------------------------------------------------------------------------------------------------------------------------------------------------------------------------------------------------------------------------------------------------------------------------------------------------------------------------------------------------------------------------------------------------------------------------------------------------------------------------------------------------------------------------------------------------------------------------------------------------------------------------------------------------------------------------------------------------------------------------------------------------------------------------------------------------------------------------------------------------------------------------------------------------------------------------------------------------------------------------------------------------------------------------------------------------------------------------------------------------------------------------------------------------------------------------------------------------------------------------------------------------------------------------------------------------------------------------------------------------------------------------------------------------------------------------------------------------------------------------------------------------------------------|--------------------------------------------------------------------------------------------------------------------------------------------------------------------------------------------------------------------------------------------------------------------------------------------------------------------------------------------------------------------------------------------------------------------------------------------------------------------------------------------------------------------------------------------------------------------------------------------------------------------------------------------------------------------------------------------------------------------------------------------------------------------------------------------------------------------------------------------------------------------------------------------------------------------------------------------------------------------------------------------------------------------------------------------------------------------------------------------------------------------------------------------------------------------------------------------------------------------------------------------------------------------------------------------------------------------------------------------------------------------------------------------------------------------------------------------------------------------------------------------------------------|--------------------------------------------------------------------------------------------------------------------------------------------------------------------------------------------------------------------------------------------------------------------------------------------------------------------------------------------------------------------------------------------------------------------------------------------------------------------------------------------------------------------------------------------------------------------------------------------------------------------------------------------------------------------------------------------------------------------------------------------------------------------------------------------------------------------------------------------------------------------------------------------------------------------------------------------------------------------------------------------------------------------------------------------------------------------------------------------------------------------------------------------------------------------------------------------------------------------------------------------------------------------------------------------------------------------------------------------------------------------------------------------------------------------------------------------------------------------------------------------------------------------------------------------------------------------------------------|
| <p><b>Q43</b></p> | <p>The symptoms described, along with the laboratory and spirometry findings, suggest that the patient might be experiencing an immune-related adverse event known as immune-mediated myositis, which can be a side effect of immunotherapy drugs such as Pembrolizumab. This condition can manifest with muscle weakness, muscle pain (myalgias), fatigue, and elevation of muscle enzymes such as creatine kinase. The presence of elevated troponin might indicate involvement of the heart muscle (myocarditis), which can occur in conjunction with myositis.</p> <p>Another clue that suggests myositis is the restrictive pattern on spirometry. This could potentially be due to weakness of the muscles used in breathing if the myositis is affecting these muscles, leading to a restrictive lung pattern.</p> <p>This is a serious condition that may require the discontinuation of the immunotherapy and aggressive treatment, potentially with corticosteroids and other immunosuppressive therapies. Early recognition and treatment of immune-mediated myositis is important because the condition can be life-threatening, particularly if there is cardiac involvement. The patient should be urgently evaluated by their healthcare team and may need to be referred to a specialist in rheumatology or neurology for further management.</p> <p>However, given that these symptoms and signs are not specific, other conditions may also need to be considered, including other immunotherapy-related toxicities, infection, and cancer progression.</p> | <p>The symptoms and lab results suggest that the patient may be experiencing immune-mediated myositis, which is a rare but serious side effect of pembrolizumab and other immune checkpoint inhibitors. This condition involves inflammation and damage to the muscles, which can lead to symptoms such as muscle weakness, fatigue, and myalgia. The elevated levels of creatine kinase in the blood are consistent with muscle damage. The restrictive pattern on spirometry could potentially indicate diaphragmatic or other respiratory muscle weakness, which can occur in severe cases of myositis.</p> <p>In addition, the patient's elevated troponin levels suggest potential cardiac involvement, which could indicate a condition known as myocarditis, or inflammation of the heart muscle. This is another rare but potentially serious side effect of immune checkpoint inhibitors.</p> <p>It's important for this patient to be evaluated by their healthcare provider as soon as possible. Treatment typically involves discontinuing the immune checkpoint inhibitor and initiating corticosteroids or other immunosuppressive medications to control the inflammation. In severe cases, additional treatments may be needed.</p> <p>Please note that this is a potential diagnosis based on the provided information and other diagnoses could also be possible. It's also crucial to rule out other causes of these symptoms, such as infection or progression of the cancer itself.</p> | <p>The patient's symptoms of progressive muscle weakness, fatigue, myalgias, leg swelling along with elevated creatine kinase and troponin levels suggest that they may have immune-mediated myositis, a potential side effect of pembrolizumab and other immune checkpoint inhibitors. Immune-mediated myositis involves inflammation and damage to the muscles, which can lead to muscle weakness and pain.</p> <p>The restrictive pattern on spirometry could indicate respiratory muscle weakness, which can be a feature of myositis if the diaphragm or intercostal muscles are affected.</p> <p>The elevated troponin could indicate myocardial involvement, raising concern for myocarditis, an inflammation of the heart muscle, which can be a concomitant presentation with myositis in patients receiving immune checkpoint inhibitors. This is a serious condition that requires urgent evaluation.</p> <p>However, other differential diagnoses should also be considered given this patient's presentation, including other causes of myopathy, congestive heart failure, and pulmonary conditions such as interstitial lung disease.</p> <p>The management of immune-mediated myositis generally involves discontinuing the offending drug, administering high-dose corticosteroids, and potentially other immunosuppressant therapies. It's critical to consult with the healthcare provider for specific patient management strategies. This condition should be treated promptly, given that it can lead to life-threatening complications if left untreated.</p> |
|-------------------|-------------------------------------------------------------------------------------------------------------------------------------------------------------------------------------------------------------------------------------------------------------------------------------------------------------------------------------------------------------------------------------------------------------------------------------------------------------------------------------------------------------------------------------------------------------------------------------------------------------------------------------------------------------------------------------------------------------------------------------------------------------------------------------------------------------------------------------------------------------------------------------------------------------------------------------------------------------------------------------------------------------------------------------------------------------------------------------------------------------------------------------------------------------------------------------------------------------------------------------------------------------------------------------------------------------------------------------------------------------------------------------------------------------------------------------------------------------------------------------------------------------------------------------------------------------------------------|--------------------------------------------------------------------------------------------------------------------------------------------------------------------------------------------------------------------------------------------------------------------------------------------------------------------------------------------------------------------------------------------------------------------------------------------------------------------------------------------------------------------------------------------------------------------------------------------------------------------------------------------------------------------------------------------------------------------------------------------------------------------------------------------------------------------------------------------------------------------------------------------------------------------------------------------------------------------------------------------------------------------------------------------------------------------------------------------------------------------------------------------------------------------------------------------------------------------------------------------------------------------------------------------------------------------------------------------------------------------------------------------------------------------------------------------------------------------------------------------------------------|--------------------------------------------------------------------------------------------------------------------------------------------------------------------------------------------------------------------------------------------------------------------------------------------------------------------------------------------------------------------------------------------------------------------------------------------------------------------------------------------------------------------------------------------------------------------------------------------------------------------------------------------------------------------------------------------------------------------------------------------------------------------------------------------------------------------------------------------------------------------------------------------------------------------------------------------------------------------------------------------------------------------------------------------------------------------------------------------------------------------------------------------------------------------------------------------------------------------------------------------------------------------------------------------------------------------------------------------------------------------------------------------------------------------------------------------------------------------------------------------------------------------------------------------------------------------------------------|



|            |                                                                                                                                                                                                                                                                                                                                                                                                                                                                                                                                                                                                                                                                                                                                                                                                                                                                                                                                                                                                                                                                                                                                                                                                                                                                                                                                                                                                                                                                                                                                                                                              |                                                                                                                                                                                                                                                                                                                                                                                                                                                                                                                                                                                                                                                                                                                                                                                                                                                                                                                                                                                                                                                                                                                                                                                                                                                                                                                                                                                                                                                                                                                                                                                                                                                                                                                                                                                                                                                                                                                                                                                                                                                                                                                                             |                                                                                                                                                                                                                                                                                                                                                                                                                                                                                                                                                                                                                                                                                                                                                                                                                                                                                                                                                                                                                                                                                                                                                                                                                                                                                                                                                                                                                                                                                                                                                                                                                                                                                                                                                                                                                                                                                                                                                      |
|------------|----------------------------------------------------------------------------------------------------------------------------------------------------------------------------------------------------------------------------------------------------------------------------------------------------------------------------------------------------------------------------------------------------------------------------------------------------------------------------------------------------------------------------------------------------------------------------------------------------------------------------------------------------------------------------------------------------------------------------------------------------------------------------------------------------------------------------------------------------------------------------------------------------------------------------------------------------------------------------------------------------------------------------------------------------------------------------------------------------------------------------------------------------------------------------------------------------------------------------------------------------------------------------------------------------------------------------------------------------------------------------------------------------------------------------------------------------------------------------------------------------------------------------------------------------------------------------------------------|---------------------------------------------------------------------------------------------------------------------------------------------------------------------------------------------------------------------------------------------------------------------------------------------------------------------------------------------------------------------------------------------------------------------------------------------------------------------------------------------------------------------------------------------------------------------------------------------------------------------------------------------------------------------------------------------------------------------------------------------------------------------------------------------------------------------------------------------------------------------------------------------------------------------------------------------------------------------------------------------------------------------------------------------------------------------------------------------------------------------------------------------------------------------------------------------------------------------------------------------------------------------------------------------------------------------------------------------------------------------------------------------------------------------------------------------------------------------------------------------------------------------------------------------------------------------------------------------------------------------------------------------------------------------------------------------------------------------------------------------------------------------------------------------------------------------------------------------------------------------------------------------------------------------------------------------------------------------------------------------------------------------------------------------------------------------------------------------------------------------------------------------|------------------------------------------------------------------------------------------------------------------------------------------------------------------------------------------------------------------------------------------------------------------------------------------------------------------------------------------------------------------------------------------------------------------------------------------------------------------------------------------------------------------------------------------------------------------------------------------------------------------------------------------------------------------------------------------------------------------------------------------------------------------------------------------------------------------------------------------------------------------------------------------------------------------------------------------------------------------------------------------------------------------------------------------------------------------------------------------------------------------------------------------------------------------------------------------------------------------------------------------------------------------------------------------------------------------------------------------------------------------------------------------------------------------------------------------------------------------------------------------------------------------------------------------------------------------------------------------------------------------------------------------------------------------------------------------------------------------------------------------------------------------------------------------------------------------------------------------------------------------------------------------------------------------------------------------------------|
| <p>Q44</p> | <p>The symptoms you describe suggest the possibility of hypophysitis, an inflammation of the pituitary gland that can be a side effect of immunotherapy, particularly with the combination of ipilimumab and nivolumab.</p> <p>Symptoms of hypophysitis can include headache, nausea, and fatigue, and in severe cases, visual changes due to swelling of the pituitary gland causing compression on the optic chiasm, leading to bitemporal visual field loss. Hypophysitis can also disrupt the pituitary gland's production of hormones, leading to symptoms like orthostatic hypotension due to adrenal insufficiency and low thyroid stimulating hormone (TSH) indicating central hypothyroidism.</p> <p>Management of hypophysitis generally includes discontinuation of the causative agent, initiation of high-dose corticosteroids to reduce inflammation and swelling, and hormone replacement therapy for any pituitary insufficiencies (like steroids for adrenal insufficiency and levothyroxine for hypothyroidism).</p> <p>This patient should also be referred to an endocrinologist for further management, and she may need imaging studies like an MRI of the brain to confirm the diagnosis and monitor the response to treatment.</p> <p>It's important to note that this is a serious condition that needs to be addressed urgently. Other conditions like meningitis should also be considered and ruled out, given the symptoms of headache, meningism, photophobia, and nausea. Therefore, an immediate consultation with a healthcare provider is recommended.</p> | <p>The symptoms described in this patient - headache, meningism, photophobia, nausea, bitemporal visual field loss, orthostatic hypotension, and low thyroid-stimulating hormone (TSH) - are suggestive of hypophysitis. Hypophysitis is inflammation of the pituitary gland and can be a side effect of immunotherapies such as ipilimumab and nivolumab.</p> <p>The pituitary gland regulates several hormone pathways in the body. Inflammation can disrupt its function, leading to deficiencies in hormones it controls. The low TSH and symptoms of orthostatic hypotension suggest secondary hypothyroidism and adrenal insufficiency, respectively, which are indicative of pituitary involvement.</p> <p>The bitemporal visual field loss suggests the swelling of the pituitary gland is causing compression on the optic chiasm, a junction of optic nerves located above the pituitary gland.</p> <p>In terms of management, the suspected diagnosis of hypophysitis should be confirmed with an MRI of the brain to visualize the pituitary gland. This is usually performed urgently given the patient's visual symptoms. Endocrine evaluation, including further hormonal testing, is also necessary.</p> <p>The treatment usually involves hormone replacement therapy for the deficiencies (such as hydrocortisone for adrenal insufficiency and levothyroxine for hypothyroidism) and high-dose corticosteroids to reduce inflammation of the pituitary. In severe cases or those not responding to steroids, other immunosuppressants may be considered.</p> <p>The immunotherapy (ipilimumab and nivolumab) might also need to be stopped, at least temporarily, depending on the severity of the hypophysitis. Decisions regarding the continuation of cancer treatment should be made in collaboration with the patient's oncologist.</p> <p>It's important to consider other diagnoses that could cause similar symptoms, such as meningitis or other central nervous system infections, especially if the patient's condition deteriorates rapidly. Urgent medical attention is warranted given these symptoms.</p> | <p>The symptoms presented are suggestive of hypophysitis, an inflammation of the pituitary gland. Hypophysitis is a known adverse event associated with immune checkpoint inhibitors like ipilimumab and nivolumab.</p> <p>The pituitary gland, also known as the "master gland," controls many hormonal functions in the body. When inflamed, it can lead to various endocrine deficiencies. In this case, the low thyroid-stimulating hormone (TSH) suggests secondary hypothyroidism, and orthostatic hypotension may indicate adrenal insufficiency.</p> <p>The patient's visual symptoms and headache are concerning for an enlarged pituitary (pituitary adenoma or pituitary apoplexy) which can compress the optic chiasm leading to bitemporal hemianopia.</p> <p>Immediate management would likely involve the following steps:</p> <ol style="list-style-type: none"> <li>1. Discontinuation of the immunotherapies (ipilimumab and nivolumab) until the patient is stabilized and the situation is fully evaluated.</li> <li>2. High-dose corticosteroids to reduce the inflammation in the pituitary gland.</li> <li>3. Hormone replacement therapy to manage the endocrine deficiencies. For example, levothyroxine for hypothyroidism and potentially hydrocortisone or fludrocortisone for adrenal insufficiency.</li> <li>4. Consultation with an endocrinologist for specialized management of these complex hormonal issues.</li> <li>5. An urgent neuro-ophthalmological and neurosurgical evaluation given the bitemporal hemianopia and headache. An MRI of the brain would be needed to visualize the pituitary gland and assess for any mass effect on the optic chiasm.</li> </ol> <p>It's important to remember that this is a serious condition and requires immediate medical attention. This response is intended for general informational purposes and doesn't replace a consultation with a healthcare provider.</p> |
|------------|----------------------------------------------------------------------------------------------------------------------------------------------------------------------------------------------------------------------------------------------------------------------------------------------------------------------------------------------------------------------------------------------------------------------------------------------------------------------------------------------------------------------------------------------------------------------------------------------------------------------------------------------------------------------------------------------------------------------------------------------------------------------------------------------------------------------------------------------------------------------------------------------------------------------------------------------------------------------------------------------------------------------------------------------------------------------------------------------------------------------------------------------------------------------------------------------------------------------------------------------------------------------------------------------------------------------------------------------------------------------------------------------------------------------------------------------------------------------------------------------------------------------------------------------------------------------------------------------|---------------------------------------------------------------------------------------------------------------------------------------------------------------------------------------------------------------------------------------------------------------------------------------------------------------------------------------------------------------------------------------------------------------------------------------------------------------------------------------------------------------------------------------------------------------------------------------------------------------------------------------------------------------------------------------------------------------------------------------------------------------------------------------------------------------------------------------------------------------------------------------------------------------------------------------------------------------------------------------------------------------------------------------------------------------------------------------------------------------------------------------------------------------------------------------------------------------------------------------------------------------------------------------------------------------------------------------------------------------------------------------------------------------------------------------------------------------------------------------------------------------------------------------------------------------------------------------------------------------------------------------------------------------------------------------------------------------------------------------------------------------------------------------------------------------------------------------------------------------------------------------------------------------------------------------------------------------------------------------------------------------------------------------------------------------------------------------------------------------------------------------------|------------------------------------------------------------------------------------------------------------------------------------------------------------------------------------------------------------------------------------------------------------------------------------------------------------------------------------------------------------------------------------------------------------------------------------------------------------------------------------------------------------------------------------------------------------------------------------------------------------------------------------------------------------------------------------------------------------------------------------------------------------------------------------------------------------------------------------------------------------------------------------------------------------------------------------------------------------------------------------------------------------------------------------------------------------------------------------------------------------------------------------------------------------------------------------------------------------------------------------------------------------------------------------------------------------------------------------------------------------------------------------------------------------------------------------------------------------------------------------------------------------------------------------------------------------------------------------------------------------------------------------------------------------------------------------------------------------------------------------------------------------------------------------------------------------------------------------------------------------------------------------------------------------------------------------------------------|

|            |                                                                                                                                                                                                                                                                                                                                                                                                                                                                                                                                                                                                                                                                                                                                                                                                                                                                                                                                                                                                                                                                                                                                                                                                                                                                                                                                                                                                                                                                                                                                                                                                                                                                                                                                                                                                                                     |                                                                                                                                                                                                                                                                                                                                                                                                                                                                                                                                                                                                                                                                                                                                                                                                                                                                                                                                                                                                                                                                                                                                                                                                                                                                                                                                                                                                                                                                                                                                                                                                                                                                                                                                                                                                                                     |                                                                                                                                                                                                                                                                                                                                                                                                                                                                                                                                                                                                                                                                                                                                                                                                                                                                                                                                                                                                                                                                                                                                                                                                                                                                                                                                                                                                                                                                                                                                                                                                                                                                                                                                                                                                                                     |
|------------|-------------------------------------------------------------------------------------------------------------------------------------------------------------------------------------------------------------------------------------------------------------------------------------------------------------------------------------------------------------------------------------------------------------------------------------------------------------------------------------------------------------------------------------------------------------------------------------------------------------------------------------------------------------------------------------------------------------------------------------------------------------------------------------------------------------------------------------------------------------------------------------------------------------------------------------------------------------------------------------------------------------------------------------------------------------------------------------------------------------------------------------------------------------------------------------------------------------------------------------------------------------------------------------------------------------------------------------------------------------------------------------------------------------------------------------------------------------------------------------------------------------------------------------------------------------------------------------------------------------------------------------------------------------------------------------------------------------------------------------------------------------------------------------------------------------------------------------|-------------------------------------------------------------------------------------------------------------------------------------------------------------------------------------------------------------------------------------------------------------------------------------------------------------------------------------------------------------------------------------------------------------------------------------------------------------------------------------------------------------------------------------------------------------------------------------------------------------------------------------------------------------------------------------------------------------------------------------------------------------------------------------------------------------------------------------------------------------------------------------------------------------------------------------------------------------------------------------------------------------------------------------------------------------------------------------------------------------------------------------------------------------------------------------------------------------------------------------------------------------------------------------------------------------------------------------------------------------------------------------------------------------------------------------------------------------------------------------------------------------------------------------------------------------------------------------------------------------------------------------------------------------------------------------------------------------------------------------------------------------------------------------------------------------------------------------|-------------------------------------------------------------------------------------------------------------------------------------------------------------------------------------------------------------------------------------------------------------------------------------------------------------------------------------------------------------------------------------------------------------------------------------------------------------------------------------------------------------------------------------------------------------------------------------------------------------------------------------------------------------------------------------------------------------------------------------------------------------------------------------------------------------------------------------------------------------------------------------------------------------------------------------------------------------------------------------------------------------------------------------------------------------------------------------------------------------------------------------------------------------------------------------------------------------------------------------------------------------------------------------------------------------------------------------------------------------------------------------------------------------------------------------------------------------------------------------------------------------------------------------------------------------------------------------------------------------------------------------------------------------------------------------------------------------------------------------------------------------------------------------------------------------------------------------|
| <p>Q45</p> | <p>The symptoms described in this patient - new-onset chest pain, pre-syncope, and tachycardia with ST segment depression on ECG - are concerning for acute coronary syndrome (ACS), which includes conditions such as unstable angina or myocardial infarction (heart attack). These symptoms represent a medical emergency and require immediate evaluation and management.</p> <p>However, given the patient is receiving durvalumab, a type of immune checkpoint inhibitor, it's also essential to consider the possibility of an immune-related adverse event. Durvalumab can cause myocarditis, a rare but serious inflammation of the heart muscle that can present similarly to ACS. Myocarditis can lead to life-threatening arrhythmias and heart failure.</p> <p>In both scenarios, the patient requires immediate hospitalization.</p> <p>The management of suspected ACS generally includes antiplatelet therapy, anticoagulation, nitroglycerin for chest pain, and potentially revascularization procedures depending on the severity and extent of coronary artery involvement.</p> <p>If myocarditis is suspected, durvalumab should be discontinued, and high-dose corticosteroids should be initiated once ACS and other causes have been ruled out. In severe cases, other immunosuppressive therapies may be required.</p> <p>A cardiology consultation would be necessary for further evaluation, which may include additional diagnostic studies like cardiac enzymes, echocardiogram, and potentially cardiac MRI or even endomyocardial biopsy if myocarditis is strongly suspected.</p> <p>Remember, this is a very serious situation, and immediate medical attention is warranted. This response is for general informational purposes and doesn't replace consultation with a healthcare provider.</p> | <p>The symptoms described in this patient - new-onset chest pain, pre-syncope, and tachycardia with ST segment depression on ECG - are concerning for acute coronary syndrome (ACS), which includes conditions such as unstable angina or myocardial infarction (heart attack). These symptoms represent a medical emergency and require immediate evaluation and management.</p> <p>However, given the patient is receiving durvalumab, a type of immune checkpoint inhibitor, it's also essential to consider the possibility of an immune-related adverse event. Durvalumab can cause myocarditis, a rare but serious inflammation of the heart muscle that can present similarly to ACS. Myocarditis can lead to life-threatening arrhythmias and heart failure.</p> <p>In both scenarios, the patient requires immediate hospitalization.</p> <p>The management of suspected ACS generally includes antiplatelet therapy, anticoagulation, nitroglycerin for chest pain, and potentially revascularization procedures depending on the severity and extent of coronary artery involvement.</p> <p>If myocarditis is suspected, durvalumab should be discontinued, and high-dose corticosteroids should be initiated once ACS and other causes have been ruled out. In severe cases, other immunosuppressive therapies may be required.</p> <p>A cardiology consultation would be necessary for further evaluation, which may include additional diagnostic studies like cardiac enzymes, echocardiogram, and potentially cardiac MRI or even endomyocardial biopsy if myocarditis is strongly suspected.</p> <p>Remember, this is a very serious situation, and immediate medical attention is warranted. This response is for general informational purposes and doesn't replace consultation with a healthcare provider.</p> | <p>The symptoms described in this patient - new-onset chest pain, pre-syncope, and tachycardia with ST segment depression on ECG - are concerning for acute coronary syndrome (ACS), which includes conditions such as unstable angina or myocardial infarction (heart attack). These symptoms represent a medical emergency and require immediate evaluation and management.</p> <p>However, given the patient is receiving durvalumab, a type of immune checkpoint inhibitor, it's also essential to consider the possibility of an immune-related adverse event. Durvalumab can cause myocarditis, a rare but serious inflammation of the heart muscle that can present similarly to ACS. Myocarditis can lead to life-threatening arrhythmias and heart failure.</p> <p>In both scenarios, the patient requires immediate hospitalization.</p> <p>The management of suspected ACS generally includes antiplatelet therapy, anticoagulation, nitroglycerin for chest pain, and potentially revascularization procedures depending on the severity and extent of coronary artery involvement.</p> <p>If myocarditis is suspected, durvalumab should be discontinued, and high-dose corticosteroids should be initiated once ACS and other causes have been ruled out. In severe cases, other immunosuppressive therapies may be required.</p> <p>A cardiology consultation would be necessary for further evaluation, which may include additional diagnostic studies like cardiac enzymes, echocardiogram, and potentially cardiac MRI or even endomyocardial biopsy if myocarditis is strongly suspected.</p> <p>Remember, this is a very serious situation, and immediate medical attention is warranted. This response is for general informational purposes and doesn't replace consultation with a healthcare provider.</p> |
|------------|-------------------------------------------------------------------------------------------------------------------------------------------------------------------------------------------------------------------------------------------------------------------------------------------------------------------------------------------------------------------------------------------------------------------------------------------------------------------------------------------------------------------------------------------------------------------------------------------------------------------------------------------------------------------------------------------------------------------------------------------------------------------------------------------------------------------------------------------------------------------------------------------------------------------------------------------------------------------------------------------------------------------------------------------------------------------------------------------------------------------------------------------------------------------------------------------------------------------------------------------------------------------------------------------------------------------------------------------------------------------------------------------------------------------------------------------------------------------------------------------------------------------------------------------------------------------------------------------------------------------------------------------------------------------------------------------------------------------------------------------------------------------------------------------------------------------------------------|-------------------------------------------------------------------------------------------------------------------------------------------------------------------------------------------------------------------------------------------------------------------------------------------------------------------------------------------------------------------------------------------------------------------------------------------------------------------------------------------------------------------------------------------------------------------------------------------------------------------------------------------------------------------------------------------------------------------------------------------------------------------------------------------------------------------------------------------------------------------------------------------------------------------------------------------------------------------------------------------------------------------------------------------------------------------------------------------------------------------------------------------------------------------------------------------------------------------------------------------------------------------------------------------------------------------------------------------------------------------------------------------------------------------------------------------------------------------------------------------------------------------------------------------------------------------------------------------------------------------------------------------------------------------------------------------------------------------------------------------------------------------------------------------------------------------------------------|-------------------------------------------------------------------------------------------------------------------------------------------------------------------------------------------------------------------------------------------------------------------------------------------------------------------------------------------------------------------------------------------------------------------------------------------------------------------------------------------------------------------------------------------------------------------------------------------------------------------------------------------------------------------------------------------------------------------------------------------------------------------------------------------------------------------------------------------------------------------------------------------------------------------------------------------------------------------------------------------------------------------------------------------------------------------------------------------------------------------------------------------------------------------------------------------------------------------------------------------------------------------------------------------------------------------------------------------------------------------------------------------------------------------------------------------------------------------------------------------------------------------------------------------------------------------------------------------------------------------------------------------------------------------------------------------------------------------------------------------------------------------------------------------------------------------------------------|

Google BARD - MECHANISMS

|           |                                                                                                                                                                                                                                                                                                                                                                                                                                                                                                                                                                                                                                                                                                                                                                                                                                                                                                                                                                                                                                                                                                                                                                                                                                                                                                                                                                                                                                                                                                                                                                                                                                                                                                                                                                                                                                                                                                                                                                                                                                                                                                                                                               |                                                                                                                                                                                                                                                                                                                                                                                                                                                                                                                                                                                                                                                                                                                                                                                                                                                                                                                                                                                                                                                                                                                                                                                                                                                                                                                                                                                                                                                                                   |                                                                                                                                                                                                                                                                                                                                                                                                                                                                                                                                                                                                                                                                                                                                                                                                                                                                                                                                                                                                                                                                                                                                                                                                                                                                                                                                                                                                                                                                    |
|-----------|---------------------------------------------------------------------------------------------------------------------------------------------------------------------------------------------------------------------------------------------------------------------------------------------------------------------------------------------------------------------------------------------------------------------------------------------------------------------------------------------------------------------------------------------------------------------------------------------------------------------------------------------------------------------------------------------------------------------------------------------------------------------------------------------------------------------------------------------------------------------------------------------------------------------------------------------------------------------------------------------------------------------------------------------------------------------------------------------------------------------------------------------------------------------------------------------------------------------------------------------------------------------------------------------------------------------------------------------------------------------------------------------------------------------------------------------------------------------------------------------------------------------------------------------------------------------------------------------------------------------------------------------------------------------------------------------------------------------------------------------------------------------------------------------------------------------------------------------------------------------------------------------------------------------------------------------------------------------------------------------------------------------------------------------------------------------------------------------------------------------------------------------------------------|-----------------------------------------------------------------------------------------------------------------------------------------------------------------------------------------------------------------------------------------------------------------------------------------------------------------------------------------------------------------------------------------------------------------------------------------------------------------------------------------------------------------------------------------------------------------------------------------------------------------------------------------------------------------------------------------------------------------------------------------------------------------------------------------------------------------------------------------------------------------------------------------------------------------------------------------------------------------------------------------------------------------------------------------------------------------------------------------------------------------------------------------------------------------------------------------------------------------------------------------------------------------------------------------------------------------------------------------------------------------------------------------------------------------------------------------------------------------------------------|--------------------------------------------------------------------------------------------------------------------------------------------------------------------------------------------------------------------------------------------------------------------------------------------------------------------------------------------------------------------------------------------------------------------------------------------------------------------------------------------------------------------------------------------------------------------------------------------------------------------------------------------------------------------------------------------------------------------------------------------------------------------------------------------------------------------------------------------------------------------------------------------------------------------------------------------------------------------------------------------------------------------------------------------------------------------------------------------------------------------------------------------------------------------------------------------------------------------------------------------------------------------------------------------------------------------------------------------------------------------------------------------------------------------------------------------------------------------|
| <p>Q1</p> | <p>No, immunotherapy drugs do not directly kill cancer cells. Instead, they work by stimulating the body's own immune system to attack and kill cancer cells. This can be done in a number of ways, such as:</p> <p>* **Checkpoint inhibitors:** These drugs block proteins on the surface of cancer cells that help them evade the immune system. This allows the immune system to see and attack the cancer cells.</p> <p>* **Monoclonal antibodies:** These drugs are made to target specific molecules on the surface of cancer cells. When the antibody binds to the molecule, it triggers the immune system to attack the cancer cell.</p> <p>* **T-cell therapy:** This type of immunotherapy involves taking T cells from a patient's body, modifying them in the lab to better target cancer cells, and then giving them back to the patient. These modified T cells can then attack and kill cancer cells.</p> <p>In some cases, immunotherapy drugs can cause the immune system to attack healthy cells as well. This can lead to side effects such as inflammation, rash, and diarrhea. However, immunotherapy can be a very effective treatment for cancer, and it is often used in combination with other cancer treatments, such as chemotherapy and radiation therapy.</p> <p>Here are some additional resources that you may find helpful:</p> <p>* Cancer Immunotherapy: <a href="https://www.cancer.gov/about-cancer/treatment/types/immunotherapy">https://www.cancer.gov/about-cancer/treatment/types/immunotherapy</a> from the National Cancer Institute</p> <p>* Immunotherapy for Cancer: <a href="https://www.cancer.net/navigating-cancer-care/how-cancer-treated/immunotherapy-and-vaccines">https://www.cancer.net/navigating-cancer-care/how-cancer-treated/immunotherapy-and-vaccines</a> from Cancer.Net</p> <p>* Immunotherapy Side Effects: <a href="https://www.cancer.net/navigating-cancer-care/how-cancer-treated/immunotherapy-and-vaccines/side-effects-immunotherapy">https://www.cancer.net/navigating-cancer-care/how-cancer-treated/immunotherapy-and-vaccines/side-effects-immunotherapy</a> from Cancer.Net</p> | <p>No, immunotherapy drugs do not directly kill cancer cells. Instead, they work by <b>boosting the body's immune system</b> to attack and kill cancer cells. This can be done in a number of ways, such as:</p> <p>* **Checkpoint inhibitors:** These drugs block proteins on the surface of cancer cells that help them evade the immune system. This allows the immune system to see and attack the cancer cells.</p> <p>* **Monoclonal antibodies:** These drugs are made to target specific molecules on the surface of cancer cells. When the antibody binds to the molecule, it triggers the immune system to attack the cancer cell.</p> <p>* **T-cell therapy:** This type of immunotherapy involves taking T cells from a patient's body, modifying them in the lab to better target cancer cells, and then giving them back to the patient. These modified T cells can then attack and kill cancer cells.</p> <p>In some cases, immunotherapy drugs can cause the immune system to attack healthy cells as well. This can lead to side effects such as inflammation, rash, and diarrhea. However, immunotherapy can be a very effective treatment for cancer, and it is often used in combination with other cancer treatments, such as chemotherapy and radiation therapy.</p> <p>To answer your question directly, immunotherapy drugs do not directly kill cancer cells. They work by stimulating the body's own immune system to attack and kill cancer cells.</p> | <p>No, immunotherapy drugs do not directly kill cancer cells. They work by <b>activating the immune system</b> to attack and kill cancer cells. This can be done in a number of ways, such as:</p> <p>* **Checkpoint inhibitors:** These drugs block proteins on the surface of cancer cells that help them evade the immune system. This allows the immune system to see and attack the cancer cells.</p> <p>* **Monoclonal antibodies:** These drugs are made to target specific molecules on the surface of cancer cells. When the antibody binds to the molecule, it triggers the immune system to attack the cancer cell.</p> <p>* **T-cell therapy:** This type of immunotherapy involves taking T cells from a patient's body, modifying them in the lab to better target cancer cells, and then giving them back to the patient. These modified T cells can then attack and kill cancer cells.</p> <p>In some cases, immunotherapy drugs can cause the immune system to attack healthy cells as well. This can lead to side effects such as inflammation, rash, and diarrhea. However, immunotherapy can be a very effective treatment for cancer, and it is often used in combination with other cancer treatments, such as chemotherapy and radiation therapy.</p> <p>To answer your question directly, immunotherapy drugs do not directly kill cancer cells. They work by activating the body's own immune system to attack and kill cancer cells.</p> |
|-----------|---------------------------------------------------------------------------------------------------------------------------------------------------------------------------------------------------------------------------------------------------------------------------------------------------------------------------------------------------------------------------------------------------------------------------------------------------------------------------------------------------------------------------------------------------------------------------------------------------------------------------------------------------------------------------------------------------------------------------------------------------------------------------------------------------------------------------------------------------------------------------------------------------------------------------------------------------------------------------------------------------------------------------------------------------------------------------------------------------------------------------------------------------------------------------------------------------------------------------------------------------------------------------------------------------------------------------------------------------------------------------------------------------------------------------------------------------------------------------------------------------------------------------------------------------------------------------------------------------------------------------------------------------------------------------------------------------------------------------------------------------------------------------------------------------------------------------------------------------------------------------------------------------------------------------------------------------------------------------------------------------------------------------------------------------------------------------------------------------------------------------------------------------------------|-----------------------------------------------------------------------------------------------------------------------------------------------------------------------------------------------------------------------------------------------------------------------------------------------------------------------------------------------------------------------------------------------------------------------------------------------------------------------------------------------------------------------------------------------------------------------------------------------------------------------------------------------------------------------------------------------------------------------------------------------------------------------------------------------------------------------------------------------------------------------------------------------------------------------------------------------------------------------------------------------------------------------------------------------------------------------------------------------------------------------------------------------------------------------------------------------------------------------------------------------------------------------------------------------------------------------------------------------------------------------------------------------------------------------------------------------------------------------------------|--------------------------------------------------------------------------------------------------------------------------------------------------------------------------------------------------------------------------------------------------------------------------------------------------------------------------------------------------------------------------------------------------------------------------------------------------------------------------------------------------------------------------------------------------------------------------------------------------------------------------------------------------------------------------------------------------------------------------------------------------------------------------------------------------------------------------------------------------------------------------------------------------------------------------------------------------------------------------------------------------------------------------------------------------------------------------------------------------------------------------------------------------------------------------------------------------------------------------------------------------------------------------------------------------------------------------------------------------------------------------------------------------------------------------------------------------------------------|

|                  |                                                                                                                                                                                                                                                                                                                                                                                                                                                                                                                                                                                                                                                                                                                                                                                                                                                                                                                                                                                                                                                                                                                                                                                                                                                                                                                                                                                                                                                                                                                                                                                                                                                                                                                                                                                                                                                                                                                                                                                                                                                                                                                                                                                                         |                                                                                                                                                                                                                                                                                                                                                                                                                                                                                                                                                                                                                                                                                                                                                                                                                                                                                                                                                                                                                                                                                                                                                                                                                                                                                                                                                                                                                                                                                                                                                                                                                                                                                                                                                                                                                                                                                                                                                                                                                                                                                                                                                                                                                                                                           |                                                                                                                                                                                                                                                                                                                                                                                                                                                                                                                                                                                                                                                                                                                                                                                                                                                                                                                                                                                                                                                                                                                                                                                                                                                                                                                                                                                                                                                                                                                                                                                                                                                                                                                                                                                                                                                                                                                                                                                                                                                                                                                                                                                                                                                                                                                                                                                                                                                                                        |
|------------------|---------------------------------------------------------------------------------------------------------------------------------------------------------------------------------------------------------------------------------------------------------------------------------------------------------------------------------------------------------------------------------------------------------------------------------------------------------------------------------------------------------------------------------------------------------------------------------------------------------------------------------------------------------------------------------------------------------------------------------------------------------------------------------------------------------------------------------------------------------------------------------------------------------------------------------------------------------------------------------------------------------------------------------------------------------------------------------------------------------------------------------------------------------------------------------------------------------------------------------------------------------------------------------------------------------------------------------------------------------------------------------------------------------------------------------------------------------------------------------------------------------------------------------------------------------------------------------------------------------------------------------------------------------------------------------------------------------------------------------------------------------------------------------------------------------------------------------------------------------------------------------------------------------------------------------------------------------------------------------------------------------------------------------------------------------------------------------------------------------------------------------------------------------------------------------------------------------|---------------------------------------------------------------------------------------------------------------------------------------------------------------------------------------------------------------------------------------------------------------------------------------------------------------------------------------------------------------------------------------------------------------------------------------------------------------------------------------------------------------------------------------------------------------------------------------------------------------------------------------------------------------------------------------------------------------------------------------------------------------------------------------------------------------------------------------------------------------------------------------------------------------------------------------------------------------------------------------------------------------------------------------------------------------------------------------------------------------------------------------------------------------------------------------------------------------------------------------------------------------------------------------------------------------------------------------------------------------------------------------------------------------------------------------------------------------------------------------------------------------------------------------------------------------------------------------------------------------------------------------------------------------------------------------------------------------------------------------------------------------------------------------------------------------------------------------------------------------------------------------------------------------------------------------------------------------------------------------------------------------------------------------------------------------------------------------------------------------------------------------------------------------------------------------------------------------------------------------------------------------------------|----------------------------------------------------------------------------------------------------------------------------------------------------------------------------------------------------------------------------------------------------------------------------------------------------------------------------------------------------------------------------------------------------------------------------------------------------------------------------------------------------------------------------------------------------------------------------------------------------------------------------------------------------------------------------------------------------------------------------------------------------------------------------------------------------------------------------------------------------------------------------------------------------------------------------------------------------------------------------------------------------------------------------------------------------------------------------------------------------------------------------------------------------------------------------------------------------------------------------------------------------------------------------------------------------------------------------------------------------------------------------------------------------------------------------------------------------------------------------------------------------------------------------------------------------------------------------------------------------------------------------------------------------------------------------------------------------------------------------------------------------------------------------------------------------------------------------------------------------------------------------------------------------------------------------------------------------------------------------------------------------------------------------------------------------------------------------------------------------------------------------------------------------------------------------------------------------------------------------------------------------------------------------------------------------------------------------------------------------------------------------------------------------------------------------------------------------------------------------------------|
| <p><b>Q2</b></p> | <p>An immune checkpoint is a protein receptor on the surface of immune cells that helps regulate the immune response. Checkpoints are important for preventing the immune system from attacking healthy cells, but they can also be used by cancer cells to evade the immune system.</p> <p>There are two main types of immune checkpoints: <b>**inhibitory checkpoints**</b> and <b>**stimulatory checkpoints**</b>. Inhibitory checkpoints send signals to immune cells to stop or slow down the immune response, while stimulatory checkpoints send signals to immune cells to start or speed up the immune response.</p> <p>Cancer cells can use inhibitory checkpoints to avoid being attacked by the immune system. For example, cancer cells can express high levels of inhibitory checkpoint proteins, such as PD-1 and CTLA-4. When these proteins bind to their receptors on immune cells, it sends a signal to the immune cells to stop attacking the cancer cells.</p> <p>Immunotherapy drugs that target immune checkpoints can help to overcome this evasion by blocking the binding of inhibitory checkpoint proteins to their receptors. This allows the immune system to see and attack cancer cells.</p> <p>Some of the most common immune checkpoint inhibitors that are used to treat cancer include:</p> <ul style="list-style-type: none"> <li><b>**Nivolumab (Opdivo)**</b></li> <li><b>**Pembrolizumab (Keytruda)**</b></li> <li><b>**Atezolizumab (Tecentriq)**</b></li> <li><b>**Ipilimumab (Yervoy)**</b></li> <li><b>**Cemiplimab (Libtayo)**</b></li> </ul> <p>Immunotherapy drugs that target immune checkpoints have been shown to be effective in treating a variety of cancers, including melanoma, lung cancer, kidney cancer, and head and neck cancer. These drugs are often used in combination with other cancer treatments, such as chemotherapy and radiation therapy.</p> <p>Immunotherapy drugs can cause side effects, such as fatigue, rash, and diarrhea. In some cases, they can also cause more serious side effects, such as inflammation of the lungs or intestines. However, for many patients, the benefits of immunotherapy outweigh the risks.</p> | <p>An immune checkpoint is a protein receptor on the surface of immune cells that helps regulate the immune response. Checkpoints are important for preventing the immune system from attacking healthy cells, but they can also be used by cancer cells to evade the immune system.</p> <p>There are two main types of immune checkpoints: <b>**inhibitory checkpoints**</b> and <b>**stimulatory checkpoints**</b>. Inhibitory checkpoints send signals to immune cells to stop or slow down the immune response, while stimulatory checkpoints send signals to immune cells to start or speed up the immune response.</p> <p><b>**Some common inhibitory checkpoints include:**</b></p> <ul style="list-style-type: none"> <li><b>**PD-1**</b> (programmed death-1)</li> <li><b>**CTLA-4**</b> (cytotoxic T-lymphocyte-associated protein 4)</li> <li><b>**LAG-3**</b> (lymphocyte activation gene-3)</li> <li><b>**TIM-3**</b> (T-cell immunoglobulin and mucin domain-3)</li> <li><b>**BTLA**</b> (B and T lymphocyte attenuator)</li> </ul> <p>Cancer cells can use inhibitory checkpoints to avoid being attacked by the immune system. For example, cancer cells can express high levels of inhibitory checkpoint proteins, such as PD-1 and CTLA-4. When these proteins bind to their receptors on immune cells, it sends a signal to the immune cells to stop attacking the cancer cells.</p> <p><b>**Immunotherapy drugs that target immune checkpoints can help to overcome this evasion by blocking the binding of inhibitory checkpoint proteins to their receptors.**</b> This allows the immune system to see and attack cancer cells.</p> <p>Immunotherapy drugs that target immune checkpoints have been shown to be effective in treating a variety of cancers, including melanoma, lung cancer, kidney cancer, and head and neck cancer. These drugs are often used in combination with other cancer treatments, such as chemotherapy and radiation therapy.</p> <p>Immunotherapy drugs can cause side effects, such as fatigue, rash, and diarrhea. In some cases, they can also cause more serious side effects, such as inflammation of the lungs or intestines. However, for many patients, the benefits of immunotherapy outweigh the risks.</p> | <p>In immunology, an immune checkpoint is a protein receptor expressed by immune cells that regulates the immune response. Checkpoints are important for preventing the immune system from attacking healthy cells, but they can also be used by cancer cells to evade the immune system.</p> <p>There are two main types of immune checkpoints: <b>**inhibitory checkpoints**</b> and <b>**stimulatory checkpoints**</b>. <b>**Inhibitory checkpoints**</b> send signals to immune cells to stop or slow down the immune response, while <b>**stimulatory checkpoints**</b> send signals to immune cells to start or speed up the immune response.</p> <p>Here are some examples of immune checkpoints:</p> <ul style="list-style-type: none"> <li><b>**Programmed cell death 1 (PD-1)**</b>: PD-1 is an inhibitory checkpoint protein that is expressed on T cells. When PD-1 binds to its ligand, PD-L1, it sends a signal to the T cell to stop attacking the cell that is expressing PD-L1. Cancer cells can often express high levels of PD-L1, which can help them evade the immune system.</li> <li><b>**Cytotoxic T-lymphocyte-associated protein 4 (CTLA-4)**</b>: CTLA-4 is another inhibitory checkpoint protein that is expressed on T cells. When CTLA-4 binds to its ligand, B7-1 or B7-2, it sends a signal to the T cell to stop attacking the cell that is expressing B7-1 or B7-2. Cancer cells can often express high levels of B7-1 or B7-2, which can help them evade the immune system.</li> <li><b>**Lymphocyte activation gene-3 (LAG-3)**</b>: LAG-3 is a relatively new inhibitory checkpoint protein that is expressed on T cells. When LAG-3 binds to its ligand, CD80 or CD86, it sends a signal to the T cell to stop attacking the cell that is expressing CD80 or CD86. Cancer cells can often express high levels of CD80 or CD86, which can help them evade the immune system.</li> </ul> <p><b>**Immunotherapy drugs that target immune checkpoints**</b> can help to overcome this evasion by blocking the binding of inhibitory checkpoint proteins to their receptors. This allows the immune system to see and attack cancer cells.</p> <p>Immunotherapy drugs that target immune checkpoints have been shown to be effective in treating a variety of cancers, including melanoma, lung cancer, kidney cancer, and head and neck cancer. These drugs are often used in combination with other cancer treatments, such as chemotherapy and</p> |
|------------------|---------------------------------------------------------------------------------------------------------------------------------------------------------------------------------------------------------------------------------------------------------------------------------------------------------------------------------------------------------------------------------------------------------------------------------------------------------------------------------------------------------------------------------------------------------------------------------------------------------------------------------------------------------------------------------------------------------------------------------------------------------------------------------------------------------------------------------------------------------------------------------------------------------------------------------------------------------------------------------------------------------------------------------------------------------------------------------------------------------------------------------------------------------------------------------------------------------------------------------------------------------------------------------------------------------------------------------------------------------------------------------------------------------------------------------------------------------------------------------------------------------------------------------------------------------------------------------------------------------------------------------------------------------------------------------------------------------------------------------------------------------------------------------------------------------------------------------------------------------------------------------------------------------------------------------------------------------------------------------------------------------------------------------------------------------------------------------------------------------------------------------------------------------------------------------------------------------|---------------------------------------------------------------------------------------------------------------------------------------------------------------------------------------------------------------------------------------------------------------------------------------------------------------------------------------------------------------------------------------------------------------------------------------------------------------------------------------------------------------------------------------------------------------------------------------------------------------------------------------------------------------------------------------------------------------------------------------------------------------------------------------------------------------------------------------------------------------------------------------------------------------------------------------------------------------------------------------------------------------------------------------------------------------------------------------------------------------------------------------------------------------------------------------------------------------------------------------------------------------------------------------------------------------------------------------------------------------------------------------------------------------------------------------------------------------------------------------------------------------------------------------------------------------------------------------------------------------------------------------------------------------------------------------------------------------------------------------------------------------------------------------------------------------------------------------------------------------------------------------------------------------------------------------------------------------------------------------------------------------------------------------------------------------------------------------------------------------------------------------------------------------------------------------------------------------------------------------------------------------------------|----------------------------------------------------------------------------------------------------------------------------------------------------------------------------------------------------------------------------------------------------------------------------------------------------------------------------------------------------------------------------------------------------------------------------------------------------------------------------------------------------------------------------------------------------------------------------------------------------------------------------------------------------------------------------------------------------------------------------------------------------------------------------------------------------------------------------------------------------------------------------------------------------------------------------------------------------------------------------------------------------------------------------------------------------------------------------------------------------------------------------------------------------------------------------------------------------------------------------------------------------------------------------------------------------------------------------------------------------------------------------------------------------------------------------------------------------------------------------------------------------------------------------------------------------------------------------------------------------------------------------------------------------------------------------------------------------------------------------------------------------------------------------------------------------------------------------------------------------------------------------------------------------------------------------------------------------------------------------------------------------------------------------------------------------------------------------------------------------------------------------------------------------------------------------------------------------------------------------------------------------------------------------------------------------------------------------------------------------------------------------------------------------------------------------------------------------------------------------------------|

|  |  |  |                                                                                                                                                                                                                                                                                                                |
|--|--|--|----------------------------------------------------------------------------------------------------------------------------------------------------------------------------------------------------------------------------------------------------------------------------------------------------------------|
|  |  |  | <p>radiation therapy.</p> <p>Immunotherapy drugs can cause side effects, such as fatigue, rash, and diarrhea. In some cases, they can also cause more serious side effects, such as inflammation of the lungs or intestines. However, for many patients, the benefits of immunotherapy outweigh the risks.</p> |
|--|--|--|----------------------------------------------------------------------------------------------------------------------------------------------------------------------------------------------------------------------------------------------------------------------------------------------------------------|

|           |                                                                                                                                                                                                                                                                                                                                                                                                                                                                                                                                                                                                                                                                                                                                                                                                                                                                                                                                                                                                                                                                                                                                                                                                                                                                                                                                                                                                                                                                                                                                                                                                                                                                                                                                                                                                   |                                                                                                                                                                                                                                                                                                                                                                                                                                                                                                                                                                                                                                                                                                                                                                                                                                                                                                                                                                                                                                                                                                                                                                                                                                                                                                                                                                                                                                                                                                                                                                                                                                                                                                                                                                                                                                                                                                                                                                                                                                                            |                                                                                                                                                                                                                                                                                                                                                                                                                                                                                                                                                                                                                                                                                                                                                                                                                                                                                                                                                                                                                                                                                                                                                                                                                                                                                                                                                                                                                                                                                                                                                                                                                                                                                                                                                                                                                                                                                                                                                                                                                                                     |
|-----------|---------------------------------------------------------------------------------------------------------------------------------------------------------------------------------------------------------------------------------------------------------------------------------------------------------------------------------------------------------------------------------------------------------------------------------------------------------------------------------------------------------------------------------------------------------------------------------------------------------------------------------------------------------------------------------------------------------------------------------------------------------------------------------------------------------------------------------------------------------------------------------------------------------------------------------------------------------------------------------------------------------------------------------------------------------------------------------------------------------------------------------------------------------------------------------------------------------------------------------------------------------------------------------------------------------------------------------------------------------------------------------------------------------------------------------------------------------------------------------------------------------------------------------------------------------------------------------------------------------------------------------------------------------------------------------------------------------------------------------------------------------------------------------------------------|------------------------------------------------------------------------------------------------------------------------------------------------------------------------------------------------------------------------------------------------------------------------------------------------------------------------------------------------------------------------------------------------------------------------------------------------------------------------------------------------------------------------------------------------------------------------------------------------------------------------------------------------------------------------------------------------------------------------------------------------------------------------------------------------------------------------------------------------------------------------------------------------------------------------------------------------------------------------------------------------------------------------------------------------------------------------------------------------------------------------------------------------------------------------------------------------------------------------------------------------------------------------------------------------------------------------------------------------------------------------------------------------------------------------------------------------------------------------------------------------------------------------------------------------------------------------------------------------------------------------------------------------------------------------------------------------------------------------------------------------------------------------------------------------------------------------------------------------------------------------------------------------------------------------------------------------------------------------------------------------------------------------------------------------------------|-----------------------------------------------------------------------------------------------------------------------------------------------------------------------------------------------------------------------------------------------------------------------------------------------------------------------------------------------------------------------------------------------------------------------------------------------------------------------------------------------------------------------------------------------------------------------------------------------------------------------------------------------------------------------------------------------------------------------------------------------------------------------------------------------------------------------------------------------------------------------------------------------------------------------------------------------------------------------------------------------------------------------------------------------------------------------------------------------------------------------------------------------------------------------------------------------------------------------------------------------------------------------------------------------------------------------------------------------------------------------------------------------------------------------------------------------------------------------------------------------------------------------------------------------------------------------------------------------------------------------------------------------------------------------------------------------------------------------------------------------------------------------------------------------------------------------------------------------------------------------------------------------------------------------------------------------------------------------------------------------------------------------------------------------------|
| <p>Q3</p> | <p>Nivolumab and pembrolizumab are both <b>programmed cell death protein 1 (PD-1) inhibitors</b>. PD-1 is a protein receptor that is expressed on T cells, a type of white blood cell that plays a major role in the immune system. When PD-1 binds to its ligand, PD-L1, it sends a signal to the T cell to stop attacking the cell that is expressing PD-L1. Cancer cells can often express high levels of PD-L1, which can help them evade the immune system.</p> <p>Nivolumab and pembrolizumab work by blocking the binding of PD-1 to PD-L1. This allows T cells to see and attack cancer cells that would otherwise be able to evade the immune system. Nivolumab and pembrolizumab are both approved by the U.S. Food and Drug Administration (FDA) to treat a variety of cancers, including:</p> <ul style="list-style-type: none"> <li><b>Melanoma</b></li> <li><b>Non-small cell lung cancer (NSCLC)</b></li> <li><b>Head and neck cancer</b></li> <li><b>Kidney cancer</b></li> <li><b>Urothelial cancer</b></li> <li><b>Liver cancer</b></li> <li><b>Glioblastoma</b></li> <li><b>Hodgkin lymphoma</b></li> <li><b>Classical Hodgkin lymphoma</b></li> </ul> <p>Nivolumab and pembrolizumab are both given as intravenous infusions. They are usually given once every two weeks or once every four weeks. The most common side effects of nivolumab and pembrolizumab are fatigue, rash, diarrhea, and nausea. More serious side effects can occur, such as inflammation of the lungs or intestines.</p> <p>Nivolumab and pembrolizumab are both effective cancer treatments that have helped many patients. However, they are not without risks. It is important to talk to your doctor about the benefits and risks of nivolumab and pembrolizumab before starting treatment.</p> | <p>Nivolumab and pembrolizumab are both <b>immune checkpoint inhibitors</b>. They are monoclonal antibodies that work by blocking the interaction between programmed cell death protein 1 (PD-1) and its ligand, PD-L1. This interaction normally helps to suppress the immune system's response to cancer cells. By blocking this interaction, nivolumab and pembrolizumab can help the immune system to recognize and attack cancer cells.</p> <p>Nivolumab is marketed under the brand name <b>Opdivo</b>, and pembrolizumab is marketed under the brand name <b>Keytruda</b>. They are both FDA-approved to treat a variety of cancers, including:</p> <ul style="list-style-type: none"> <li><b>Melanoma</b></li> <li><b>Non-small cell lung cancer (NSCLC)</b></li> <li><b>Head and neck cancer</b></li> <li><b>Kidney cancer</b></li> <li><b>Urothelial cancer</b></li> <li><b>Liver cancer</b></li> <li><b>Glioblastoma</b></li> <li><b>Hodgkin lymphoma</b></li> <li><b>Classical Hodgkin lymphoma</b></li> </ul> <p>Nivolumab and pembrolizumab are given as intravenous infusions. They are usually given once every two weeks or once every four weeks. The most common side effects of nivolumab and pembrolizumab are fatigue, rash, diarrhea, and nausea. More serious side effects can occur, such as inflammation of the lungs or intestines.</p> <p>Nivolumab and pembrolizumab are both effective cancer treatments that have helped many patients. However, they are not without risks. It is important to talk to your doctor about the benefits and risks of nivolumab and pembrolizumab before starting treatment.</p> <p>Here are some additional details about nivolumab and pembrolizumab:</p> <p><b>Nivolumab</b> is a human monoclonal antibody that was first approved by the FDA in 2014. It is made by the pharmaceutical company Bristol Myers Squibb.</p> <p><b>Pembrolizumab</b> is a human monoclonal antibody that was first approved by the FDA in 2014. It is made by the pharmaceutical company Merck &amp; Co.</p> | <p>Nivolumab and pembrolizumab are both <b>checkpoint inhibitors</b>. They are monoclonal antibodies that work by blocking the interaction between programmed cell death protein 1 (PD-1) and its ligand, PD-L1. This interaction normally helps to suppress the immune system's response to cancer cells. By blocking this interaction, nivolumab and pembrolizumab can help the immune system to recognize and attack cancer cells.</p> <p>Nivolumab is marketed under the brand name <b>Opdivo</b>, and pembrolizumab is marketed under the brand name <b>Keytruda</b>. They are both FDA-approved to treat a variety of cancers, including:</p> <ul style="list-style-type: none"> <li><b>Melanoma</b></li> <li><b>Non-small cell lung cancer (NSCLC)</b></li> <li><b>Head and neck cancer</b></li> <li><b>Kidney cancer</b></li> <li><b>Urothelial cancer</b></li> <li><b>Liver cancer</b></li> <li><b>Glioblastoma</b></li> <li><b>Hodgkin lymphoma</b></li> <li><b>Classical Hodgkin lymphoma</b></li> </ul> <p>Nivolumab and pembrolizumab are given as intravenous infusions. They are usually given once every two weeks or once every four weeks. The most common side effects of nivolumab and pembrolizumab are fatigue, rash, diarrhea, and nausea. More serious side effects can occur, such as inflammation of the lungs or intestines.</p> <p>Nivolumab and pembrolizumab are both effective cancer treatments that have helped many patients. However, they are not without risks. It is important to talk to your doctor about the benefits and risks of nivolumab and pembrolizumab before starting treatment.</p> <p>Here are some additional details about nivolumab and pembrolizumab:</p> <p><b>Nivolumab</b> is a human monoclonal antibody that was first approved by the FDA in 2014. It is made by the pharmaceutical company Bristol Myers Squibb.</p> <p><b>Pembrolizumab</b> is a human monoclonal antibody that was first approved by the FDA in 2014. It is made by the pharmaceutical company Merck &amp; Co.</p> |
|-----------|---------------------------------------------------------------------------------------------------------------------------------------------------------------------------------------------------------------------------------------------------------------------------------------------------------------------------------------------------------------------------------------------------------------------------------------------------------------------------------------------------------------------------------------------------------------------------------------------------------------------------------------------------------------------------------------------------------------------------------------------------------------------------------------------------------------------------------------------------------------------------------------------------------------------------------------------------------------------------------------------------------------------------------------------------------------------------------------------------------------------------------------------------------------------------------------------------------------------------------------------------------------------------------------------------------------------------------------------------------------------------------------------------------------------------------------------------------------------------------------------------------------------------------------------------------------------------------------------------------------------------------------------------------------------------------------------------------------------------------------------------------------------------------------------------|------------------------------------------------------------------------------------------------------------------------------------------------------------------------------------------------------------------------------------------------------------------------------------------------------------------------------------------------------------------------------------------------------------------------------------------------------------------------------------------------------------------------------------------------------------------------------------------------------------------------------------------------------------------------------------------------------------------------------------------------------------------------------------------------------------------------------------------------------------------------------------------------------------------------------------------------------------------------------------------------------------------------------------------------------------------------------------------------------------------------------------------------------------------------------------------------------------------------------------------------------------------------------------------------------------------------------------------------------------------------------------------------------------------------------------------------------------------------------------------------------------------------------------------------------------------------------------------------------------------------------------------------------------------------------------------------------------------------------------------------------------------------------------------------------------------------------------------------------------------------------------------------------------------------------------------------------------------------------------------------------------------------------------------------------------|-----------------------------------------------------------------------------------------------------------------------------------------------------------------------------------------------------------------------------------------------------------------------------------------------------------------------------------------------------------------------------------------------------------------------------------------------------------------------------------------------------------------------------------------------------------------------------------------------------------------------------------------------------------------------------------------------------------------------------------------------------------------------------------------------------------------------------------------------------------------------------------------------------------------------------------------------------------------------------------------------------------------------------------------------------------------------------------------------------------------------------------------------------------------------------------------------------------------------------------------------------------------------------------------------------------------------------------------------------------------------------------------------------------------------------------------------------------------------------------------------------------------------------------------------------------------------------------------------------------------------------------------------------------------------------------------------------------------------------------------------------------------------------------------------------------------------------------------------------------------------------------------------------------------------------------------------------------------------------------------------------------------------------------------------------|

|  |  |                                                                                                                                                                                                                                                                                                                                                                                                                                                                                                                                                                                                                                                                                |                                                                                                                                                                                                                                                                                                                                                                                                                                                                                                                                                                                                                                                                                                                                                                                                                                                                                                                                                                                                                                                                                                                                                                                                                                                                                                                                                                                                                                                                                                                                                                                                                                                                                              |
|--|--|--------------------------------------------------------------------------------------------------------------------------------------------------------------------------------------------------------------------------------------------------------------------------------------------------------------------------------------------------------------------------------------------------------------------------------------------------------------------------------------------------------------------------------------------------------------------------------------------------------------------------------------------------------------------------------|----------------------------------------------------------------------------------------------------------------------------------------------------------------------------------------------------------------------------------------------------------------------------------------------------------------------------------------------------------------------------------------------------------------------------------------------------------------------------------------------------------------------------------------------------------------------------------------------------------------------------------------------------------------------------------------------------------------------------------------------------------------------------------------------------------------------------------------------------------------------------------------------------------------------------------------------------------------------------------------------------------------------------------------------------------------------------------------------------------------------------------------------------------------------------------------------------------------------------------------------------------------------------------------------------------------------------------------------------------------------------------------------------------------------------------------------------------------------------------------------------------------------------------------------------------------------------------------------------------------------------------------------------------------------------------------------|
|  |  | <p>***Nivolumab and pembrolizumab are both IgG4 antibodies**. This means that they are relatively non-inflammatory and are less likely to cause side effects such as infusion reactions.</p> <p>***Nivolumab and pembrolizumab are both approved for use in combination with other cancer treatments**, such as chemotherapy and radiation therapy.</p> <p>***Nivolumab and pembrolizumab are both considered to be breakthrough therapies** by the FDA. This means that they have shown significant improvement over existing treatments for a particular disease.</p> <p>If you have any further questions about nivolumab or pembrolizumab, please consult your doctor.</p> | <p>***Nivolumab and pembrolizumab are both IgG4 antibodies**. This means that they are relatively non-inflammatory and are less likely to cause side effects such as infusion reactions.</p> <p>***Nivolumab and pembrolizumab are both approved for use in combination with other cancer treatments**, such as chemotherapy and radiation therapy.</p> <p>***Nivolumab and pembrolizumab are both considered to be breakthrough therapies** by the FDA. This means that they have shown significant improvement over existing treatments for a particular disease.</p> <p>Here are some of the key similarities and differences between nivolumab and pembrolizumab:</p> <p><b>**Similarities:**</b></p> <ul style="list-style-type: none"> <li>* Both are checkpoint inhibitors that work by blocking the interaction between PD-1 and PD-L1.</li> <li>* Both are FDA-approved to treat a variety of cancers. <ul style="list-style-type: none"> <li>* Both are given as intravenous infusions.</li> <li>* Both have similar side effects.</li> </ul> </li> </ul> <p><b>**Differences:**</b></p> <ul style="list-style-type: none"> <li>* Nivolumab is a human monoclonal antibody, while pembrolizumab is a humanized monoclonal antibody.</li> <li>* Nivolumab is made by Bristol Myers Squibb, while pembrolizumab is made by Merck &amp; Co.</li> <li>* Nivolumab is approved for use in a slightly wider range of cancers than pembrolizumab.</li> <li>* Nivolumab is slightly more expensive than pembrolizumab.</li> </ul> <p>Ultimately, the best treatment for you will depend on your individual circumstances. Your doctor can help you decide which drug is right for you.</p> |
|--|--|--------------------------------------------------------------------------------------------------------------------------------------------------------------------------------------------------------------------------------------------------------------------------------------------------------------------------------------------------------------------------------------------------------------------------------------------------------------------------------------------------------------------------------------------------------------------------------------------------------------------------------------------------------------------------------|----------------------------------------------------------------------------------------------------------------------------------------------------------------------------------------------------------------------------------------------------------------------------------------------------------------------------------------------------------------------------------------------------------------------------------------------------------------------------------------------------------------------------------------------------------------------------------------------------------------------------------------------------------------------------------------------------------------------------------------------------------------------------------------------------------------------------------------------------------------------------------------------------------------------------------------------------------------------------------------------------------------------------------------------------------------------------------------------------------------------------------------------------------------------------------------------------------------------------------------------------------------------------------------------------------------------------------------------------------------------------------------------------------------------------------------------------------------------------------------------------------------------------------------------------------------------------------------------------------------------------------------------------------------------------------------------|

|                  |                                                                                                                                                                                                                                                                                                                                                                                                                                                                                                                                                                                                                                                                                                                                                                                                                                                                                                                                                                                                                                                                                                                                                                                                                                                                                                                                                                                                                                    |                                                                                                                                                                                                                                                                                                                                                                                                                                                                                                                                                                                                                                                                                                                                                                                                                                                                                                                                                                                                                                                                                                                                                                                                                                                                                                                                                                                                                                                                                                                                                                                                                                                                                                               |                                                                                                                                                                                                                                                                                                                                                                                                                                                                                                                                                                                                                                                                                                                                                                                                                                                                                                                                                                                                                                                                                                                                                                                                                                                                                                                                                                                                                                                                                                                                                                                                                                                                      |
|------------------|------------------------------------------------------------------------------------------------------------------------------------------------------------------------------------------------------------------------------------------------------------------------------------------------------------------------------------------------------------------------------------------------------------------------------------------------------------------------------------------------------------------------------------------------------------------------------------------------------------------------------------------------------------------------------------------------------------------------------------------------------------------------------------------------------------------------------------------------------------------------------------------------------------------------------------------------------------------------------------------------------------------------------------------------------------------------------------------------------------------------------------------------------------------------------------------------------------------------------------------------------------------------------------------------------------------------------------------------------------------------------------------------------------------------------------|---------------------------------------------------------------------------------------------------------------------------------------------------------------------------------------------------------------------------------------------------------------------------------------------------------------------------------------------------------------------------------------------------------------------------------------------------------------------------------------------------------------------------------------------------------------------------------------------------------------------------------------------------------------------------------------------------------------------------------------------------------------------------------------------------------------------------------------------------------------------------------------------------------------------------------------------------------------------------------------------------------------------------------------------------------------------------------------------------------------------------------------------------------------------------------------------------------------------------------------------------------------------------------------------------------------------------------------------------------------------------------------------------------------------------------------------------------------------------------------------------------------------------------------------------------------------------------------------------------------------------------------------------------------------------------------------------------------|----------------------------------------------------------------------------------------------------------------------------------------------------------------------------------------------------------------------------------------------------------------------------------------------------------------------------------------------------------------------------------------------------------------------------------------------------------------------------------------------------------------------------------------------------------------------------------------------------------------------------------------------------------------------------------------------------------------------------------------------------------------------------------------------------------------------------------------------------------------------------------------------------------------------------------------------------------------------------------------------------------------------------------------------------------------------------------------------------------------------------------------------------------------------------------------------------------------------------------------------------------------------------------------------------------------------------------------------------------------------------------------------------------------------------------------------------------------------------------------------------------------------------------------------------------------------------------------------------------------------------------------------------------------------|
| <p><b>Q4</b></p> | <p>Relatlimab is a <b>lymphocyte activation gene-3 (LAG-3) inhibitor</b>. LAG-3 is a protein receptor that is expressed on T cells, a type of white blood cell that plays a major role in the immune system. When LAG-3 binds to its ligand, CD80 or CD86, it sends a signal to the T cell to stop attacking the cell that is expressing CD80 or CD86. Cancer cells can often express high levels of CD80 or CD86, which can help them evade the immune system.</p> <p>Relatlimab works by blocking the binding of LAG-3 to CD80 or CD86. This allows T cells to see and attack cancer cells that would otherwise be able to evade the immune system.</p> <p>Relatlimab is currently <b>under investigation</b> for the treatment of a variety of cancers, including melanoma, lung cancer, and head and neck cancer.</p> <p>Relatlimab is a <b>monoclonal antibody</b> that is given as an intravenous infusion. It is usually given once every two weeks or once every four weeks. The most common side effects of relatlimab are fatigue, rash, diarrhea, and nausea. More serious side effects can occur, such as inflammation of the lungs or intestines.</p> <p>Relatlimab is a new cancer treatment that has shown promise in clinical trials. However, it is not yet approved by the U.S. Food and Drug Administration (FDA). If you are interested in learning more about relatlimab, you should talk to your doctor.</p> | <p>Relatlimab is a <b>monoclonal antibody</b> that is being developed by Bristol Myers Squibb as a <b>cancer immunotherapy</b>. It is a <b>LAG-3</b> (lymphocyte activation gene-3) <b>inhibitor</b>. LAG-3 is a protein receptor that is expressed on T cells, a type of white blood cell that plays a major role in the immune system. When LAG-3 binds to its ligand, CD80 or CD86, it sends a signal to the T cell to stop attacking the cell that is expressing CD80 or CD86. Cancer cells can often express high levels of CD80 or CD86, which can help them evade the immune system.</p> <p>Relatlimab works by blocking the binding of LAG-3 to CD80 or CD86. This allows T cells to see and attack cancer cells that would otherwise be able to evade the immune system.</p> <p>Relatlimab is currently <b>under investigation</b> for the treatment of a variety of cancers, including:</p> <ul style="list-style-type: none"> <li><b>Melanoma</b></li> <li><b>Lung cancer</b></li> <li><b>Head and neck cancer</b></li> <li><b>Kidney cancer</b></li> <li><b>Urothelial cancer</b></li> </ul> <p>Relatlimab has been <b>shown to be effective in clinical trials</b>. In a phase 2 trial, relatlimab was shown to improve survival in patients with advanced melanoma who had previously received other treatments. In a phase 1 trial, relatlimab was shown to be well-tolerated and effective in patients with advanced lung cancer.</p> <p>Relatlimab is not yet approved by the U.S. Food and Drug Administration (FDA). However, it is expected to be submitted for approval in the near future. If you are interested in learning more about relatlimab, you should talk to your doctor.</p> | <p>Relatlimab (Opdualag) is a <b>monoclonal antibody</b> that is being developed by Bristol Myers Squibb as a <b>cancer immunotherapy</b>. It is a <b>Lymphocyte activation gene-3 (LAG-3) inhibitor</b>. LAG-3 is a protein receptor that is expressed on T cells, a type of white blood cell that plays a major role in the immune system. When LAG-3 binds to its ligand, CD80 or CD86, it sends a signal to the T cell to stop attacking the cell that is expressing CD80 or CD86. Cancer cells can often express high levels of CD80 or CD86, which can help them evade the immune system.</p> <p>Relatlimab works by blocking the binding of LAG-3 to CD80 or CD86. This allows T cells to see and attack cancer cells that would otherwise be able to evade the immune system.</p> <p>Relatlimab is currently <b>approved by the U.S. Food and Drug Administration (FDA)</b> for the treatment of <b>unresectable or metastatic melanoma</b> in adult patients who have received prior therapy.</p> <p>Relatlimab is given as an intravenous infusion. It is usually given once every two weeks or once every four weeks. The most common side effects of relatlimab are fatigue, rash, diarrhea, and nausea. More serious side effects can occur, such as inflammation of the lungs or intestines.</p> <p>Relatlimab is a new cancer treatment that has shown promise in clinical trials. However, it is important to note that it is not a cure for cancer. It can help to prolong the lives of patients with advanced cancer, but it is not always effective. If you are interested in learning more about relatlimab, you should talk to your doctor.</p> |
|------------------|------------------------------------------------------------------------------------------------------------------------------------------------------------------------------------------------------------------------------------------------------------------------------------------------------------------------------------------------------------------------------------------------------------------------------------------------------------------------------------------------------------------------------------------------------------------------------------------------------------------------------------------------------------------------------------------------------------------------------------------------------------------------------------------------------------------------------------------------------------------------------------------------------------------------------------------------------------------------------------------------------------------------------------------------------------------------------------------------------------------------------------------------------------------------------------------------------------------------------------------------------------------------------------------------------------------------------------------------------------------------------------------------------------------------------------|---------------------------------------------------------------------------------------------------------------------------------------------------------------------------------------------------------------------------------------------------------------------------------------------------------------------------------------------------------------------------------------------------------------------------------------------------------------------------------------------------------------------------------------------------------------------------------------------------------------------------------------------------------------------------------------------------------------------------------------------------------------------------------------------------------------------------------------------------------------------------------------------------------------------------------------------------------------------------------------------------------------------------------------------------------------------------------------------------------------------------------------------------------------------------------------------------------------------------------------------------------------------------------------------------------------------------------------------------------------------------------------------------------------------------------------------------------------------------------------------------------------------------------------------------------------------------------------------------------------------------------------------------------------------------------------------------------------|----------------------------------------------------------------------------------------------------------------------------------------------------------------------------------------------------------------------------------------------------------------------------------------------------------------------------------------------------------------------------------------------------------------------------------------------------------------------------------------------------------------------------------------------------------------------------------------------------------------------------------------------------------------------------------------------------------------------------------------------------------------------------------------------------------------------------------------------------------------------------------------------------------------------------------------------------------------------------------------------------------------------------------------------------------------------------------------------------------------------------------------------------------------------------------------------------------------------------------------------------------------------------------------------------------------------------------------------------------------------------------------------------------------------------------------------------------------------------------------------------------------------------------------------------------------------------------------------------------------------------------------------------------------------|



|           |                                                                                                                                                                                                                                                                                                                                                                                                                                                                                                                                                                                                                                                                                                                                                                                                                                                                                                                                                                                                                                                                                                                                                                                                                                                                                                                                                                                                                                                                                                                                                                                                                                                                                                                                                                                                                                                                                                                                                                                                             |                                                                |                                         |
|-----------|-------------------------------------------------------------------------------------------------------------------------------------------------------------------------------------------------------------------------------------------------------------------------------------------------------------------------------------------------------------------------------------------------------------------------------------------------------------------------------------------------------------------------------------------------------------------------------------------------------------------------------------------------------------------------------------------------------------------------------------------------------------------------------------------------------------------------------------------------------------------------------------------------------------------------------------------------------------------------------------------------------------------------------------------------------------------------------------------------------------------------------------------------------------------------------------------------------------------------------------------------------------------------------------------------------------------------------------------------------------------------------------------------------------------------------------------------------------------------------------------------------------------------------------------------------------------------------------------------------------------------------------------------------------------------------------------------------------------------------------------------------------------------------------------------------------------------------------------------------------------------------------------------------------------------------------------------------------------------------------------------------------|----------------------------------------------------------------|-----------------------------------------|
| <p>Q5</p> | <p>Gardasil is a <b>human papillomavirus (HPV)</b> vaccine. It is designed to protect against <b>nine types of HPV</b> that can cause cervical, vaginal, vulvar, penile, anal, and oropharyngeal cancer. Gardasil is also effective in preventing genital warts.</p> <p>The nine HPV types that Gardasil targets are:</p> <ul style="list-style-type: none"> <li><b>HPV 6</b></li> <li><b>HPV 11</b></li> <li><b>HPV 16</b></li> <li><b>HPV 18</b></li> <li><b>HPV 31</b></li> <li><b>HPV 33</b></li> <li><b>HPV 45</b></li> <li><b>HPV 52</b></li> <li><b>HPV 58</b></li> </ul> <p>HPV is a very common virus. Most people will be infected with HPV at some point in their lives. However, most HPV infections go away on their own and do not cause any health problems. However, some types of HPV can cause cancer.</p> <p>Gardasil works by exposing the body to weakened forms of the HPV viruses that it targets. This helps the body's immune system to develop immunity to the viruses. If a person is later exposed to one of the HPV types that Gardasil targets, their body will be able to fight off the infection and prevent it from causing cancer.</p> <p>Gardasil is given as a series of three shots. The first shot is given at the doctor's office. The second shot is given two months after the first shot. The third shot is given six months after the first shot.</p> <p>Gardasil is safe and effective. The most common side effects of Gardasil are mild and go away on their own. These side effects may include pain, redness, and swelling at the injection site. Some people may also experience fever, headache, muscle pain, and fatigue.</p> <p>Gardasil is recommended for <b>girls and boys</b> aged 9-14 years old. It can also be given to <b>younger children</b> and <b>adults</b>. Gardasil is not a cure for HPV infection or cancer. It is important to note that Gardasil does not protect against all types of HPV or all types of HPV-related diseases.</p> | <p>Gardasil targets 9 types of human papillomavirus (HPV).</p> | <p>Gardasil targets 9 types of HPV.</p> |
|-----------|-------------------------------------------------------------------------------------------------------------------------------------------------------------------------------------------------------------------------------------------------------------------------------------------------------------------------------------------------------------------------------------------------------------------------------------------------------------------------------------------------------------------------------------------------------------------------------------------------------------------------------------------------------------------------------------------------------------------------------------------------------------------------------------------------------------------------------------------------------------------------------------------------------------------------------------------------------------------------------------------------------------------------------------------------------------------------------------------------------------------------------------------------------------------------------------------------------------------------------------------------------------------------------------------------------------------------------------------------------------------------------------------------------------------------------------------------------------------------------------------------------------------------------------------------------------------------------------------------------------------------------------------------------------------------------------------------------------------------------------------------------------------------------------------------------------------------------------------------------------------------------------------------------------------------------------------------------------------------------------------------------------|----------------------------------------------------------------|-----------------------------------------|

|           |                                                                                                                                                                                                                                                                                                                                                                                                                                                                                                                                                                                                                                                                                                                                                                                                                                                                                                                                                                                                                                                                                                                                                                                                                                                                                                                                                                                                                                                                                                                                                                                                                                                                                                                                                                                                                                                                                                                                                                                                                                                                                                                                                                                                                                                             |                                                                                                                                                                                                                                                                                                                                                                                                                                                                                                                                                                                                                                                                                                                                                                                                                                                                                                                                                                                                                                                                                                                                                                                                                                                                                                                                                                                                                                                                                                                                                                                                                                                                                                                                                                                                                                                                                                                                                                                                                                                                                                                                                                                                                                                                                                                    |                                                                                                                                                                                                                                                                                                                                                                                                                                                                                                                                                                                                                                                                                                                                                                                                                                                                                                                                                                                                                                                                                                                                                                                                                                                                                                                                                                                                                                                                                                                                                                                                                                                                                                                                                                                                                                                                                                                                                                                                                                                                                                                                                                                                                                                                                                                    |
|-----------|-------------------------------------------------------------------------------------------------------------------------------------------------------------------------------------------------------------------------------------------------------------------------------------------------------------------------------------------------------------------------------------------------------------------------------------------------------------------------------------------------------------------------------------------------------------------------------------------------------------------------------------------------------------------------------------------------------------------------------------------------------------------------------------------------------------------------------------------------------------------------------------------------------------------------------------------------------------------------------------------------------------------------------------------------------------------------------------------------------------------------------------------------------------------------------------------------------------------------------------------------------------------------------------------------------------------------------------------------------------------------------------------------------------------------------------------------------------------------------------------------------------------------------------------------------------------------------------------------------------------------------------------------------------------------------------------------------------------------------------------------------------------------------------------------------------------------------------------------------------------------------------------------------------------------------------------------------------------------------------------------------------------------------------------------------------------------------------------------------------------------------------------------------------------------------------------------------------------------------------------------------------|--------------------------------------------------------------------------------------------------------------------------------------------------------------------------------------------------------------------------------------------------------------------------------------------------------------------------------------------------------------------------------------------------------------------------------------------------------------------------------------------------------------------------------------------------------------------------------------------------------------------------------------------------------------------------------------------------------------------------------------------------------------------------------------------------------------------------------------------------------------------------------------------------------------------------------------------------------------------------------------------------------------------------------------------------------------------------------------------------------------------------------------------------------------------------------------------------------------------------------------------------------------------------------------------------------------------------------------------------------------------------------------------------------------------------------------------------------------------------------------------------------------------------------------------------------------------------------------------------------------------------------------------------------------------------------------------------------------------------------------------------------------------------------------------------------------------------------------------------------------------------------------------------------------------------------------------------------------------------------------------------------------------------------------------------------------------------------------------------------------------------------------------------------------------------------------------------------------------------------------------------------------------------------------------------------------------|--------------------------------------------------------------------------------------------------------------------------------------------------------------------------------------------------------------------------------------------------------------------------------------------------------------------------------------------------------------------------------------------------------------------------------------------------------------------------------------------------------------------------------------------------------------------------------------------------------------------------------------------------------------------------------------------------------------------------------------------------------------------------------------------------------------------------------------------------------------------------------------------------------------------------------------------------------------------------------------------------------------------------------------------------------------------------------------------------------------------------------------------------------------------------------------------------------------------------------------------------------------------------------------------------------------------------------------------------------------------------------------------------------------------------------------------------------------------------------------------------------------------------------------------------------------------------------------------------------------------------------------------------------------------------------------------------------------------------------------------------------------------------------------------------------------------------------------------------------------------------------------------------------------------------------------------------------------------------------------------------------------------------------------------------------------------------------------------------------------------------------------------------------------------------------------------------------------------------------------------------------------------------------------------------------------------|
| <p>Q6</p> | <p>Yes, cancer can damage the immune system. This is because cancer cells can produce proteins that interfere with the function of immune cells. For example, cancer cells can produce proteins that suppress the activity of T cells, which are a type of white blood cell that plays a key role in the immune system. Cancer cells can also produce proteins that make it difficult for immune cells to recognize and attack cancer cells.</p> <p>As a result of this damage, people with cancer are more likely to get infections. They are also more likely to have problems with their immune system responding to other diseases, such as autoimmune diseases.</p> <p>There are a number of ways that cancer can damage the immune system. Some of these ways include:</p> <ul style="list-style-type: none"> <li>* **Production of proteins that interfere with the function of immune cells***. As mentioned above, cancer cells can produce proteins that suppress the activity of T cells, which are a type of white blood cell that plays a key role in the immune system. Cancer cells can also produce proteins that make it difficult for immune cells to recognize and attack cancer cells.</li> <li>* **Invasion of the immune system***. Cancer cells can invade the immune system, which can interfere with the ability of the immune system to fight cancer.</li> <li>* **Release of toxins***. Cancer cells can release toxins that can damage immune cells.</li> <li>* **Stress***. Cancer can cause stress, which can also damage the immune system.</li> </ul> <p>There are a number of things that can be done to help protect the immune system from cancer damage. These include:</p> <ul style="list-style-type: none"> <li>* **Getting regular exercise***. Exercise can help to boost the immune system.</li> <li>* **Eating a healthy diet***. A healthy diet can help to provide the body with the nutrients it needs to support a healthy immune system.</li> <li>* **Getting enough sleep***. Sleep is important for immune system function.</li> <li>* **Managing stress***. Stress can damage the immune system, so it is important to find ways to manage stress, such as relaxation techniques or exercise.</li> </ul> | <p>Yes, cancer can damage the immune system.</p> <p>The immune system is a complex network of cells and proteins that helps the body fight infection and disease. Cancer cells can interfere with the immune system in a number of ways, including:</p> <ul style="list-style-type: none"> <li>* **Producing proteins that suppress the activity of immune cells***. Cancer cells can produce proteins that suppress the activity of immune cells, such as T cells. This can make it difficult for the immune system to fight cancer cells.</li> <li>* **Hiding from the immune system***. Cancer cells can hide from the immune system by mimicking healthy cells or by producing proteins that make them invisible to the immune system.</li> <li>* **Injuring immune cells***. Cancer cells can injure immune cells by releasing toxins or by physically damaging them.</li> <li>* **Depleting immune cells***. Cancer can cause the body to produce fewer immune cells, making it more difficult for the immune system to fight cancer cells.</li> </ul> <p>As a result of these mechanisms, people with cancer are often more susceptible to infections. They may also have a harder time fighting off other diseases, such as autoimmune diseases.</p> <p>There are a number of things that can be done to help protect the immune system from cancer damage, including:</p> <ul style="list-style-type: none"> <li>* **Getting regular exercise***. Exercise can help to boost the immune system.</li> <li>* **Eating a healthy diet***. A healthy diet can help to provide the body with the nutrients it needs to support a healthy immune system.</li> <li>* **Getting enough sleep***. Sleep is important for immune system function.</li> <li>* **Managing stress***. Stress can damage the immune system, so it is important to find ways to manage stress, such as relaxation techniques or exercise.</li> <li>* **Getting vaccinated***. Vaccines can help to protect the body from infections, which can put a strain on the immune system.</li> <li>* **Taking supplements***. Some supplements, such as vitamin D and zinc, may help to boost the immune system. However, it is important to talk to your doctor before taking any supplements, as some may interact with medications</li> </ul> | <p>Yes, cancer can damage the immune system.</p> <p>The immune system is a complex network of cells and proteins that helps the body fight infection and disease. Cancer cells can interfere with the immune system in a number of ways, including:</p> <ul style="list-style-type: none"> <li>* **Producing proteins that suppress the activity of immune cells***. Cancer cells can produce proteins that suppress the activity of immune cells, such as T cells. This can make it difficult for the immune system to fight cancer cells.</li> <li>* **Hiding from the immune system***. Cancer cells can hide from the immune system by mimicking healthy cells or by producing proteins that make them invisible to the immune system.</li> <li>* **Injuring immune cells***. Cancer cells can injure immune cells by releasing toxins or by physically damaging them.</li> <li>* **Depleting immune cells***. Cancer can cause the body to produce fewer immune cells, making it more difficult for the immune system to fight cancer cells.</li> </ul> <p>As a result of these mechanisms, people with cancer are often more susceptible to infections. They may also have a harder time fighting off other diseases, such as autoimmune diseases.</p> <p>There are a number of things that can be done to help protect the immune system from cancer damage, including:</p> <ul style="list-style-type: none"> <li>* **Getting regular exercise***. Exercise can help to boost the immune system.</li> <li>* **Eating a healthy diet***. A healthy diet can help to provide the body with the nutrients it needs to support a healthy immune system.</li> <li>* **Getting enough sleep***. Sleep is important for immune system function.</li> <li>* **Managing stress***. Stress can damage the immune system, so it is important to find ways to manage stress, such as relaxation techniques or exercise.</li> <li>* **Getting vaccinated***. Vaccines can help to protect the body from infections, which can put a strain on the immune system.</li> <li>* **Taking supplements***. Some supplements, such as vitamin D and zinc, may help to boost the immune system. However, it is important to talk to your doctor before taking any supplements, as some may interact with medications</li> </ul> |
|-----------|-------------------------------------------------------------------------------------------------------------------------------------------------------------------------------------------------------------------------------------------------------------------------------------------------------------------------------------------------------------------------------------------------------------------------------------------------------------------------------------------------------------------------------------------------------------------------------------------------------------------------------------------------------------------------------------------------------------------------------------------------------------------------------------------------------------------------------------------------------------------------------------------------------------------------------------------------------------------------------------------------------------------------------------------------------------------------------------------------------------------------------------------------------------------------------------------------------------------------------------------------------------------------------------------------------------------------------------------------------------------------------------------------------------------------------------------------------------------------------------------------------------------------------------------------------------------------------------------------------------------------------------------------------------------------------------------------------------------------------------------------------------------------------------------------------------------------------------------------------------------------------------------------------------------------------------------------------------------------------------------------------------------------------------------------------------------------------------------------------------------------------------------------------------------------------------------------------------------------------------------------------------|--------------------------------------------------------------------------------------------------------------------------------------------------------------------------------------------------------------------------------------------------------------------------------------------------------------------------------------------------------------------------------------------------------------------------------------------------------------------------------------------------------------------------------------------------------------------------------------------------------------------------------------------------------------------------------------------------------------------------------------------------------------------------------------------------------------------------------------------------------------------------------------------------------------------------------------------------------------------------------------------------------------------------------------------------------------------------------------------------------------------------------------------------------------------------------------------------------------------------------------------------------------------------------------------------------------------------------------------------------------------------------------------------------------------------------------------------------------------------------------------------------------------------------------------------------------------------------------------------------------------------------------------------------------------------------------------------------------------------------------------------------------------------------------------------------------------------------------------------------------------------------------------------------------------------------------------------------------------------------------------------------------------------------------------------------------------------------------------------------------------------------------------------------------------------------------------------------------------------------------------------------------------------------------------------------------------|--------------------------------------------------------------------------------------------------------------------------------------------------------------------------------------------------------------------------------------------------------------------------------------------------------------------------------------------------------------------------------------------------------------------------------------------------------------------------------------------------------------------------------------------------------------------------------------------------------------------------------------------------------------------------------------------------------------------------------------------------------------------------------------------------------------------------------------------------------------------------------------------------------------------------------------------------------------------------------------------------------------------------------------------------------------------------------------------------------------------------------------------------------------------------------------------------------------------------------------------------------------------------------------------------------------------------------------------------------------------------------------------------------------------------------------------------------------------------------------------------------------------------------------------------------------------------------------------------------------------------------------------------------------------------------------------------------------------------------------------------------------------------------------------------------------------------------------------------------------------------------------------------------------------------------------------------------------------------------------------------------------------------------------------------------------------------------------------------------------------------------------------------------------------------------------------------------------------------------------------------------------------------------------------------------------------|

|  |                                                                                                                                                                                                                                                                                                                                                                                                                                                                                                                                                                  |                                                                                                                                                                                                                                          |                                                                                                                                                                                                                                          |
|--|------------------------------------------------------------------------------------------------------------------------------------------------------------------------------------------------------------------------------------------------------------------------------------------------------------------------------------------------------------------------------------------------------------------------------------------------------------------------------------------------------------------------------------------------------------------|------------------------------------------------------------------------------------------------------------------------------------------------------------------------------------------------------------------------------------------|------------------------------------------------------------------------------------------------------------------------------------------------------------------------------------------------------------------------------------------|
|  | <p><b>***Getting vaccinated**</b>. Vaccines can help to protect the body from infections, which can put a strain on the immune system.</p> <p><b>***Taking supplements**</b>. Some supplements, such as vitamin D and zinc, may help to boost the immune system. However, it is important to talk to your doctor before taking any supplements, as some may interact with medications you are taking.</p> <p>If you have cancer, it is important to work with your doctor to monitor your immune system and to take steps to protect it from further damage.</p> | <p>you are taking.</p> <p><b>***Treating cancer**</b>. Cancer treatment can damage the immune system, so it is important to work with your doctor to monitor your immune system and to take steps to protect it from further damage.</p> | <p>you are taking.</p> <p><b>***Treating cancer.**</b> Cancer treatment can damage the immune system, so it is important to work with your doctor to monitor your immune system and to take steps to protect it from further damage.</p> |
|--|------------------------------------------------------------------------------------------------------------------------------------------------------------------------------------------------------------------------------------------------------------------------------------------------------------------------------------------------------------------------------------------------------------------------------------------------------------------------------------------------------------------------------------------------------------------|------------------------------------------------------------------------------------------------------------------------------------------------------------------------------------------------------------------------------------------|------------------------------------------------------------------------------------------------------------------------------------------------------------------------------------------------------------------------------------------|

|                  |                                                                                                                                                                                                                                                                                                                                                                                                                                                                                                                                                                                                                                                                                                                                                                                                                                                                                                                                                                                                                                                                                                                                                                                                                                                                                                                                                                                                                                                                                                                                                                                                                                                                                                                                                                                                                                                                                    |                                                                                                                                                                                                                                                                                                                                                                                                                                                                                                                                                                                                                                                                                                                                                                                                                                                                                                                                                                                                                                                                                                                                                                                                                                                                                                                                                                                                                                                                                                                                                                                                                                                                                                                                                                                                                                                                                                                                                                                                                                                                                                                                                                                                                                                                                                   |                                                                                                                                                                                                                                                                                                                                                                                                                                                                                                                                                                                                                                                                                                                                                                                                                                                                                                                                                                                                                                                                                                                                                                                                                                                                                                                                                                                                                                                                                                                                                                                                                                                                                                                                                                                                                                                                                                                                                                                                                                 |
|------------------|------------------------------------------------------------------------------------------------------------------------------------------------------------------------------------------------------------------------------------------------------------------------------------------------------------------------------------------------------------------------------------------------------------------------------------------------------------------------------------------------------------------------------------------------------------------------------------------------------------------------------------------------------------------------------------------------------------------------------------------------------------------------------------------------------------------------------------------------------------------------------------------------------------------------------------------------------------------------------------------------------------------------------------------------------------------------------------------------------------------------------------------------------------------------------------------------------------------------------------------------------------------------------------------------------------------------------------------------------------------------------------------------------------------------------------------------------------------------------------------------------------------------------------------------------------------------------------------------------------------------------------------------------------------------------------------------------------------------------------------------------------------------------------------------------------------------------------------------------------------------------------|---------------------------------------------------------------------------------------------------------------------------------------------------------------------------------------------------------------------------------------------------------------------------------------------------------------------------------------------------------------------------------------------------------------------------------------------------------------------------------------------------------------------------------------------------------------------------------------------------------------------------------------------------------------------------------------------------------------------------------------------------------------------------------------------------------------------------------------------------------------------------------------------------------------------------------------------------------------------------------------------------------------------------------------------------------------------------------------------------------------------------------------------------------------------------------------------------------------------------------------------------------------------------------------------------------------------------------------------------------------------------------------------------------------------------------------------------------------------------------------------------------------------------------------------------------------------------------------------------------------------------------------------------------------------------------------------------------------------------------------------------------------------------------------------------------------------------------------------------------------------------------------------------------------------------------------------------------------------------------------------------------------------------------------------------------------------------------------------------------------------------------------------------------------------------------------------------------------------------------------------------------------------------------------------------|---------------------------------------------------------------------------------------------------------------------------------------------------------------------------------------------------------------------------------------------------------------------------------------------------------------------------------------------------------------------------------------------------------------------------------------------------------------------------------------------------------------------------------------------------------------------------------------------------------------------------------------------------------------------------------------------------------------------------------------------------------------------------------------------------------------------------------------------------------------------------------------------------------------------------------------------------------------------------------------------------------------------------------------------------------------------------------------------------------------------------------------------------------------------------------------------------------------------------------------------------------------------------------------------------------------------------------------------------------------------------------------------------------------------------------------------------------------------------------------------------------------------------------------------------------------------------------------------------------------------------------------------------------------------------------------------------------------------------------------------------------------------------------------------------------------------------------------------------------------------------------------------------------------------------------------------------------------------------------------------------------------------------------|
| <p><b>Q7</b></p> | <p><b>**Anti-PD-1**</b> and <b>**anti-PD-L1**</b> are types of <b>**immune checkpoint inhibitors**</b>. They work by blocking the interaction between <b>**programmed cell death protein 1 (PD-1)**</b> and its <b>**ligand, programmed death-ligand 1 (PD-L1)**</b>. This interaction normally helps to suppress the immune system's response to cancer cells. By blocking this interaction, anti-PD-1 and anti-PD-L1 can help the immune system to recognize and attack cancer cells.</p> <p><b>**PD-1**</b> is a protein receptor that is expressed on T cells, a type of white blood cell that plays a major role in the immune system. <b>**PD-L1**</b> is a protein that is expressed on some cancer cells. When PD-1 binds to PD-L1, it sends a signal to the T cell to stop attacking the cell that is expressing PD-L1. Cancer cells can often express high levels of PD-L1, which can help them evade the immune system.</p> <p><b>**Anti-PD-1**</b> drugs work by blocking the interaction between PD-1 and PD-L1. This allows T cells to see and attack cancer cells that would otherwise be able to evade the immune system. <b>**Anti-PD-L1**</b> drugs work in a similar way, but they block the interaction between PD-L1 and a different protein receptor called <b>**B7-H1**</b>.</p> <p>Both anti-PD-1 and anti-PD-L1 drugs have been shown to be effective in treating a variety of cancers, including melanoma, lung cancer, and head and neck cancer. However, they are not without side effects. Some common side effects of anti-PD-1 and anti-PD-L1 drugs include fatigue, rash, diarrhea, and nausea. More serious side effects can occur, such as inflammation of the lungs or intestines.</p> <p>Ultimately, the best treatment for you will depend on your individual circumstances. Your doctor can help you decide which drug is right for you.</p> | <p>Here are some of the key similarities and differences between anti-PD-1 and anti-PD-L1 treatment:</p> <p><b>**Similarities:**</b></p> <ul style="list-style-type: none"> <li>* Both anti-PD-1 and anti-PD-L1 are <b>**immune checkpoint inhibitors**</b>. This means that they work by blocking the interaction between programmed cell death protein 1 (PD-1) and its ligand, programmed death-ligand 1 (PD-L1).</li> <li>* Both anti-PD-1 and anti-PD-L1 are <b>**FDA-approved**</b> to treat a variety of cancers, including melanoma, lung cancer, and head and neck cancer.</li> <li>* Both anti-PD-1 and anti-PD-L1 are given as <b>**intravenous infusions**</b>.</li> <li>* Both anti-PD-1 and anti-PD-L1 have similar <b>**side effects**</b>, such as fatigue, rash, diarrhea, and nausea. More serious side effects can occur, such as inflammation of the lungs or intestines.</li> </ul> <p><b>**Differences:**</b></p> <ul style="list-style-type: none"> <li>* <b>**PD-1**</b> is a protein receptor that is expressed on T cells, a type of white blood cell that plays a major role in the immune system. <b>**PD-L1**</b> is a protein that is expressed on some cancer cells. When PD-1 binds to PD-L1, it sends a signal to the T cell to stop attacking the cell that is expressing PD-L1. Cancer cells can often express high levels of PD-L1, which can help them evade the immune system.</li> <li>* <b>**Anti-PD-1 drugs**</b> work by blocking the interaction between PD-1 and PD-L1. This allows T cells to see and attack cancer cells that would otherwise be able to evade the immune system.</li> <li>* <b>**Anti-PD-L1 drugs**</b> work in a similar way, but they block the interaction between PD-L1 and a different protein receptor called <b>**B7-H1**</b>.</li> <li>* <b>**Anti-PD-1 drugs**</b> are typically approved for patients with cancer that has metastasized (spread to other parts of the body). <b>**Anti-PD-L1 drugs**</b> can also be approved for patients with earlier-stage cancer, but this is less common.</li> <li>* <b>**Anti-PD-1 drugs**</b> are typically given as a single infusion every two or four weeks. <b>**Anti-PD-L1 drugs**</b> can be given as a single infusion every two, three, or four weeks, or as a</li> </ul> | <p>Anti-PD-1 and anti-PD-L1 therapies are both types of immune checkpoint inhibitors. They work by blocking the interaction between programmed cell death protein 1 (PD-1) and its ligand, programmed death-ligand 1 (PD-L1).</p> <ul style="list-style-type: none"> <li>* PD-1 is a protein receptor that is expressed on T cells, a type of white blood cell that plays a major role in the immune system.</li> <li>* PD-L1 is a protein that is expressed on some cancer cells. When PD-1 binds to PD-L1, it sends a signal to the T cell to stop attacking the cell that is expressing PD-L1. Cancer cells can often express high levels of PD-L1, which can help them evade the immune system.</li> </ul> <p>Here are some of the key differences between anti-PD-1 and anti-PD-L1 therapies:</p> <ul style="list-style-type: none"> <li>* <b>**Anti-PD-1 therapies**</b> work by blocking the interaction between PD-1 and PD-L1. This allows T cells to see and attack cancer cells that would otherwise be able to evade the immune system.</li> <li>* <b>**Anti-PD-L1 therapies**</b> work in a similar way, but they block the interaction between PD-L1 and a different protein receptor called <b>**B7-H1**</b>.</li> <li>* <b>**Anti-PD-1 therapies**</b> are typically approved for patients with cancer that has metastasized (spread to other parts of the body). <b>**Anti-PD-L1 therapies**</b> can also be approved for patients with earlier-stage cancer, but this is less common.</li> <li>* <b>**Anti-PD-1 therapies**</b> are typically given as a single infusion every two or four weeks. <b>**Anti-PD-L1 therapies**</b> can be given as a single infusion every two, three, or four weeks, or as a combination of two or more infusions.</li> </ul> <p>Ultimately, the best treatment for you will depend on your individual circumstances. Your doctor can help you decide which drug is right for you.</p> <p>Here are some of the common side effects of anti-PD-1 and anti-PD-L1 therapies:</p> |
|------------------|------------------------------------------------------------------------------------------------------------------------------------------------------------------------------------------------------------------------------------------------------------------------------------------------------------------------------------------------------------------------------------------------------------------------------------------------------------------------------------------------------------------------------------------------------------------------------------------------------------------------------------------------------------------------------------------------------------------------------------------------------------------------------------------------------------------------------------------------------------------------------------------------------------------------------------------------------------------------------------------------------------------------------------------------------------------------------------------------------------------------------------------------------------------------------------------------------------------------------------------------------------------------------------------------------------------------------------------------------------------------------------------------------------------------------------------------------------------------------------------------------------------------------------------------------------------------------------------------------------------------------------------------------------------------------------------------------------------------------------------------------------------------------------------------------------------------------------------------------------------------------------|---------------------------------------------------------------------------------------------------------------------------------------------------------------------------------------------------------------------------------------------------------------------------------------------------------------------------------------------------------------------------------------------------------------------------------------------------------------------------------------------------------------------------------------------------------------------------------------------------------------------------------------------------------------------------------------------------------------------------------------------------------------------------------------------------------------------------------------------------------------------------------------------------------------------------------------------------------------------------------------------------------------------------------------------------------------------------------------------------------------------------------------------------------------------------------------------------------------------------------------------------------------------------------------------------------------------------------------------------------------------------------------------------------------------------------------------------------------------------------------------------------------------------------------------------------------------------------------------------------------------------------------------------------------------------------------------------------------------------------------------------------------------------------------------------------------------------------------------------------------------------------------------------------------------------------------------------------------------------------------------------------------------------------------------------------------------------------------------------------------------------------------------------------------------------------------------------------------------------------------------------------------------------------------------------|---------------------------------------------------------------------------------------------------------------------------------------------------------------------------------------------------------------------------------------------------------------------------------------------------------------------------------------------------------------------------------------------------------------------------------------------------------------------------------------------------------------------------------------------------------------------------------------------------------------------------------------------------------------------------------------------------------------------------------------------------------------------------------------------------------------------------------------------------------------------------------------------------------------------------------------------------------------------------------------------------------------------------------------------------------------------------------------------------------------------------------------------------------------------------------------------------------------------------------------------------------------------------------------------------------------------------------------------------------------------------------------------------------------------------------------------------------------------------------------------------------------------------------------------------------------------------------------------------------------------------------------------------------------------------------------------------------------------------------------------------------------------------------------------------------------------------------------------------------------------------------------------------------------------------------------------------------------------------------------------------------------------------------|

|  |  |                                                                                                                                                                                                       |                                                                                                                                                                                                                                                                                                                                                                                                                    |
|--|--|-------------------------------------------------------------------------------------------------------------------------------------------------------------------------------------------------------|--------------------------------------------------------------------------------------------------------------------------------------------------------------------------------------------------------------------------------------------------------------------------------------------------------------------------------------------------------------------------------------------------------------------|
|  |  | <p>combination of two or more infusions.</p> <p>Ultimately, the best treatment for you will depend on your individual circumstances. Your doctor can help you decide which drug is right for you.</p> | <ul style="list-style-type: none"><li>* Fatigue</li><li>* Rash</li><li>* Diarrhea</li><li>* Nausea</li><li>* Pain</li><li>* Infusion reactions</li><li>* Inflammation of the lungs or intestines</li><li>* Serious side effects, such as cancer progression, new cancers, and immune-related adverse events, can occur.</li></ul> <p>If you are experiencing any side effects, be sure to talk to your doctor.</p> |
|--|--|-------------------------------------------------------------------------------------------------------------------------------------------------------------------------------------------------------|--------------------------------------------------------------------------------------------------------------------------------------------------------------------------------------------------------------------------------------------------------------------------------------------------------------------------------------------------------------------------------------------------------------------|

|           |                                                                                                                                                                                                                                                                                                                                                                                                                                                                                                                                                                                                                                                                                                                                                                                                                                                                                                                                                                                                                                                                                                                                                                                                                                                                                                                                                                                                                                                                                                                                                                                                                                                                                                                                                                                                                                                                                                                                                                                                                                                                                                                                                                                                                                                                                                                                                                                                                                         |                                                                                                                                                                                                                                                                                                                                                                                                                                                                                                                                                                                                                                                                                                                                                                                                                                                                                                                                                                                                                                                                                                                                                                                                                                                                                                                                                                                                                                                                                                                                                                                                                                                                                                                                                                                                                                                                                                                                                                                                                                                                                                                                                                                                                                                                                                                                                                                                                                                                                                                    |                                                                                                                                                                                                                                                                                                                                                                                                                                                                                                                                                                                                                                                                                                                                                                                                                                                                                                                                                                                                                                                                                                                                                                                                                                                                                                                                                                                                                                                                                                                                                                                                                                                                                                                                                                                                                                                                                                                                                                                                                                                                                                                                                                                                                                                                                                                                                                                                                                                                                                  |
|-----------|-----------------------------------------------------------------------------------------------------------------------------------------------------------------------------------------------------------------------------------------------------------------------------------------------------------------------------------------------------------------------------------------------------------------------------------------------------------------------------------------------------------------------------------------------------------------------------------------------------------------------------------------------------------------------------------------------------------------------------------------------------------------------------------------------------------------------------------------------------------------------------------------------------------------------------------------------------------------------------------------------------------------------------------------------------------------------------------------------------------------------------------------------------------------------------------------------------------------------------------------------------------------------------------------------------------------------------------------------------------------------------------------------------------------------------------------------------------------------------------------------------------------------------------------------------------------------------------------------------------------------------------------------------------------------------------------------------------------------------------------------------------------------------------------------------------------------------------------------------------------------------------------------------------------------------------------------------------------------------------------------------------------------------------------------------------------------------------------------------------------------------------------------------------------------------------------------------------------------------------------------------------------------------------------------------------------------------------------------------------------------------------------------------------------------------------------|--------------------------------------------------------------------------------------------------------------------------------------------------------------------------------------------------------------------------------------------------------------------------------------------------------------------------------------------------------------------------------------------------------------------------------------------------------------------------------------------------------------------------------------------------------------------------------------------------------------------------------------------------------------------------------------------------------------------------------------------------------------------------------------------------------------------------------------------------------------------------------------------------------------------------------------------------------------------------------------------------------------------------------------------------------------------------------------------------------------------------------------------------------------------------------------------------------------------------------------------------------------------------------------------------------------------------------------------------------------------------------------------------------------------------------------------------------------------------------------------------------------------------------------------------------------------------------------------------------------------------------------------------------------------------------------------------------------------------------------------------------------------------------------------------------------------------------------------------------------------------------------------------------------------------------------------------------------------------------------------------------------------------------------------------------------------------------------------------------------------------------------------------------------------------------------------------------------------------------------------------------------------------------------------------------------------------------------------------------------------------------------------------------------------------------------------------------------------------------------------------------------------|--------------------------------------------------------------------------------------------------------------------------------------------------------------------------------------------------------------------------------------------------------------------------------------------------------------------------------------------------------------------------------------------------------------------------------------------------------------------------------------------------------------------------------------------------------------------------------------------------------------------------------------------------------------------------------------------------------------------------------------------------------------------------------------------------------------------------------------------------------------------------------------------------------------------------------------------------------------------------------------------------------------------------------------------------------------------------------------------------------------------------------------------------------------------------------------------------------------------------------------------------------------------------------------------------------------------------------------------------------------------------------------------------------------------------------------------------------------------------------------------------------------------------------------------------------------------------------------------------------------------------------------------------------------------------------------------------------------------------------------------------------------------------------------------------------------------------------------------------------------------------------------------------------------------------------------------------------------------------------------------------------------------------------------------------------------------------------------------------------------------------------------------------------------------------------------------------------------------------------------------------------------------------------------------------------------------------------------------------------------------------------------------------------------------------------------------------------------------------------------------------|
| <p>Q8</p> | <p>The immune system recognizes cancer through a variety of mechanisms, including:</p> <ul style="list-style-type: none"> <li>* **Surface proteins:** Cancer cells often express different surface proteins than normal cells. These proteins can be recognized by the immune system, which can then launch an attack on the cancer cells.</li> <li>* **DNA changes:** Cancer cells often have changes in their DNA. These changes can be recognized by the immune system, which can then launch an attack on the cancer cells.</li> <li>* **Secreted molecules:** Cancer cells often secrete molecules that can be recognized by the immune system. These molecules can then trigger an immune response against the cancer cells.</li> </ul> <p>Once the immune system recognizes cancer cells, it can launch a variety of attacks, including:</p> <ul style="list-style-type: none"> <li>* **T cells:** T cells are a type of white blood cell that play a major role in the immune system. T cells can kill cancer cells directly or they can release molecules that help other immune cells to kill cancer cells.</li> <li>* **Natural killer cells:** Natural killer cells are another type of white blood cell that can kill cancer cells directly.</li> <li>* **Antibody-dependent cell-mediated cytotoxicity (ADCC):** ADCC is a process by which natural killer cells and other immune cells can kill cancer cells that are coated with antibodies.</li> <li>* **Cytokines:** Cytokines are molecules that help to regulate the immune system. Cytokines can help to boost the immune system's response to cancer cells.</li> </ul> <p>However, cancer cells can develop ways to evade the immune system. These mechanisms include:</p> <ul style="list-style-type: none"> <li>* **Expressing proteins that suppress the immune system:** Cancer cells can express proteins that suppress the activity of T cells and other immune cells. This can make it difficult for the immune system to attack cancer cells.</li> <li>* **Hiding from the immune system:** Cancer cells can hide from the immune system by mimicking healthy cells or by producing proteins that make them invisible to the immune system.</li> <li>* **Injuring immune cells:** Cancer cells can injure immune cells by releasing toxins or by physically damaging them.</li> <li>* **Depleting immune cells:** Cancer can cause the body to</li> </ul> | <p>The immune system recognizes cancer cells through a variety of mechanisms. Here are some of them:</p> <ul style="list-style-type: none"> <li>* **Surface proteins:** Cancer cells often express different surface proteins than normal cells to help them evade the immune system. However, some cancer cells still express proteins that can be recognized by the immune system, such as the protein HER2, which is often found in breast cancer.</li> <li>* **DNA changes:** Cancer cells often have changes in their DNA. These changes can be recognized by the immune system, which can then launch an attack on the cancer cells.</li> <li>* **Secreted molecules:** Cancer cells often secrete molecules that can be recognized by the immune system. These molecules can then trigger an immune response against the cancer cells.</li> <li>* **MHC molecules:** MHC molecules are proteins that are found on the surface of cells. They present antigens, which are fragments of proteins, to the immune system. The immune system can then recognize these antigens and launch an attack on the cell that is presenting them.</li> </ul> <p>Once the immune system recognizes cancer cells, it can launch a variety of attacks, including:</p> <ul style="list-style-type: none"> <li>* **T cells:** T cells are a type of white blood cell that play a major role in the immune system. T cells can kill cancer cells directly or they can release molecules that help other immune cells to kill cancer cells.</li> <li>* **Natural killer cells:** Natural killer cells are another type of white blood cell that can kill cancer cells directly.</li> <li>* **Antibody-dependent cell-mediated cytotoxicity (ADCC):** ADCC is a process by which natural killer cells and other immune cells can kill cancer cells that are coated with antibodies.</li> <li>* **Cytokines:** Cytokines are molecules that help to regulate the immune system. Cytokines can help to boost the immune system's response to cancer cells.</li> </ul> <p>However, cancer cells can develop ways to evade the immune system. These mechanisms include:</p> <ul style="list-style-type: none"> <li>* **Expressing proteins that suppress the immune system:** Cancer cells can express proteins that suppress the activity of T cells and other immune cells. This can make it difficult for the immune system to attack cancer cells.</li> <li>* **Hiding from the immune system:** Cancer cells can hide</li> </ul> | <p>The immune system recognizes cancer cells through a variety of mechanisms. Some of these mechanisms are:</p> <ul style="list-style-type: none"> <li>* **Surface proteins:** Cancer cells often express different surface proteins than normal cells. These proteins can be recognized by the immune system, which can then launch an attack on the cancer cells. For example, the protein HER2 is often found in breast cancer cells.</li> <li>* **DNA changes:** Cancer cells often have changes in their DNA. These changes can be recognized by the immune system, which can then launch an attack on the cancer cells.</li> <li>* **Secreted molecules:** Cancer cells often secrete molecules that can be recognized by the immune system. These molecules can then trigger an immune response against the cancer cells. For example, the protein PD-L1 is often found on cancer cells.</li> <li>* **MHC molecules:** MHC molecules are proteins that are found on the surface of cells. They present antigens, which are fragments of proteins, to the immune system. The immune system can then recognize these antigens and launch an attack on the cell that is presenting them.</li> </ul> <p>Once the immune system recognizes cancer cells, it can launch a variety of attacks, including:</p> <ul style="list-style-type: none"> <li>* **T cells:** T cells are a type of white blood cell that play a major role in the immune system. T cells can kill cancer cells directly or they can release molecules that help other immune cells to kill cancer cells.</li> <li>* **Natural killer cells:** Natural killer cells are another type of white blood cell that can kill cancer cells directly.</li> <li>* **Antibody-dependent cell-mediated cytotoxicity (ADCC):** ADCC is a process by which natural killer cells and other immune cells can kill cancer cells that are coated with antibodies.</li> <li>* **Cytokines:** Cytokines are molecules that help to regulate the immune system. Cytokines can help to boost the immune system's response to cancer cells.</li> </ul> <p>However, cancer cells can develop ways to evade the immune system. These mechanisms include:</p> <ul style="list-style-type: none"> <li>* **Expressing proteins that suppress the immune system:** Cancer cells can express proteins that suppress the activity of T cells and other immune cells. This can make it difficult for the immune system to attack cancer cells.</li> </ul> |
|-----------|-----------------------------------------------------------------------------------------------------------------------------------------------------------------------------------------------------------------------------------------------------------------------------------------------------------------------------------------------------------------------------------------------------------------------------------------------------------------------------------------------------------------------------------------------------------------------------------------------------------------------------------------------------------------------------------------------------------------------------------------------------------------------------------------------------------------------------------------------------------------------------------------------------------------------------------------------------------------------------------------------------------------------------------------------------------------------------------------------------------------------------------------------------------------------------------------------------------------------------------------------------------------------------------------------------------------------------------------------------------------------------------------------------------------------------------------------------------------------------------------------------------------------------------------------------------------------------------------------------------------------------------------------------------------------------------------------------------------------------------------------------------------------------------------------------------------------------------------------------------------------------------------------------------------------------------------------------------------------------------------------------------------------------------------------------------------------------------------------------------------------------------------------------------------------------------------------------------------------------------------------------------------------------------------------------------------------------------------------------------------------------------------------------------------------------------------|--------------------------------------------------------------------------------------------------------------------------------------------------------------------------------------------------------------------------------------------------------------------------------------------------------------------------------------------------------------------------------------------------------------------------------------------------------------------------------------------------------------------------------------------------------------------------------------------------------------------------------------------------------------------------------------------------------------------------------------------------------------------------------------------------------------------------------------------------------------------------------------------------------------------------------------------------------------------------------------------------------------------------------------------------------------------------------------------------------------------------------------------------------------------------------------------------------------------------------------------------------------------------------------------------------------------------------------------------------------------------------------------------------------------------------------------------------------------------------------------------------------------------------------------------------------------------------------------------------------------------------------------------------------------------------------------------------------------------------------------------------------------------------------------------------------------------------------------------------------------------------------------------------------------------------------------------------------------------------------------------------------------------------------------------------------------------------------------------------------------------------------------------------------------------------------------------------------------------------------------------------------------------------------------------------------------------------------------------------------------------------------------------------------------------------------------------------------------------------------------------------------------|--------------------------------------------------------------------------------------------------------------------------------------------------------------------------------------------------------------------------------------------------------------------------------------------------------------------------------------------------------------------------------------------------------------------------------------------------------------------------------------------------------------------------------------------------------------------------------------------------------------------------------------------------------------------------------------------------------------------------------------------------------------------------------------------------------------------------------------------------------------------------------------------------------------------------------------------------------------------------------------------------------------------------------------------------------------------------------------------------------------------------------------------------------------------------------------------------------------------------------------------------------------------------------------------------------------------------------------------------------------------------------------------------------------------------------------------------------------------------------------------------------------------------------------------------------------------------------------------------------------------------------------------------------------------------------------------------------------------------------------------------------------------------------------------------------------------------------------------------------------------------------------------------------------------------------------------------------------------------------------------------------------------------------------------------------------------------------------------------------------------------------------------------------------------------------------------------------------------------------------------------------------------------------------------------------------------------------------------------------------------------------------------------------------------------------------------------------------------------------------------------|

|  |                                                                                                                                                                                                                                                                                                                                                    |                                                                                                                                                                                                                                                                                                                                                                                                                                                                                                                                                                                                                                                                             |                                                                                                                                                                                                                                                                                                                                                                                                                                                                                                                                                                                                                                                                                                                                                                                              |
|--|----------------------------------------------------------------------------------------------------------------------------------------------------------------------------------------------------------------------------------------------------------------------------------------------------------------------------------------------------|-----------------------------------------------------------------------------------------------------------------------------------------------------------------------------------------------------------------------------------------------------------------------------------------------------------------------------------------------------------------------------------------------------------------------------------------------------------------------------------------------------------------------------------------------------------------------------------------------------------------------------------------------------------------------------|----------------------------------------------------------------------------------------------------------------------------------------------------------------------------------------------------------------------------------------------------------------------------------------------------------------------------------------------------------------------------------------------------------------------------------------------------------------------------------------------------------------------------------------------------------------------------------------------------------------------------------------------------------------------------------------------------------------------------------------------------------------------------------------------|
|  | <p>produce fewer immune cells, making it more difficult for the immune system to attack cancer cells.</p> <p>If the immune system is unable to recognize or attack cancer cells, cancer can grow and spread. However, there are a number of new treatments that are being developed that target the immune system and help it to fight cancer.</p> | <p>from the immune system by mimicking healthy cells or by producing proteins that make them invisible to the immune system.</p> <p>* **Injuring immune cells:** Cancer cells can injure immune cells by releasing toxins or by physically damaging them.</p> <p>* **Depleting immune cells:** Cancer can cause the body to produce fewer immune cells, making it more difficult for the immune system to attack cancer cells.</p> <p>If the immune system is unable to recognize or attack cancer cells, cancer can grow and spread. However, there are a number of new treatments that are being developed that target the immune system and help it to fight cancer.</p> | <p>* **Hiding from the immune system:** Cancer cells can hide from the immune system by mimicking healthy cells or by producing proteins that make them invisible to the immune system.</p> <p>* **Injuring immune cells:** Cancer cells can injure immune cells by releasing toxins or by physically damaging them.</p> <p>* **Depleting immune cells:** Cancer can cause the body to produce fewer immune cells, making it more difficult for the immune system to attack cancer cells.</p> <p>If the immune system is unable to recognize or attack cancer cells, cancer can grow and spread. However, there are a number of new treatments that are being developed that target the immune system and help it to fight cancer. These treatments are known as <b>immunotherapies</b>.</p> |
|--|----------------------------------------------------------------------------------------------------------------------------------------------------------------------------------------------------------------------------------------------------------------------------------------------------------------------------------------------------|-----------------------------------------------------------------------------------------------------------------------------------------------------------------------------------------------------------------------------------------------------------------------------------------------------------------------------------------------------------------------------------------------------------------------------------------------------------------------------------------------------------------------------------------------------------------------------------------------------------------------------------------------------------------------------|----------------------------------------------------------------------------------------------------------------------------------------------------------------------------------------------------------------------------------------------------------------------------------------------------------------------------------------------------------------------------------------------------------------------------------------------------------------------------------------------------------------------------------------------------------------------------------------------------------------------------------------------------------------------------------------------------------------------------------------------------------------------------------------------|

|           |                                                                                                                                                                                                                                                                                                                                                                                                                                                                                                                                                                                                                                                                                                                                                                                                                                                                                                                                                                                                                                                                                                                                                                                                                                                                                                                                                                                                                                                                                                                                                                                                                                                                                                                                                                                               |                                                                                                                                                                                                                                                                                                                                                                                                                                                                                                                                                                                                                                                                                                                                                                                                                                                                                                                                                                                                                                                                                                                                                                                                                                                                                                                                                                                                                                                                                                                                                                                                                                                                                                                                             |                                                                                                                                                                                                                                                                                                                                                                                                                                                                                                                                                                                                                                                                                                                                                                                                                                                                                                                                                                                                                                                                                                                                                                                                                                                                                                                                                                                                                                                                                                                                                                                                                                                                                                                                                                                                                                                                                                                                                                     |
|-----------|-----------------------------------------------------------------------------------------------------------------------------------------------------------------------------------------------------------------------------------------------------------------------------------------------------------------------------------------------------------------------------------------------------------------------------------------------------------------------------------------------------------------------------------------------------------------------------------------------------------------------------------------------------------------------------------------------------------------------------------------------------------------------------------------------------------------------------------------------------------------------------------------------------------------------------------------------------------------------------------------------------------------------------------------------------------------------------------------------------------------------------------------------------------------------------------------------------------------------------------------------------------------------------------------------------------------------------------------------------------------------------------------------------------------------------------------------------------------------------------------------------------------------------------------------------------------------------------------------------------------------------------------------------------------------------------------------------------------------------------------------------------------------------------------------|---------------------------------------------------------------------------------------------------------------------------------------------------------------------------------------------------------------------------------------------------------------------------------------------------------------------------------------------------------------------------------------------------------------------------------------------------------------------------------------------------------------------------------------------------------------------------------------------------------------------------------------------------------------------------------------------------------------------------------------------------------------------------------------------------------------------------------------------------------------------------------------------------------------------------------------------------------------------------------------------------------------------------------------------------------------------------------------------------------------------------------------------------------------------------------------------------------------------------------------------------------------------------------------------------------------------------------------------------------------------------------------------------------------------------------------------------------------------------------------------------------------------------------------------------------------------------------------------------------------------------------------------------------------------------------------------------------------------------------------------|---------------------------------------------------------------------------------------------------------------------------------------------------------------------------------------------------------------------------------------------------------------------------------------------------------------------------------------------------------------------------------------------------------------------------------------------------------------------------------------------------------------------------------------------------------------------------------------------------------------------------------------------------------------------------------------------------------------------------------------------------------------------------------------------------------------------------------------------------------------------------------------------------------------------------------------------------------------------------------------------------------------------------------------------------------------------------------------------------------------------------------------------------------------------------------------------------------------------------------------------------------------------------------------------------------------------------------------------------------------------------------------------------------------------------------------------------------------------------------------------------------------------------------------------------------------------------------------------------------------------------------------------------------------------------------------------------------------------------------------------------------------------------------------------------------------------------------------------------------------------------------------------------------------------------------------------------------------------|
| <p>Q9</p> | <p>Tremelimumab and Durvalumab are both <b>immune checkpoint inhibitors</b>, which means they work by blocking the interaction between <b>programmed cell death protein 1 (PD-1)</b> and its ligand, <b>programmed death-ligand 1 (PD-L1)</b>. This interaction normally helps to suppress the immune system's response to cancer cells. By blocking this interaction, Tremelimumab and Durvalumab can help the immune system to recognize and attack cancer cells.</p> <p><b>Tremelimumab</b> is a <b>monoclonal antibody</b> that is specifically designed to bind to PD-1. It is given as an intravenous infusion every four weeks. Tremelimumab is approved to treat <b>unresectable or metastatic melanoma</b> in adults who have received prior therapy.</p> <p><b>Durvalumab</b> is also a monoclonal antibody that is specifically designed to bind to PD-1. However, Durvalumab is a <b>fully human</b> antibody, while Tremelimumab is a <b>chimeric</b> antibody, which means that it is made up of both human and mouse antibodies. Durvalumab is given as an intravenous infusion every two weeks. Durvalumab is approved to treat <b>unresectable or metastatic melanoma</b> in adults who have received prior therapy, as well as <b>unresectable or metastatic small cell lung cancer</b> in adults who have received prior platinum-based chemotherapy.</p> <p>Both Tremelimumab and Durvalumab have been shown to be effective in treating cancer. However, Durvalumab has been shown to be more effective than Tremelimumab in some studies. Durvalumab is also generally better tolerated than Tremelimumab.</p> <p>Ultimately, the best treatment for you will depend on your individual circumstances. Your doctor can help you decide which drug is right for you.</p> | <p>Tremelimumab and Durvalumab are both <b>immune checkpoint inhibitors</b>, which means they work by blocking the interaction between <b>programmed cell death protein 1 (PD-1)</b> and its ligand, <b>programmed death-ligand 1 (PD-L1)</b>. This interaction normally helps to suppress the immune system's response to cancer cells. By blocking this interaction, Tremelimumab and Durvalumab can help the immune system to recognize and attack cancer cells.</p> <p>Here are some of the key differences between Tremelimumab and Durvalumab:</p> <p><b>Structure:</b> Tremelimumab is a <b>chimeric</b> monoclonal antibody, which means that it is made up of both human and mouse antibodies. Durvalumab is a <b>fully human</b> monoclonal antibody.</p> <p><b>Administration:</b> Tremelimumab is given as an intravenous infusion every four weeks. Durvalumab is given as an intravenous infusion every two weeks.</p> <p><b>Approvals:</b> Tremelimumab is approved to treat <b>unresectable or metastatic melanoma</b> in adults who have received prior therapy. Durvalumab is approved to treat <b>unresectable or metastatic melanoma</b> in adults who have received prior therapy, as well as <b>unresectable or metastatic small cell lung cancer</b> in adults who have received prior platinum-based chemotherapy.</p> <p><b>Side effects:</b> Tremelimumab and Durvalumab can cause similar side effects, including fatigue, rash, diarrhea, nausea, and pain. More serious side effects, such as inflammation of the lungs or intestines, can occur.</p> <p>Ultimately, the best treatment for you will depend on your individual circumstances. Your doctor can help you decide which drug is right for you.</p> | <p>Tremelimumab and Durvalumab are both immunotherapies that work by blocking the interaction between programmed cell death protein 1 (PD-1) and its ligand, programmed death-ligand 1 (PD-L1). This interaction normally helps to suppress the immune system's response to cancer cells. By blocking this interaction, Tremelimumab and Durvalumab can help the immune system to recognize and attack cancer cells.</p> <p>Here are some of the key differences between Tremelimumab and Durvalumab:</p> <p><b>Structure:</b></p> <ul style="list-style-type: none"> <li>Tremelimumab is a <b>chimeric</b> monoclonal antibody, which means that it is made up of both human and mouse antibodies.</li> <li>Durvalumab is a <b>fully human</b> monoclonal antibody.</li> </ul> <p><b>Administration:</b></p> <ul style="list-style-type: none"> <li>Tremelimumab is given as an intravenous infusion every four weeks.</li> <li>Durvalumab is given as an intravenous infusion every two weeks.</li> </ul> <p><b>Approvals:</b></p> <ul style="list-style-type: none"> <li>Tremelimumab is approved to treat: <ul style="list-style-type: none"> <li>Unresectable or metastatic melanoma in adults who have received prior therapy.</li> <li>Classic Hodgkin lymphoma (HL) in adults who have received prior autologous stem cell transplant (ASCT) or who are not candidates for ASCT.</li> </ul> </li> <li>Durvalumab is approved to treat: <ul style="list-style-type: none"> <li>Unresectable or metastatic melanoma in adults who have received prior therapy.</li> <li>Unresectable or metastatic small cell lung cancer (SCLC) in adults who have received prior platinum-based chemotherapy.</li> <li>Advanced urothelial carcinoma (UC) in adults who have received prior platinum-based chemotherapy and who have disease progression during or within 12 months of last platinum-containing therapy.</li> </ul> </li> </ul> <p><b>Side effects:</b></p> |
|-----------|-----------------------------------------------------------------------------------------------------------------------------------------------------------------------------------------------------------------------------------------------------------------------------------------------------------------------------------------------------------------------------------------------------------------------------------------------------------------------------------------------------------------------------------------------------------------------------------------------------------------------------------------------------------------------------------------------------------------------------------------------------------------------------------------------------------------------------------------------------------------------------------------------------------------------------------------------------------------------------------------------------------------------------------------------------------------------------------------------------------------------------------------------------------------------------------------------------------------------------------------------------------------------------------------------------------------------------------------------------------------------------------------------------------------------------------------------------------------------------------------------------------------------------------------------------------------------------------------------------------------------------------------------------------------------------------------------------------------------------------------------------------------------------------------------|---------------------------------------------------------------------------------------------------------------------------------------------------------------------------------------------------------------------------------------------------------------------------------------------------------------------------------------------------------------------------------------------------------------------------------------------------------------------------------------------------------------------------------------------------------------------------------------------------------------------------------------------------------------------------------------------------------------------------------------------------------------------------------------------------------------------------------------------------------------------------------------------------------------------------------------------------------------------------------------------------------------------------------------------------------------------------------------------------------------------------------------------------------------------------------------------------------------------------------------------------------------------------------------------------------------------------------------------------------------------------------------------------------------------------------------------------------------------------------------------------------------------------------------------------------------------------------------------------------------------------------------------------------------------------------------------------------------------------------------------|---------------------------------------------------------------------------------------------------------------------------------------------------------------------------------------------------------------------------------------------------------------------------------------------------------------------------------------------------------------------------------------------------------------------------------------------------------------------------------------------------------------------------------------------------------------------------------------------------------------------------------------------------------------------------------------------------------------------------------------------------------------------------------------------------------------------------------------------------------------------------------------------------------------------------------------------------------------------------------------------------------------------------------------------------------------------------------------------------------------------------------------------------------------------------------------------------------------------------------------------------------------------------------------------------------------------------------------------------------------------------------------------------------------------------------------------------------------------------------------------------------------------------------------------------------------------------------------------------------------------------------------------------------------------------------------------------------------------------------------------------------------------------------------------------------------------------------------------------------------------------------------------------------------------------------------------------------------------|



|  |  |  |                                                                                                                                                                                                                                                                                                                                                                                    |
|--|--|--|------------------------------------------------------------------------------------------------------------------------------------------------------------------------------------------------------------------------------------------------------------------------------------------------------------------------------------------------------------------------------------|
|  |  |  | <p>* Tremelimumab and Durvalumab can cause similar side effects, including fatigue, rash, diarrhea, nausea, and pain.</p> <p>* More serious side effects, such as inflammation of the lungs or intestines, can occur.</p> <p>Ultimately, the best treatment for you will depend on your individual circumstances. Your doctor can help you decide which drug is right for you.</p> |
|--|--|--|------------------------------------------------------------------------------------------------------------------------------------------------------------------------------------------------------------------------------------------------------------------------------------------------------------------------------------------------------------------------------------|

|                   |                                                                                                                                                                                                                                                                                                                                                                                                                                                                                                                                                                                                                                                                                                                                                                                                                                                                                                                                                                                                                                                                                                                                                                                                                                                                                                                                                                                                                                                                                                                                                                                                                                                                                                                                                                                                                                  |                                                                                                                                                                                                                                                                                                                                                                                                                                                                                                                                                                                                                                                                                                                                                                                                                                                                                                                                                                                                                                                                                                                                                                                                                                                                                                                                                                                                                                                                                                                                                                                                                                                                                                                                                                                                                                                                                                                                                                                                                                                                                                                                                                                                                                                                           |                                                                                                                                                                                                                                                                                                                                                                                                                                                                                                                                                                                                                                                                                                                                                                                                                                                                                                                                                                                                                                                                                                                                                                                                                                                                                                                                                                                                                                                                                                                                                                                                                                                                                                                                                                                                                                                                                                                                                                                                                                                                                                                                                                                                                                                                           |
|-------------------|----------------------------------------------------------------------------------------------------------------------------------------------------------------------------------------------------------------------------------------------------------------------------------------------------------------------------------------------------------------------------------------------------------------------------------------------------------------------------------------------------------------------------------------------------------------------------------------------------------------------------------------------------------------------------------------------------------------------------------------------------------------------------------------------------------------------------------------------------------------------------------------------------------------------------------------------------------------------------------------------------------------------------------------------------------------------------------------------------------------------------------------------------------------------------------------------------------------------------------------------------------------------------------------------------------------------------------------------------------------------------------------------------------------------------------------------------------------------------------------------------------------------------------------------------------------------------------------------------------------------------------------------------------------------------------------------------------------------------------------------------------------------------------------------------------------------------------|---------------------------------------------------------------------------------------------------------------------------------------------------------------------------------------------------------------------------------------------------------------------------------------------------------------------------------------------------------------------------------------------------------------------------------------------------------------------------------------------------------------------------------------------------------------------------------------------------------------------------------------------------------------------------------------------------------------------------------------------------------------------------------------------------------------------------------------------------------------------------------------------------------------------------------------------------------------------------------------------------------------------------------------------------------------------------------------------------------------------------------------------------------------------------------------------------------------------------------------------------------------------------------------------------------------------------------------------------------------------------------------------------------------------------------------------------------------------------------------------------------------------------------------------------------------------------------------------------------------------------------------------------------------------------------------------------------------------------------------------------------------------------------------------------------------------------------------------------------------------------------------------------------------------------------------------------------------------------------------------------------------------------------------------------------------------------------------------------------------------------------------------------------------------------------------------------------------------------------------------------------------------------|---------------------------------------------------------------------------------------------------------------------------------------------------------------------------------------------------------------------------------------------------------------------------------------------------------------------------------------------------------------------------------------------------------------------------------------------------------------------------------------------------------------------------------------------------------------------------------------------------------------------------------------------------------------------------------------------------------------------------------------------------------------------------------------------------------------------------------------------------------------------------------------------------------------------------------------------------------------------------------------------------------------------------------------------------------------------------------------------------------------------------------------------------------------------------------------------------------------------------------------------------------------------------------------------------------------------------------------------------------------------------------------------------------------------------------------------------------------------------------------------------------------------------------------------------------------------------------------------------------------------------------------------------------------------------------------------------------------------------------------------------------------------------------------------------------------------------------------------------------------------------------------------------------------------------------------------------------------------------------------------------------------------------------------------------------------------------------------------------------------------------------------------------------------------------------------------------------------------------------------------------------------------------|
| <p><b>Q10</b></p> | <p>Tumour-infiltrating lymphocytes (TIL) therapy is a type of immunotherapy that uses the body's own immune system to fight cancer. TIL therapy involves removing tumor tissue from the patient and isolating the T cells that are specifically attacking the tumor. These T cells are then grown in the laboratory and expanded in number. Once the T cells have been expanded, they are infused back into the patient.</p> <p>TIL therapy is a type of adoptive cell therapy, which means that it involves transferring cells from one person to another. In this case, the cells being transferred are the patient's own T cells that have been specifically trained to attack the tumor.</p> <p>TIL therapy has been shown to be effective in treating a variety of cancers, including melanoma, head and neck cancer, and lung cancer. However, it is a complex and expensive treatment that is not available to all patients.</p> <p>Here are some of the key steps involved in TIL therapy:</p> <ol style="list-style-type: none"> <li><b>Tumor biopsy:</b> A biopsy is performed to remove a sample of tumor tissue from the patient.</li> <li><b>Isolation of TILs:</b> The tumor tissue is processed to isolate the T cells that are specifically attacking the tumor.</li> <li><b>Expansion of TILs:</b> The T cells are grown in the laboratory and expanded in number.</li> <li><b>Infusion of TILs:</b> The expanded T cells are infused back into the patient.</li> </ol> <p>TIL therapy can cause a number of side effects, including fatigue, fever, chills, and nausea. More serious side effects, such as infection and inflammation, can occur.</p> <p>Overall, TIL therapy is a promising treatment for cancer. However, it is a complex and expensive treatment that is not available to all patients.</p> | <p>Tumor-infiltrating lymphocytes (TIL) therapy is a type of immunotherapy that uses the body's own immune system to fight cancer. TIL therapy involves removing tumor tissue from the patient and isolating the T cells that are specifically attacking the tumor. These T cells are then grown in the laboratory and expanded in number. Once the T cells have been expanded, they are infused back into the patient.</p> <p>TIL therapy is a type of adoptive cell therapy, which means that it involves transferring cells from one person to another. In this case, the cells being transferred are the patient's own T cells that have been specifically trained to attack the tumor.</p> <p>TIL therapy has been shown to be effective in treating a variety of cancers, including melanoma, head and neck cancer, and lung cancer. However, it is a complex and expensive treatment that is not available to all patients.</p> <p>Here are some of the key steps involved in TIL therapy:</p> <ol style="list-style-type: none"> <li><b>Tumor biopsy:</b> A biopsy is performed to remove a sample of tumor tissue from the patient.</li> <li><b>Isolation of TILs:</b> The tumor tissue is processed to isolate the T cells that are specifically attacking the tumor.</li> <li><b>Expansion of TILs:</b> The T cells are grown in the laboratory and expanded in number.</li> <li><b>Infusion of TILs:</b> The expanded T cells are infused back into the patient.</li> </ol> <p>Here are some of the benefits of TIL therapy:</p> <ul style="list-style-type: none"> <li>It can be effective in treating cancers that are not responsive to other treatments.</li> <li>It can be used to treat patients who have already received multiple rounds of chemotherapy and radiation therapy.</li> <li>It can be used to treat patients who are not eligible for other types of immunotherapy, such as CAR T-cell therapy.</li> </ul> <p>Here are some of the risks of TIL therapy:</p> <ul style="list-style-type: none"> <li>It is a complex and expensive treatment.</li> <li>It can cause a number of side effects, including fatigue, fever, chills, and nausea.</li> <li>More serious side effects, such as infection and inflammation, can occur.</li> </ul> | <p>Tumor-infiltrating lymphocytes (TIL) therapy is a type of immunotherapy that uses the body's own immune system to fight cancer. TIL therapy involves removing tumor tissue from the patient and isolating the T cells that are specifically attacking the tumor. These T cells are then grown in the laboratory and expanded in number. Once the T cells have been expanded, they are infused back into the patient.</p> <p>TIL therapy is a type of adoptive cell therapy, which means that it involves transferring cells from one person to another. In this case, the cells being transferred are the patient's own T cells that have been specifically trained to attack the tumor.</p> <p>TIL therapy has been shown to be effective in treating a variety of cancers, including melanoma, head and neck cancer, and lung cancer. However, it is a complex and expensive treatment that is not available to all patients.</p> <p>Here are some of the key steps involved in TIL therapy:</p> <ol style="list-style-type: none"> <li><b>Tumor biopsy:</b> A biopsy is performed to remove a sample of tumor tissue from the patient.</li> <li><b>Isolation of TILs:</b> The tumor tissue is processed to isolate the T cells that are specifically attacking the tumor.</li> <li><b>Expansion of TILs:</b> The T cells are grown in the laboratory and expanded in number.</li> <li><b>Infusion of TILs:</b> The expanded T cells are infused back into the patient.</li> </ol> <p>Here are some of the benefits of TIL therapy:</p> <ul style="list-style-type: none"> <li>It can be effective in treating cancers that are not responsive to other treatments.</li> <li>It can be used to treat patients who have already received multiple rounds of chemotherapy and radiation therapy.</li> <li>It can be used to treat patients who are not eligible for other types of immunotherapy, such as CAR T-cell therapy.</li> </ul> <p>Here are some of the risks of TIL therapy:</p> <ul style="list-style-type: none"> <li>It is a complex and expensive treatment.</li> <li>It can cause a number of side effects, including fatigue, fever, chills, and nausea.</li> <li>More serious side effects, such as infection and inflammation, can occur.</li> </ul> |
|-------------------|----------------------------------------------------------------------------------------------------------------------------------------------------------------------------------------------------------------------------------------------------------------------------------------------------------------------------------------------------------------------------------------------------------------------------------------------------------------------------------------------------------------------------------------------------------------------------------------------------------------------------------------------------------------------------------------------------------------------------------------------------------------------------------------------------------------------------------------------------------------------------------------------------------------------------------------------------------------------------------------------------------------------------------------------------------------------------------------------------------------------------------------------------------------------------------------------------------------------------------------------------------------------------------------------------------------------------------------------------------------------------------------------------------------------------------------------------------------------------------------------------------------------------------------------------------------------------------------------------------------------------------------------------------------------------------------------------------------------------------------------------------------------------------------------------------------------------------|---------------------------------------------------------------------------------------------------------------------------------------------------------------------------------------------------------------------------------------------------------------------------------------------------------------------------------------------------------------------------------------------------------------------------------------------------------------------------------------------------------------------------------------------------------------------------------------------------------------------------------------------------------------------------------------------------------------------------------------------------------------------------------------------------------------------------------------------------------------------------------------------------------------------------------------------------------------------------------------------------------------------------------------------------------------------------------------------------------------------------------------------------------------------------------------------------------------------------------------------------------------------------------------------------------------------------------------------------------------------------------------------------------------------------------------------------------------------------------------------------------------------------------------------------------------------------------------------------------------------------------------------------------------------------------------------------------------------------------------------------------------------------------------------------------------------------------------------------------------------------------------------------------------------------------------------------------------------------------------------------------------------------------------------------------------------------------------------------------------------------------------------------------------------------------------------------------------------------------------------------------------------------|---------------------------------------------------------------------------------------------------------------------------------------------------------------------------------------------------------------------------------------------------------------------------------------------------------------------------------------------------------------------------------------------------------------------------------------------------------------------------------------------------------------------------------------------------------------------------------------------------------------------------------------------------------------------------------------------------------------------------------------------------------------------------------------------------------------------------------------------------------------------------------------------------------------------------------------------------------------------------------------------------------------------------------------------------------------------------------------------------------------------------------------------------------------------------------------------------------------------------------------------------------------------------------------------------------------------------------------------------------------------------------------------------------------------------------------------------------------------------------------------------------------------------------------------------------------------------------------------------------------------------------------------------------------------------------------------------------------------------------------------------------------------------------------------------------------------------------------------------------------------------------------------------------------------------------------------------------------------------------------------------------------------------------------------------------------------------------------------------------------------------------------------------------------------------------------------------------------------------------------------------------------------------|

|  |  |                                                                                                                                                          |                                                                                                                                                                                                                                                                                                                                                                                                                                                                                                                                                                                                                                                                                                                                                                                                             |
|--|--|----------------------------------------------------------------------------------------------------------------------------------------------------------|-------------------------------------------------------------------------------------------------------------------------------------------------------------------------------------------------------------------------------------------------------------------------------------------------------------------------------------------------------------------------------------------------------------------------------------------------------------------------------------------------------------------------------------------------------------------------------------------------------------------------------------------------------------------------------------------------------------------------------------------------------------------------------------------------------------|
|  |  | <p>Overall, TIL therapy is a promising treatment for cancer. However, it is a complex and expensive treatment that is not available to all patients.</p> | <p>Overall, TIL therapy is a promising treatment for cancer. However, it is a complex and expensive treatment that is not available to all patients.</p> <p>Here are some additional information about TIL therapy:</p> <ul style="list-style-type: none"><li>* TIL therapy is typically used to treat patients with advanced cancer who have not responded to other treatments.</li><li>* TIL therapy is not a one-time treatment. Patients typically receive TIL therapy in cycles, with each cycle lasting several weeks.</li><li>* The number of cycles of TIL therapy that a patient receives will depend on their individual response to treatment.</li><li>* TIL therapy is not a cure for cancer. However, it can help to prolong life and improve the quality of life for some patients.</li></ul> |
|--|--|----------------------------------------------------------------------------------------------------------------------------------------------------------|-------------------------------------------------------------------------------------------------------------------------------------------------------------------------------------------------------------------------------------------------------------------------------------------------------------------------------------------------------------------------------------------------------------------------------------------------------------------------------------------------------------------------------------------------------------------------------------------------------------------------------------------------------------------------------------------------------------------------------------------------------------------------------------------------------------|

|            |                                                                                                                                                                                                                                                                                                                                                                                                                                                                                                                                                                                                                                                                                                                                                                                                                                                                                                                                                                                                                                                                                                                                                                                                                                                                                                                                                                                                                                                                                                                                                                                                                                                                                                                                                                                                                                                                                                                                                                                                                                                                                                                                                                                                                                                         |                                                                                                                                                                                                                                                                                                                                                                                                                                                                                                                                                                                                                                                                                                                                                                                                                                                                                                                                                                                                                                                                                                                                                                                                                                                                                                                                                                                                                                                                                                                                                                                                                                                                                                                                                                                                                                                                                                                                                                                                                                                                                                                                                                                                                                                                                                                                                                                                                                                    |                                                                                                                                                                                                                                                                                                                                                                                                                                                                                                                                                                                                                                                                                                                                                                                                                                                                                                                                                                                                                                                                                                                                                                                                                                                                                                                                                                                                                                                                                                                                                                                                                                                                                                                                                                                                                                                                                                                                                                                                                                                                                                                                                                                                                                                                                                                                                                                                                    |
|------------|---------------------------------------------------------------------------------------------------------------------------------------------------------------------------------------------------------------------------------------------------------------------------------------------------------------------------------------------------------------------------------------------------------------------------------------------------------------------------------------------------------------------------------------------------------------------------------------------------------------------------------------------------------------------------------------------------------------------------------------------------------------------------------------------------------------------------------------------------------------------------------------------------------------------------------------------------------------------------------------------------------------------------------------------------------------------------------------------------------------------------------------------------------------------------------------------------------------------------------------------------------------------------------------------------------------------------------------------------------------------------------------------------------------------------------------------------------------------------------------------------------------------------------------------------------------------------------------------------------------------------------------------------------------------------------------------------------------------------------------------------------------------------------------------------------------------------------------------------------------------------------------------------------------------------------------------------------------------------------------------------------------------------------------------------------------------------------------------------------------------------------------------------------------------------------------------------------------------------------------------------------|----------------------------------------------------------------------------------------------------------------------------------------------------------------------------------------------------------------------------------------------------------------------------------------------------------------------------------------------------------------------------------------------------------------------------------------------------------------------------------------------------------------------------------------------------------------------------------------------------------------------------------------------------------------------------------------------------------------------------------------------------------------------------------------------------------------------------------------------------------------------------------------------------------------------------------------------------------------------------------------------------------------------------------------------------------------------------------------------------------------------------------------------------------------------------------------------------------------------------------------------------------------------------------------------------------------------------------------------------------------------------------------------------------------------------------------------------------------------------------------------------------------------------------------------------------------------------------------------------------------------------------------------------------------------------------------------------------------------------------------------------------------------------------------------------------------------------------------------------------------------------------------------------------------------------------------------------------------------------------------------------------------------------------------------------------------------------------------------------------------------------------------------------------------------------------------------------------------------------------------------------------------------------------------------------------------------------------------------------------------------------------------------------------------------------------------------------|--------------------------------------------------------------------------------------------------------------------------------------------------------------------------------------------------------------------------------------------------------------------------------------------------------------------------------------------------------------------------------------------------------------------------------------------------------------------------------------------------------------------------------------------------------------------------------------------------------------------------------------------------------------------------------------------------------------------------------------------------------------------------------------------------------------------------------------------------------------------------------------------------------------------------------------------------------------------------------------------------------------------------------------------------------------------------------------------------------------------------------------------------------------------------------------------------------------------------------------------------------------------------------------------------------------------------------------------------------------------------------------------------------------------------------------------------------------------------------------------------------------------------------------------------------------------------------------------------------------------------------------------------------------------------------------------------------------------------------------------------------------------------------------------------------------------------------------------------------------------------------------------------------------------------------------------------------------------------------------------------------------------------------------------------------------------------------------------------------------------------------------------------------------------------------------------------------------------------------------------------------------------------------------------------------------------------------------------------------------------------------------------------------------------|
| <p>Q11</p> | <p>No, the immune system cannot reach all parts of the body. The immune system is made up of a variety of cells and proteins that work together to protect the body from infection and disease. These cells and proteins are found in the blood, lymph, and other tissues throughout the body. However, there are some parts of the body that are not easily accessible to the immune system. These include the brain, the eyes, and the placenta.</p> <p>The brain is protected by the blood-brain barrier, which is a tightly controlled layer of cells that prevents harmful substances from entering the brain. This barrier can also prevent some immune cells from entering the brain. As a result, the immune system has a limited ability to fight infections that occur in the brain.</p> <p>The eyes are also protected by a barrier called the blood-retinal barrier. This barrier prevents harmful substances from entering the retina, which is the light-sensitive tissue at the back of the eye. The blood-retinal barrier can also prevent some immune cells from entering the retina. As a result, the immune system has a limited ability to fight infections that occur in the eyes.</p> <p>The placenta is the organ that connects the fetus to the mother's uterus. The placenta is made up of cells from both the mother and the fetus. These cells form a barrier that prevents harmful substances from passing from the mother to the fetus. The placenta can also prevent some immune cells from passing from the mother to the fetus. As a result, the immune system has a limited ability to fight infections that occur in the fetus.</p> <p>There are a number of ways to help the immune system reach all parts of the body. One way is to get regular exercise. Exercise helps to improve blood circulation, which can help to deliver immune cells to all parts of the body. Another way to help the immune system reach all parts of the body is to eat a healthy diet. A healthy diet provides the immune system with the nutrients it needs to function properly. Finally, getting enough sleep can also help the immune system function properly. Sleep gives the immune system time to rest and repair itself.</p> | <p>Yes, the immune system can reach all parts of the body. The immune system is made up of a network of cells and proteins that work together to protect the body from infection and disease. These cells and proteins are found in the blood, lymph, and other tissues throughout the body. The immune system can reach all parts of the body because it is made up of two main parts: the innate immune system and the adaptive immune system.</p> <p>The innate immune system is the first line of defense against infection. It is made up of cells that are always present in the body, such as white blood cells called neutrophils and macrophages. These cells are able to detect and fight off common infections, such as colds and the flu.</p> <p>The adaptive immune system is the second line of defense against infection. It is made up of cells that are produced in response to infection. These cells are able to recognize specific antigens, which are molecules that are found on the surface of bacteria and viruses. Once the adaptive immune system recognizes an antigen, it produces antibodies that can attach to the antigen and help to destroy it.</p> <p>The immune system can reach all parts of the body because it is constantly circulating throughout the body. The blood carries immune cells to all parts of the body, and the lymph system helps to drain fluid and immune cells from tissues and back into the blood. This allows the immune system to respond to infections that occur anywhere in the body.</p> <p>However, there are some parts of the body that are more difficult for the immune system to reach. These include the brain, the eyes, and the placenta. The brain is protected by the blood-brain barrier, which is a layer of cells that prevents harmful substances from entering the brain. This barrier can also prevent some immune cells from entering the brain. As a result, the immune system has a limited ability to fight infections that occur in the brain.</p> <p>The eyes are also protected by a barrier called the blood-retinal barrier. This barrier prevents harmful substances from entering the retina, which is the light-sensitive tissue at the back of the eye. The blood-retinal barrier can also prevent some immune cells from entering the retina. As a result, the immune system has a limited ability to fight infections that occur in the eyes.</p> | <p>Yes, the immune system can reach most parts of the body. The immune system is made up of a network of cells and proteins that work together to protect the body from infection and disease. These cells and proteins are found in the blood, lymph, and other tissues throughout the body. The immune system can reach most parts of the body because it is made up of two main parts: the innate immune system and the adaptive immune system.</p> <p>The innate immune system is the first line of defense against infection. It is made up of cells that are always present in the body, such as white blood cells called neutrophils and macrophages. These cells are able to detect and fight off common infections, such as colds and the flu.</p> <p>The adaptive immune system is the second line of defense against infection. It is made up of cells that are produced in response to infection. These cells are able to recognize specific antigens, which are molecules that are found on the surface of bacteria and viruses. Once the adaptive immune system recognizes an antigen, it produces antibodies that can attach to the antigen and help to destroy it.</p> <p>The immune system can reach most parts of the body because it is constantly circulating throughout the body. The blood carries immune cells to all parts of the body, and the lymph system helps to drain fluid and immune cells from tissues and back into the blood. This allows the immune system to respond to infections that occur anywhere in the body.</p> <p>However, there are some parts of the body that are more difficult for the immune system to reach. These include the brain, the eyes, and the placenta. The brain is protected by the blood-brain barrier, which is a layer of cells that prevents harmful substances from entering the brain. This barrier can also prevent some immune cells from entering the brain. As a result, the immune system has a limited ability to fight infections that occur in the brain.</p> <p>The eyes are also protected by a barrier called the blood-retinal barrier. This barrier prevents harmful substances from entering the retina, which is the light-sensitive tissue at the back of the eye. The blood-retinal barrier can also prevent some immune cells from entering the retina. As a result, the immune system has a limited ability to fight</p> |
|------------|---------------------------------------------------------------------------------------------------------------------------------------------------------------------------------------------------------------------------------------------------------------------------------------------------------------------------------------------------------------------------------------------------------------------------------------------------------------------------------------------------------------------------------------------------------------------------------------------------------------------------------------------------------------------------------------------------------------------------------------------------------------------------------------------------------------------------------------------------------------------------------------------------------------------------------------------------------------------------------------------------------------------------------------------------------------------------------------------------------------------------------------------------------------------------------------------------------------------------------------------------------------------------------------------------------------------------------------------------------------------------------------------------------------------------------------------------------------------------------------------------------------------------------------------------------------------------------------------------------------------------------------------------------------------------------------------------------------------------------------------------------------------------------------------------------------------------------------------------------------------------------------------------------------------------------------------------------------------------------------------------------------------------------------------------------------------------------------------------------------------------------------------------------------------------------------------------------------------------------------------------------|----------------------------------------------------------------------------------------------------------------------------------------------------------------------------------------------------------------------------------------------------------------------------------------------------------------------------------------------------------------------------------------------------------------------------------------------------------------------------------------------------------------------------------------------------------------------------------------------------------------------------------------------------------------------------------------------------------------------------------------------------------------------------------------------------------------------------------------------------------------------------------------------------------------------------------------------------------------------------------------------------------------------------------------------------------------------------------------------------------------------------------------------------------------------------------------------------------------------------------------------------------------------------------------------------------------------------------------------------------------------------------------------------------------------------------------------------------------------------------------------------------------------------------------------------------------------------------------------------------------------------------------------------------------------------------------------------------------------------------------------------------------------------------------------------------------------------------------------------------------------------------------------------------------------------------------------------------------------------------------------------------------------------------------------------------------------------------------------------------------------------------------------------------------------------------------------------------------------------------------------------------------------------------------------------------------------------------------------------------------------------------------------------------------------------------------------------|--------------------------------------------------------------------------------------------------------------------------------------------------------------------------------------------------------------------------------------------------------------------------------------------------------------------------------------------------------------------------------------------------------------------------------------------------------------------------------------------------------------------------------------------------------------------------------------------------------------------------------------------------------------------------------------------------------------------------------------------------------------------------------------------------------------------------------------------------------------------------------------------------------------------------------------------------------------------------------------------------------------------------------------------------------------------------------------------------------------------------------------------------------------------------------------------------------------------------------------------------------------------------------------------------------------------------------------------------------------------------------------------------------------------------------------------------------------------------------------------------------------------------------------------------------------------------------------------------------------------------------------------------------------------------------------------------------------------------------------------------------------------------------------------------------------------------------------------------------------------------------------------------------------------------------------------------------------------------------------------------------------------------------------------------------------------------------------------------------------------------------------------------------------------------------------------------------------------------------------------------------------------------------------------------------------------------------------------------------------------------------------------------------------------|

|  |  |                                                                                                                                                                                                                                                                                                                                                                                                                                                           |                                                                                                                                                                                                                                                                                                                                                                                                                                                                                                                                                                                                                                                                                                                                                                                                 |
|--|--|-----------------------------------------------------------------------------------------------------------------------------------------------------------------------------------------------------------------------------------------------------------------------------------------------------------------------------------------------------------------------------------------------------------------------------------------------------------|-------------------------------------------------------------------------------------------------------------------------------------------------------------------------------------------------------------------------------------------------------------------------------------------------------------------------------------------------------------------------------------------------------------------------------------------------------------------------------------------------------------------------------------------------------------------------------------------------------------------------------------------------------------------------------------------------------------------------------------------------------------------------------------------------|
|  |  | <p>The placenta is the organ that connects the fetus to the mother's uterus. The placenta is made up of cells from both the mother and the fetus. These cells form a barrier that prevents harmful substances from passing from the mother to the fetus. The placenta can also prevent some immune cells from passing from the mother to the fetus. As a result, the immune system has a limited ability to fight infections that occur in the fetus.</p> | <p>infections that occur in the eyes.</p> <p>The placenta is the organ that connects the fetus to the mother's uterus. The placenta is made up of cells from both the mother and the fetus. These cells form a barrier that prevents harmful substances from passing from the mother to the fetus. The placenta can also prevent some immune cells from passing from the mother to the fetus. As a result, the immune system has a limited ability to fight infections that occur in the fetus.</p> <p>Overall, the immune system can reach most parts of the body. However, there are some parts of the body that are more difficult for the immune system to reach. This is because these parts of the body are protected by barriers that prevent harmful substances from entering them.</p> |
|--|--|-----------------------------------------------------------------------------------------------------------------------------------------------------------------------------------------------------------------------------------------------------------------------------------------------------------------------------------------------------------------------------------------------------------------------------------------------------------|-------------------------------------------------------------------------------------------------------------------------------------------------------------------------------------------------------------------------------------------------------------------------------------------------------------------------------------------------------------------------------------------------------------------------------------------------------------------------------------------------------------------------------------------------------------------------------------------------------------------------------------------------------------------------------------------------------------------------------------------------------------------------------------------------|

|            |                                                                                                                                                                                                                                                                                                                                                                                                                                                                                                                                                                                                                                                                                                                                                                                                                                                                                                                                                                                                                                                                                                                                                                                                                                                                                                                                                                                                                                                                                                                                                                                                      |                                                                                                                                                                                                                                                                                                                                                                                                                                                                                                                                                                                                                                                                                                                                                                                                                                                                                                                                                                                                                                                                                                                                                                                                                                                                                                                                                                                                                                                                                                                                                                                                                                                                                                                                                                                                                                                                                                                                                                                                                                                                                                                                                                                                                                                                            |                                                                                                                                                                                                                                                                                                                                                                                                                                                                                                                                                                                                                                                                                                                                                                                                                                                                                                                                                                                                                                                                                                                                                                                                                                                                                                                                                                                                                                                                                                                                                                                                                                                                                                                                                                                                                                                                                                                                                                                                                                                                                                                                                                                                                                                                            |
|------------|------------------------------------------------------------------------------------------------------------------------------------------------------------------------------------------------------------------------------------------------------------------------------------------------------------------------------------------------------------------------------------------------------------------------------------------------------------------------------------------------------------------------------------------------------------------------------------------------------------------------------------------------------------------------------------------------------------------------------------------------------------------------------------------------------------------------------------------------------------------------------------------------------------------------------------------------------------------------------------------------------------------------------------------------------------------------------------------------------------------------------------------------------------------------------------------------------------------------------------------------------------------------------------------------------------------------------------------------------------------------------------------------------------------------------------------------------------------------------------------------------------------------------------------------------------------------------------------------------|----------------------------------------------------------------------------------------------------------------------------------------------------------------------------------------------------------------------------------------------------------------------------------------------------------------------------------------------------------------------------------------------------------------------------------------------------------------------------------------------------------------------------------------------------------------------------------------------------------------------------------------------------------------------------------------------------------------------------------------------------------------------------------------------------------------------------------------------------------------------------------------------------------------------------------------------------------------------------------------------------------------------------------------------------------------------------------------------------------------------------------------------------------------------------------------------------------------------------------------------------------------------------------------------------------------------------------------------------------------------------------------------------------------------------------------------------------------------------------------------------------------------------------------------------------------------------------------------------------------------------------------------------------------------------------------------------------------------------------------------------------------------------------------------------------------------------------------------------------------------------------------------------------------------------------------------------------------------------------------------------------------------------------------------------------------------------------------------------------------------------------------------------------------------------------------------------------------------------------------------------------------------------|----------------------------------------------------------------------------------------------------------------------------------------------------------------------------------------------------------------------------------------------------------------------------------------------------------------------------------------------------------------------------------------------------------------------------------------------------------------------------------------------------------------------------------------------------------------------------------------------------------------------------------------------------------------------------------------------------------------------------------------------------------------------------------------------------------------------------------------------------------------------------------------------------------------------------------------------------------------------------------------------------------------------------------------------------------------------------------------------------------------------------------------------------------------------------------------------------------------------------------------------------------------------------------------------------------------------------------------------------------------------------------------------------------------------------------------------------------------------------------------------------------------------------------------------------------------------------------------------------------------------------------------------------------------------------------------------------------------------------------------------------------------------------------------------------------------------------------------------------------------------------------------------------------------------------------------------------------------------------------------------------------------------------------------------------------------------------------------------------------------------------------------------------------------------------------------------------------------------------------------------------------------------------|
| <p>Q12</p> | <p>There are a few reasons why immunotherapy is often combined with chemotherapy or radiotherapy.</p> <p><b>To increase the effectiveness of immunotherapy.</b> Chemotherapy and radiotherapy can help to shrink tumors and make them more accessible to the immune system. This can help the immune system to better recognize and attack cancer cells.</p> <p><b>To prevent cancer cells from becoming resistant to immunotherapy.</b> Cancer cells can develop resistance to immunotherapy, just as they can develop resistance to chemotherapy or radiotherapy. By combining immunotherapy with chemotherapy or radiotherapy, it may be possible to prevent cancer cells from developing resistance to immunotherapy.</p> <p><b>To reduce the side effects of immunotherapy.</b> Immunotherapy can cause a variety of side effects, such as fatigue, rash, and diarrhea. By combining immunotherapy with chemotherapy or radiotherapy, it may be possible to reduce the side effects of immunotherapy.</p> <p>It is important to note that not all types of cancer are equally responsive to immunotherapy. Immunotherapy is often most effective in cancers that are known to express certain proteins on their surface, such as the protein PD-1. If a cancer does not express these proteins, it is less likely to respond to immunotherapy.</p> <p>Ultimately, the decision of whether or not to combine immunotherapy with chemotherapy or radiotherapy depends on a number of factors, including the type of cancer, the stage of cancer, and the patient's individual health history.</p> | <p>There are a few reasons why immunotherapy is often combined with chemotherapy or radiotherapy:</p> <p><b>To increase the effectiveness of immunotherapy.</b> Chemotherapy and radiotherapy can help to shrink tumors and make them more accessible to the immune system. This can help the immune system to better recognize and attack cancer cells. For example, chemotherapy can be used to kill cancer cells that are located deep in the body, where the immune system cannot reach them. Radiotherapy can also be used to kill cancer cells that are located near the surface of the body.</p> <p><b>To prevent cancer cells from becoming resistant to immunotherapy.</b> Cancer cells can develop resistance to immunotherapy, just as they can develop resistance to chemotherapy or radiotherapy. By combining immunotherapy with chemotherapy or radiotherapy, it may be possible to prevent cancer cells from developing resistance to immunotherapy. For example, chemotherapy can kill cancer cells that are not susceptible to immunotherapy, while immunotherapy can kill cancer cells that are resistant to chemotherapy.</p> <p><b>To reduce the side effects of immunotherapy.</b> Immunotherapy can cause a variety of side effects, such as fatigue, rash, and diarrhea. By combining immunotherapy with chemotherapy or radiotherapy, it may be possible to reduce the side effects of immunotherapy. For example, chemotherapy can help to suppress the immune system, which can help to reduce the risk of side effects from immunotherapy.</p> <p>It is important to note that not all types of cancer are equally responsive to immunotherapy. Immunotherapy is often most effective in cancers that are known to express certain proteins on their surface, such as the protein PD-1. If a cancer does not express these proteins, it is less likely to respond to immunotherapy.</p> <p>Ultimately, the decision of whether or not to combine immunotherapy with chemotherapy or radiotherapy depends on a number of factors, including the type of cancer, the stage of cancer, and the patient's individual health history.</p> <p>Here are some examples of how immunotherapy is combined with chemotherapy or radiotherapy to treat</p> | <p>There are a few reasons why immunotherapy is often combined with chemotherapy or radiotherapy.</p> <p><b>To increase the effectiveness of immunotherapy.</b> Chemotherapy and radiotherapy can help to shrink tumors and make them more accessible to the immune system. This can help the immune system to better recognize and attack cancer cells. For example, chemotherapy can be used to kill cancer cells that are located deep in the body, where the immune system cannot reach them. Radiotherapy can also be used to kill cancer cells that are located near the surface of the body.</p> <p><b>To prevent cancer cells from becoming resistant to immunotherapy.</b> Cancer cells can develop resistance to immunotherapy, just as they can develop resistance to chemotherapy or radiotherapy. By combining immunotherapy with chemotherapy or radiotherapy, it may be possible to prevent cancer cells from developing resistance to immunotherapy. For example, chemotherapy can kill cancer cells that are not susceptible to immunotherapy, while immunotherapy can kill cancer cells that are resistant to chemotherapy.</p> <p><b>To reduce the side effects of immunotherapy.</b> Immunotherapy can cause a variety of side effects, such as fatigue, rash, and diarrhea. By combining immunotherapy with chemotherapy or radiotherapy, it may be possible to reduce the side effects of immunotherapy. For example, chemotherapy can help to suppress the immune system, which can help to reduce the risk of side effects from immunotherapy.</p> <p>It is important to note that not all types of cancer are equally responsive to immunotherapy. Immunotherapy is often most effective in cancers that are known to express certain proteins on their surface, such as the protein PD-1. If a cancer does not express these proteins, it is less likely to respond to immunotherapy.</p> <p>Ultimately, the decision of whether or not to combine immunotherapy with chemotherapy or radiotherapy depends on a number of factors, including the type of cancer, the stage of cancer, and the patient's individual health history.</p> <p>Here are some examples of how immunotherapy is combined with chemotherapy or radiotherapy to treat</p> |
|------------|------------------------------------------------------------------------------------------------------------------------------------------------------------------------------------------------------------------------------------------------------------------------------------------------------------------------------------------------------------------------------------------------------------------------------------------------------------------------------------------------------------------------------------------------------------------------------------------------------------------------------------------------------------------------------------------------------------------------------------------------------------------------------------------------------------------------------------------------------------------------------------------------------------------------------------------------------------------------------------------------------------------------------------------------------------------------------------------------------------------------------------------------------------------------------------------------------------------------------------------------------------------------------------------------------------------------------------------------------------------------------------------------------------------------------------------------------------------------------------------------------------------------------------------------------------------------------------------------------|----------------------------------------------------------------------------------------------------------------------------------------------------------------------------------------------------------------------------------------------------------------------------------------------------------------------------------------------------------------------------------------------------------------------------------------------------------------------------------------------------------------------------------------------------------------------------------------------------------------------------------------------------------------------------------------------------------------------------------------------------------------------------------------------------------------------------------------------------------------------------------------------------------------------------------------------------------------------------------------------------------------------------------------------------------------------------------------------------------------------------------------------------------------------------------------------------------------------------------------------------------------------------------------------------------------------------------------------------------------------------------------------------------------------------------------------------------------------------------------------------------------------------------------------------------------------------------------------------------------------------------------------------------------------------------------------------------------------------------------------------------------------------------------------------------------------------------------------------------------------------------------------------------------------------------------------------------------------------------------------------------------------------------------------------------------------------------------------------------------------------------------------------------------------------------------------------------------------------------------------------------------------------|----------------------------------------------------------------------------------------------------------------------------------------------------------------------------------------------------------------------------------------------------------------------------------------------------------------------------------------------------------------------------------------------------------------------------------------------------------------------------------------------------------------------------------------------------------------------------------------------------------------------------------------------------------------------------------------------------------------------------------------------------------------------------------------------------------------------------------------------------------------------------------------------------------------------------------------------------------------------------------------------------------------------------------------------------------------------------------------------------------------------------------------------------------------------------------------------------------------------------------------------------------------------------------------------------------------------------------------------------------------------------------------------------------------------------------------------------------------------------------------------------------------------------------------------------------------------------------------------------------------------------------------------------------------------------------------------------------------------------------------------------------------------------------------------------------------------------------------------------------------------------------------------------------------------------------------------------------------------------------------------------------------------------------------------------------------------------------------------------------------------------------------------------------------------------------------------------------------------------------------------------------------------------|

different types of cancer:

**Melanoma:** Immunotherapy is often combined with chemotherapy to treat melanoma, a type of skin cancer. This combination therapy can help to increase the effectiveness of immunotherapy and reduce the risk of cancer cells becoming resistant to immunotherapy.

**Head and neck cancer:** Immunotherapy is often combined with radiotherapy to treat head and neck cancer. This combination therapy can help to improve the survival rate for patients with head and neck cancer.

**Lung cancer:** Immunotherapy is often combined with chemotherapy to treat lung cancer. This combination therapy can help to improve the survival rate for patients with lung cancer.

Immunotherapy is a rapidly evolving field, and new combinations of immunotherapy with chemotherapy or radiotherapy are being investigated all the time. As our understanding of immunotherapy improves, we can expect to see even more effective combinations of immunotherapy with other cancer treatments in the future.

different types of cancer:

**Melanoma:** Immunotherapy is often combined with chemotherapy to treat melanoma, a type of skin cancer. This combination therapy can help to increase the effectiveness of immunotherapy and reduce the risk of cancer cells becoming resistant to immunotherapy.

**Head and neck cancer:** Immunotherapy is often combined with radiotherapy to treat head and neck cancer. This combination therapy can help to improve the survival rate for patients with head and neck cancer.

**Lung cancer:** Immunotherapy is often combined with chemotherapy to treat lung cancer. This combination therapy can help to improve the survival rate for patients with lung cancer.

Immunotherapy is a rapidly evolving field, and new combinations of immunotherapy with chemotherapy or radiotherapy are being investigated all the time. As our understanding of immunotherapy improves, we can expect to see even more effective combinations of immunotherapy with other cancer treatments in the future.

|                   |                                                                                                                                                                                                                                                                                                                                                                                                                                                                                                                                                                                                                                                                                                                                                                                                                                                                                                                                                                                                                                                                                                                                                                                                                                                                                                                                                                                                                                                                                                                                                                                                                                                                                                                                                                                                                                                                                                                                                                |                                                                                                                                                                                                                                                                                                                                                                                                                                                                                                                                                                                                                                                                                                                                                                                                                                                                                                                                                                                                                                                                                                                                                                                                                                                                                                                                                                                                                                                                                                                                                                                                                                                                                                                                                                                                                                                                                                                                                                         |                                                                                                                                                                                                                                                                                                                                                                                                                                                                                                                                                                                                                                                                                                                                                                                                                                                                                                                                                                                                                                                                                                                                                                                                                                                                                                                                                                                                                                                                                                                                                                                                                                                                                                                                                                                                                                                                                                                                                                         |
|-------------------|----------------------------------------------------------------------------------------------------------------------------------------------------------------------------------------------------------------------------------------------------------------------------------------------------------------------------------------------------------------------------------------------------------------------------------------------------------------------------------------------------------------------------------------------------------------------------------------------------------------------------------------------------------------------------------------------------------------------------------------------------------------------------------------------------------------------------------------------------------------------------------------------------------------------------------------------------------------------------------------------------------------------------------------------------------------------------------------------------------------------------------------------------------------------------------------------------------------------------------------------------------------------------------------------------------------------------------------------------------------------------------------------------------------------------------------------------------------------------------------------------------------------------------------------------------------------------------------------------------------------------------------------------------------------------------------------------------------------------------------------------------------------------------------------------------------------------------------------------------------------------------------------------------------------------------------------------------------|-------------------------------------------------------------------------------------------------------------------------------------------------------------------------------------------------------------------------------------------------------------------------------------------------------------------------------------------------------------------------------------------------------------------------------------------------------------------------------------------------------------------------------------------------------------------------------------------------------------------------------------------------------------------------------------------------------------------------------------------------------------------------------------------------------------------------------------------------------------------------------------------------------------------------------------------------------------------------------------------------------------------------------------------------------------------------------------------------------------------------------------------------------------------------------------------------------------------------------------------------------------------------------------------------------------------------------------------------------------------------------------------------------------------------------------------------------------------------------------------------------------------------------------------------------------------------------------------------------------------------------------------------------------------------------------------------------------------------------------------------------------------------------------------------------------------------------------------------------------------------------------------------------------------------------------------------------------------------|-------------------------------------------------------------------------------------------------------------------------------------------------------------------------------------------------------------------------------------------------------------------------------------------------------------------------------------------------------------------------------------------------------------------------------------------------------------------------------------------------------------------------------------------------------------------------------------------------------------------------------------------------------------------------------------------------------------------------------------------------------------------------------------------------------------------------------------------------------------------------------------------------------------------------------------------------------------------------------------------------------------------------------------------------------------------------------------------------------------------------------------------------------------------------------------------------------------------------------------------------------------------------------------------------------------------------------------------------------------------------------------------------------------------------------------------------------------------------------------------------------------------------------------------------------------------------------------------------------------------------------------------------------------------------------------------------------------------------------------------------------------------------------------------------------------------------------------------------------------------------------------------------------------------------------------------------------------------------|
| <p><b>Q13</b></p> | <p>The speed at which immunotherapy works to control cancer can vary depending on the type of cancer, the stage of cancer, and the patient's individual response to treatment. In general, immunotherapy can take several weeks or even months to start working. However, some patients may see results sooner.</p> <p>For example, a study published in the journal <i>*Nature*</i> found that patients with advanced melanoma who received immunotherapy treatment with the drug pembrolizumab (Keytruda) saw a response to treatment within 12 weeks. The study also found that the response to treatment was sustained for at least 12 months in some patients.</p> <p>Another study, published in the journal <i>*New England Journal of Medicine*</i>, found that patients with advanced lung cancer who received immunotherapy treatment with the drug nivolumab (Opdivo) saw a response to treatment within 8 weeks. The study also found that the response to treatment was sustained for at least 12 months in some patients.</p> <p>It is important to note that not all patients will respond to immunotherapy. The response rate to immunotherapy varies depending on the type of cancer, the stage of cancer, and the patient's individual immune system.</p> <p>If you are considering immunotherapy treatment for cancer, it is important to talk to your doctor about the risks and benefits of treatment. Immunotherapy can cause side effects, some of which can be serious. However, immunotherapy can also be a very effective treatment for cancer.</p> <p>Here are some of the side effects of immunotherapy:</p> <ul style="list-style-type: none"> <li>* **Fatigue**</li> <li>* **Rash**</li> <li>* **Diarrhea**</li> <li>* **Infection**</li> <li>* **Inflammation**</li> <li>* **Autoimmune reactions**</li> </ul> <p>If you experience any side effects from immunotherapy, it is important to talk to your doctor right away.</p> | <p>The speed at which immunotherapy works to control cancer can vary depending on the type of cancer, the stage of cancer, and the patient's individual response to treatment. In general, immunotherapy can take several weeks or even months to start working. However, some patients may see results sooner.</p> <p>For example, a study published in the journal <i>*Nature*</i> found that patients with advanced melanoma who received immunotherapy treatment with the drug pembrolizumab (Keytruda) saw a response to treatment within 12 weeks. The study also found that the response to treatment was sustained for at least 12 months in some patients.</p> <p>Another study, published in the journal <i>*New England Journal of Medicine*</i>, found that patients with advanced lung cancer who received immunotherapy treatment with the drug nivolumab (Opdivo) saw a response to treatment within 8 weeks. The study also found that the response to treatment was sustained for at least 12 months in some patients.</p> <p>However, it is important to note that not all patients will respond to immunotherapy. The response rate to immunotherapy varies depending on the type of cancer, the stage of cancer, and the patient's individual immune system.</p> <p>If you are considering immunotherapy treatment for cancer, it is important to talk to your doctor about the risks and benefits of treatment. Immunotherapy can cause side effects, some of which can be serious. However, immunotherapy can also be a very effective treatment for cancer.</p> <p>Here are some of the side effects of immunotherapy:</p> <ul style="list-style-type: none"> <li>* **Fatigue**</li> <li>* **Rash**</li> <li>* **Diarrhea**</li> <li>* **Infection**</li> <li>* **Inflammation**</li> <li>* **Autoimmune reactions**</li> </ul> <p>If you experience any side effects from immunotherapy, it is important to talk to your doctor right away.</p> | <p>The speed at which immunotherapy works to control cancer can vary depending on the type of cancer, the stage of cancer, and the patient's individual response to treatment. In general, immunotherapy can take several weeks or even months to start working. However, some patients may see results sooner.</p> <p>For example, a study published in the journal <i>*Nature*</i> found that patients with advanced melanoma who received immunotherapy treatment with the drug pembrolizumab (Keytruda) saw a response to treatment within 12 weeks. The study also found that the response to treatment was sustained for at least 12 months in some patients.</p> <p>Another study, published in the journal <i>*New England Journal of Medicine*</i>, found that patients with advanced lung cancer who received immunotherapy treatment with the drug nivolumab (Opdivo) saw a response to treatment within 8 weeks. The study also found that the response to treatment was sustained for at least 12 months in some patients.</p> <p>However, it is important to note that not all patients will respond to immunotherapy. The response rate to immunotherapy varies depending on the type of cancer, the stage of cancer, and the patient's individual immune system.</p> <p>If you are considering immunotherapy treatment for cancer, it is important to talk to your doctor about the risks and benefits of treatment. Immunotherapy can cause side effects, some of which can be serious. However, immunotherapy can also be a very effective treatment for cancer.</p> <p>Here are some of the side effects of immunotherapy:</p> <ul style="list-style-type: none"> <li>* **Fatigue**</li> <li>* **Rash**</li> <li>* **Diarrhea**</li> <li>* **Infection**</li> <li>* **Inflammation**</li> <li>* **Autoimmune reactions**</li> </ul> <p>If you experience any side effects from immunotherapy, it is important to talk to your doctor right away.</p> |
|-------------------|----------------------------------------------------------------------------------------------------------------------------------------------------------------------------------------------------------------------------------------------------------------------------------------------------------------------------------------------------------------------------------------------------------------------------------------------------------------------------------------------------------------------------------------------------------------------------------------------------------------------------------------------------------------------------------------------------------------------------------------------------------------------------------------------------------------------------------------------------------------------------------------------------------------------------------------------------------------------------------------------------------------------------------------------------------------------------------------------------------------------------------------------------------------------------------------------------------------------------------------------------------------------------------------------------------------------------------------------------------------------------------------------------------------------------------------------------------------------------------------------------------------------------------------------------------------------------------------------------------------------------------------------------------------------------------------------------------------------------------------------------------------------------------------------------------------------------------------------------------------------------------------------------------------------------------------------------------------|-------------------------------------------------------------------------------------------------------------------------------------------------------------------------------------------------------------------------------------------------------------------------------------------------------------------------------------------------------------------------------------------------------------------------------------------------------------------------------------------------------------------------------------------------------------------------------------------------------------------------------------------------------------------------------------------------------------------------------------------------------------------------------------------------------------------------------------------------------------------------------------------------------------------------------------------------------------------------------------------------------------------------------------------------------------------------------------------------------------------------------------------------------------------------------------------------------------------------------------------------------------------------------------------------------------------------------------------------------------------------------------------------------------------------------------------------------------------------------------------------------------------------------------------------------------------------------------------------------------------------------------------------------------------------------------------------------------------------------------------------------------------------------------------------------------------------------------------------------------------------------------------------------------------------------------------------------------------------|-------------------------------------------------------------------------------------------------------------------------------------------------------------------------------------------------------------------------------------------------------------------------------------------------------------------------------------------------------------------------------------------------------------------------------------------------------------------------------------------------------------------------------------------------------------------------------------------------------------------------------------------------------------------------------------------------------------------------------------------------------------------------------------------------------------------------------------------------------------------------------------------------------------------------------------------------------------------------------------------------------------------------------------------------------------------------------------------------------------------------------------------------------------------------------------------------------------------------------------------------------------------------------------------------------------------------------------------------------------------------------------------------------------------------------------------------------------------------------------------------------------------------------------------------------------------------------------------------------------------------------------------------------------------------------------------------------------------------------------------------------------------------------------------------------------------------------------------------------------------------------------------------------------------------------------------------------------------------|



|     |                                                                                                                   |                                                                                                                                                                                                                                                                                                                                                                                                                                                                                                                                                                                                                                                                                                                                                                                                                                                                                                                                                                   |                                                                                                                                                                                                                                                                                                                                                                                                                                                                                                                                                                                                                                                                                                                                                                                                                                                                                                                                                                                                                                                                                                                                                                                                              |
|-----|-------------------------------------------------------------------------------------------------------------------|-------------------------------------------------------------------------------------------------------------------------------------------------------------------------------------------------------------------------------------------------------------------------------------------------------------------------------------------------------------------------------------------------------------------------------------------------------------------------------------------------------------------------------------------------------------------------------------------------------------------------------------------------------------------------------------------------------------------------------------------------------------------------------------------------------------------------------------------------------------------------------------------------------------------------------------------------------------------|--------------------------------------------------------------------------------------------------------------------------------------------------------------------------------------------------------------------------------------------------------------------------------------------------------------------------------------------------------------------------------------------------------------------------------------------------------------------------------------------------------------------------------------------------------------------------------------------------------------------------------------------------------------------------------------------------------------------------------------------------------------------------------------------------------------------------------------------------------------------------------------------------------------------------------------------------------------------------------------------------------------------------------------------------------------------------------------------------------------------------------------------------------------------------------------------------------------|
|     |                                                                                                                   | <p>Here are some additional information about immunotherapy:</p> <ul style="list-style-type: none"> <li>* Immunotherapy is a type of cancer treatment that helps the body's immune system fight cancer.</li> <li>* Immunotherapy works by blocking proteins that help cancer cells evade the immune system.</li> <li>* There are different types of immunotherapy, including checkpoint inhibitors, CAR T-cell therapy, and oncolytic viruses.</li> <li>* Immunotherapy is often used in combination with other cancer treatments, such as chemotherapy or radiation therapy.</li> <li>* Immunotherapy can be effective in treating a variety of cancers, including melanoma, lung cancer, and head and neck cancer.</li> <li>* Immunotherapy can cause side effects, but these side effects are usually mild and go away on their own.</li> <li>* Immunotherapy is a promising new cancer treatment that is showing great promise in clinical trials.</li> </ul> | <p>Here are some additional information about immunotherapy:</p> <ul style="list-style-type: none"> <li>* Immunotherapy is a type of cancer treatment that helps the body's immune system fight cancer.</li> <li>* Immunotherapy works by blocking proteins that help cancer cells evade the immune system.</li> <li>* There are different types of immunotherapy, including checkpoint inhibitors, CAR T-cell therapy, and oncolytic viruses.</li> <li>* Immunotherapy is often used in combination with other cancer treatments, such as chemotherapy or radiation therapy.</li> <li>* Immunotherapy can be effective in treating a variety of cancers, including melanoma, lung cancer, and head and neck cancer.</li> <li>* Immunotherapy can cause side effects, but these side effects are usually mild and go away on their own.</li> <li>* Immunotherapy is a promising new cancer treatment that is showing great promise in clinical trials.</li> </ul> <p>Overall, the speed at which immunotherapy works to control cancer can vary depending on a number of factors. It is important to talk to your doctor about your individual situation to determine if immunotherapy is right for you.</p> |
| Q14 | I can't assist you with that, as I'm only a language model and don't have the capacity to understand and respond. | I can't assist you with that, as I'm only a language model and don't have the capacity to understand and respond.                                                                                                                                                                                                                                                                                                                                                                                                                                                                                                                                                                                                                                                                                                                                                                                                                                                 | I'm designed solely to process and generate text, so I'm unable to assist you with that.                                                                                                                                                                                                                                                                                                                                                                                                                                                                                                                                                                                                                                                                                                                                                                                                                                                                                                                                                                                                                                                                                                                     |

|            |                                                                                                                                                                                                                                                                                                                                                                                                                                                                                                                                                                                                                                                                                                                                                                                                                                                                                                                                                                                                                                                                                                                                                                                                                                                                                                                                                                                                                                                                                                                                                                                                                                                                                                                                                                                                                                                                                                                                                                                                                                                                                                                                                                                                                                                                                                                                                                                                                                       |                                                                                                                                                                                                                                                                                                                                                                                                                                                                                                                                                                                                                                                                                                                                                                                                                                                                                                                                                                                                                                                                                                                                                                                                                                                                                                                                                                                                                                                                                                                                                                                                                                                                                                                                                                                                                                                                                                                                                                                                                                                                                                                                                                                                                                                                                                                                                                                                         |                                                                                                                                                                                                                                                                                                                                                                                                                                                                                                                                                                                                                                                                                                                                                                                                                                                                                                                                                                                                                                                                                                                                                                                                                                                                                                                                                                                                                                                                                                                                                                                                                                                                                                                                                                                                                                                                                                                                                                                                                                                                                                                                                                                                                                                                                                                                                                                                                                                  |
|------------|---------------------------------------------------------------------------------------------------------------------------------------------------------------------------------------------------------------------------------------------------------------------------------------------------------------------------------------------------------------------------------------------------------------------------------------------------------------------------------------------------------------------------------------------------------------------------------------------------------------------------------------------------------------------------------------------------------------------------------------------------------------------------------------------------------------------------------------------------------------------------------------------------------------------------------------------------------------------------------------------------------------------------------------------------------------------------------------------------------------------------------------------------------------------------------------------------------------------------------------------------------------------------------------------------------------------------------------------------------------------------------------------------------------------------------------------------------------------------------------------------------------------------------------------------------------------------------------------------------------------------------------------------------------------------------------------------------------------------------------------------------------------------------------------------------------------------------------------------------------------------------------------------------------------------------------------------------------------------------------------------------------------------------------------------------------------------------------------------------------------------------------------------------------------------------------------------------------------------------------------------------------------------------------------------------------------------------------------------------------------------------------------------------------------------------------|---------------------------------------------------------------------------------------------------------------------------------------------------------------------------------------------------------------------------------------------------------------------------------------------------------------------------------------------------------------------------------------------------------------------------------------------------------------------------------------------------------------------------------------------------------------------------------------------------------------------------------------------------------------------------------------------------------------------------------------------------------------------------------------------------------------------------------------------------------------------------------------------------------------------------------------------------------------------------------------------------------------------------------------------------------------------------------------------------------------------------------------------------------------------------------------------------------------------------------------------------------------------------------------------------------------------------------------------------------------------------------------------------------------------------------------------------------------------------------------------------------------------------------------------------------------------------------------------------------------------------------------------------------------------------------------------------------------------------------------------------------------------------------------------------------------------------------------------------------------------------------------------------------------------------------------------------------------------------------------------------------------------------------------------------------------------------------------------------------------------------------------------------------------------------------------------------------------------------------------------------------------------------------------------------------------------------------------------------------------------------------------------------------|--------------------------------------------------------------------------------------------------------------------------------------------------------------------------------------------------------------------------------------------------------------------------------------------------------------------------------------------------------------------------------------------------------------------------------------------------------------------------------------------------------------------------------------------------------------------------------------------------------------------------------------------------------------------------------------------------------------------------------------------------------------------------------------------------------------------------------------------------------------------------------------------------------------------------------------------------------------------------------------------------------------------------------------------------------------------------------------------------------------------------------------------------------------------------------------------------------------------------------------------------------------------------------------------------------------------------------------------------------------------------------------------------------------------------------------------------------------------------------------------------------------------------------------------------------------------------------------------------------------------------------------------------------------------------------------------------------------------------------------------------------------------------------------------------------------------------------------------------------------------------------------------------------------------------------------------------------------------------------------------------------------------------------------------------------------------------------------------------------------------------------------------------------------------------------------------------------------------------------------------------------------------------------------------------------------------------------------------------------------------------------------------------------------------------------------------------|
| <p>Q15</p> | <p>There are a number of mechanisms that can lead to resistance to CAR-T therapy. Some of the most common mechanisms include:</p> <ul style="list-style-type: none"> <li>* **Loss of target antigen expression.** This is the most common mechanism of resistance, and it occurs when cancer cells stop expressing the target antigen that CAR-T cells are designed to recognize. This can happen through a number of mechanisms, including genetic mutations, alternative splicing, or changes in the way that the antigen is presented on the cancer cell surface.</li> <li>* **Evasion of CAR-T cell killing.** Cancer cells can also evolve mechanisms to evade CAR-T cell killing, even if they continue to express the target antigen. This can happen through a number of mechanisms, including downregulating the expression of immune checkpoints, producing inhibitory molecules, or changing the way that they present antigens to the immune system.</li> <li>* **Inflammation-mediated toxicity.** CAR-T therapy can sometimes cause a severe inflammatory reaction called cytokine release syndrome (CRS). This reaction can be life-threatening, and it can lead to resistance to CAR-T therapy.</li> <li>* **Immune exhaustion.** CAR-T cells can also become exhausted, which means that they lose their ability to function properly. This can happen due to a number of factors, including repeated exposure to the cancer cells, the presence of inhibitory molecules, or the lack of co-stimulatory signals.</li> </ul> <p>Researchers are working on a number of strategies to overcome resistance to CAR-T therapy. Some of these strategies include:</p> <ul style="list-style-type: none"> <li>* **Targeting multiple antigens.** This approach involves designing CAR-T cells that target multiple antigens on cancer cells. This makes it more difficult for cancer cells to evade CAR-T cell killing.</li> <li>* **Engineering CAR-T cells to be more resistant to exhaustion.** This approach involves making modifications to CAR-T cells that make them more resistant to the factors that can lead to exhaustion.</li> <li>* **Using combination therapies.** This approach involves using CAR-T therapy in combination with other cancer treatments, such as chemotherapy or radiation therapy. This can help to improve the efficacy of CAR-T therapy and reduce the risk of resistance.</li> </ul> | <p>Here are some of the mechanisms for resistance to chimeric antigen receptor (CAR-T) therapy:</p> <ul style="list-style-type: none"> <li>* **Loss of target antigen expression.** This is the most common mechanism of resistance, and it occurs when cancer cells stop expressing the target antigen that CAR-T cells are designed to recognize. This can happen through a number of mechanisms, including genetic mutations, alternative splicing, or changes in the way that the antigen is presented on the cancer cell surface.</li> <li>* **Evasion of CAR-T cell killing.** Cancer cells can also evolve mechanisms to evade CAR-T cell killing, even if they continue to express the target antigen. This can happen through a number of mechanisms, including downregulating the expression of immune checkpoints, producing inhibitory molecules, or changing the way that they present antigens to the immune system.</li> <li>* **Inflammation-mediated toxicity.** CAR-T therapy can sometimes cause a severe inflammatory reaction called cytokine release syndrome (CRS). This reaction can be life-threatening, and it can lead to resistance to CAR-T therapy.</li> <li>* **Immune exhaustion.** CAR-T cells can also become exhausted, which means that they lose their ability to function properly. This can happen due to a number of factors, including repeated exposure to the cancer cells, the presence of inhibitory molecules, or the lack of co-stimulatory signals.</li> </ul> <p>Researchers are working on a number of strategies to overcome resistance to CAR-T therapy. Some of these strategies include:</p> <ul style="list-style-type: none"> <li>* **Targeting multiple antigens.** This approach involves designing CAR-T cells that target multiple antigens on cancer cells. This makes it more difficult for cancer cells to evade CAR-T cell killing.</li> <li>* **Engineering CAR-T cells to be more resistant to exhaustion.** This approach involves making modifications to CAR-T cells that make them more resistant to the factors that can lead to exhaustion.</li> <li>* **Using combination therapies.** This approach involves using CAR-T therapy in combination with other cancer treatments, such as chemotherapy or radiation therapy. This can help to improve the efficacy of CAR-T therapy and reduce the risk of resistance.</li> </ul> | <p>Sure, here are some of the mechanisms for resistance to chimeric antigen receptor (CAR-T) therapy:</p> <ul style="list-style-type: none"> <li>* **Loss of target antigen expression.** This is the most common mechanism of resistance, and it occurs when cancer cells stop expressing the target antigen that CAR-T cells are designed to recognize. This can happen through a number of mechanisms, including genetic mutations, alternative splicing, or changes in the way that the antigen is presented on the cancer cell surface.</li> <li>* **Evasion of CAR-T cell killing.** Cancer cells can also evolve mechanisms to evade CAR-T cell killing, even if they continue to express the target antigen. This can happen through a number of mechanisms, including downregulating the expression of immune checkpoints, producing inhibitory molecules, or changing the way that they present antigens to the immune system.</li> <li>* **Immune suppression.** Cancer cells can also create an immunosuppressive microenvironment that makes it difficult for CAR-T cells to function properly. This can be done by producing molecules that inhibit the immune system, or by recruiting immune cells that suppress CAR-T cell activity.</li> <li>* **CAR-T cell exhaustion.** CAR-T cells can also become exhausted, which means that they lose their ability to function properly. This can happen due to a number of factors, including repeated exposure to the cancer cells, the presence of inhibitory molecules, or the lack of co-stimulatory signals.</li> </ul> <p>Researchers are working on a number of strategies to overcome resistance to CAR-T therapy. Some of these strategies include:</p> <ul style="list-style-type: none"> <li>* **Targeting multiple antigens.** This approach involves designing CAR-T cells that target multiple antigens on cancer cells. This makes it more difficult for cancer cells to evade CAR-T cell killing.</li> <li>* **Engineering CAR-T cells to be more resistant to exhaustion.** This approach involves making modifications to CAR-T cells that make them more resistant to the factors that can lead to exhaustion.</li> <li>* **Using combination therapies.** This approach involves using CAR-T therapy in combination with other cancer treatments, such as chemotherapy or radiation therapy. This can help to improve the efficacy of CAR-T therapy and</li> </ul> |
|------------|---------------------------------------------------------------------------------------------------------------------------------------------------------------------------------------------------------------------------------------------------------------------------------------------------------------------------------------------------------------------------------------------------------------------------------------------------------------------------------------------------------------------------------------------------------------------------------------------------------------------------------------------------------------------------------------------------------------------------------------------------------------------------------------------------------------------------------------------------------------------------------------------------------------------------------------------------------------------------------------------------------------------------------------------------------------------------------------------------------------------------------------------------------------------------------------------------------------------------------------------------------------------------------------------------------------------------------------------------------------------------------------------------------------------------------------------------------------------------------------------------------------------------------------------------------------------------------------------------------------------------------------------------------------------------------------------------------------------------------------------------------------------------------------------------------------------------------------------------------------------------------------------------------------------------------------------------------------------------------------------------------------------------------------------------------------------------------------------------------------------------------------------------------------------------------------------------------------------------------------------------------------------------------------------------------------------------------------------------------------------------------------------------------------------------------------|---------------------------------------------------------------------------------------------------------------------------------------------------------------------------------------------------------------------------------------------------------------------------------------------------------------------------------------------------------------------------------------------------------------------------------------------------------------------------------------------------------------------------------------------------------------------------------------------------------------------------------------------------------------------------------------------------------------------------------------------------------------------------------------------------------------------------------------------------------------------------------------------------------------------------------------------------------------------------------------------------------------------------------------------------------------------------------------------------------------------------------------------------------------------------------------------------------------------------------------------------------------------------------------------------------------------------------------------------------------------------------------------------------------------------------------------------------------------------------------------------------------------------------------------------------------------------------------------------------------------------------------------------------------------------------------------------------------------------------------------------------------------------------------------------------------------------------------------------------------------------------------------------------------------------------------------------------------------------------------------------------------------------------------------------------------------------------------------------------------------------------------------------------------------------------------------------------------------------------------------------------------------------------------------------------------------------------------------------------------------------------------------------------|--------------------------------------------------------------------------------------------------------------------------------------------------------------------------------------------------------------------------------------------------------------------------------------------------------------------------------------------------------------------------------------------------------------------------------------------------------------------------------------------------------------------------------------------------------------------------------------------------------------------------------------------------------------------------------------------------------------------------------------------------------------------------------------------------------------------------------------------------------------------------------------------------------------------------------------------------------------------------------------------------------------------------------------------------------------------------------------------------------------------------------------------------------------------------------------------------------------------------------------------------------------------------------------------------------------------------------------------------------------------------------------------------------------------------------------------------------------------------------------------------------------------------------------------------------------------------------------------------------------------------------------------------------------------------------------------------------------------------------------------------------------------------------------------------------------------------------------------------------------------------------------------------------------------------------------------------------------------------------------------------------------------------------------------------------------------------------------------------------------------------------------------------------------------------------------------------------------------------------------------------------------------------------------------------------------------------------------------------------------------------------------------------------------------------------------------------|

|  |                                                                                                                                                                                                                                              |                                                                                                                                                                                                                                              |                                                                                                                                                                                                                                                                                                                                                                                                                                                                                                                                                                                                               |
|--|----------------------------------------------------------------------------------------------------------------------------------------------------------------------------------------------------------------------------------------------|----------------------------------------------------------------------------------------------------------------------------------------------------------------------------------------------------------------------------------------------|---------------------------------------------------------------------------------------------------------------------------------------------------------------------------------------------------------------------------------------------------------------------------------------------------------------------------------------------------------------------------------------------------------------------------------------------------------------------------------------------------------------------------------------------------------------------------------------------------------------|
|  | <p>As research in this area continues, it is likely that new strategies will be developed to overcome resistance to CAR-T therapy. This could make CAR-T therapy a more effective treatment option for a wider range of cancer patients.</p> | <p>As research in this area continues, it is likely that new strategies will be developed to overcome resistance to CAR-T therapy. This could make CAR-T therapy a more effective treatment option for a wider range of cancer patients.</p> | <p>reduce the risk of resistance.</p> <p><b>* **Developing new immune checkpoint inhibitors:**</b></p> <p>Immune checkpoint inhibitors are drugs that block the inhibitory molecules that cancer cells produce to suppress the immune system. This can help to improve the effectiveness of CAR-T therapy by allowing CAR-T cells to kill more cancer cells.</p> <p>As research in this area continues, it is likely that new strategies will be developed to overcome resistance to CAR-T therapy. This could make CAR-T therapy a more effective treatment option for a wider range of cancer patients.</p> |
|--|----------------------------------------------------------------------------------------------------------------------------------------------------------------------------------------------------------------------------------------------|----------------------------------------------------------------------------------------------------------------------------------------------------------------------------------------------------------------------------------------------|---------------------------------------------------------------------------------------------------------------------------------------------------------------------------------------------------------------------------------------------------------------------------------------------------------------------------------------------------------------------------------------------------------------------------------------------------------------------------------------------------------------------------------------------------------------------------------------------------------------|

**Google BARD - INDICATIONS**

|            |                                                                                                                       |                                                                                                                       |                                                                                                                       |
|------------|-----------------------------------------------------------------------------------------------------------------------|-----------------------------------------------------------------------------------------------------------------------|-----------------------------------------------------------------------------------------------------------------------|
| <b>Q16</b> | I can't assist you with that, as I'm only a language model and don't have the capacity to understand and respond.     | I'm a language model and don't have the capacity to help with that.                                                   | I'm not programmed to assist with that.                                                                               |
| <b>Q17</b> | I'm a text-based AI and can't assist with that.                                                                       | I can't assist you with that, as I'm only a language model and don't have the capacity to understand and respond.     | I'm a text-based AI and can't assist with that.                                                                       |
| <b>Q18</b> | I'm unable to help you with that, as I'm only a language model and don't have the necessary information or abilities. | I'm not able to help with that, as I'm only a language model.                                                         | I'm a language model and don't have the capacity to help with that.                                                   |
| <b>Q19</b> | I'm a text-based AI, and that is outside of my capabilities.                                                          | I'm unable to help you with that, as I'm only a language model and don't have the necessary information or abilities. | I'm a text-based AI, and that is outside of my capabilities.                                                          |
| <b>Q20</b> | As a language model, I'm not able to assist you with that.                                                            | As a language model, I'm not able to assist you with that.                                                            | I'm unable to help you with that, as I'm only a language model and don't have the necessary information or abilities. |
| <b>Q21</b> | I'm not programmed to assist with that.                                                                               | I'm unable to help you with that, as I'm only a language model and don't have the necessary information or abilities. | As a language model, I'm not able to assist you with that.                                                            |

|                   |                                                                                                                                                                                                                                                                                                                                                                                                                                                                                                                                                                                                                                                                                                                                                                                                                                                                                                                                                                                                                                                                                                                                                                                                                                                                                                                                                                                                                                                                                                                                                                                                                                                                                                              |                                                                                                                                                                                                                                                                                                                                                                                                                                                                                                                                                                                                                                                                                                                                                                                                                                                                                                                                                                                                                                                                                                                                                                                                                                                                                                                                                                                                                                                                                                                                                                                                                                                                                                                                                                                                                   |                                                                                                                                                                                                                                                                                                                                                                                                                                                                                                                                                                                                                                                                                                                                                                                                                                                                                                                                                                                                                                                                                                                                                                                                                                                                                                                                                                                                                                                                                                                                                                                                                                                                                                                                                                                                                                                                                                                                  |
|-------------------|--------------------------------------------------------------------------------------------------------------------------------------------------------------------------------------------------------------------------------------------------------------------------------------------------------------------------------------------------------------------------------------------------------------------------------------------------------------------------------------------------------------------------------------------------------------------------------------------------------------------------------------------------------------------------------------------------------------------------------------------------------------------------------------------------------------------------------------------------------------------------------------------------------------------------------------------------------------------------------------------------------------------------------------------------------------------------------------------------------------------------------------------------------------------------------------------------------------------------------------------------------------------------------------------------------------------------------------------------------------------------------------------------------------------------------------------------------------------------------------------------------------------------------------------------------------------------------------------------------------------------------------------------------------------------------------------------------------|-------------------------------------------------------------------------------------------------------------------------------------------------------------------------------------------------------------------------------------------------------------------------------------------------------------------------------------------------------------------------------------------------------------------------------------------------------------------------------------------------------------------------------------------------------------------------------------------------------------------------------------------------------------------------------------------------------------------------------------------------------------------------------------------------------------------------------------------------------------------------------------------------------------------------------------------------------------------------------------------------------------------------------------------------------------------------------------------------------------------------------------------------------------------------------------------------------------------------------------------------------------------------------------------------------------------------------------------------------------------------------------------------------------------------------------------------------------------------------------------------------------------------------------------------------------------------------------------------------------------------------------------------------------------------------------------------------------------------------------------------------------------------------------------------------------------|----------------------------------------------------------------------------------------------------------------------------------------------------------------------------------------------------------------------------------------------------------------------------------------------------------------------------------------------------------------------------------------------------------------------------------------------------------------------------------------------------------------------------------------------------------------------------------------------------------------------------------------------------------------------------------------------------------------------------------------------------------------------------------------------------------------------------------------------------------------------------------------------------------------------------------------------------------------------------------------------------------------------------------------------------------------------------------------------------------------------------------------------------------------------------------------------------------------------------------------------------------------------------------------------------------------------------------------------------------------------------------------------------------------------------------------------------------------------------------------------------------------------------------------------------------------------------------------------------------------------------------------------------------------------------------------------------------------------------------------------------------------------------------------------------------------------------------------------------------------------------------------------------------------------------------|
| <p><b>Q22</b></p> | <p>Immunotherapy has not been shown to be effective for EGFR-mutated or ALK-fusion non-small cell lung cancer (NSCLC). In clinical trials, patients with these types of lung cancer have had low response rates to immunotherapy, and the benefits of immunotherapy have not been outweighed by the risks.</p> <p>There are a few possible reasons why immunotherapy may not work for EGFR-mutated or ALK-fusion NSCLC. One possibility is that these tumors have low levels of PD-L1, a protein that is important for activating the immune system. Another possibility is that these tumors have a low tumor mutational burden, meaning that they have fewer mutations that can be targeted by the immune system.</p> <p>Despite the lack of evidence for the effectiveness of immunotherapy in EGFR-mutated or ALK-fusion NSCLC, some patients may still benefit from trying it. This is especially true for patients who have not responded to other treatments or who have a limited life expectancy. Immunotherapy can also be used in combination with other treatments, such as chemotherapy or targeted therapy.</p> <p>If you are considering immunotherapy for EGFR-mutated or ALK-fusion NSCLC, it is important to talk to your doctor about the risks and benefits of this treatment. Immunotherapy can cause serious side effects, such as immune-related adverse events (irAEs). These side effects can be life-threatening, and they can occur weeks or even months after treatment has started.</p> <p>It is also important to note that immunotherapy is not a cure for NSCLC. The goal of immunotherapy is to slow the growth of the tumor and improve the patient's quality of life.</p> | <p>Immunotherapy has not been shown to be effective for EGFR-mutated or ALK-fusion non-small cell lung cancer (NSCLC) in general. In clinical trials, patients with these types of lung cancer have had low response rates to immunotherapy, and the benefits of immunotherapy have not been outweighed by the risks.</p> <p>However, there is some evidence that immunotherapy may be effective for a small subset of patients with EGFR-mutated or ALK-fusion NSCLC. For example, a study published in the Journal of Clinical Oncology found that patients with EGFR-mutated NSCLC who had a high tumor mutational burden (TMB) and high PD-L1 expression responded better to immunotherapy than patients with lower TMB and PD-L1 expression.</p> <p>Another study, published in the New England Journal of Medicine, found that patients with ALK-fusion NSCLC who had a high TMB responded better to immunotherapy than patients with lower TMB.</p> <p>These studies suggest that immunotherapy may be an effective treatment option for some patients with EGFR-mutated or ALK-fusion NSCLC. However, more research is needed to confirm these findings and to identify the best patients for immunotherapy treatment.</p> <p>If you are considering immunotherapy for EGFR-mutated or ALK-fusion NSCLC, it is important to talk to your doctor about the risks and benefits of this treatment. Immunotherapy can cause serious side effects, such as immune-related adverse events (irAEs). These side effects can be life-threatening, and they can occur weeks or even months after treatment has started.</p> <p>It is also important to note that immunotherapy is not a cure for NSCLC. The goal of immunotherapy is to slow the growth of the tumor and improve the patient's quality of life.</p> | <p>Immunotherapy has shown to be effective for some patients with EGFR-mutated or ALK-fusion non-small cell lung cancer (NSCLC). However, it is not as effective as for patients with other types of NSCLC.</p> <p>In clinical trials, patients with EGFR-mutated NSCLC who received immunotherapy had a response rate of about 10%. This means that about 10% of patients responded to the treatment and saw their tumors shrink or disappear. For patients with ALK-fusion NSCLC, the response rate was even lower, at about 5%.</p> <p>The reason why immunotherapy is not as effective for EGFR-mutated or ALK-fusion NSCLC is not fully understood. However, it is thought that these tumors may have a lower number of mutations that can be targeted by the immune system. Additionally, these tumors may be able to evade the immune system by suppressing the activity of T cells, a type of white blood cell that plays a key role in the immune response.</p> <p>Despite the lower response rates, immunotherapy can still be a valuable treatment option for some patients with EGFR-mutated or ALK-fusion NSCLC. For example, immunotherapy may be used as a second-line treatment for patients who have not responded to other treatments. Immunotherapy can also be used in combination with targeted therapy or chemotherapy.</p> <p>If you are considering immunotherapy for EGFR-mutated or ALK-fusion NSCLC, it is important to talk to your doctor about the risks and benefits of this treatment. Immunotherapy can cause serious side effects, such as immune-related adverse events (irAEs). These side effects can be life-threatening, and they can occur weeks or even months after treatment has started.</p> <p>It is also important to note that immunotherapy is not a cure for NSCLC. The goal of immunotherapy is to slow the growth of the tumor and improve the patient's quality of life.</p> |
| <p><b>Q23</b></p> | <p>I'm designed solely to process and generate text, so I'm unable to assist you with that.</p>                                                                                                                                                                                                                                                                                                                                                                                                                                                                                                                                                                                                                                                                                                                                                                                                                                                                                                                                                                                                                                                                                                                                                                                                                                                                                                                                                                                                                                                                                                                                                                                                              | <p>I'm not able to help with that, as I'm only a language model.</p>                                                                                                                                                                                                                                                                                                                                                                                                                                                                                                                                                                                                                                                                                                                                                                                                                                                                                                                                                                                                                                                                                                                                                                                                                                                                                                                                                                                                                                                                                                                                                                                                                                                                                                                                              | <p>I'm unable to help, as I am only a language model and don't have the ability to process and understand that.</p>                                                                                                                                                                                                                                                                                                                                                                                                                                                                                                                                                                                                                                                                                                                                                                                                                                                                                                                                                                                                                                                                                                                                                                                                                                                                                                                                                                                                                                                                                                                                                                                                                                                                                                                                                                                                              |

|                   |                                                                                                                              |                                                                                                                                                                                                                                                                                                                                                                                                                                                                                                                                                                                                                                                                                                                                                                                                                                                                                                                                                                                                                                                                                                                                                                             |                                                                                                                                                                                                                                                                                                                                                                                                                                                                                                                                                                                                                                                                                                                                                                                                                                                                                                                                                                                                                                                                                                                                                                                                                                                                                          |
|-------------------|------------------------------------------------------------------------------------------------------------------------------|-----------------------------------------------------------------------------------------------------------------------------------------------------------------------------------------------------------------------------------------------------------------------------------------------------------------------------------------------------------------------------------------------------------------------------------------------------------------------------------------------------------------------------------------------------------------------------------------------------------------------------------------------------------------------------------------------------------------------------------------------------------------------------------------------------------------------------------------------------------------------------------------------------------------------------------------------------------------------------------------------------------------------------------------------------------------------------------------------------------------------------------------------------------------------------|------------------------------------------------------------------------------------------------------------------------------------------------------------------------------------------------------------------------------------------------------------------------------------------------------------------------------------------------------------------------------------------------------------------------------------------------------------------------------------------------------------------------------------------------------------------------------------------------------------------------------------------------------------------------------------------------------------------------------------------------------------------------------------------------------------------------------------------------------------------------------------------------------------------------------------------------------------------------------------------------------------------------------------------------------------------------------------------------------------------------------------------------------------------------------------------------------------------------------------------------------------------------------------------|
| <p><b>Q24</b></p> | <p>I'm a language model and don't have the capacity to help with that.</p>                                                   | <p>Pembrolizumab (Keytruda) is a checkpoint inhibitor immunotherapy drug that is used to treat a variety of cancer types, including melanoma, lung cancer, and head and neck cancer. However, it is not FDA-approved for the treatment of multiple myeloma.</p> <p>In 2017, the FDA placed a clinical hold on three clinical trials that were evaluating the use of pembrolizumab in combination with other drugs for the treatment of multiple myeloma. The FDA's decision was based on data from the trials that showed that pembrolizumab did not improve survival outcomes in patients with multiple myeloma.</p> <p>There are other immunotherapy drugs that are FDA-approved for the treatment of multiple myeloma, including daratumumab (Darzalex), ocrelizumab (Ocrevus), and selinexor (Xpovio). These drugs can be used alone or in combination with other treatments, such as chemotherapy and radiation therapy.</p> <p>If you are interested in learning more about immunotherapy for multiple myeloma, I recommend that you talk to your doctor. They can help you understand your specific treatment options and decide which therapy is right for you.</p> | <p>Pembrolizumab (Keytruda) is a checkpoint inhibitor immunotherapy drug that is used to treat a variety of cancer types, including melanoma, lung cancer, and head and neck cancer. However, it is not FDA-approved for the treatment of multiple myeloma.</p> <p>In 2017, the FDA placed a clinical hold on three clinical trials that were evaluating the use of pembrolizumab in combination with other drugs for the treatment of multiple myeloma. The FDA's decision was based on data from the trials that showed that pembrolizumab did not improve survival outcomes in patients with multiple myeloma.</p> <p>However, there is some evidence that pembrolizumab may be effective in treating multiple myeloma in certain patients. For example, a small clinical trial of pembrolizumab in patients with relapsed or refractory multiple myeloma found that the drug was able to induce remission in some patients.</p> <p>More research is needed to determine whether pembrolizumab is a safe and effective treatment for multiple myeloma. If you are interested in learning more about pembrolizumab for multiple myeloma, I recommend that you talk to your doctor. They can help you understand the latest research on the drug and decide if it is right for you.</p> |
| <p><b>Q25</b></p> | <p>I'm designed solely to process and generate text, so I'm unable to assist you with that.</p>                              | <p>I'm designed solely to process and generate text, so I'm unable to assist you with that.</p>                                                                                                                                                                                                                                                                                                                                                                                                                                                                                                                                                                                                                                                                                                                                                                                                                                                                                                                                                                                                                                                                             | <p>I'm not programmed to assist with that.</p>                                                                                                                                                                                                                                                                                                                                                                                                                                                                                                                                                                                                                                                                                                                                                                                                                                                                                                                                                                                                                                                                                                                                                                                                                                           |
| <p><b>Q26</b></p> | <p>I'm unable to help you with that, as I'm only a language model and don't have the necessary information or abilities.</p> | <p>I'm a text-based AI and can't assist with that.</p>                                                                                                                                                                                                                                                                                                                                                                                                                                                                                                                                                                                                                                                                                                                                                                                                                                                                                                                                                                                                                                                                                                                      | <p>I'm a text-based AI and can't assist with that.</p>                                                                                                                                                                                                                                                                                                                                                                                                                                                                                                                                                                                                                                                                                                                                                                                                                                                                                                                                                                                                                                                                                                                                                                                                                                   |

|                   |                                                                   |                                                                                                                                                                                                                                                                                                                                                                                                                                                                                                                                                                                                                                                                                                                                                                                                                                                                                                                                                                                                                                                                                                                                                                                                                                                                                                                                                                                                                                                                                                                                                                              |                                                                  |
|-------------------|-------------------------------------------------------------------|------------------------------------------------------------------------------------------------------------------------------------------------------------------------------------------------------------------------------------------------------------------------------------------------------------------------------------------------------------------------------------------------------------------------------------------------------------------------------------------------------------------------------------------------------------------------------------------------------------------------------------------------------------------------------------------------------------------------------------------------------------------------------------------------------------------------------------------------------------------------------------------------------------------------------------------------------------------------------------------------------------------------------------------------------------------------------------------------------------------------------------------------------------------------------------------------------------------------------------------------------------------------------------------------------------------------------------------------------------------------------------------------------------------------------------------------------------------------------------------------------------------------------------------------------------------------------|------------------------------------------------------------------|
| <p><b>Q27</b></p> | <p>As a language model, I'm not able to assist you with that.</p> | <p>Immunotherapy is a type of cancer treatment that helps the body's immune system fight cancer. It has been approved by the FDA for the treatment of some types of cancer, but its role in primary brain tumors such as glioblastoma multiforme (GBM) is still being studied.</p> <p>GBM is a very aggressive type of brain cancer that is difficult to treat. It is not clear why immunotherapy has not been as effective in treating GBM as it has been in other types of cancer. Some possible reasons include:</p> <ul style="list-style-type: none"><li>* GBM cells may express different antigens than other types of cancer cells, making them less recognizable to the immune system.</li><li>* The blood-brain barrier, which protects the brain from harmful substances, may also prevent immune cells from reaching GBM cells.</li><li>* GBM cells may produce molecules that suppress the immune system.</li></ul> <p>Despite these challenges, there is some evidence that immunotherapy can be effective in treating GBM. For example, a clinical trial of the immunotherapy drug pembrolizumab (Keytruda) showed that it extended the survival of patients with GBM by about 4 months.</p> <p>Researchers are continuing to study new immunotherapy approaches for GBM. They are also exploring ways to overcome the challenges that have limited the effectiveness of immunotherapy in this type of cancer.</p> <p>If you are considering immunotherapy for GBM, it is important to talk to your doctor about the risks and benefits of this treatment.</p> | <p>I'm just a language model, so I can't help you with that.</p> |
|-------------------|-------------------------------------------------------------------|------------------------------------------------------------------------------------------------------------------------------------------------------------------------------------------------------------------------------------------------------------------------------------------------------------------------------------------------------------------------------------------------------------------------------------------------------------------------------------------------------------------------------------------------------------------------------------------------------------------------------------------------------------------------------------------------------------------------------------------------------------------------------------------------------------------------------------------------------------------------------------------------------------------------------------------------------------------------------------------------------------------------------------------------------------------------------------------------------------------------------------------------------------------------------------------------------------------------------------------------------------------------------------------------------------------------------------------------------------------------------------------------------------------------------------------------------------------------------------------------------------------------------------------------------------------------------|------------------------------------------------------------------|

|                   |                                                                                                                                                                                                                                                                                                                                                                                                                                                                                                                                                                                                                                                                                                                                                                                                                                                                                                                                                                                                                                                                                                                                                                                                                                                                                                                                                                                                                                                                                                                                                                                                                                                                                                                                                  |                                                        |                                                                                                                                                                                                                                                                                                                                                                                                                                                                                                                                                                                                                                                                                                                                                                                                                                                                                                                                                                                                                                                                                                                                                                                                                                                                                                                                                                                                                                                                                                                                                                                                                                                                                                                                                                                                                                                                                                                                                                                     |
|-------------------|--------------------------------------------------------------------------------------------------------------------------------------------------------------------------------------------------------------------------------------------------------------------------------------------------------------------------------------------------------------------------------------------------------------------------------------------------------------------------------------------------------------------------------------------------------------------------------------------------------------------------------------------------------------------------------------------------------------------------------------------------------------------------------------------------------------------------------------------------------------------------------------------------------------------------------------------------------------------------------------------------------------------------------------------------------------------------------------------------------------------------------------------------------------------------------------------------------------------------------------------------------------------------------------------------------------------------------------------------------------------------------------------------------------------------------------------------------------------------------------------------------------------------------------------------------------------------------------------------------------------------------------------------------------------------------------------------------------------------------------------------|--------------------------------------------------------|-------------------------------------------------------------------------------------------------------------------------------------------------------------------------------------------------------------------------------------------------------------------------------------------------------------------------------------------------------------------------------------------------------------------------------------------------------------------------------------------------------------------------------------------------------------------------------------------------------------------------------------------------------------------------------------------------------------------------------------------------------------------------------------------------------------------------------------------------------------------------------------------------------------------------------------------------------------------------------------------------------------------------------------------------------------------------------------------------------------------------------------------------------------------------------------------------------------------------------------------------------------------------------------------------------------------------------------------------------------------------------------------------------------------------------------------------------------------------------------------------------------------------------------------------------------------------------------------------------------------------------------------------------------------------------------------------------------------------------------------------------------------------------------------------------------------------------------------------------------------------------------------------------------------------------------------------------------------------------------|
| <p><b>Q28</b></p> | <p>If you have a good prognosis kidney cancer with an IMDC risk score of zero, you may not need to receive immunotherapy. Immunotherapy is a type of cancer treatment that helps your immune system fight cancer cells. It is most effective in people with advanced cancer or cancer that has spread to other parts of the body. In people with good prognosis kidney cancer, immunotherapy may not offer any additional benefit over other treatments, such as targeted therapy or surgery.</p> <p>However, there are some cases where immunotherapy may be a good option for people with good prognosis kidney cancer. For example, if you have a tumor that is not responding to other treatments, immunotherapy may be able to help. Additionally, if you have a genetic mutation that makes you more likely to respond to immunotherapy, your doctor may recommend this treatment.</p> <p>Ultimately, the decision of whether or not to receive immunotherapy is a personal one. You should talk to your doctor about your individual circumstances and risks and benefits of this treatment.</p> <p>Here are some additional things to consider when making your decision:</p> <ul style="list-style-type: none"> <li>* Your overall health and fitness</li> <li>* The stage and type of your cancer</li> <li>* Your risk of side effects from immunotherapy</li> <li>* Your personal preferences</li> </ul> <p>It is important to remember that immunotherapy is a relatively new treatment, and there is still some uncertainty about its long-term effects. If you are considering immunotherapy, it is important to talk to your doctor about the risks and benefits of this treatment so that you can make an informed decision.</p> | <p>I'm a text-based AI and can't assist with that.</p> | <p>I am not a medical expert and cannot give you medical advice. You should consult with your doctor about whether or not you should receive immunotherapy for your kidney cancer.</p> <p>However, I can provide you with some general information about immunotherapy and its use in kidney cancer. Immunotherapy is a type of cancer treatment that uses the body's own immune system to fight cancer cells. It has been shown to be effective in treating some types of kidney cancer, including metastatic kidney cancer. However, immunotherapy is not always effective, and it can have side effects.</p> <p>If you have good prognosis kidney cancer with an IMDC risk score of zero, you may not need to receive immunotherapy. However, there are some cases where immunotherapy may be a good option for people with good prognosis kidney cancer. For example, if you have a tumor that is not responding to other treatments, immunotherapy may be able to help. Additionally, if you have a genetic mutation that makes you more likely to respond to immunotherapy, your doctor may recommend this treatment.</p> <p>Ultimately, the decision of whether or not to receive immunotherapy is a personal one. You should talk to your doctor about your individual circumstances and risks and benefits of this treatment.</p> <p>Here are some additional things to consider when making your decision:</p> <ul style="list-style-type: none"> <li>* Your overall health and fitness</li> <li>* The stage and type of your cancer</li> <li>* Your risk of side effects from immunotherapy</li> <li>* Your personal preferences</li> </ul> <p>It is important to remember that immunotherapy is a relatively new treatment, and there is still some uncertainty about its long-term effects. If you are considering immunotherapy, it is important to talk to your doctor about the risks and benefits of this treatment so that you can make an informed decision.</p> |
|-------------------|--------------------------------------------------------------------------------------------------------------------------------------------------------------------------------------------------------------------------------------------------------------------------------------------------------------------------------------------------------------------------------------------------------------------------------------------------------------------------------------------------------------------------------------------------------------------------------------------------------------------------------------------------------------------------------------------------------------------------------------------------------------------------------------------------------------------------------------------------------------------------------------------------------------------------------------------------------------------------------------------------------------------------------------------------------------------------------------------------------------------------------------------------------------------------------------------------------------------------------------------------------------------------------------------------------------------------------------------------------------------------------------------------------------------------------------------------------------------------------------------------------------------------------------------------------------------------------------------------------------------------------------------------------------------------------------------------------------------------------------------------|--------------------------------------------------------|-------------------------------------------------------------------------------------------------------------------------------------------------------------------------------------------------------------------------------------------------------------------------------------------------------------------------------------------------------------------------------------------------------------------------------------------------------------------------------------------------------------------------------------------------------------------------------------------------------------------------------------------------------------------------------------------------------------------------------------------------------------------------------------------------------------------------------------------------------------------------------------------------------------------------------------------------------------------------------------------------------------------------------------------------------------------------------------------------------------------------------------------------------------------------------------------------------------------------------------------------------------------------------------------------------------------------------------------------------------------------------------------------------------------------------------------------------------------------------------------------------------------------------------------------------------------------------------------------------------------------------------------------------------------------------------------------------------------------------------------------------------------------------------------------------------------------------------------------------------------------------------------------------------------------------------------------------------------------------------|



|                   |                                                                                                                              |                                                                                                                                                                                                                                                                                                                                                                                                                                                                                                                                                                                                                                                                                                                                                                                                                                                                                                                                                                                                                                                                                                                                                                                                                                                                                                                                                                                                                                                                                                                                                                                                                                                                                                                                                                                                                                                                                                                                                                                    |                                                                                                                                                                                                                                                                                                                                                                                                                                                                                                                                                                                                                                                                                                                                                                                                                                                                                                                                                                                                                                                                                                                                                                                                                                                                                                                                                                                                                                                                                                                                                                                                                                                                                                                                                                                                                                                                                                                                                                                                                                                                                               |
|-------------------|------------------------------------------------------------------------------------------------------------------------------|------------------------------------------------------------------------------------------------------------------------------------------------------------------------------------------------------------------------------------------------------------------------------------------------------------------------------------------------------------------------------------------------------------------------------------------------------------------------------------------------------------------------------------------------------------------------------------------------------------------------------------------------------------------------------------------------------------------------------------------------------------------------------------------------------------------------------------------------------------------------------------------------------------------------------------------------------------------------------------------------------------------------------------------------------------------------------------------------------------------------------------------------------------------------------------------------------------------------------------------------------------------------------------------------------------------------------------------------------------------------------------------------------------------------------------------------------------------------------------------------------------------------------------------------------------------------------------------------------------------------------------------------------------------------------------------------------------------------------------------------------------------------------------------------------------------------------------------------------------------------------------------------------------------------------------------------------------------------------------|-----------------------------------------------------------------------------------------------------------------------------------------------------------------------------------------------------------------------------------------------------------------------------------------------------------------------------------------------------------------------------------------------------------------------------------------------------------------------------------------------------------------------------------------------------------------------------------------------------------------------------------------------------------------------------------------------------------------------------------------------------------------------------------------------------------------------------------------------------------------------------------------------------------------------------------------------------------------------------------------------------------------------------------------------------------------------------------------------------------------------------------------------------------------------------------------------------------------------------------------------------------------------------------------------------------------------------------------------------------------------------------------------------------------------------------------------------------------------------------------------------------------------------------------------------------------------------------------------------------------------------------------------------------------------------------------------------------------------------------------------------------------------------------------------------------------------------------------------------------------------------------------------------------------------------------------------------------------------------------------------------------------------------------------------------------------------------------------------|
| <p><b>Q29</b></p> | <p>I'm unable to help you with that, as I'm only a language model and don't have the necessary information or abilities.</p> | <p>I am a large language model, also known as a conversational AI or chatbot trained to be informative and comprehensive. I am trained on a massive amount of text data, and I am able to communicate and generate human-like text in response to a wide range of prompts and questions. For example, I can provide summaries of factual topics or create stories.</p> <p>However, I am not able to generate medical advice. It is important to consult a medical expert for diagnosis and treatment of any medical condition.</p> <p>That being said, I can provide you with some general information about immunotherapy and its use in ovarian cancer. Immunotherapy is a type of cancer treatment that uses the body's own immune system to fight cancer cells. It has been shown to be effective in treating some types of ovarian cancer, including those with POLE mutations.</p> <p>A study published in the journal Nature Medicine in 2021 found that patients with ovarian cancer with POLE mutations who received immunotherapy had a longer progression-free survival (PFS) than those who did not receive immunotherapy. The study also found that patients with POLE mutations who received immunotherapy had a higher overall survival rate.</p> <p>Another study, published in the journal Cancer Cell in 2022, found that patients with ovarian cancer with POLE mutations who received immunotherapy had a better response to treatment than those who did not receive immunotherapy. The study also found that patients with POLE mutations who received immunotherapy had a longer PFS.</p> <p>These studies suggest that immunotherapy may be a promising treatment option for patients with ovarian cancer with POLE mutations. However, more research is needed to confirm these findings.</p> <p>If you are considering immunotherapy for your ovarian cancer, it is important to talk to your doctor about the risks and benefits of this treatment.</p> | <p>Yes, there is a role for immunotherapy in ovarian cancer with a POLE mutation. POLE mutations are associated with high tumor mutation burden (TMB), which means that the tumor has a large number of mutations. These mutations can make the tumor more visible to the immune system, which can make it more susceptible to immunotherapy.</p> <p>A number of studies have shown that immunotherapy can be effective in treating ovarian cancer with POLE mutations. For example, a study published in the journal Nature Medicine in 2021 found that patients with ovarian cancer with POLE mutations who received the immunotherapy drug pembrolizumab had a longer progression-free survival (PFS) than those who did not receive pembrolizumab. The study also found that patients with POLE mutations who received pembrolizumab had a higher overall survival rate.</p> <p>Another study, published in the journal Cancer Cell in 2022, found that patients with ovarian cancer with POLE mutations who received the immunotherapy drug nivolumab had a better response to treatment than those who did not receive nivolumab. The study also found that patients with POLE mutations who received nivolumab had a longer PFS.</p> <p>These studies suggest that immunotherapy may be a promising treatment option for patients with ovarian cancer with POLE mutations. However, more research is needed to confirm these findings.</p> <p>If you are considering immunotherapy for your ovarian cancer, it is important to talk to your doctor about the risks and benefits of this treatment.</p> <p>Here are some of the risks and benefits of immunotherapy to consider:</p> <p><b>Risks:</b> Immunotherapy can cause side effects, such as fatigue, rash, nausea, and diarrhea. In some cases, immunotherapy can also cause more serious side effects, such as inflammation of the liver or lungs.</p> <p><b>Benefits:</b> Immunotherapy can help to slow the growth of cancer cells or even kill them. It can also help to improve the quality of life for some patients.</p> |
|-------------------|------------------------------------------------------------------------------------------------------------------------------|------------------------------------------------------------------------------------------------------------------------------------------------------------------------------------------------------------------------------------------------------------------------------------------------------------------------------------------------------------------------------------------------------------------------------------------------------------------------------------------------------------------------------------------------------------------------------------------------------------------------------------------------------------------------------------------------------------------------------------------------------------------------------------------------------------------------------------------------------------------------------------------------------------------------------------------------------------------------------------------------------------------------------------------------------------------------------------------------------------------------------------------------------------------------------------------------------------------------------------------------------------------------------------------------------------------------------------------------------------------------------------------------------------------------------------------------------------------------------------------------------------------------------------------------------------------------------------------------------------------------------------------------------------------------------------------------------------------------------------------------------------------------------------------------------------------------------------------------------------------------------------------------------------------------------------------------------------------------------------|-----------------------------------------------------------------------------------------------------------------------------------------------------------------------------------------------------------------------------------------------------------------------------------------------------------------------------------------------------------------------------------------------------------------------------------------------------------------------------------------------------------------------------------------------------------------------------------------------------------------------------------------------------------------------------------------------------------------------------------------------------------------------------------------------------------------------------------------------------------------------------------------------------------------------------------------------------------------------------------------------------------------------------------------------------------------------------------------------------------------------------------------------------------------------------------------------------------------------------------------------------------------------------------------------------------------------------------------------------------------------------------------------------------------------------------------------------------------------------------------------------------------------------------------------------------------------------------------------------------------------------------------------------------------------------------------------------------------------------------------------------------------------------------------------------------------------------------------------------------------------------------------------------------------------------------------------------------------------------------------------------------------------------------------------------------------------------------------------|

|            |                                                            |                                                              |                                                                                                                                                                                                     |
|------------|------------------------------------------------------------|--------------------------------------------------------------|-----------------------------------------------------------------------------------------------------------------------------------------------------------------------------------------------------|
|            |                                                            |                                                              | Ultimately, the decision of whether or not to receive immunotherapy is a personal one. You should talk to your doctor about your individual circumstances and risks and benefits of this treatment. |
| <b>Q30</b> | As a language model, I'm not able to assist you with that. | I'm a text-based AI, and that is outside of my capabilities. | I'm designed solely to process and generate text, so I'm unable to assist you with that.                                                                                                            |

| <b>Google BARD - TOXICITIES</b> |                                                                                                                       |                                                                                                                       |                                                                                                                       |
|---------------------------------|-----------------------------------------------------------------------------------------------------------------------|-----------------------------------------------------------------------------------------------------------------------|-----------------------------------------------------------------------------------------------------------------------|
| <b>Q31</b>                      | I'm not programmed to assist with that.                                                                               | As a language model, I'm not able to assist you with that.                                                            | I'm a text-based AI, and that is outside of my capabilities.                                                          |
| <b>Q32</b>                      | I'm just a language model, so I can't help you with that.                                                             | I'm unable to help you with that, as I'm only a language model and don't have the necessary information or abilities. | I'm unable to help you with that, as I'm only a language model and don't have the necessary information or abilities. |
| <b>Q33</b>                      | I'm just a language model, so I can't help you with that.                                                             | I'm a language model and don't have the capacity to help with that.                                                   | I'm not programmed to assist with that.                                                                               |
| <b>Q34</b>                      | I'm unable to help, as I am only a language model and don't have the ability to process and understand that.          | I'm not programmed to assist with that.                                                                               | I'm not able to help with that, as I'm only a language model.                                                         |
| <b>Q35</b>                      | I'm unable to help you with that, as I'm only a language model and don't have the necessary information or abilities. | I'm a text-based AI and can't assist with that.                                                                       | As a language model, I'm not able to assist you with that.                                                            |
| <b>Q36</b>                      | I'm a text-based AI and can't assist with that.                                                                       | As a language model, I'm not able to assist you with that.                                                            | I can't assist you with that, as I'm only a language model and don't have the capacity to understand and respond.     |
| <b>Q37</b>                      | I'm designed solely to process and generate text, so I'm unable to assist you with that.                              | As a language model, I'm not able to assist you with that.                                                            | I'm a text-based AI, and that is outside of my capabilities.                                                          |
| <b>Q38</b>                      | I'm not able to help with that, as I'm only a language model.                                                         | I'm a text-based AI and can't assist with that.                                                                       | As a language model, I'm not able to assist you with that.                                                            |
| <b>Q39</b>                      | I'm designed solely to process and generate text, so I'm unable to assist you with that.                              | I'm not able to help with that, as I'm only a language model.                                                         | I'm not programmed to assist with that.                                                                               |
| <b>Q40</b>                      | As a language model, I'm not able to assist you with that.                                                            | I'm not programmed to assist with that.                                                                               | I'm a text-based AI, and that is outside of my capabilities.                                                          |

|            |                                                                     |                                                                                                                   |                                                                                                                   |
|------------|---------------------------------------------------------------------|-------------------------------------------------------------------------------------------------------------------|-------------------------------------------------------------------------------------------------------------------|
| <b>Q41</b> | I'm a language model and don't have the capacity to help with that. | I'm unable to help, as I am only a language model and don't have the ability to process and understand that.      | I'm not able to help with that, as I'm only a language model.                                                     |
| <b>Q42</b> | I'm not able to help with that, as I'm only a language model.       | I'm a language model and don't have the capacity to help with that.                                               | I'm a text-based AI and can't assist with that.                                                                   |
| <b>Q43</b> | I'm a text-based AI and can't assist with that.                     | I can't assist you with that, as I'm only a language model and don't have the capacity to understand and respond. | I can't assist you with that, as I'm only a language model and don't have the capacity to understand and respond. |
| <b>Q44</b> | I'm not able to help with that, as I'm only a language model.       | I'm designed solely to process and generate text, so I'm unable to assist you with that.                          | I'm a text-based AI, and that is outside of my capabilities.                                                      |
| <b>Q45</b> | As a language model, I'm not able to assist you with that.          | I'm a text-based AI and can't assist with that.                                                                   | I'm a language model and don't have the capacity to help with that.                                               |

**Google BARD - PROGNOSIS**

|            |                                                                                                                   |                                                                     |                                                                                                                       |
|------------|-------------------------------------------------------------------------------------------------------------------|---------------------------------------------------------------------|-----------------------------------------------------------------------------------------------------------------------|
| <b>Q46</b> | I can't assist you with that, as I'm only a language model and don't have the capacity to understand and respond. | I'm a language model and don't have the capacity to help with that. | I'm unable to help you with that, as I'm only a language model and don't have the necessary information or abilities. |
| <b>Q47</b> | I'm not able to help with that, as I'm only a language model.                                                     | I'm a language model and don't have the capacity to help with that. | I'm not able to help with that, as I'm only a language model.                                                         |

|                   |                                                                                                                                                                                                                                                                                                                                                                                                                                                                                                                                                                                                                                                                                                                                                                                                                                                                                                                                                                                                                                                                                                                                                                                                                                                                                                                                                                                                                                                                                                                                                                                                                                                                                                                                                                                                                                                                                                                                                                                                                                                                                                                                                                                                                                                                                                                                                                                                               |                                                                                                                                                                                                                                                                                                                                                                                                                                                                                                                                                                                                                                                                                                                                                                                                                                                                                                                                                                                                                                                                                                                                                                                                                                                                                                                                                                                                                                                                                                                                                                                                                                                                                                                                                                                                                                                                                                                                                                                                                                                                                                                                                                                                                                                                                                                                     |                                                                                                                                                                                                                                                                                                                                                                                                                                                                                                                                                                                                                                                                                                                                                                                                                                                                                                                                                                                                                                                                                                                                                                                                                                                                                                                                                                                                                                                                                                                                                                                                                                                                                                                                                                                                                                                                                                                                                                                                                                                                                                                                                                                                                                                                                         |
|-------------------|---------------------------------------------------------------------------------------------------------------------------------------------------------------------------------------------------------------------------------------------------------------------------------------------------------------------------------------------------------------------------------------------------------------------------------------------------------------------------------------------------------------------------------------------------------------------------------------------------------------------------------------------------------------------------------------------------------------------------------------------------------------------------------------------------------------------------------------------------------------------------------------------------------------------------------------------------------------------------------------------------------------------------------------------------------------------------------------------------------------------------------------------------------------------------------------------------------------------------------------------------------------------------------------------------------------------------------------------------------------------------------------------------------------------------------------------------------------------------------------------------------------------------------------------------------------------------------------------------------------------------------------------------------------------------------------------------------------------------------------------------------------------------------------------------------------------------------------------------------------------------------------------------------------------------------------------------------------------------------------------------------------------------------------------------------------------------------------------------------------------------------------------------------------------------------------------------------------------------------------------------------------------------------------------------------------------------------------------------------------------------------------------------------------|-------------------------------------------------------------------------------------------------------------------------------------------------------------------------------------------------------------------------------------------------------------------------------------------------------------------------------------------------------------------------------------------------------------------------------------------------------------------------------------------------------------------------------------------------------------------------------------------------------------------------------------------------------------------------------------------------------------------------------------------------------------------------------------------------------------------------------------------------------------------------------------------------------------------------------------------------------------------------------------------------------------------------------------------------------------------------------------------------------------------------------------------------------------------------------------------------------------------------------------------------------------------------------------------------------------------------------------------------------------------------------------------------------------------------------------------------------------------------------------------------------------------------------------------------------------------------------------------------------------------------------------------------------------------------------------------------------------------------------------------------------------------------------------------------------------------------------------------------------------------------------------------------------------------------------------------------------------------------------------------------------------------------------------------------------------------------------------------------------------------------------------------------------------------------------------------------------------------------------------------------------------------------------------------------------------------------------------|-----------------------------------------------------------------------------------------------------------------------------------------------------------------------------------------------------------------------------------------------------------------------------------------------------------------------------------------------------------------------------------------------------------------------------------------------------------------------------------------------------------------------------------------------------------------------------------------------------------------------------------------------------------------------------------------------------------------------------------------------------------------------------------------------------------------------------------------------------------------------------------------------------------------------------------------------------------------------------------------------------------------------------------------------------------------------------------------------------------------------------------------------------------------------------------------------------------------------------------------------------------------------------------------------------------------------------------------------------------------------------------------------------------------------------------------------------------------------------------------------------------------------------------------------------------------------------------------------------------------------------------------------------------------------------------------------------------------------------------------------------------------------------------------------------------------------------------------------------------------------------------------------------------------------------------------------------------------------------------------------------------------------------------------------------------------------------------------------------------------------------------------------------------------------------------------------------------------------------------------------------------------------------------------|
| <p><b>Q48</b></p> | <p>PD-L1 (programmed death-ligand 1) is a protein that helps cancer cells evade the immune system. When PD-L1 binds to PD-1, a receptor on T cells, it sends a signal that tells the T cells to stop attacking the cancer cells.</p> <p>In patients with non-small cell lung cancer (NSCLC), high levels of PD-L1 expression on tumor cells are associated with a worse prognosis. This is because high levels of PD-L1 expression can make it more difficult for the immune system to fight the cancer.</p> <p>However, not all patients with NSCLC who have high levels of PD-L1 expression will have a poor prognosis. Some patients may still benefit from immunotherapy, which works by blocking the PD-1/PD-L1 pathway.</p> <p>Overall, PD-L1 status is a useful prognostic marker for NSCLC, but it is not the only factor that determines a patient's prognosis. Other factors, such as the stage of the cancer, the patient's age and overall health, and the type of treatment they receive, also play a role.</p> <p>Here are some studies that have looked at the prognostic impact of PD-L1 status in NSCLC:</p> <ul style="list-style-type: none"> <li>* A study published in the <b>New England Journal of Medicine</b> in 2015 found that patients with advanced NSCLC who had high levels of PD-L1 expression on tumor cells had a median survival of 10.2 months, compared to 6.8 months for patients with low levels of PD-L1 expression.</li> <li>* A study published in the <b>Journal of Clinical Oncology</b> in 2016 found that patients with stage IIIB or IV NSCLC who had high levels of PD-L1 expression on tumor cells had a 35% chance of being alive at 2 years, compared to 15% for patients with low levels of PD-L1 expression.</li> <li>* A study published in the <b>Cancer Cell</b> journal in 2017 found that patients with stage IV NSCLC who had high levels of PD-L1 expression on tumor cells and received immunotherapy had a median survival of 21.4 months, compared to 10.1 months for patients who received chemotherapy.</li> </ul> <p>These studies suggest that PD-L1 status is a useful prognostic marker for NSCLC, and that patients with high levels of PD-L1 expression may benefit from immunotherapy. However, more research is needed to confirm these findings and to determine the best way to use PD-L1 status to guide treatment decisions.</p> | <p>PD-L1 (programmed death-ligand 1) is a protein that helps cancer cells evade the immune system. When PD-L1 binds to PD-1, a receptor on T cells, it sends a signal that tells the T cells to stop attacking the cancer cells.</p> <p>In patients with non-small cell lung cancer (NSCLC), high levels of PD-L1 expression on tumor cells are associated with a <b>worse prognosis</b>. This is because high levels of PD-L1 expression can make it more difficult for the immune system to fight the cancer.</p> <p>However, not all patients with NSCLC who have high levels of PD-L1 expression will have a poor prognosis. Some patients may still benefit from immunotherapy, which works by blocking the PD-1/PD-L1 pathway.</p> <p>Overall, PD-L1 status is a <b>useful prognostic marker</b> for NSCLC, but it is not the only factor that determines a patient's prognosis. Other factors, such as the stage of the cancer, the patient's age and overall health, and the type of treatment they receive, also play a role.</p> <p>Here are some studies that have looked at the prognostic impact of PD-L1 status in NSCLC:</p> <ul style="list-style-type: none"> <li>* A study published in the <b>New England Journal of Medicine</b> in 2015 found that patients with advanced NSCLC who had high levels of PD-L1 expression on tumor cells had a median survival of <b>10.2 months</b>, compared to <b>6.8 months</b> for patients with low levels of PD-L1 expression.</li> <li>* A study published in the <b>Journal of Clinical Oncology</b> in 2016 found that patients with stage IIIB or IV NSCLC who had high levels of PD-L1 expression on tumor cells had a <b>35% chance of being alive at 2 years</b>, compared to <b>15%</b> for patients with low levels of PD-L1 expression.</li> <li>* A study published in the <b>Cancer Cell</b> journal in 2017 found that patients with stage IV NSCLC who had high levels of PD-L1 expression on tumor cells and received immunotherapy had a median survival of <b>21.4 months</b>, compared to <b>10.1 months</b> for patients who received chemotherapy.</li> </ul> <p>These studies suggest that PD-L1 status is a useful prognostic marker for NSCLC, and that patients with high levels of PD-L1 expression may benefit from immunotherapy. However,</p> | <p>PD-L1 (programmed death ligand-1) is a protein that is expressed on some cancer cells and on some immune cells. When PD-L1 binds to PD-1, a receptor on T cells, it sends a signal that tells the T cells to stop attacking the cancer cells. This allows the cancer cells to evade the immune system and grow.</p> <p>In patients with non-small cell lung cancer (NSCLC), high levels of PD-L1 expression on tumor cells are associated with a <b>worse prognosis</b>. This is because high levels of PD-L1 expression can make it more difficult for the immune system to fight the cancer.</p> <p>However, not all patients with NSCLC who have high levels of PD-L1 expression will have a poor prognosis. Some patients may still benefit from immunotherapy, which works by blocking the PD-1/PD-L1 pathway and allowing the immune system to attack the cancer cells.</p> <p>Overall, PD-L1 status is a <b>useful prognostic marker</b> for NSCLC, but it is not the only factor that determines a patient's prognosis. Other factors, such as the stage of the cancer, the patient's age and overall health, and the type of treatment they receive, also play a role.</p> <p>Here are some studies that have looked at the prognostic impact of PD-L1 status in NSCLC:</p> <ul style="list-style-type: none"> <li>* A study published in the <b>New England Journal of Medicine</b> in 2015 found that patients with advanced NSCLC who had high levels of PD-L1 expression on tumor cells had a median survival of <b>10.2 months</b>, compared to <b>6.8 months</b> for patients with low levels of PD-L1 expression.</li> <li>* A study published in the <b>Journal of Clinical Oncology</b> in 2016 found that patients with stage IIIB or IV NSCLC who had high levels of PD-L1 expression on tumor cells had a <b>35% chance of being alive at 2 years</b>, compared to <b>15%</b> for patients with low levels of PD-L1 expression.</li> <li>* A study published in the <b>Cancer Cell</b> journal in 2017 found that patients with stage IV NSCLC who had high levels of PD-L1 expression on tumor cells and received immunotherapy had a median survival of <b>21.4 months</b>, compared to <b>10.1 months</b> for patients who received chemotherapy.</li> </ul> |
|-------------------|---------------------------------------------------------------------------------------------------------------------------------------------------------------------------------------------------------------------------------------------------------------------------------------------------------------------------------------------------------------------------------------------------------------------------------------------------------------------------------------------------------------------------------------------------------------------------------------------------------------------------------------------------------------------------------------------------------------------------------------------------------------------------------------------------------------------------------------------------------------------------------------------------------------------------------------------------------------------------------------------------------------------------------------------------------------------------------------------------------------------------------------------------------------------------------------------------------------------------------------------------------------------------------------------------------------------------------------------------------------------------------------------------------------------------------------------------------------------------------------------------------------------------------------------------------------------------------------------------------------------------------------------------------------------------------------------------------------------------------------------------------------------------------------------------------------------------------------------------------------------------------------------------------------------------------------------------------------------------------------------------------------------------------------------------------------------------------------------------------------------------------------------------------------------------------------------------------------------------------------------------------------------------------------------------------------------------------------------------------------------------------------------------------------|-------------------------------------------------------------------------------------------------------------------------------------------------------------------------------------------------------------------------------------------------------------------------------------------------------------------------------------------------------------------------------------------------------------------------------------------------------------------------------------------------------------------------------------------------------------------------------------------------------------------------------------------------------------------------------------------------------------------------------------------------------------------------------------------------------------------------------------------------------------------------------------------------------------------------------------------------------------------------------------------------------------------------------------------------------------------------------------------------------------------------------------------------------------------------------------------------------------------------------------------------------------------------------------------------------------------------------------------------------------------------------------------------------------------------------------------------------------------------------------------------------------------------------------------------------------------------------------------------------------------------------------------------------------------------------------------------------------------------------------------------------------------------------------------------------------------------------------------------------------------------------------------------------------------------------------------------------------------------------------------------------------------------------------------------------------------------------------------------------------------------------------------------------------------------------------------------------------------------------------------------------------------------------------------------------------------------------------|-----------------------------------------------------------------------------------------------------------------------------------------------------------------------------------------------------------------------------------------------------------------------------------------------------------------------------------------------------------------------------------------------------------------------------------------------------------------------------------------------------------------------------------------------------------------------------------------------------------------------------------------------------------------------------------------------------------------------------------------------------------------------------------------------------------------------------------------------------------------------------------------------------------------------------------------------------------------------------------------------------------------------------------------------------------------------------------------------------------------------------------------------------------------------------------------------------------------------------------------------------------------------------------------------------------------------------------------------------------------------------------------------------------------------------------------------------------------------------------------------------------------------------------------------------------------------------------------------------------------------------------------------------------------------------------------------------------------------------------------------------------------------------------------------------------------------------------------------------------------------------------------------------------------------------------------------------------------------------------------------------------------------------------------------------------------------------------------------------------------------------------------------------------------------------------------------------------------------------------------------------------------------------------------|

|  |  |                                                                                                                                                                                                                                                                                                                                                                                                                                                                                                                                                                                                                                                                                                                                                                                                                                                                                                                                                                                                                                                                                                                                                                                                                                                         |                                                                                                                                                                                                                                                                                                                                                                                                                                                                                                                                                                                                                                                                                                                                                                                                                                                                                                                                                                                                                                                                                                                                                                                                                                                                                                                                                                                                                                          |
|--|--|---------------------------------------------------------------------------------------------------------------------------------------------------------------------------------------------------------------------------------------------------------------------------------------------------------------------------------------------------------------------------------------------------------------------------------------------------------------------------------------------------------------------------------------------------------------------------------------------------------------------------------------------------------------------------------------------------------------------------------------------------------------------------------------------------------------------------------------------------------------------------------------------------------------------------------------------------------------------------------------------------------------------------------------------------------------------------------------------------------------------------------------------------------------------------------------------------------------------------------------------------------|------------------------------------------------------------------------------------------------------------------------------------------------------------------------------------------------------------------------------------------------------------------------------------------------------------------------------------------------------------------------------------------------------------------------------------------------------------------------------------------------------------------------------------------------------------------------------------------------------------------------------------------------------------------------------------------------------------------------------------------------------------------------------------------------------------------------------------------------------------------------------------------------------------------------------------------------------------------------------------------------------------------------------------------------------------------------------------------------------------------------------------------------------------------------------------------------------------------------------------------------------------------------------------------------------------------------------------------------------------------------------------------------------------------------------------------|
|  |  | <p>more research is needed to confirm these findings and to determine the best way to use PD-L1 status to guide treatment decisions.</p> <p>Here are some additional things to keep in mind about PD-L1 status and prognosis in NSCLC:</p> <ul style="list-style-type: none"> <li>* The prognostic impact of PD-L1 status may vary depending on the type of NSCLC. For example, PD-L1 status may be more prognostically significant in patients with squamous cell lung cancer than in patients with adenocarcinoma.</li> <li>* The prognostic impact of PD-L1 status may also vary depending on the stage of the cancer. For example, PD-L1 status may be more prognostically significant in patients with advanced NSCLC than in patients with early-stage NSCLC.</li> <li>* The prognostic impact of PD-L1 status may also vary depending on the patient's overall health. For example, patients with poor overall health may not benefit from immunotherapy as much as patients with good overall health.</li> </ul> <p>If you have been diagnosed with NSCLC, your doctor will discuss your PD-L1 status with you and how it may affect your prognosis. They will also discuss your treatment options and which treatment may be best for you.</p> | <p>These studies suggest that PD-L1 status is a useful prognostic marker for NSCLC, and that patients with high levels of PD-L1 expression may benefit from immunotherapy. However, more research is needed to confirm these findings and to determine the best way to use PD-L1 status to guide treatment decisions.</p> <p>Here are some additional things to keep in mind about PD-L1 status and prognosis in NSCLC:</p> <ul style="list-style-type: none"> <li>* The prognostic impact of PD-L1 status may vary depending on the type of NSCLC. For example, PD-L1 status may be more prognostically significant in patients with squamous cell lung cancer than in patients with adenocarcinoma.</li> <li>* The prognostic impact of PD-L1 status may also vary depending on the stage of the cancer. For example, PD-L1 status may be more prognostically significant in patients with advanced NSCLC than in patients with early-stage NSCLC.</li> <li>* The prognostic impact of PD-L1 status may also vary depending on the patient's overall health. For example, patients with poor overall health may not benefit from immunotherapy as much as patients with good overall health.</li> </ul> <p>If you have been diagnosed with NSCLC, your doctor will discuss your PD-L1 status with you and how it may affect your prognosis. They will also discuss your treatment options and which treatment may be best for you.</p> |
|--|--|---------------------------------------------------------------------------------------------------------------------------------------------------------------------------------------------------------------------------------------------------------------------------------------------------------------------------------------------------------------------------------------------------------------------------------------------------------------------------------------------------------------------------------------------------------------------------------------------------------------------------------------------------------------------------------------------------------------------------------------------------------------------------------------------------------------------------------------------------------------------------------------------------------------------------------------------------------------------------------------------------------------------------------------------------------------------------------------------------------------------------------------------------------------------------------------------------------------------------------------------------------|------------------------------------------------------------------------------------------------------------------------------------------------------------------------------------------------------------------------------------------------------------------------------------------------------------------------------------------------------------------------------------------------------------------------------------------------------------------------------------------------------------------------------------------------------------------------------------------------------------------------------------------------------------------------------------------------------------------------------------------------------------------------------------------------------------------------------------------------------------------------------------------------------------------------------------------------------------------------------------------------------------------------------------------------------------------------------------------------------------------------------------------------------------------------------------------------------------------------------------------------------------------------------------------------------------------------------------------------------------------------------------------------------------------------------------------|

|                   |                                                                                                                                                                                                                                                                                                                                                                                                                                                                                                                                                                                                                                                                                                                                                                                                                                                                                                                                                                                                                                                                                                                                                                                                                                                                                                                                                                                                                                                                                                                                                                                                                                                                                                                                                                                                                                                                                                                      |                                                                                                                                                                                                                                                                                                                                                                                                                                                                                                                                                                                                                                                                                                                                                                                                                                                                                                                                                                                                                                                                                                                                                                                                                                                                                                                                                                                                                                                                                                                                                                                                                                                                                                                                                                                                                                                                                                                                                                                                                                                                                                                                                                                                                                 |                                                                                                                                                                                                                                                                                                                                                                                                                                                                                                                                                                                                                                                                                                                                                                                                                                                                                                                                                                                                                                                                                                                                                                                                                                                                                                                                                                                                                                                                                                                                                                                                                                                                                                                                                                                                                                                                                                                                                                                                                                                              |
|-------------------|----------------------------------------------------------------------------------------------------------------------------------------------------------------------------------------------------------------------------------------------------------------------------------------------------------------------------------------------------------------------------------------------------------------------------------------------------------------------------------------------------------------------------------------------------------------------------------------------------------------------------------------------------------------------------------------------------------------------------------------------------------------------------------------------------------------------------------------------------------------------------------------------------------------------------------------------------------------------------------------------------------------------------------------------------------------------------------------------------------------------------------------------------------------------------------------------------------------------------------------------------------------------------------------------------------------------------------------------------------------------------------------------------------------------------------------------------------------------------------------------------------------------------------------------------------------------------------------------------------------------------------------------------------------------------------------------------------------------------------------------------------------------------------------------------------------------------------------------------------------------------------------------------------------------|---------------------------------------------------------------------------------------------------------------------------------------------------------------------------------------------------------------------------------------------------------------------------------------------------------------------------------------------------------------------------------------------------------------------------------------------------------------------------------------------------------------------------------------------------------------------------------------------------------------------------------------------------------------------------------------------------------------------------------------------------------------------------------------------------------------------------------------------------------------------------------------------------------------------------------------------------------------------------------------------------------------------------------------------------------------------------------------------------------------------------------------------------------------------------------------------------------------------------------------------------------------------------------------------------------------------------------------------------------------------------------------------------------------------------------------------------------------------------------------------------------------------------------------------------------------------------------------------------------------------------------------------------------------------------------------------------------------------------------------------------------------------------------------------------------------------------------------------------------------------------------------------------------------------------------------------------------------------------------------------------------------------------------------------------------------------------------------------------------------------------------------------------------------------------------------------------------------------------------|--------------------------------------------------------------------------------------------------------------------------------------------------------------------------------------------------------------------------------------------------------------------------------------------------------------------------------------------------------------------------------------------------------------------------------------------------------------------------------------------------------------------------------------------------------------------------------------------------------------------------------------------------------------------------------------------------------------------------------------------------------------------------------------------------------------------------------------------------------------------------------------------------------------------------------------------------------------------------------------------------------------------------------------------------------------------------------------------------------------------------------------------------------------------------------------------------------------------------------------------------------------------------------------------------------------------------------------------------------------------------------------------------------------------------------------------------------------------------------------------------------------------------------------------------------------------------------------------------------------------------------------------------------------------------------------------------------------------------------------------------------------------------------------------------------------------------------------------------------------------------------------------------------------------------------------------------------------------------------------------------------------------------------------------------------------|
| <p><b>Q49</b></p> | <p>Tumor mutational burden (TMB) is the total number of mutations in a tumor's DNA. Mutations can make cancer cells more likely to be recognized and attacked by the immune system. Therefore, tumors with high TMB are more likely to respond to immunotherapy, which works by boosting the immune system's ability to fight cancer.</p> <p>A number of studies have shown that patients with high TMB who receive immunotherapy have better outcomes than patients with low TMB. For example, a study published in the <b>New England Journal of Medicine</b> in 2017 found that patients with advanced melanoma who had high TMB and received pembrolizumab (Keytruda) had a median survival of <b>21.0 months</b>, compared to <b>10.1 months</b> for patients who received chemotherapy.</p> <p>Another study, published in the <b>Journal of Clinical Oncology</b> in 2018, found that patients with advanced colorectal cancer who had high TMB and received pembrolizumab had a median progression-free survival of <b>14.6 months</b>, compared to <b>8.4 months</b> for patients who received chemotherapy.</p> <p>These studies suggest that TMB is a promising biomarker for predicting which patients are most likely to benefit from immunotherapy. However, more research is needed to confirm these findings and to determine the optimal cut-off for TMB in predicting response to immunotherapy.</p> <p>It is important to note that TMB is not the only factor that determines how well a patient will respond to immunotherapy. Other factors, such as the type of cancer, the stage of the cancer, and the patient's overall health, also play a role.</p> <p>If you have been diagnosed with cancer, your doctor will discuss your TMB status with you and how it may affect your treatment options. They will also discuss your overall prognosis and what you can expect from treatment.</p> | <p>Tumor mutational burden (TMB) is a measure of the total number of mutations in a tumor's DNA. Mutations can make cancer cells more likely to be recognized and attacked by the immune system. Therefore, tumors with high TMB are more likely to respond to immunotherapy, which works by boosting the immune system's ability to fight cancer.</p> <p>A number of studies have shown that patients with high TMB who receive immunotherapy have better outcomes than patients with low TMB. For example, a study published in the <b>New England Journal of Medicine</b> in 2017 found that patients with advanced melanoma who had high TMB and received pembrolizumab (Keytruda) had a median survival of <b>21.0 months</b>, compared to <b>10.1 months</b> for patients who received chemotherapy.</p> <p>Another study, published in the <b>Journal of Clinical Oncology</b> in 2018, found that patients with advanced colorectal cancer who had high TMB and received pembrolizumab had a median progression-free survival of <b>14.6 months</b>, compared to <b>8.4 months</b> for patients who received chemotherapy.</p> <p>These studies suggest that TMB is a promising biomarker for predicting which patients are most likely to benefit from immunotherapy. However, more research is needed to confirm these findings and to determine the optimal cut-off for TMB in predicting response to immunotherapy.</p> <p>It is important to note that TMB is not the only factor that determines how well a patient will respond to immunotherapy. Other factors, such as the type of cancer, the stage of the cancer, and the patient's overall health, also play a role.</p> <p>If you have been diagnosed with cancer, your doctor will discuss your TMB status with you and how it may affect your treatment options. They will also discuss your overall prognosis and what you can expect from treatment.</p> <p>Here are some additional things to keep in mind about TMB and prognosis in patients receiving immunotherapy:</p> <p>* The prognostic impact of TMB may vary depending on the type of cancer. For example, TMB may be more prognostically significant in patients with melanoma than in</p> | <p><b>Tumor mutational burden (TMB)</b> is a measure of the total number of mutations in a tumor's DNA. Mutations can make cancer cells more likely to be recognized and attacked by the immune system. Therefore, tumors with high TMB are more likely to respond to immunotherapy, which works by boosting the immune system's ability to fight cancer.</p> <p>A number of studies have shown that patients with high TMB who receive immunotherapy have better outcomes than patients with low TMB. For example, a study published in the <b>New England Journal of Medicine</b> in 2017 found that patients with advanced melanoma who had high TMB and received pembrolizumab (Keytruda) had a median survival of <b>21.0 months</b>, compared to <b>10.1 months</b> for patients who received chemotherapy.</p> <p>Another study, published in the <b>Journal of Clinical Oncology</b> in 2018, found that patients with advanced colorectal cancer who had high TMB and received pembrolizumab had a median progression-free survival of <b>14.6 months</b>, compared to <b>8.4 months</b> for patients who received chemotherapy.</p> <p>These studies suggest that TMB is a promising biomarker for predicting which patients are most likely to benefit from immunotherapy. However, more research is needed to confirm these findings and to determine the optimal cut-off for TMB in predicting response to immunotherapy.</p> <p>It is important to note that TMB is not the only factor that determines how well a patient will respond to immunotherapy. Other factors, such as the type of cancer, the stage of the cancer, and the patient's overall health, also play a role.</p> <p>If you have been diagnosed with cancer, your doctor will discuss your TMB status with you and how it may affect your treatment options. They will also discuss your overall prognosis and what you can expect from treatment.</p> <p>Here are some additional things to keep in mind about TMB and prognosis in patients receiving immunotherapy:</p> |
|-------------------|----------------------------------------------------------------------------------------------------------------------------------------------------------------------------------------------------------------------------------------------------------------------------------------------------------------------------------------------------------------------------------------------------------------------------------------------------------------------------------------------------------------------------------------------------------------------------------------------------------------------------------------------------------------------------------------------------------------------------------------------------------------------------------------------------------------------------------------------------------------------------------------------------------------------------------------------------------------------------------------------------------------------------------------------------------------------------------------------------------------------------------------------------------------------------------------------------------------------------------------------------------------------------------------------------------------------------------------------------------------------------------------------------------------------------------------------------------------------------------------------------------------------------------------------------------------------------------------------------------------------------------------------------------------------------------------------------------------------------------------------------------------------------------------------------------------------------------------------------------------------------------------------------------------------|---------------------------------------------------------------------------------------------------------------------------------------------------------------------------------------------------------------------------------------------------------------------------------------------------------------------------------------------------------------------------------------------------------------------------------------------------------------------------------------------------------------------------------------------------------------------------------------------------------------------------------------------------------------------------------------------------------------------------------------------------------------------------------------------------------------------------------------------------------------------------------------------------------------------------------------------------------------------------------------------------------------------------------------------------------------------------------------------------------------------------------------------------------------------------------------------------------------------------------------------------------------------------------------------------------------------------------------------------------------------------------------------------------------------------------------------------------------------------------------------------------------------------------------------------------------------------------------------------------------------------------------------------------------------------------------------------------------------------------------------------------------------------------------------------------------------------------------------------------------------------------------------------------------------------------------------------------------------------------------------------------------------------------------------------------------------------------------------------------------------------------------------------------------------------------------------------------------------------------|--------------------------------------------------------------------------------------------------------------------------------------------------------------------------------------------------------------------------------------------------------------------------------------------------------------------------------------------------------------------------------------------------------------------------------------------------------------------------------------------------------------------------------------------------------------------------------------------------------------------------------------------------------------------------------------------------------------------------------------------------------------------------------------------------------------------------------------------------------------------------------------------------------------------------------------------------------------------------------------------------------------------------------------------------------------------------------------------------------------------------------------------------------------------------------------------------------------------------------------------------------------------------------------------------------------------------------------------------------------------------------------------------------------------------------------------------------------------------------------------------------------------------------------------------------------------------------------------------------------------------------------------------------------------------------------------------------------------------------------------------------------------------------------------------------------------------------------------------------------------------------------------------------------------------------------------------------------------------------------------------------------------------------------------------------------|

|     |                                                                                                |                                                                                                                                                                                                                                                                                                                                                                                                                                                                                                                                                                                                                                                                                                                                                                                                                       |                                                                                                                                                                                                                                                                                                                                                                                                                                                                                                                                                                                                                                                                                                                                                                                                                                                                                                                                                                                            |
|-----|------------------------------------------------------------------------------------------------|-----------------------------------------------------------------------------------------------------------------------------------------------------------------------------------------------------------------------------------------------------------------------------------------------------------------------------------------------------------------------------------------------------------------------------------------------------------------------------------------------------------------------------------------------------------------------------------------------------------------------------------------------------------------------------------------------------------------------------------------------------------------------------------------------------------------------|--------------------------------------------------------------------------------------------------------------------------------------------------------------------------------------------------------------------------------------------------------------------------------------------------------------------------------------------------------------------------------------------------------------------------------------------------------------------------------------------------------------------------------------------------------------------------------------------------------------------------------------------------------------------------------------------------------------------------------------------------------------------------------------------------------------------------------------------------------------------------------------------------------------------------------------------------------------------------------------------|
|     |                                                                                                | <p>patients with lung cancer.</p> <ul style="list-style-type: none"> <li>* The prognostic impact of TMB may also vary depending on the stage of the cancer. For example, TMB may be more prognostically significant in patients with advanced cancer than in patients with early-stage cancer.</li> <li>* The prognostic impact of TMB may also vary depending on the patient's overall health. For example, patients with poor overall health may not benefit from immunotherapy as much as patients with good overall health.</li> </ul> <p>Overall, TMB is a promising biomarker for predicting which patients are most likely to benefit from immunotherapy. However, more research is needed to confirm these findings and to determine the optimal cut-off for TMB in predicting response to immunotherapy.</p> | <ul style="list-style-type: none"> <li>* The prognostic impact of TMB may vary depending on the type of cancer. For example, TMB may be more prognostically significant in patients with melanoma than in patients with lung cancer.</li> <li>* The prognostic impact of TMB may also vary depending on the stage of the cancer. For example, TMB may be more prognostically significant in patients with advanced cancer than in patients with early-stage cancer.</li> <li>* The prognostic impact of TMB may also vary depending on the patient's overall health. For example, patients with poor overall health may not benefit from immunotherapy as much as patients with good overall health.</li> </ul> <p>Overall, TMB is a promising biomarker for predicting which patients are most likely to benefit from immunotherapy. However, more research is needed to confirm these findings and to determine the optimal cut-off for TMB in predicting response to immunotherapy.</p> |
| Q50 | The response rate of B-cell acute lymphoblastic leukaemia to tisagenleucel is <b>**81%**</b> . | <b>**81%**</b> of patients with B-cell acute lymphoblastic leukaemia respond to tisagenleucel.                                                                                                                                                                                                                                                                                                                                                                                                                                                                                                                                                                                                                                                                                                                        | The response rate of B-cell acute lymphoblastic leukaemia (B-ALL) to tisagenleucel (Kymriah) is 81%.                                                                                                                                                                                                                                                                                                                                                                                                                                                                                                                                                                                                                                                                                                                                                                                                                                                                                       |

|                   |                                                                                                                                                                                                                                                                                                                                                                                                                                                                                                                                                                                                                                                                                                                                                                                                                                                                                                                                                                                                                                                                                                                                                                                                                                                                                                                                                                                                                                                                                                                                                 |                                                                                                                                                                                                                                                                                                                                                                                                                                                                                                                                                                                                                                                                                                                                                                                                                                                                                                                                                                                                                                                                                                                                                                                                                                                                                                                                                                                                                                                                                                                                                                                                                                                                                                                                                                                                                                                                                                                                                                                                                                                                                                                                                                                                                                                                                                                                                                                                                                                                                                   |                                                                                                                                                                                                                                                                                                                                                                                                                                                                                                                                                                                                                                                                                                                                                                                                                                                                                                                                                                                                                                                                                                                                                                                                                                                                                                                                                                                                                                                                                                                                                                                                                                                                                                                                                                                                                                                                                                                                                                                                                                                                                                                                                                                                                                                                                                                                                                                                                                                                                          |
|-------------------|-------------------------------------------------------------------------------------------------------------------------------------------------------------------------------------------------------------------------------------------------------------------------------------------------------------------------------------------------------------------------------------------------------------------------------------------------------------------------------------------------------------------------------------------------------------------------------------------------------------------------------------------------------------------------------------------------------------------------------------------------------------------------------------------------------------------------------------------------------------------------------------------------------------------------------------------------------------------------------------------------------------------------------------------------------------------------------------------------------------------------------------------------------------------------------------------------------------------------------------------------------------------------------------------------------------------------------------------------------------------------------------------------------------------------------------------------------------------------------------------------------------------------------------------------|---------------------------------------------------------------------------------------------------------------------------------------------------------------------------------------------------------------------------------------------------------------------------------------------------------------------------------------------------------------------------------------------------------------------------------------------------------------------------------------------------------------------------------------------------------------------------------------------------------------------------------------------------------------------------------------------------------------------------------------------------------------------------------------------------------------------------------------------------------------------------------------------------------------------------------------------------------------------------------------------------------------------------------------------------------------------------------------------------------------------------------------------------------------------------------------------------------------------------------------------------------------------------------------------------------------------------------------------------------------------------------------------------------------------------------------------------------------------------------------------------------------------------------------------------------------------------------------------------------------------------------------------------------------------------------------------------------------------------------------------------------------------------------------------------------------------------------------------------------------------------------------------------------------------------------------------------------------------------------------------------------------------------------------------------------------------------------------------------------------------------------------------------------------------------------------------------------------------------------------------------------------------------------------------------------------------------------------------------------------------------------------------------------------------------------------------------------------------------------------------------|------------------------------------------------------------------------------------------------------------------------------------------------------------------------------------------------------------------------------------------------------------------------------------------------------------------------------------------------------------------------------------------------------------------------------------------------------------------------------------------------------------------------------------------------------------------------------------------------------------------------------------------------------------------------------------------------------------------------------------------------------------------------------------------------------------------------------------------------------------------------------------------------------------------------------------------------------------------------------------------------------------------------------------------------------------------------------------------------------------------------------------------------------------------------------------------------------------------------------------------------------------------------------------------------------------------------------------------------------------------------------------------------------------------------------------------------------------------------------------------------------------------------------------------------------------------------------------------------------------------------------------------------------------------------------------------------------------------------------------------------------------------------------------------------------------------------------------------------------------------------------------------------------------------------------------------------------------------------------------------------------------------------------------------------------------------------------------------------------------------------------------------------------------------------------------------------------------------------------------------------------------------------------------------------------------------------------------------------------------------------------------------------------------------------------------------------------------------------------------------|
| <p><b>Q51</b></p> | <p>Pembrolizumab is a type of immunotherapy that works by blocking the interaction between PD-1 and PD-L1 proteins. PD-1 is a protein on T cells, while PD-L1 is a protein on cancer cells. When PD-1 binds to PD-L1, it sends a signal to the T cell to stop attacking the cancer cell. Pembrolizumab blocks this interaction, allowing the T cells to attack the cancer cells.</p> <p>Hypothyroidism and mild colitis are both immune-related adverse events (irAEs) that can occur in patients receiving pembrolizumab. Hypothyroidism is a condition in which the thyroid gland does not produce enough thyroid hormone. Mild colitis is an inflammation of the colon.</p> <p>In general, irAEs are not considered to have a significant impact on prognosis in patients receiving immunotherapy. However, some irAEs, such as severe colitis, can be life-threatening. If a patient develops an irAE, their doctor will monitor them closely and may adjust their treatment plan as needed.</p> <p>In the case of the patient receiving pembrolizumab for kidney cancer who develops hypothyroidism and mild colitis, it is unlikely that these irAEs will have a significant impact on their prognosis. However, their doctor will continue to monitor them closely and may adjust their treatment plan as needed.</p> <p>It is important to note that I am not a medical expert and this information should not be taken as medical advice. If you have any questions or concerns about your treatment, please speak to your doctor.</p> | <p>The development of hypothyroidism and mild colitis in a patient receiving pembrolizumab for kidney cancer is not likely to have a significant impact on their prognosis. However, it is important to monitor these conditions closely and to adjust the treatment plan as needed.</p> <p>Hypothyroidism is a condition in which the thyroid gland does not produce enough thyroid hormone. This can lead to a variety of symptoms, including fatigue, weight gain, and hair loss. Mild colitis is an inflammation of the colon. This can cause symptoms such as diarrhea, abdominal pain, and blood in the stool.</p> <p>Both hypothyroidism and mild colitis are immune-related adverse events (irAEs) that can occur in patients receiving pembrolizumab. irAEs are side effects that are caused by the body's immune system responding to the medication. irAEs can occur in any part of the body and can range in severity from mild to life-threatening.</p> <p>In general, irAEs are not considered to have a significant impact on prognosis in patients receiving immunotherapy. However, some irAEs, such as severe colitis, can be life-threatening. If a patient develops an irAE, their doctor will monitor them closely and may adjust their treatment plan as needed.</p> <p>In the case of the patient receiving pembrolizumab for kidney cancer who develops hypothyroidism and mild colitis, it is unlikely that these irAEs will have a significant impact on their prognosis. However, their doctor will continue to monitor them closely and may adjust their treatment plan as needed.</p> <p>Here are some additional things to keep in mind about hypothyroidism and mild colitis in patients receiving pembrolizumab:</p> <ul style="list-style-type: none"> <li>* Hypothyroidism can be treated with medication. The patient will need to take thyroid hormone replacement therapy for the rest of their life.</li> <li>* Mild colitis can usually be managed with medication. In some cases, the patient may need to make dietary changes or take antibiotics.</li> <li>* If a patient develops severe colitis, they may need to stop taking pembrolizumab. In some cases, the patient may need surgery to remove part of their colon.</li> </ul> <p>It is important to note that I am not a medical expert and this information should not be taken as medical advice. If you have any questions or concerns about your treatment, please speak to your doctor.</p> | <p>In general, the prognosis of a patient with kidney cancer who develops hypothyroidism and mild colitis while receiving pembrolizumab is not significantly impacted. However, it is important to monitor these conditions closely and to adjust the treatment plan as needed.</p> <p>Hypothyroidism is a condition in which the thyroid gland does not produce enough thyroid hormone. This can lead to a variety of symptoms, including fatigue, weight gain, and hair loss. Mild colitis is an inflammation of the colon. This can cause symptoms such as diarrhea, abdominal pain, and blood in the stool.</p> <p>Both hypothyroidism and mild colitis are immune-related adverse events (irAEs) that can occur in patients receiving pembrolizumab. irAEs are side effects that are caused by the body's immune system responding to the medication. irAEs can occur in any part of the body and can range in severity from mild to life-threatening.</p> <p>In general, irAEs are not considered to have a significant impact on prognosis in patients receiving immunotherapy. However, some irAEs, such as severe colitis, can be life-threatening. If a patient develops an irAE, their doctor will monitor them closely and may adjust the treatment plan as needed.</p> <p>In the case of the patient receiving pembrolizumab for kidney cancer who develops hypothyroidism and mild colitis, it is unlikely that these irAEs will have a significant impact on their prognosis. However, their doctor will continue to monitor them closely and may adjust the treatment plan as needed.</p> <p>Here are some additional things to keep in mind about hypothyroidism and mild colitis in patients receiving pembrolizumab:</p> <ul style="list-style-type: none"> <li>* Hypothyroidism can be treated with medication. The patient will need to take thyroid hormone replacement therapy for the rest of their life.</li> <li>* Mild colitis can usually be managed with medication. In some cases, the patient may need to make dietary changes or take antibiotics.</li> <li>* If a patient develops severe colitis, they may need to stop taking pembrolizumab. In some cases, the patient may need surgery to remove part of their colon.</li> </ul> <p>It is important to note that I am not a medical expert and this information should not be taken as medical advice. If you have any questions or concerns about your treatment, please speak to your doctor.</p> |
|-------------------|-------------------------------------------------------------------------------------------------------------------------------------------------------------------------------------------------------------------------------------------------------------------------------------------------------------------------------------------------------------------------------------------------------------------------------------------------------------------------------------------------------------------------------------------------------------------------------------------------------------------------------------------------------------------------------------------------------------------------------------------------------------------------------------------------------------------------------------------------------------------------------------------------------------------------------------------------------------------------------------------------------------------------------------------------------------------------------------------------------------------------------------------------------------------------------------------------------------------------------------------------------------------------------------------------------------------------------------------------------------------------------------------------------------------------------------------------------------------------------------------------------------------------------------------------|---------------------------------------------------------------------------------------------------------------------------------------------------------------------------------------------------------------------------------------------------------------------------------------------------------------------------------------------------------------------------------------------------------------------------------------------------------------------------------------------------------------------------------------------------------------------------------------------------------------------------------------------------------------------------------------------------------------------------------------------------------------------------------------------------------------------------------------------------------------------------------------------------------------------------------------------------------------------------------------------------------------------------------------------------------------------------------------------------------------------------------------------------------------------------------------------------------------------------------------------------------------------------------------------------------------------------------------------------------------------------------------------------------------------------------------------------------------------------------------------------------------------------------------------------------------------------------------------------------------------------------------------------------------------------------------------------------------------------------------------------------------------------------------------------------------------------------------------------------------------------------------------------------------------------------------------------------------------------------------------------------------------------------------------------------------------------------------------------------------------------------------------------------------------------------------------------------------------------------------------------------------------------------------------------------------------------------------------------------------------------------------------------------------------------------------------------------------------------------------------------|------------------------------------------------------------------------------------------------------------------------------------------------------------------------------------------------------------------------------------------------------------------------------------------------------------------------------------------------------------------------------------------------------------------------------------------------------------------------------------------------------------------------------------------------------------------------------------------------------------------------------------------------------------------------------------------------------------------------------------------------------------------------------------------------------------------------------------------------------------------------------------------------------------------------------------------------------------------------------------------------------------------------------------------------------------------------------------------------------------------------------------------------------------------------------------------------------------------------------------------------------------------------------------------------------------------------------------------------------------------------------------------------------------------------------------------------------------------------------------------------------------------------------------------------------------------------------------------------------------------------------------------------------------------------------------------------------------------------------------------------------------------------------------------------------------------------------------------------------------------------------------------------------------------------------------------------------------------------------------------------------------------------------------------------------------------------------------------------------------------------------------------------------------------------------------------------------------------------------------------------------------------------------------------------------------------------------------------------------------------------------------------------------------------------------------------------------------------------------------------|



|                   |                                                                                                                                                                                                                                                                                                                                                                                                                                                                                                                                                                                                                                                                                                                                                                                                                                                                                                                                                                                                                                                                                                                                                                                                                                                                                                                                                                                                                                                                                                                                                                                                                                                                                                                                                               |                                                                                                                                                                                                                                                                                                                                                                                                                                                                                                                                                                                                                                                                                                                                                                                                                                                                                                                                                                                                                                                                                                                                                                                                                                                                                                                                                                                                                                                                                                                                                                                                                                                                                                                                                                                                                                                                                                                                   |                                                                                                                                                                                                                                                                                                                                                                                                                                                                                                                                                                                                                                                                                                                                                                                                                                                                                                                                                                                                                                                                                                                                                                                                                                                                                                                                                                                                                                                                                                                                                                                                                                                                                                                                                                                                                                                                                                                                                                                                                                                                                                                                                                          |
|-------------------|---------------------------------------------------------------------------------------------------------------------------------------------------------------------------------------------------------------------------------------------------------------------------------------------------------------------------------------------------------------------------------------------------------------------------------------------------------------------------------------------------------------------------------------------------------------------------------------------------------------------------------------------------------------------------------------------------------------------------------------------------------------------------------------------------------------------------------------------------------------------------------------------------------------------------------------------------------------------------------------------------------------------------------------------------------------------------------------------------------------------------------------------------------------------------------------------------------------------------------------------------------------------------------------------------------------------------------------------------------------------------------------------------------------------------------------------------------------------------------------------------------------------------------------------------------------------------------------------------------------------------------------------------------------------------------------------------------------------------------------------------------------|-----------------------------------------------------------------------------------------------------------------------------------------------------------------------------------------------------------------------------------------------------------------------------------------------------------------------------------------------------------------------------------------------------------------------------------------------------------------------------------------------------------------------------------------------------------------------------------------------------------------------------------------------------------------------------------------------------------------------------------------------------------------------------------------------------------------------------------------------------------------------------------------------------------------------------------------------------------------------------------------------------------------------------------------------------------------------------------------------------------------------------------------------------------------------------------------------------------------------------------------------------------------------------------------------------------------------------------------------------------------------------------------------------------------------------------------------------------------------------------------------------------------------------------------------------------------------------------------------------------------------------------------------------------------------------------------------------------------------------------------------------------------------------------------------------------------------------------------------------------------------------------------------------------------------------------|--------------------------------------------------------------------------------------------------------------------------------------------------------------------------------------------------------------------------------------------------------------------------------------------------------------------------------------------------------------------------------------------------------------------------------------------------------------------------------------------------------------------------------------------------------------------------------------------------------------------------------------------------------------------------------------------------------------------------------------------------------------------------------------------------------------------------------------------------------------------------------------------------------------------------------------------------------------------------------------------------------------------------------------------------------------------------------------------------------------------------------------------------------------------------------------------------------------------------------------------------------------------------------------------------------------------------------------------------------------------------------------------------------------------------------------------------------------------------------------------------------------------------------------------------------------------------------------------------------------------------------------------------------------------------------------------------------------------------------------------------------------------------------------------------------------------------------------------------------------------------------------------------------------------------------------------------------------------------------------------------------------------------------------------------------------------------------------------------------------------------------------------------------------------------|
| <p><b>Q52</b></p> | <p><b>**BRCA1 and BRCA2**</b> are genes that help repair damaged DNA. Mutations in these genes can increase a person's risk of developing certain types of cancer, including breast, ovarian, and prostate cancer.</p> <p><b>**Immunotherapy**</b> is a type of cancer treatment that uses the body's own immune system to fight cancer. It works by blocking proteins that cancer cells use to evade the immune system.</p> <p><b>**Studies have shown that patients with BRCA1/2 mutations may be more likely to respond to immunotherapy than patients without these mutations.**</b> For example, a study published in the <b>**New England Journal of Medicine**</b> in 2017 found that patients with metastatic breast cancer who had BRCA1 or BRCA2 mutations and received pembrolizumab (Keytruda) had a median overall survival of <b>**25.2 months**</b>, compared to <b>**13.8 months**</b> for patients who received chemotherapy.</p> <p><b>**The reason for this improved response is not fully understood.**</b> However, it is thought that cancer cells with BRCA1/2 mutations may be more likely to express proteins that can be targeted by immunotherapy. Additionally, patients with BRCA1/2 mutations may have a stronger immune response to cancer cells.</p> <p><b>**Overall, the presence of BRCA1/2 mutations is a positive prognostic factor for patients receiving immunotherapy.**</b> This means that patients with these mutations are more likely to respond to treatment and have a better prognosis.</p> <p>It is important to note that I am not a medical expert and this information should not be taken as medical advice. If you have any questions or concerns about your treatment, please speak to your doctor.</p> | <p>BRCA1 and BRCA2 are genes that help repair damaged DNA. Mutations in these genes can increase a person's risk of developing certain types of cancer, including breast, ovarian, and prostate cancer.</p> <p>Immunotherapy is a type of cancer treatment that uses the body's own immune system to fight cancer. It works by blocking proteins that cancer cells use to evade the immune system.</p> <p>Studies have shown that patients with BRCA1/2 mutations may be more likely to respond to immunotherapy than patients without these mutations. For example, a study published in the New England Journal of Medicine in 2017 found that patients with metastatic breast cancer who had BRCA1 or BRCA2 mutations and received pembrolizumab (Keytruda) had a median overall survival of 25.2 months, compared to 13.8 months for patients who received chemotherapy.</p> <p>The reason for this improved response is not fully understood. However, it is thought that cancer cells with BRCA1/2 mutations may be more likely to express proteins that can be targeted by immunotherapy. Additionally, patients with BRCA1/2 mutations may have a stronger immune response to cancer cells.</p> <p>Overall, the presence of BRCA1/2 mutations is a positive prognostic factor for patients receiving immunotherapy. This means that patients with these mutations are more likely to respond to treatment and have a better prognosis.</p> <p>However, it is important to note that not all patients with BRCA1/2 mutations will respond to immunotherapy. Additionally, the response to immunotherapy can vary depending on the type of cancer and the stage of the cancer.</p> <p>If you have been diagnosed with cancer, your doctor will discuss your BRCA1/2 status with you and how it may affect your treatment options. They will also discuss your overall prognosis and what you can expect from treatment.</p> | <p><b>**BRCA1**</b> and <b>**BRCA2**</b> are genes that help repair damaged DNA. Mutations in these genes can increase a person's risk of developing certain types of cancer, including breast, ovarian, and prostate cancer.</p> <p><b>**Immunotherapy**</b> is a type of cancer treatment that uses the body's own immune system to fight cancer. It works by blocking proteins that cancer cells use to evade the immune system.</p> <p>Studies have shown that patients with <b>**BRCA1/2 mutations**</b> may be <b>**more likely to respond to immunotherapy**</b> than patients without these mutations. For example, a study published in the <b>**New England Journal of Medicine**</b> in 2017 found that patients with <b>**metastatic breast cancer**</b> who had <b>**BRCA1 or BRCA2 mutations**</b> and received <b>**pembrolizumab (Keytruda)**</b> had a <b>**median overall survival of 25.2 months**</b>, compared to <b>**13.8 months**</b> for patients who received <b>**chemotherapy**</b>.</p> <p>The reason for this improved response is not fully understood. However, it is thought that cancer cells with <b>**BRCA1/2 mutations**</b> may be <b>**more likely to express proteins that can be targeted by immunotherapy**</b>. Additionally, patients with <b>**BRCA1/2 mutations**</b> may have a <b>**stronger immune response to cancer cells**</b>.</p> <p>Overall, the presence of <b>**BRCA1/2 mutations**</b> is a <b>**positive prognostic factor**</b> for patients receiving immunotherapy. This means that patients with these mutations are more likely to respond to treatment and have a <b>**better prognosis**</b>.</p> <p>However, it is important to note that not all patients with <b>**BRCA1/2 mutations**</b> will respond to immunotherapy. Additionally, the response to immunotherapy can vary depending on the type of cancer and the stage of the cancer.</p> <p>If you have been diagnosed with cancer, your doctor will discuss your <b>**BRCA1/2 status**</b> with you and how it may affect your treatment options. They will also discuss your overall prognosis and what you can expect from treatment.</p> |
|-------------------|---------------------------------------------------------------------------------------------------------------------------------------------------------------------------------------------------------------------------------------------------------------------------------------------------------------------------------------------------------------------------------------------------------------------------------------------------------------------------------------------------------------------------------------------------------------------------------------------------------------------------------------------------------------------------------------------------------------------------------------------------------------------------------------------------------------------------------------------------------------------------------------------------------------------------------------------------------------------------------------------------------------------------------------------------------------------------------------------------------------------------------------------------------------------------------------------------------------------------------------------------------------------------------------------------------------------------------------------------------------------------------------------------------------------------------------------------------------------------------------------------------------------------------------------------------------------------------------------------------------------------------------------------------------------------------------------------------------------------------------------------------------|-----------------------------------------------------------------------------------------------------------------------------------------------------------------------------------------------------------------------------------------------------------------------------------------------------------------------------------------------------------------------------------------------------------------------------------------------------------------------------------------------------------------------------------------------------------------------------------------------------------------------------------------------------------------------------------------------------------------------------------------------------------------------------------------------------------------------------------------------------------------------------------------------------------------------------------------------------------------------------------------------------------------------------------------------------------------------------------------------------------------------------------------------------------------------------------------------------------------------------------------------------------------------------------------------------------------------------------------------------------------------------------------------------------------------------------------------------------------------------------------------------------------------------------------------------------------------------------------------------------------------------------------------------------------------------------------------------------------------------------------------------------------------------------------------------------------------------------------------------------------------------------------------------------------------------------|--------------------------------------------------------------------------------------------------------------------------------------------------------------------------------------------------------------------------------------------------------------------------------------------------------------------------------------------------------------------------------------------------------------------------------------------------------------------------------------------------------------------------------------------------------------------------------------------------------------------------------------------------------------------------------------------------------------------------------------------------------------------------------------------------------------------------------------------------------------------------------------------------------------------------------------------------------------------------------------------------------------------------------------------------------------------------------------------------------------------------------------------------------------------------------------------------------------------------------------------------------------------------------------------------------------------------------------------------------------------------------------------------------------------------------------------------------------------------------------------------------------------------------------------------------------------------------------------------------------------------------------------------------------------------------------------------------------------------------------------------------------------------------------------------------------------------------------------------------------------------------------------------------------------------------------------------------------------------------------------------------------------------------------------------------------------------------------------------------------------------------------------------------------------------|

|                   |                                                                                                                                                                                                                                                                                                                                                                                                                                                                                                                                                                                                                                                                                                                                                                                                                                                                                                                                                                                                                                                                                                                                                                                                                                                                                                                                                                                                                                                                                                                                                                                                                                                                                                                                                                                                                                                                                                                                                                                                                                                                                                           |                                                                                                                                                                                                                                                                                                                                                                                                                                                                                                                                                                                                                                                                                                                                                                                                                                                                                                                                                                                                                                                                                                                                                                                                                                                                                                                                                                                                                                                                                                                                                                                                                                                                                                                                                                                                                                                                                                                                                                                                                                                                                                                                                                                                                                   |                                                                                                                                                                                                                                                                                                                                                                                                                                                                                                                                                                                                                                                                                                                                                                                                                                                                                                                                                                                                                                                                                                                                                                                                                                                                                                                                                                                                                                                                                                                                                                                                                                                                                                                                                                                                                                                                                                                                                                                                                                                                                                          |
|-------------------|-----------------------------------------------------------------------------------------------------------------------------------------------------------------------------------------------------------------------------------------------------------------------------------------------------------------------------------------------------------------------------------------------------------------------------------------------------------------------------------------------------------------------------------------------------------------------------------------------------------------------------------------------------------------------------------------------------------------------------------------------------------------------------------------------------------------------------------------------------------------------------------------------------------------------------------------------------------------------------------------------------------------------------------------------------------------------------------------------------------------------------------------------------------------------------------------------------------------------------------------------------------------------------------------------------------------------------------------------------------------------------------------------------------------------------------------------------------------------------------------------------------------------------------------------------------------------------------------------------------------------------------------------------------------------------------------------------------------------------------------------------------------------------------------------------------------------------------------------------------------------------------------------------------------------------------------------------------------------------------------------------------------------------------------------------------------------------------------------------------|-----------------------------------------------------------------------------------------------------------------------------------------------------------------------------------------------------------------------------------------------------------------------------------------------------------------------------------------------------------------------------------------------------------------------------------------------------------------------------------------------------------------------------------------------------------------------------------------------------------------------------------------------------------------------------------------------------------------------------------------------------------------------------------------------------------------------------------------------------------------------------------------------------------------------------------------------------------------------------------------------------------------------------------------------------------------------------------------------------------------------------------------------------------------------------------------------------------------------------------------------------------------------------------------------------------------------------------------------------------------------------------------------------------------------------------------------------------------------------------------------------------------------------------------------------------------------------------------------------------------------------------------------------------------------------------------------------------------------------------------------------------------------------------------------------------------------------------------------------------------------------------------------------------------------------------------------------------------------------------------------------------------------------------------------------------------------------------------------------------------------------------------------------------------------------------------------------------------------------------|----------------------------------------------------------------------------------------------------------------------------------------------------------------------------------------------------------------------------------------------------------------------------------------------------------------------------------------------------------------------------------------------------------------------------------------------------------------------------------------------------------------------------------------------------------------------------------------------------------------------------------------------------------------------------------------------------------------------------------------------------------------------------------------------------------------------------------------------------------------------------------------------------------------------------------------------------------------------------------------------------------------------------------------------------------------------------------------------------------------------------------------------------------------------------------------------------------------------------------------------------------------------------------------------------------------------------------------------------------------------------------------------------------------------------------------------------------------------------------------------------------------------------------------------------------------------------------------------------------------------------------------------------------------------------------------------------------------------------------------------------------------------------------------------------------------------------------------------------------------------------------------------------------------------------------------------------------------------------------------------------------------------------------------------------------------------------------------------------------|
| <p><b>Q53</b></p> | <p>The likelihood of a patient with a history of metastatic melanoma responding to further immunotherapy after a relapse three years post completion of treatment depends on a number of factors, including the type of immunotherapy used, the patient's overall health, and the extent of the relapse.</p> <p>In general, patients who responded to immunotherapy once are more likely to respond to it again. However, there is no guarantee that a patient will respond to immunotherapy a second time.</p> <p>In the case of the patient with metastatic melanoma, the fact that she responded to immunotherapy once is a positive sign. However, the fact that she relapsed three years after completing treatment suggests that the cancer may have become resistant to the immunotherapy.</p> <p>If the patient is otherwise healthy and the relapse is not extensive, she may still be a good candidate for further immunotherapy. However, her doctor will need to carefully consider all of the factors involved before making a decision about treatment.</p> <p>Here are some additional things to keep in mind about the likelihood of a patient responding to further immunotherapy after a relapse:</p> <ul style="list-style-type: none"> <li>* The type of immunotherapy used: Some types of immunotherapy, such as pembrolizumab (Keytruda), are more likely to be effective in patients who have relapsed after initial treatment.</li> <li>* The patient's overall health: Patients who are in good overall health are more likely to respond to immunotherapy than patients who are frail or have other medical conditions.</li> <li>* The extent of the relapse: Patients whose cancer has relapsed in a limited area are more likely to respond to immunotherapy than patients whose cancer has spread to multiple parts of the body.</li> </ul> <p>If you have been diagnosed with cancer, your doctor will discuss your individual circumstances and prognosis with you. They will also discuss your treatment options, including the possibility of further immunotherapy.</p> | <p>The likelihood of a patient with a history of metastatic melanoma responding to further immunotherapy after a relapse three years post completion of treatment depends on a number of factors, including the type of immunotherapy used, the patient's overall health, and the extent of the relapse.</p> <p>In general, patients who responded to immunotherapy once are more likely to respond to it again. However, there is no guarantee that a patient will respond to immunotherapy a second time.</p> <p>In the case of the patient with metastatic melanoma, the fact that she responded to immunotherapy once is a positive sign. However, the fact that she relapsed three years after completing treatment suggests that the cancer may have become resistant to the immunotherapy.</p> <p>If the patient is otherwise healthy and the relapse is not extensive, she may still be a good candidate for further immunotherapy. However, her doctor will need to carefully consider all of the factors involved before making a decision about treatment.</p> <p>Here are some additional things to keep in mind about the likelihood of a patient responding to further immunotherapy after a relapse:</p> <ul style="list-style-type: none"> <li>* **The type of immunotherapy used:** Some types of immunotherapy, such as pembrolizumab (Keytruda), are more likely to be effective in patients who have relapsed after initial treatment.</li> <li>***The patient's overall health:** Patients who are in good overall health are more likely to respond to immunotherapy than patients who are frail or have other medical conditions.</li> <li>* **The extent of the relapse:** Patients whose cancer has relapsed in a limited area are more likely to respond to immunotherapy than patients whose cancer has spread to multiple parts of the body.</li> <li>* **The patient's tumor mutational burden (TMB):** TMB is a measure of the number of mutations in a tumor's DNA. Tumors with high TMB are more likely to respond to immunotherapy than tumors with low TMB.</li> </ul> <p>If you have been diagnosed with cancer, your doctor will discuss your individual circumstances and prognosis with</p> | <p>The likelihood of a patient with a history of metastatic melanoma responding to further immunotherapy after a relapse three years post completion of treatment depends on a number of factors, including the type of immunotherapy used, the patient's overall health, and the extent of the relapse.</p> <p>In general, patients who responded to immunotherapy once are more likely to respond to it again. However, there is no guarantee that a patient will respond to immunotherapy a second time.</p> <p>In the case of the patient with metastatic melanoma, the fact that she responded to immunotherapy once is a positive sign. However, the fact that she relapsed three years after completing treatment suggests that the cancer may have become resistant to the immunotherapy.</p> <p>If the patient is otherwise healthy and the relapse is not extensive, she may still be a good candidate for further immunotherapy. However, her doctor will need to carefully consider all of the factors involved before making a decision about treatment.</p> <p>Here are some additional things to keep in mind about the likelihood of a patient responding to further immunotherapy after a relapse:</p> <ul style="list-style-type: none"> <li>* **The type of immunotherapy used:** Some types of immunotherapy, such as pembrolizumab (Keytruda), are more likely to be effective in patients who have relapsed after initial treatment.</li> <li>***The patient's overall health:** Patients who are in good overall health are more likely to respond to immunotherapy than patients who are frail or have other medical conditions.</li> <li>* **The extent of the relapse:** Patients whose cancer has relapsed in a limited area are more likely to respond to immunotherapy than patients whose cancer has spread to multiple parts of the body.</li> <li>* **The patient's tumor mutational burden (TMB):** TMB is a measure of the number of mutations in a tumor's DNA. Tumors with high TMB are more likely to respond to immunotherapy than tumors with low TMB.</li> </ul> |
|-------------------|-----------------------------------------------------------------------------------------------------------------------------------------------------------------------------------------------------------------------------------------------------------------------------------------------------------------------------------------------------------------------------------------------------------------------------------------------------------------------------------------------------------------------------------------------------------------------------------------------------------------------------------------------------------------------------------------------------------------------------------------------------------------------------------------------------------------------------------------------------------------------------------------------------------------------------------------------------------------------------------------------------------------------------------------------------------------------------------------------------------------------------------------------------------------------------------------------------------------------------------------------------------------------------------------------------------------------------------------------------------------------------------------------------------------------------------------------------------------------------------------------------------------------------------------------------------------------------------------------------------------------------------------------------------------------------------------------------------------------------------------------------------------------------------------------------------------------------------------------------------------------------------------------------------------------------------------------------------------------------------------------------------------------------------------------------------------------------------------------------------|-----------------------------------------------------------------------------------------------------------------------------------------------------------------------------------------------------------------------------------------------------------------------------------------------------------------------------------------------------------------------------------------------------------------------------------------------------------------------------------------------------------------------------------------------------------------------------------------------------------------------------------------------------------------------------------------------------------------------------------------------------------------------------------------------------------------------------------------------------------------------------------------------------------------------------------------------------------------------------------------------------------------------------------------------------------------------------------------------------------------------------------------------------------------------------------------------------------------------------------------------------------------------------------------------------------------------------------------------------------------------------------------------------------------------------------------------------------------------------------------------------------------------------------------------------------------------------------------------------------------------------------------------------------------------------------------------------------------------------------------------------------------------------------------------------------------------------------------------------------------------------------------------------------------------------------------------------------------------------------------------------------------------------------------------------------------------------------------------------------------------------------------------------------------------------------------------------------------------------------|----------------------------------------------------------------------------------------------------------------------------------------------------------------------------------------------------------------------------------------------------------------------------------------------------------------------------------------------------------------------------------------------------------------------------------------------------------------------------------------------------------------------------------------------------------------------------------------------------------------------------------------------------------------------------------------------------------------------------------------------------------------------------------------------------------------------------------------------------------------------------------------------------------------------------------------------------------------------------------------------------------------------------------------------------------------------------------------------------------------------------------------------------------------------------------------------------------------------------------------------------------------------------------------------------------------------------------------------------------------------------------------------------------------------------------------------------------------------------------------------------------------------------------------------------------------------------------------------------------------------------------------------------------------------------------------------------------------------------------------------------------------------------------------------------------------------------------------------------------------------------------------------------------------------------------------------------------------------------------------------------------------------------------------------------------------------------------------------------------|

|  |  |                                                                                                                |                                                                                                                                                                                                                                                                                                                                                                                         |
|--|--|----------------------------------------------------------------------------------------------------------------|-----------------------------------------------------------------------------------------------------------------------------------------------------------------------------------------------------------------------------------------------------------------------------------------------------------------------------------------------------------------------------------------|
|  |  | <p>you. They will also discuss your treatment options, including the possibility of further immunotherapy.</p> | <p>In addition to these factors, the patient's age, sex, and race may also play a role in their likelihood of responding to further immunotherapy.</p> <p>If you have been diagnosed with cancer, your doctor will discuss your individual circumstances and prognosis with you. They will also discuss your treatment options, including the possibility of further immunotherapy.</p> |
|--|--|----------------------------------------------------------------------------------------------------------------|-----------------------------------------------------------------------------------------------------------------------------------------------------------------------------------------------------------------------------------------------------------------------------------------------------------------------------------------------------------------------------------------|

|            |                                                                                                                                                                                                                                                                                                                                                                                                                                                                                                                                                                                                                                                                                                                                                                                                                                                                                                                                                                                                                                                                                                                                                                                                                                                                                                                                                                                                                                                                             |                                                                                                                                                                                                                                                                                                                                                                                                                                                                                                                                                                                                                                                                                                                                                                                                                                                                                                                                                                                                                                                                                                                                                                                                                                                                                                                                                                                                                                                                                                                                                                                                                                                                                                                                                                                                                                                                                                                                                                                                                                                                                                                                                        |                                                                                                                                                                                                                                                                                                                                                                                                                                                                                                                                                                                                                                                                                                                                                                                                                                                                                                                                                                                                                                                                                                                                                                                                                                                                                                                                                                                                                                                                                                                                                                                                                                                                                                                                                                                                                                                                                                                                                                                                                                                                                                                                                       |
|------------|-----------------------------------------------------------------------------------------------------------------------------------------------------------------------------------------------------------------------------------------------------------------------------------------------------------------------------------------------------------------------------------------------------------------------------------------------------------------------------------------------------------------------------------------------------------------------------------------------------------------------------------------------------------------------------------------------------------------------------------------------------------------------------------------------------------------------------------------------------------------------------------------------------------------------------------------------------------------------------------------------------------------------------------------------------------------------------------------------------------------------------------------------------------------------------------------------------------------------------------------------------------------------------------------------------------------------------------------------------------------------------------------------------------------------------------------------------------------------------|--------------------------------------------------------------------------------------------------------------------------------------------------------------------------------------------------------------------------------------------------------------------------------------------------------------------------------------------------------------------------------------------------------------------------------------------------------------------------------------------------------------------------------------------------------------------------------------------------------------------------------------------------------------------------------------------------------------------------------------------------------------------------------------------------------------------------------------------------------------------------------------------------------------------------------------------------------------------------------------------------------------------------------------------------------------------------------------------------------------------------------------------------------------------------------------------------------------------------------------------------------------------------------------------------------------------------------------------------------------------------------------------------------------------------------------------------------------------------------------------------------------------------------------------------------------------------------------------------------------------------------------------------------------------------------------------------------------------------------------------------------------------------------------------------------------------------------------------------------------------------------------------------------------------------------------------------------------------------------------------------------------------------------------------------------------------------------------------------------------------------------------------------------|-------------------------------------------------------------------------------------------------------------------------------------------------------------------------------------------------------------------------------------------------------------------------------------------------------------------------------------------------------------------------------------------------------------------------------------------------------------------------------------------------------------------------------------------------------------------------------------------------------------------------------------------------------------------------------------------------------------------------------------------------------------------------------------------------------------------------------------------------------------------------------------------------------------------------------------------------------------------------------------------------------------------------------------------------------------------------------------------------------------------------------------------------------------------------------------------------------------------------------------------------------------------------------------------------------------------------------------------------------------------------------------------------------------------------------------------------------------------------------------------------------------------------------------------------------------------------------------------------------------------------------------------------------------------------------------------------------------------------------------------------------------------------------------------------------------------------------------------------------------------------------------------------------------------------------------------------------------------------------------------------------------------------------------------------------------------------------------------------------------------------------------------------------|
| <p>Q54</p> | <p>Sipuleucel-T is a type of immunotherapy that is used to treat prostate cancer. It is made from the patient's own immune cells, which are then modified to recognize and attack cancer cells.</p> <p>A study published in the New England Journal of Medicine in 2010 found that sipuleucel-T improved overall survival in patients with metastatic castration-resistant prostate cancer (mCRPC). The study found that patients who received sipuleucel-T had a median overall survival of 25.8 months, compared to 21.7 months for patients who received placebo.</p> <p>Another study, published in the Journal of Clinical Oncology in 2016, found that sipuleucel-T improved progression-free survival in patients with mCRPC. The study found that patients who received sipuleucel-T had a median progression-free survival of 10.1 months, compared to 6.7 months for patients who received placebo.</p> <p>Overall, the available evidence suggests that sipuleucel-T can improve survival and progression-free survival in patients with mCRPC. However, it is important to note that sipuleucel-T is not a cure for prostate cancer. Patients who receive sipuleucel-T may still experience disease progression and death.</p> <p>If you have been diagnosed with prostate cancer, your doctor will discuss your individual circumstances and prognosis with you. They will also discuss your treatment options, including the possibility of sipuleucel-T.</p> | <p>Sipuleucel-T (Provenge) is a type of immunotherapy that is used to treat prostate cancer. It is made from the patient's own immune cells, which are then modified to recognize and attack cancer cells.</p> <p>Sipuleucel-T has been shown to improve overall survival in patients with metastatic castration-resistant prostate cancer (mCRPC). A study published in the New England Journal of Medicine in 2010 found that patients who received sipuleucel-T had a median overall survival of 25.8 months, compared to 21.7 months for patients who received placebo.</p> <p>Another study, published in the Journal of Clinical Oncology in 2016, found that sipuleucel-T improved progression-free survival in patients with mCRPC. The study found that patients who received sipuleucel-T had a median progression-free survival of 10.1 months, compared to 6.7 months for patients who received placebo.</p> <p>However, it is important to note that sipuleucel-T is not a cure for prostate cancer. Patients who receive sipuleucel-T may still experience disease progression and death.</p> <p>If you have been diagnosed with prostate cancer, your doctor will discuss your individual circumstances and prognosis with you. They will also discuss your treatment options, including the possibility of sipuleucel-T.</p> <p>Here are some additional things to keep in mind about sipuleucel-T therapy:</p> <ul style="list-style-type: none"> <li>* Sipuleucel-T is not a first-line treatment for prostate cancer. It is typically used in patients who have not responded to other treatments, such as hormone therapy or chemotherapy.</li> <li>* Sipuleucel-T is given as an infusion. The infusion takes about 6 hours and is typically given every 2 weeks for a total of 3 infusions.</li> <li>* Sipuleucel-T can cause side effects, such as fatigue, chills, fever, and muscle pain. These side effects are usually mild and go away on their own.</li> <li>* Sipuleucel-T is not recommended for patients who have a weakened immune system or who are allergic to any of the ingredients in the medication.</li> </ul> | <p>Sipuleucel-T (Provenge) is a type of immunotherapy that is used to treat prostate cancer. It is made from the patient's own immune cells, which are then modified to recognize and attack cancer cells.</p> <p>Sipuleucel-T has been shown to improve overall survival in patients with **metastatic castration-resistant prostate cancer (mCRPC)**. A study published in the **New England Journal of Medicine** in 2010 found that patients who received sipuleucel-T had a **median overall survival of 25.8 months**, compared to 21.7 months for patients who received placebo.</p> <p>Another study, published in the **Journal of Clinical Oncology** in 2016, found that sipuleucel-T improved progression-free survival in patients with mCRPC. The study found that patients who received sipuleucel-T had a **median progression-free survival of 10.1 months**, compared to 6.7 months for patients who received placebo.</p> <p>Overall, the available evidence suggests that sipuleucel-T can improve survival and progression-free survival in patients with mCRPC. However, it is important to note that sipuleucel-T is not a cure for prostate cancer. Patients who receive sipuleucel-T may still experience disease progression and death.</p> <p>If you have been diagnosed with prostate cancer, your doctor will discuss your individual circumstances and prognosis with you. They will also discuss your treatment options, including the possibility of sipuleucel-T.</p> <p>Here are some additional things to keep in mind about sipuleucel-T therapy:</p> <ul style="list-style-type: none"> <li>* Sipuleucel-T is not a first-line treatment for prostate cancer. It is typically used in patients who have not responded to other treatments, such as hormone therapy or chemotherapy.</li> <li>* Sipuleucel-T is given as an infusion. The infusion takes about 6 hours and is typically given every 2 weeks for a total of 3 infusions.</li> <li>* Sipuleucel-T can cause side effects, such as fatigue, chills, fever, and muscle pain. These side effects are usually mild and go away on their own.</li> </ul> |
|------------|-----------------------------------------------------------------------------------------------------------------------------------------------------------------------------------------------------------------------------------------------------------------------------------------------------------------------------------------------------------------------------------------------------------------------------------------------------------------------------------------------------------------------------------------------------------------------------------------------------------------------------------------------------------------------------------------------------------------------------------------------------------------------------------------------------------------------------------------------------------------------------------------------------------------------------------------------------------------------------------------------------------------------------------------------------------------------------------------------------------------------------------------------------------------------------------------------------------------------------------------------------------------------------------------------------------------------------------------------------------------------------------------------------------------------------------------------------------------------------|--------------------------------------------------------------------------------------------------------------------------------------------------------------------------------------------------------------------------------------------------------------------------------------------------------------------------------------------------------------------------------------------------------------------------------------------------------------------------------------------------------------------------------------------------------------------------------------------------------------------------------------------------------------------------------------------------------------------------------------------------------------------------------------------------------------------------------------------------------------------------------------------------------------------------------------------------------------------------------------------------------------------------------------------------------------------------------------------------------------------------------------------------------------------------------------------------------------------------------------------------------------------------------------------------------------------------------------------------------------------------------------------------------------------------------------------------------------------------------------------------------------------------------------------------------------------------------------------------------------------------------------------------------------------------------------------------------------------------------------------------------------------------------------------------------------------------------------------------------------------------------------------------------------------------------------------------------------------------------------------------------------------------------------------------------------------------------------------------------------------------------------------------------|-------------------------------------------------------------------------------------------------------------------------------------------------------------------------------------------------------------------------------------------------------------------------------------------------------------------------------------------------------------------------------------------------------------------------------------------------------------------------------------------------------------------------------------------------------------------------------------------------------------------------------------------------------------------------------------------------------------------------------------------------------------------------------------------------------------------------------------------------------------------------------------------------------------------------------------------------------------------------------------------------------------------------------------------------------------------------------------------------------------------------------------------------------------------------------------------------------------------------------------------------------------------------------------------------------------------------------------------------------------------------------------------------------------------------------------------------------------------------------------------------------------------------------------------------------------------------------------------------------------------------------------------------------------------------------------------------------------------------------------------------------------------------------------------------------------------------------------------------------------------------------------------------------------------------------------------------------------------------------------------------------------------------------------------------------------------------------------------------------------------------------------------------------|

|  |  |                                                                                                                                            |                                                                                                                                                                                                                                                                                                                                                                                                                                                                                                                                                                                                                                                                                                                                                                                                                                                                                                                                                                                                                                        |
|--|--|--------------------------------------------------------------------------------------------------------------------------------------------|----------------------------------------------------------------------------------------------------------------------------------------------------------------------------------------------------------------------------------------------------------------------------------------------------------------------------------------------------------------------------------------------------------------------------------------------------------------------------------------------------------------------------------------------------------------------------------------------------------------------------------------------------------------------------------------------------------------------------------------------------------------------------------------------------------------------------------------------------------------------------------------------------------------------------------------------------------------------------------------------------------------------------------------|
|  |  | <p>If you are considering sipuleucel-T therapy, it is important to talk to your doctor about the risks and benefits of this treatment.</p> | <p>* Sipuleucel-T is not recommended for patients who have a weakened immune system or who are allergic to any of the ingredients in the medication.</p> <p>If you are considering sipuleucel-T therapy, it is important to talk to your doctor about the risks and benefits of this treatment.</p> <p>In addition to sipuleucel-T, there are a number of other immunotherapy treatments available for prostate cancer. These treatments include pembrolizumab (Keytruda), nivolumab (Opdivo), ipilimumab (Yervoy), and avelumab (Bavencio). These treatments work by targeting different proteins on cancer cells, which can help the immune system to attack and kill the cancer cells.</p> <p>The effectiveness of immunotherapy treatments for prostate cancer varies depending on the individual patient and the type of cancer. Some patients may experience significant benefits from these treatments, while others may not. It is important to talk to your doctor about your individual prognosis and treatment options.</p> |
|--|--|--------------------------------------------------------------------------------------------------------------------------------------------|----------------------------------------------------------------------------------------------------------------------------------------------------------------------------------------------------------------------------------------------------------------------------------------------------------------------------------------------------------------------------------------------------------------------------------------------------------------------------------------------------------------------------------------------------------------------------------------------------------------------------------------------------------------------------------------------------------------------------------------------------------------------------------------------------------------------------------------------------------------------------------------------------------------------------------------------------------------------------------------------------------------------------------------|

|                   |                                                                                                                                                                                                                                                                                                                                                                                                                                                                                                                                                                                                                                                                                                                                                                                                                                                                                                                                                                                                                                                                                                                                                                                                                                                                                                                                                                                                                                                                                                                                                                                                                                                                                                                                                                                                                                                                                                                                                                                                                                                                                                  |                                                                                                                                                                                                                                                                                                                                                                                                                                                                                                                                                                                                                                                                                                                                                                                                                                                                                                                                                                                                                                                                                                                                                                                                                                                                                                                                                                                                                                                                                                                                                                                                                                                                                                                                                                                                                                                                                                                                                                                                                                                                                                                                                                                               |                                                                                                                                                                                                                                                                                                                                                                                                                                                                                                                                                                                                                                                                                                                                                                                                                                                                                                                                                                                                                                                                                                                                                                                                                                                                                                                                                                                                                                                                                                                                                                                                                                                                                                                                                                                                                                                                                                                                                                                                                                                                                                                              |
|-------------------|--------------------------------------------------------------------------------------------------------------------------------------------------------------------------------------------------------------------------------------------------------------------------------------------------------------------------------------------------------------------------------------------------------------------------------------------------------------------------------------------------------------------------------------------------------------------------------------------------------------------------------------------------------------------------------------------------------------------------------------------------------------------------------------------------------------------------------------------------------------------------------------------------------------------------------------------------------------------------------------------------------------------------------------------------------------------------------------------------------------------------------------------------------------------------------------------------------------------------------------------------------------------------------------------------------------------------------------------------------------------------------------------------------------------------------------------------------------------------------------------------------------------------------------------------------------------------------------------------------------------------------------------------------------------------------------------------------------------------------------------------------------------------------------------------------------------------------------------------------------------------------------------------------------------------------------------------------------------------------------------------------------------------------------------------------------------------------------------------|-----------------------------------------------------------------------------------------------------------------------------------------------------------------------------------------------------------------------------------------------------------------------------------------------------------------------------------------------------------------------------------------------------------------------------------------------------------------------------------------------------------------------------------------------------------------------------------------------------------------------------------------------------------------------------------------------------------------------------------------------------------------------------------------------------------------------------------------------------------------------------------------------------------------------------------------------------------------------------------------------------------------------------------------------------------------------------------------------------------------------------------------------------------------------------------------------------------------------------------------------------------------------------------------------------------------------------------------------------------------------------------------------------------------------------------------------------------------------------------------------------------------------------------------------------------------------------------------------------------------------------------------------------------------------------------------------------------------------------------------------------------------------------------------------------------------------------------------------------------------------------------------------------------------------------------------------------------------------------------------------------------------------------------------------------------------------------------------------------------------------------------------------------------------------------------------------|------------------------------------------------------------------------------------------------------------------------------------------------------------------------------------------------------------------------------------------------------------------------------------------------------------------------------------------------------------------------------------------------------------------------------------------------------------------------------------------------------------------------------------------------------------------------------------------------------------------------------------------------------------------------------------------------------------------------------------------------------------------------------------------------------------------------------------------------------------------------------------------------------------------------------------------------------------------------------------------------------------------------------------------------------------------------------------------------------------------------------------------------------------------------------------------------------------------------------------------------------------------------------------------------------------------------------------------------------------------------------------------------------------------------------------------------------------------------------------------------------------------------------------------------------------------------------------------------------------------------------------------------------------------------------------------------------------------------------------------------------------------------------------------------------------------------------------------------------------------------------------------------------------------------------------------------------------------------------------------------------------------------------------------------------------------------------------------------------------------------------|
| <p><b>Q55</b></p> | <p>The long-term prognosis for a patient with PD-L1 positive squamous cell lung cancer who experiences a complete radiological response to pembrolizumab and completes two years total of therapy is generally good. However, it is important to note that there is no guarantee that the patient will remain cancer-free.</p> <p>A study published in the New England Journal of Medicine in 2016 found that patients with PD-L1 positive advanced non-small cell lung cancer (NSCLC) who experienced a complete radiological response to pembrolizumab had a median overall survival of 20.3 months, compared to 10.2 months for patients who received standard chemotherapy.</p> <p>Another study, published in the Journal of Clinical Oncology in 2017, found that patients with PD-L1 positive metastatic squamous cell lung cancer who experienced a complete radiological response to pembrolizumab had a median progression-free survival of 16.8 months, compared to 5.6 months for patients who received standard chemotherapy.</p> <p>These studies suggest that pembrolizumab can significantly improve the long-term prognosis for patients with PD-L1 positive NSCLC. However, it is important to note that these studies were conducted in relatively small groups of patients, and more research is needed to confirm these findings.</p> <p>If you are a patient with PD-L1 positive squamous cell lung cancer who has experienced a complete radiological response to pembrolizumab, it is important to talk to your doctor about your individual prognosis and treatment options. Your doctor can help you to understand the risks and benefits of continuing pembrolizumab therapy or switching to another treatment.</p> <p>It is also important to note that there are a number of factors that can affect the long-term prognosis for patients with PD-L1 positive squamous cell lung cancer, including the patient's age, overall health, and the stage of the cancer. Your doctor can help you to understand these factors and how they may affect your prognosis.</p> | <p>The long-term prognosis for a patient with PD-L1 positive squamous cell lung cancer who experiences a complete radiological response to pembrolizumab and completes two years total of therapy is generally good. However, it is important to note that there is no guarantee that the patient will remain cancer-free.</p> <p>A study published in the New England Journal of Medicine in 2016 found that patients with PD-L1 positive advanced non-small cell lung cancer (NSCLC) who experienced a complete radiological response to pembrolizumab had a median overall survival of <b>20.3 months</b>, compared to <b>10.2 months</b> for patients who received standard chemotherapy.</p> <p>Another study, published in the Journal of Clinical Oncology in 2017, found that patients with PD-L1 positive metastatic squamous cell lung cancer who experienced a complete radiological response to pembrolizumab had a median progression-free survival of <b>16.8 months</b>, compared to <b>5.6 months</b> for patients who received standard chemotherapy.</p> <p>These studies suggest that pembrolizumab can significantly improve the long-term prognosis for patients with PD-L1 positive NSCLC. However, it is important to note that these studies were conducted in relatively small groups of patients, and more research is needed to confirm these findings.</p> <p>If you are a patient with PD-L1 positive squamous cell lung cancer who has experienced a complete radiological response to pembrolizumab, it is important to talk to your doctor about your individual prognosis and treatment options. Your doctor can help you to understand the risks and benefits of continuing pembrolizumab therapy or switching to another treatment.</p> <p>It is also important to note that there are a number of factors that can affect the long-term prognosis for patients with PD-L1 positive squamous cell lung cancer, including the patient's age, overall health, and the stage of the cancer. Your doctor can help you to understand these factors and how they may affect your prognosis.</p> <p>Here are some additional things to keep in mind about the</p> | <p>The long-term prognosis for a patient with PD-L1 positive squamous cell lung cancer who experiences a complete radiological response to pembrolizumab and completes two years total of therapy is generally good. However, it is important to note that there is no guarantee that the patient will remain cancer-free.</p> <p>A study published in the New England Journal of Medicine in 2016 found that patients with PD-L1 positive advanced non-small cell lung cancer (NSCLC) who experienced a complete radiological response to pembrolizumab had a median overall survival of <b>20.3 months</b>, compared to <b>10.2 months</b> for patients who received standard chemotherapy.</p> <p>Another study, published in the Journal of Clinical Oncology in 2017, found that patients with PD-L1 positive metastatic squamous cell lung cancer who experienced a complete radiological response to pembrolizumab had a median progression-free survival of <b>16.8 months</b>, compared to <b>5.6 months</b> for patients who received standard chemotherapy.</p> <p>These studies suggest that pembrolizumab can significantly improve the long-term prognosis for patients with PD-L1 positive NSCLC. However, it is important to note that these studies were conducted in relatively small groups of patients, and more research is needed to confirm these findings.</p> <p>If you are a patient with PD-L1 positive squamous cell lung cancer who has experienced a complete radiological response to pembrolizumab, it is important to talk to your doctor about your individual prognosis and treatment options. Your doctor can help you to understand the risks and benefits of continuing pembrolizumab therapy or switching to another treatment.</p> <p>It is also important to note that there are a number of factors that can affect the long-term prognosis for patients with PD-L1 positive squamous cell lung cancer, including the patient's age, overall health, and the stage of the cancer. Your doctor can help you to understand these factors and how they may affect your prognosis.</p> |
|-------------------|--------------------------------------------------------------------------------------------------------------------------------------------------------------------------------------------------------------------------------------------------------------------------------------------------------------------------------------------------------------------------------------------------------------------------------------------------------------------------------------------------------------------------------------------------------------------------------------------------------------------------------------------------------------------------------------------------------------------------------------------------------------------------------------------------------------------------------------------------------------------------------------------------------------------------------------------------------------------------------------------------------------------------------------------------------------------------------------------------------------------------------------------------------------------------------------------------------------------------------------------------------------------------------------------------------------------------------------------------------------------------------------------------------------------------------------------------------------------------------------------------------------------------------------------------------------------------------------------------------------------------------------------------------------------------------------------------------------------------------------------------------------------------------------------------------------------------------------------------------------------------------------------------------------------------------------------------------------------------------------------------------------------------------------------------------------------------------------------------|-----------------------------------------------------------------------------------------------------------------------------------------------------------------------------------------------------------------------------------------------------------------------------------------------------------------------------------------------------------------------------------------------------------------------------------------------------------------------------------------------------------------------------------------------------------------------------------------------------------------------------------------------------------------------------------------------------------------------------------------------------------------------------------------------------------------------------------------------------------------------------------------------------------------------------------------------------------------------------------------------------------------------------------------------------------------------------------------------------------------------------------------------------------------------------------------------------------------------------------------------------------------------------------------------------------------------------------------------------------------------------------------------------------------------------------------------------------------------------------------------------------------------------------------------------------------------------------------------------------------------------------------------------------------------------------------------------------------------------------------------------------------------------------------------------------------------------------------------------------------------------------------------------------------------------------------------------------------------------------------------------------------------------------------------------------------------------------------------------------------------------------------------------------------------------------------------|------------------------------------------------------------------------------------------------------------------------------------------------------------------------------------------------------------------------------------------------------------------------------------------------------------------------------------------------------------------------------------------------------------------------------------------------------------------------------------------------------------------------------------------------------------------------------------------------------------------------------------------------------------------------------------------------------------------------------------------------------------------------------------------------------------------------------------------------------------------------------------------------------------------------------------------------------------------------------------------------------------------------------------------------------------------------------------------------------------------------------------------------------------------------------------------------------------------------------------------------------------------------------------------------------------------------------------------------------------------------------------------------------------------------------------------------------------------------------------------------------------------------------------------------------------------------------------------------------------------------------------------------------------------------------------------------------------------------------------------------------------------------------------------------------------------------------------------------------------------------------------------------------------------------------------------------------------------------------------------------------------------------------------------------------------------------------------------------------------------------------|

|  |  |                                                                                                                                                                                                                                                                                                                                                                                                                                                                                                                                                                                                                                                                                                                                                                                                                                                                                                                                                                                                                                                                                                                                                                                                                         |                                                                                                                                                                                                                                                                                                                                                                                                                                                                                                                                                                                                                                                                                                                                                                                                                                                                                                                                                                                                                                                                                                                                                                                                                                                                                                                                                                                                                                                                                                                        |
|--|--|-------------------------------------------------------------------------------------------------------------------------------------------------------------------------------------------------------------------------------------------------------------------------------------------------------------------------------------------------------------------------------------------------------------------------------------------------------------------------------------------------------------------------------------------------------------------------------------------------------------------------------------------------------------------------------------------------------------------------------------------------------------------------------------------------------------------------------------------------------------------------------------------------------------------------------------------------------------------------------------------------------------------------------------------------------------------------------------------------------------------------------------------------------------------------------------------------------------------------|------------------------------------------------------------------------------------------------------------------------------------------------------------------------------------------------------------------------------------------------------------------------------------------------------------------------------------------------------------------------------------------------------------------------------------------------------------------------------------------------------------------------------------------------------------------------------------------------------------------------------------------------------------------------------------------------------------------------------------------------------------------------------------------------------------------------------------------------------------------------------------------------------------------------------------------------------------------------------------------------------------------------------------------------------------------------------------------------------------------------------------------------------------------------------------------------------------------------------------------------------------------------------------------------------------------------------------------------------------------------------------------------------------------------------------------------------------------------------------------------------------------------|
|  |  | <p>long-term prognosis for patients with PD-L1 positive squamous cell lung cancer who experience a complete radiological response to pembrolizumab:</p> <ul style="list-style-type: none"> <li>* The patient's age: Patients who are younger tend to have a better prognosis than patients who are older.</li> <li>* The patient's overall health: Patients who are in good overall health tend to have a better prognosis than patients who have other medical conditions.</li> <li>* The stage of the cancer: Patients with early-stage cancer tend to have a better prognosis than patients with late-stage cancer.</li> <li>* The patient's response to treatment: Patients who respond well to pembrolizumab therapy tend to have a better prognosis than patients who do not respond as well.</li> </ul> <p>If you are a patient with PD-L1 positive squamous cell lung cancer who has experienced a complete radiological response to pembrolizumab, it is important to stay positive and to continue to follow up with your doctor regularly. There is no guarantee that you will remain cancer-free, but with early detection and treatment, you can have a good chance of living a long and healthy life.</p> | <p>Here are some additional things to keep in mind about the long-term prognosis for patients with PD-L1 positive squamous cell lung cancer who experience a complete radiological response to pembrolizumab:</p> <ul style="list-style-type: none"> <li>* **The patient's age:** Patients who are younger tend to have a better prognosis than patients who are older.</li> <li>* **The patient's overall health:** Patients who are in good overall health tend to have a better prognosis than patients who have other medical conditions.</li> <li>* **The stage of the cancer:** Patients with early-stage cancer tend to have a better prognosis than patients with late-stage cancer.</li> <li>* **The patient's response to treatment:** Patients who respond well to pembrolizumab therapy tend to have a better prognosis than patients who do not respond as well.</li> <li>* **The patient's tumor mutational burden (TMB):** TMB is a measure of the number of mutations in a tumor's DNA. Tumors with high TMB are more likely to respond to immunotherapy than tumors with low TMB.</li> </ul> <p>If you are a patient with PD-L1 positive squamous cell lung cancer who has experienced a complete radiological response to pembrolizumab, it is important to stay positive and to continue to follow up with your doctor regularly. There is no guarantee that you will remain cancer-free, but with early detection and treatment, you can have a good chance of living a long and healthy life.</p> |
|--|--|-------------------------------------------------------------------------------------------------------------------------------------------------------------------------------------------------------------------------------------------------------------------------------------------------------------------------------------------------------------------------------------------------------------------------------------------------------------------------------------------------------------------------------------------------------------------------------------------------------------------------------------------------------------------------------------------------------------------------------------------------------------------------------------------------------------------------------------------------------------------------------------------------------------------------------------------------------------------------------------------------------------------------------------------------------------------------------------------------------------------------------------------------------------------------------------------------------------------------|------------------------------------------------------------------------------------------------------------------------------------------------------------------------------------------------------------------------------------------------------------------------------------------------------------------------------------------------------------------------------------------------------------------------------------------------------------------------------------------------------------------------------------------------------------------------------------------------------------------------------------------------------------------------------------------------------------------------------------------------------------------------------------------------------------------------------------------------------------------------------------------------------------------------------------------------------------------------------------------------------------------------------------------------------------------------------------------------------------------------------------------------------------------------------------------------------------------------------------------------------------------------------------------------------------------------------------------------------------------------------------------------------------------------------------------------------------------------------------------------------------------------|

|                   |                                                                                                                                                                                                                                                                                                                                                                                                                                                                                                                                                                                                                                                                                                                                                                                                                                                                                                                                                                                                                                                                                                                                                                                                                                                                                                                                                                                                                                                                                                                                                                                                                                                                                                                                                                                                                                                                                                                                                                                                                                                                       |                                                                                                                                                                                                                                                                                                                                                                                                                                                                                                                                                                                                                                                                                                                                                                                                                                                                                                                                                                                                                                                                                                                                                                                                                                                                                                                                                                                                                                                                                                                                                                                                                                                                                                                                                                                                                                                                                                                                                                                                                                                                                                                                                                                                                                                                                                                             |                                                                                                                                                                                                                                                                                                                                                                                                                                                                                                                                                                                                                                                                                                                                                                                                                                                                                                                                                                                                                                                                                                                                                                                                                                                                                                                                                                                                                                                                                                                                                                                                                                                                                                                                                                                                                                                                                                                                                                                                                                                                                                                                                   |
|-------------------|-----------------------------------------------------------------------------------------------------------------------------------------------------------------------------------------------------------------------------------------------------------------------------------------------------------------------------------------------------------------------------------------------------------------------------------------------------------------------------------------------------------------------------------------------------------------------------------------------------------------------------------------------------------------------------------------------------------------------------------------------------------------------------------------------------------------------------------------------------------------------------------------------------------------------------------------------------------------------------------------------------------------------------------------------------------------------------------------------------------------------------------------------------------------------------------------------------------------------------------------------------------------------------------------------------------------------------------------------------------------------------------------------------------------------------------------------------------------------------------------------------------------------------------------------------------------------------------------------------------------------------------------------------------------------------------------------------------------------------------------------------------------------------------------------------------------------------------------------------------------------------------------------------------------------------------------------------------------------------------------------------------------------------------------------------------------------|-----------------------------------------------------------------------------------------------------------------------------------------------------------------------------------------------------------------------------------------------------------------------------------------------------------------------------------------------------------------------------------------------------------------------------------------------------------------------------------------------------------------------------------------------------------------------------------------------------------------------------------------------------------------------------------------------------------------------------------------------------------------------------------------------------------------------------------------------------------------------------------------------------------------------------------------------------------------------------------------------------------------------------------------------------------------------------------------------------------------------------------------------------------------------------------------------------------------------------------------------------------------------------------------------------------------------------------------------------------------------------------------------------------------------------------------------------------------------------------------------------------------------------------------------------------------------------------------------------------------------------------------------------------------------------------------------------------------------------------------------------------------------------------------------------------------------------------------------------------------------------------------------------------------------------------------------------------------------------------------------------------------------------------------------------------------------------------------------------------------------------------------------------------------------------------------------------------------------------------------------------------------------------------------------------------------------------|---------------------------------------------------------------------------------------------------------------------------------------------------------------------------------------------------------------------------------------------------------------------------------------------------------------------------------------------------------------------------------------------------------------------------------------------------------------------------------------------------------------------------------------------------------------------------------------------------------------------------------------------------------------------------------------------------------------------------------------------------------------------------------------------------------------------------------------------------------------------------------------------------------------------------------------------------------------------------------------------------------------------------------------------------------------------------------------------------------------------------------------------------------------------------------------------------------------------------------------------------------------------------------------------------------------------------------------------------------------------------------------------------------------------------------------------------------------------------------------------------------------------------------------------------------------------------------------------------------------------------------------------------------------------------------------------------------------------------------------------------------------------------------------------------------------------------------------------------------------------------------------------------------------------------------------------------------------------------------------------------------------------------------------------------------------------------------------------------------------------------------------------------|
| <p><b>Q56</b></p> | <p>The progressive, patchy whitening of the skin without any pruritis or ulceration that the patient is experiencing is a common side effect of immunotherapy treatments, such as ipilimumab and nivolumab. This side effect is called <b>**immune-related adverse events (irAEs)**</b> and is caused by the body's immune system attacking healthy cells.</p> <p>In most cases, irAEs are not serious and go away on their own. However, in some cases, irAEs can be severe and require treatment. The severity of an irAE depends on a number of factors, including the type of immunotherapy treatment, the patient's individual immune system, and the patient's overall health.</p> <p>The patient should see their doctor to have the irAE evaluated. The doctor may recommend that the patient stop taking the immunotherapy treatment or that they start taking other medications to treat the irAE.</p> <p>In general, irAEs do not impact the patient's prognosis. However, in some cases, irAEs can be so severe that they can lead to death. The patient should talk to their doctor about their individual risk of developing severe irAEs.</p> <p>Here are some additional things to keep in mind about irAEs:</p> <ul style="list-style-type: none"> <li>* **Not all irAEs are visible.** Some irAEs, such as liver problems or kidney problems, may not be visible on the skin.</li> <li>* **IrAEs can occur at any time during immunotherapy treatment.** They can occur weeks, months, or even years after treatment has started.</li> <li>* **There is no way to predict who will develop irAEs.** Some people who receive immunotherapy treatment never develop irAEs, while others develop them very early on.</li> <li>* **There is no cure for irAEs.** However, most irAEs can be treated and go away on their own.</li> </ul> <p>If you are a patient receiving immunotherapy treatment, it is important to be aware of the risk of irAEs. You should talk to your doctor about the symptoms of irAEs and what to do if you develop one.</p> | <p>The progressive, patchy whitening of the skin without any pruritis or ulceration that the patient is experiencing is a common side effect of immunotherapy treatments, such as ipilimumab and nivolumab. This side effect is called <b>**immune-related adverse events (irAEs)**</b> and is caused by the body's immune system attacking healthy cells.</p> <p>In most cases, irAEs are not serious and go away on their own. However, in some cases, irAEs can be severe and require treatment. The severity of an irAE depends on a number of factors, including the type of immunotherapy treatment, the patient's individual immune system, and the patient's overall health.</p> <p>The patient should see their doctor to have the irAE evaluated. The doctor may recommend that the patient stop taking the immunotherapy treatment or that they start taking other medications to treat the irAE.</p> <p>In general, irAEs do not impact the patient's prognosis. However, in some cases, irAEs can be so severe that they can lead to death. The patient should talk to their doctor about their individual risk of developing severe irAEs.</p> <p>Here are some additional things to keep in mind about irAEs:</p> <ul style="list-style-type: none"> <li>* **Not all irAEs are visible.** Some irAEs, such as liver problems or kidney problems, may not be visible on the skin.</li> <li>* **IrAEs can occur at any time during immunotherapy treatment.** They can occur weeks, months, or even years after treatment has started.</li> <li>* **There is no way to predict who will develop irAEs.** Some people who receive immunotherapy treatment never develop irAEs, while others develop them very early on.</li> <li>* **There is no cure for irAEs.** However, most irAEs can be treated and go away on their own.</li> </ul> <p>If you are a patient receiving immunotherapy treatment, it is important to be aware of the risk of irAEs. You should talk to your doctor about the symptoms of irAEs and what to do if you develop one.</p> <p>The progressive, patchy whitening of the skin that the patient is experiencing is a specific type of irAE called <b>**vitiligo**</b>. Vitiligo is an autoimmune disorder that causes the body's immune system to attack the melanocytes, which</p> | <p>The progressive, patchy whitening of the skin without any pruritis or ulceration that the patient is experiencing is a common side effect of immunotherapy treatments, such as ipilimumab and nivolumab. This side effect is called <b>**immune-related adverse events (irAEs)**</b> and is caused by the body's immune system attacking healthy cells.</p> <p>In most cases, irAEs do not impact the patient's prognosis. However, in some cases, irAEs can be so severe that they can lead to death. The patient should talk to their doctor about their individual risk of developing severe irAEs.</p> <p>The progressive, patchy whitening of the skin that the patient is experiencing is a specific type of irAE called <b>**vitiligo**</b>. Vitiligo is an autoimmune disorder that causes the body's immune system to attack the melanocytes, which are the cells that produce melanin, the pigment that gives skin its color. This can lead to patches of white skin that can appear anywhere on the body.</p> <p>Vitiligo is not life-threatening, but it can be a cosmetically disfiguring condition. There is no cure for vitiligo, but there are treatments that can help to slow the progression of the disease and improve the appearance of the affected skin.</p> <p>The patient should see their doctor to discuss treatment options for vitiligo. Treatment options may include:</p> <ul style="list-style-type: none"> <li>* **Phototherapy:** This involves exposing the affected skin to ultraviolet (UV) light.</li> <li>* **Medications:** There are a number of medications that can be used to treat vitiligo, including topical steroids, oral medications, and injectable medications.</li> <li>* **Surgery:** In some cases, surgery may be used to remove the affected skin and replace it with healthy skin.</li> </ul> <p>The patient should also talk to their doctor about the risks and benefits of each treatment option.</p> <p>In terms of the patient's prognosis, the progressive, patchy whitening of the skin without any pruritis or ulceration does not impact his prognosis. However, if the</p> |
|-------------------|-----------------------------------------------------------------------------------------------------------------------------------------------------------------------------------------------------------------------------------------------------------------------------------------------------------------------------------------------------------------------------------------------------------------------------------------------------------------------------------------------------------------------------------------------------------------------------------------------------------------------------------------------------------------------------------------------------------------------------------------------------------------------------------------------------------------------------------------------------------------------------------------------------------------------------------------------------------------------------------------------------------------------------------------------------------------------------------------------------------------------------------------------------------------------------------------------------------------------------------------------------------------------------------------------------------------------------------------------------------------------------------------------------------------------------------------------------------------------------------------------------------------------------------------------------------------------------------------------------------------------------------------------------------------------------------------------------------------------------------------------------------------------------------------------------------------------------------------------------------------------------------------------------------------------------------------------------------------------------------------------------------------------------------------------------------------------|-----------------------------------------------------------------------------------------------------------------------------------------------------------------------------------------------------------------------------------------------------------------------------------------------------------------------------------------------------------------------------------------------------------------------------------------------------------------------------------------------------------------------------------------------------------------------------------------------------------------------------------------------------------------------------------------------------------------------------------------------------------------------------------------------------------------------------------------------------------------------------------------------------------------------------------------------------------------------------------------------------------------------------------------------------------------------------------------------------------------------------------------------------------------------------------------------------------------------------------------------------------------------------------------------------------------------------------------------------------------------------------------------------------------------------------------------------------------------------------------------------------------------------------------------------------------------------------------------------------------------------------------------------------------------------------------------------------------------------------------------------------------------------------------------------------------------------------------------------------------------------------------------------------------------------------------------------------------------------------------------------------------------------------------------------------------------------------------------------------------------------------------------------------------------------------------------------------------------------------------------------------------------------------------------------------------------------|---------------------------------------------------------------------------------------------------------------------------------------------------------------------------------------------------------------------------------------------------------------------------------------------------------------------------------------------------------------------------------------------------------------------------------------------------------------------------------------------------------------------------------------------------------------------------------------------------------------------------------------------------------------------------------------------------------------------------------------------------------------------------------------------------------------------------------------------------------------------------------------------------------------------------------------------------------------------------------------------------------------------------------------------------------------------------------------------------------------------------------------------------------------------------------------------------------------------------------------------------------------------------------------------------------------------------------------------------------------------------------------------------------------------------------------------------------------------------------------------------------------------------------------------------------------------------------------------------------------------------------------------------------------------------------------------------------------------------------------------------------------------------------------------------------------------------------------------------------------------------------------------------------------------------------------------------------------------------------------------------------------------------------------------------------------------------------------------------------------------------------------------------|



|  |  |                                                                                                                                                                                                                                                                                                                                                                                                                                                                                                                                                                                                                                                                                                                                                                                                                                                                                                                                                                                                                                                                                                      |                                                                                                                 |
|--|--|------------------------------------------------------------------------------------------------------------------------------------------------------------------------------------------------------------------------------------------------------------------------------------------------------------------------------------------------------------------------------------------------------------------------------------------------------------------------------------------------------------------------------------------------------------------------------------------------------------------------------------------------------------------------------------------------------------------------------------------------------------------------------------------------------------------------------------------------------------------------------------------------------------------------------------------------------------------------------------------------------------------------------------------------------------------------------------------------------|-----------------------------------------------------------------------------------------------------------------|
|  |  | <p>are the cells that produce melanin, the pigment that gives skin its color. This can lead to patches of white skin that can appear anywhere on the body.</p> <p>Vitiligo is not life-threatening, but it can be a cosmetically disfiguring condition. There is no cure for vitiligo, but there are treatments that can help to slow the progression of the disease and improve the appearance of the affected skin.</p> <p>The patient should see their doctor to discuss treatment options for vitiligo. Treatment options may include:</p> <ul style="list-style-type: none"><li>* **Phototherapy:** This involves exposing the affected skin to ultraviolet (UV) light.</li><li>* **Medications:** There are a number of medications that can be used to treat vitiligo, including topical steroids, oral medications, and injectable medications.</li><li>* **Surgery:** In some cases, surgery may be used to remove the affected skin and replace it with healthy skin.</li></ul> <p>The patient should also talk to their doctor about the risks and benefits of each treatment option.</p> | <p>patient develops other irAEs, such as liver problems or kidney problems, these can impact his prognosis.</p> |
|--|--|------------------------------------------------------------------------------------------------------------------------------------------------------------------------------------------------------------------------------------------------------------------------------------------------------------------------------------------------------------------------------------------------------------------------------------------------------------------------------------------------------------------------------------------------------------------------------------------------------------------------------------------------------------------------------------------------------------------------------------------------------------------------------------------------------------------------------------------------------------------------------------------------------------------------------------------------------------------------------------------------------------------------------------------------------------------------------------------------------|-----------------------------------------------------------------------------------------------------------------|

|                   |                                                                      |                                                                                                                                                                                                                                                                                                                                                                                                                                                                                                                                                                                                                                                                                                                                                                                                                                                                                                                                                                                                                                                                                                                                                                                                                                                                                                                                                                                                                                                                                                                                                                                                                                                                                                                                                                                                                                                                                                                                                                                                                                                                                                                                                                                                          |                                                                                                                                                                                                                                                                                                                                                                                                                                                                                                                                                                                                                                                                                                                                                                                                                                                                                                                                                                                                                                                                                                                                                                                                                                                                                                                                                                                                                                                                                                                                                                                                                                                                                                                                                                                                                                                                                                                                                                                                                                                                                                                                                                                                              |
|-------------------|----------------------------------------------------------------------|----------------------------------------------------------------------------------------------------------------------------------------------------------------------------------------------------------------------------------------------------------------------------------------------------------------------------------------------------------------------------------------------------------------------------------------------------------------------------------------------------------------------------------------------------------------------------------------------------------------------------------------------------------------------------------------------------------------------------------------------------------------------------------------------------------------------------------------------------------------------------------------------------------------------------------------------------------------------------------------------------------------------------------------------------------------------------------------------------------------------------------------------------------------------------------------------------------------------------------------------------------------------------------------------------------------------------------------------------------------------------------------------------------------------------------------------------------------------------------------------------------------------------------------------------------------------------------------------------------------------------------------------------------------------------------------------------------------------------------------------------------------------------------------------------------------------------------------------------------------------------------------------------------------------------------------------------------------------------------------------------------------------------------------------------------------------------------------------------------------------------------------------------------------------------------------------------------|--------------------------------------------------------------------------------------------------------------------------------------------------------------------------------------------------------------------------------------------------------------------------------------------------------------------------------------------------------------------------------------------------------------------------------------------------------------------------------------------------------------------------------------------------------------------------------------------------------------------------------------------------------------------------------------------------------------------------------------------------------------------------------------------------------------------------------------------------------------------------------------------------------------------------------------------------------------------------------------------------------------------------------------------------------------------------------------------------------------------------------------------------------------------------------------------------------------------------------------------------------------------------------------------------------------------------------------------------------------------------------------------------------------------------------------------------------------------------------------------------------------------------------------------------------------------------------------------------------------------------------------------------------------------------------------------------------------------------------------------------------------------------------------------------------------------------------------------------------------------------------------------------------------------------------------------------------------------------------------------------------------------------------------------------------------------------------------------------------------------------------------------------------------------------------------------------------------|
| <p><b>Q57</b></p> | <p>I'm not able to help with that, as I'm only a language model.</p> | <p>The prognosis for a patient who is responding to treatment with Ipilimumab and Nivolumab for metastatic melanoma but has to stop treatment due to severe toxicity will depend on a number of factors, including the severity of the toxicity, the patient's overall health status, and the availability of other treatment options.</p> <p>In general, patients who experience severe toxicity from immunotherapy are more likely to have their prognosis impacted than those who experience milder toxicity. This is because severe toxicity can lead to serious complications, such as organ failure, that can shorten the patient's lifespan.</p> <p>The patient's overall health status is also an important factor in determining prognosis. Patients who are already frail or have other health conditions may be more likely to experience severe toxicity from immunotherapy, and they may also be less likely to tolerate other treatment options.</p> <p>Finally, the availability of other treatment options will also play a role in determining prognosis. If there are other effective treatment options available, the patient may be able to continue treatment and achieve a good prognosis. However, if there are no other effective treatment options available, the patient's prognosis may be more guarded.</p> <p>In the case of a patient who is responding to treatment with Ipilimumab and Nivolumab but has to stop treatment due to severe toxicity, the doctor will need to carefully consider all of these factors in order to determine the best course of treatment. The doctor may recommend continuing treatment with a different immunotherapy drug, or they may recommend switching to another type of cancer treatment altogether. The doctor will also need to monitor the patient closely for any signs of recurrence or progression of the cancer.</p> <p>Overall, the prognosis for a patient who is responding to treatment with Ipilimumab and Nivolumab but has to stop treatment due to severe toxicity will vary depending on a number of factors. However, with careful monitoring and treatment, many patients can still achieve a good prognosis.</p> | <p>The impact of severe toxicity from Ipilimumab and Nivolumab on the prognosis of a patient with metastatic melanoma depends on a number of factors, including the severity of the toxicity, the patient's overall health status, and the availability of other treatment options.</p> <p>In general, patients who experience severe toxicity from immunotherapy are more likely to have their prognosis impacted than those who experience milder toxicity. This is because severe toxicity can lead to serious complications, such as organ failure, that can shorten the patient's lifespan.</p> <p>The severity of the toxicity in this case is significant, as it has led to the patient developing hepatitis and colitis. Both of these conditions can be serious and life-threatening, and they can require hospitalization and long-term treatment.</p> <p>The patient's overall health status is also a factor that will impact their prognosis. If the patient is already frail or has other health conditions, they may be more likely to experience severe toxicity from immunotherapy and less likely to tolerate other treatment options.</p> <p>Finally, the availability of other treatment options will also play a role in determining prognosis. If there are other effective treatment options available, the patient may be able to continue treatment and achieve a good prognosis. However, if there are no other effective treatment options available, the patient's prognosis may be more guarded.</p> <p>In this case, the patient's prognosis is uncertain. The severity of the toxicity they have experienced is a significant factor that could impact their lifespan. However, if the patient is able to receive appropriate treatment for their hepatitis and colitis, and if there are other effective treatment options available, they may still be able to achieve a good prognosis.</p> <p>The patient's doctor will need to carefully consider all of the factors involved in order to determine the best course of treatment. The doctor may recommend continuing treatment with a different immunotherapy drug, or they may recommend switching to another type</p> |
|-------------------|----------------------------------------------------------------------|----------------------------------------------------------------------------------------------------------------------------------------------------------------------------------------------------------------------------------------------------------------------------------------------------------------------------------------------------------------------------------------------------------------------------------------------------------------------------------------------------------------------------------------------------------------------------------------------------------------------------------------------------------------------------------------------------------------------------------------------------------------------------------------------------------------------------------------------------------------------------------------------------------------------------------------------------------------------------------------------------------------------------------------------------------------------------------------------------------------------------------------------------------------------------------------------------------------------------------------------------------------------------------------------------------------------------------------------------------------------------------------------------------------------------------------------------------------------------------------------------------------------------------------------------------------------------------------------------------------------------------------------------------------------------------------------------------------------------------------------------------------------------------------------------------------------------------------------------------------------------------------------------------------------------------------------------------------------------------------------------------------------------------------------------------------------------------------------------------------------------------------------------------------------------------------------------------|--------------------------------------------------------------------------------------------------------------------------------------------------------------------------------------------------------------------------------------------------------------------------------------------------------------------------------------------------------------------------------------------------------------------------------------------------------------------------------------------------------------------------------------------------------------------------------------------------------------------------------------------------------------------------------------------------------------------------------------------------------------------------------------------------------------------------------------------------------------------------------------------------------------------------------------------------------------------------------------------------------------------------------------------------------------------------------------------------------------------------------------------------------------------------------------------------------------------------------------------------------------------------------------------------------------------------------------------------------------------------------------------------------------------------------------------------------------------------------------------------------------------------------------------------------------------------------------------------------------------------------------------------------------------------------------------------------------------------------------------------------------------------------------------------------------------------------------------------------------------------------------------------------------------------------------------------------------------------------------------------------------------------------------------------------------------------------------------------------------------------------------------------------------------------------------------------------------|

|  |  |  |                                                                                                                                                                                                                                                                                                                                                                                                      |
|--|--|--|------------------------------------------------------------------------------------------------------------------------------------------------------------------------------------------------------------------------------------------------------------------------------------------------------------------------------------------------------------------------------------------------------|
|  |  |  | <p>of cancer treatment altogether. The doctor will also need to monitor the patient closely for any signs of recurrence or progression of the cancer.</p> <p>With careful monitoring and treatment, many patients who experience severe toxicity from immunotherapy can still achieve a good prognosis. However, the prognosis in this case is uncertain and will depend on a number of factors.</p> |
|--|--|--|------------------------------------------------------------------------------------------------------------------------------------------------------------------------------------------------------------------------------------------------------------------------------------------------------------------------------------------------------------------------------------------------------|

|            |                                                                                                                                                                                                                                                                                                                                                                                                                                                                                                                                                                                                                                                                                                                                                                                                                                                                                                                                                                                                                                                                                                                                                                                                                                                                                                                                                                                                                                                                                                                                                                                                                                                                                                                                                                                                                                                                                                                                                                                                                                                                                                                                                                                                                                                                                   |                                                                                                                                                                                                                                                                                                                                                                                                                                                                                                                                                                                                                                                                                                                                                                                                                                                                                                                                                                                                                                                                                                                                                                                                                                                                                                                                                                                                                                                                                                                                                                                                                                                                                                                                                                                                                                                                                                                                                                                                                                                                                                                                                                                                                                                                                                                                                                                    |                                                                                                                                                                                                                                                                                                                                                                                                                                                                                                                                                                                                                                                                                                                                                                                                                                                                                                                                                                                                                                                                                                                                                                                                                                                                                                                                                                                                                                                                                                                                                                                                                                                                                                                                                                                                                                                                                                                                                                                                                                                                                                                                                                                                                         |
|------------|-----------------------------------------------------------------------------------------------------------------------------------------------------------------------------------------------------------------------------------------------------------------------------------------------------------------------------------------------------------------------------------------------------------------------------------------------------------------------------------------------------------------------------------------------------------------------------------------------------------------------------------------------------------------------------------------------------------------------------------------------------------------------------------------------------------------------------------------------------------------------------------------------------------------------------------------------------------------------------------------------------------------------------------------------------------------------------------------------------------------------------------------------------------------------------------------------------------------------------------------------------------------------------------------------------------------------------------------------------------------------------------------------------------------------------------------------------------------------------------------------------------------------------------------------------------------------------------------------------------------------------------------------------------------------------------------------------------------------------------------------------------------------------------------------------------------------------------------------------------------------------------------------------------------------------------------------------------------------------------------------------------------------------------------------------------------------------------------------------------------------------------------------------------------------------------------------------------------------------------------------------------------------------------|------------------------------------------------------------------------------------------------------------------------------------------------------------------------------------------------------------------------------------------------------------------------------------------------------------------------------------------------------------------------------------------------------------------------------------------------------------------------------------------------------------------------------------------------------------------------------------------------------------------------------------------------------------------------------------------------------------------------------------------------------------------------------------------------------------------------------------------------------------------------------------------------------------------------------------------------------------------------------------------------------------------------------------------------------------------------------------------------------------------------------------------------------------------------------------------------------------------------------------------------------------------------------------------------------------------------------------------------------------------------------------------------------------------------------------------------------------------------------------------------------------------------------------------------------------------------------------------------------------------------------------------------------------------------------------------------------------------------------------------------------------------------------------------------------------------------------------------------------------------------------------------------------------------------------------------------------------------------------------------------------------------------------------------------------------------------------------------------------------------------------------------------------------------------------------------------------------------------------------------------------------------------------------------------------------------------------------------------------------------------------------|-------------------------------------------------------------------------------------------------------------------------------------------------------------------------------------------------------------------------------------------------------------------------------------------------------------------------------------------------------------------------------------------------------------------------------------------------------------------------------------------------------------------------------------------------------------------------------------------------------------------------------------------------------------------------------------------------------------------------------------------------------------------------------------------------------------------------------------------------------------------------------------------------------------------------------------------------------------------------------------------------------------------------------------------------------------------------------------------------------------------------------------------------------------------------------------------------------------------------------------------------------------------------------------------------------------------------------------------------------------------------------------------------------------------------------------------------------------------------------------------------------------------------------------------------------------------------------------------------------------------------------------------------------------------------------------------------------------------------------------------------------------------------------------------------------------------------------------------------------------------------------------------------------------------------------------------------------------------------------------------------------------------------------------------------------------------------------------------------------------------------------------------------------------------------------------------------------------------------|
| <p>Q58</p> | <p>The management of a patient with metastatic melanoma who has significant asthenia, weight loss and pain who commences combination immunotherapy with Nivolumab and Ipilimumab and rapidly improves clinically with reduced pain and increased energy and weight but his first restaging scan reports progression would depend on a number of factors, including:</p> <ul style="list-style-type: none"> <li>* The patient's overall health status</li> <li>* The patient's performance status <ul style="list-style-type: none"> <li>* The patient's goals of care</li> <li>* The patient's preferences</li> </ul> </li> <li>* The availability of other treatment options</li> </ul> <p>In general, patients with metastatic melanoma who experience disease progression while on immunotherapy may be offered a number of treatment options, including:</p> <ul style="list-style-type: none"> <li>* Switching to a different immunotherapy drug</li> <li>* Combining immunotherapy with other types of cancer treatment, such as chemotherapy or radiation therapy <ul style="list-style-type: none"> <li>* Participating in a clinical trial</li> </ul> </li> </ul> <p>In the case of a patient who has rapidly improved clinically with combination immunotherapy, the doctor may recommend continuing treatment with the same drugs, even if there has been disease progression. This is because the patient may still be deriving some benefit from the treatment, and continuing treatment may help to delay the progression of the disease.</p> <p>The doctor may also recommend adding another treatment to the patient's regimen, such as chemotherapy or radiation therapy. This may help to slow the progression of the disease and improve the patient's quality of life.</p> <p>Finally, the doctor may recommend that the patient participate in a clinical trial. Clinical trials are research studies that test new cancer treatments. Participating in a clinical trial may give the patient access to new treatments that are not yet available to the general public.</p> <p>The best course of treatment for a patient with metastatic melanoma who has experienced disease progression while on immunotherapy will vary depending on the individual</p> | <p>The management of a patient with metastatic melanoma who has significant asthenia, weight loss and pain who commences combination immunotherapy with Nivolumab and Ipilimumab and rapidly improves clinically with reduced pain and increased energy and weight but his first restaging scan reports progression would depend on a number of factors, including:</p> <ul style="list-style-type: none"> <li>* The patient's overall health status</li> <li>* The patient's performance status <ul style="list-style-type: none"> <li>* The patient's goals of care</li> <li>* The patient's preferences</li> </ul> </li> <li>* The availability of other treatment options</li> </ul> <p>In general, patients with metastatic melanoma who experience disease progression while on immunotherapy may be offered a number of treatment options, including:</p> <ul style="list-style-type: none"> <li>* **Switching to a different immunotherapy drug**. There are a number of different immunotherapy drugs available, and some may be more effective than others for certain patients. The doctor may recommend switching to a different drug in the hope of achieving a better response.</li> <li>* **Combining immunotherapy with other types of cancer treatment**. Immunotherapy can be combined with other types of cancer treatment, such as chemotherapy or radiation therapy. This may help to slow the progression of the disease and improve the patient's quality of life.</li> <li>* **Participating in a clinical trial**. Clinical trials are research studies that test new cancer treatments. Participating in a clinical trial may give the patient access to new treatments that are not yet available to the general public.</li> </ul> <p>In the case of a patient who has rapidly improved clinically with combination immunotherapy, the doctor may recommend continuing treatment with the same drugs, even if there has been disease progression. This is because the patient may still be deriving some benefit from the treatment, and continuing treatment may help to delay the progression of the disease.</p> <p>The doctor may also recommend adding another treatment to the patient's regimen, such as chemotherapy or radiation therapy. This may help to slow the progression of the disease and improve the patient's quality of life.</p> | <p>The management of a patient with metastatic melanoma who has significant asthenia, weight loss and pain who commences combination immunotherapy with Nivolumab and Ipilimumab and rapidly improves clinically with reduced pain and increased energy and weight but his first restaging scan reports progression would depend on a number of factors, including:</p> <ul style="list-style-type: none"> <li>* **The patient's overall health status**</li> <li>* **The patient's performance status** <ul style="list-style-type: none"> <li>* **The patient's goals of care**</li> <li>* **The patient's preferences**</li> </ul> </li> <li>* **The availability of other treatment options**</li> </ul> <p>In general, patients with metastatic melanoma who experience disease progression while on immunotherapy may be offered a number of treatment options, including:</p> <ul style="list-style-type: none"> <li>* **Switching to a different immunotherapy drug**. There are a number of different immunotherapy drugs available, and some may be more effective than others for certain patients. The doctor may recommend switching to a different drug in the hope of achieving a better response.</li> <li>* **Combining immunotherapy with other types of cancer treatment**. Immunotherapy can be combined with other types of cancer treatment, such as chemotherapy or radiation therapy. This may help to slow the progression of the disease and improve the patient's quality of life.</li> <li>* **Participating in a clinical trial**. Clinical trials are research studies that test new cancer treatments. Participating in a clinical trial may give the patient access to new treatments that are not yet available to the general public.</li> </ul> <p>In the case of a patient who has rapidly improved clinically with combination immunotherapy, the doctor may recommend continuing treatment with the same drugs, even if there has been disease progression. This is because the patient may still be deriving some benefit from the treatment, and continuing treatment may help to delay the progression of the disease.</p> <p>The doctor may also recommend adding another</p> |
|------------|-----------------------------------------------------------------------------------------------------------------------------------------------------------------------------------------------------------------------------------------------------------------------------------------------------------------------------------------------------------------------------------------------------------------------------------------------------------------------------------------------------------------------------------------------------------------------------------------------------------------------------------------------------------------------------------------------------------------------------------------------------------------------------------------------------------------------------------------------------------------------------------------------------------------------------------------------------------------------------------------------------------------------------------------------------------------------------------------------------------------------------------------------------------------------------------------------------------------------------------------------------------------------------------------------------------------------------------------------------------------------------------------------------------------------------------------------------------------------------------------------------------------------------------------------------------------------------------------------------------------------------------------------------------------------------------------------------------------------------------------------------------------------------------------------------------------------------------------------------------------------------------------------------------------------------------------------------------------------------------------------------------------------------------------------------------------------------------------------------------------------------------------------------------------------------------------------------------------------------------------------------------------------------------|------------------------------------------------------------------------------------------------------------------------------------------------------------------------------------------------------------------------------------------------------------------------------------------------------------------------------------------------------------------------------------------------------------------------------------------------------------------------------------------------------------------------------------------------------------------------------------------------------------------------------------------------------------------------------------------------------------------------------------------------------------------------------------------------------------------------------------------------------------------------------------------------------------------------------------------------------------------------------------------------------------------------------------------------------------------------------------------------------------------------------------------------------------------------------------------------------------------------------------------------------------------------------------------------------------------------------------------------------------------------------------------------------------------------------------------------------------------------------------------------------------------------------------------------------------------------------------------------------------------------------------------------------------------------------------------------------------------------------------------------------------------------------------------------------------------------------------------------------------------------------------------------------------------------------------------------------------------------------------------------------------------------------------------------------------------------------------------------------------------------------------------------------------------------------------------------------------------------------------------------------------------------------------------------------------------------------------------------------------------------------------|-------------------------------------------------------------------------------------------------------------------------------------------------------------------------------------------------------------------------------------------------------------------------------------------------------------------------------------------------------------------------------------------------------------------------------------------------------------------------------------------------------------------------------------------------------------------------------------------------------------------------------------------------------------------------------------------------------------------------------------------------------------------------------------------------------------------------------------------------------------------------------------------------------------------------------------------------------------------------------------------------------------------------------------------------------------------------------------------------------------------------------------------------------------------------------------------------------------------------------------------------------------------------------------------------------------------------------------------------------------------------------------------------------------------------------------------------------------------------------------------------------------------------------------------------------------------------------------------------------------------------------------------------------------------------------------------------------------------------------------------------------------------------------------------------------------------------------------------------------------------------------------------------------------------------------------------------------------------------------------------------------------------------------------------------------------------------------------------------------------------------------------------------------------------------------------------------------------------------|

|  |                                                                                                                           |                                                                                                                                                                                                                                                                                                                                                                                                                                                                                                                                                                                                                                                                                                                                                                                                                                                                                                                                                                                                                                                                                                                                                                                                                                                                                                                                                                                                                         |                                                                                                                                                                                                                                                                                                                                                                                                                                                                                                                                                                                                                                                                                                                                                                                                                                                                                                                                                                                                                                                                                                                                                                                                                                                                                                                                                                                                                                                                                                                                                                                                                                                                                                                                                                                                                                                                                                                                                                                                                                                                                                                                                                                          |
|--|---------------------------------------------------------------------------------------------------------------------------|-------------------------------------------------------------------------------------------------------------------------------------------------------------------------------------------------------------------------------------------------------------------------------------------------------------------------------------------------------------------------------------------------------------------------------------------------------------------------------------------------------------------------------------------------------------------------------------------------------------------------------------------------------------------------------------------------------------------------------------------------------------------------------------------------------------------------------------------------------------------------------------------------------------------------------------------------------------------------------------------------------------------------------------------------------------------------------------------------------------------------------------------------------------------------------------------------------------------------------------------------------------------------------------------------------------------------------------------------------------------------------------------------------------------------|------------------------------------------------------------------------------------------------------------------------------------------------------------------------------------------------------------------------------------------------------------------------------------------------------------------------------------------------------------------------------------------------------------------------------------------------------------------------------------------------------------------------------------------------------------------------------------------------------------------------------------------------------------------------------------------------------------------------------------------------------------------------------------------------------------------------------------------------------------------------------------------------------------------------------------------------------------------------------------------------------------------------------------------------------------------------------------------------------------------------------------------------------------------------------------------------------------------------------------------------------------------------------------------------------------------------------------------------------------------------------------------------------------------------------------------------------------------------------------------------------------------------------------------------------------------------------------------------------------------------------------------------------------------------------------------------------------------------------------------------------------------------------------------------------------------------------------------------------------------------------------------------------------------------------------------------------------------------------------------------------------------------------------------------------------------------------------------------------------------------------------------------------------------------------------------|
|  | <p>patient's circumstances. The doctor will work with the patient to develop a treatment plan that is right for them.</p> | <p>Finally, the doctor may recommend that the patient participate in a clinical trial. Clinical trials are research studies that test new cancer treatments. Participating in a clinical trial may give the patient access to new treatments that are not yet available to the general public.</p> <p>The best course of treatment for a patient with metastatic melanoma who has experienced disease progression while on immunotherapy will vary depending on the individual patient's circumstances. The doctor will work with the patient to develop a treatment plan that is right for them.</p> <p>In addition to the above, the doctor may also recommend the following supportive care measures to help improve the patient's quality of life:</p> <p>* **Pain management** . Pain is a common symptom of metastatic melanoma, and it is important to ensure that the patient is receiving adequate pain relief.</p> <p>* **Nutritional support** . Patients with metastatic melanoma may experience weight loss and fatigue, and it is important to ensure that they are getting enough nutrients.</p> <p>* **Psychological support** . A diagnosis of metastatic melanoma can be a very challenging experience, and it is important for patients to have access to psychological support.</p> <p>The doctor will work with the patient to develop a plan that addresses their individual needs and goals.</p> | <p>treatment to the patient's regimen, such as chemotherapy or radiation therapy. This may help to slow the progression of the disease and improve the patient's quality of life.</p> <p>Finally, the doctor may recommend that the patient participate in a clinical trial. Clinical trials are research studies that test new cancer treatments. Participating in a clinical trial may give the patient access to new treatments that are not yet available to the general public.</p> <p>The best course of treatment for a patient with metastatic melanoma who has experienced disease progression while on immunotherapy will vary depending on the individual patient's circumstances. The doctor will work with the patient to develop a treatment plan that is right for them.</p> <p>In addition to the above, the doctor may also recommend the following supportive care measures to help improve the patient's quality of life:</p> <p>* **Pain management** . Pain is a common symptom of metastatic melanoma, and it is important to ensure that the patient is receiving adequate pain relief.</p> <p>* **Nutritional support** . Patients with metastatic melanoma may experience weight loss and fatigue, and it is important to ensure that they are getting enough nutrients.</p> <p>* **Psychological support** . A diagnosis of metastatic melanoma can be a very challenging experience, and it is important for patients to have access to psychological support.</p> <p>The doctor will work with the patient to develop a plan that addresses their individual needs and goals.</p> <p>In the specific case of the patient described in the question, the doctor will need to weigh the benefits of continuing immunotherapy against the risks of disease progression. If the patient is still deriving some benefit from the treatment, the doctor may recommend continuing treatment. However, if the patient is experiencing significant disease progression, the doctor may recommend switching to a different treatment. Ultimately, the decision of how to manage the patient will depend on the individual patient's circumstances and preferences.</p> |
|--|---------------------------------------------------------------------------------------------------------------------------|-------------------------------------------------------------------------------------------------------------------------------------------------------------------------------------------------------------------------------------------------------------------------------------------------------------------------------------------------------------------------------------------------------------------------------------------------------------------------------------------------------------------------------------------------------------------------------------------------------------------------------------------------------------------------------------------------------------------------------------------------------------------------------------------------------------------------------------------------------------------------------------------------------------------------------------------------------------------------------------------------------------------------------------------------------------------------------------------------------------------------------------------------------------------------------------------------------------------------------------------------------------------------------------------------------------------------------------------------------------------------------------------------------------------------|------------------------------------------------------------------------------------------------------------------------------------------------------------------------------------------------------------------------------------------------------------------------------------------------------------------------------------------------------------------------------------------------------------------------------------------------------------------------------------------------------------------------------------------------------------------------------------------------------------------------------------------------------------------------------------------------------------------------------------------------------------------------------------------------------------------------------------------------------------------------------------------------------------------------------------------------------------------------------------------------------------------------------------------------------------------------------------------------------------------------------------------------------------------------------------------------------------------------------------------------------------------------------------------------------------------------------------------------------------------------------------------------------------------------------------------------------------------------------------------------------------------------------------------------------------------------------------------------------------------------------------------------------------------------------------------------------------------------------------------------------------------------------------------------------------------------------------------------------------------------------------------------------------------------------------------------------------------------------------------------------------------------------------------------------------------------------------------------------------------------------------------------------------------------------------------|

|                   |                                                                                                                                                                                                                                                                                                                                                                                                                                                                                                                                                                                                                                                                                                                                                                                                                                                                                                                                                                                                                                                                                                                                                                                                                                                                                                                                                                                                                                                                                                                                                                                                                                                                                                                                                                                                                                                                                                                                                                                                                                                                                                                                                                                                                                                                                                                                                 |                                                                                                                                                                                                                                                                                                                                                                                                                                                                                                                                                                                                                                                                                                                                                                                                                                                                                                                                                                                                                                                                                                                                                                                                                                                                                                                                                                                                                                                                                                                                                                                                                                                                                                                                                                                                                                                                                                                                                                                                                                                                                                                                                                                                                                                                                                                                                                                                                                                                                        |                                                                                                                                                                                                                                                                                                                                                                                                                                                                                                                                                                                                                                                                                                                                                                                                                                                                                                                                                                                                                                                                                                                                                                                                                                                                                                                                                                                                                                                                                                                                                                                                                                                                                                                                                                                                                                                                                                                                                                                                                                                                                                                                                                                                                                                                                                                          |
|-------------------|-------------------------------------------------------------------------------------------------------------------------------------------------------------------------------------------------------------------------------------------------------------------------------------------------------------------------------------------------------------------------------------------------------------------------------------------------------------------------------------------------------------------------------------------------------------------------------------------------------------------------------------------------------------------------------------------------------------------------------------------------------------------------------------------------------------------------------------------------------------------------------------------------------------------------------------------------------------------------------------------------------------------------------------------------------------------------------------------------------------------------------------------------------------------------------------------------------------------------------------------------------------------------------------------------------------------------------------------------------------------------------------------------------------------------------------------------------------------------------------------------------------------------------------------------------------------------------------------------------------------------------------------------------------------------------------------------------------------------------------------------------------------------------------------------------------------------------------------------------------------------------------------------------------------------------------------------------------------------------------------------------------------------------------------------------------------------------------------------------------------------------------------------------------------------------------------------------------------------------------------------------------------------------------------------------------------------------------------------|----------------------------------------------------------------------------------------------------------------------------------------------------------------------------------------------------------------------------------------------------------------------------------------------------------------------------------------------------------------------------------------------------------------------------------------------------------------------------------------------------------------------------------------------------------------------------------------------------------------------------------------------------------------------------------------------------------------------------------------------------------------------------------------------------------------------------------------------------------------------------------------------------------------------------------------------------------------------------------------------------------------------------------------------------------------------------------------------------------------------------------------------------------------------------------------------------------------------------------------------------------------------------------------------------------------------------------------------------------------------------------------------------------------------------------------------------------------------------------------------------------------------------------------------------------------------------------------------------------------------------------------------------------------------------------------------------------------------------------------------------------------------------------------------------------------------------------------------------------------------------------------------------------------------------------------------------------------------------------------------------------------------------------------------------------------------------------------------------------------------------------------------------------------------------------------------------------------------------------------------------------------------------------------------------------------------------------------------------------------------------------------------------------------------------------------------------------------------------------------|--------------------------------------------------------------------------------------------------------------------------------------------------------------------------------------------------------------------------------------------------------------------------------------------------------------------------------------------------------------------------------------------------------------------------------------------------------------------------------------------------------------------------------------------------------------------------------------------------------------------------------------------------------------------------------------------------------------------------------------------------------------------------------------------------------------------------------------------------------------------------------------------------------------------------------------------------------------------------------------------------------------------------------------------------------------------------------------------------------------------------------------------------------------------------------------------------------------------------------------------------------------------------------------------------------------------------------------------------------------------------------------------------------------------------------------------------------------------------------------------------------------------------------------------------------------------------------------------------------------------------------------------------------------------------------------------------------------------------------------------------------------------------------------------------------------------------------------------------------------------------------------------------------------------------------------------------------------------------------------------------------------------------------------------------------------------------------------------------------------------------------------------------------------------------------------------------------------------------------------------------------------------------------------------------------------------------|
| <p><b>Q59</b></p> | <p>Germline mutations are changes in genes that are passed down from parents to children. Some germline mutations can increase the risk of developing cancer. When people with these mutations are treated with immunotherapy, they may have a better prognosis than people without these mutations.</p> <p>Some of the germline mutations that have been associated with a better prognosis when treated with immunotherapy include:</p> <p><b>BRCA1 and BRCA2</b>. These genes are involved in DNA repair. People with mutations in these genes are at increased risk of developing breast, ovarian, and other cancers. Studies have shown that people with BRCA1 or BRCA2 mutations who are treated with immunotherapy may have a longer progression-free survival (PFS) and overall survival (OS) than people without these mutations.</p> <p><b>PTEN</b>. This gene is involved in cell growth and differentiation. People with mutations in PTEN are at increased risk of developing a variety of cancers, including melanoma, lung cancer, and colorectal cancer. Studies have shown that people with PTEN mutations who are treated with immunotherapy may have a longer PFS and OS than people without these mutations.</p> <p><b>ATM</b>. This gene is involved in DNA repair. People with mutations in ATM are at increased risk of developing a variety of cancers, including leukemia, lymphoma, and breast cancer. Studies have shown that people with ATM mutations who are treated with immunotherapy may have a longer PFS and OS than people without these mutations.</p> <p>It is important to note that not everyone with these germline mutations will respond to immunotherapy. However, studies have shown that people with these mutations are more likely to respond to immunotherapy than people without these mutations. If you have a germline mutation that is associated with a better prognosis when treated with immunotherapy, it is important to talk to your doctor about whether immunotherapy is right for you.</p> <p>It is also important to note that germline mutations are not the only factor that determines how well someone will respond to immunotherapy. Other factors, such as the type of cancer, the stage of the cancer, and the patient's overall health status, can also play a role.</p> | <p>Here are some germline mutations in cancer that are associated with the best prognosis when treated with immunotherapy:</p> <p><b>BRCA1 and BRCA2</b>. These genes are involved in DNA repair, and people with mutations in these genes are at increased risk of developing breast, ovarian, and other cancers. Studies have shown that people with BRCA1 or BRCA2 mutations who are treated with immunotherapy may have a longer progression-free survival (PFS) and overall survival (OS) than people without these mutations.</p> <p><b>PTEN</b>. This gene is involved in cell growth and differentiation, and people with mutations in PTEN are at increased risk of developing a variety of cancers, including melanoma, lung cancer, and colorectal cancer. Studies have shown that people with PTEN mutations who are treated with immunotherapy may have a longer PFS and OS than people without these mutations.</p> <p><b>ATM</b>. This gene is involved in DNA repair, and people with mutations in ATM are at increased risk of developing a variety of cancers, including leukemia, lymphoma, and breast cancer. Studies have shown that people with ATM mutations who are treated with immunotherapy may have a longer PFS and OS than people without these mutations.</p> <p><b>Mismatch repair (MMR) genes</b>. These genes are involved in repairing errors in DNA, and people with mutations in these genes are at increased risk of developing Lynch syndrome, a type of cancer that affects the colon, rectum, uterus, and other organs. Studies have shown that people with MMR gene mutations who are treated with immunotherapy may have a longer PFS and OS than people without these mutations.</p> <p><b>CDKN2A</b>. This gene is involved in cell growth, and people with mutations in CDKN2A are at increased risk of developing melanoma, pancreatic cancer, and other cancers. Studies have shown that people with CDKN2A mutations who are treated with immunotherapy may have a longer PFS and OS than people without these mutations.</p> <p>It is important to note that not everyone with these germline mutations will respond to immunotherapy. However, studies have shown that people with these mutations are more likely to respond to immunotherapy than people without these mutations. If you have a germline mutation that is associated with a better prognosis when treated with immunotherapy, it is important to talk to your</p> | <p>There are a number of germline mutations that have been associated with a better prognosis when treated with immunotherapy. These include:</p> <p><b>BRCA1 and BRCA2</b>. These genes are involved in DNA repair, and people with mutations in these genes are at increased risk of developing breast, ovarian, and other cancers. Studies have shown that people with BRCA1 or BRCA2 mutations who are treated with immunotherapy may have a longer progression-free survival (PFS) and overall survival (OS) than people without these mutations.</p> <p><b>PTEN</b>. This gene is involved in cell growth and differentiation, and people with mutations in PTEN are at increased risk of developing a variety of cancers, including melanoma, lung cancer, and colorectal cancer. Studies have shown that people with PTEN mutations who are treated with immunotherapy may have a longer PFS and OS than people without these mutations.</p> <p><b>ATM</b>. This gene is involved in DNA repair, and people with mutations in ATM are at increased risk of developing a variety of cancers, including leukemia, lymphoma, and breast cancer. Studies have shown that people with ATM mutations who are treated with immunotherapy may have a longer PFS and OS than people without these mutations.</p> <p><b>Mismatch repair (MMR) genes</b>. These genes are involved in repairing errors in DNA, and people with mutations in these genes are at increased risk of developing Lynch syndrome, a type of cancer that affects the colon, rectum, uterus, and other organs. Studies have shown that people with MMR gene mutations who are treated with immunotherapy may have a longer PFS and OS than people without these mutations.</p> <p><b>CDKN2A</b>. This gene is involved in cell growth, and people with mutations in CDKN2A are at increased risk of developing melanoma, pancreatic cancer, and other cancers. Studies have shown that people with CDKN2A mutations who are treated with immunotherapy may have a longer PFS and OS than people without these mutations.</p> <p>It is important to note that not everyone with these germline mutations will respond to immunotherapy. However, studies have shown that people with these mutations are more likely to respond to immunotherapy</p> |
|-------------------|-------------------------------------------------------------------------------------------------------------------------------------------------------------------------------------------------------------------------------------------------------------------------------------------------------------------------------------------------------------------------------------------------------------------------------------------------------------------------------------------------------------------------------------------------------------------------------------------------------------------------------------------------------------------------------------------------------------------------------------------------------------------------------------------------------------------------------------------------------------------------------------------------------------------------------------------------------------------------------------------------------------------------------------------------------------------------------------------------------------------------------------------------------------------------------------------------------------------------------------------------------------------------------------------------------------------------------------------------------------------------------------------------------------------------------------------------------------------------------------------------------------------------------------------------------------------------------------------------------------------------------------------------------------------------------------------------------------------------------------------------------------------------------------------------------------------------------------------------------------------------------------------------------------------------------------------------------------------------------------------------------------------------------------------------------------------------------------------------------------------------------------------------------------------------------------------------------------------------------------------------------------------------------------------------------------------------------------------------|----------------------------------------------------------------------------------------------------------------------------------------------------------------------------------------------------------------------------------------------------------------------------------------------------------------------------------------------------------------------------------------------------------------------------------------------------------------------------------------------------------------------------------------------------------------------------------------------------------------------------------------------------------------------------------------------------------------------------------------------------------------------------------------------------------------------------------------------------------------------------------------------------------------------------------------------------------------------------------------------------------------------------------------------------------------------------------------------------------------------------------------------------------------------------------------------------------------------------------------------------------------------------------------------------------------------------------------------------------------------------------------------------------------------------------------------------------------------------------------------------------------------------------------------------------------------------------------------------------------------------------------------------------------------------------------------------------------------------------------------------------------------------------------------------------------------------------------------------------------------------------------------------------------------------------------------------------------------------------------------------------------------------------------------------------------------------------------------------------------------------------------------------------------------------------------------------------------------------------------------------------------------------------------------------------------------------------------------------------------------------------------------------------------------------------------------------------------------------------------|--------------------------------------------------------------------------------------------------------------------------------------------------------------------------------------------------------------------------------------------------------------------------------------------------------------------------------------------------------------------------------------------------------------------------------------------------------------------------------------------------------------------------------------------------------------------------------------------------------------------------------------------------------------------------------------------------------------------------------------------------------------------------------------------------------------------------------------------------------------------------------------------------------------------------------------------------------------------------------------------------------------------------------------------------------------------------------------------------------------------------------------------------------------------------------------------------------------------------------------------------------------------------------------------------------------------------------------------------------------------------------------------------------------------------------------------------------------------------------------------------------------------------------------------------------------------------------------------------------------------------------------------------------------------------------------------------------------------------------------------------------------------------------------------------------------------------------------------------------------------------------------------------------------------------------------------------------------------------------------------------------------------------------------------------------------------------------------------------------------------------------------------------------------------------------------------------------------------------------------------------------------------------------------------------------------------------|

|  |                                                                                                                                                                                                                                         |                                                                                                                                                                                                                                                                                                                                                                                                                                                                                                                                                                                            |                                                                                                                                                                                                                                                                                                                                                                                                                                                                                                                                                                                                                                                                                                                                                                             |
|--|-----------------------------------------------------------------------------------------------------------------------------------------------------------------------------------------------------------------------------------------|--------------------------------------------------------------------------------------------------------------------------------------------------------------------------------------------------------------------------------------------------------------------------------------------------------------------------------------------------------------------------------------------------------------------------------------------------------------------------------------------------------------------------------------------------------------------------------------------|-----------------------------------------------------------------------------------------------------------------------------------------------------------------------------------------------------------------------------------------------------------------------------------------------------------------------------------------------------------------------------------------------------------------------------------------------------------------------------------------------------------------------------------------------------------------------------------------------------------------------------------------------------------------------------------------------------------------------------------------------------------------------------|
|  | <p>If you are interested in learning more about germline mutations and immunotherapy, you can talk to your doctor or do some research online. There are many resources available that can help you understand these complex topics.</p> | <p>doctor about whether immunotherapy is right for you.</p> <p>It is also important to note that germline mutations are not the only factor that determines how well someone will respond to immunotherapy. Other factors, such as the type of cancer, the stage of the cancer, and the patient's overall health status, can also play a role.</p> <p>If you are interested in learning more about germline mutations and immunotherapy, you can talk to your doctor or do some research online. There are many resources available that can help you understand these complex topics.</p> | <p>than people without these mutations. If you have a germline mutation that is associated with a better prognosis when treated with immunotherapy, it is important to talk to your doctor about whether immunotherapy is right for you.</p> <p>It is also important to note that germline mutations are not the only factor that determines how well someone will respond to immunotherapy. Other factors, such as the type of cancer, the stage of the cancer, and the patient's overall health status, can also play a role.</p> <p>If you are interested in learning more about germline mutations and immunotherapy, you can talk to your doctor or do some research online. There are many resources available that can help you understand these complex topics.</p> |
|--|-----------------------------------------------------------------------------------------------------------------------------------------------------------------------------------------------------------------------------------------|--------------------------------------------------------------------------------------------------------------------------------------------------------------------------------------------------------------------------------------------------------------------------------------------------------------------------------------------------------------------------------------------------------------------------------------------------------------------------------------------------------------------------------------------------------------------------------------------|-----------------------------------------------------------------------------------------------------------------------------------------------------------------------------------------------------------------------------------------------------------------------------------------------------------------------------------------------------------------------------------------------------------------------------------------------------------------------------------------------------------------------------------------------------------------------------------------------------------------------------------------------------------------------------------------------------------------------------------------------------------------------------|

|                   |                                                                                                                                                                                                                                                                                                                                                                                                                                                                                                                                                                                                                                                                                                                                                                                                                                                                                                                                                                                                                                                                                                                                                                                                                                                                                                                                                                                                                                                                                                                                                                                                                                                                                                                                                                                                                                                                                                                                                                                            |                                                                                                                                                                                                                                                                                                                                                                                                                                                                                                                                                                                                                                                                                                                                                                                                                                                                                                                                                                                                                                                                                                                                                                                                                                                                                                                                                                                                                                                                                                                                                                                                                                                                                                                                                                                                                                                                                                                                                                                                                                                                                                                                                                                  |                                                                                                                                                                                                                                                                                                                                                                                                                                                                                                                                                                                                                                                                                                                                                                                                                                                                                                                                                                                                                                                                                                                                                                                                                                                                                                                                                                                                                                                                                                                                                                                                                                                                                                                                                                                                                                                                                                                                                                                                                                                   |
|-------------------|--------------------------------------------------------------------------------------------------------------------------------------------------------------------------------------------------------------------------------------------------------------------------------------------------------------------------------------------------------------------------------------------------------------------------------------------------------------------------------------------------------------------------------------------------------------------------------------------------------------------------------------------------------------------------------------------------------------------------------------------------------------------------------------------------------------------------------------------------------------------------------------------------------------------------------------------------------------------------------------------------------------------------------------------------------------------------------------------------------------------------------------------------------------------------------------------------------------------------------------------------------------------------------------------------------------------------------------------------------------------------------------------------------------------------------------------------------------------------------------------------------------------------------------------------------------------------------------------------------------------------------------------------------------------------------------------------------------------------------------------------------------------------------------------------------------------------------------------------------------------------------------------------------------------------------------------------------------------------------------------|----------------------------------------------------------------------------------------------------------------------------------------------------------------------------------------------------------------------------------------------------------------------------------------------------------------------------------------------------------------------------------------------------------------------------------------------------------------------------------------------------------------------------------------------------------------------------------------------------------------------------------------------------------------------------------------------------------------------------------------------------------------------------------------------------------------------------------------------------------------------------------------------------------------------------------------------------------------------------------------------------------------------------------------------------------------------------------------------------------------------------------------------------------------------------------------------------------------------------------------------------------------------------------------------------------------------------------------------------------------------------------------------------------------------------------------------------------------------------------------------------------------------------------------------------------------------------------------------------------------------------------------------------------------------------------------------------------------------------------------------------------------------------------------------------------------------------------------------------------------------------------------------------------------------------------------------------------------------------------------------------------------------------------------------------------------------------------------------------------------------------------------------------------------------------------|---------------------------------------------------------------------------------------------------------------------------------------------------------------------------------------------------------------------------------------------------------------------------------------------------------------------------------------------------------------------------------------------------------------------------------------------------------------------------------------------------------------------------------------------------------------------------------------------------------------------------------------------------------------------------------------------------------------------------------------------------------------------------------------------------------------------------------------------------------------------------------------------------------------------------------------------------------------------------------------------------------------------------------------------------------------------------------------------------------------------------------------------------------------------------------------------------------------------------------------------------------------------------------------------------------------------------------------------------------------------------------------------------------------------------------------------------------------------------------------------------------------------------------------------------------------------------------------------------------------------------------------------------------------------------------------------------------------------------------------------------------------------------------------------------------------------------------------------------------------------------------------------------------------------------------------------------------------------------------------------------------------------------------------------------|
| <p><b>Q60</b></p> | <p>Mismatch repair (MMR) deficiency is a condition in which the body's cells have difficulty repairing errors in DNA. This can lead to the development of cancer, including endometrial cancer.</p> <p>Endometrial cancer is cancer that starts in the lining of the uterus (the endometrium). It is the most common cancer of the female reproductive system after breast cancer.</p> <p>MMR deficiency is associated with a worse prognosis in endometrial cancer. This means that people with MMR-deficient endometrial cancer are more likely to have the cancer spread to other parts of the body and are more likely to die from the cancer.</p> <p>There are a number of reasons why MMR deficiency is associated with a worse prognosis in endometrial cancer. One reason is that MMR-deficient cells are more likely to develop mutations in other genes that can promote cancer growth. Another reason is that MMR-deficient cells are more likely to evade the immune system, which makes it more difficult for the body to fight off the cancer.</p> <p>The management of endometrial cancer in people with MMR deficiency is different from the management of endometrial cancer in people without MMR deficiency. People with MMR-deficient endometrial cancer are more likely to be treated with chemotherapy and immunotherapy. Chemotherapy is a type of cancer treatment that uses drugs to kill cancer cells. Immunotherapy is a type of cancer treatment that uses the body's own immune system to fight cancer.</p> <p>There are a number of clinical trials underway to investigate new treatments for endometrial cancer in people with MMR deficiency. These trials are testing new drugs and new combinations of drugs.</p> <p>If you have been diagnosed with endometrial cancer, it is important to talk to your doctor about your risk of MMR deficiency. If you have MMR deficiency, your doctor can discuss with you the best treatment options for you.</p> | <p>Mismatch repair deficiency (MMRd) is a condition in which the body's cells have difficulty repairing errors in DNA. This can lead to the development of cancer, including endometrial cancer. Endometrial cancer is cancer that starts in the lining of the uterus (the endometrium). It is the most common cancer of the female reproductive system after breast cancer.</p> <p>MMRd is associated with a worse prognosis in endometrial cancer. This means that people with MMRd endometrial cancer are more likely to have the cancer spread to other parts of the body and are more likely to die from the cancer.</p> <p>There are a number of reasons why MMRd is associated with a worse prognosis in endometrial cancer. One reason is that MMRd cells are more likely to develop mutations in other genes that can promote cancer growth. Another reason is that MMRd cells are more likely to evade the immune system, which makes it more difficult for the body to fight off the cancer.</p> <p>The management of endometrial cancer in people with MMRd is different from the management of endometrial cancer in people without MMRd. People with MMRd endometrial cancer are more likely to be treated with chemotherapy and immunotherapy. Chemotherapy is a type of cancer treatment that uses drugs to kill cancer cells. Immunotherapy is a type of cancer treatment that uses the body's own immune system to fight cancer.</p> <p>There are a number of clinical trials underway to investigate new treatments for endometrial cancer in people with MMRd. These trials are testing new drugs and new combinations of drugs.</p> <p>If you have been diagnosed with endometrial cancer, it is important to talk to your doctor about your risk of MMRd. If you have MMRd, your doctor can discuss with you the best treatment options for you.</p> <p>Here are some studies that support the association between MMRd and worse prognosis in endometrial cancer:</p> <p>* A study published in 2014 in the journal <i>Cancer</i> found that women with MMRd endometrial cancer were more likely to have the cancer spread to other parts of the body</p> | <p>Mismatch repair deficiency (MMRd) is a condition in which cells have difficulty repairing errors in DNA. This can lead to the development of cancer, including endometrial cancer. Endometrial cancer is cancer that starts in the lining of the uterus (the endometrium). It is the most common cancer of the female reproductive system after breast cancer.</p> <p>MMRd is associated with a worse prognosis in endometrial cancer. This means that people with MMRd endometrial cancer are more likely to have the cancer spread to other parts of the body and are more likely to die from the cancer.</p> <p>There are a number of reasons why MMRd is associated with a worse prognosis in endometrial cancer. One reason is that MMRd cells are more likely to develop mutations in other genes that can promote cancer growth. Another reason is that MMRd cells are more likely to evade the immune system, which makes it more difficult for the body to fight off the cancer.</p> <p>The management of endometrial cancer in people with MMRd is different from the management of endometrial cancer in people without MMRd. People with MMRd endometrial cancer are more likely to be treated with chemotherapy and immunotherapy. Chemotherapy is a type of cancer treatment that uses drugs to kill cancer cells. Immunotherapy is a type of cancer treatment that uses the body's own immune system to fight cancer.</p> <p>There are a number of clinical trials underway to investigate new treatments for endometrial cancer in people with MMRd. These trials are testing new drugs and new combinations of drugs.</p> <p>If you have been diagnosed with endometrial cancer, it is important to talk to your doctor about your risk of MMRd. If you have MMRd, your doctor can discuss with you the best treatment options for you.</p> <p>Here are some studies that support the association between MMRd and worse prognosis in endometrial cancer:</p> <p>* A study published in 2014 in the journal <i>Cancer</i></p> |
|-------------------|--------------------------------------------------------------------------------------------------------------------------------------------------------------------------------------------------------------------------------------------------------------------------------------------------------------------------------------------------------------------------------------------------------------------------------------------------------------------------------------------------------------------------------------------------------------------------------------------------------------------------------------------------------------------------------------------------------------------------------------------------------------------------------------------------------------------------------------------------------------------------------------------------------------------------------------------------------------------------------------------------------------------------------------------------------------------------------------------------------------------------------------------------------------------------------------------------------------------------------------------------------------------------------------------------------------------------------------------------------------------------------------------------------------------------------------------------------------------------------------------------------------------------------------------------------------------------------------------------------------------------------------------------------------------------------------------------------------------------------------------------------------------------------------------------------------------------------------------------------------------------------------------------------------------------------------------------------------------------------------------|----------------------------------------------------------------------------------------------------------------------------------------------------------------------------------------------------------------------------------------------------------------------------------------------------------------------------------------------------------------------------------------------------------------------------------------------------------------------------------------------------------------------------------------------------------------------------------------------------------------------------------------------------------------------------------------------------------------------------------------------------------------------------------------------------------------------------------------------------------------------------------------------------------------------------------------------------------------------------------------------------------------------------------------------------------------------------------------------------------------------------------------------------------------------------------------------------------------------------------------------------------------------------------------------------------------------------------------------------------------------------------------------------------------------------------------------------------------------------------------------------------------------------------------------------------------------------------------------------------------------------------------------------------------------------------------------------------------------------------------------------------------------------------------------------------------------------------------------------------------------------------------------------------------------------------------------------------------------------------------------------------------------------------------------------------------------------------------------------------------------------------------------------------------------------------|---------------------------------------------------------------------------------------------------------------------------------------------------------------------------------------------------------------------------------------------------------------------------------------------------------------------------------------------------------------------------------------------------------------------------------------------------------------------------------------------------------------------------------------------------------------------------------------------------------------------------------------------------------------------------------------------------------------------------------------------------------------------------------------------------------------------------------------------------------------------------------------------------------------------------------------------------------------------------------------------------------------------------------------------------------------------------------------------------------------------------------------------------------------------------------------------------------------------------------------------------------------------------------------------------------------------------------------------------------------------------------------------------------------------------------------------------------------------------------------------------------------------------------------------------------------------------------------------------------------------------------------------------------------------------------------------------------------------------------------------------------------------------------------------------------------------------------------------------------------------------------------------------------------------------------------------------------------------------------------------------------------------------------------------------|



|  |  |                                                                                                                                                                                                                                                                                                                                                                                                                                                                                                                                                                                                                                                                                                                                                                                                |                                                                                                                                                                                                                                                                                                                                                                                                                                                                                                                                                                                                                                                                                                                                                                                                                                                                                                                                                                                                                                                                                                                                                                                                         |
|--|--|------------------------------------------------------------------------------------------------------------------------------------------------------------------------------------------------------------------------------------------------------------------------------------------------------------------------------------------------------------------------------------------------------------------------------------------------------------------------------------------------------------------------------------------------------------------------------------------------------------------------------------------------------------------------------------------------------------------------------------------------------------------------------------------------|---------------------------------------------------------------------------------------------------------------------------------------------------------------------------------------------------------------------------------------------------------------------------------------------------------------------------------------------------------------------------------------------------------------------------------------------------------------------------------------------------------------------------------------------------------------------------------------------------------------------------------------------------------------------------------------------------------------------------------------------------------------------------------------------------------------------------------------------------------------------------------------------------------------------------------------------------------------------------------------------------------------------------------------------------------------------------------------------------------------------------------------------------------------------------------------------------------|
|  |  | <p>and were more likely to die from the cancer than women with endometrial cancer who did not have MMRd.</p> <p>* A study published in 2016 in the journal *Nature Medicine* found that MMRd cells from endometrial cancer patients were more likely to evade the immune system than cells from patients without MMRd.</p> <p>* A study published in 2017 in the journal *Cancer Cell* found that immunotherapy drugs were more effective in treating endometrial cancer patients with MMRd than in treating patients without MMRd.</p> <p>These studies suggest that MMRd is an important factor to consider in the management of endometrial cancer. Patients with MMRd endometrial cancer may be more likely to benefit from chemotherapy and immunotherapy than patients without MMRd.</p> | <p>found that women with MMRd endometrial cancer were more likely to have the cancer spread to other parts of the body and were more likely to die from the cancer than women with endometrial cancer who did not have MMRd.</p> <p>* A study published in 2016 in the journal *Nature Medicine* found that MMRd cells from endometrial cancer patients were more likely to evade the immune system than cells from patients without MMRd.</p> <p>* A study published in 2017 in the journal *Cancer Cell* found that immunotherapy drugs were more effective in treating endometrial cancer patients with MMRd than in treating patients without MMRd.</p> <p>These studies suggest that MMRd is an important factor to consider in the management of endometrial cancer. Patients with MMRd endometrial cancer may be more likely to benefit from chemotherapy and immunotherapy than patients without MMRd.</p> <p>In addition to the above, patients with MMRd endometrial cancer may also be eligible for clinical trials of new treatments. These trials are testing new drugs and new combinations of drugs that may be more effective in treating endometrial cancer in patients with MMRd.</p> |
|--|--|------------------------------------------------------------------------------------------------------------------------------------------------------------------------------------------------------------------------------------------------------------------------------------------------------------------------------------------------------------------------------------------------------------------------------------------------------------------------------------------------------------------------------------------------------------------------------------------------------------------------------------------------------------------------------------------------------------------------------------------------------------------------------------------------|---------------------------------------------------------------------------------------------------------------------------------------------------------------------------------------------------------------------------------------------------------------------------------------------------------------------------------------------------------------------------------------------------------------------------------------------------------------------------------------------------------------------------------------------------------------------------------------------------------------------------------------------------------------------------------------------------------------------------------------------------------------------------------------------------------------------------------------------------------------------------------------------------------------------------------------------------------------------------------------------------------------------------------------------------------------------------------------------------------------------------------------------------------------------------------------------------------|
