# Supplementary material for: Comparison of Large Language Models in Answering Immuno-Oncology Questions: A Cross-Sectional Study
Source: PubMed Central journal article supplement — medRxiv. 2023 Oct 31:2023.10.31.23297825. Preprint. [Version 1] doi: 10.1101/2023.10.31.23297825 (PMC10705618; doi:10.1101/2023.10.31.23297825), 2023-10-31
Supplement: media-3.pdf [file media-3.pdf]

## Supplementary Material C

- Cohen's Kappa Coefficient for Inter-Rater Reliability between the Reviewers during the Selection Process.

| <b>Variable</b> | <b>Cohen's Kappa</b> | <b>Agreement (%)</b> | <b>Subjects (n°)</b> |
|-----------------|----------------------|----------------------|----------------------|
| Reproducibility | 0.912                | 97.4                 | 152                  |
| Accuracy        | 0.889                | 94.4                 | 126                  |
| Readability     | 1                    | 100                  | 126                  |
| Relevancy       | 0.868                | 94.4                 | 126                  |
