# Supplementary material for: Comparison of Large Language Models in Answering Immuno-Oncology Questions: A Cross-Sectional Study
Source: PubMed Central journal article supplement — medRxiv. 2023 Oct 31:2023.10.31.23297825. Preprint. [Version 1] doi: 10.1101/2023.10.31.23297825 (PMC10705618; doi:10.1101/2023.10.31.23297825), 2023-10-31
Supplement: media-4.pdf [file media-4.pdf]

## **Supplementary Material D**

- Numeric data reported in Figure 2 (p. 2)
- Numeric data reported in Figure 3. (p. 3)

| Domain                       | Option             | GPT-3.5<br>n (%) | GPT-4<br>n (%) | gBARD<br>n (%) | GPT-4 vs GPT-3.5 vs gBARD  |
|------------------------------|--------------------|------------------|----------------|----------------|----------------------------|
| Questions<br>with<br>Answers | Overall            | 60 (100%)        | 60 (100%)      | 32 (53.3%)     | <i>p-value = 6.193e-16</i> |
|                              | <i>Mechanisms</i>  | 15 (100%)        | 15 (100%)      | 14 (93.3%)     |                            |
|                              | <i>Indications</i> | 15 (100%)        | 15 (100%)      | 5 (33.3%)      |                            |
|                              | <i>Toxicities</i>  | 15 (100%)        | 15 (100%)      | 0 (0%)         |                            |
|                              | <i>Prognosis</i>   | 15 (100%)        | 15 (100%)      | 13 (86.7%)     |                            |

| Domain          | Option             | GPT-3.5<br>n (%) | GPT-4<br>n (%) | gBARD<br>n (%) | GPT-4 vs GPT-3.5 vs gBARD  |
|-----------------|--------------------|------------------|----------------|----------------|----------------------------|
| Reproducibility | Overall            | 53 (88.3%)       | 57 (95%)       | 16 (50%)       | <i>p-value = 8.376e-07</i> |
|                 | <i>Mechanisms</i>  | 13 (86.7%)       | 15 (100%)      | 6 (40%)        |                            |
|                 | <i>Indications</i> | 13 (86.7%)       | 15 (100%)      | 1 (6.7%)       |                            |
|                 | <i>Toxicities</i>  | 13 (86.7%)       | 14 (93.3%)     | 0 (0%)         |                            |
|                 | <i>Prognosis</i>   | 14 (93.3%)       | 13 (86.7%)     | 9 (60%)        |                            |

| <b>Domain</b> | <b>Option</b>              | <b>GPT-3.5</b><br>n (%) | <b>GPT-4</b><br>n (%) | <b>gBARD</b><br>n (%) | GPT-4 vs GPT-3.5 vs gBARD |
|---------------|----------------------------|-------------------------|-----------------------|-----------------------|---------------------------|
| Accuracy      | <i>Answer rated as "1"</i> | 4 (7.5%)                | 0 (%)                 | 3 (18.8%)             | <i>p-value = 0.03342</i>  |
|               | <i>Answer rated as "2"</i> | 18 (34%)                | 14 (24.6%)            | 6 (37.5%)             |                           |
|               | <i>Answer rated as "3"</i> | 31 (58.5%)              | 43 (75.4%)            | 7 (43.8%)             |                           |
| Readability   | <i>Answer rated as "1"</i> | 0 (0%)                  | 0 (0%)                | 0 (0%)                | <i>p-value = 0.02126</i>  |
|               | <i>Answer rated as "2"</i> | 1 (1.9%)                | 0 (0%)                | 2 (12.5%)             |                           |
|               | <i>Answer rated as "3"</i> | 52 (98.1%)              | 57 (100%)             | 14 (87.5%)            |                           |
| Relevance     | <i>Answer rated as "1"</i> | 0 (0%)                  | 0 (0%)                | 1 (6.2%)              | <i>p-value = 0.04107</i>  |
|               | <i>Answer rated as "2"</i> | 12 (22.6%)              | 16 (28.1%)            | 8 (50%)               |                           |
|               | <i>Answer rated as "3"</i> | 41 (77.4%)              | 41 (71.9%)            | 7 (43.8%)             |                           |
